# Supplementary material for: Living Polymerization of Propylene with ansa-Dimethylsilylene(fluorenyl)(cumylamido) Titanium Complexes
Source: Polymers (Basel). 2017 Apr 5;9(4):131. doi: 10.3390/polym9040131 (PMC6432314; doi:10.3390/polym9040131)
Supplement: Supplementary file 1 [file polymers-09-00131-s001.zip]

Archive with 8 entries (8 files):
- 1a(CCDC 1539490).cif
- 1b(CCDC 1539499).cif
- 2a(CCDC 1540563).cif
- 2b-CCDC 1539502.cif
- checkcif(1a).pdf
- checkcif(1b).pdf
- checkcif(2a).pdf
- checkcif(2b).pdf
