# Supplementary material for: Living Polymerization of Propylene with ansa-Dimethylsilylene(fluorenyl)(cumylamido) Titanium Complexes
Source: Polymers (Basel). 2017 Apr 5;9(4):131. doi: 10.3390/polym9040131 (PMC6432314; doi:10.3390/polym9040131)
Supplement: Supplementary file 1 [file polymers-09-00131-s001.zip › 1a(CCDC 1539490).cif]

data_mo_dm16197_0m
_audit_creation_date              2016-04-15
_audit_creation_method
;
Olex2 1.2
(compiled 2016.02.19 svn.r3266 for OlexSys, GUI svn.r5155)
;
_publ_contact_author_address      ?
_publ_contact_author_email        ?
_publ_contact_author_name         ''
_publ_contact_author_phone        ?
_publ_section_references
;
Dolomanov, O.V., Bourhis, L.J., Gildea, R.J, Howard, J.A.K. & Puschmann, H.
 (2009), J. Appl. Cryst. 42, 339-341.

Sheldrick, G.M. (2008). Acta Cryst. A64, 112-122.

Sheldrick, G.M. (2015). Acta Cryst. C71, 3-8.
;
_chemical_name_common             ?
_chemical_name_systematic         ?
_chemical_formula_moiety          'C26 H31 N Si Ti'
_chemical_formula_sum             'C26 H31 N Si Ti'
_chemical_formula_weight          433.51
_chemical_melting_point           ?
loop_
  _atom_type_symbol
  _atom_type_description
  _atom_type_scat_dispersion_real
  _atom_type_scat_dispersion_imag
  _atom_type_scat_source
 'C' 'C' 0.0033 0.0016 'International Tables Vol C Tables 4.2.6.8 and 6.1.1.4'
 'H' 'H' 0.0000 0.0000 'International Tables Vol C Tables 4.2.6.8 and 6.1.1.4'
 'N' 'N' 0.0061 0.0033 'International Tables Vol C Tables 4.2.6.8 and 6.1.1.4'
 'Si' 'Si' 0.0817 0.0704 'International Tables Vol C Tables 4.2.6.8 and 6.1.1.4'
 'Ti' 'Ti' 0.2776 0.4457 'International Tables Vol C Tables 4.2.6.8 and 6.1.1.4'

_shelx_space_group_comment
;
The symmetry employed for this shelxl refinement is uniquely defined
by the following loop, which should always be used as a source of
symmetry information in preference to the above space-group names.
They are only intended as comments.
;
_space_group_crystal_system       'monoclinic'
_space_group_IT_number            14
_space_group_name_H-M_alt         'P 1 21/c 1'
_space_group_name_Hall            '-P 2ybc'
loop_
  _space_group_symop_operation_xyz
 'x, y, z'
 '-x, y+1/2, -z+1/2'
 '-x, -y, -z'
 'x, -y-1/2, z-1/2'

_cell_length_a                    8.8160(15)
_cell_length_b                    27.430(5)
_cell_length_c                    9.9361(18)
_cell_angle_alpha                 90
_cell_angle_beta                  108.372(4)
_cell_angle_gamma                 90
_cell_volume                      2280.3(7)
_cell_formula_units_Z             4
_cell_measurement_reflns_used     1974
_cell_measurement_temperature     130
_cell_measurement_theta_max       23.13
_cell_measurement_theta_min       2.28
_shelx_estimated_absorpt_T_max    0.978
_shelx_estimated_absorpt_T_min    0.898
_exptl_absorpt_coefficient_mu     0.440
_exptl_absorpt_correction_T_max   0.7461
_exptl_absorpt_correction_T_min   0.6434
_exptl_absorpt_correction_type    multi-scan
_exptl_absorpt_process_details
;
SADABS-2008/1 (Bruker,2008) was used for absorption correction.
wR2(int) was 0.0679 before and 0.0566 after correction.
The Ratio of minimum to maximum transmission is 0.8624.
The \l/2 correction factor is 0.0015.
;
_exptl_absorpt_special_details    ?
_exptl_crystal_colour             'orange'
_exptl_crystal_density_diffrn     1.263
_exptl_crystal_density_meas       .
_exptl_crystal_density_method     ?
_exptl_crystal_description        'block'
_exptl_crystal_F_000              920
_exptl_crystal_size_max           0.25
_exptl_crystal_size_mid           0.1
_exptl_crystal_size_min           0.05
_exptl_transmission_factor_max    ?
_exptl_transmission_factor_min    ?
_diffrn_reflns_av_R_equivalents   0.1147
_diffrn_reflns_av_unetI/netI      0.1369
_diffrn_reflns_Laue_measured_fraction_full 1.000
_diffrn_reflns_Laue_measured_fraction_max 0.994
_diffrn_reflns_limit_h_max        12
_diffrn_reflns_limit_h_min        -11
_diffrn_reflns_limit_k_max        39
_diffrn_reflns_limit_k_min        -34
_diffrn_reflns_limit_l_max        14
_diffrn_reflns_limit_l_min        -14
_diffrn_reflns_number             23087
_diffrn_reflns_point_group_measured_fraction_full 1.000
_diffrn_reflns_point_group_measured_fraction_max 0.994
_diffrn_reflns_theta_full         26.000
_diffrn_reflns_theta_max          30.611
_diffrn_reflns_theta_min          2.284
_diffrn_ambient_temperature       130
_diffrn_detector_area_resol_mean  ?
_diffrn_measured_fraction_theta_full 1.000
_diffrn_measured_fraction_theta_max 0.994
_diffrn_measurement_device_type   'Bruker APEX-II CCD'
_diffrn_measurement_method        '\f and \w scans'
_diffrn_radiation_monochromator   'graphite'
_diffrn_radiation_type            MoK\a
_diffrn_radiation_wavelength      0.71073
_diffrn_source                    ?
_diffrn_standards_number          0
_reflns_Friedel_coverage          0.000
_reflns_Friedel_fraction_full     .
_reflns_Friedel_fraction_max      .
_reflns_number_gt                 3557
_reflns_number_total              7002
_reflns_special_details
;
 Reflections were merged by SHELXL according to the crystal
 class for the calculation of statistics and refinement.
 
 _reflns_Friedel_fraction is defined as the number of unique
 Friedel pairs measured divided by the number that would be
 possible theoretically, ignoring centric projections and
 systematic absences.
;
_reflns_threshold_expression      'I > 2\s(I)'
_computing_cell_refinement        'SAINT v7.68A (Bruker, 2009)'
_computing_data_collection        ?
_computing_data_reduction         'SAINT v7.68A (Bruker, 2009)'
_computing_molecular_graphics     'Olex2 (Dolomanov et al., 2009)'
_computing_publication_material   'Olex2 (Dolomanov et al., 2009)'
_computing_structure_refinement   'ShelXL (Sheldrick, 2015)'
_computing_structure_solution     'ShelXS (Sheldrick, 2008)'
_refine_diff_density_max          0.413
_refine_diff_density_min          -0.601
_refine_diff_density_rms          0.078
_refine_ls_extinction_coef        .
_refine_ls_extinction_method      none
_refine_ls_goodness_of_fit_ref    0.947
_refine_ls_hydrogen_treatment     constr
_refine_ls_matrix_type            full
_refine_ls_number_parameters      268
_refine_ls_number_reflns          7002
_refine_ls_number_restraints      0
_refine_ls_R_factor_all           0.1460
_refine_ls_R_factor_gt            0.0512
_refine_ls_restrained_S_all       0.947
_refine_ls_shift/su_max           0.010
_refine_ls_shift/su_mean          0.000
_refine_ls_structure_factor_coef  Fsqd
_refine_ls_weighting_details
'w=1/[\s^2^(Fo^2^)+(0.0456P)^2^] where P=(Fo^2^+2Fc^2^)/3'
_refine_ls_weighting_scheme       calc
_refine_ls_wR_factor_gt           0.0963
_refine_ls_wR_factor_ref          0.1261
_refine_special_details           ?
_olex2_refinement_description
;
1. Fixed Uiso
 At 1.2 times of:
  All C(H) groups
 At 1.5 times of:
  All C(H,H,H) groups
2.a Aromatic/amide H refined with riding coordinates:
 C3(H3), C4(H4), C5(H5), C6(H6), C9(H9), C10(H10), C11(H11), C12(H12),
 C22(H22), C23(H23), C24(H24), C25(H25), C26(H26)
2.b Idealised Me refined as rotating group:
 C14(H14A,H14B,H14C), C15(H15A,H15B,H15C), C16(H16A,H16B,H16C), C17(H17A,H17B,
 H17C), C19(H19A,H19B,H19C), C20(H20A,H20B,H20C)
;
_atom_sites_solution_hydrogens    geom
_atom_sites_solution_primary      direct
_atom_sites_solution_secondary    ?
loop_
  _atom_site_label
  _atom_site_type_symbol
  _atom_site_fract_x
  _atom_site_fract_y
  _atom_site_fract_z
  _atom_site_U_iso_or_equiv
  _atom_site_adp_type
  _atom_site_occupancy
  _atom_site_site_symmetry_order
  _atom_site_calc_flag
  _atom_site_refinement_flags_posn
  _atom_site_refinement_flags_adp
  _atom_site_refinement_flags_occupancy
  _atom_site_disorder_assembly
  _atom_site_disorder_group
 Ti1 Ti 0.30833(5) 0.09846(2) 0.16744(5) 0.02017(12) Uani 1 1 d . . . . .
 Si1 Si 0.64089(8) 0.11696(3) 0.23891(8) 0.02305(17) Uani 1 1 d . . . . .
 N1 N 0.4725(2) 0.14290(7) 0.2695(2) 0.0204(5) Uani 1 1 d . . . . .
 C1 C 0.5230(3) 0.06819(9) 0.1217(3) 0.0212(5) Uani 1 1 d . . . . .
 C2 C 0.4590(3) 0.02508(10) 0.1690(3) 0.0226(6) Uani 1 1 d . . . . .
 C3 C 0.5114(3) -0.00178(10) 0.2977(3) 0.0277(6) Uani 1 1 d . . . . .
 H3 H 0.6083 0.0067 0.3688 0.033 Uiso 1 1 calc R . . . .
 C4 C 0.4214(3) -0.03989(10) 0.3183(3) 0.0315(7) Uani 1 1 d . . . . .
 H4 H 0.4574 -0.0581 0.4039 0.038 Uiso 1 1 calc R . . . .
 C5 C 0.2753(3) -0.05286(10) 0.2147(3) 0.0347(7) Uani 1 1 d . . . . .
 H5 H 0.2148 -0.0794 0.2323 0.042 Uiso 1 1 calc R . . . .
 C6 C 0.2207(3) -0.02792(10) 0.0905(3) 0.0299(6) Uani 1 1 d . . . . .
 H6 H 0.1233 -0.0370 0.0211 0.036 Uiso 1 1 calc R . . . .
 C7 C 0.3108(3) 0.01169(10) 0.0664(3) 0.0246(6) Uani 1 1 d . . . . .
 C8 C 0.2840(3) 0.04426(10) -0.0523(3) 0.0239(6) Uani 1 1 d . . . . .
 C9 C 0.1602(3) 0.04661(12) -0.1840(3) 0.0323(7) Uani 1 1 d . . . . .
 H9 H 0.0755 0.0235 -0.2071 0.039 Uiso 1 1 calc R . . . .
 C10 C 0.1654(3) 0.08274(12) -0.2768(3) 0.0389(8) Uani 1 1 d . . . . .
 H10 H 0.0831 0.0848 -0.3655 0.047 Uiso 1 1 calc R . . . .
 C11 C 0.2907(3) 0.11711(12) -0.2436(3) 0.0366(7) Uani 1 1 d . . . . .
 H11 H 0.2901 0.1422 -0.3096 0.044 Uiso 1 1 calc R . . . .
 C12 C 0.4128(3) 0.11501(11) -0.1187(3) 0.0293(6) Uani 1 1 d . . . . .
 H12 H 0.4963 0.1384 -0.0983 0.035 Uiso 1 1 calc R . . . .
 C13 C 0.4143(3) 0.07783(10) -0.0198(3) 0.0245(6) Uani 1 1 d . . . . .
 C14 C 0.1934(3) 0.06989(11) 0.3064(3) 0.0339(7) Uani 1 1 d . . . . .
 H14A H 0.1425 0.0388 0.2691 0.051 Uiso 1 1 calc GR . . . .
 H14B H 0.1120 0.0929 0.3149 0.051 Uiso 1 1 calc GR . . . .
 H14C H 0.2722 0.0646 0.3999 0.051 Uiso 1 1 calc GR . . . .
 C15 C 0.1219(3) 0.14034(11) 0.0336(3) 0.0309(7) Uani 1 1 d . . . . .
 H15A H 0.0876 0.1648 0.0899 0.046 Uiso 1 1 calc GR . . . .
 H15B H 0.0317 0.1190 -0.0140 0.046 Uiso 1 1 calc GR . . . .
 H15C H 0.1595 0.1568 -0.0376 0.046 Uiso 1 1 calc GR . . . .
 C16 C 0.7938(3) 0.09272(11) 0.4001(3) 0.0312(7) Uani 1 1 d . . . . .
 H16A H 0.7405 0.0776 0.4624 0.047 Uiso 1 1 calc GR . . . .
 H16B H 0.8620 0.1195 0.4505 0.047 Uiso 1 1 calc GR . . . .
 H16C H 0.8596 0.0683 0.3722 0.047 Uiso 1 1 calc GR . . . .
 C17 C 0.7481(3) 0.15616(11) 0.1446(3) 0.0368(7) Uani 1 1 d . . . . .
 H17A H 0.7922 0.1357 0.0850 0.055 Uiso 1 1 calc GR . . . .
 H17B H 0.8352 0.1735 0.2143 0.055 Uiso 1 1 calc GR . . . .
 H17C H 0.6733 0.1798 0.0851 0.055 Uiso 1 1 calc GR . . . .
 C18 C 0.4657(3) 0.18976(10) 0.3433(3) 0.0242(6) Uani 1 1 d . . . . .
 C19 C 0.4275(3) 0.23113(10) 0.2331(3) 0.0353(7) Uani 1 1 d . . . . .
 H19A H 0.5080 0.2316 0.1839 0.053 Uiso 1 1 calc GR . . . .
 H19B H 0.4287 0.2624 0.2811 0.053 Uiso 1 1 calc GR . . . .
 H19C H 0.3216 0.2258 0.1641 0.053 Uiso 1 1 calc GR . . . .
 C20 C 0.3288(3) 0.18826(11) 0.4075(3) 0.0333(7) Uani 1 1 d . . . . .
 H20A H 0.2266 0.1853 0.3314 0.050 Uiso 1 1 calc GR . . . .
 H20B H 0.3292 0.2183 0.4609 0.050 Uiso 1 1 calc GR . . . .
 H20C H 0.3430 0.1602 0.4713 0.050 Uiso 1 1 calc GR . . . .
 C21 C 0.6263(3) 0.19814(9) 0.4587(3) 0.0241(6) Uani 1 1 d . . . . .
 C22 C 0.6601(3) 0.17655(10) 0.5923(3) 0.0277(6) Uani 1 1 d . . . . .
 H22 H 0.5801 0.1579 0.6141 0.033 Uiso 1 1 calc R . . . .
 C23 C 0.8100(4) 0.18203(10) 0.6945(3) 0.0346(7) Uani 1 1 d . . . . .
 H23 H 0.8305 0.1676 0.7854 0.042 Uiso 1 1 calc R . . . .
 C24 C 0.9282(4) 0.20827(11) 0.6637(3) 0.0397(8) Uani 1 1 d . . . . .
 H24 H 1.0307 0.2114 0.7325 0.048 Uiso 1 1 calc R . . . .
 C25 C 0.8971(3) 0.22990(11) 0.5331(4) 0.0393(8) Uani 1 1 d . . . . .
 H25 H 0.9785 0.2481 0.5119 0.047 Uiso 1 1 calc R . . . .
 C26 C 0.7473(3) 0.22543(10) 0.4315(3) 0.0328(7) Uani 1 1 d . . . . .
 H26 H 0.7270 0.2412 0.3424 0.039 Uiso 1 1 calc R . . . .

loop_
  _atom_site_aniso_label
  _atom_site_aniso_U_11
  _atom_site_aniso_U_22
  _atom_site_aniso_U_33
  _atom_site_aniso_U_23
  _atom_site_aniso_U_13
  _atom_site_aniso_U_12
 Ti1 0.0188(2) 0.0239(2) 0.0190(2) -0.0007(2) 0.00762(17) 0.0013(2)
 Si1 0.0198(3) 0.0277(4) 0.0230(4) -0.0016(3) 0.0087(3) -0.0010(3)
 N1 0.0221(11) 0.0219(12) 0.0184(11) -0.0003(9) 0.0081(9) 0.0004(9)
 C1 0.0209(12) 0.0262(14) 0.0188(13) -0.0002(11) 0.0097(10) 0.0040(11)
 C2 0.0208(13) 0.0270(15) 0.0219(14) -0.0051(12) 0.0093(11) 0.0030(11)
 C3 0.0273(14) 0.0306(16) 0.0261(15) -0.0022(12) 0.0097(12) 0.0044(12)
 C4 0.0365(16) 0.0255(15) 0.0349(17) 0.0059(13) 0.0148(13) 0.0074(13)
 C5 0.0360(16) 0.0238(15) 0.048(2) -0.0022(14) 0.0182(15) -0.0029(13)
 C6 0.0263(14) 0.0263(15) 0.0358(18) -0.0080(13) 0.0080(13) -0.0011(12)
 C7 0.0225(13) 0.0260(15) 0.0254(15) -0.0068(12) 0.0077(11) 0.0008(11)
 C8 0.0215(13) 0.0293(15) 0.0219(14) -0.0068(12) 0.0081(11) 0.0046(11)
 C9 0.0255(15) 0.0464(19) 0.0237(16) -0.0097(14) 0.0060(12) 0.0015(13)
 C10 0.0313(16) 0.064(2) 0.0189(15) -0.0039(15) 0.0034(12) 0.0112(15)
 C11 0.0390(17) 0.0500(19) 0.0236(16) 0.0084(14) 0.0140(13) 0.0134(15)
 C12 0.0301(14) 0.0372(17) 0.0241(15) 0.0012(13) 0.0136(12) 0.0036(13)
 C13 0.0241(13) 0.0309(15) 0.0216(14) -0.0028(12) 0.0117(11) 0.0048(11)
 C14 0.0319(15) 0.0345(17) 0.0403(19) -0.0001(14) 0.0184(14) -0.0005(13)
 C15 0.0268(14) 0.0381(17) 0.0282(16) 0.0001(13) 0.0093(12) 0.0078(13)
 C16 0.0229(13) 0.0356(17) 0.0311(16) -0.0080(14) 0.0028(12) 0.0008(12)
 C17 0.0351(16) 0.0429(19) 0.0370(18) -0.0071(15) 0.0179(14) -0.0122(14)
 C18 0.0251(13) 0.0225(14) 0.0227(14) -0.0010(11) 0.0043(11) 0.0014(11)
 C19 0.0372(16) 0.0262(16) 0.0351(18) 0.0057(13) 0.0008(13) 0.0026(13)
 C20 0.0314(15) 0.0383(18) 0.0310(17) -0.0114(14) 0.0110(13) 0.0050(13)
 C21 0.0297(14) 0.0172(13) 0.0254(15) -0.0044(11) 0.0086(12) 0.0017(11)
 C22 0.0341(15) 0.0231(14) 0.0263(16) -0.0001(12) 0.0100(12) 0.0037(12)
 C23 0.0453(17) 0.0270(16) 0.0258(17) -0.0022(13) 0.0027(14) 0.0078(14)
 C24 0.0373(17) 0.0304(17) 0.040(2) -0.0095(15) -0.0044(14) 0.0021(14)
 C25 0.0321(16) 0.0317(18) 0.049(2) -0.0048(15) 0.0051(15) -0.0107(14)
 C26 0.0375(16) 0.0279(16) 0.0300(17) -0.0014(13) 0.0065(13) -0.0040(13)

_geom_special_details
;
 All esds (except the esd in the dihedral angle between two l.s. planes)
 are estimated using the full covariance matrix.  The cell esds are taken
 into account individually in the estimation of esds in distances, angles
 and torsion angles; correlations between esds in cell parameters are only
 used when they are defined by crystal symmetry.  An approximate (isotropic)
 treatment of cell esds is used for estimating esds involving l.s. planes.
;
loop_
  _geom_bond_atom_site_label_1
  _geom_bond_atom_site_label_2
  _geom_bond_distance
  _geom_bond_site_symmetry_2
  _geom_bond_publ_flag
 Ti1 Si1 2.8364(9) . ?
 Ti1 N1 1.919(2) . ?
 Ti1 C1 2.241(2) . ?
 Ti1 C2 2.409(3) . ?
 Ti1 C7 2.586(3) . ?
 Ti1 C8 2.594(3) . ?
 Ti1 C13 2.398(2) . ?
 Ti1 C14 2.104(3) . ?
 Ti1 C15 2.100(3) . ?
 Si1 N1 1.757(2) . ?
 Si1 C1 1.861(3) . ?
 Si1 C16 1.861(3) . ?
 Si1 C17 1.867(3) . ?
 N1 C18 1.491(3) . ?
 C1 C2 1.451(4) . ?
 C1 C13 1.455(4) . ?
 C2 C3 1.421(4) . ?
 C2 C7 1.429(3) . ?
 C3 H3 0.9500 . ?
 C3 C4 1.367(4) . ?
 C4 H4 0.9500 . ?
 C4 C5 1.417(4) . ?
 C5 H5 0.9500 . ?
 C5 C6 1.359(4) . ?
 C6 H6 0.9500 . ?
 C6 C7 1.410(4) . ?
 C7 C8 1.439(4) . ?
 C8 C9 1.417(4) . ?
 C8 C13 1.427(4) . ?
 C9 H9 0.9500 . ?
 C9 C10 1.365(4) . ?
 C10 H10 0.9500 . ?
 C10 C11 1.410(4) . ?
 C11 H11 0.9500 . ?
 C11 C12 1.363(4) . ?
 C12 H12 0.9500 . ?
 C12 C13 1.413(4) . ?
 C14 H14A 0.9800 . ?
 C14 H14B 0.9800 . ?
 C14 H14C 0.9800 . ?
 C15 H15A 0.9800 . ?
 C15 H15B 0.9800 . ?
 C15 H15C 0.9800 . ?
 C16 H16A 0.9800 . ?
 C16 H16B 0.9800 . ?
 C16 H16C 0.9800 . ?
 C17 H17A 0.9800 . ?
 C17 H17B 0.9800 . ?
 C17 H17C 0.9800 . ?
 C18 C19 1.539(4) . ?
 C18 C20 1.533(3) . ?
 C18 C21 1.533(4) . ?
 C19 H19A 0.9800 . ?
 C19 H19B 0.9800 . ?
 C19 H19C 0.9800 . ?
 C20 H20A 0.9800 . ?
 C20 H20B 0.9800 . ?
 C20 H20C 0.9800 . ?
 C21 C22 1.397(4) . ?
 C21 C26 1.397(4) . ?
 C22 H22 0.9500 . ?
 C22 C23 1.398(4) . ?
 C23 H23 0.9500 . ?
 C23 C24 1.378(4) . ?
 C24 H24 0.9500 . ?
 C24 C25 1.374(4) . ?
 C25 H25 0.9500 . ?
 C25 C26 1.392(4) . ?
 C26 H26 0.9500 . ?

loop_
  _geom_angle_atom_site_label_1
  _geom_angle_atom_site_label_2
  _geom_angle_atom_site_label_3
  _geom_angle
  _geom_angle_site_symmetry_1
  _geom_angle_site_symmetry_3
  _geom_angle_publ_flag
 N1 Ti1 Si1 37.47(6) . . ?
 N1 Ti1 C1 78.35(9) . . ?
 N1 Ti1 C2 101.82(9) . . ?
 N1 Ti1 C7 133.82(8) . . ?
 N1 Ti1 C8 131.10(8) . . ?
 N1 Ti1 C13 98.43(9) . . ?
 N1 Ti1 C14 109.18(10) . . ?
 N1 Ti1 C15 107.25(10) . . ?
 C1 Ti1 Si1 40.93(7) . . ?
 C1 Ti1 C2 36.14(9) . . ?
 C1 Ti1 C7 57.93(9) . . ?
 C1 Ti1 C8 57.85(9) . . ?
 C1 Ti1 C13 36.35(9) . . ?
 C2 Ti1 Si1 67.88(6) . . ?
 C2 Ti1 C7 33.00(8) . . ?
 C2 Ti1 C8 54.95(9) . . ?
 C7 Ti1 Si1 97.31(6) . . ?
 C7 Ti1 C8 32.25(8) . . ?
 C8 Ti1 Si1 96.77(6) . . ?
 C13 Ti1 Si1 67.15(7) . . ?
 C13 Ti1 C2 57.24(9) . . ?
 C13 Ti1 C7 55.15(9) . . ?
 C13 Ti1 C8 32.93(8) . . ?
 C14 Ti1 Si1 125.15(9) . . ?
 C14 Ti1 C1 127.40(11) . . ?
 C14 Ti1 C2 93.62(10) . . ?
 C14 Ti1 C7 88.66(10) . . ?
 C14 Ti1 C8 114.19(10) . . ?
 C14 Ti1 C13 143.81(11) . . ?
 C15 Ti1 Si1 126.97(8) . . ?
 C15 Ti1 C1 128.07(10) . . ?
 C15 Ti1 C2 141.35(10) . . ?
 C15 Ti1 C7 111.00(10) . . ?
 C15 Ti1 C8 86.56(10) . . ?
 C15 Ti1 C13 93.23(10) . . ?
 C15 Ti1 C14 100.17(11) . . ?
 N1 Si1 Ti1 41.64(7) . . ?
 N1 Si1 C1 93.66(10) . . ?
 N1 Si1 C16 114.72(11) . . ?
 N1 Si1 C17 116.28(12) . . ?
 C1 Si1 Ti1 52.08(7) . . ?
 C1 Si1 C16 113.08(13) . . ?
 C1 Si1 C17 111.78(13) . . ?
 C16 Si1 Ti1 124.25(9) . . ?
 C16 Si1 C17 107.07(13) . . ?
 C17 Si1 Ti1 128.63(10) . . ?
 Si1 N1 Ti1 100.88(10) . . ?
 C18 N1 Ti1 131.85(15) . . ?
 C18 N1 Si1 126.98(16) . . ?
 Si1 C1 Ti1 86.98(10) . . ?
 C2 C1 Ti1 78.25(14) . . ?
 C2 C1 Si1 125.48(19) . . ?
 C2 C1 C13 104.8(2) . . ?
 C13 C1 Ti1 77.73(14) . . ?
 C13 C1 Si1 122.8(2) . . ?
 C1 C2 Ti1 65.61(13) . . ?
 C3 C2 Ti1 117.49(17) . . ?
 C3 C2 C1 131.7(2) . . ?
 C3 C2 C7 118.3(2) . . ?
 C7 C2 Ti1 80.33(15) . . ?
 C7 C2 C1 109.9(2) . . ?
 C2 C3 H3 120.3 . . ?
 C4 C3 C2 119.5(3) . . ?
 C4 C3 H3 120.3 . . ?
 C3 C4 H4 119.3 . . ?
 C3 C4 C5 121.4(3) . . ?
 C5 C4 H4 119.3 . . ?
 C4 C5 H5 119.5 . . ?
 C6 C5 C4 120.9(3) . . ?
 C6 C5 H5 119.5 . . ?
 C5 C6 H6 120.5 . . ?
 C5 C6 C7 119.0(3) . . ?
 C7 C6 H6 120.5 . . ?
 C2 C7 Ti1 66.67(14) . . ?
 C2 C7 C8 107.6(2) . . ?
 C6 C7 Ti1 124.67(17) . . ?
 C6 C7 C2 120.9(3) . . ?
 C6 C7 C8 131.5(2) . . ?
 C8 C7 Ti1 74.18(15) . . ?
 C7 C8 Ti1 73.57(15) . . ?
 C9 C8 Ti1 125.92(18) . . ?
 C9 C8 C7 131.7(3) . . ?
 C9 C8 C13 120.7(3) . . ?
 C13 C8 Ti1 65.98(14) . . ?
 C13 C8 C7 107.6(2) . . ?
 C8 C9 H9 120.8 . . ?
 C10 C9 C8 118.5(3) . . ?
 C10 C9 H9 120.8 . . ?
 C9 C10 H10 119.4 . . ?
 C9 C10 C11 121.2(3) . . ?
 C11 C10 H10 119.4 . . ?
 C10 C11 H11 119.3 . . ?
 C12 C11 C10 121.3(3) . . ?
 C12 C11 H11 119.3 . . ?
 C11 C12 H12 120.2 . . ?
 C11 C12 C13 119.7(3) . . ?
 C13 C12 H12 120.2 . . ?
 C1 C13 Ti1 65.92(13) . . ?
 C8 C13 Ti1 81.09(14) . . ?
 C8 C13 C1 109.8(2) . . ?
 C12 C13 Ti1 116.64(18) . . ?
 C12 C13 C1 131.5(3) . . ?
 C12 C13 C8 118.5(2) . . ?
 Ti1 C14 H14A 109.5 . . ?
 Ti1 C14 H14B 109.5 . . ?
 Ti1 C14 H14C 109.5 . . ?
 H14A C14 H14B 109.5 . . ?
 H14A C14 H14C 109.5 . . ?
 H14B C14 H14C 109.5 . . ?
 Ti1 C15 H15A 109.5 . . ?
 Ti1 C15 H15B 109.5 . . ?
 Ti1 C15 H15C 109.5 . . ?
 H15A C15 H15B 109.5 . . ?
 H15A C15 H15C 109.5 . . ?
 H15B C15 H15C 109.5 . . ?
 Si1 C16 H16A 109.5 . . ?
 Si1 C16 H16B 109.5 . . ?
 Si1 C16 H16C 109.5 . . ?
 H16A C16 H16B 109.5 . . ?
 H16A C16 H16C 109.5 . . ?
 H16B C16 H16C 109.5 . . ?
 Si1 C17 H17A 109.5 . . ?
 Si1 C17 H17B 109.5 . . ?
 Si1 C17 H17C 109.5 . . ?
 H17A C17 H17B 109.5 . . ?
 H17A C17 H17C 109.5 . . ?
 H17B C17 H17C 109.5 . . ?
 N1 C18 C19 108.6(2) . . ?
 N1 C18 C20 109.9(2) . . ?
 N1 C18 C21 109.1(2) . . ?
 C20 C18 C19 107.0(2) . . ?
 C21 C18 C19 111.4(2) . . ?
 C21 C18 C20 110.8(2) . . ?
 C18 C19 H19A 109.5 . . ?
 C18 C19 H19B 109.5 . . ?
 C18 C19 H19C 109.5 . . ?
 H19A C19 H19B 109.5 . . ?
 H19A C19 H19C 109.5 . . ?
 H19B C19 H19C 109.5 . . ?
 C18 C20 H20A 109.5 . . ?
 C18 C20 H20B 109.5 . . ?
 C18 C20 H20C 109.5 . . ?
 H20A C20 H20B 109.5 . . ?
 H20A C20 H20C 109.5 . . ?
 H20B C20 H20C 109.5 . . ?
 C22 C21 C18 121.2(2) . . ?
 C22 C21 C26 117.6(3) . . ?
 C26 C21 C18 121.1(2) . . ?
 C21 C22 H22 119.5 . . ?
 C21 C22 C23 120.9(3) . . ?
 C23 C22 H22 119.5 . . ?
 C22 C23 H23 119.9 . . ?
 C24 C23 C22 120.2(3) . . ?
 C24 C23 H23 119.9 . . ?
 C23 C24 H24 120.1 . . ?
 C25 C24 C23 119.8(3) . . ?
 C25 C24 H24 120.1 . . ?
 C24 C25 H25 119.7 . . ?
 C24 C25 C26 120.5(3) . . ?
 C26 C25 H25 119.7 . . ?
 C21 C26 H26 119.5 . . ?
 C25 C26 C21 121.0(3) . . ?
 C25 C26 H26 119.5 . . ?

loop_
  _geom_torsion_atom_site_label_1
  _geom_torsion_atom_site_label_2
  _geom_torsion_atom_site_label_3
  _geom_torsion_atom_site_label_4
  _geom_torsion
  _geom_torsion_site_symmetry_1
  _geom_torsion_site_symmetry_2
  _geom_torsion_site_symmetry_3
  _geom_torsion_site_symmetry_4
  _geom_torsion_publ_flag
 Ti1 Si1 N1 C18 -174.5(3) . . . . ?
 Ti1 Si1 C1 C2 -73.26(19) . . . . ?
 Ti1 Si1 C1 C13 73.31(18) . . . . ?
 Ti1 N1 C18 C19 -83.5(3) . . . . ?
 Ti1 N1 C18 C20 33.3(3) . . . . ?
 Ti1 N1 C18 C21 154.93(18) . . . . ?
 Ti1 C1 C2 C3 -106.0(3) . . . . ?
 Ti1 C1 C2 C7 68.90(18) . . . . ?
 Ti1 C1 C13 C8 -70.02(18) . . . . ?
 Ti1 C1 C13 C12 105.1(3) . . . . ?
 Ti1 C2 C3 C4 95.0(3) . . . . ?
 Ti1 C2 C7 C6 -117.6(2) . . . . ?
 Ti1 C2 C7 C8 63.37(18) . . . . ?
 Ti1 C7 C8 C9 -123.8(3) . . . . ?
 Ti1 C7 C8 C13 57.39(17) . . . . ?
 Ti1 C8 C9 C10 78.8(3) . . . . ?
 Ti1 C8 C13 C1 60.29(16) . . . . ?
 Ti1 C8 C13 C12 -115.5(2) . . . . ?
 Si1 N1 C18 C19 89.3(2) . . . . ?
 Si1 N1 C18 C20 -154.03(19) . . . . ?
 Si1 N1 C18 C21 -32.3(3) . . . . ?
 Si1 C1 C2 Ti1 77.63(17) . . . . ?
 Si1 C1 C2 C3 -28.3(4) . . . . ?
 Si1 C1 C2 C7 146.53(19) . . . . ?
 Si1 C1 C13 Ti1 -78.20(16) . . . . ?
 Si1 C1 C13 C8 -148.22(18) . . . . ?
 Si1 C1 C13 C12 26.9(4) . . . . ?
 N1 Si1 C1 Ti1 -2.53(10) . . . . ?
 N1 Si1 C1 C2 -75.8(2) . . . . ?
 N1 Si1 C1 C13 70.8(2) . . . . ?
 N1 C18 C21 C22 -83.1(3) . . . . ?
 N1 C18 C21 C26 93.3(3) . . . . ?
 C1 Si1 N1 Ti1 3.00(11) . . . . ?
 C1 Si1 N1 C18 -171.5(2) . . . . ?
 C1 C2 C3 C4 175.8(3) . . . . ?
 C1 C2 C7 Ti1 -59.53(17) . . . . ?
 C1 C2 C7 C6 -177.2(2) . . . . ?
 C1 C2 C7 C8 3.8(3) . . . . ?
 C2 C1 C13 Ti1 74.14(16) . . . . ?
 C2 C1 C13 C8 4.1(3) . . . . ?
 C2 C1 C13 C12 179.2(3) . . . . ?
 C2 C3 C4 C5 -0.8(4) . . . . ?
 C2 C7 C8 Ti1 -58.56(17) . . . . ?
 C2 C7 C8 C9 177.6(3) . . . . ?
 C2 C7 C8 C13 -1.2(3) . . . . ?
 C3 C2 C7 Ti1 116.1(2) . . . . ?
 C3 C2 C7 C6 -1.5(4) . . . . ?
 C3 C2 C7 C8 179.5(2) . . . . ?
 C3 C4 C5 C6 0.5(4) . . . . ?
 C4 C5 C6 C7 -0.7(4) . . . . ?
 C5 C6 C7 Ti1 -80.3(3) . . . . ?
 C5 C6 C7 C2 1.2(4) . . . . ?
 C5 C6 C7 C8 180.0(3) . . . . ?
 C6 C7 C8 Ti1 122.6(3) . . . . ?
 C6 C7 C8 C9 -1.2(5) . . . . ?
 C6 C7 C8 C13 180.0(3) . . . . ?
 C7 C2 C3 C4 1.3(4) . . . . ?
 C7 C8 C9 C10 179.0(3) . . . . ?
 C7 C8 C13 Ti1 -62.20(18) . . . . ?
 C7 C8 C13 C1 -1.9(3) . . . . ?
 C7 C8 C13 C12 -177.7(2) . . . . ?
 C8 C9 C10 C11 0.1(4) . . . . ?
 C9 C8 C13 Ti1 118.8(2) . . . . ?
 C9 C8 C13 C1 179.1(2) . . . . ?
 C9 C8 C13 C12 3.3(4) . . . . ?
 C9 C10 C11 C12 1.2(4) . . . . ?
 C10 C11 C12 C13 -0.2(4) . . . . ?
 C11 C12 C13 Ti1 -96.3(3) . . . . ?
 C11 C12 C13 C1 -176.8(3) . . . . ?
 C11 C12 C13 C8 -2.0(4) . . . . ?
 C13 C1 C2 Ti1 -73.76(16) . . . . ?
 C13 C1 C2 C3 -179.7(2) . . . . ?
 C13 C1 C2 C7 -4.9(3) . . . . ?
 C13 C8 C9 C10 -2.3(4) . . . . ?
 C16 Si1 N1 Ti1 -114.51(13) . . . . ?
 C16 Si1 N1 C18 71.0(2) . . . . ?
 C16 Si1 C1 Ti1 116.34(11) . . . . ?
 C16 Si1 C1 C2 43.1(2) . . . . ?
 C16 Si1 C1 C13 -170.36(19) . . . . ?
 C17 Si1 N1 Ti1 119.50(13) . . . . ?
 C17 Si1 N1 C18 -55.0(2) . . . . ?
 C17 Si1 C1 Ti1 -122.74(12) . . . . ?
 C17 Si1 C1 C2 164.0(2) . . . . ?
 C17 Si1 C1 C13 -49.4(2) . . . . ?
 C18 C21 C22 C23 176.3(2) . . . . ?
 C18 C21 C26 C25 -175.1(3) . . . . ?
 C19 C18 C21 C22 157.0(2) . . . . ?
 C19 C18 C21 C26 -26.6(3) . . . . ?
 C20 C18 C21 C22 38.0(3) . . . . ?
 C20 C18 C21 C26 -145.6(3) . . . . ?
 C21 C22 C23 C24 -1.2(4) . . . . ?
 C22 C21 C26 C25 1.4(4) . . . . ?
 C22 C23 C24 C25 1.3(4) . . . . ?
 C23 C24 C25 C26 -0.1(5) . . . . ?
 C24 C25 C26 C21 -1.3(5) . . . . ?
 C26 C21 C22 C23 -0.2(4) . . . . ?

_shelx_res_file
;
    mo_dm16197_0m.res created by SHELXL-2014/7

TITL mo_dm16197_0m in P2(1)/c
CELL 0.71073 8.816 27.4298 9.9361 90 108.372 90
ZERR 4 0.0015 0.0051 0.0018 0 0.004 0
LATT 1
SYMM -X,0.5+Y,0.5-Z
SFAC C H N Si Ti
UNIT 104 124 4 4 4

L.S. 6
PLAN  -10 0 0
SIZE 0.05 0.1 0.25
TEMP -143.15
BOND $H
fmap 2
MORE -1
ACTA 52
CONF
REM <olex2.extras>
REM <HklSrc "%.\\mo_dm16197_0m.hkl">
REM </olex2.extras>

WGHT    0.045600
FVAR       0.16123
TI1   5    0.308328    0.098459    0.167438    11.00000    0.01877    0.02392 =
         0.01899   -0.00066    0.00762    0.00132
SI1   4    0.640893    0.116956    0.238911    11.00000    0.01984    0.02770 =
         0.02300   -0.00164    0.00874   -0.00101
N1    3    0.472495    0.142895    0.269535    11.00000    0.02206    0.02187 =
         0.01841   -0.00034    0.00806    0.00037
C1    1    0.523018    0.068189    0.121670    11.00000    0.02094    0.02616 =
         0.01877   -0.00024    0.00966    0.00396
C2    1    0.458988    0.025083    0.169000    11.00000    0.02079    0.02702 =
         0.02185   -0.00512    0.00927    0.00296
C3    1    0.511444   -0.001779    0.297660    11.00000    0.02733    0.03063 =
         0.02606   -0.00216    0.00967    0.00436
AFIX  43
H3    2    0.608344    0.006680    0.368787    11.00000   -1.20000
AFIX   0
C4    1    0.421364   -0.039889    0.318269    11.00000    0.03652    0.02549 =
         0.03485    0.00589    0.01476    0.00735
AFIX  43
H4    2    0.457419   -0.058071    0.403853    11.00000   -1.20000
AFIX   0
C5    1    0.275316   -0.052860    0.214685    11.00000    0.03603    0.02384 =
         0.04779   -0.00221    0.01819   -0.00289
AFIX  43
H5    2    0.214756   -0.079354    0.232266    11.00000   -1.20000
AFIX   0
C6    1    0.220698   -0.027917    0.090537    11.00000    0.02633    0.02634 =
         0.03578   -0.00795    0.00805   -0.00108
AFIX  43
H6    2    0.123297   -0.037021    0.021071    11.00000   -1.20000
AFIX   0
C7    1    0.310818    0.011686    0.066409    11.00000    0.02247    0.02603 =
         0.02537   -0.00684    0.00766    0.00084
C8    1    0.284004    0.044263   -0.052317    11.00000    0.02149    0.02926 =
         0.02191   -0.00675    0.00806    0.00455
C9    1    0.160219    0.046607   -0.183981    11.00000    0.02552    0.04637 =
         0.02372   -0.00965    0.00604    0.00152
AFIX  43
H9    2    0.075514    0.023543   -0.207120    11.00000   -1.20000
AFIX   0
C10   1    0.165393    0.082744   -0.276835    11.00000    0.03125    0.06350 =
         0.01892   -0.00391    0.00341    0.01120
AFIX  43
H10   2    0.083064    0.084785   -0.365462    11.00000   -1.20000
AFIX   0
C11   1    0.290731    0.117111   -0.243615    11.00000    0.03902    0.05003 =
         0.02361    0.00843    0.01398    0.01344
AFIX  43
H11   2    0.290129    0.142236   -0.309589    11.00000   -1.20000
AFIX   0
C12   1    0.412756    0.115010   -0.118728    11.00000    0.03011    0.03722 =
         0.02412    0.00125    0.01358    0.00356
AFIX  43
H12   2    0.496338    0.138429   -0.098281    11.00000   -1.20000
AFIX   0
C13   1    0.414314    0.077826   -0.019832    11.00000    0.02411    0.03086 =
         0.02162   -0.00277    0.01170    0.00481
C14   1    0.193408    0.069893    0.306379    11.00000    0.03185    0.03454 =
         0.04028   -0.00006    0.01838   -0.00051
AFIX 137
H14A  2    0.142502    0.038822    0.269058    11.00000   -1.50000
H14B  2    0.111995    0.092949    0.314872    11.00000   -1.50000
H14C  2    0.272206    0.064606    0.399916    11.00000   -1.50000
AFIX   0
C15   1    0.121916    0.140342    0.033606    11.00000    0.02683    0.03808 =
         0.02816    0.00014    0.00926    0.00778
AFIX 137
H15A  2    0.087566    0.164764    0.089923    11.00000   -1.50000
H15B  2    0.031715    0.119038   -0.013985    11.00000   -1.50000
H15C  2    0.159488    0.156766   -0.037564    11.00000   -1.50000
AFIX   0
C16   1    0.793826    0.092715    0.400086    11.00000    0.02286    0.03560 =
         0.03112   -0.00801    0.00283    0.00082
AFIX 137
H16A  2    0.740491    0.077574    0.462396    11.00000   -1.50000
H16B  2    0.861959    0.119466    0.450487    11.00000   -1.50000
H16C  2    0.859559    0.068341    0.372247    11.00000   -1.50000
AFIX   0
C17   1    0.748126    0.156163    0.144613    11.00000    0.03514    0.04285 =
         0.03700   -0.00709    0.01785   -0.01220
AFIX 137
H17A  2    0.792150    0.135727    0.085016    11.00000   -1.50000
H17B  2    0.835224    0.173522    0.214276    11.00000   -1.50000
H17C  2    0.673283    0.179817    0.085056    11.00000   -1.50000
AFIX   0
C18   1    0.465695    0.189765    0.343329    11.00000    0.02507    0.02253 =
         0.02265   -0.00105    0.00430    0.00137
C19   1    0.427514    0.231135    0.233117    11.00000    0.03717    0.02620 =
         0.03508    0.00571    0.00084    0.00264
AFIX 137
H19A  2    0.507966    0.231564    0.183942    11.00000   -1.50000
H19B  2    0.428705    0.262420    0.281070    11.00000   -1.50000
H19C  2    0.321553    0.225766    0.164148    11.00000   -1.50000
AFIX   0
C20   1    0.328786    0.188259    0.407523    11.00000    0.03141    0.03828 =
         0.03099   -0.01145    0.01097    0.00499
AFIX 137
H20A  2    0.226645    0.185301    0.331377    11.00000   -1.50000
H20B  2    0.329206    0.218327    0.460908    11.00000   -1.50000
H20C  2    0.342997    0.160185    0.471315    11.00000   -1.50000
AFIX   0
C21   1    0.626316    0.198145    0.458744    11.00000    0.02970    0.01723 =
         0.02543   -0.00440    0.00859    0.00167
C22   1    0.660113    0.176552    0.592347    11.00000    0.03412    0.02310 =
         0.02627   -0.00005    0.00999    0.00370
AFIX  43
H22   2    0.580077    0.157886    0.614057    11.00000   -1.20000
AFIX   0
C23   1    0.810021    0.182029    0.694506    11.00000    0.04528    0.02698 =
         0.02575   -0.00225    0.00273    0.00783
AFIX  43
H23   2    0.830488    0.167616    0.785443    11.00000   -1.20000
AFIX   0
C24   1    0.928162    0.208268    0.663680    11.00000    0.03735    0.03037 =
         0.03982   -0.00947   -0.00437    0.00213
AFIX  43
H24   2    1.030718    0.211390    0.732481    11.00000   -1.20000
AFIX   0
C25   1    0.897114    0.229903    0.533079    11.00000    0.03207    0.03165 =
         0.04892   -0.00483    0.00512   -0.01071
AFIX  43
H25   2    0.978525    0.248059    0.511913    11.00000   -1.20000
AFIX   0
C26   1    0.747289    0.225433    0.431502    11.00000    0.03751    0.02791 =
         0.02998   -0.00144    0.00655   -0.00403
AFIX  43
H26   2    0.726990    0.241160    0.342374    11.00000   -1.20000
AFIX   0
HKLF 4

REM  mo_dm16197_0m in P2(1)/c
REM R1 =  0.0512 for    3557 Fo > 4sig(Fo)  and  0.1460 for all    7002 data
REM    268 parameters refined using      0 restraints

END

WGHT      0.0456      0.0000

REM Highest difference peak  0.413,  deepest hole -0.601,  1-sigma level  0.078
Q1    1   0.9703  0.1178  0.0991  11.00000  0.05    0.41
Q2    1   0.0831  0.0992  0.4979  11.00000  0.05    0.39
Q3    1   0.5509  0.0939  0.1620  11.00000  0.05    0.38
Q4    1   0.1836  0.1208  0.0997  11.00000  0.05    0.38
Q5    1   0.0741  0.0658  0.2248  11.00000  0.05    0.37
Q6    1   0.2185  0.0973  0.1991  11.00000  0.05    0.36
Q7    1   0.7561  0.1171  0.4330  11.00000  0.05    0.35
Q8    1   0.7589  0.0904  0.3090  11.00000  0.05    0.35
Q9    1   0.2058  0.2361  0.2138  11.00000  0.05    0.31
Q10   1   0.3097  0.0966  0.2583  11.00000  0.05    0.31
;
_shelx_res_checksum               71318
_shelx_hkl_file
;
   1   0   0 1000.00   20.12
   1   0   0  990.68   20.69
  -1   0   0  980.44   18.75
   2   0   0  367.20    8.10
   2   0   0  366.97    8.26
  -2   0   0  353.73    7.24
   3   0   0    1.42    0.84
  -3   0   0    3.01    0.81
   3   0   0    2.16    1.06
   4   0   0    0.05    1.13
  -4   0   0    1.52    0.93
   4   0   0    1.25    1.02
  -5   0   0   82.18    2.88
   5   0   0   92.51    3.87
   5   0   0   88.53    3.72
  -6   0   0   41.79    2.56
   6   0   0   42.54    3.30
   6   0   0   38.53    3.28
   7   0   0   -0.02    1.74
  -7   0   0    0.13    1.39
   7   0   0    2.08    1.54
   8   0   0   17.51    2.34
   8   0   0   17.99    2.49
   9   0   0   -0.94    1.68
  10   0   0    4.03    2.09
  11   0   0   -0.99    1.93
   0  -1   0   -0.07    0.03
   0  -1   0   -0.05    0.02
   0   1   0   -0.03    0.03
   0   1   0   -0.04    0.02
   1  -1   0    2.88    0.48
   1  -1   0    2.71    0.39
  -1  -1   0    4.11    0.28
   1   1   0    3.40    0.44
  -1   1   0    4.27    0.43
   1   1   0    3.32    0.48
   2  -1   0   68.11    2.67
   2  -1   0   69.34    2.55
  -2  -1   0   78.79    1.97
  -2   1   0   67.47    2.26
  -3  -1   0    8.75    0.88
   3  -1   0    8.49    1.21
   3  -1   0    8.46    1.22
   3   1   0    7.65    1.21
   3   1   0    6.93    1.07
  -3   1   0    8.77    0.99
   4  -1   0    0.61    1.21
   4  -1   0    1.92    1.09
  -4  -1   0    0.91    0.83
   4   1   0    0.87    0.99
  -4   1   0   -1.12    0.88
   4   1   0    2.53    1.21
   5  -1   0    4.13    1.38
   5  -1   0    2.63    1.39
  -5  -1   0    2.16    1.02
   5   1   0    5.00    1.47
  -5   1   0    2.43    1.14
   5   1   0    2.42    1.26
   6  -1   0  113.71    4.89
   6  -1   0  118.01    4.77
  -6  -1   0  110.91    3.57
  -6   1   0  110.70    3.79
   6   1   0  111.58    4.67
   6   1   0  119.08    4.83
  -7  -1   0   43.83    2.63
   7  -1   0   45.10    3.60
   7  -1   0   43.74    3.77
   7   1   0   45.19    3.55
   7   1   0   42.87    3.64
  -7   1   0   42.91    2.98
   8  -1   0   12.65    2.25
   8  -1   0   12.62    2.19
   8   1   0   11.46    2.07
   8   1   0   11.78    2.21
  -8   1   0   11.05    1.83
   9  -1   0   18.15    2.71
   9   1   0   16.37    2.49
  10  -1   0    7.53    2.28
  10   1   0    8.18    2.24
  11  -1   0    3.47    2.21
  11   1   0    4.27    2.28
   1   2   0   68.47    1.83
   1   2   0   67.51    1.90
  -1   2   0   63.66    1.69
   2  -2   0   47.61    2.38
   2  -2   0   44.82    2.27
  -2  -2   0   48.30    1.42
   2   2   0   46.59    2.03
   2   2   0   51.40    2.30
  -2   2   0   42.47    1.96
   3  -2   0   31.44    1.98
   3  -2   0   29.08    2.11
  -3  -2   0   28.43    1.32
   3   2   0   26.71    1.90
   3   2   0   29.60    2.01
  -3   2   0   27.84    1.81
  -4  -2   0   29.29    1.58
   4  -2   0   30.23    2.47
   4  -2   0   33.63    2.58
   4   2   0   30.09    2.48
   4   2   0   30.57    2.23
  -4   2   0   27.83    1.94
   5  -2   0    2.62    1.44
   5  -2   0    1.30    1.30
  -5  -2   0    1.78    0.94
   5   2   0    2.20    1.44
   5   2   0    2.29    1.22
  -5   2   0    2.68    1.20
   6  -2   0   11.49    2.02
   6  -2   0    9.67    1.97
  -6  -2   0   14.42    1.46
  -6   2   0   10.67    1.73
   6   2   0   17.59    2.17
  -7  -2   0    9.66    1.50
   7  -2   0    8.95    2.00
   7  -2   0    9.74    2.08
   7   2   0    8.82    2.01
   7   2   0    9.31    2.10
  -7   2   0   12.69    1.91
   8  -2   0    6.19    1.87
   8  -2   0    7.15    2.04
   8   2   0    6.59    1.95
   8   2   0    5.27    1.93
  -8   2   0    8.12    1.79
   9  -2   0    2.89    1.91
   9   2   0    0.13    1.60
  10  -2   0    3.77    2.08
  10   2   0    7.06    2.23
  11  -2   0    0.39    2.09
  11   2   0    0.84    1.94
   0   3   0   -0.52    0.28
   0   3   0   -0.16    0.26
   1   3   0  412.25    8.64
   1   3   0  396.76    8.93
  -1   3   0  402.67    8.04
  -1   3   0  407.05    8.64
   2  -3   0   37.44    2.45
  -2  -3   0   35.70    1.07
   2   3   0   33.57    1.86
   2   3   0   41.04    2.20
  -2   3   0   35.15    1.97
   3  -3   0    3.19    1.12
   3  -3   0    4.37    1.12
  -3  -3   0    4.67    0.64
   3   3   0    2.97    1.05
  -3   3   0    3.46    1.00
   3   3   0    3.39    0.92
   4  -3   0   83.28    3.34
   4  -3   0   78.20    3.48
  -4  -3   0   79.08    2.32
   4   3   0   82.16    3.49
  -4   3   0   79.02    2.88
   4   3   0   86.32    3.36
   5  -3   0    1.14    1.35
   5  -3   0    1.42    1.49
  -5  -3   0    1.67    0.84
  -5   3   0    1.97    1.25
   5   3   0    2.93    1.45
   5   3   0    1.56    1.19
  -6  -3   0   77.12    2.78
   6  -3   0   76.66    3.98
   6  -3   0   80.05    4.27
   6   3   0   82.77    4.17
   6   3   0   81.89    4.10
  -6   3   0   77.02    3.43
   7  -3   0   16.87    2.32
  -7  -3   0   14.25    1.52
   7  -3   0   12.40    2.18
   7   3   0   13.19    2.21
  -7   3   0   15.72    2.10
   7   3   0   13.63    2.06
   8  -3   0   23.37    2.79
   8   3   0   28.42    2.76
   8   3   0   27.40    2.81
  -8   3   0   30.81    2.57
   9  -3   0   45.05    3.73
   9   3   0   44.00    3.66
   9   3   0   40.22    3.76
  10  -3   0    1.19    1.99
  10   3   0    0.58    1.83
  11  -3   0    3.20    2.29
  11   3   0    4.00    2.26
   0   4   0  174.27    3.78
   0   4   0  192.08    4.29
  -1  -4   0   20.40    0.68
  -1   4   0   19.99    0.96
  -1   4   0   20.48    1.23
   1   4   0   22.00    1.20
   1   4   0   23.35    1.26
   1   4   0   21.26    0.70
   2  -4   0  130.39    3.92
   2   4   0  131.09    3.62
   2   4   0  132.67    3.88
  -2   4   0  128.06    3.42
   3  -4   0   79.92    2.77
   3  -4   0   76.98    3.05
  -3  -4   0   79.11    1.89
   3   4   0   82.23    3.27
   3   4   0   84.48    3.03
  -3   4   0   79.68    2.73
  -4  -4   0   39.59    1.47
   4  -4   0   39.12    2.54
   4  -4   0   40.78    2.56
   4   4   0   39.29    2.41
  -4   4   0   35.24    2.16
   4   4   0   35.82    2.55
   5  -4   0    2.88    1.50
   5  -4   0    2.86    1.52
  -5  -4   0    3.30    0.79
  -5   4   0    1.88    1.27
   5   4   0    3.65    1.44
   5   4   0    2.61    1.12
   6  -4   0   40.68    3.52
   6  -4   0   40.82    3.38
  -6  -4   0   37.06    1.97
   6   4   0   43.05    3.16
  -6   4   0   38.99    2.66
   6   4   0   46.12    3.27
   7  -4   0    0.47    1.76
   7  -4   0   -1.37    1.73
   7   4   0    1.51    1.60
   7   4   0    3.12    1.77
  -7   4   0    0.14    1.52
   8  -4   0   -0.15    1.58
   8   4   0    3.89    1.72
  -8   4   0    0.34    1.59
   8   4   0    1.28    1.75
   9  -4   0   -0.16    1.82
   9   4   0   -0.58    1.74
   9   4   0    1.05    1.72
  10  -4   0   -0.42    1.90
  10   4   0    0.63    1.83
  11  -4   0   -0.82    2.01
  11   4   0    0.05    1.88
   0   5   0    0.04    0.45
   0   5   0    0.02    0.56
   1   5   0   24.47    1.53
   1   5   0   24.81    0.99
  -1   5   0   24.68    1.70
   1   5   0   22.12    1.44
  -1   5   0   23.30    1.25
   2   5   0   17.94    1.53
   2   5   0   21.78    1.96
  -2   5   0   21.93    1.68
   3  -5   0    5.30    1.32
   3  -5   0    5.47    1.07
   3   5   0    4.86    1.00
   3   5   0    5.27    1.15
  -3   5   0    6.23    1.21
  -4  -5   0    0.91    0.51
   4  -5   0    2.55    1.33
   4  -5   0    1.13    1.26
   4   5   0    2.58    1.04
   4   5   0    3.15    1.23
  -4   5   0    1.48    1.19
  -5  -5   0   42.42    1.60
   5  -5   0   44.12    3.32
   5  -5   0   48.00    3.05
   5   5   0   42.13    3.16
   5   5   0   46.52    2.95
  -5   5   0   44.87    2.72
  -6  -5   0   17.63    1.24
   6  -5   0   14.77    2.35
   6  -5   0   16.59    2.24
   6   5   0   15.17    2.20
  -6   5   0   16.77    2.02
   6   5   0   14.46    2.03
   7  -5   0    6.66    1.97
   7  -5   0    3.87    2.01
   7   5   0    5.09    1.87
   7   5   0    3.56    1.70
  -7   5   0    3.36    1.84
   8  -5   0    3.80    1.98
   8   5   0    1.57    1.44
  -8   5   0    2.83    1.81
   8   5   0    1.26    1.74
   9  -5   0   -1.78    1.77
   9   5   0   -0.45    1.57
   9   5   0    0.75    1.84
  -9   5   0   -0.99    1.69
  10  -5   0   -1.21    1.82
  10   5   0    0.64    1.84
  11  -5   0    1.61    2.15
  11   5   0    3.93    2.22
   0   6   0   98.64    2.67
   0   6   0  105.45    2.95
   1   6   0    8.86    1.01
  -1   6   0   12.03    1.33
   1   6   0    8.44    1.13
   1   6   0   13.92    1.15
  -1   6   0    9.13    0.87
  -2   6   0   69.06    2.64
  -2   6   0   71.67    2.16
   2   6   0   69.42    2.55
   2   6   0   65.28    2.79
   3  -6   0   19.42    1.83
   3   6   0   23.33    2.11
  -3   6   0   22.91    1.94
   3   6   0   22.64    1.74
   4  -6   0    5.93    1.56
   4  -6   0    3.74    1.24
  -4   6   0    4.45    1.31
   4   6   0    4.46    1.33
   4   6   0    3.21    1.10
   5  -6   0    0.17    1.54
  -5  -6   0   -0.25    0.52
   5  -6   0    0.63    1.54
   5   6   0    0.02    1.45
   5   6   0    0.23    1.15
  -5   6   0   -0.43    1.30
  -6  -6   0    0.27    0.68
   6  -6   0    2.89    1.89
   6  -6   0    1.41    1.82
  -6   6   0    0.12    1.63
   6   6   0    0.74    1.60
   6   6   0    0.36    1.20
   7  -6   0   14.39    2.19
   7  -6   0   13.93    2.43
  -7   6   0   19.52    2.34
   7   6   0   12.38    2.15
   7   6   0   14.47    2.21
   8  -6   0   15.98    2.44
   8   6   0   16.66    2.41
   8   6   0   14.76    2.38
  -8   6   0   15.12    2.25
   9  -6   0    0.08    1.89
  -9   6   0   -1.22    1.77
   9   6   0    1.51    1.72
   9   6   0   -2.18    1.77
  10  -6   0    3.87    2.21
  10   6   0    7.94    2.34
  11  -6   0    0.44    2.18
  11   6   0   -1.03    1.87
   0   7   0    1.16    0.97
   0   7   0    1.18    0.81
  -1   7   0  113.39    3.36
   1   7   0  116.22    3.63
   1   7   0  117.56    2.80
  -1   7   0  122.71    3.27
   2   7   0   58.20    2.50
  -2   7   0   59.93    2.40
  -2   7   0   59.01    2.02
   2   7   0   56.75    2.37
   3  -7   0    8.76    1.48
  -3   7   0    9.43    1.38
   3   7   0    7.72    1.14
   3   7   0    8.26    1.31
   4  -7   0    7.95    1.61
   4  -7   0    7.05    1.34
   4   7   0    7.10    1.47
  -4   7   0    6.00    1.43
   4   7   0    6.48    1.26
   5  -7   0    7.21    1.88
   5  -7   0    5.47    1.70
   5   7   0    7.24    1.67
   5   7   0    5.64    1.41
  -5   7   0    5.15    1.59
   6  -7   0   13.97    2.21
   6  -7   0   13.58    2.25
  -6   7   0   17.39    2.24
   6   7   0   13.21    1.99
   6   7   0   14.32    2.21
   7  -7   0    4.93    1.88
   7  -7   0    1.61    1.91
   7   7   0    3.18    1.63
  -7   7   0    0.59    1.71
   7   7   0    1.14    1.62
   8  -7   0   17.85    2.73
   8   7   0   20.32    2.63
   8   7   0   20.53    2.61
  -8   7   0   25.55    2.73
   9  -7   0   54.37    4.44
   9   7   0   56.14    4.19
  -9   7   0   50.43    3.46
   9   7   0   52.05    4.32
  10  -7   0   10.31    2.63
  10   7   0   13.02    2.62
  11  -7   0    1.41    2.19
  11   7   0    1.11    2.10
   0   8   0    3.92    0.84
   0   8   0    5.50    1.03
  -1   8   0   30.44    1.59
  -1   8   0   25.63    1.74
   1   8   0   26.47    2.00
   1   8   0   26.77    1.42
   2   8   0   21.49    0.86
  -2   8   0   25.66    2.05
   2   8   0   20.23    1.69
  -2   8   0   22.32    1.38
   2   8   0   22.19    2.00
   3   8   0   44.80    2.35
  -3   8   0   46.25    2.51
   3   8   0   41.92    2.58
   4  -8   0    3.24    1.64
  -4   8   0    2.90    1.39
   4   8   0    2.05    1.17
   4   8   0    2.87    1.11
   5  -8   0   14.75    1.91
   5  -8   0   14.32    2.24
   5   8   0   14.08    1.81
   5   8   0   15.60    2.04
  -5   8   0   14.82    1.88
   6  -8   0    0.36    1.95
   6  -8   0   -1.73    1.83
   6   8   0    1.21    1.59
   6   8   0   -1.86    1.27
  -6   8   0    0.68    1.73
   7  -8   0    1.00    1.91
  -7   8   0    0.24    1.72
   7   8   0    1.32    1.39
   7   8   0    1.64    1.75
   8  -8   0    3.50    2.11
   8   8   0    3.99    1.99
  -8   8   0    3.32    1.99
   8   8   0    5.75    1.91
   9  -8   0    4.20    2.25
   9   8   0    4.07    1.92
   9   8   0    0.91    2.00
  -9   8   0    1.70    2.01
  10  -8   0   -0.95    2.02
  10   8   0    0.57    1.78
  11  -8   0   -1.21    2.13
  11   8   0    2.35    2.01
   0   9   0    0.32    0.78
   0   9   0    0.58    0.91
  -1   9   0   26.96    2.02
   1   9   0   29.10    2.07
   1   9   0   30.69    1.50
  -1   9   0   28.77    1.64
   2   9   0   17.56    0.93
  -2   9   0   20.10    1.35
   2   9   0   19.38    1.57
  -2   9   0   19.78    1.70
   2   9   0   21.60    1.85
  -3   9   0   26.14    2.06
   3   9   0   25.25    2.33
   3   9   0   27.68    1.93
   4  -9   0   15.44    2.16
   4   9   0   13.27    1.74
   4   9   0   11.85    1.46
  -4   9   0   13.65    1.80
   5  -9   0    5.40    2.03
   5  -9   0    4.17    1.63
  -5   9   0    0.89    1.64
   5   9   0    3.38    1.55
   5   9   0    3.29    1.36
   6  -9   0   -0.87    1.92
   6  -9   0    2.99    2.13
  -6   9   0    0.58    1.86
   6   9   0   -1.22    1.33
   6   9   0    1.52    1.68
   7  -9   0   -1.82    1.84
   7   9   0    1.36    1.67
  -7   9   0   -0.11    1.76
   7   9   0   -0.39    1.38
   8  -9   0    3.17    2.19
  -8   9   0    2.48    2.03
   8   9   0    2.04    1.63
   8   9   0    2.61    1.85
   9  -9   0    4.12    2.24
   9   9   0    6.05    2.09
  -9   9   0    6.65    2.35
   9   9   0    3.86    2.18
  10  -9   0    3.98    2.38
  10   9   0    3.69    2.08
 -10   9   0    7.29    2.40
  11  -9   0   -0.20    2.18
  11   9   0   -0.27    1.87
   0  10   0  114.16    3.57
   0  10   0  109.63    3.17
   1  10   0   45.33    1.75
   1  10   0   45.33    2.39
  -1  10   0   45.58    2.14
  -1  10   0   45.68    2.06
   2  10   0   28.44    1.97
   2  10   0   29.01    2.29
   2  10   0   27.35    1.19
  -2  10   0   27.37    1.65
  -2  10   0   29.63    2.25
   3  10   0  190.78    5.48
   3  10   0  186.66    5.79
  -3  10   0  187.04    5.29
   4 -10   0   12.93    2.06
  -4  10   0   11.62    1.71
   4  10   0   11.55    1.79
   4  10   0   11.78    1.59
   5 -10   0   15.61    2.53
   5 -10   0   13.64    1.90
  -5  10   0   14.05    2.17
   5  10   0   10.71    1.77
   5  10   0   13.93    2.09
   6 -10   0   47.15    4.32
   6 -10   0   45.36    3.90
   6  10   0   41.09    3.21
   6  10   0   47.68    3.71
  -6  10   0   44.39    3.43
   7 -10   0    8.40    2.38
   7  10   0    5.34    1.74
  -7  10   0    5.92    1.99
   7  10   0    8.86    2.11
   8 -10   0   23.86    3.04
   8  10   0   20.34    2.58
  -8  10   0   28.62    2.94
   8  10   0   27.98    3.06
   9 -10   0   -0.56    2.00
   9  10   0    0.92    1.69
  -9  10   0   -2.16    1.96
   9  10   0   -0.06    1.95
  10 -10   0    3.82    2.42
 -10  10   0    7.35    2.52
  10  10   0   11.59    2.71
  10  10   0    8.18    2.38
  11 -10   0    3.57    2.55
  11  10   0    3.30    2.33
   0  11   0   -0.11    0.79
   0  11   0   -0.49    0.89
  -1  11   0    2.15    1.17
   1  11   0    1.38    0.85
   1  11   0    3.00    0.84
  -1  11   0    1.46    0.81
   2  11   0   19.90    1.81
  -2  11   0   22.05    1.90
  -2  11   0   21.73    1.55
   2  11   0   22.45    1.21
  -3  11   0   52.76    2.18
   3  11   0   45.66    2.69
   3  11   0   48.10    2.67
  -3  11   0   45.64    2.88
   4 -11   0   24.30    2.49
   4  11   0   21.23    2.00
  -4  11   0   25.34    2.30
   4  11   0   32.07    2.61
   5 -11   0   29.54    2.26
   5 -11   0   28.97    2.98
   5  11   0   32.42    2.57
   5  11   0   28.87    2.70
  -5  11   0   26.56    2.50
   6 -11   0  111.96    5.66
   6 -11   0  107.90    4.83
  -6  11   0  103.62    4.41
   6  11   0  101.69    5.05
   6  11   0  105.12    4.77
   7 -11   0   14.69    2.68
  -7  11   0   17.95    2.49
   7  11   0   11.05    2.28
   7  11   0   11.81    2.08
   8 -11   0    4.74    2.33
   8  11   0    4.58    2.01
   8  11   0    2.97    1.76
  -8  11   0    3.15    2.05
   9 -11   0    5.33    2.39
   9  11   0    4.05    2.10
  -9  11   0    6.03    2.30
   9  11   0    6.35    2.12
  10 -11   0    0.98    2.30
 -10  11   0    1.42    2.22
  10  11   0    4.29    2.13
  10  11   0    0.08    2.03
  11 -11   0   -1.06    2.33
  11  11   0    2.93    2.18
   0  12   0    4.89    1.04
   0  12   0    4.79    1.15
   1  12   0    0.35    0.94
   1  12   0    1.43    0.84
  -1  12   0    0.50    0.80
  -1  12   0    1.65    1.17
   2  12   0    7.47    0.87
  -2  12   0    6.79    1.04
  -2  12   0    7.45    1.44
   2  12   0    7.77    1.34
   3  12   0   15.40    1.66
  -3  12   0   13.45    1.27
  -3  12   0   16.18    1.93
   3  12   0   12.45    1.76
  -4  12   0   20.22    2.12
   4  12   0   17.12    1.87
   4  12   0   20.10    2.20
   5 -12   0    3.60    2.07
   5  12   0    3.27    1.39
   5  12   0    3.46    1.78
  -5  12   0    5.44    2.00
   6 -12   0    8.55    2.20
   6 -12   0    8.58    2.66
   6  12   0    8.76    2.13
   6  12   0    9.08    1.91
  -6  12   0    9.37    2.31
   7 -12   0   -1.52    2.03
   7  12   0    4.09    1.66
   7  12   0    3.17    1.86
  -7  12   0    0.99    1.88
   8 -12   0   12.43    2.71
  -8  12   0   13.11    2.55
   8  12   0    8.47    2.12
   8  12   0    8.89    2.37
   9 -12   0    0.41    2.17
   9  12   0   -0.18    1.88
   9  12   0   -0.43    1.61
  -9  12   0   -1.04    1.99
  10 -12   0    4.67    2.64
  10  12   0    6.31    2.25
 -10  12   0    5.33    2.50
  10  12   0   10.30    2.82
  11 -12   0    3.36    2.72
  11  12   0    9.20    2.60
   0  13   0   -0.88    0.85
   0  13   0    0.85    1.11
   1  13   0   27.15    2.29
   1  13   0   25.14    1.71
  -1  13   0   29.31    2.28
  -1  13   0   28.35    1.91
   2  13   0   91.61    2.60
   2  13   0   97.13    3.81
  -2  13   0   97.40    3.29
  -2  13   0   95.58    3.65
  -3  13   0    0.40    0.86
   3  13   0    0.81    1.08
   3  13   0    1.97    1.33
   3  13   0    0.18    0.46
  -3  13   0   -0.70    1.44
  -4  13   0   97.75    4.19
   4  13   0  100.41    4.57
   4  13   0   96.45    4.14
   5 -13   0    1.15    2.33
   5  13   0    1.00    1.36
   5  13   0   -0.40    1.65
  -5  13   0    2.97    2.00
   6 -13   0   29.07    3.34
   6  13   0   29.64    2.82
  -6  13   0   29.06    3.02
   6  13   0   27.99    2.88
   7 -13   0   10.77    2.59
  -7  13   0    7.45    2.25
   7  13   0   11.12    2.09
   7  13   0   10.33    2.22
   8 -13   0    4.21    2.22
   8  13   0    1.34    1.76
   8  13   0    1.61    1.96
  -8  13   0    0.51    2.05
   9 -13   0    2.94    2.22
   9  13   0    6.93    2.32
   9  13   0   10.08    2.37
  -9  13   0    4.18    2.38
  10 -13   0   -0.35    2.32
  10  13   0    0.45    1.86
  10  13   0   -1.84    2.19
 -10  13   0   -1.44    2.30
  11 -13   0   -1.95    2.30
  11  13   0    3.01    2.28
   0  14   0   52.86    2.47
   0  14   0   51.10    2.63
  -1  14   0   18.28    1.82
   1  14   0   17.10    1.42
  -1  14   0   15.09    1.50
   1  14   0   16.20    1.70
   2  14   0  119.49    4.41
   2  14   0  116.73    3.11
  -2  14   0  122.57    3.93
  -2  14   0  118.95    4.18
  -3  14   0  132.99    4.61
   3  14   0  129.33    2.98
  -3  14   0  133.34    4.12
   3  14   0  132.31    4.93
   4  14   0   10.39    2.01
   4  14   0   11.12    1.71
  -4  14   0   12.14    2.20
   5 -14   0    0.59    2.44
  -5  14   0    3.49    2.02
   5  14   0    1.18    1.80
   5  14   0   -0.46    1.34
   6 -14   0   10.37    2.75
   6  14   0    8.36    2.11
   6  14   0    9.37    1.92
  -6  14   0    9.43    2.36
   7 -14   0    1.82    2.31
   7  14   0    3.19    1.69
  -7  14   0    3.46    2.10
   7  14   0    0.13    1.81
   8 -14   0   11.31    2.84
  -8  14   0   10.12    2.52
   8  14   0   11.08    2.60
   8  14   0   15.51    2.49
   9 -14   0    1.75    2.35
   9  14   0    2.55    1.86
  -9  14   0    2.18    2.27
   9  14   0    0.78    2.07
  10 -14   0    1.06    2.44
 -10  14   0   -4.23    2.17
  10  14   0   -0.60    2.15
  10  14   0    1.17    1.93
  11 -14   0    1.25    2.53
  11  14   0    1.16    2.05
   0  15   0    0.61    1.12
   0  15   0    0.73    1.00
  -1  15   0   18.18    1.72
   1  15   0   16.55    1.46
  -1  15   0   17.37    1.81
   1  15   0   13.75    1.65
   2  15   0   43.74    2.81
  -2  15   0   41.11    2.26
   2  15   0   42.86    1.91
  -2  15   0   44.41    2.69
   3  15   0   25.87    1.31
  -3  15   0   22.38    2.35
   3  15   0   21.90    2.22
  -3  15   0   24.64    1.85
   4  15   0    0.67    1.61
  -4  15   0    1.79    1.89
   4  15   0    0.99    1.43
   5 -15   0   31.26    3.37
  -5  15   0   30.07    2.87
   5  15   0   38.63    3.73
   5  15   0   36.06    3.13
   6 -15   0    3.67    2.41
  -6  15   0    0.18    1.80
   6  15   0    0.27    1.37
   6  15   0   -0.64    1.48
   7 -15   0    1.90    2.14
   7  15   0    1.75    1.85
   7  15   0    1.87    1.63
  -7  15   0    1.14    2.04
   8 -15   0    0.60    2.12
  -8  15   0    1.40    2.15
   8  15   0    0.27    1.88
   8  15   0    2.44    1.85
   9 -15   0    0.74    2.31
  -9  15   0   -0.22    2.21
   9  15   0    1.31    2.11
   9  15   0    3.17    2.04
  10 -15   0    0.30    2.45
  10  15   0    0.53    2.19
  10  15   0    1.44    1.96
 -10  15   0   -2.77    2.19
  11 -15   0   -2.24    2.37
 -11  15   0    0.17    2.68
  11  15   0    0.08    1.94
   0  16   0    3.29    1.30
   0  16   0    4.99    1.27
  -1  16   0   20.75    1.90
  -1  16   0   24.34    2.06
   1  16   0   17.04    1.85
   1  16   0   24.22    1.96
  -2  16   0   34.26    2.25
   2  16   0   36.56    2.01
  -2  16   0   38.43    2.90
   2  16   0   37.61    2.91
  -3  16   0    0.59    1.58
   3  16   0    1.35    0.78
  -3  16   0    1.54    1.08
   3  16   0    1.97    1.54
   4  16   0   10.69    2.13
   4  16   0   16.77    2.16
  -4  16   0   14.67    2.38
   5 -16   0    7.35    2.86
  -5  16   0    7.72    2.36
   5  16   0    7.61    2.13
   5  16   0    6.22    1.86
   6 -16   0   13.87    2.85
   6  16   0    9.41    2.25
   6  16   0    9.46    1.96
  -6  16   0    9.01    2.39
   7 -16   0   16.70    3.11
  -7  16   0   18.49    2.81
   7  16   0   14.18    2.63
   7  16   0   15.09    2.32
   8 -16   0   12.73    3.03
   8  16   0   14.50    2.48
  -8  16   0   15.59    2.86
   8  16   0   16.40    2.86
   9 -16   0    1.14    2.29
   9  16   0    2.95    1.88
   9  16   0    2.51    2.22
  -9  16   0   -0.39    2.32
  10 -16   0   -0.25    2.58
  10  16   0    4.32    2.18
  10  16   0    5.28    2.47
 -10  16   0    0.12    2.61
   0  17   0    0.26    1.25
   0  17   0   -1.12    1.02
  -1  17   0    0.83    1.46
   1  17   0    1.79    1.33
  -1  17   0    1.67    1.08
   1  17   0    2.02    1.20
  -2  17   0    6.72    1.74
   2  17   0    8.03    1.76
  -2  17   0    7.07    1.32
   2  17   0    8.54    1.27
   3  17   0    9.95    1.08
  -3  17   0    8.65    1.38
  -3  17   0   10.89    2.06
   3  17   0   10.46    1.99
   4  17   0   24.75    2.70
  -4  17   0   24.13    2.80
  -4  17   0   27.25    2.17
   5 -17   0   13.78    3.11
   5  17   0   11.87    2.35
   5  17   0   11.43    2.10
  -5  17   0   13.62    2.58
   6 -17   0    4.68    2.32
   6  17   0    3.72    1.69
   6  17   0    2.03    1.85
  -6  17   0    0.13    2.07
   7 -17   0    8.58    2.80
   7  17   0    8.48    2.37
  -7  17   0    7.77    2.49
   7  17   0    9.37    2.14
   8 -17   0    5.16    2.71
   8  17   0    8.73    2.23
   8  17   0    5.20    2.26
  -8  17   0    4.13    2.38
   9 -17   0    1.10    2.31
   9  17   0    3.73    2.05
   9  17   0    4.15    2.38
  -9  17   0    2.87    2.47
  10 -17   0   -3.25    2.40
  10  17   0   -1.33    2.30
  10  17   0   -0.70    1.98
 -10  17   0   -1.66    2.40
   0  18   0    4.39    1.38
   0  18   0    4.46    1.49
  -1  18   0    4.84    1.68
  -1  18   0    2.60    1.19
   1  18   0    2.10    1.37
   1  18   0    2.52    1.34
  -2  18   0   13.87    2.21
   2  18   0   17.18    1.58
  -2  18   0   17.26    1.81
   2  18   0   15.51    2.01
   3  18   0   55.89    3.78
   3  18   0   48.06    2.07
  -3  18   0   49.85    3.67
  -3  18   0   50.57    2.69
   4  18   0    1.73    1.60
  -4  18   0    1.51    1.25
  -4  18   0    0.14    2.08
   5  18   0    6.78    2.07
   5  18   0    4.43    1.77
  -5  18   0    6.67    2.23
   6 -18   0   -0.37    2.23
   6  18   0   -0.05    1.49
   6  18   0   -0.70    1.75
  -6  18   0    1.84    1.99
   7 -18   0    0.17    2.43
  -7  18   0    0.31    2.15
   7  18   0   -1.65    1.74
   7  18   0    0.56    1.68
   8 -18   0    0.22    2.48
   8  18   0   -0.02    1.98
   8  18   0    1.52    1.91
  -8  18   0   -0.76    2.20
   9 -18   0    2.13    2.50
   9  18   0    1.78    2.30
   9  18   0    3.14    2.16
  -9  18   0    0.77    2.51
  10 -18   0   -1.28    2.58
 -10  18   0   -1.84    2.41
  10  18   0   -1.12    1.85
  10  18   0    0.34    2.38
   0  19   0   -0.17    1.27
   0  19   0    1.73    1.51
  -1  19   0   47.33    2.89
   1  19   0   46.74    3.03
   1  19   0   47.11    2.78
  -1  19   0   44.52    3.15
  -2  19   0   12.56    2.20
   2  19   0   10.45    1.97
   2  19   0    9.57    1.49
  -2  19   0    7.33    1.50
  -3  19   0    1.15    1.81
  -3  19   0    2.09    1.25
   3  19   0    1.87    1.49
   3  19   0    0.48    0.97
   4  19   0   31.97    3.10
  -4  19   0   31.95    2.41
  -4  19   0   43.21    3.68
  -5  19   0   16.87    2.65
   5  19   0   11.28    2.13
   6 -19   0   16.47    3.25
  -6  19   0   13.01    2.73
   6  19   0   17.19    2.51
   6  19   0   11.02    2.28
   7 -19   0   10.04    3.03
  -7  19   0   10.93    2.66
   7  19   0   10.93    2.53
   7  19   0    6.52    2.07
   8 -19   0    5.21    2.70
  -8  19   0    2.67    2.42
   8  19   0    7.76    2.46
   8  19   0    4.97    2.10
   9 -19   0    6.81    2.99
  -9  19   0    7.46    2.91
   9  19   0    8.24    2.67
   9  19   0    5.43    2.32
  10 -19   0   -0.57    2.64
 -10  19   0   -3.73    2.53
  10  19   0    0.10    2.41
  10  19   0    1.31    2.14
   0  20   0    1.99    1.43
   0  20   0    3.83    1.65
  -1  20   0    4.46    1.78
   1  20   0    0.48    1.46
  -1  20   0    1.12    1.24
   1  20   0    0.65    1.48
  -2  20   0   11.65    1.72
  -2  20   0   10.37    2.07
   2  20   0   11.32    1.61
   2  20   0    8.97    1.86
   3  20   0   14.82    2.38
  -3  20   0   14.56    1.75
  -3  20   0   18.53    2.64
  -4  20   0    6.03    2.11
   4  20   0    4.96    1.80
  -4  20   0    8.24    1.48
   5  20   0   46.98    4.00
  -5  20   0   44.46    3.67
   6 -20   0    9.23    3.08
  -6  20   0    8.08    2.56
   6  20   0    4.83    2.11
   7 -20   0    6.06    2.83
  -7  20   0    6.78    2.62
   7  20   0    8.59    2.25
   7  20   0    9.68    2.50
   8 -20   0   -0.75    2.34
   8  20   0    2.67    2.02
   8  20   0    4.94    2.31
  -8  20   0    4.66    2.53
   9 -20   0   -0.28    2.73
   9  20   0    2.95    2.20
   9  20   0    4.94    2.55
  -9  20   0    1.51    2.66
  10 -20   0    3.51    2.98
  10  20   0    8.66    2.88
  10  20   0    3.80    2.39
 -10  20   0    4.61    2.86
   0  21   0    2.41    1.69
   0  21   0    1.04    1.42
   1  21   0    4.56    1.75
  -1  21   0    8.66    1.69
  -1  21   0    4.77    1.88
   2  21   0    0.46    1.37
   2  21   0   -0.24    1.59
  -2  21   0   -1.08    1.21
  -2  21   0   -0.46    1.92
  -3  21   0   11.09    2.26
  -3  21   0    8.24    1.56
   3  21   0    8.51    2.02
  -4  21   0    3.81    1.97
  -4  21   0    3.86    1.28
   4  21   0    1.60    1.77
  -5  21   0   -0.42    2.10
   5  21   0   -0.12    1.54
   6 -21   0   -0.22    2.67
  -6  21   0   -1.06    2.14
   6  21   0    1.42    1.98
   7 -21   0    1.49    2.62
  -7  21   0    2.61    2.42
   7  21   0    3.41    1.97
   7  21   0    2.05    1.96
   8 -21   0   -2.25    2.58
   8  21   0    0.22    2.09
  -8  21   0   -1.57    2.32
   8  21   0   -0.80    1.90
   9 -21   0    2.94    2.71
  -9  21   0    4.84    2.88
   9  21   0    7.27    2.67
   9  21   0    5.21    2.57
  10 -21   0    0.30    2.77
  10  21   0    3.15    2.56
 -10  21   0   -0.29    2.69
  10  21   0    1.24    2.56
   0  22   0   14.00    2.16
   0  22   0   16.67    2.16
  -1  22   0    0.22    1.86
   1  22   0    5.41    1.75
   1  22   0    0.86    1.62
  -1  22   0    0.53    1.34
  -2  22   0    6.66    1.65
   2  22   0   10.22    1.69
   2  22   0    7.84    1.99
  -2  22   0   14.58    2.46
  -3  22   0    2.55    1.28
  -3  22   0    2.43    2.07
   3  22   0    2.40    1.75
   4  22   0    4.90    1.80
  -4  22   0    6.09    1.44
  -4  22   0    4.73    2.25
   5  22   0   13.95    2.59
  -5  22   0   13.13    2.76
   6 -22   0    1.27    2.79
  -6  22   0    1.43    2.27
   6  22   0    0.39    1.90
   7 -22   0   11.80    3.16
  -7  22   0   12.86    2.74
   7  22   0   13.62    2.81
   8 -22   0    5.54    2.82
  -8  22   0    4.96    2.72
   8  22   0    8.10    2.67
   9 -22   0   -5.69    2.52
   9  22   0   -2.66    2.14
  -9  22   0   -1.50    2.69
   9  22   0    0.09    2.31
   0  23   0    0.47    1.45
   0  23   0   -0.29    1.73
   1  23   0   38.25    3.03
   1  23   0   38.91    3.31
  -1  23   0   41.78    3.43
  -1  23   0   40.14    3.02
  -2  23   0   53.83    3.78
   2  23   0   50.71    2.91
  -2  23   0   53.42    3.28
   2  23   0   51.10    3.76
  -3  23   0    2.16    1.25
   3  23   0    1.60    1.68
  -3  23   0    0.81    1.83
  -4  23   0   33.85    3.24
  -4  23   0   36.46    2.61
   4  23   0   31.42    3.30
   5  23   0   10.41    2.38
  -5  23   0    5.99    2.27
   6 -23   0    6.72    3.06
   6  23   0    2.38    2.11
  -6  23   0    8.71    2.69
   7 -23   0   11.65    3.27
   7  23   0   13.63    2.92
  -7  23   0   12.40    2.76
   8 -23   0    7.65    3.23
   8  23   0    4.21    2.53
  -8  23   0   -0.12    2.63
   9 -23   0   -5.33    2.63
   9  23   0   -2.16    2.26
  -9  23   0   -3.17    2.66
   0  24   0   20.77    2.43
   0  24   0   20.53    2.44
  -1  24   0    5.89    2.07
  -1  24   0    5.87    1.71
   1  24   0    5.30    1.84
   1  24   0    6.61    1.91
  -2  24   0    3.68    1.41
   2  24   0    2.27    1.73
  -2  24   0    3.87    2.02
   2  24   0    0.64    1.43
  -3  24   0   -1.35    1.98
  -3  24   0   -0.38    1.15
   3  24   0    1.66    1.72
  -4  24   0    2.86    2.29
   4  24   0    6.54    1.95
   5  24   0   17.58    2.83
  -5  24   0   14.08    2.74
   6 -24   0   -1.37    2.81
  -6  24   0    0.62    2.38
   6  24   0    2.60    2.11
   7 -24   0   -6.97    2.53
   7  24   0    0.29    2.12
  -7  24   0   -2.68    2.27
   8 -24   0    0.51    2.95
  -8  24   0    1.29    2.70
   8  24   0    3.55    2.53
   9 -24   0    2.69    3.00
  -9  24   0    4.66    2.99
   9  24   0    3.98    2.57
   0  25   0   -0.61    1.58
   0  25   0   -0.03    1.40
  -1  25   0    0.73    1.88
  -1  25   0    2.24    1.45
   1  25   0    1.40    1.64
   1  25   0    1.63    1.68
  -2  25   0   -3.73    1.81
   2  25   0   -1.21    1.54
   2  25   0    0.48    1.43
  -2  25   0    0.46    1.35
  -3  25   0    4.92    2.23
   3  25   0    4.78    2.01
  -3  25   0    5.78    1.53
  -4  25   0   10.03    2.59
   4  25   0    7.37    2.23
   5  25   0    5.83    2.21
  -5  25   0    8.52    2.65
   6 -25   0   -5.75    2.58
   6  25   0   -0.78    1.82
  -6  25   0    0.19    2.37
   7 -25   0   -3.31    2.78
   7  25   0    0.46    2.18
  -7  25   0   -3.77    2.30
   8 -25   0   -3.05    2.80
   8  25   0    1.37    2.29
  -8  25   0    0.96    2.79
   9 -25   0   -1.40    2.85
  -9  25   0   -3.15    2.62
   9  25   0   -1.43    2.28
   0  26   0   13.57    2.24
   0  26   0    8.66    2.02
   1  26   0   14.01    2.12
  -1  26   0   12.47    2.02
   1  26   0   13.90    2.35
  -1  26   0   14.62    2.36
  -2  26   0   13.34    2.02
  -2  26   0   12.17    2.52
   2  26   0   11.80    2.33
  -3  26   0    5.28    1.55
  -3  26   0    4.74    2.34
   3  26   0    3.14    1.77
  -4  26   0    4.47    2.39
   4  26   0    4.03    2.14
   5  26   0   16.50    2.81
  -5  26   0   24.42    3.31
   6 -26   0    0.05    2.94
  -6  26   0    4.49    2.47
   6  26   0    2.01    2.15
   7 -26   0   -2.90    2.87
   7  26   0    3.06    2.33
  -7  26   0   -0.23    2.32
   8 -26   0   10.27    3.59
  -8  26   0   14.10    3.49
   8  26   0   13.71    3.14
   0  27   0   -0.20    1.43
   0  27   0    0.75    1.91
   1  27   0    9.88    2.15
  -1  27   0    9.84    2.27
   1  27   0    7.53    1.92
  -1  27   0    7.53    1.92
  -2  27   0    7.39    1.83
   2  27   0    7.20    2.14
  -2  27   0    6.94    2.34
  -3  27   0   -2.51    2.05
   3  27   0   -0.55    1.76
  -3  27   0    0.27    1.33
   4  27   0   15.20    2.59
  -4  27   0    6.66    2.40
  -5  27   0    1.19    2.41
   5  27   0    0.77    1.92
   6 -27   0   -3.22    2.91
   6  27   0   -0.05    2.03
  -6  27   0    0.41    2.48
   7 -27   0   -2.26    3.01
  -7  27   0    0.36    2.45
   7  27   0    2.23    2.30
   8 -27   0   -4.46    2.90
  -8  27   0   -3.80    2.70
   8  27   0    1.26    2.36
   0  28   0   -0.29    1.53
   0  28   0   -0.62    1.84
  -1  28   0    1.01    1.48
   1  28   0   -0.23    1.70
   1  28   0    0.17    1.75
  -1  28   0    0.79    1.94
   2  28   0    4.69    2.08
  -2  28   0    4.97    1.73
  -2  28   0    5.41    2.27
   3  28   0    4.23    2.10
  -3  28   0    2.53    2.30
  -3  28   0    7.16    1.71
   4  28   0    0.21    1.85
  -4  28   0   -1.67    2.31
  -5  28   0   -3.78    2.24
   5  28   0    0.73    1.99
   6 -28   0    0.35    2.81
  -6  28   0   -2.16    2.44
   6  28   0    2.56    2.24
   7 -28   0   -4.31    3.00
   7  28   0   -0.88    2.16
  -7  28   0    0.16    2.73
   8 -28   0   -4.35    2.94
  -8  28   0   -5.49    2.62
   8  28   0    3.61    2.56
   0  29   0   -3.23    1.82
   0  29   0    0.61    1.63
  -1  29   0    1.68    2.02
  -1  29   0    1.69    1.64
   1  29   0    2.67    1.85
   1  29   0   -1.45    1.80
  -2  29   0   10.14    2.05
  -2  29   0    8.71    2.52
   2  29   0   13.36    2.55
   3  29   0    0.05    1.78
  -3  29   0   -1.39    2.14
  -3  29   0    1.33    1.40
   4  29   0    6.40    2.36
  -4  29   0    2.90    2.47
  -5  29   0    2.29    2.55
   5  29   0    1.43    2.15
   6 -29   0   -5.37    3.00
   6  29   0   -0.71    2.10
  -6  29   0   -0.86    2.28
   7 -29   0    5.62    3.57
  -7  29   0    4.46    3.03
   7  29   0    3.87    2.59
   8 -29   0   -2.98    3.10
  -8  29   0   -4.33    2.70
   8  29   0   -1.79    2.16
   0  30   0    1.03    1.66
   0  30   0    2.07    2.07
   1  30   0    0.55    1.72
  -1  30   0    1.44    1.60
  -1  30   0   -1.47    1.99
  -2  30   0    0.70    2.09
  -2  30   0    0.63    1.51
   2  30   0    0.76    1.86
  -3  30   0    2.44    2.39
   3  30   0    0.99    1.74
  -4  30   0    0.82    2.44
   4  30   0    3.91    2.28
   5  30   0    6.74    2.33
  -5  30   0    8.76    3.00
   6 -30   0   -3.72    3.22
   6  30   0    2.32    2.35
  -6  30   0   -0.40    2.67
   7 -30   0   -4.69    3.05
  -7  30   0   -1.39    2.74
   7  30   0   -1.75    2.25
   0  31   0   -4.07    1.71
   0  31   0   -0.47    1.59
   1  31   0    9.82    2.35
  -1  31   0   11.88    2.55
  -1  31   0   13.26    2.30
  -2  31   0    0.47    1.44
  -2  31   0   -2.88    1.93
   2  31   0    0.39    1.80
  -3  31   0    5.55    2.58
   3  31   0    3.65    2.21
  -4  31   0   -0.75    2.45
   4  31   0   -0.47    1.92
   5  31   0   -1.09    2.05
  -5  31   0    3.18    2.80
   6 -31   0   -8.74    3.02
   6  31   0    2.79    2.47
  -6  31   0   -1.16    2.76
   7 -31   0   -0.04    3.01
  -7  31   0    0.23    2.59
   7  31   0    1.47    2.40
   0  32   0    1.53    1.82
   0  32   0   -0.38    1.97
  -1  32   0    1.93    1.79
   1  32   0    0.70    1.76
  -1  32   0    0.71    2.27
  -2  32   0    0.77    2.42
   2  32   0    1.94    1.91
  -2  32   0    3.94    1.82
   3  32   0   -0.20    2.01
  -3  32   0   -2.04    2.24
   4  32   0    6.49    2.52
  -4  32   0    7.50    2.90
  -5  32   0   -0.65    2.70
   5  32   0   -0.31    2.33
   6 -32   0   -1.79    3.42
   6  32   0    1.49    2.40
  -6  32   0    5.02    2.99
   0  33   0   -1.96    1.68
   0  33   0   -2.45    2.05
  -1  33   0   17.41    2.69
   1  33   0   16.81    2.86
  -1  33   0   15.95    3.02
  -2  33   0    6.47    2.07
   2  33   0    7.47    2.41
  -2  33   0    8.00    2.81
   3  33   0    4.50    2.29
  -3  33   0    2.85    2.72
   4  33   0   29.90    3.85
  -4  33   0   33.11    3.91
  -5  33   0   13.82    3.46
   5  33   0    6.66    2.66
   6 -33   0   -4.21    3.38
   6  33   0   -1.12    2.15
  -6  33   0   -6.25    2.65
   0  34   0    2.11    1.99
  -1  34   0    0.50    1.80
   1  34   0    2.32    1.97
  -1  34   0   -0.40    2.36
  -2  34   0    0.22    2.59
  -2  34   0    2.86    1.91
   2  34   0    0.95    1.95
   3  34   0    2.07    2.21
  -3  34   0   -0.12    2.51
   4  34   0    1.92    2.35
  -4  34   0   -1.42    2.68
  -5  34   0    4.19    3.11
   5  34   0    3.15    2.49
   0  35   0    0.80    1.81
  -1  35   0   -0.87    2.29
   1  35   0   -0.44    1.89
  -1  35   0    1.86    1.95
  -2  35   0   -1.80    2.38
   2  35   0    0.13    1.95
  -3  35   0    5.49    2.90
   3  35   0    8.66    2.67
   4  35   0    0.61    2.25
  -4  35   0   -2.32    2.76
   5  35   0    1.06    2.35
  -5  35   0   -3.76    2.73
   0  36   0    6.46    2.27
  -1  36   0    1.18    1.97
  -1  36   0   -3.01    2.22
   1  36   0   -0.38    1.90
   2  36   0    7.12    2.55
  -2  36   0    6.43    2.83
  -3  36   0    4.70    2.88
   3  36   0    4.74    2.50
  -4  36   0   -2.95    2.64
   4  36   0   -1.87    2.05
   0  37   0    1.21    1.91
   1  37   0    6.81    2.47
  -1  37   0    5.34    2.20
  -2  37   0    3.99    2.76
   2  37   0    7.69    2.54
  -3  37   0   -0.31    2.60
   3  37   0    3.54    2.32
   4  37   0    1.24    2.33
   0  38   0    3.34    2.23
  -1  38   0    3.33    2.01
   1  38   0    2.01    2.16
  -2  38   0   -0.45    2.51
   2  38   0    0.92    2.22
   3  38   0    4.52    2.54
   0  39   0   -0.65    1.90
   1  39   0    2.14    2.15
  12   0  -1   -2.27    1.99
  11   0  -1   -1.03    1.92
  10   0  -1   -1.69    1.65
   9   0  -1    1.25    1.77
   8   0  -1    0.43    1.36
   8   0  -1   -0.45    1.33
  -8   0   1   -0.20    1.33
  -7   0   1    2.07    1.45
   7   0  -1   -0.58    1.35
   7   0  -1   -0.44    1.58
  -6   0   1    2.59    1.31
   6   0  -1    1.24    1.46
   6   0  -1    0.55    1.21
  -5   0   1   -1.71    1.01
   5   0  -1   -0.03    1.16
   5   0  -1    0.91    0.98
   4   0  -1    0.11    0.80
  -4   0   1    0.28    0.90
   4   0  -1    0.64    0.99
   3   0  -1    0.32    0.86
   3   0  -1   -0.22    0.63
  -3   0   1   -1.95    0.89
  -2   0   1    3.15    0.86
   1   0  -1    0.31    0.35
  -1   0   1   -0.50    0.29
   1   0  -1   -0.07    0.27
   0   0  -1   -0.69    0.28
   1   0   1    0.19    0.73
   1   0   1    0.01    0.46
  -1   0  -1    0.16    0.45
  -2   0  -1   -0.33    0.75
   2   0   1    0.46    0.82
   2   0   1    2.07    1.36
   3   0   1   -0.77    0.81
   3   0   1    0.75    1.36
  -3   0  -1    0.12    0.73
   4   0   1    0.30    0.99
  -4   0  -1    0.45    0.88
   4   0   1    0.83    1.58
   5   0   1    0.99    1.30
   5   0   1    0.37    1.85
  -5   0  -1    1.17    1.01
  -6   0  -1   -0.02    1.18
   6   0   1    1.84    1.52
   6   0   1    0.29    2.04
   7   0   1    1.29    1.48
  -7   0  -1    1.05    1.28
   7   0   1    0.50    2.08
   8   0   1   -4.47    1.84
   8   0   1   -2.16    1.41
   9   0   1    1.06    1.76
  10   0   1   -2.57    1.62
  11   0   1   -0.87    2.06
  12  -1  -1    5.26    2.50
  12   1  -1    7.47    2.67
  11  -1  -1    0.29    1.98
  11   1  -1    0.68    2.01
  10  -1  -1   21.15    3.06
  10   1  -1   16.85    2.64
   9  -1  -1   25.35    2.89
   9   1  -1   28.00    3.08
   8  -1  -1    2.94    1.72
   8   1  -1    1.78    1.64
   8   1  -1    2.45    1.52
  -8   1   1    1.89    1.49
  -7  -1   1   80.25    3.27
   7  -1  -1   77.78    3.64
   7  -1  -1   82.68    4.30
   7   1  -1   80.01    4.39
   7   1  -1   83.27    3.84
  -7   1   1   77.41    3.52
   6  -1  -1   54.60    3.53
   6  -1  -1   49.65    2.84
  -6  -1   1   46.46    2.49
  -6   1   1   48.23    2.73
   6   1  -1   54.13    3.47
   6   1  -1   49.25    2.98
  -5  -1   1    0.43    1.05
   5  -1  -1    0.97    0.94
   5  -1  -1    0.67    1.10
   5   1  -1   -0.47    0.99
   5   1  -1    0.16    1.14
  -5   1   1    0.51    1.13
   4  -1  -1   29.16    2.31
   4  -1  -1   28.94    1.78
  -4  -1   1   28.32    1.61
   4   1  -1   31.17    2.22
   4   1  -1   34.26    1.95
  -4   1   1   29.64    1.86
  -3  -1   1    0.34    0.80
   3  -1  -1    0.50    0.61
   3  -1  -1    0.34    0.80
   3   1  -1   -0.07    0.69
   3   1  -1    0.61    0.85
  -3   1   1    0.50    1.00
   2  -1  -1   98.39    3.03
  -2  -1   1   94.27    2.42
   2  -1  -1   97.36    2.35
   2   1  -1   93.71    2.61
  -2   1   1   93.25    2.63
   2   1  -1   96.03    2.83
   1  -1  -1    0.27    0.24
   1  -1  -1   -0.02    0.37
  -1   1   1    0.22    0.38
  -1   1   1    0.09    0.22
   1   1  -1    0.06    0.34
   1   1  -1    0.31    0.37
   1   1  -1    0.22    0.37
   0  -1  -1  249.74    4.96
   0   1  -1  252.75    4.99
   0   1   1  241.93    5.49
  -1  -1  -1  110.36    2.51
   1  -1   1  105.62    2.80
   1   1   1  111.12    3.28
  -1   1  -1  108.73    2.65
   1   1   1  107.46    2.65
  -2  -1  -1    1.16    0.72
   2  -1   1    1.44    1.24
   2  -1   1    1.87    0.91
   2   1   1    3.15    1.37
   2   1   1    1.03    0.74
  -2   1  -1    1.16    0.83
  -3  -1  -1   60.04    2.07
   3  -1   1   59.67    2.64
   3  -1   1   57.38    3.15
  -3   1  -1   62.84    2.28
   3   1   1   59.25    2.55
   3   1   1   52.89    3.01
   4  -1   1    2.77    1.52
  -4  -1  -1    3.50    0.91
   4  -1   1    2.84    1.15
  -4   1  -1    3.76    1.06
   4   1   1    1.67    1.02
   4   1   1    2.25    1.53
   5  -1   1   96.97    4.66
   5  -1   1  101.79    4.15
  -5  -1  -1   92.97    3.15
  -5   1  -1   98.76    3.36
   5   1   1   96.38    4.38
   5   1   1   95.40    4.01
  -6  -1  -1   37.24    2.23
   6  -1   1   29.44    2.70
   6  -1   1   32.14    2.98
   6   1   1   30.98    3.00
  -6   1  -1   35.67    2.62
   6   1   1   38.17    3.09
  -7  -1  -1   -0.27    1.22
   7  -1   1    3.58    1.68
   7  -1   1   -2.84    2.08
   7   1   1   -0.29    2.03
  -7   1  -1    0.35    1.40
   7   1   1   -0.11    1.42
   8  -1   1    0.25    2.00
   8  -1   1    1.83    1.72
   8   1   1    0.72    2.03
   8   1   1    1.98    1.67
   9  -1   1   20.95    2.82
   9   1   1   16.41    2.59
  10  -1   1    2.55    2.03
  10   1   1   -1.11    1.79
  11  -1   1    5.46    2.36
  11   1   1    9.57    2.75
  12  -2  -1    4.50    2.43
  12   2  -1    2.38    2.27
  11  -2  -1    0.54    2.05
  11   2  -1   -0.97    1.89
  10  -2  -1    2.17    1.97
  10   2  -1    3.17    2.04
   9  -2  -1   42.32    3.89
   9   2  -1   43.82    3.77
   8  -2  -1    6.31    1.91
  -8   2   1    4.86    1.66
   8   2  -1    6.02    1.87
   8   2  -1    5.98    1.64
   7  -2  -1   15.12    2.23
  -7  -2   1   18.18    1.74
   7  -2  -1   16.71    1.86
   7   2  -1   15.81    1.96
   7   2  -1   15.16    2.32
  -7   2   1   17.22    2.06
   6  -2  -1   81.20    3.31
   6  -2  -1   87.37    4.35
  -6  -2   1   79.67    2.89
   6   2  -1   89.54    3.62
  -6   2   1   77.78    3.40
   6   2  -1   86.26    4.14
   5  -2  -1   18.50    1.47
  -5  -2   1   19.77    1.68
   5  -2  -1   18.59    1.93
   5   2  -1   16.11    1.77
   5   2  -1   17.60    1.59
  -5   2   1   18.51    1.74
  -4  -2   1    1.49    0.82
   4  -2  -1    2.47    0.84
   4  -2  -1    2.44    1.06
  -4   2   1    1.76    1.05
   4   2  -1    3.13    1.03
   4   2  -1    2.20    0.88
   3  -2  -1    3.58    1.07
  -3  -2   1    1.84    0.81
   3  -2  -1    2.84    0.66
   3   2  -1    1.15    0.86
  -3   2   1    3.15    1.05
   3   2  -1    2.54    0.79
   2  -2  -1    5.42    1.08
  -2  -2   1    2.77    0.72
   2   2  -1    4.80    0.80
   1  -2  -1  847.78   18.08
  -1   2   1  890.41   16.93
   1   2  -1  897.86   18.19
   1   2  -1  899.24   16.82
   1   2  -1  902.49   18.73
  -1   2   1  881.93   18.44
   0  -2  -1  306.04    6.02
   0   2  -1  303.44    6.05
   0   2   1  298.28    6.70
   0   2  -1  305.07    6.74
  -1  -2  -1    1.76    0.49
   1   2   1    0.07    0.95
   1   2   1    1.38    0.45
  -1   2  -1    2.13    0.67
   2  -2   1   33.99    2.07
   2  -2   1   26.78    2.27
  -2  -2  -1   28.10    1.32
   2   2   1   32.24    1.75
  -2   2  -1   27.54    1.67
   2   2   1   31.92    2.64
  -3  -2  -1  132.65    3.22
   3  -2   1  135.31    4.24
   3  -2   1  130.42    4.08
   3   2   1  127.03    4.41
  -3   2  -1  130.00    3.62
   3   2   1  129.90    3.89
   4  -2   1   10.17    1.73
  -4  -2  -1   10.50    1.07
   4  -2   1   11.99    1.58
  -4   2  -1   10.35    1.34
   4   2   1    9.85    1.86
   4   2   1   11.88    1.42
   5  -2   1   64.29    4.03
   5  -2   1   62.21    3.43
  -5  -2  -1   57.45    2.39
   5   2   1   54.52    3.13
   5   2   1   68.04    4.03
  -5   2  -1   54.10    2.63
  -6  -2  -1   17.02    1.57
   6  -2   1   13.83    2.16
   6  -2   1   15.84    2.58
   6   2   1   14.51    2.02
   6   2   1   15.66    2.44
  -6   2  -1   14.96    1.82
   7  -2   1   13.42    2.55
   7  -2   1   13.43    2.24
  -7  -2  -1   15.07    1.60
   7   2   1   12.63    2.49
  -7   2  -1   13.98    1.88
   7   2   1   12.40    2.06
   8  -2   1   -1.46    2.09
   8  -2   1    0.78    1.72
   8   2   1    2.11    2.13
  -8   2  -1    2.46    1.59
   8   2   1    5.01    1.82
   9  -2   1    0.39    1.78
   9   2   1   -1.10    2.05
   9   2   1    0.31    1.76
  10  -2   1    1.26    1.99
  10   2   1    1.42    1.99
  11  -2   1   -0.29    2.21
  11   2   1    1.38    2.10
  12  -3  -1    3.79    2.39
  12   3  -1    1.68    2.16
  11  -3  -1   -1.54    1.88
  11   3  -1    1.12    1.99
  10  -3  -1   -0.53    1.80
  10   3  -1   -0.67    1.72
   9  -3  -1    3.04    1.97
   9   3  -1    3.91    1.93
   8  -3  -1    0.60    1.66
   8   3  -1   -0.20    1.35
  -8   3   1   -0.51    1.51
   8   3  -1    0.64    1.42
   7  -3  -1   56.64    4.05
  -7  -3   1   45.08    2.51
   7  -3  -1   51.69    3.08
   7   3  -1   52.13    3.51
   7   3  -1   45.51    3.27
  -7   3   1   51.84    3.17
   6  -3  -1   33.65    3.01
   6  -3  -1   32.70    2.49
  -6  -3   1   35.06    2.06
   6   3  -1   37.26    2.76
  -6   3   1   32.22    2.60
   6   3  -1   34.08    2.73
   5  -3  -1    1.11    1.31
  -5  -3   1    1.55    0.94
   5  -3  -1    0.04    0.94
  -5   3   1    1.22    1.23
   5   3  -1    2.10    1.17
   5   3  -1    0.61    1.04
  -4  -3   1    1.34    0.75
   4  -3  -1    1.32    1.13
   4  -3  -1    0.84    0.77
   4   3  -1    1.79    0.86
  -4   3   1    1.08    1.08
   4   3  -1    2.57    1.02
  -3  -3   1   -0.50    0.69
   3  -3  -1    0.70    0.59
   3  -3  -1    0.19    0.98
   3   3  -1    0.44    0.79
   3   3  -1    0.21    0.73
  -3   3   1   -0.04    1.03
   2  -3  -1  144.62    4.09
  -2  -3   1  143.33    3.09
   2   3  -1  144.58    3.85
  -2   3   1  142.09    3.79
   2   3  -1  139.42    3.78
   1   3  -1    5.84    0.63
   1   3  -1    6.78    0.71
  -1   3   1    8.18    0.65
  -1   3   1    6.83    0.76
   1   3  -1    7.35    0.54
   0   3  -1  226.75    5.32
   0   3  -1  224.90    4.75
   0   3   1  237.21    4.70
  -1  -3  -1   57.25    1.59
   1   3   1   58.00    2.65
   1   3   1   58.42    1.79
  -1   3  -1   58.08    2.06
  -2  -3  -1    1.71    0.58
   2  -3   1    2.85    1.12
  -2   3  -1    1.34    0.88
   2   3   1    1.42    0.68
   2   3   1    2.94    1.36
  -3  -3  -1   55.31    1.79
   3  -3   1   57.88    2.75
   3  -3   1   63.96    2.85
  -3   3  -1   61.79    2.38
   3   3   1   58.98    2.47
   3   3   1   58.90    3.07
  -4  -3  -1   -0.11    0.68
   4  -3   1   -0.28    1.17
   4  -3   1    2.30    1.58
   4   3   1   -0.26    1.44
  -4   3  -1    1.90    1.08
   4   3   1   -1.34    0.84
   5  -3   1    3.33    1.53
  -5  -3  -1    1.31    0.89
   5  -3   1   -0.28    1.86
  -5   3  -1    3.22    1.35
   5   3   1    1.10    1.23
   5   3   1   -0.42    1.78
  -6  -3  -1    4.00    1.14
   6  -3   1    4.77    1.85
   6  -3   1    2.66    2.20
   6   3   1    5.08    1.59
  -6   3  -1    5.14    1.61
   6   3   1    6.15    2.21
   7  -3   1    7.39    1.98
   7  -3   1    7.11    2.35
   7   3   1    4.91    1.68
   7   3   1    5.55    2.23
  -7   3  -1    5.05    1.65
   8  -3   1    2.57    1.86
   8  -3   1    1.59    2.18
  -8   3  -1    1.64    1.57
   8   3   1    1.95    1.67
   8   3   1    3.16    2.14
   9  -3   1   -2.20    1.59
   9   3   1   -1.16    1.95
   9   3   1    0.13    1.71
  10  -3   1   -1.56    1.80
  10   3   1    2.02    2.09
  11  -3   1    0.85    2.19
  11   3   1    1.20    2.21
  12  -4  -1   -0.84    2.09
  12   4  -1    0.94    2.21
  11  -4  -1    0.56    2.06
  11   4  -1    0.14    1.94
  10  -4  -1    1.10    1.94
  10   4  -1    1.80    1.89
   9  -4  -1   16.89    2.80
   9   4  -1   16.94    2.61
  -9   4   1   17.19    2.36
   8  -4  -1   29.82    3.16
  -8   4   1   37.00    2.84
   8   4  -1   37.45    3.46
   8   4  -1   36.60    3.20
  -7  -4   1   33.13    2.17
   7  -4  -1   33.08    3.09
   7  -4  -1   33.24    2.77
   7   4  -1   30.59    2.89
   7   4  -1   39.96    3.28
  -7   4   1   35.45    3.05
   6  -4  -1   79.82    4.19
   6  -4  -1   70.72    3.18
  -6  -4   1   67.64    2.53
  -6   4   1   75.32    3.57
   6   4  -1   73.83    3.59
   6   4  -1   74.77    3.74
  -5  -4   1   16.12    1.40
   5  -4  -1   16.76    1.36
   5  -4  -1   18.81    1.95
   5   4  -1   16.02    1.82
   5   4  -1   17.68    1.72
  -5   4   1   16.99    1.82
   4  -4  -1    4.75    0.88
   4  -4  -1    5.38    1.26
  -4  -4   1    4.98    0.78
   4   4  -1    4.87    1.10
   4   4  -1    5.52    1.20
  -4   4   1    5.88    1.29
  -3  -4   1   61.89    1.73
   3  -4  -1   61.60    2.87
   3  -4  -1   64.34    1.90
  -3   4   1   63.66    2.37
   3   4  -1   61.38    2.45
   3   4  -1   62.62    2.67
   2  -4  -1   71.37    2.72
   2   4  -1   68.92    2.45
   2   4  -1   68.13    2.45
   2   4  -1   68.64    1.72
  -2   4   1   69.10    2.79
   1   4  -1    0.59    0.64
   1   4  -1    1.33    0.48
  -1   4   1    0.50    0.70
  -1   4   1    1.68    0.42
   1   4  -1    0.59    0.55
   0   4   1    4.49    0.63
   0   4  -1    4.01    0.64
   0   4  -1    6.04    0.70
   0   4   1    4.33    0.71
  -1  -4  -1   64.37    1.79
   1   4   1   68.56    2.94
  -1   4  -1   67.43    2.41
   1   4   1   70.24    2.10
  -1   4  -1   67.50    2.28
  -2  -4  -1  113.19    2.56
   2  -4   1  110.52    3.69
   2   4   1  109.09    3.83
  -2   4  -1  111.81    3.25
   2   4   1  110.55    3.25
   3  -4   1    4.34    1.30
   3  -4   1    3.51    1.22
  -3  -4  -1    3.60    0.61
  -3   4  -1    3.69    1.05
   3   4   1    5.32    1.38
   3   4   1    2.52    0.90
  -4  -4  -1   -0.42    0.59
   4  -4   1    0.61    1.28
   4  -4   1   -0.08    1.48
   4   4   1   -0.24    0.94
   4   4   1    0.08    1.44
  -4   4  -1   -0.10    1.17
   5  -4   1   -0.06    1.98
   5  -4   1    2.95    1.53
  -5  -4  -1    2.33    0.85
   5   4   1    3.80    1.87
  -5   4  -1    2.41    1.41
   5   4   1    1.13    1.16
   6  -4   1   -0.41    2.13
   6  -4   1    0.62    1.69
  -6  -4  -1   -0.11    0.93
   6   4   1    2.42    2.12
  -6   4  -1    2.58    1.59
   6   4   1   -0.24    1.30
   7  -4   1    1.04    1.72
   7  -4   1   -3.44    2.11
   7   4   1    1.10    1.91
  -7   4  -1    2.14    1.64
   7   4   1    0.79    1.47
   8  -4   1   -1.36    2.01
   8  -4   1    3.17    1.89
   8   4   1   -1.18    1.51
  -8   4  -1   -2.61    1.42
   8   4   1   -1.86    1.89
   9  -4   1    2.25    1.90
   9   4   1   -0.87    2.05
   9   4   1    3.01    1.83
  10  -4   1   12.42    2.73
  10   4   1    9.82    2.55
  11  -4   1    0.67    2.19
  11   4   1    1.06    2.03
  12  -5  -1    4.05    2.48
  12   5  -1    7.60    2.64
  11  -5  -1    2.12    2.15
  11   5  -1    4.92    2.25
  10  -5  -1    7.20    2.18
  10   5  -1    6.09    2.14
   9  -5  -1   12.66    2.46
   9   5  -1   18.59    2.42
   9   5  -1   15.99    2.46
  -9   5   1   17.87    2.48
   8  -5  -1    7.55    2.20
  -8   5   1    8.09    1.99
   8   5  -1    5.58    1.77
   8   5  -1    7.78    1.98
   7  -5  -1    4.52    1.45
   7  -5  -1    3.44    1.83
  -7   5   1    5.11    1.96
   7   5  -1    6.12    1.69
   7   5  -1    4.84    1.82
  -6  -5   1   28.02    1.72
   6  -5  -1   26.21    2.69
   6  -5  -1   27.39    2.36
   6   5  -1   40.31    2.81
  -6   5   1   29.96    2.49
   6   5  -1   23.38    2.39
   5  -5  -1    8.13    1.16
  -5  -5   1    9.11    0.90
   5  -5  -1    8.74    1.62
   5   5  -1    8.45    1.40
  -5   5   1    9.24    1.63
   5   5  -1    8.06    1.51
  -4  -5   1   13.33    0.86
   4  -5  -1   11.29    1.65
   4  -5  -1   10.37    1.04
  -4   5   1   10.18    1.52
   4   5  -1   10.76    1.35
   4   5  -1    9.95    1.31
   3  -5  -1    3.07    0.68
   3  -5  -1    4.46    1.24
  -3  -5   1    2.76    0.57
   3   5  -1    4.46    0.99
   3   5  -1    2.78    0.94
  -3   5   1    2.51    1.16
   2  -5  -1   38.20    2.49
   2   5  -1   31.40    1.07
   2   5  -1   34.14    1.88
  -2   5   1   28.77    1.96
   2   5  -1   32.31    1.84
  -2   5   1   30.89    1.03
   1   5  -1  365.27    7.30
   1   5  -1  379.77    8.49
  -1   5   1  356.31    7.66
  -1   5   1  369.68    8.01
   0   5  -1  350.07    7.35
   0   5   1  376.26    7.27
   0   5  -1  350.60    8.21
  -1   5  -1    4.79    0.91
  -1   5  -1    6.97    1.15
   1   5   1    2.57    0.77
   1   5   1    4.22    0.78
   1   5   1    5.54    1.22
  -2  -5  -1    2.88    0.52
   2   5   1    2.16    1.21
  -2   5  -1    5.00    1.02
   2   5   1    3.48    0.81
   3  -5   1  274.64    7.16
  -3  -5  -1  274.19    5.60
   3   5   1  276.28    6.87
  -3   5  -1  274.89    6.42
   3   5   1  276.56    7.44
   4  -5   1  128.98    4.52
  -4  -5  -1  130.57    3.11
   4  -5   1  132.44    4.54
   4   5   1  127.93    4.30
  -4   5  -1  127.02    3.99
   4   5   1  125.39    4.80
   5  -5   1   19.01    2.23
  -5  -5  -1   19.27    1.39
   5  -5   1   17.15    2.28
  -5   5  -1   19.89    2.00
   5   5   1   20.13    2.02
   5   5   1   18.52    2.35
   6  -5   1   36.92    3.26
   6  -5   1   43.80    3.70
  -6  -5  -1   43.83    1.99
   6   5   1   42.26    3.25
  -6   5  -1   42.83    2.95
   6   5   1   47.02    4.19
   7  -5   1    1.64    1.79
   7  -5   1    0.71    2.23
   7   5   1   -0.50    1.31
  -7   5  -1   -1.40    1.55
   7   5   1   -1.22    1.94
   8  -5   1   11.58    2.41
   8   5   1   12.47    2.41
   8   5   1   10.67    2.16
  -8   5  -1   15.00    2.13
   9  -5   1   12.65    2.53
   9   5   1   10.33    2.33
   9   5   1   11.78    2.57
  10  -5   1    2.40    2.24
  10   5   1    3.28    1.97
  11  -5   1    6.49    2.57
  11   5   1    4.78    2.24
  12  -6  -1   -0.40    2.17
  12   6  -1    0.93    2.09
  11  -6  -1   -0.14    2.04
  11   6  -1    4.34    2.23
  10  -6  -1    8.94    2.46
  10   6  -1    5.57    2.05
   9  -6  -1   -1.02    1.91
  -9   6   1    0.22    1.91
   9   6  -1   -1.07    1.72
   9   6  -1   -0.83    1.58
   8  -6  -1    3.20    1.98
  -8   6   1    4.31    1.89
   8   6  -1    0.69    1.55
   8   6  -1    1.26    1.58
   7  -6  -1   20.69    2.75
   7   6  -1   23.38    2.45
   7   6  -1   19.98    2.39
  -7   6   1   18.10    2.37
   6  -6  -1   17.91    2.47
   6  -6  -1   18.01    1.61
  -6  -6   1   18.06    1.18
   6   6  -1   16.98    2.15
   6   6  -1   17.81    2.07
  -6   6   1   22.62    2.36
   5  -6  -1   -0.10    1.00
  -5  -6   1   -0.83    0.60
   5  -6  -1    0.33    1.33
   5   6  -1    0.43    1.12
   5   6  -1    1.43    1.17
  -5   6   1    0.64    1.45
  -4  -6   1   11.64    0.88
   4  -6  -1   12.62    1.09
   4  -6  -1   11.14    1.72
  -4   6   1   11.43    1.63
   4   6  -1   10.71    1.45
   4   6  -1   13.82    1.48
  -3  -6   1   51.61    1.37
   3  -6  -1   56.89    2.86
   3   6  -1   52.91    2.49
   3   6  -1   56.09    2.50
  -3   6   1   55.45    2.55
   2   6  -1   77.07    2.79
   2   6  -1   75.94    2.70
  -2   6   1   78.19    2.01
   2   6  -1   76.79    1.84
  -2   6   1   73.96    2.74
  -1   6   1   34.27    1.55
   1   6  -1   34.26    1.75
   1   6  -1   33.28    1.41
  -1   6   1   27.78    2.18
   0   6  -1  239.78    5.98
   0   6   1  266.08    6.04
   0   6  -1  232.91    5.33
   0   6   1  247.81    5.33
  -1   6  -1    1.91    0.96
   1   6   1    1.89    0.75
   1   6   1    2.83    0.73
   1   6   1    3.39    1.08
  -1   6  -1    1.20    0.81
  -2  -6  -1   22.87    0.97
   2   6   1   22.64    2.01
   2   6   1   20.45    1.56
  -2   6  -1   21.66    1.87
   3  -6   1   15.49    1.80
  -3  -6  -1   16.90    0.90
   3   6   1   13.36    1.33
  -3   6  -1   16.66    1.61
   3   6   1   14.02    1.75
  -4  -6  -1   24.69    1.17
   4  -6   1   23.72    2.12
   4  -6   1   24.05    2.24
   4   6   1   25.75    2.32
  -4   6  -1   25.87    2.22
   4   6   1   20.50    1.80
   5  -6   1    8.24    1.99
  -5  -6  -1    7.28    0.84
   5  -6   1    6.69    2.03
   5   6   1    5.52    1.47
   5   6   1    9.25    2.03
  -5   6  -1    7.51    1.70
   6  -6   1    5.06    2.00
   6  -6   1    5.93    2.30
   6   6   1    5.77    2.14
   6   6   1    2.77    1.52
  -6   6  -1    5.13    1.80
   7  -6   1   -2.04    1.96
   7  -6   1   -0.19    1.73
   7   6   1    1.06    1.42
   7   6   1   -1.22    1.78
  -7   6  -1   -1.73    1.45
   8  -6   1    0.17    1.86
  -8   6  -1    0.62    1.63
   8   6   1   -0.43    1.51
   8   6   1    0.04    1.89
   9  -6   1   -1.20    1.83
   9   6   1    0.38    1.63
  -9   6  -1    0.52    1.80
   9   6   1    2.04    2.18
  10  -6   1    2.59    2.18
  10   6   1    1.38    1.81
  11  -6   1   -0.96    2.22
  11   6   1    4.67    2.31
  12  -7  -1    1.95    2.34
  12   7  -1    2.70    2.23
  11  -7  -1    1.18    2.16
  11   7  -1    1.92    2.04
  10  -7  -1    1.01    2.02
  10   7  -1    1.04    1.81
   9  -7  -1   11.71    2.45
   9   7  -1   12.21    2.30
   9   7  -1    9.24    2.28
  -9   7   1   15.80    2.56
   8  -7  -1   -0.30    1.67
   8   7  -1   -1.24    1.46
   8   7  -1    0.09    1.58
  -8   7   1    1.25    1.77
   7  -7  -1    0.62    1.95
   7   7  -1    3.28    1.71
   7   7  -1    3.18    1.73
  -7   7   1    2.97    1.89
   6  -7  -1    6.52    1.37
   6  -7  -1    7.35    2.10
   6   7  -1    5.66    1.64
   6   7  -1    7.74    1.77
  -6   7   1    7.50    2.02
   5  -7  -1    0.61    1.58
   5  -7  -1   -0.09    1.04
   5   7  -1    0.41    1.15
   5   7  -1    0.14    1.16
  -5   7   1    0.67    1.51
   4  -7  -1   81.01    3.82
   4  -7  -1   76.64    2.56
   4   7  -1   73.81    3.26
  -4   7   1   73.80    3.22
   4   7  -1   74.78    3.28
   3  -7  -1    0.46    1.15
   3   7  -1   -0.55    0.87
  -3   7   1    1.26    1.07
   3   7  -1    0.68    0.86
  -2   7   1    1.67    1.12
   2   7  -1    0.75    0.86
   2   7  -1    0.70    0.46
   2   7  -1    0.10    0.71
  -2   7   1    0.19    0.48
  -1   7   1   -0.15    1.17
   1   7  -1    1.54    0.70
   1   7  -1   -0.65    0.81
  -1   7   1    1.35    0.66
   0   7  -1  169.43    4.26
   0   7   1  188.33    4.72
   0   7  -1  170.71    4.70
   0   7   1  182.48    4.19
  -1   7  -1  280.44    6.35
   1   7   1  277.23    5.84
   1   7   1  283.72    7.16
  -1   7  -1  294.22    6.89
   2   7   1  130.62    4.20
  -2   7  -1  124.63    3.64
   2   7   1  128.63    2.84
   2   7   1  132.27    3.76
  -3  -7  -1    6.18    0.56
   3  -7   1    4.26    1.40
   3   7   1    5.17    1.03
  -3   7  -1    6.03    1.23
   3   7   1    4.93    1.47
   4  -7   1   19.04    1.94
  -4  -7  -1   17.96    0.96
   4  -7   1   16.33    2.06
   4   7   1   17.72    1.68
   4   7   1   22.34    2.23
  -4   7  -1   16.34    1.85
   5  -7   1   -0.65    1.87
   5  -7   1    1.06    1.74
  -5  -7  -1    0.26    0.57
   5   7   1   -0.39    1.08
   5   7   1    0.00    1.75
  -5   7  -1   -0.61    1.46
   6  -7   1    0.37    1.93
   6  -7   1    2.32    2.33
   6   7   1    0.62    1.95
   6   7   1    1.27    1.43
  -6   7  -1    3.10    1.77
   7  -7   1    2.52    1.93
   7  -7   1    1.03    2.27
   7   7   1    3.32    1.95
  -7   7  -1    5.16    1.77
   7   7   1    4.88    1.65
   8  -7   1    2.20    2.03
  -8   7  -1    1.47    1.76
   8   7   1    2.13    2.15
   8   7   1    1.65    1.63
   9  -7   1   -0.79    1.91
   9   7   1   -2.48    1.77
   9   7   1    2.46    1.78
  -9   7  -1   -1.23    1.75
  10  -7   1    0.14    2.09
  10   7   1   -0.77    1.70
  11  -7   1   -1.84    2.09
  11   7   1    0.98    1.96
  11  -8  -1    6.00    2.59
  11   8  -1    8.15    2.49
  10  -8  -1   -0.09    2.01
  10   8  -1    1.62    1.87
 -10   8   1   -0.37    1.94
   9  -8  -1    7.31    2.42
  -9   8   1   13.10    2.49
   9   8  -1    9.31    2.17
   9   8  -1   13.86    2.53
   8  -8  -1    8.48    2.33
   8   8  -1    6.39    1.95
   8   8  -1    6.09    1.89
  -8   8   1    7.86    2.08
   7  -8  -1    4.43    2.10
  -7   8   1    5.99    2.04
   7   8  -1    5.95    1.84
   7   8  -1    6.08    1.89
   6  -8  -1    5.70    2.11
   6  -8  -1    4.13    1.29
   6   8  -1    5.05    1.66
  -6   8   1    7.62    2.06
   6   8  -1    6.40    1.75
   5  -8  -1   17.29    1.47
   5  -8  -1   17.37    2.27
  -5   8   1   16.16    2.14
   5   8  -1   17.46    1.95
   5   8  -1   16.89    1.92
   4  -8  -1   10.78    1.06
   4  -8  -1   15.12    1.97
   4   8  -1   10.62    1.51
  -4   8   1   13.59    1.84
   4   8  -1   10.54    1.41
   3  -8  -1  172.00    5.29
   3   8  -1  165.82    4.91
  -3   8   1  160.18    4.51
   3   8  -1  167.13    4.92
  -2   8   1  116.10    3.60
   2   8  -1  123.72    3.79
   2   8  -1  117.12    3.83
  -2   8   1  117.74    3.05
   2   8  -1  112.94    2.66
   1   8  -1  265.85    5.67
  -1   8   1  267.00    6.29
  -1   8   1  266.84    6.14
   1   8  -1  267.69    6.77
   0   8   1  198.08    4.55
   0   8   1  200.32    5.10
   0   8  -1  188.61    5.12
   0   8  -1  185.64    4.56
   1   8   1    7.78    0.93
  -1   8  -1    8.27    1.16
  -1   8  -1    9.03    1.06
   1   8   1    6.68    1.23
   2   8   1  173.03    5.18
  -2   8  -1  167.78    4.58
   2   8   1  165.51    3.58
  -2   8  -1  166.39    4.51
   2   8   1  161.56    4.52
  -3   8  -1   25.91    2.22
   3   8   1   19.97    2.01
   3   8   1   24.08    1.85
   3   8   1   23.08    0.98
   4  -8   1   -1.12    1.59
  -4   8  -1    0.10    1.34
   4   8   1    1.66    1.55
   4   8   1    0.95    1.00
   5  -8   1    0.62    1.89
   5  -8   1    0.88    1.91
   5   8   1   -0.07    1.76
  -5   8  -1    0.84    1.62
   5   8   1    0.17    1.14
   6  -8   1   18.52    2.67
   6  -8   1   20.41    2.69
  -6   8  -1   18.50    2.42
   6   8   1   16.45    2.14
   6   8   1   17.13    2.55
   7  -8   1   -1.36    2.15
   7  -8   1    0.42    1.85
   7   8   1   -0.79    1.81
   7   8   1   -0.19    1.36
  -7   8  -1   -0.48    1.62
   8  -8   1   15.56    2.52
   8   8   1   12.16    2.53
   8   8   1    9.98    2.06
  -8   8  -1   13.99    2.40
   9  -8   1   -0.03    2.02
   9   8   1    0.80    1.65
  -9   8  -1    1.06    1.90
   9   8   1    0.86    2.08
  10  -8   1    9.76    2.70
  10   8   1   12.74    2.92
  10   8   1    9.39    2.49
  11  -8   1    0.75    2.25
  11   8   1    1.70    2.06
  11  -9  -1   -0.07    2.18
  11   9  -1    0.10    2.05
  10  -9  -1    7.76    2.58
  10   9  -1   14.97    2.74
 -10   9   1    9.31    2.43
   9  -9  -1    3.42    2.27
   9   9  -1    5.11    1.98
   9   9  -1    5.85    1.95
  -9   9   1    7.56    2.24
   8  -9  -1    1.26    2.00
   8   9  -1   -0.22    1.67
   8   9  -1    0.37    1.54
  -8   9   1   -1.15    1.77
   7  -9  -1   16.80    2.67
   7   9  -1   14.31    2.18
   7   9  -1   13.85    2.19
  -7   9   1   14.31    2.37
   6  -9  -1   10.88    2.23
   6  -9  -1    8.71    1.53
   6   9  -1   10.91    1.97
   6   9  -1    9.36    1.85
  -6   9   1   10.86    2.08
   5  -9  -1    4.00    1.76
   5  -9  -1    1.61    1.20
  -5   9   1    4.26    1.82
   5   9  -1    2.34    1.21
   5   9  -1    2.90    1.48
   4  -9  -1    5.43    1.75
  -4   9   1    5.27    1.52
   4   9  -1    3.87    1.27
   4   9  -1    4.37    1.25
  -3   9   1   27.77    1.28
   3   9  -1   23.46    1.86
   3   9  -1   26.85    2.16
  -3   9   1   30.13    2.40
   2   9  -1   18.03    1.59
   2   9  -1   18.62    1.07
  -2   9   1   15.94    1.54
  -2   9   1   16.92    1.16
   2   9  -1   21.59    1.92
   1   9  -1  120.37    3.06
  -1   9   1  117.42    3.41
  -1   9   1  114.13    3.40
   1   9  -1  122.32    3.84
   0   9  -1    1.68    0.85
   0   9   1    1.07    1.03
   0   9   1    1.04    0.86
   0   9  -1    1.00    0.90
   1   9   1    2.91    0.99
  -1   9  -1    4.87    0.97
  -1   9  -1    4.61    1.16
   1   9   1    4.81    0.88
  -2   9  -1   31.23    1.85
   2   9   1   28.66    1.30
   2   9   1   27.85    1.90
   2   9   1   32.40    2.50
  -2   9  -1   33.63    2.14
  -3   9  -1   72.61    3.13
   3   9   1   71.16    2.98
   3   9   1   76.64    3.66
   4  -9   1   43.93    3.76
  -4   9  -1   41.44    2.86
   4   9   1   48.88    3.14
   4   9   1   47.17    2.65
   5  -9   1    2.89    1.99
   5  -9   1    1.60    1.83
   5   9   1    3.66    1.87
   5   9   1    1.61    1.26
  -5   9  -1    2.87    1.76
   6  -9   1   92.39    4.85
   6  -9   1   95.66    5.24
   6   9   1   93.02    4.40
  -6   9  -1   98.06    4.34
   6   9   1   96.18    5.08
   7  -9   1   -1.37    2.18
   7  -9   1    2.87    2.04
   7   9   1    3.35    1.97
  -7   9  -1    2.19    1.85
   7   9   1    2.26    1.56
   8  -9   1   30.68    3.45
  -8   9  -1   34.00    3.10
   8   9   1   37.60    3.40
   8   9   1   46.03    3.98
   9  -9   1   21.95    3.18
   9   9   1   26.28    3.31
  -9   9  -1   30.21    3.04
   9   9   1   26.12    3.07
  10  -9   1   -0.29    2.20
  10   9   1   -1.55    2.29
  10   9   1    1.29    2.00
  11  -9   1    2.23    2.44
  11   9   1    5.52    2.37
  11 -10  -1    4.41    2.49
  11  10  -1    2.26    2.16
  10 -10  -1    5.03    2.27
 -10  10   1    2.61    2.39
  10  10  -1    7.33    2.29
   9 -10  -1    0.85    2.08
  -9  10   1   -2.68    1.83
   9  10  -1    1.07    1.84
   9  10  -1    0.45    1.66
   8 -10  -1    5.42    2.32
  -8  10   1    3.03    1.98
   8  10  -1    3.39    1.75
   8  10  -1    5.06    1.70
   7 -10  -1    6.58    2.32
  -7  10   1    6.22    2.07
   7  10  -1    8.33    1.93
   7  10  -1    4.99    1.63
   6 -10  -1   56.06    4.07
  -6  10   1   51.69    3.70
   6  10  -1   54.59    3.59
   6  10  -1   55.06    3.89
   5 -10  -1    3.41    2.01
   5 -10  -1    0.72    1.26
   5  10  -1   -0.32    1.24
  -5  10   1    2.10    1.83
   5  10  -1    0.17    1.36
   4 -10  -1   54.63    3.88
   4  10  -1   55.70    2.88
  -4  10   1   56.83    3.21
   4  10  -1   54.26    3.12
   3  10  -1    0.31    0.84
   3  10  -1   -0.09    0.99
  -3  10   1   -1.23    0.56
  -3  10   1    1.58    1.41
   3  10  -1    0.38    0.38
  -2  10   1    1.85    0.64
  -2  10   1    1.01    1.08
   2  10  -1    1.17    0.58
   2  10  -1    0.92    0.85
  -1  10   1   83.71    2.77
   1  10  -1   79.71    2.40
  -1  10   1   77.87    2.94
   1  10  -1   82.22    3.04
   0  10   1    7.49    1.10
   0  10  -1    6.47    1.12
   0  10  -1    5.34    1.03
   0  10   1    6.59    1.15
   1  10   1    1.37    0.99
   1  10   1    1.14    0.88
  -1  10  -1    1.64    1.06
  -1  10  -1    0.08    0.84
  -2  10  -1    3.38    1.17
   2  10   1    1.92    0.91
   2  10   1    3.17    1.19
  -2  10  -1    3.47    0.99
   2  10   1    2.35    0.75
   3  10   1   10.91    1.77
   3  10   1   14.05    1.44
  -3  10  -1   15.58    1.71
   4 -10   1   11.07    2.08
  -4  10  -1   11.22    1.88
   4  10   1    7.06    1.87
   4  10   1    9.63    1.48
   5 -10   1   17.83    2.66
   5 -10   1   13.61    2.17
   5  10   1   14.66    1.89
   5  10   1   15.87    2.45
  -5  10  -1   22.09    2.44
   6 -10   1    5.35    2.49
   6 -10   1    3.82    2.20
   6  10   1    0.59    1.43
  -6  10  -1    1.73    1.95
   6  10   1    3.35    2.00
   7 -10   1    4.90    2.22
  -7  10  -1    3.48    1.90
   7  10   1    1.92    1.52
   7  10   1    4.92    2.04
   8 -10   1    0.09    2.09
   8  10   1    2.95    1.79
  -8  10  -1    0.84    1.86
   8  10   1    1.24    2.10
   9 -10   1    0.51    2.13
  -9  10  -1    1.15    2.07
   9  10   1    0.97    2.00
   9  10   1    1.26    1.77
  10 -10   1   11.83    2.87
  10  10   1   14.83    2.75
  10  10   1   10.69    2.97
  11 -10   1    0.71    2.44
  11  10   1    6.84    2.38
  11 -11  -1    0.84    2.40
  11  11  -1   -2.64    1.78
  10 -11  -1    5.07    2.52
 -10  11   1    8.55    2.67
  10  11  -1    8.56    2.40
  10  11  -1    4.14    2.14
   9 -11  -1    3.06    2.24
  -9  11   1    4.64    2.24
   9  11  -1    4.71    2.05
   9  11  -1    3.66    1.93
   8 -11  -1    0.51    2.08
   8  11  -1    2.30    1.75
   8  11  -1    5.65    1.89
  -8  11   1    0.55    1.95
   7 -11  -1   37.58    3.57
  -7  11   1   46.62    3.42
   7  11  -1   47.98    3.63
   7  11  -1   38.19    3.37
   6 -11  -1   16.61    2.74
   6  11  -1   12.42    2.14
   6  11  -1   11.04    2.07
  -6  11   1   14.13    2.35
   5 -11  -1   69.64    2.92
   5 -11  -1   68.59    4.48
  -5  11   1   61.79    3.79
   5  11  -1   59.09    3.70
   5  11  -1   69.29    3.70
   4 -11  -1   93.72    4.72
   4  11  -1   90.45    3.88
  -4  11   1   86.55    3.67
   4  11  -1   96.92    4.04
   3  11  -1    5.56    1.25
   3  11  -1    7.66    0.60
  -3  11   1    5.26    1.61
   3  11  -1    5.51    1.29
  -3  11   1    8.21    0.88
   2  11  -1    7.76    1.31
   2  11  -1    8.71    0.87
  -2  11   1    8.44    1.40
  -2  11   1    8.66    0.94
   1  11  -1   63.59    2.26
  -1  11   1   60.88    2.66
  -1  11   1   63.64    2.39
   1  11  -1   64.06    2.81
   0  11  -1   15.77    1.40
   0  11   1   14.93    1.42
   0  11   1   16.56    1.43
   0  11  -1   11.59    1.34
   1  11   1   71.09    2.41
  -1  11  -1   76.71    2.78
  -1  11  -1   73.87    2.86
   1  11   1   74.24    3.02
   2  11   1   13.35    1.63
   2  11   1   17.17    1.46
  -2  11  -1   19.38    1.63
  -2  11  -1   19.25    1.84
   3  11   1  131.46    4.36
  -3  11  -1  127.44    4.35
   3  11   1  130.77    4.93
   4 -11   1   68.99    4.07
   4  11   1   65.73    3.21
  -4  11  -1   64.49    3.22
   4  11   1   61.65    3.88
   5 -11   1    8.15    2.21
   5  11   1    5.55    2.04
   5  11   1    5.27    1.55
  -5  11  -1    7.23    1.91
   6 -11   1   -1.38    2.15
   6 -11   1   -0.62    2.20
   6  11   1    1.75    1.88
   6  11   1   -0.36    1.33
  -6  11  -1    2.26    1.92
   7 -11   1    1.40    2.09
   7  11   1    1.86    1.55
  -7  11  -1   -0.25    1.78
   7  11   1    0.71    1.88
   8 -11   1    0.90    2.19
   8  11   1    8.52    2.32
   8  11   1    5.72    1.82
  -8  11  -1    2.45    2.01
   9 -11   1    2.22    2.04
  -9  11  -1    2.14    2.17
   9  11   1    3.69    1.91
   9  11   1    3.38    2.26
  10 -11   1   -0.36    2.27
  10  11   1    1.94    1.98
 -10  11  -1   -3.31    1.95
  10  11   1   -0.68    2.35
  11 -11   1    3.35    2.72
  11  11   1    3.60    2.12
  11 -12  -1   -0.64    2.38
  11  12  -1    3.61    2.33
  10 -12  -1    1.59    2.34
 -10  12   1   -3.04    2.06
  10  12  -1   -0.16    1.81
  10  12  -1    1.88    1.93
   9 -12  -1    6.01    2.30
  -9  12   1    4.99    2.32
   9  12  -1    6.89    2.09
   9  12  -1    6.11    2.07
   8 -12  -1    7.19    2.52
  -8  12   1    7.62    2.31
   8  12  -1    6.96    2.06
   8  12  -1    8.78    2.15
   7 -12  -1    7.45    2.39
   7  12  -1    9.51    2.07
  -7  12   1    6.63    2.17
   7  12  -1    7.67    1.88
   6 -12  -1   28.18    3.22
   6  12  -1   23.46    2.56
   6  12  -1   23.82    2.65
  -6  12   1   24.50    2.88
   5 -12  -1   26.04    2.92
   5  12  -1   27.88    2.61
  -5  12   1   31.38    2.92
   5  12  -1   28.27    2.71
   4 -12  -1   30.47    2.89
  -4  12   1   30.05    2.65
   4  12  -1   31.80    2.81
   4  12  -1   35.59    2.63
   3  12  -1  195.39    6.03
  -3  12   1  194.28    4.90
   3  12  -1  190.65    4.06
  -3  12   1  186.47    5.39
   3  12  -1  192.78    5.83
   2  12  -1    4.83    0.82
  -2  12   1    4.85    0.87
   2  12  -1    3.40    1.17
  -2  12   1    2.95    1.41
   1  12  -1   30.68    2.12
   1  12  -1   31.61    1.82
  -1  12   1   25.74    2.17
  -1  12   1   31.91    1.87
   0  12   1   23.06    1.97
   0  12  -1   22.30    1.82
   0  12  -1   19.39    1.57
   0  12   1   22.53    1.95
   1  12   1    0.18    1.05
   1  12   1    0.65    0.92
  -1  12  -1    0.33    1.11
  -1  12  -1   -1.03    0.81
   2  12   1  142.70    3.52
   2  12   1  140.89    4.93
  -2  12  -1  150.21    4.52
  -2  12  -1  150.28    4.55
   3  12   1   66.00    1.87
   3  12   1   67.74    3.44
   3  12   1   72.03    3.18
  -3  12  -1   73.90    3.35
  -4  12  -1    3.61    1.65
   4  12   1    2.01    1.21
   4  12   1    4.85    1.82
   5 -12   1   38.52    3.53
   5  12   1   39.96    2.96
   5  12   1   43.07    3.78
  -5  12  -1   41.45    3.39
   6 -12   1   14.03    2.39
   6 -12   1   12.02    2.66
  -6  12  -1   13.06    2.37
   6  12   1   10.13    1.88
   6  12   1   10.63    2.33
   7 -12   1   22.80    3.10
   7  12   1   22.67    2.82
  -7  12  -1   23.08    2.82
   7  12   1   20.34    2.49
   8 -12   1    2.31    2.29
   8  12   1    2.85    1.70
  -8  12  -1    1.95    2.04
   8  12   1   -0.05    1.86
   9 -12   1    0.25    2.24
   9  12   1    0.71    1.71
  -9  12  -1   -2.50    2.15
   9  12   1    0.43    2.19
  10 -12   1    1.74    2.47
 -10  12  -1   -0.84    2.27
  10  12   1   -1.18    2.08
  10  12   1    2.28    2.05
  11 -12   1   -2.58    2.22
  11  12   1    1.86    2.01
  11 -13  -1   -0.81    2.14
  11  13  -1   -1.74    2.01
  10 -13  -1    0.49    2.41
 -10  13   1   -2.78    2.21
  10  13  -1    0.70    2.07
  10  13  -1    3.22    2.11
   9 -13  -1   -0.33    2.18
  -9  13   1    0.22    2.11
   9  13  -1    2.36    1.82
   9  13  -1   -0.14    1.85
   8 -13  -1   -0.20    2.17
  -8  13   1   -0.76    2.02
   8  13  -1   -1.47    1.62
   8  13  -1    0.81    1.66
   7 -13  -1    3.67    2.31
   7  13  -1    2.50    1.68
   7  13  -1    3.54    1.58
  -7  13   1    1.08    1.97
   6 -13  -1   16.17    2.91
  -6  13   1   25.43    2.99
   6  13  -1   22.45    2.59
   6  13  -1   15.93    2.21
   5 -13  -1   21.34    2.97
   5  13  -1   16.77    2.13
  -5  13   1   17.02    2.64
   5  13  -1   14.88    2.17
   4  13  -1   -0.46    1.21
  -4  13   1   -1.41    1.62
   4  13  -1    1.95    1.30
  -3  13   1   24.96    1.56
   3  13  -1   20.85    2.07
   3  13  -1   23.34    1.20
  -3  13   1   20.15    2.06
   3  13  -1   20.72    1.98
  -2  13   1    2.66    1.43
  -2  13   1   -0.14    0.73
   2  13  -1    0.10    1.03
   2  13  -1    0.02    0.73
   1  13  -1   14.89    1.33
  -1  13   1   12.98    1.34
  -1  13   1   13.67    1.65
   1  13  -1   13.02    1.54
   0  13   1    1.15    0.97
   0  13  -1    1.24    1.10
   0  13  -1    0.47    0.85
   0  13   1   -0.16    1.08
  -1  13  -1   31.90    2.09
   1  13   1   30.24    1.89
   1  13   1   33.34    2.33
  -1  13  -1   32.43    2.32
   2  13   1   62.85    3.36
   2  13   1   57.03    2.17
  -2  13  -1   60.74    2.77
  -2  13  -1   61.40    3.07
  -3  13  -1    5.67    1.68
   3  13   1    2.20    1.49
  -3  13  -1    4.72    1.19
   3  13   1    4.03    1.28
   3  13   1    4.75    0.78
  -4  13  -1   13.36    2.08
   4  13   1   12.02    2.10
   4  13   1   12.64    1.76
   5 -13   1   27.56    3.32
  -5  13  -1   37.45    3.14
   5  13   1   31.26    2.74
   5  13   1   28.79    2.88
   6 -13   1    4.62    2.19
   6 -13   1    6.51    2.40
   6  13   1    2.33    1.91
   6  13   1    5.34    1.64
  -6  13  -1    3.10    2.00
   7 -13   1    1.48    2.24
   7  13   1    0.95    1.87
   7  13   1    1.62    1.54
  -7  13  -1    2.50    2.06
   8 -13   1   -0.12    2.18
  -8  13  -1   -0.17    1.92
   8  13   1   -3.09    1.88
   8  13   1    0.41    1.57
   9 -13   1   -1.20    2.23
   9  13   1    0.27    2.27
   9  13   1    0.70    1.77
  -9  13  -1   -2.77    2.02
  10 -13   1    2.05    2.45
 -10  13  -1   -1.62    2.19
  10  13   1    2.10    2.05
  10  13   1   -1.42    2.19
  11 -14  -1    5.43    2.81
  11  14  -1    8.29    2.64
 -11  14   1    4.62    2.84
  10 -14  -1    1.52    2.22
  10  14  -1    1.42    2.00
 -10  14   1   -1.68    2.29
  10  14  -1    2.03    2.12
   9 -14  -1   -0.08    2.19
   9  14  -1    1.30    1.96
  -9  14   1    1.58    2.21
   9  14  -1    0.98    1.82
   8 -14  -1    6.74    2.43
   8  14  -1   10.29    2.27
  -8  14   1    6.01    2.39
   8  14  -1    8.06    2.12
   7 -14  -1   12.52    2.74
  -7  14   1   13.29    2.51
   7  14  -1   15.06    2.37
   7  14  -1   14.74    2.35
   6 -14  -1   -0.18    2.32
  -6  14   1    2.39    2.22
   6  14  -1    0.68    1.66
   6  14  -1    1.23    1.52
   5 -14  -1   25.33    3.19
   5  14  -1   21.36    2.45
   5  14  -1   27.94    2.60
  -5  14   1   21.96    2.82
  -4  14   1    6.90    1.09
   4  14  -1    8.16    1.76
   4  14  -1    6.61    1.53
  -4  14   1   10.91    2.28
   3  14  -1    7.98    1.64
   3  14  -1   11.05    0.87
  -3  14   1    9.71    1.86
  -3  14   1   10.35    1.15
  -2  14   1   10.37    1.71
   2  14  -1   10.75    1.52
   2  14  -1   11.97    1.14
  -2  14   1   11.22    1.22
  -1  14   1   33.49    2.39
  -1  14   1   30.20    1.93
   1  14  -1   25.94    2.20
   1  14  -1   31.34    2.00
   0  14  -1   63.57    3.02
   0  14  -1   66.49    2.83
   0  14   1   75.98    3.25
   0  14   1   66.28    2.76
   1  14   1    9.38    1.28
  -1  14  -1    9.15    1.36
  -1  14  -1    8.54    1.44
   1  14   1    9.11    1.44
   2  14   1   59.68    2.29
  -2  14  -1   65.39    3.23
  -2  14  -1   60.48    2.76
   2  14   1   65.53    3.32
   3  14   1    0.80    0.78
   3  14   1    0.50    1.34
  -3  14  -1    2.34    1.65
  -3  14  -1    2.71    1.15
   4  14   1   56.02    3.25
  -4  14  -1   60.84    3.44
   4  14   1   55.52    3.89
   5 -14   1   18.81    3.19
   5  14   1   14.41    2.49
  -5  14  -1   20.00    2.69
   5  14   1   11.78    1.96
   6 -14   1   22.84    3.19
   6 -14   1   29.84    2.79
  -6  14  -1   22.79    2.80
   6  14   1   25.15    2.94
   6  14   1   30.65    2.84
   7 -14   1   70.67    4.98
  -7  14  -1   67.41    4.21
   7  14   1   69.11    4.81
   7  14   1   67.47    4.18
   8 -14   1   31.52    3.68
   8  14   1   28.98    3.41
  -8  14  -1   28.90    3.22
   8  14   1   30.87    3.15
   9 -14   1    1.44    2.40
   9  14   1    3.70    1.96
  -9  14  -1    0.74    2.22
   9  14   1    1.75    2.22
  10 -14   1   12.04    3.12
 -10  14  -1   17.05    3.12
  10  14   1   12.93    3.09
  10  14   1   12.55    2.73
  11 -15  -1   -3.40    2.28
 -11  15   1   -0.62    2.49
  11  15  -1    2.06    2.12
  10 -15  -1    5.55    2.78
  10  15  -1    5.57    2.34
 -10  15   1    2.42    2.57
  10  15  -1    5.12    2.44
   9 -15  -1   10.97    2.89
  -9  15   1   10.66    2.72
   9  15  -1   10.27    2.45
   9  15  -1    8.93    2.39
   8 -15  -1    0.55    2.31
  -8  15   1    2.31    2.25
   8  15  -1    1.91    1.81
   8  15  -1    3.94    1.93
   7 -15  -1   12.54    2.79
   7  15  -1   12.18    2.27
   7  15  -1   11.79    2.23
  -7  15   1   10.86    2.32
   6 -15  -1    4.56    2.25
   6  15  -1    5.00    1.70
  -6  15   1    3.92    2.24
   6  15  -1    3.16    1.70
   5 -15  -1    6.59    2.66
   5  15  -1    3.68    1.78
  -5  15   1    8.81    2.28
   5  15  -1    4.12    1.73
   4  15  -1   20.18    2.26
  -4  15   1   22.00    1.74
   4  15  -1   21.22    2.39
  -4  15   1   23.57    2.68
  -3  15   1   21.19    2.35
   3  15  -1   19.49    2.10
  -3  15   1   20.65    1.64
   3  15  -1   21.71    1.36
  -2  15   1  115.84    3.75
   2  15  -1  108.34    4.42
  -2  15   1  122.06    4.31
   2  15  -1  112.48    3.23
   1  15  -1    3.85    1.27
  -1  15   1    4.96    1.53
  -1  15   1    3.80    1.12
   1  15  -1    4.64    1.13
   0  15   1   11.03    1.55
   0  15  -1   11.15    1.52
   0  15   1   15.22    1.64
   0  15  -1   14.50    1.65
  -1  15  -1   58.49    2.94
  -1  15  -1   56.38    2.82
   1  15   1   57.94    2.51
   1  15   1   58.90    3.24
  -2  15  -1   22.47    2.05
  -2  15  -1   22.46    2.10
   2  15   1   27.61    1.90
   2  15   1   22.18    2.20
   3  15   1    9.99    1.92
  -3  15  -1    5.98    1.36
   3  15   1    7.51    0.97
  -3  15  -1    8.07    1.83
   4  15   1    5.36    1.94
   4  15   1    5.48    1.55
  -4  15  -1    3.70    1.85
   5 -15   1    0.60    2.61
   5  15   1    0.00    1.44
  -5  15  -1    0.89    2.08
   5  15   1    0.23    1.87
   6 -15   1   30.29    3.40
   6  15   1   31.33    2.90
  -6  15  -1   30.58    3.09
   6  15   1   30.75    3.21
   7 -15   1    4.41    2.37
   7  15   1    6.55    2.30
  -7  15  -1    7.99    2.43
   7  15   1    5.37    1.79
   8 -15   1    4.31    2.53
   8  15   1    3.55    1.80
   8  15   1    0.47    2.11
  -8  15  -1    3.41    2.20
   9 -15   1    3.46    2.62
   9  15   1    2.30    2.35
   9  15   1    2.32    1.85
  -9  15  -1    2.04    2.32
  10 -15   1    3.38    2.74
  10  15   1   -2.87    2.18
  10  15   1    2.08    2.05
 -10  15  -1   -0.52    2.45
  11 -16  -1   -0.37    2.54
  11  16  -1    0.04    2.06
 -11  16   1   -0.11    2.68
  10 -16  -1   -0.97    2.39
  10  16  -1    1.47    2.03
 -10  16   1   -2.72    2.42
  10  16  -1    1.63    2.11
   9 -16  -1    0.60    2.37
   9  16  -1    2.37    2.03
  -9  16   1    2.18    2.34
   9  16  -1    1.58    1.87
   8 -16  -1   -2.12    2.25
   8  16  -1   -0.83    1.43
   8  16  -1   -1.57    1.77
  -8  16   1   -1.83    2.14
   7 -16  -1   11.22    2.81
   7  16  -1    8.64    1.91
   7  16  -1   10.79    2.33
  -7  16   1    9.32    2.48
   6 -16  -1    5.10    2.47
   6  16  -1    5.55    1.79
   6  16  -1    6.02    1.89
  -6  16   1    4.78    2.23
   5 -16  -1    6.91    2.75
   5  16  -1    3.01    1.68
   5  16  -1    1.08    1.54
  -5  16   1    4.20    2.35
  -4  16   1   18.47    2.48
  -4  16   1   13.88    1.37
   4  16  -1   13.96    2.12
  -3  16   1   85.73    3.90
   3  16  -1   79.94    2.42
   3  16  -1   78.47    3.98
  -3  16   1   79.40    3.03
   2  16  -1    1.49    1.32
   2  16  -1    2.82    1.03
  -2  16   1    3.66    1.66
  -2  16   1    1.82    0.95
   1  16  -1    1.57    1.11
  -1  16   1    1.50    1.49
   1  16  -1    1.59    1.22
  -1  16   1    0.77    1.06
   0  16  -1    2.21    1.18
   0  16   1    1.10    1.14
   0  16  -1    1.97    1.34
   0  16   1    1.44    1.31
   1  16   1   18.68    2.02
  -1  16  -1   21.18    1.96
  -1  16  -1   19.24    1.85
   1  16   1   21.70    1.75
  -2  16  -1   -0.19    1.55
   2  16   1    1.96    1.12
   2  16   1    0.30    1.43
  -2  16  -1    2.21    1.18
   3  16   1    9.05    1.05
   3  16   1    9.86    1.99
  -3  16  -1    5.68    2.01
  -3  16  -1    9.81    1.53
   4  16   1    8.02    2.13
  -4  16  -1    8.29    2.26
   5 -16   1    3.76    2.64
  -5  16  -1    0.86    2.05
   5  16   1   -0.18    1.35
   5  16   1    0.44    1.85
   6 -16   1   -2.08    2.18
   6  16   1   -1.95    1.29
   6  16   1   -0.41    1.83
  -6  16  -1    1.38    1.99
   7 -16   1   -2.04    2.28
  -7  16  -1    0.00    2.09
   7  16   1   -1.25    1.36
   7  16   1   -1.68    1.94
   8 -16   1   -1.08    2.29
  -8  16  -1   -3.42    1.91
   8  16   1    0.23    1.57
   8  16   1   -1.94    1.87
   9 -16   1   -1.03    2.42
   9  16   1   -0.53    2.18
   9  16   1    2.01    1.81
  -9  16  -1   -2.79    2.07
  10 -16   1   -1.25    2.47
 -10  16  -1   -6.62    2.11
  10  16   1   -2.68    2.22
  10  16   1    2.23    2.10
  11 -17  -1   -3.33    2.40
  11  17  -1   -2.55    1.90
 -11  17   1   -4.74    2.50
  10 -17  -1    0.99    2.64
  10  17  -1   -2.14    2.16
 -10  17   1   -1.37    2.44
  10  17  -1    2.39    2.21
   9 -17  -1    8.40    2.91
   9  17  -1   16.65    2.84
  -9  17   1   12.15    2.90
   9  17  -1    8.53    2.64
   8 -17  -1    3.27    2.30
   8  17  -1    2.15    2.07
   8  17  -1    7.82    2.10
  -8  17   1    2.48    2.32
   7 -17  -1    5.17    2.65
   7  17  -1    5.20    2.11
   7  17  -1    6.23    1.99
  -7  17   1    4.77    2.36
   6 -17  -1   -1.73    2.22
   6  17  -1    0.70    1.59
   6  17  -1    0.67    1.63
  -6  17   1   -0.91    2.03
   5 -17  -1   12.37    2.80
   5  17  -1   12.47    2.22
   5  17  -1   11.15    2.12
  -5  17   1    9.74    2.62
  -4  17   1   11.30    1.36
   4  17  -1   13.18    2.07
  -4  17   1   18.71    2.72
   3  17  -1   10.43    1.11
   3  17  -1    7.90    1.82
  -3  17   1    9.53    1.32
  -3  17   1    9.64    2.13
  -2  17   1   96.77    4.23
   2  17  -1   94.64    3.17
   2  17  -1   95.59    4.30
  -2  17   1   92.96    3.55
   1  17  -1   23.56    2.05
  -1  17   1   25.16    2.29
  -1  17   1   26.85    2.13
   1  17  -1   17.91    2.05
   0  17   1   11.99    1.77
   0  17   1    9.50    1.60
   0  17  -1   11.90    1.70
   0  17  -1   15.54    1.82
   1  17   1    9.89    1.60
  -1  17  -1    9.40    1.54
  -1  17  -1   12.14    1.88
   1  17   1   12.66    1.79
   2  17   1   16.09    2.18
   2  17   1   17.88    1.63
  -2  17  -1   18.05    2.25
  -2  17  -1   14.36    1.79
   3  17   1   13.29    1.22
  -3  17  -1   14.01    1.72
  -3  17  -1   15.21    2.24
   3  17   1   14.45    2.25
   4  17   1    6.29    1.95
  -4  17  -1   11.57    2.27
   5 -17   1    5.13    2.69
   5  17   1    0.22    1.78
   5  17   1    4.09    1.64
  -5  17  -1    3.54    1.97
   6 -17   1    3.10    2.28
   6  17   1    4.59    1.72
   6  17   1   -0.19    1.88
  -6  17  -1    3.01    1.95
   7 -17   1   -1.49    2.38
  -7  17  -1    0.21    2.19
   7  17   1   -0.33    1.63
   7  17   1    0.24    2.05
   8 -17   1    2.45    2.58
   8  17   1    2.85    1.77
  -8  17  -1    2.93    2.27
   8  17   1    3.41    2.33
   9 -17   1   -0.45    2.55
   9  17   1    2.38    2.03
  -9  17  -1   -2.76    2.24
   9  17   1   -0.72    2.32
  10 -17   1   -3.60    2.45
  10  17   1    0.21    2.40
  10  17   1   -0.06    1.98
 -10  17  -1   -1.33    2.38
  10 -18  -1   12.32    3.26
  10  18  -1   15.99    2.98
  10  18  -1   15.11    2.91
 -10  18   1   11.71    3.15
   9 -18  -1    3.37    2.71
   9  18  -1    1.95    2.01
   9  18  -1    0.71    2.02
  -9  18   1    3.17    2.61
   8 -18  -1    6.03    2.56
   8  18  -1   10.30    2.47
   8  18  -1    5.62    2.13
  -8  18   1    9.63    2.68
   7 -18  -1   -1.54    2.12
   7  18  -1    1.41    1.66
  -7  18   1   -0.85    2.14
   7  18  -1   -0.12    1.69
   6 -18  -1    9.76    2.85
  -6  18   1   10.32    2.52
   6  18  -1    6.74    2.09
   6  18  -1   11.91    2.23
   5 -18  -1   18.25    3.01
   5  18  -1   21.37    2.62
  -5  18   1   21.44    2.78
   5  18  -1   13.91    2.29
  -4  18   1    1.40    2.22
  -4  18   1    0.76    1.01
   4  18  -1    1.49    1.48
   3  18  -1   17.42    2.27
  -3  18   1   20.02    1.93
  -3  18   1   18.64    2.65
   3  18  -1   22.66    1.70
  -2  18   1   18.90    2.29
  -2  18   1   17.59    1.75
   2  18  -1   18.83    2.14
   2  18  -1   18.09    1.64
   1  18  -1    5.03    1.49
   1  18  -1    2.19    1.33
  -1  18   1    4.03    1.26
  -1  18   1    5.58    1.85
   0  18  -1    1.10    1.45
   0  18  -1   -0.97    1.17
   0  18   1    1.65    1.62
   0  18   1    1.08    1.21
   1  18   1   10.24    1.64
  -1  18  -1   10.24    1.95
   1  18   1    7.72    1.69
  -1  18  -1    7.18    1.50
   2  18   1   50.94    3.66
  -2  18  -1   49.06    2.88
   2  18   1   48.89    2.52
  -2  18  -1   48.76    3.16
   3  18   1    2.79    1.61
   3  18   1    1.70    1.05
  -3  18  -1    4.37    2.08
  -3  18  -1    2.11    1.32
  -4  18  -1   18.02    2.73
   4  18   1   17.12    2.45
   5  18   1   17.01    2.64
  -5  18  -1   19.50    2.75
   6 -18   1   -0.99    2.23
   6  18   1   -0.90    1.66
   6  18   1   -0.98    1.53
  -6  18  -1   -0.34    2.02
   7 -18   1   15.86    3.27
  -7  18  -1   17.49    2.96
   7  18   1   20.27    3.11
   7  18   1   21.16    2.72
   8 -18   1    2.75    2.60
   8  18   1    4.90    2.42
   8  18   1    5.21    2.04
  -8  18  -1    3.61    2.30
   9 -18   1   -2.52    2.49
  -9  18  -1   -2.30    2.32
   9  18   1   -3.76    2.02
   9  18   1   -0.73    1.96
  10 -18   1    3.04    2.89
  10  18   1    6.72    2.49
 -10  18  -1    8.35    3.02
  10  18   1    2.02    2.61
  10 -19  -1    2.34    2.71
  10  19  -1    1.36    2.28
  10  19  -1    1.27    2.12
 -10  19   1   -2.45    2.54
   9 -19  -1    5.76    2.96
  -9  19   1    4.91    2.68
   9  19  -1    6.23    2.42
   9  19  -1    8.37    2.63
   8 -19  -1   -0.50    2.39
   8  19  -1    0.51    1.91
   8  19  -1    3.37    2.01
  -8  19   1   -1.80    2.25
   7 -19  -1   -0.14    2.51
   7  19  -1    2.48    1.74
  -7  19   1    2.05    2.31
   7  19  -1    0.37    1.76
   6 -19  -1   -3.20    2.43
   6  19  -1   -1.31    1.58
  -6  19   1    0.39    2.15
   6  19  -1   -0.49    1.69
  -5  19   1   20.03    2.89
   5  19  -1   19.55    2.69
  -4  19   1   48.36    3.63
  -4  19   1   48.61    2.57
   4  19  -1   44.31    3.39
   3  19  -1    2.69    1.02
   3  19  -1    2.95    1.66
  -3  19   1    4.35    2.26
  -3  19   1    2.49    1.16
   2  19  -1   23.13    2.48
  -2  19   1   30.32    2.84
  -2  19   1   25.12    2.22
   2  19  -1   29.16    2.31
  -1  19   1    0.06    1.12
   1  19  -1    0.87    1.34
  -1  19   1    0.53    1.74
   1  19  -1    0.33    1.37
   0  19  -1    7.46    1.73
   0  19   1   10.61    1.76
   0  19   1    9.49    1.85
   0  19  -1    7.03    1.52
  -1  19  -1    0.04    1.25
  -1  19  -1    2.85    1.75
   1  19   1    2.90    1.57
   1  19   1    0.57    1.46
  -2  19  -1   17.24    1.94
  -2  19  -1   18.45    2.33
   2  19   1   15.64    1.74
   2  19   1   14.19    2.21
  -3  19  -1   27.83    2.53
  -3  19  -1   29.36    2.95
   3  19   1   20.81    2.65
   4  19   1   43.55    3.57
  -4  19  -1   45.17    3.45
   5  19   1    1.19    1.90
  -5  19  -1    2.68    1.95
   6 -19   1   11.42    3.04
   6  19   1   13.41    2.41
   6  19   1   13.62    2.65
  -6  19  -1   14.65    2.78
   7 -19   1    2.61    2.69
   7  19   1   -0.12    1.79
  -7  19  -1   -1.67    1.94
   7  19   1    0.15    1.85
   8 -19   1    4.43    2.72
  -8  19  -1   10.74    2.58
   8  19   1    8.99    2.32
   8  19   1    8.62    2.68
   9 -19   1    3.90    2.86
   9  19   1    5.20    2.67
   9  19   1    4.47    2.33
  -9  19  -1    4.98    2.74
  10 -19   1   -0.31    2.79
  10  19   1    0.92    2.49
 -10  19  -1   -3.45    2.42
  10  19   1    1.21    2.12
  10 -20  -1   -0.17    2.80
  10  20  -1    0.31    2.27
  10  20  -1    1.52    2.27
 -10  20   1    0.21    2.74
   9 -20  -1   -3.91    2.43
   9  20  -1    0.97    2.04
  -9  20   1   -1.89    2.51
   9  20  -1   -0.52    1.87
   8 -20  -1   -0.02    2.56
  -8  20   1    1.60    2.44
   8  20  -1    7.75    2.34
   8  20  -1    2.53    2.16
   7 -20  -1   10.89    3.08
   7  20  -1   10.80    2.45
   7  20  -1   13.69    2.54
  -7  20   1   11.50    2.79
   6 -20  -1    2.41    2.73
  -6  20   1    3.24    2.12
   6  20  -1    4.36    2.07
   5  20  -1    7.61    2.06
  -5  20   1   11.85    2.40
  -4  20   1   19.53    2.71
   4  20  -1   18.02    2.51
  -4  20   1   16.03    1.60
   3  20  -1    1.27    1.65
  -3  20   1   -1.87    2.16
   3  20  -1    0.19    1.05
  -3  20   1   -1.05    1.10
  -2  20   1    1.74    1.24
   2  20  -1    3.44    1.65
  -2  20   1    5.28    2.19
   2  20  -1    2.44    1.28
  -1  20   1    5.42    2.03
  -1  20   1    4.33    1.42
   1  20  -1    4.92    1.57
   1  20  -1    5.60    1.70
   0  20  -1    2.77    1.60
   0  20   1    1.83    1.46
   0  20   1    1.95    1.70
   0  20  -1    0.94    1.38
   1  20   1    1.25    1.55
   1  20   1    1.07    1.58
  -1  20  -1    1.07    1.79
  -1  20  -1    2.73    1.40
  -2  20  -1   12.40    2.21
   2  20   1   11.88    2.18
  -2  20  -1   11.33    1.82
   2  20   1   13.91    1.69
   3  20   1    2.31    1.85
  -3  20  -1    1.68    1.36
  -3  20  -1    2.66    2.09
  -4  20  -1    7.07    2.13
   4  20   1    5.99    1.95
  -4  20  -1    5.51    1.53
  -5  20  -1   12.19    2.60
   5  20   1    8.56    2.30
   6 -20   1    7.19    2.97
   6  20   1    6.63    2.39
  -6  20  -1    4.21    2.18
   7 -20   1   -1.42    2.24
  -7  20  -1   -3.36    2.06
   7  20   1   -0.67    1.72
   7  20   1   -1.49    2.03
   8 -20   1   -0.47    2.59
  -8  20  -1    1.88    2.44
   8  20   1    0.86    2.32
   8  20   1    4.77    2.16
   9 -20   1   -1.67    2.62
  -9  20  -1    0.50    2.56
   9  20   1    0.37    2.16
   9  20   1   -3.03    2.10
  10 -21  -1   -0.32    2.69
  10  21  -1    1.21    2.28
 -10  21   1   -7.11    2.42
  10  21  -1    0.10    2.11
   9 -21  -1   -0.74    2.65
   9  21  -1   -1.48    2.10
   9  21  -1    0.21    2.14
  -9  21   1   -1.24    2.53
   8 -21  -1    0.72    2.62
   8  21  -1    3.03    2.16
  -8  21   1    1.78    2.50
   8  21  -1    1.09    1.99
   7 -21  -1   15.00    3.24
   7  21  -1   14.41    2.65
   7  21  -1   20.65    2.95
  -7  21   1   17.46    3.04
   6 -21  -1    3.49    2.60
  -6  21   1    6.03    2.43
   6  21  -1    3.11    1.94
  -5  21   1   30.02    3.23
   5  21  -1   23.60    2.90
  -4  21   1   27.46    2.09
  -4  21   1   29.24    3.13
   4  21  -1   21.66    2.67
  -3  21   1   14.35    1.77
   3  21  -1   14.59    2.40
  -3  21   1   18.86    2.78
   3  21  -1   16.78    1.54
   2  21  -1  179.88    6.66
  -2  21   1  179.38    6.16
   2  21  -1  176.19    5.10
  -2  21   1  177.83    5.82
   1  21  -1  104.92    4.15
  -1  21   1  109.58    4.57
   1  21  -1  108.67    4.86
  -1  21   1  107.65    4.62
   0  21  -1    2.32    1.54
   0  21   1    3.06    1.52
   0  21  -1    2.05    1.69
   0  21   1    3.83    1.81
  -1  21  -1   13.73    2.05
   1  21   1   15.08    2.04
  -1  21  -1   21.89    2.56
   1  21   1   15.41    2.27
   2  21   1   31.19    2.46
  -2  21  -1   33.55    2.81
   2  21   1   23.28    2.72
  -2  21  -1   29.71    2.84
  -3  21  -1    5.18    1.53
  -3  21  -1    4.88    2.21
   3  21   1    2.91    1.86
  -4  21  -1   23.15    2.22
   4  21   1   22.85    2.77
  -4  21  -1   24.42    2.96
  -5  21  -1    1.67    2.14
   5  21   1   -0.18    1.93
   6 -21   1   15.39    3.37
  -6  21  -1   19.86    3.06
   6  21   1   13.25    2.74
   7 -21   1   -1.55    2.50
   7  21   1   -0.40    1.89
  -7  21  -1   -3.00    2.08
   8 -21   1    0.47    2.71
   8  21   1   -2.38    1.96
   8  21   1    0.91    2.32
  -8  21  -1    2.52    2.51
   9 -21   1   -3.59    2.63
   9  21   1   -3.04    2.07
   9  21   1   -0.76    2.26
  -9  21  -1    0.09    2.56
  10 -22  -1   -2.35    2.69
  10  22  -1   -2.26    2.23
 -10  22   1   -1.69    2.75
  10  22  -1   -1.43    2.02
   9 -22  -1    2.45    2.96
   9  22  -1    1.31    2.28
  -9  22   1    2.97    2.88
   9  22  -1    4.23    2.35
   8 -22  -1   14.22    3.40
   8  22  -1   14.56    2.89
   8  22  -1   10.12    2.69
  -8  22   1   11.19    2.97
   7 -22  -1   -1.55    2.58
   7  22  -1    0.12    1.88
  -7  22   1    0.72    2.36
   6 -22  -1    5.56    2.96
   6  22  -1    4.55    2.12
  -6  22   1    5.44    2.47
   5  22  -1    2.73    1.83
  -5  22   1    0.55    2.13
  -4  22   1    1.97    1.10
   4  22  -1    0.21    1.60
  -4  22   1    0.74    2.09
  -3  22   1    9.96    2.53
   3  22  -1    6.15    1.98
  -3  22   1    8.68    1.55
  -2  22   1    2.16    1.28
   2  22  -1    3.33    1.45
   2  22  -1    4.47    1.73
  -2  22   1    2.76    2.21
   1  22  -1   24.99    2.68
   1  22  -1   29.15    2.48
  -1  22   1   22.65    2.37
  -1  22   1   26.61    2.76
   0  22  -1   52.42    3.38
   0  22   1   51.69    3.41
   0  22  -1   45.34    3.36
   0  22   1   49.11    3.35
  -1  22  -1    2.57    1.92
  -1  22  -1    1.21    1.44
   1  22   1   -0.21    1.64
   1  22   1   -0.77    1.47
   2  22   1    2.23    1.80
   2  22   1    2.29    1.47
  -2  22  -1    1.09    1.44
  -2  22  -1    4.10    2.10
  -3  22  -1    1.58    1.30
   3  22   1   -1.74    1.47
  -3  22  -1   -0.86    1.91
   4  22   1   12.65    2.37
  -4  22  -1   10.03    1.78
  -4  22  -1   12.93    2.59
   5  22   1   25.27    3.19
  -5  22  -1   30.97    3.24
   6 -22   1   -2.49    2.35
   6  22   1   -2.17    1.87
  -6  22  -1   -1.55    2.20
   7 -22   1    1.44    2.47
   7  22   1    6.32    2.59
  -7  22  -1    6.12    2.65
   8 -22   1    9.99    3.28
   8  22   1   12.56    2.97
  -8  22  -1   12.59    2.87
   9 -22   1   -2.47    2.74
  -9  22  -1   -3.86    2.46
   9  22   1   -0.98    2.29
   9 -23  -1   -3.31    2.77
  -9  23   1   -2.05    2.60
   9  23  -1   -0.45    2.11
   8 -23  -1   -5.58    2.52
  -8  23   1   -1.63    2.43
   8  23  -1    1.13    2.09
   7 -23  -1   -2.36    2.52
  -7  23   1   -0.89    2.29
   7  23  -1   -0.30    1.87
   6 -23  -1   -1.50    2.77
  -6  23   1    1.80    2.11
   6  23  -1    1.31    1.91
  -5  23   1   -0.72    2.14
   5  23  -1    1.31    1.82
   4  23  -1   -1.47    1.57
  -4  23   1    0.30    2.04
  -3  23   1    2.78    1.24
   3  23  -1    2.71    1.79
  -3  23   1    4.62    2.19
   2  23  -1    7.19    1.62
  -2  23   1    6.88    2.31
  -2  23   1    3.83    1.47
   2  23  -1    3.77    1.85
   1  23  -1   -0.41    1.48
  -1  23   1    2.76    2.05
   1  23  -1    0.02    1.50
  -1  23   1   -1.53    1.33
   0  23  -1    1.42    1.79
   0  23   1    3.42    1.99
   0  23   1    2.62    1.64
   0  23  -1    3.72    1.66
   1  23   1    0.22    1.57
  -1  23  -1   -0.02    1.83
  -1  23  -1    1.58    1.53
   1  23   1    0.06    1.61
   2  23   1    4.07    1.52
   2  23   1    2.67    1.75
  -2  23  -1    3.78    2.06
  -2  23  -1    3.44    1.56
  -3  23  -1    0.11    1.98
  -3  23  -1   -0.07    1.24
   3  23   1    0.00    1.45
   4  23   1    8.76    2.27
  -4  23  -1   12.20    2.56
  -4  23  -1    9.13    1.86
   5  23   1   -2.56    1.69
  -5  23  -1    2.19    2.09
   6 -23   1    0.68    2.77
  -6  23  -1    1.18    2.16
   6  23   1   -1.04    1.97
   7 -23   1    9.58    3.19
  -7  23  -1   10.02    2.74
   7  23   1    9.92    2.70
   8 -23   1   -1.41    2.73
  -8  23  -1   -1.60    2.46
   8  23   1   -2.04    2.18
   9 -23   1   -3.19    2.70
   9  23   1    0.15    2.47
  -9  23  -1   -2.13    2.55
   9 -24  -1   -1.30    2.76
  -9  24   1    2.87    2.71
   9  24  -1    0.76    2.29
   8 -24  -1   -0.05    2.84
   8  24  -1    3.67    2.33
  -8  24   1    1.05    2.67
   7 -24  -1   -1.73    2.39
   7  24  -1    1.95    2.05
  -7  24   1    0.45    2.28
   6 -24  -1   -4.07    2.73
  -6  24   1   -0.28    2.23
   6  24  -1    0.13    1.81
   5  24  -1    7.47    2.18
  -5  24   1    5.46    2.47
  -4  24   1    0.23    1.95
   4  24  -1    0.20    1.71
   3  24  -1   21.61    2.76
  -3  24   1   20.23    2.05
  -3  24   1   21.76    2.83
  -2  24   1    3.77    1.40
   2  24  -1    2.77    1.76
  -2  24   1    3.73    2.08
   2  24  -1    2.06    1.45
   1  24  -1   12.11    1.99
  -1  24   1   10.91    1.91
   1  24  -1   11.97    2.17
  -1  24   1   11.09    2.18
   0  24   1    3.78    1.64
   0  24  -1    1.74    1.87
   0  24   1    3.16    1.84
   0  24  -1    3.57    1.60
  -1  24  -1   27.68    2.77
  -1  24  -1   24.62    2.58
   1  24   1   29.60    2.48
   1  24   1   34.07    3.17
   2  24   1   -1.87    1.39
   2  24   1    0.10    1.47
  -2  24  -1    1.41    1.95
  -2  24  -1    1.51    1.43
  -3  24  -1    5.33    1.57
   3  24   1    3.85    1.94
  -3  24  -1    4.59    2.19
   4  24   1   17.52    2.82
  -4  24  -1   18.02    2.92
  -4  24  -1   15.38    2.06
  -5  24  -1   14.28    2.68
   5  24   1    9.34    2.43
   6 -24   1   -3.02    2.69
  -6  24  -1    1.54    2.21
   6  24   1    3.95    2.26
   7 -24   1   19.05    3.79
  -7  24  -1   26.08    3.61
   7  24   1   25.96    3.55
   8 -24   1   12.50    3.55
  -8  24  -1   15.32    3.12
   8  24   1   10.92    3.04
   9 -24   1   -1.88    2.79
   9  24   1   -0.67    2.32
  -9  24  -1   -2.49    2.63
   9 -25  -1    0.85    2.88
  -9  25   1   -3.78    2.52
   9  25  -1    0.10    2.21
   8 -25  -1    2.29    3.08
  -8  25   1   -0.10    2.69
   8  25  -1    2.94    2.30
   7 -25  -1   10.87    3.11
   7  25  -1   11.34    2.74
  -7  25   1    9.30    2.97
   6 -25  -1   -4.56    2.63
  -6  25   1   -1.92    2.04
   6  25  -1    2.14    2.06
   5  25  -1   16.94    2.79
  -5  25   1   22.32    3.06
  -4  25   1    4.13    2.18
   4  25  -1    7.22    2.21
  -3  25   1    0.99    1.19
   3  25  -1    1.18    1.78
  -3  25   1   -0.97    2.02
   2  25  -1   24.49    2.88
  -2  25   1   28.31    2.59
   2  25  -1   25.11    2.22
  -2  25   1   24.77    2.84
   1  25  -1   64.60    4.08
  -1  25   1   60.81    3.74
   1  25  -1   56.70    3.40
  -1  25   1   61.40    3.72
   0  25   1    1.35    1.53
   0  25  -1   -0.37    1.68
   0  25   1   -1.01    1.63
   0  25  -1    2.41    1.53
   1  25   1   78.32    4.46
  -1  25  -1   80.45    4.27
  -1  25  -1   83.84    4.28
   1  25   1   75.78    3.69
   2  25   1   26.63    2.95
  -2  25  -1   25.65    2.80
  -2  25  -1   23.17    2.49
   3  25   1    4.38    2.05
  -3  25  -1    2.19    2.14
  -3  25  -1    4.47    1.53
  -4  25  -1   12.56    2.00
  -4  25  -1   16.95    2.91
   4  25   1   12.98    2.47
   5  25   1    0.18    1.68
  -5  25  -1   -0.96    1.99
   6 -25   1   12.37    3.20
   6  25   1   11.19    2.72
  -6  25  -1   11.60    2.96
   7 -25   1    7.44    3.27
   7  25   1    6.40    2.66
  -7  25  -1    7.63    2.94
   8 -25   1    1.78    3.04
   8  25   1   -2.07    2.25
  -8  25  -1   -4.35    2.47
   9 -26  -1   -2.76    2.69
  -9  26   1   -1.18    2.75
   9  26  -1   -0.94    2.15
   8 -26  -1   -2.16    2.89
  -8  26   1    3.19    2.97
   8  26  -1    0.58    2.19
   7 -26  -1    1.04    2.98
  -7  26   1    6.87    2.84
   7  26  -1    3.73    2.32
   6 -26  -1    0.19    2.95
  -6  26   1    3.12    2.58
   6  26  -1    2.60    2.14
  -5  26   1    4.61    2.52
   5  26  -1    3.62    2.08
   4  26  -1    0.38    1.83
  -4  26   1    0.46    2.26
  -3  26   1    1.57    2.20
  -3  26   1    3.50    1.36
   3  26  -1    0.11    1.74
  -2  26   1   -2.57    1.87
   2  26  -1    1.57    1.66
   2  26  -1    1.12    1.37
  -2  26   1   -0.93    1.24
   1  26  -1    1.56    1.55
  -1  26   1    0.39    1.43
   1  26  -1    0.07    1.59
  -1  26   1    0.35    1.77
   0  26   1   14.38    2.27
   0  26  -1   16.33    2.43
   0  26   1   13.49    2.17
   0  26  -1   12.27    2.15
  -1  26  -1    4.66    2.00
  -1  26  -1    7.04    1.85
   1  26   1    4.94    1.89
   1  26   1    5.80    1.84
  -2  26  -1    2.78    1.53
  -2  26  -1    2.75    2.09
   2  26   1    4.75    1.99
   3  26   1    4.63    1.96
  -3  26  -1    2.85    2.07
  -3  26  -1    2.01    1.47
   4  26   1    8.26    2.35
  -4  26  -1    5.42    2.38
  -5  26  -1   11.78    2.81
   5  26   1    9.17    2.52
   6 -26   1    0.39    2.94
   6  26   1    1.40    2.14
  -6  26  -1    1.66    2.52
   7 -26   1   -1.40    3.03
   7  26   1   -0.28    2.25
  -7  26  -1   -2.96    2.41
   8 -26   1   -5.35    2.78
   8  26   1    0.45    2.43
  -8  26  -1   -3.94    2.45
   8 -27  -1   -4.16    2.90
   8  27  -1   -2.23    2.08
  -8  27   1   -0.42    2.76
   7 -27  -1   -3.94    2.95
  -7  27   1   -0.11    2.35
   7  27  -1    0.31    2.13
   6 -27  -1   -3.16    2.89
   6  27  -1   -1.27    1.91
  -6  27   1   -0.46    2.21
  -5  27   1    4.78    2.60
   5  27  -1    4.27    2.21
  -4  27   1   25.90    3.29
   4  27  -1   22.60    3.10
  -3  27   1   -2.55    2.03
   3  27  -1   -0.39    1.75
  -3  27   1    0.51    1.33
   2  27  -1   12.71    2.40
  -2  27   1   15.48    2.47
  -2  27   1   15.01    2.13
  -1  27   1    3.75    1.67
   1  27  -1    5.47    1.95
  -1  27   1    3.08    2.05
   1  27  -1    3.31    1.75
   0  27  -1    0.45    1.53
   0  27  -1    0.53    1.71
   0  27   1    0.84    1.58
   0  27   1    1.04    1.86
   1  27   1    7.68    2.06
   1  27   1    7.32    1.97
  -1  27  -1    5.70    2.16
  -1  27  -1    7.55    2.04
   2  27   1   -1.45    1.60
  -2  27  -1    2.65    2.16
  -2  27  -1    0.76    1.49
  -3  27  -1    2.61    2.26
  -3  27  -1    4.09    1.62
   3  27   1    2.63    1.97
  -4  27  -1    4.96    2.50
   4  27   1    4.31    2.24
  -5  27  -1   -1.11    2.17
   5  27   1    0.80    2.01
   6 -27   1    1.65    3.20
   6  27   1    0.86    2.21
  -6  27  -1    6.35    2.80
   7 -27   1   -6.67    2.84
   7  27   1   -2.20    2.17
  -7  27  -1    0.78    2.57
   8 -27   1   -3.13    2.84
  -8  27  -1    1.92    2.84
   8  27   1    1.54    2.52
   8 -28  -1   -1.40    3.10
  -8  28   1    0.48    2.68
   8  28  -1    5.64    2.65
   7 -28  -1   -1.90    3.11
   7  28  -1    3.37    2.42
  -7  28   1    2.89    2.93
   6 -28  -1    1.01    3.13
   6  28  -1    1.85    2.13
  -6  28   1    2.63    2.73
  -5  28   1    1.17    2.24
   5  28  -1   -1.41    1.77
  -4  28   1    0.37    2.25
   4  28  -1   -0.45    1.84
  -3  28   1    0.63    1.39
  -3  28   1    1.28    2.22
   3  28  -1    0.72    1.85
  -2  28   1    1.41    2.10
   2  28  -1   -1.30    1.67
  -2  28   1    1.80    1.49
  -1  28   1    1.02    1.56
   1  28  -1   -0.44    1.60
   1  28  -1    0.76    1.70
  -1  28   1    0.15    2.01
   0  28  -1    5.85    1.99
   0  28  -1    3.79    2.06
   0  28   1    5.48    1.98
   0  28   1    5.21    1.92
   1  28   1   -2.01    1.64
  -1  28  -1    1.47    1.66
   1  28   1    1.61    1.76
  -1  28  -1    0.11    1.90
  -2  28  -1    6.00    2.37
   2  28   1    7.61    2.24
  -2  28  -1    7.18    1.84
  -3  28  -1    0.21    1.39
   3  28   1    1.47    1.93
  -3  28  -1   -0.63    2.17
  -4  28  -1    8.25    2.80
   4  28   1   12.17    2.62
   5  28   1   10.76    2.79
  -5  28  -1   14.24    3.17
   6 -28   1   -4.54    2.90
  -6  28  -1   -0.05    2.56
   6  28   1   -1.11    2.12
   7 -28   1   19.82    4.23
  -7  28  -1   24.85    3.63
   7  28   1   23.71    3.70
   8 -28   1    8.52    3.65
   8  28   1   13.69    3.34
  -8  28  -1   13.65    3.31
   8 -29  -1   -3.22    3.01
  -8  29   1   -6.39    2.55
   8  29  -1   -2.47    2.18
   7 -29  -1   -0.89    3.12
   7  29  -1   -0.35    2.24
  -7  29   1   -0.72    2.71
   6 -29  -1   -5.80    3.10
   6  29  -1    2.38    2.23
  -6  29   1    4.78    2.57
  -5  29   1   14.30    3.13
   5  29  -1    5.39    2.40
   4  29  -1    4.99    2.25
  -4  29   1    3.63    2.51
  -3  29   1   -0.83    1.95
   3  29  -1    0.77    1.83
  -2  29   1    4.67    1.70
  -2  29   1    3.83    2.27
   2  29  -1    4.83    2.12
   1  29  -1   15.56    2.41
   1  29  -1   18.78    2.76
  -1  29   1   18.20    2.71
  -1  29   1   13.71    2.33
   0  29   1    0.87    1.60
   0  29   1    0.80    2.05
   0  29  -1    2.92    1.77
   0  29  -1    2.41    1.93
  -1  29  -1   20.40    2.84
   1  29   1   15.83    2.58
  -1  29  -1   19.57    2.70
  -2  29  -1    0.46    2.19
  -2  29  -1    1.99    1.59
   2  29   1    0.59    1.80
   3  29   1    1.21    1.72
  -3  29  -1   -2.31    2.13
  -3  29  -1   -0.34    1.37
  -4  29  -1    1.88    2.46
   4  29   1    1.81    2.09
  -5  29  -1   -2.65    2.47
   5  29   1   -1.04    1.97
   6 -29   1    0.58    3.31
   6  29   1    0.48    2.21
  -6  29  -1   -0.95    2.54
   7 -29   1    2.76    3.39
  -7  29  -1   -5.48    2.20
   7  29   1   -0.17    2.32
   7 -30  -1   -7.72    3.04
  -7  30   1    0.79    2.86
   7  30  -1    1.51    2.31
   6 -30  -1   -8.47    3.03
   6  30  -1    3.57    2.36
  -6  30   1    1.04    2.75
  -5  30   1   -1.14    2.55
   5  30  -1    0.52    2.08
  -4  30   1   -2.37    2.35
   4  30  -1    0.30    1.97
   3  30  -1    1.15    1.90
  -3  30   1   -0.42    2.22
   2  30  -1    1.39    1.87
  -2  30   1    2.20    1.49
  -2  30   1   -0.60    2.11
  -1  30   1    0.03    2.14
   1  30  -1    0.69    1.75
  -1  30   1   -0.05    1.56
   1  30  -1   -1.12    1.73
   0  30  -1    7.05    2.09
   0  30  -1    8.15    2.20
   0  30   1    8.49    2.16
   0  30   1   12.14    2.47
  -1  30  -1    5.30    2.21
  -1  30  -1    4.76    1.83
   1  30   1    7.10    2.19
  -2  30  -1    1.88    1.61
   2  30   1    2.98    2.02
  -2  30  -1   -1.52    2.04
  -3  30  -1    2.05    2.33
   3  30   1    1.04    1.98
  -3  30  -1    1.66    1.56
   4  30   1    1.16    2.04
  -4  30  -1   -2.51    2.25
   5  30   1   -2.20    2.02
  -5  30  -1    0.09    2.66
   6 -30   1    0.04    3.40
   6  30   1   -0.32    2.25
  -6  30  -1   -2.38    2.26
   7 -30   1   -4.14    3.22
  -7  30  -1    0.81    2.75
   7  30   1   -0.20    2.37
   7 -31  -1   -4.50    3.22
  -7  31   1   -2.44    2.72
   7  31  -1   -1.51    2.22
   6 -31  -1   -9.50    2.97
  -6  31   1   -1.84    2.70
   6  31  -1   -1.67    2.07
  -5  31   1   11.90    3.17
   5  31  -1   12.41    2.91
   4  31  -1    7.20    2.46
  -4  31   1    2.42    2.63
   3  31  -1   -1.05    1.66
  -3  31   1   -1.97    2.20
  -2  31   1   13.18    2.21
   2  31  -1   11.82    2.58
  -2  31   1   11.55    2.66
  -1  31   1    8.50    2.49
   1  31  -1    8.72    2.29
  -1  31   1    9.69    2.19
   0  31   1   -2.53    1.81
   0  31  -1    0.92    2.00
   0  31   1    0.06    1.58
   0  31  -1    1.09    1.71
  -1  31  -1   10.96    2.25
   1  31   1    8.52    2.31
  -1  31  -1    4.55    2.36
  -2  31  -1    3.22    2.35
  -2  31  -1    7.57    2.01
   2  31   1    5.55    2.15
  -3  31  -1    1.42    2.39
   3  31   1    1.16    1.83
   4  31   1    0.80    2.14
  -4  31  -1    1.32    2.56
  -5  31  -1    0.05    2.41
   5  31   1   -1.55    2.11
   6 -31   1   -3.54    3.28
   6  31   1    2.08    2.45
  -6  31  -1    2.23    2.80
   7 -31   1   -2.23    3.34
   7  31   1    0.90    2.43
   7 -32  -1   -2.25    3.45
   7  32  -1    3.59    2.59
  -7  32   1    5.38    3.16
   6 -32  -1   -4.71    3.37
  -6  32   1   -0.05    2.61
   6  32  -1   -1.11    2.16
   5  32  -1    5.82    2.38
  -5  32   1    4.72    2.91
   4  32  -1    0.74    2.12
  -4  32   1   -0.48    2.47
  -3  32   1    0.82    2.36
   3  32  -1    2.10    1.95
   2  32  -1    1.49    1.83
  -2  32   1    2.37    1.68
  -2  32   1    4.84    2.45
  -1  32   1    1.90    2.28
  -1  32   1    2.93    1.82
   1  32  -1    3.14    1.99
   0  32   1    6.78    2.13
   0  32  -1    9.14    2.44
   0  32  -1    7.86    2.22
   0  32   1    8.03    2.49
   1  32   1    9.71    2.35
  -1  32  -1   11.78    2.31
  -1  32  -1    4.60    2.28
  -2  32  -1   16.65    2.99
  -2  32  -1   16.01    2.50
   2  32   1   16.55    2.95
  -3  32  -1    0.00    2.37
   3  32   1    1.25    2.09
   4  32   1   13.01    2.91
  -4  32  -1    8.50    2.99
  -5  32  -1    4.71    2.97
   5  32   1    6.98    2.72
   6 -32   1   -7.38    3.11
  -6  32  -1   -1.46    2.63
   6  32   1   -2.02    2.15
   6 -33  -1   -0.62    3.50
  -6  33   1   -1.68    2.77
   6  33  -1    0.91    2.34
  -5  33   1    0.22    2.82
   5  33  -1    2.90    2.16
   4  33  -1    0.39    2.05
  -4  33   1   -2.78    2.51
  -3  33   1    2.10    2.62
   3  33  -1    1.09    2.08
  -2  33   1    2.53    2.41
   2  33  -1    2.70    2.07
  -1  33   1   -2.05    2.10
   1  33  -1    0.64    1.79
  -1  33   1    1.67    1.73
   0  33   1    1.79    1.85
   0  33  -1    0.85    1.79
   0  33  -1   -0.61    2.07
   1  33   1    2.16    1.96
  -1  33  -1   -0.63    2.12
  -1  33  -1    0.51    1.81
  -2  33  -1    4.60    1.88
   2  33   1    4.70    2.26
  -2  33  -1    7.35    2.57
   3  33   1    1.38    2.11
  -3  33  -1    0.51    2.45
   4  33   1   -0.14    2.20
  -4  33  -1   -0.79    2.62
   5  33   1    0.60    2.12
  -5  33  -1   -2.82    2.49
   6 -33   1   -5.16    3.33
   6  33   1    1.13    2.40
  -6  33  -1   -2.31    2.64
   6 -34  -1   -6.94    3.27
   6  34  -1    3.71    2.56
  -6  34   1   -2.66    2.81
  -5  34   1    0.43    2.88
   5  34  -1    5.06    2.56
  -4  34   1    0.01    2.77
   4  34  -1   -0.52    2.11
   3  34  -1   10.08    2.77
  -3  34   1   13.15    3.10
  -2  34   1    5.69    2.72
   2  34  -1   11.40    2.78
  -1  34   1    1.23    1.82
   1  34  -1    1.11    1.98
  -1  34   1   -4.32    2.30
   0  34  -1    4.86    2.19
   0  34  -1    4.45    2.27
   0  34   1    4.43    2.16
  -1  34  -1   -0.92    2.18
  -1  34  -1    1.27    1.83
   1  34   1    3.49    2.03
   2  34   1    6.73    2.52
  -2  34  -1    7.24    2.19
  -2  34  -1   10.53    2.97
   3  34   1   -2.63    1.90
  -3  34  -1   -2.37    2.30
   4  34   1    2.99    2.40
  -4  34  -1    3.13    2.77
   5  34   1    3.09    2.64
  -5  34  -1    5.25    3.05
   5  35  -1   17.58    3.43
  -5  35   1   14.68    3.54
  -4  35   1    0.71    2.95
   4  35  -1    7.40    2.74
  -3  35   1    1.15    2.88
  -2  35   1   12.46    3.12
   2  35  -1   15.18    2.97
  -1  35   1    4.73    2.14
  -1  35   1    5.94    2.63
   1  35  -1    4.24    2.22
   0  35   1    4.26    2.08
   0  35  -1    4.03    2.20
  -1  35  -1   16.29    2.86
   1  35   1   14.70    2.87
  -1  35  -1   11.74    2.86
  -2  35  -1    0.76    2.50
   2  35   1    1.96    2.16
  -2  35  -1    3.33    1.96
   3  35   1    5.54    2.55
  -3  35  -1    3.10    2.69
  -4  35  -1   -1.01    2.64
   4  35   1    5.02    2.56
  -5  35  -1   -5.26    2.46
   5  35   1   -1.94    2.14
   5  36  -1    3.00    2.40
   4  36  -1    0.65    2.32
  -4  36   1   -2.47    2.75
   3  36  -1   -0.20    2.20
  -3  36   1   -2.65    2.51
  -2  36   1   -4.21    2.47
   2  36  -1    1.06    2.08
  -1  36   1    4.46    2.12
  -1  36   1   -0.04    2.55
   1  36  -1    0.79    2.05
   0  36   1    2.12    1.99
   0  36  -1    0.37    2.11
  -1  36  -1   -1.78    2.42
   1  36   1    0.76    1.94
  -1  36  -1    2.54    1.98
   2  36   1    0.53    2.03
  -2  36  -1    0.55    2.54
  -3  36  -1   -6.06    2.33
   3  36   1   -0.26    2.10
  -4  36  -1   -3.47    2.60
   4  36   1   -1.99    2.10
   4  37  -1    1.92    2.45
  -4  37   1   -1.72    2.80
   3  37  -1    1.89    2.25
  -3  37   1   -3.53    2.55
  -2  37   1   -3.03    2.43
   2  37  -1    1.27    2.17
  -1  37   1    0.70    1.96
   1  37  -1    0.16    2.01
   0  37  -1    1.94    2.15
   0  37   1   -0.77    1.79
  -1  37  -1    3.61    2.23
   1  37   1    3.61    2.34
  -1  37  -1   -0.63    2.46
   2  37   1   -0.17    2.00
  -2  37  -1   -0.70    2.50
  -3  37  -1   -3.28    2.39
   3  37   1    0.18    2.23
   3  38  -1    2.74    2.37
  -3  38   1   -1.37    2.74
   2  38  -1    1.71    2.23
  -2  38   1   -4.94    2.46
   1  38  -1    6.83    2.50
   0  38  -1    4.30    2.22
   0  38   1    2.22    2.14
  -1  38  -1    3.92    2.15
   1  38   1    3.66    2.31
  -2  38  -1    1.95    2.66
   2  38   1    3.08    2.44
   1  39  -1    1.84    2.27
   0  39  -1    2.13    2.08
   0  39   1    1.48    2.10
  12   0  -2    3.67    2.34
  11   0  -2   -0.13    1.89
  10   0  -2   14.73    2.53
   9   0  -2    0.54    1.73
  -8   0   2   12.28    1.87
   8   0  -2    8.90    2.06
   7   0  -2    8.76    2.04
  -7   0   2   13.28    1.93
   7   0  -2   12.41    1.57
   6   0  -2  123.29    3.90
   6   0  -2  126.74    4.95
  -6   0   2  121.29    3.97
  -5   0   2   -1.85    1.18
   5   0  -2    0.19    0.72
   5   0  -2   -0.34    1.08
   4   0  -2   24.90    1.41
  -4   0   2   28.50    1.96
   4   0  -2   30.43    2.16
   3   0  -2   60.43    1.93
   3   0  -2   63.72    2.46
  -3   0   2   57.94    2.21
   2   0  -2    0.46    0.63
   2   0  -2    0.95    0.76
  -2   0   2   -0.80    0.98
   1   0  -2  240.20    5.26
   1   0  -2  237.83    5.18
   0   0  -2  539.36   10.71
  -1   0  -2  101.89    2.87
   1   0   2  103.38    2.68
   1   0   2   98.09    3.63
   2   0   2   -0.14    0.74
  -2   0  -2    0.20    0.73
   2   0   2    2.05    1.41
  -3   0  -2  190.35    4.69
   3   0   2  191.56    5.95
   3   0   2  182.00    5.12
   4   0   2   91.27    4.48
   4   0   2   96.05    3.77
  -4   0  -2   92.95    3.12
   5   0   2    6.30    1.58
  -5   0  -2    6.05    1.31
   5   0   2    3.72    2.48
  -6   0  -2   11.26    1.62
   6   0   2    8.46    1.93
   6   0   2   10.09    2.74
   7   0   2   -0.04    2.24
   7   0   2   -0.04    1.45
  -7   0  -2    1.67    1.33
   8   0   2    2.61    1.71
   8   0   2    0.90    2.37
   9   0   2   20.47    2.84
  10   0   2    0.29    1.96
  11   0   2   20.21    3.34
  12  -1  -2    2.82    2.34
  12   1  -2    4.90    2.37
  11  -1  -2    0.76    2.02
  11   1  -2   -0.20    1.96
  10  -1  -2    0.30    1.85
  10   1  -2    4.82    2.03
   9  -1  -2    2.40    1.83
   9   1  -2    3.82    1.85
  -8  -1   2    2.50    1.49
   8  -1  -2    2.24    1.71
  -8   1   2    2.51    1.62
   8   1  -2    3.32    1.75
   8   1  -2    2.10    1.30
   7  -1  -2    8.74    2.05
   7  -1  -2   10.24    1.44
  -7  -1   2   11.89    1.87
   7   1  -2    7.11    1.89
  -7   1   2    9.94    2.01
   7   1  -2    8.01    1.47
   6  -1  -2    7.96    1.66
   6  -1  -2   10.15    1.23
  -6  -1   2   11.75    1.60
  -6   1   2   11.81    1.78
   6   1  -2   10.95    1.38
   6   1  -2   10.57    1.80
   5  -1  -2    2.45    1.23
   5  -1  -2    2.18    0.76
  -5  -1   2    3.22    1.24
   5   1  -2    1.62    1.08
  -5   1   2    3.14    1.30
   5   1  -2    2.56    0.85
   4  -1  -2   10.51    1.34
   4  -1  -2   12.68    1.04
  -4  -1   2    9.91    1.22
   4   1  -2   10.58    1.00
  -4   1   2   10.52    1.35
   4   1  -2    8.87    1.29
   3  -1  -2   27.29    1.97
   3  -1  -2   25.76    1.15
  -3  -1   2   24.58    1.56
   3   1  -2   27.28    1.88
   3   1  -2   28.08    1.42
  -3   1   2   24.71    1.79
   2  -1  -2   10.55    0.98
   2  -1  -2    8.93    1.04
  -2  -1   2    9.90    1.09
   2   1  -2    8.53    0.87
   2   1  -2    9.36    0.99
  -2   1   2   10.31    1.15
   2   1  -2    9.75    0.97
   1  -1  -2   84.64    2.49
   1  -1  -2   86.62    2.22
   1   1  -2   85.68    2.51
   1   1  -2   83.65    2.27
   1   1  -2   81.97    2.33
   0  -1  -2   27.35    1.50
   0   1  -2   28.88    1.43
   1  -1   2    2.77    0.93
  -1  -1  -2   -0.75    0.73
  -1   1  -2    1.15    0.79
   1   1   2    1.64    0.60
   1   1   2    0.38    1.49
   2  -1   2    0.15    0.84
   2  -1   2    0.78    1.20
  -2  -1  -2    0.00    0.68
   2   1   2   -0.09    0.67
  -2   1  -2    1.52    0.81
   2   1   2    1.73    1.49
   3  -1   2   25.62    2.24
   3  -1   2   26.55    1.98
  -3  -1  -2   24.56    1.67
   3   1   2   24.67    1.97
  -3   1  -2   27.27    1.75
   3   1   2   23.23    2.22
   4  -1   2    0.27    1.16
  -4  -1  -2    1.17    0.91
   4  -1   2   -0.65    1.85
   4   1   2    1.52    1.10
   4   1   2    1.88    1.80
  -4   1  -2   -0.51    0.92
   5  -1   2   79.60    4.82
   5  -1   2   80.59    3.82
  -5  -1  -2   77.98    3.07
   5   1   2   73.30    3.77
  -5   1  -2   77.68    3.20
   5   1   2   80.00    4.82
   6  -1   2   38.44    3.50
  -6  -1  -2   33.47    2.49
   6  -1   2   29.33    3.46
   6   1   2   37.20    3.10
  -6   1  -2   36.08    2.63
   6   1   2   33.04    3.49
  -7  -1  -2    2.56    1.29
   7  -1   2    2.36    2.37
   7  -1   2    0.65    1.66
   7   1   2    1.09    2.23
   7   1   2    2.49    1.58
  -7   1  -2    2.34    1.44
   8  -1   2    4.83    1.84
   8  -1   2    4.93    2.56
   8   1   2    6.29    2.03
   8   1   2    3.03    2.49
   9  -1   2    2.42    1.89
   9   1   2    1.20    1.77
   9   1   2   -1.73    2.26
  10  -1   2    2.43    2.19
  10   1   2   -0.89    1.86
  11  -1   2    4.54    2.39
  11   1   2    5.45    2.42
  12  -2  -2    1.49    2.20
  12   2  -2    2.12    2.16
  11  -2  -2   -0.83    1.93
  11   2  -2   -1.76    1.78
  10  -2  -2   -0.05    1.82
  10   2  -2    5.25    2.09
   9  -2  -2    2.12    1.85
   9   2  -2    0.36    1.63
   8  -2  -2   24.83    2.78
   8   2  -2   23.15    2.10
   8   2  -2   21.98    2.62
  -8   2   2   25.49    2.47
  -7  -2   2   25.32    2.09
   7  -2  -2   24.02    2.68
   7  -2  -2   24.76    2.17
  -7   2   2   24.17    2.39
   7   2  -2   26.41    2.55
   7   2  -2   21.65    2.44
  -6  -2   2   22.56    1.82
   6  -2  -2   19.72    2.18
   6  -2  -2   25.72    1.83
   6   2  -2   18.76    2.08
   6   2  -2   23.07    2.17
  -6   2   2   23.76    2.17
   5  -2  -2    8.12    0.87
   5  -2  -2    7.22    1.50
  -5  -2   2    9.19    1.36
   5   2  -2    7.94    1.39
  -5   2   2   10.52    1.63
   5   2  -2    7.85    1.12
   4  -2  -2   69.44    2.00
   4  -2  -2   70.56    3.10
  -4  -2   2   67.41    2.43
   4   2  -2   66.78    2.41
  -4   2   2   66.56    2.68
   4   2  -2   65.03    3.01
   3  -2  -2    3.37    0.97
  -3  -2   2    0.34    0.80
   3  -2  -2    0.56    0.42
   3   2  -2    1.15    0.66
   3   2  -2    0.74    0.82
  -3   2   2    1.63    1.06
  -2   2   2    0.56    1.03
   2   2  -2    0.26    0.68
   2   2  -2   -0.27    0.69
   2   2  -2    0.04    0.72
   1  -2  -2   69.59    2.01
   1  -2  -2   67.37    2.13
   1   2  -2   66.95    2.04
   1   2  -2   69.59    2.34
  -1   2   2   68.71    2.17
   1   2  -2   69.21    2.11
   0  -2  -2   75.84    2.33
   0   2  -2   80.74    2.35
   0   2   2   79.36    2.76
  -1  -2  -2   99.01    2.68
   1   2   2   93.70    2.46
   1   2   2   97.06    3.98
  -1   2  -2  100.43    2.94
  -2  -2  -2   11.05    1.00
   2  -2   2    9.67    1.15
   2  -2   2    9.21    1.56
  -2   2  -2    9.20    1.13
   2   2   2    9.72    0.92
   2   2   2   11.42    1.77
  -3  -2  -2    2.80    0.84
   3  -2   2    0.91    1.04
   3  -2   2    2.17    1.56
  -3   2  -2    2.25    1.04
   3   2   2    1.85    0.86
  -4  -2  -2    8.05    1.07
   4  -2   2    3.92    1.30
   4  -2   2    5.53    1.95
   4   2   2   12.12    2.19
  -4   2  -2    4.86    1.19
   4   2   2    8.28    1.25
  -5  -2  -2    4.66    1.12
   5  -2   2    0.46    2.36
   5  -2   2    3.52    1.58
  -5   2  -2    3.28    1.34
   5   2   2    4.25    2.34
   5   2   2    3.00    1.36
   6  -2   2   -1.15    1.54
   6  -2   2   -0.72    2.44
  -6  -2  -2    2.83    1.25
   6   2   2    4.89    1.58
  -6   2  -2   -0.20    1.37
   6   2   2    0.15    2.36
   7  -2   2    4.29    1.88
   7  -2   2    5.31    2.57
   7   2   2    2.86    2.40
  -7   2  -2    6.07    1.60
   7   2   2    3.83    1.71
   8  -2   2    1.25    1.69
   8  -2   2   -5.01    2.19
  -8   2  -2   -0.96    1.41
   8   2   2    0.86    1.59
   8   2   2    0.96    2.45
   9  -2   2    2.49    1.94
   9   2   2   -1.91    2.36
   9   2   2    2.91    2.03
  10  -2   2   -0.41    1.94
  10   2   2   -1.22    1.77
  11  -2   2    2.45    2.30
  11   2   2    2.66    2.30
  12  -3  -2   17.43    3.21
  12   3  -2   16.93    3.17
  11  -3  -2    1.34    2.09
  11   3  -2   -1.35    1.79
  10  -3  -2    3.09    2.07
  10   3  -2    2.43    1.87
   9  -3  -2    8.77    2.29
   9   3  -2    6.54    2.10
  -9   3   2    7.76    1.99
   8  -3  -2   -0.20    1.62
   8   3  -2    0.65    1.29
  -8   3   2    0.56    1.70
   8   3  -2    1.76    1.56
   7  -3  -2  100.61    3.48
  -7  -3   2   97.62    3.50
   7  -3  -2   97.70    4.98
   7   3  -2  117.95    5.02
  -7   3   2   99.59    4.08
   7   3  -2  100.98    4.14
   6  -3  -2    0.19    0.82
   6  -3  -2    0.63    1.55
  -6  -3   2   -0.43    1.26
  -6   3   2    0.18    1.64
   6   3  -2    3.28    1.36
  -5  -3   2  111.33    3.30
   5  -3  -2  111.58    3.01
   5  -3  -2  116.36    4.26
   5   3  -2  114.61    3.78
   5   3  -2  112.61    4.30
  -5   3   2  111.67    3.78
  -4  -3   2    6.71    1.02
   4  -3  -2    8.01    0.72
   4  -3  -2    6.67    1.25
   4   3  -2    6.16    1.21
   4   3  -2    6.10    0.97
  -4   3   2    8.83    1.41
  -3  -3   2    1.23    0.73
   3  -3  -2    1.30    0.97
  -3   3   2   -0.72    1.07
   3   3  -2    1.25    0.72
   3   3  -2    1.04    0.84
   2  -3  -2  143.73    3.92
   2   3  -2  139.08    3.46
   2   3  -2  146.00    3.90
   2   3  -2  143.90    3.93
  -2   3   2  148.87    3.91
   1  -3  -2  176.57    3.92
   1   3  -2  160.71    4.23
  -1   3   2  158.19    4.15
   1   3  -2  158.20    3.98
   1   3  -2  158.72    3.79
  -1   3   2  156.57    3.99
   0  -3  -2   17.91    1.23
   0   3  -2   20.46    1.40
   0   3  -2   21.50    1.53
   0   3   2   19.40    1.70
  -1  -3  -2  126.29    3.15
   1   3   2  127.92    4.45
   1   3   2  126.54    3.05
  -1   3  -2  125.36    3.49
   2  -3   2  110.06    3.54
  -2  -3  -2  112.09    2.95
   2   3   2  111.93    3.14
   2   3   2  111.95    4.04
  -2   3  -2  118.61    3.31
  -3  -3  -2  277.24    6.10
   3  -3   2  269.83    7.04
   3  -3   2  277.69    7.61
   3   3   2  280.37    7.88
  -3   3  -2  278.06    6.54
   3   3   2  279.58    6.86
   4  -3   2    2.24    1.84
   4  -3   2    2.50    1.34
  -4  -3  -2    3.63    0.88
   4   3   2    1.49    1.04
  -4   3  -2    2.17    1.17
   4   3   2    1.99    1.89
   5  -3   2   54.49    3.71
   5  -3   2   59.03    4.32
  -5  -3  -2   50.28    2.40
   5   3   2   55.24    3.15
  -5   3  -2   51.24    2.96
   5   3   2   54.11    4.36
  -6  -3  -2   53.98    2.62
   6  -3   2   57.89    3.88
   6  -3   2   57.17    5.21
  -6   3  -2   56.21    3.26
   6   3   2   60.76    4.66
   6   3   2   59.38    3.72
   7  -3   2   15.64    2.79
   7  -3   2   14.98    2.31
  -7   3  -2   14.80    1.91
   7   3   2   14.34    2.13
   7   3   2   11.36    2.59
   8  -3   2    1.28    2.60
   8  -3   2    5.80    2.13
   8   3   2    4.76    2.57
  -8   3  -2    8.35    1.82
   8   3   2    4.71    1.82
   9  -3   2   15.29    2.69
   9   3   2   11.85    2.40
   9   3   2   11.34    2.93
  10  -3   2   -2.61    1.78
  10   3   2   -1.02    1.88
  11  -3   2    4.49    2.45
  11   3   2    4.07    2.30
  12  -4  -2   -1.38    2.01
  12   4  -2    1.87    2.22
  11  -4  -2    0.91    2.06
  11   4  -2    0.47    1.95
  10  -4  -2    1.02    1.80
  10   4  -2    2.03    1.84
   9  -4  -2   11.53    2.46
   9   4  -2   14.86    2.50
  -9   4   2   15.79    2.31
   8  -4  -2    2.03    1.82
  -8   4   2    3.27    1.82
   8   4  -2    1.66    1.63
   8   4  -2    0.95    1.35
   7  -4  -2   24.36    2.76
  -7  -4   2   34.60    2.44
  -7   4   2   36.17    3.06
   7   4  -2   29.63    2.72
   7   4  -2   28.27    2.86
   6  -4  -2   65.72    2.36
   6  -4  -2   66.26    3.70
  -6  -4   2   64.28    2.72
  -6   4   2   64.99    3.32
   6   4  -2   70.23    3.21
   6   4  -2   68.81    3.63
   5  -4  -2   -0.09    0.49
  -5  -4   2    1.02    1.03
   5  -4  -2    2.60    1.41
  -5   4   2    0.40    1.38
   5   4  -2   -0.40    1.13
   5   4  -2    0.13    0.90
  -4  -4   2   80.25    2.51
   4  -4  -2   85.04    3.52
   4   4  -2   85.32    3.34
   4   4  -2   84.61    3.01
  -4   4   2   88.03    3.22
  -3  -4   2  182.86    4.07
   3  -4  -2  175.04    5.01
  -3   4   2  177.44    4.71
   3   4  -2  185.93    4.86
   3   4  -2  177.37    4.98
   2  -4  -2  435.08    9.91
   2   4  -2  451.38   10.06
   2   4  -2  448.13   10.25
   2   4  -2  446.01    9.00
  -2   4   2  456.23    9.45
  -2   4   2  455.99    9.58
   1   4  -2    6.28    1.05
  -1   4   2    8.05    1.25
   1   4  -2    6.65    0.90
   1   4  -2    7.48    0.91
  -1   4   2    8.76    1.28
   0  -4  -2  154.19    3.77
   0   4   2  158.94    4.67
   0   4  -2  153.58    4.32
   0   4  -2  157.28    3.90
  -1  -4  -2    6.11    0.85
   1   4   2    6.47    0.68
   1   4   2    6.07    1.46
  -1   4  -2    6.73    1.04
  -2  -4  -2   55.58    1.87
   2   4   2   53.05    2.11
  -2   4  -2   57.69    2.40
   2   4   2   54.61    2.98
   3  -4   2   93.10    3.64
  -3  -4  -2   91.67    2.66
   3  -4   2   94.07    3.92
   3   4   2   93.58    4.36
  -3   4  -2   92.70    3.22
   3   4   2   93.01    3.24
   4  -4   2   28.81    2.68
   4  -4   2   26.86    2.48
  -4  -4  -2   26.05    1.60
   4   4   2   23.79    2.59
  -4   4  -2   27.97    2.33
   4   4   2   29.16    2.23
  -5  -4  -2   46.77    2.26
   5  -4   2   53.00    3.52
   5  -4   2   53.29    4.66
  -5   4  -2   43.33    2.78
   5   4   2   53.57    4.29
   5   4   2   48.85    3.11
  -6  -4  -2    1.93    1.08
   6  -4   2    1.08    2.61
   6  -4   2    3.24    1.80
   6   4   2    4.71    2.48
  -6   4  -2    1.91    1.53
   6   4   2    2.21    1.41
   7  -4   2    0.00    1.64
   7  -4   2   -3.40    2.21
   7   4   2    0.14    2.06
  -7   4  -2   -0.96    1.41
   7   4   2   -0.67    1.45
   8  -4   2    1.41    1.82
   8  -4   2   -2.84    2.41
   8   4   2    3.06    2.49
  -8   4  -2    1.96    1.63
   8   4   2    1.25    1.64
   9  -4   2    9.23    2.39
   9   4   2    8.02    2.83
   9   4   2   12.51    2.42
  10  -4   2   -0.38    1.99
  10   4   2    0.46    1.96
  11  -4   2    5.12    2.49
  11   4   2    6.30    2.43
  12  -5  -2   -1.67    2.01
  12   5  -2    1.18    2.21
  11  -5  -2    0.02    2.06
  11   5  -2    2.26    2.04
  10  -5  -2   -0.37    1.89
  10   5  -2    2.80    1.91
   9  -5  -2    3.81    2.03
  -9   5   2    1.33    1.89
   9   5  -2    5.47    1.89
   8  -5  -2   11.86    2.38
  -8   5   2   19.47    2.38
   8   5  -2   15.91    2.40
   8   5  -2   13.14    1.96
   7  -5  -2   -0.13    1.75
   7   5  -2    0.04    1.57
  -7   5   2   -1.41    1.83
   7   5  -2   -0.35    1.29
   6  -5  -2   20.19    2.44
   6  -5  -2   22.68    1.42
  -6  -5   2   25.78    1.99
   6   5  -2   22.01    1.98
   6   5  -2   18.02    2.12
  -6   5   2   26.54    2.46
   5  -5  -2   76.61    3.62
  -5  -5   2   75.71    2.48
   5   5  -2   76.48    3.63
  -5   5   2   79.85    3.40
   5   5  -2   79.94    3.26
  -4  -5   2   22.83    1.50
   4  -5  -2   19.73    1.89
   4   5  -2   23.31    1.72
   4   5  -2   18.52    1.73
  -4   5   2   26.15    2.04
   3  -5  -2    8.44    1.31
   3   5  -2    6.28    1.11
  -3   5   2    6.04    1.37
   3   5  -2    9.02    1.12
   3   5  -2    9.17    0.81
   2  -5  -2  905.60   19.39
   2   5  -2  936.79   19.57
   2   5  -2  923.36   20.09
  -2   5   2  928.41   18.23
   2   5  -2  933.57   17.77
  -2   5   2  907.68   19.29
   1   5  -2    8.09    0.96
  -1   5   2   10.52    1.23
   1   5  -2    8.45    1.13
  -1   5   2    8.96    1.32
   0   5   2   25.51    1.70
   0   5  -2   28.39    1.83
   0   5  -2   25.04    1.84
   0   5   2   30.60    2.57
  -1  -5  -2  270.93    5.63
   1   5   2  255.73    5.84
   1   5   2  254.87    6.98
  -1   5  -2  258.45    6.04
  -2  -5  -2   41.58    1.67
   2   5   2   42.42    1.83
   2   5   2   42.09    3.05
  -2   5  -2   42.56    2.23
   3  -5   2   30.05    2.60
  -3  -5  -2   24.32    1.39
  -3   5  -2   26.39    1.89
   3   5   2   23.72    1.87
   3   5   2   24.91    2.41
  -4  -5  -2    3.22    0.81
   4  -5   2    3.51    1.79
   4  -5   2    3.17    1.49
   4   5   2    5.42    1.94
   4   5   2    2.37    1.03
  -4   5  -2    3.91    1.34
  -5  -5  -2    6.97    1.07
   5  -5   2    7.46    1.91
   5  -5   2    9.43    2.59
   5   5   2    6.34    1.48
  -5   5  -2    9.80    1.74
   5   5   2    8.78    2.37
   6  -5   2    5.07    2.11
   6  -5   2    7.53    2.56
  -6  -5  -2    6.01    1.18
  -6   5  -2    4.31    1.70
   6   5   2    4.92    2.46
   6   5   2    3.81    1.53
   7  -5   2   -2.31    2.30
   7  -5   2   -2.07    1.61
  -7   5  -2   -1.39    1.48
   7   5   2    1.59    1.45
   7   5   2    0.03    2.09
   8  -5   2   -4.11    2.38
   8  -5   2   -0.61    1.79
   8   5   2   -1.74    2.30
   8   5   2   -2.09    1.39
  -8   5  -2   -0.21    1.61
   9  -5   2    0.12    1.99
   9   5   2    1.13    1.80
   9   5   2   -2.08    2.20
  10  -5   2   -0.79    1.97
  10   5   2    0.22    1.95
  11  -5   2   -1.52    2.16
  11   5   2    0.09    1.88
  12  -6  -2   -0.88    2.14
  12   6  -2    1.47    2.19
  11  -6  -2   -2.40    1.87
  11   6  -2    0.92    2.03
  10  -6  -2    0.24    1.98
  10   6  -2    5.14    2.08
   9  -6  -2    9.48    2.40
   9   6  -2    5.59    1.83
   9   6  -2    6.46    2.12
  -9   6   2    6.79    2.09
   8  -6  -2    7.34    2.18
   8   6  -2    7.07    1.99
   8   6  -2   12.57    1.95
  -8   6   2    8.29    2.10
   7  -6  -2    1.63    1.90
   7   6  -2    2.90    1.50
   7   6  -2    2.03    1.52
  -7   6   2    7.09    2.23
   6  -6  -2   43.09    3.79
  -6  -6   2   43.83    2.11
   6   6  -2   51.05    3.28
   6   6  -2   48.53    3.03
  -6   6   2   47.48    3.33
  -5  -6   2    0.14    0.88
   5  -6  -2    0.34    1.44
  -5   6   2    0.36    1.37
   5   6  -2   -0.52    1.11
   5   6  -2    0.18    1.07
   4  -6  -2  179.08    5.54
  -4  -6   2  176.43    4.04
   4   6  -2  182.02    5.48
   4   6  -2  182.28    5.24
  -4   6   2  182.37    5.18
   3  -6  -2  373.00    8.97
   3   6  -2  388.69    9.14
  -3   6   2  364.57    8.30
   3   6  -2  369.79    8.99
   3   6  -2  368.91    7.55
   2  -6  -2   57.62    2.76
   2   6  -2   57.59    1.85
  -2   6   2   53.09    2.57
   2   6  -2   57.54    2.38
  -2   6   2   57.52    1.77
   2   6  -2   56.55    2.39
  -1   6   2  148.37    4.07
   1   6  -2  151.81    4.26
  -1   6   2  145.97    3.86
   1   6  -2  148.78    3.67
   0   6   2   50.15    2.19
   0   6   2   54.01    2.72
   0   6  -2   44.11    2.23
   0   6  -2   46.07    2.08
  -1  -6  -2  161.16    3.87
   1   6   2  167.14    5.14
  -1   6  -2  164.85    4.66
  -1   6  -2  169.67    4.37
  -2  -6  -2  216.02    4.75
   2   6   2  201.40    6.22
  -2   6  -2  217.21    5.41
   2   6   2  214.98    5.30
   3  -6   2    3.19    1.50
  -3  -6  -2    0.00    0.65
   3   6   2    3.14    1.66
  -3   6  -2    1.67    1.17
   3   6   2    1.18    0.83
   4  -6   2    3.15    1.86
   4  -6   2    2.70    1.56
  -4  -6  -2    2.64    0.77
   4   6   2   -0.17    1.82
  -4   6  -2    2.65    1.37
   4   6   2    3.01    1.06
  -5  -6  -2    9.19    1.11
   5  -6   2    5.94    1.98
   5  -6   2   11.96    2.65
   5   6   2    9.11    1.66
   5   6   2   11.33    2.52
  -5   6  -2    9.53    1.79
   6  -6   2    2.99    1.91
   6  -6   2    1.24    2.56
   6   6   2    2.40    1.45
  -6   6  -2    2.31    1.78
   6   6   2    2.14    2.37
   7  -6   2   17.91    2.96
   7  -6   2   15.54    2.50
   7   6   2   14.43    2.85
   7   6   2   16.77    2.23
  -7   6  -2   16.44    2.18
   8  -6   2    1.67    1.93
  -8   6  -2    2.06    1.77
   8   6   2    3.72    1.73
   8   6   2   -0.91    2.25
   9  -6   2    3.20    2.17
   9   6   2    0.49    2.41
   9   6   2    5.59    1.99
  10  -6   2    2.01    2.25
  10   6   2    1.29    1.94
  11  -6   2   -1.54    2.09
  11   6   2   -0.40    1.87
  12  -7  -2    9.51    2.85
  12   7  -2   11.57    2.96
  11  -7  -2   -2.09    1.95
  11   7  -2    0.27    1.92
  10  -7  -2   12.60    2.71
 -10   7   2   12.73    2.54
  10   7  -2   11.11    2.56
   9  -7  -2   32.16    3.46
  -9   7   2   40.14    3.46
   9   7  -2   38.40    3.40
   9   7  -2   31.77    3.41
   8  -7  -2    3.17    2.05
   8   7  -2    5.08    1.82
   8   7  -2    4.56    1.63
  -8   7   2    5.41    2.03
   7  -7  -2   15.01    2.53
   7   7  -2   13.47    2.16
  -7   7   2   13.70    2.47
   7   7  -2   10.94    1.81
   6  -7  -2    6.21    1.99
  -6  -7   2    7.07    1.08
  -6   7   2    8.57    2.14
   6   7  -2    6.23    1.58
   6   7  -2    7.61    1.52
   5  -7  -2    9.73    1.86
  -5  -7   2    9.06    1.01
  -5   7   2   10.17    1.88
   5   7  -2    7.84    1.46
   5   7  -2    8.03    1.46
   4  -7  -2   21.19    2.05
  -4  -7   2   22.67    1.30
  -4   7   2   27.16    2.27
   4   7  -2   21.76    1.88
   4   7  -2   23.91    1.99
   3  -7  -2    2.23    1.12
  -3   7   2    3.36    1.24
   3   7  -2    2.91    0.65
   3   7  -2    3.72    1.02
   3   7  -2    2.38    0.99
  -2   7   2   34.14    1.39
   2   7  -2   35.46    2.04
   2   7  -2   34.01    1.52
  -2   7   2   34.16    2.33
   2   7  -2   34.80    1.99
   1   7  -2  106.51    3.49
  -1   7   2  105.97    3.33
  -1   7   2  105.45    3.22
   1   7  -2  103.02    2.89
   0   7   2   23.34    1.81
   0   7  -2   24.61    1.71
   0   7   2   30.59    2.24
   0   7  -2   25.18    1.80
  -1   7  -2   59.82    2.37
  -1   7  -2   59.21    2.53
   1   7   2   59.04    3.08
   1   7   2   55.98    2.03
  -2  -7  -2   79.40    2.32
  -2   7  -2   82.66    2.98
   2   7   2   80.03    3.79
   2   7   2   83.08    2.75
   3  -7   2  173.87    5.58
  -3  -7  -2  170.83    4.03
  -3   7  -2  171.47    5.01
   3   7   2  178.34    4.96
   3   7   2  178.20    5.98
   4  -7   2   12.07    2.19
  -4  -7  -2   11.71    1.01
   4  -7   2   10.31    1.93
   4   7   2   11.03    1.40
  -4   7  -2   12.71    1.82
   4   7   2   16.03    2.33
  -5  -7  -2  107.15    3.03
   5  -7   2  120.99    5.46
   5  -7   2  108.02    4.97
  -5   7  -2  109.28    4.28
   5   7   2  112.40    5.47
   5   7   2  104.61    4.23
   6  -7   2  119.06    5.97
   6  -7   2  114.36    5.39
   6   7   2  117.36    4.89
   6   7   2  122.85    5.92
  -6   7  -2  110.69    4.48
   7  -7   2   -0.58    2.38
   7  -7   2    0.91    1.85
   7   7   2    1.06    1.46
   7   7   2   -1.09    2.06
  -7   7  -2   -0.10    1.54
   8  -7   2   28.31    3.20
   8   7   2   34.85    3.22
   8   7   2   27.85    3.36
  -8   7  -2   31.85    2.95
   9  -7   2   24.99    3.34
  -9   7  -2   25.56    2.87
   9   7   2   30.09    3.17
   9   7   2   23.23    3.38
  10  -7   2   -3.22    1.98
  10   7   2   -4.12    2.31
  10   7   2    1.30    1.78
  11  -7   2    5.86    2.68
  11   7   2    7.99    2.57
  12  -8  -2   -3.18    1.97
  12   8  -2    0.55    2.29
  11  -8  -2   -1.58    2.00
  11   8  -2   -0.47    1.96
  10  -8  -2    1.29    2.07
 -10   8   2   -1.18    2.07
  10   8  -2    3.29    2.00
   9  -8  -2   -0.03    1.84
   9   8  -2    1.14    1.78
   9   8  -2    1.34    1.66
  -9   8   2    0.80    1.91
   8  -8  -2   19.18    2.65
  -8   8   2   17.52    2.52
   8   8  -2   15.38    2.16
   8   8  -2   12.72    2.29
   7  -8  -2   79.74    5.02
   7   8  -2   88.93    4.29
  -7   8   2   89.87    4.58
   7   8  -2   84.14    4.53
   6  -8  -2   41.63    3.41
  -6   8   2   39.43    3.42
   6   8  -2   33.77    3.02
   6   8  -2   37.46    3.03
   5  -8  -2    2.27    1.67
  -5  -8   2    3.03    0.82
   5   8  -2    4.39    1.37
  -5   8   2    4.81    1.79
   5   8  -2    2.30    1.24
  -4  -8   2   11.71    0.86
   4  -8  -2    8.75    1.75
   4   8  -2    8.61    1.37
   4   8  -2    8.89    1.36
  -4   8   2    9.37    1.78
   3  -8  -2  155.29    4.91
  -3   8   2  142.76    4.33
   3   8  -2  147.63    4.62
   3   8  -2  152.60    3.48
   3   8  -2  153.86    4.66
   2   8  -2   53.10    2.40
   2   8  -2   55.07    1.90
   2   8  -2   56.32    2.52
  -2   8   2   50.84    2.44
  -2   8   2   55.81    1.86
  -1   8   2  863.91   17.38
  -1   8   2  872.86   18.94
   1   8  -2  897.54   19.48
   1   8  -2  872.47   17.19
   0   8  -2   34.20    2.10
   0   8  -2   34.31    1.98
   0   8   2   37.96    2.36
   0   8   2   37.89    1.91
   1   8   2   37.68    2.71
   1   8   2   36.78    1.72
  -1   8  -2   41.08    2.19
  -1   8  -2   36.34    2.13
  -2   8  -2    0.43    1.10
   2   8   2   -0.17    1.34
   2   8   2    0.77    0.73
   2   8   2    0.77    0.76
  -3  -8  -2   61.39    1.95
   3   8   2   58.45    3.76
   3   8   2   57.14    2.54
  -3   8  -2   57.54    2.94
  -4  -8  -2    1.91    0.74
   4  -8   2    2.86    1.81
  -4   8  -2    1.91    1.35
   4   8   2    0.32    1.86
   4   8   2    0.63    0.99
   5  -8   2    3.43    2.30
  -5  -8  -2    0.61    0.75
   5  -8   2   -1.25    1.84
   5   8   2    1.03    2.15
  -5   8  -2   -0.43    1.60
   5   8   2   -0.31    1.17
   6  -8   2    4.23    2.69
   6  -8   2    1.44    1.96
  -6   8  -2    1.59    1.71
   6   8   2    3.87    1.53
   6   8   2    1.63    2.21
   7  -8   2    1.85    1.96
   7  -8   2    2.98    2.50
   7   8   2    2.16    1.45
  -7   8  -2   -1.07    1.59
   7   8   2    0.44    2.09
   8  -8   2   -0.09    1.97
   8   8   2   -2.07    2.00
  -8   8  -2    1.52    1.83
   8   8   2   -0.19    1.39
   9  -8   2   -4.00    1.82
  -9   8  -2   -0.50    1.88
   9   8   2   -0.16    1.60
   9   8   2   -1.50    2.33
  10  -8   2   -0.08    2.22
  10   8   2    2.99    1.96
  10   8   2   -5.00    2.25
  11  -8   2   -1.55    2.34
  11   8   2    2.88    2.21
  12  -9  -2   -0.79    2.24
  12   9  -2    2.10    2.28
  11  -9  -2   -1.72    2.02
  11   9  -2   -0.19    1.96
  10  -9  -2    0.93    2.14
  10   9  -2    0.86    1.92
 -10   9   2   -2.57    1.96
   9  -9  -2    4.74    2.26
   9   9  -2    4.41    1.94
  -9   9   2    1.62    2.07
   9   9  -2    5.02    1.79
   8  -9  -2   -1.20    1.86
  -8   9   2    1.74    2.01
   8   9  -2    2.33    1.61
   8   9  -2   -0.65    1.51
   7  -9  -2    2.35    2.09
  -7   9   2    3.82    2.22
   7   9  -2    1.03    1.43
   7   9  -2    3.37    1.69
   6  -9  -2    6.17    2.14
   6   9  -2    4.35    1.52
  -6   9   2    7.38    2.26
   6   9  -2    5.78    1.72
   5  -9  -2  105.00    4.82
  -5  -9   2  100.80    2.48
   5   9  -2  100.15    4.22
  -5   9   2  105.94    4.27
   5   9  -2  101.66    4.13
   4  -9  -2   53.67    3.15
  -4  -9   2   50.22    1.62
   4   9  -2   48.58    2.73
   4   9  -2   48.59    2.71
  -4   9   2   50.32    2.84
   3  -9  -2   -0.80    1.21
   3   9  -2    0.72    0.95
  -3   9   2   -1.29    1.22
   3   9  -2    1.78    1.03
  -3   9   2   -0.07    0.41
   3   9  -2    0.27    0.56
  -2   9   2   51.40    1.87
  -2   9   2   44.79    2.42
   2   9  -2   46.50    2.42
   2   9  -2   47.25    1.76
   2   9  -2   50.05    2.36
   1   9  -2   97.13    3.39
   1   9  -2  100.60    2.86
  -1   9   2   93.40    3.14
  -1   9   2   93.07    3.20
   0   9  -2    1.21    0.96
   0   9   2    2.73    1.02
   0   9   2    3.53    1.11
   0   9  -2    0.49    0.91
   1   9   2    7.38    1.01
   1   9   2    7.22    1.42
  -1   9  -2    6.11    1.15
  -1   9  -2    6.27    1.25
  -2   9  -2    1.22    1.11
   2   9   2    3.65    0.90
   2   9   2    2.14    1.45
   2   9   2    3.16    0.86
   3   9   2   40.59    1.67
   3   9   2   35.98    2.91
   3   9   2   36.19    2.13
  -3   9  -2   38.39    2.66
  -4  -9  -2   11.11    0.94
   4  -9   2   11.95    2.26
   4   9   2   12.23    2.29
  -4   9  -2   11.89    1.93
   4   9   2   10.61    1.50
   5  -9   2    0.43    2.21
   5  -9   2    1.36    2.05
   5   9   2    0.91    2.15
  -5   9  -2    2.02    1.76
   5   9   2    0.71    1.24
   6  -9   2    0.32    2.43
   6  -9   2    1.74    2.03
  -6   9  -2    4.38    1.88
   6   9   2    1.69    1.40
   6   9   2    2.07    2.25
   7  -9   2   -2.53    2.33
   7  -9   2   -0.27    1.91
  -7   9  -2    1.26    1.70
   7   9   2   -0.42    1.37
   7   9   2   -1.06    2.01
   8  -9   2    1.16    2.12
  -8   9  -2    7.73    2.20
   8   9   2    6.39    1.84
   8   9   2    5.66    2.42
   9  -9   2    0.09    2.12
  -9   9  -2   -2.02    1.93
   9   9   2    0.29    2.17
   9   9   2   -0.23    1.67
  10  -9   2    1.22    2.33
  10   9   2   -1.30    2.26
  10   9   2    1.89    1.87
  12 -10  -2   -2.29    2.14
  12  10  -2    4.45    2.40
  11 -10  -2    6.53    2.72
  11  10  -2    5.77    2.41
  10 -10  -2    0.06    2.10
  10  10  -2    0.31    1.83
 -10  10   2   -3.36    1.99
   9 -10  -2   11.62    2.66
   9  10  -2   13.04    2.38
   9  10  -2   13.64    2.33
  -9  10   2    7.02    2.35
   8 -10  -2    4.03    2.19
   8  10  -2    0.33    1.51
   8  10  -2    2.01    1.54
  -8  10   2    3.95    2.09
   7 -10  -2   18.38    2.59
  -7  10   2   21.49    2.80
   7  10  -2   18.13    2.24
   7  10  -2   17.01    2.41
   6 -10  -2   60.70    4.52
   6  10  -2   55.07    3.50
   6  10  -2   50.22    3.44
  -6  10   2   61.02    3.91
   5 -10  -2   17.64    2.30
   5  10  -2   17.47    1.99
  -5  10   2   18.02    2.35
   5  10  -2   18.59    2.03
   4 -10  -2   18.24    2.09
  -4 -10   2   19.14    1.13
  -4  10   2   19.03    2.20
   4  10  -2   20.16    1.97
   4  10  -2   16.66    1.81
  -3  10   2  103.25    2.68
   3  10  -2  102.27    2.64
  -3  10   2  104.31    3.97
   3  10  -2  100.14    3.78
   3  10  -2  100.07    3.75
   2  10  -2    6.34    1.20
   2  10  -2    5.70    0.88
  -2  10   2    6.76    0.83
  -2  10   2    6.01    1.35
  -1  10   2   72.05    2.66
  -1  10   2   68.74    2.78
   1  10  -2   64.94    2.36
   1  10  -2   68.01    2.83
   0  10   2   22.94    1.93
   0  10   2   23.67    2.06
   0  10  -2   22.81    1.60
   0  10  -2   19.43    1.84
   1  10   2  175.24    5.36
   1  10   2  174.17    4.35
  -1  10  -2  183.20    5.24
  -1  10  -2  178.68    4.91
  -2  10  -2   59.12    2.74
  -2  10  -2   57.10    2.69
   2  10   2   52.81    2.00
   2  10   2   60.45    3.46
   3  10   2    1.82    1.69
   3  10   2    2.49    0.95
  -3  10  -2    2.75    1.33
   3  10   2    4.77    0.87
   4 -10   2    5.54    2.24
   4  10   2    4.20    1.25
   4  10   2    6.46    0.91
   4  10   2    5.70    2.11
  -4  10  -2    3.11    1.69
   5 -10   2   31.81    3.21
   5 -10   2   36.61    3.14
   5  10   2   36.37    2.72
   5  10   2   33.07    3.28
  -5  10  -2   33.90    2.88
   6 -10   2    1.57    2.40
   6 -10   2    1.60    2.00
  -6  10  -2    5.14    1.95
   6  10   2    0.93    2.07
   6  10   2    1.76    1.45
   7 -10   2    8.74    2.40
   7 -10   2   10.39    2.76
  -7  10  -2    8.51    2.10
   7  10   2    9.93    2.49
   7  10   2    9.20    1.89
   8 -10   2   -1.64    2.06
  -8  10  -2    0.20    1.86
   8  10   2   -1.30    2.07
   8  10   2    2.78    1.74
   9 -10   2    6.76    2.58
   9  10   2    4.99    2.60
  -9  10  -2    7.02    2.24
   9  10   2    5.76    1.94
  10 -10   2    1.17    2.42
  10  10   2    4.71    2.12
  10  10   2    3.33    2.57
  11 -11  -2   -0.82    2.30
  11  11  -2   -1.37    1.93
  10 -11  -2    6.29    2.53
  10  11  -2    9.69    2.45
 -10  11   2    4.93    2.58
   9 -11  -2    2.94    2.28
   9  11  -2    5.59    2.02
  -9  11   2    7.66    2.35
   9  11  -2    3.60    1.97
   8 -11  -2    0.56    1.87
   8  11  -2    0.41    1.61
   8  11  -2    0.70    1.61
  -8  11   2    1.87    2.07
   7 -11  -2    2.49    2.11
   7  11  -2    0.24    1.43
  -7  11   2   -3.25    1.99
   7  11  -2    1.66    1.60
   6 -11  -2    4.76    2.09
  -6  11   2    3.26    2.27
   6  11  -2    1.39    1.56
   6  11  -2    2.31    1.56
   5 -11  -2    3.15    1.89
   5  11  -2    1.19    1.32
  -5  11   2    0.70    1.80
   5  11  -2   -0.14    1.31
   4 -11  -2    2.82    1.83
   4  11  -2    1.55    0.58
   4  11  -2    0.70    1.18
   4  11  -2   -0.40    1.09
  -4  11   2   -0.22    1.50
  -3  11   2    0.33    0.51
   3  11  -2    0.86    1.05
   3  11  -2   -0.28    0.59
   3  11  -2   -0.44    1.02
  -3  11   2    0.84    1.57
   2  11  -2    0.23    0.70
  -2  11   2    1.80    1.38
   2  11  -2    2.36    1.08
  -2  11   2    1.82    0.72
  -1  11   2    8.23    1.45
   1  11  -2    8.32    1.30
  -1  11   2    6.40    1.08
   1  11  -2    8.55    1.12
   0  11   2    0.92    1.04
   0  11  -2   -1.23    0.86
   0  11  -2    1.95    1.02
   0  11   2   -0.54    1.02
  -1  11  -2    1.64    1.00
  -1  11  -2    4.73    1.30
   1  11   2    2.42    1.29
   1  11   2    1.58    1.00
   2  11   2    4.66    1.03
  -2  11  -2    6.22    1.27
  -2  11  -2    5.74    1.47
   2  11   2    2.61    1.53
   3  11   2   47.57    2.63
  -3  11  -2   53.92    3.11
   3  11   2   50.68    3.66
   3  11   2   53.88    1.96
   4 -11   2   -1.38    2.10
   4  11   2    0.47    1.11
   4  11   2    2.16    1.93
   4  11   2    1.08    0.81
  -4  11  -2    2.86    1.72
   5 -11   2   49.67    4.38
  -5  11  -2   44.31    3.16
   5  11   2   45.06    3.13
   5  11   2   53.25    4.40
   6 -11   2   28.57    3.13
   6 -11   2   21.16    2.95
   6  11   2   29.10    3.17
   6  11   2   24.66    2.45
  -6  11  -2   26.81    2.79
   7 -11   2    0.87    2.15
   7  11   2    3.49    1.59
   7  11   2    3.39    2.36
  -7  11  -2    1.86    1.97
   8 -11   2   28.75    3.47
   8  11   2   23.75    3.42
  -8  11  -2   32.59    3.20
   8  11   2   26.78    2.95
   9 -11   2    1.50    2.34
  -9  11  -2    3.24    2.13
   9  11   2    2.93    2.39
   9  11   2    5.37    1.93
  10 -11   2   -3.93    2.27
  10  11   2   -4.61    2.28
  10  11   2    1.47    1.86
  11 -12  -2    2.87    2.54
  11  12  -2    3.21    2.22
 -11  12   2    0.88    2.52
  10 -12  -2   -0.28    2.24
  10  12  -2    4.53    2.06
 -10  12   2    3.69    2.57
  10  12  -2    1.74    1.97
   9 -12  -2    6.00    2.30
  -9  12   2    4.41    2.26
   9  12  -2    7.38    2.04
   9  12  -2    5.10    2.05
   8 -12  -2    6.27    2.19
   8  12  -2    3.39    1.84
   8  12  -2    5.01    1.91
  -8  12   2    5.38    2.30
   7 -12  -2   -0.17    1.99
   7  12  -2   -1.01    1.39
  -7  12   2    0.64    2.13
   7  12  -2    0.71    1.52
   6 -12  -2    9.59    2.53
   6  12  -2    7.36    1.85
  -6  12   2    9.47    2.61
   6  12  -2    5.63    1.85
   5 -12  -2    2.49    1.91
  -5  12   2    1.59    1.93
   5  12  -2    0.99    1.41
   5  12  -2    0.73    1.36
   4 -12  -2    1.75    1.90
  -4  12   2    2.31    1.83
   4  12  -2    2.69    1.31
   4  12  -2    1.83    0.59
   4  12  -2    3.05    1.35
   3  12  -2   61.01    3.01
   3  12  -2   58.72    1.96
  -3  12   2   58.33    2.02
  -3  12   2   58.03    3.08
   3  12  -2   57.66    3.08
   2  12  -2   -0.56    1.02
   2  12  -2    1.12    0.76
  -2  12   2    1.45    0.75
  -2  12   2   -0.65    1.44
   1  12  -2    0.36    0.93
   1  12  -2    1.20    1.04
  -1  12   2    1.83    1.21
  -1  12   2   -0.01    0.89
   0  12   2   11.69    1.49
   0  12   2    9.09    1.35
   0  12  -2    8.11    1.38
   0  12  -2    8.50    1.32
   1  12   2   63.46    2.52
  -1  12  -2   67.49    2.82
  -1  12  -2   59.37    2.89
   1  12   2   64.30    3.38
   2  12   2    7.94    1.68
   2  12   2    7.75    1.15
  -2  12  -2    4.39    1.27
  -2  12  -2    7.68    1.62
  -3  12  -2    9.11    1.84
   3  12   2    9.38    1.47
   3  12   2   12.55    1.14
   3  12   2    8.05    1.85
   4  12   2   33.00    2.42
  -4  12  -2   33.58    2.85
   4  12   2   28.87    2.95
   4  12   2   33.68    1.63
   5 -12   2    7.61    2.58
   5  12   2    4.82    1.52
  -5  12  -2    6.27    1.91
   5  12   2    5.71    2.26
   6 -12   2    4.35    2.23
   6 -12   2   -0.23    2.30
   6  12   2    1.21    1.36
   6  12   2   -0.33    1.93
  -6  12  -2    1.03    1.82
   7 -12   2    8.54    2.60
   7  12   2    7.33    1.90
  -7  12  -2    9.32    2.25
   7  12   2   11.23    2.58
   8 -12   2   -2.84    2.02
   8  12   2   -0.51    2.06
   8  12   2    0.51    1.63
  -8  12  -2   -0.33    1.87
   9 -12   2    6.68    2.64
  -9  12  -2    9.85    2.64
   9  12   2    2.26    2.53
   9  12   2    8.83    2.26
  10 -12   2    2.00    2.51
  10  12   2   -0.07    2.65
  10  12   2    4.43    2.02
 -10  12  -2   -1.43    2.06
  11 -13  -2   -3.22    2.27
 -11  13   2   -1.21    2.54
  11  13  -2   -0.19    2.03
  10 -13  -2    1.09    2.37
  10  13  -2    8.45    2.30
 -10  13   2   -0.25    2.47
  10  13  -2    4.83    2.27
   9 -13  -2    7.15    2.60
   9  13  -2    4.82    1.82
   9  13  -2    2.86    1.92
  -9  13   2    0.34    2.14
   8 -13  -2    8.96    2.61
  -8  13   2   11.99    2.64
   8  13  -2    9.98    2.28
   8  13  -2   10.94    2.22
   7 -13  -2   19.46    2.93
   7  13  -2   20.31    2.53
  -7  13   2   23.13    2.91
   7  13  -2   17.61    2.47
   6 -13  -2    1.93    2.29
   6  13  -2    3.00    1.69
  -6  13   2    3.19    2.25
   6  13  -2    3.73    1.65
   5 -13  -2   49.00    4.42
  -5  13   2   40.80    3.37
   5  13  -2   42.14    3.13
   5  13  -2   41.95    3.21
   4 -13  -2   29.32    2.73
  -4  13   2   30.46    1.45
   4  13  -2   30.86    2.49
  -4  13   2   37.98    2.97
   4  13  -2   30.19    1.30
   4  13  -2   36.02    2.67
   3  13  -2   37.31    2.69
  -3  13   2   41.52    1.76
   3  13  -2   40.54    1.72
  -3  13   2   42.88    2.79
  -2  13   2   87.19    3.74
   2  13  -2   85.47    3.58
  -2  13   2   87.75    3.00
   2  13  -2   87.62    2.82
  -1  13   2    0.81    0.98
   1  13  -2    0.59    0.93
  -1  13   2    0.79    1.36
   1  13  -2    0.69    0.96
   0  13  -2   81.11    3.49
   0  13  -2   79.69    3.17
   0  13   2   90.62    3.52
   0  13   2   83.82    3.10
  -1  13  -2   96.29    3.71
   1  13   2   93.87    4.01
  -1  13  -2   97.86    3.47
   1  13   2   92.31    3.12
   2  13   2   16.63    2.12
  -2  13  -2   17.92    2.06
   2  13   2   22.71    1.82
  -2  13  -2   18.99    1.83
   3  13   2   60.25    2.22
   3  13   2   59.51    2.97
   3  13   2   62.49    3.96
  -3  13  -2   59.86    3.24
  -4  13  -2   19.72    2.38
   4  13   2   19.37    2.64
   4  13   2   16.03    1.87
   5 -13   2   20.69    2.96
  -5  13  -2   30.73    2.94
   5  13   2   21.63    2.20
   5  13   2   16.96    2.80
   6 -13   2   31.10    3.09
   6 -13   2   35.32    3.35
  -6  13  -2   38.84    3.31
   6  13   2   31.04    3.36
   6  13   2   38.10    2.98
   7 -13   2   12.92    2.75
  -7  13  -2    9.51    2.40
   7  13   2    8.26    2.53
   7  13   2    7.98    1.98
   8 -13   2    8.46    2.68
  -8  13  -2   12.24    2.53
   8  13   2    7.69    2.53
   8  13   2   11.89    2.26
   9 -13   2   -0.65    2.29
   9  13   2   -0.66    2.18
  -9  13  -2   -1.32    2.19
   9  13   2    1.31    1.74
  10 -13   2   -4.01    2.18
  10  13   2    0.33    1.91
 -10  13  -2   -0.36    2.25
  10  13   2   -0.59    2.62
  11 -14  -2    5.08    2.78
  11  14  -2    3.71    2.40
 -11  14   2    0.41    2.68
  10 -14  -2   -5.38    2.02
 -10  14   2   -3.46    2.23
  10  14  -2    0.50    1.96
  10  14  -2    0.17    1.77
   9 -14  -2   10.04    2.60
  -9  14   2    4.72    2.42
   9  14  -2    5.44    1.99
   9  14  -2    6.28    2.20
   8 -14  -2   -1.56    2.15
  -8  14   2   -0.22    2.17
   8  14  -2    0.74    1.55
   8  14  -2    0.34    1.68
   7 -14  -2    0.22    2.15
   7  14  -2   -0.37    1.51
   7  14  -2   -0.39    1.41
  -7  14   2    0.77    2.15
   6 -14  -2    2.96    2.12
   6  14  -2    1.82    1.55
   6  14  -2   -1.11    1.44
  -6  14   2    2.77    2.44
   5 -14  -2    7.61    2.56
  -5  14   2    6.20    2.39
   5  14  -2    4.56    1.67
   5  14  -2    3.56    1.52
  -4  14   2   59.03    3.84
  -4  14   2   57.27    2.09
   4  14  -2   56.27    3.43
   4  14  -2   59.02    1.87
   4  14  -2   60.67    3.56
  -3  14   2   75.17    2.61
  -3  14   2   74.51    3.51
   3  14  -2   77.34    3.68
   3  14  -2   73.74    2.40
   2  14  -2   29.77    2.44
   2  14  -2   30.22    1.79
  -2  14   2   28.89    2.39
  -2  14   2   31.62    1.86
   1  14  -2    8.03    1.45
  -1  14   2    8.83    1.70
  -1  14   2    9.15    1.36
   1  14  -2    8.15    1.25
   0  14   2   36.01    2.42
   0  14   2   36.61    2.53
   0  14  -2   34.39    2.35
   0  14  -2   36.10    2.49
   1  14   2    2.57    1.22
   1  14   2    2.98    1.40
  -1  14  -2    1.18    1.20
  -1  14  -2    0.85    1.09
  -2  14  -2    8.36    1.71
   2  14   2   10.08    1.36
  -2  14  -2    9.05    1.48
   2  14   2    8.47    1.85
   3  14   2    4.91    1.17
  -3  14  -2    5.44    1.91
   3  14   2    4.98    1.79
   4  14   2    4.48    2.10
   4  14   2    3.20    1.38
  -4  14  -2    4.76    2.04
   5 -14   2    3.00    2.57
  -5  14  -2    5.99    1.98
   5  14   2    4.35    1.53
   5  14   2    2.41    2.17
   6 -14   2    4.33    2.37
   6 -14   2    2.00    2.18
   6  14   2    1.67    1.45
  -6  14  -2    0.23    1.82
   6  14   2    1.88    2.04
   7 -14   2    7.95    2.62
   7  14   2    8.22    2.53
   7  14   2    7.42    1.95
  -7  14  -2   12.43    2.56
   8 -14   2    3.19    2.40
   8  14   2    4.27    1.81
   8  14   2    2.20    2.29
  -8  14  -2    0.33    2.02
   9 -14   2    1.40    2.50
   9  14   2   -0.47    2.36
   9  14   2    2.65    1.96
  -9  14  -2   -0.82    2.34
  10 -14   2   -4.18    2.28
  10  14   2   -4.81    2.42
 -10  14  -2    1.25    2.43
  10  14   2    0.86    1.94
  11 -15  -2   -3.68    2.27
 -11  15   2   -2.49    2.43
  11  15  -2    0.59    2.27
  10 -15  -2    5.75    2.74
  10  15  -2    5.18    2.12
 -10  15   2    4.46    2.68
  10  15  -2    5.78    2.41
   9 -15  -2    2.36    2.45
   9  15  -2    1.93    1.93
  -9  15   2   -0.95    2.10
   9  15  -2    0.86    1.79
   8 -15  -2   12.09    2.74
   8  15  -2   10.64    2.35
   8  15  -2    9.06    2.14
  -8  15   2   10.14    2.62
   7 -15  -2   12.46    2.76
   7  15  -2   12.53    2.19
  -7  15   2   16.07    2.80
   6 -15  -2    6.31    2.53
   6  15  -2    3.23    1.69
  -6  15   2    2.05    2.13
   6  15  -2    3.67    1.69
   5 -15  -2   32.40    3.46
   5  15  -2   26.59    2.65
  -5  15   2   32.23    3.25
   5  15  -2   25.73    2.58
   4  15  -2    0.48    1.41
  -4  15   2    0.18    0.73
   4  15  -2    1.14    0.68
  -4  15   2    0.08    2.03
   4  15  -2    0.47    1.41
  -3  15   2    2.40    1.72
  -3  15   2    0.08    0.75
   3  15  -2    1.17    0.83
   3  15  -2   -0.24    1.28
   2  15  -2    4.41    1.31
   2  15  -2    5.95    1.09
  -2  15   2    6.75    1.09
  -2  15   2    9.67    1.92
   1  15  -2   17.93    1.63
  -1  15   2   17.30    1.63
   1  15  -2   15.81    1.86
  -1  15   2   18.12    2.02
   0  15  -2   41.95    2.68
   0  15   2   41.42    2.73
   0  15   2   37.90    2.53
   0  15  -2   35.00    2.46
  -1  15  -2   56.64    3.01
  -1  15  -2   57.31    3.10
   1  15   2   51.41    2.68
   1  15   2   50.85    3.23
   2  15   2   17.94    1.67
  -2  15  -2   17.35    1.86
  -2  15  -2   18.62    2.24
   2  15   2   13.89    2.11
   3  15   2    2.78    1.65
  -3  15  -2    2.72    1.71
   3  15   2    3.38    1.21
   4  15   2    0.96    1.34
  -4  15  -2    1.29    1.80
   4  15   2    2.67    2.00
   5 -15   2    4.60    2.63
   5  15   2    5.03    1.61
   5  15   2    5.83    1.99
  -5  15  -2    7.44    2.20
   6 -15   2   10.54    2.54
   6 -15   2    4.71    2.48
  -6  15  -2    5.64    2.13
   6  15   2    5.90    1.71
   6  15   2    2.26    2.09
   7 -15   2    4.95    2.47
   7  15   2    1.33    1.59
   7  15   2    4.75    2.31
  -7  15  -2    4.50    2.26
   8 -15   2   -0.86    2.32
  -8  15  -2    1.24    2.07
   8  15   2    1.01    1.66
   8  15   2    0.55    2.22
   9 -15   2    2.99    2.61
   9  15   2    7.09    2.19
  -9  15  -2    3.22    2.44
   9  15   2    3.90    2.78
  10 -15   2    3.15    2.72
  10  15   2    0.07    2.52
  10  15   2    4.43    2.12
 -10  15  -2    1.35    2.50
  11 -16  -2   19.43    3.67
  11  16  -2   24.68    3.51
 -11  16   2   22.22    3.60
  10 -16  -2   -3.48    2.29
 -10  16   2   -3.30    2.52
  10  16  -2    2.33    2.04
  10  16  -2    0.85    2.02
   9 -16  -2    6.55    2.70
   9  16  -2    8.42    2.28
  -9  16   2    4.95    2.48
   9  16  -2    5.72    2.08
   8 -16  -2   -0.61    2.30
   8  16  -2   -0.96    1.70
  -8  16   2   -1.09    2.11
   8  16  -2   -0.74    1.67
   7 -16  -2    6.39    2.59
   7  16  -2    5.50    1.92
  -7  16   2    3.61    2.38
   7  16  -2    5.35    1.90
   6 -16  -2    4.57    2.48
   6  16  -2    4.21    1.73
  -6  16   2    8.35    2.54
   6  16  -2    4.26    1.66
   5 -16  -2    3.12    2.40
   5  16  -2    1.96    1.65
  -5  16   2    0.42    2.38
   5  16  -2    1.87    1.65
  -4  16   2    3.94    2.08
   4  16  -2    1.87    1.52
   4  16  -2    0.30    0.69
  -4  16   2    1.09    0.82
   3  16  -2   30.95    1.84
  -3  16   2   30.05    2.83
   3  16  -2   30.59    2.76
  -3  16   2   29.30    1.83
   2  16  -2   37.09    2.81
  -2  16   2   37.64    2.19
   2  16  -2   35.32    2.17
  -2  16   2   31.17    2.64
   1  16  -2   96.04    3.38
  -1  16   2   98.96    3.92
   1  16  -2   99.35    4.19
  -1  16   2   97.88    3.73
   0  16  -2    1.20    1.26
   0  16   2    2.95    1.31
   0  16  -2    1.50    1.35
   0  16   2    2.62    1.55
   1  16   2   76.84    3.90
  -1  16  -2   76.72    3.59
  -1  16  -2   78.56    3.59
   1  16   2   77.21    3.21
  -2  16  -2   11.00    2.09
  -2  16  -2    9.24    1.61
   2  16   2    8.80    1.53
   2  16   2    7.39    1.76
  -3  16  -2    1.85    1.43
  -3  16  -2    2.38    1.79
   3  16   2    1.54    1.63
   3  16   2    2.54    1.19
   4  16   2    1.42    1.98
  -4  16  -2   -1.47    1.78
   5 -16   2    9.03    2.76
   5  16   2    6.53    2.18
   5  16   2    5.38    1.71
  -5  16  -2    5.92    2.13
   6 -16   2    3.14    2.46
   6  16   2    3.87    1.72
   6  16   2    3.60    1.93
  -6  16  -2    5.62    2.16
   7 -16   2   67.19    5.09
   7  16   2   58.90    4.01
   7  16   2   55.04    4.61
   8 -16   2   17.53    3.27
   8  16   2   18.23    2.58
  -8  16  -2   17.38    2.93
   8  16   2   14.65    3.06
   9 -16   2   -0.19    2.50
  -9  16  -2   -0.47    2.22
   9  16   2    1.49    1.79
   9  16   2    2.32    2.58
  10 -16   2   -1.75    2.40
 -10  16  -2    3.11    2.75
  10  16   2    0.74    2.59
  10  16   2    5.79    2.29
  11 -17  -2    0.28    2.60
  11  17  -2    2.84    2.31
 -11  17   2   -2.16    2.66
  10 -17  -2   14.84    3.43
  10  17  -2   17.03    3.03
 -10  17   2   14.78    3.21
  10  17  -2   16.20    2.90
   9 -17  -2    0.71    2.46
  -9  17   2    0.88    2.39
   9  17  -2    2.03    1.90
   9  17  -2    0.69    1.91
   8 -17  -2    5.49    2.74
  -8  17   2    5.52    2.28
   8  17  -2    6.50    2.12
   8  17  -2    4.05    1.95
   7 -17  -2    0.64    2.15
   7  17  -2    0.69    1.66
  -7  17   2    1.49    2.32
   7  17  -2   -0.69    1.64
   6 -17  -2    1.55    2.30
   6  17  -2    1.58    1.58
   6  17  -2    0.14    1.56
  -6  17   2    2.07    2.11
   5 -17  -2   18.33    3.23
  -5  17   2   19.40    3.04
   5  17  -2   14.65    2.30
   5  17  -2   15.23    2.33
   4  17  -2    5.57    0.90
   4  17  -2    6.29    1.81
  -4  17   2    4.85    1.00
  -4  17   2    6.51    2.40
  -3  17   2   24.30    2.78
  -3  17   2   22.07    1.83
   3  17  -2   24.91    1.80
   3  17  -2   18.55    2.30
   2  17  -2    3.97    1.55
  -2  17   2    1.91    1.08
   2  17  -2    4.05    1.20
  -2  17   2    3.96    1.98
  -1  17   2    1.24    1.13
   1  17  -2   -1.66    1.20
   1  17  -2    1.06    1.18
  -1  17   2    1.81    1.74
   0  17   2   30.45    2.70
   0  17  -2   26.34    2.51
   0  17   2   26.73    2.24
   0  17  -2   30.66    2.61
   1  17   2   34.86    2.59
  -1  17  -2   31.79    2.62
   1  17   2   24.45    2.37
  -1  17  -2   34.50    2.62
  -2  17  -2    3.99    1.90
   2  17   2    2.42    1.39
  -2  17  -2    0.56    1.27
   2  17   2    2.55    1.59
  -3  17  -2   24.59    2.70
  -3  17  -2   29.42    2.70
   3  17   2   27.53    2.02
   3  17   2   27.26    2.82
  -4  17  -2    8.24    2.19
   4  17   2   11.96    2.39
   5 -17   2    3.00    2.52
   5  17   2    1.55    1.54
  -5  17  -2    3.14    1.87
   5  17   2    0.32    1.91
   6 -17   2    5.12    2.43
  -6  17  -2    4.57    2.17
   6  17   2    7.45    1.95
   6  17   2    5.13    2.11
   7 -17   2   -2.90    2.28
   7  17   2    0.72    1.58
   7  17   2   -0.72    2.06
  -7  17  -2   -2.59    1.95
   8 -17   2    7.89    2.85
   8  17   2   10.93    2.94
   8  17   2    9.96    2.31
  -8  17  -2    5.41    2.41
   9 -17   2    7.34    3.12
  -9  17  -2   16.70    3.17
   9  17   2   10.62    2.54
   9  17   2    7.71    2.91
  10 -17   2   -4.62    2.37
 -10  17  -2   -0.68    2.43
  10  17   2    1.28    2.10
  10  17   2   -1.89    2.47
  11 -18  -2   -2.77    2.50
  11  18  -2    1.85    2.23
 -11  18   2    0.17    2.93
  10 -18  -2   -1.82    2.58
  10  18  -2    0.73    1.98
  10  18  -2   -1.16    1.89
 -10  18   2   -4.70    2.55
   9 -18  -2   -3.32    2.37
   9  18  -2    1.05    1.86
  -9  18   2   -2.68    2.24
   9  18  -2    0.89    1.96
   8 -18  -2    2.16    2.55
   8  18  -2    0.98    1.82
  -8  18   2    2.89    2.19
   8  18  -2    3.72    2.00
   7 -18  -2    4.45    2.61
   7  18  -2    8.48    2.24
   7  18  -2    6.80    2.04
  -7  18   2    6.98    2.43
   6 -18  -2    6.42    2.64
  -6  18   2    6.16    2.50
   6  18  -2    6.49    1.91
   6  18  -2    5.43    1.80
   5 -18  -2    2.90    2.69
   5  18  -2    1.48    1.63
  -5  18   2    0.48    2.34
   4  18  -2   24.08    2.59
  -4  18   2   30.81    3.27
  -4  18   2   28.60    1.87
   3  18  -2   36.67    2.95
  -3  18   2   33.09    2.13
   3  18  -2   35.22    2.07
  -3  18   2   33.11    3.08
   2  18  -2   -0.37    1.37
  -2  18   2    2.62    1.17
   2  18  -2    3.33    1.22
  -2  18   2    4.84    2.08
   1  18  -2    1.89    1.37
  -1  18   2    0.85    1.28
   1  18  -2    2.98    1.40
  -1  18   2    2.58    1.83
   0  18  -2   27.08    2.35
   0  18  -2   29.37    2.69
   0  18   2   36.44    2.89
   0  18   2   31.60    2.51
  -1  18  -2   13.97    1.97
   1  18   2   15.46    1.93
  -1  18  -2   16.07    2.08
   1  18   2   11.64    1.91
   2  18   2   10.02    1.66
  -2  18  -2    9.27    1.69
   2  18   2   10.04    1.99
  -2  18  -2    9.72    2.16
  -3  18  -2   13.24    2.31
  -3  18  -2   10.20    1.80
   3  18   2   12.00    2.35
  -4  18  -2    0.37    1.82
   4  18   2    2.41    1.95
   5 -18   2    0.89    2.54
  -5  18  -2    0.91    1.79
   5  18   2    4.05    2.14
   6 -18   2   -1.44    2.18
  -6  18  -2    3.25    2.15
   6  18   2    0.99    1.89
   6  18   2   -0.77    1.61
   7 -18   2   -1.92    2.35
   7  18   2    0.97    1.71
  -7  18  -2   -1.09    2.07
   7  18   2   -0.62    2.06
   8 -18   2   -1.57    2.38
   8  18   2    4.99    2.59
  -8  18  -2    0.44    2.26
   8  18   2    2.08    1.86
   9 -18   2   -1.48    2.44
   9  18   2   -2.38    2.48
   9  18   2    0.24    1.99
  -9  18  -2   -1.49    2.48
  10 -19  -2   -5.01    2.40
 -10  19   2   -4.14    2.49
  10  19  -2   -0.23    2.09
  10  19  -2   -0.48    2.11
   9 -19  -2    6.10    2.96
   9  19  -2    1.73    2.04
   9  19  -2    1.06    2.09
  -9  19   2    0.43    2.45
   8 -19  -2   11.37    3.09
  -8  19   2   13.10    2.89
   8  19  -2   15.90    2.71
   8  19  -2   15.67    2.74
   7 -19  -2   32.99    3.83
   7  19  -2   39.68    3.63
  -7  19   2   31.33    3.60
   7  19  -2   34.24    3.50
   6 -19  -2    1.35    2.50
  -6  19   2    0.29    2.13
   6  19  -2   -0.28    1.45
   6  19  -2   -0.35    1.68
   5 -19  -2   27.62    3.47
   5  19  -2   20.62    2.54
  -5  19   2   21.81    3.03
   4  19  -2    3.87    1.80
  -4  19   2    4.11    2.23
  -4  19   2    1.67    1.00
  -3  19   2   13.50    1.52
   3  19  -2   13.75    1.44
  -3  19   2   17.47    2.60
   3  19  -2   13.62    2.23
   2  19  -2   75.85    3.09
  -2  19   2   78.31    3.88
   2  19  -2   66.78    3.97
  -2  19   2   72.91    3.31
   1  19  -2   17.03    2.23
   1  19  -2   20.57    1.99
  -1  19   2   21.41    2.38
  -1  19   2   17.10    1.93
   0  19  -2    2.09    1.48
   0  19  -2   -1.06    1.47
   0  19   2    1.39    1.65
   0  19   2   -0.63    1.29
   1  19   2    6.77    1.75
  -1  19  -2    7.42    1.92
   1  19   2    4.15    1.73
  -1  19  -2    2.14    1.49
   2  19   2   10.24    2.16
  -2  19  -2    8.46    2.04
  -2  19  -2    6.14    1.71
   2  19   2    9.85    1.69
   3  19   2    3.33    1.84
  -3  19  -2    2.62    2.14
  -3  19  -2    3.44    1.53
   4  19   2    2.18    1.91
  -4  19  -2    0.77    2.00
   5  19   2    7.45    2.19
  -5  19  -2   11.49    2.47
   6 -19   2   15.95    3.23
  -6  19  -2   10.62    2.54
   6  19   2   13.99    2.82
   7 -19   2   -0.99    2.44
   7  19   2   -0.80    1.64
   7  19   2    2.61    2.28
  -7  19  -2   -1.52    2.14
   8 -19   2   -4.54    2.35
   8  19   2   -0.98    1.70
   8  19   2   -1.70    2.29
  -8  19  -2   -1.98    2.19
   9 -19   2    0.18    2.66
  -9  19  -2   -0.86    2.40
   9  19   2   -2.03    1.95
   9  19   2    0.98    2.57
  10 -20  -2   -1.45    2.58
  10  20  -2    1.81    2.25
  10  20  -2    1.86    2.07
 -10  20   2    2.66    2.79
   9 -20  -2    8.40    3.12
  -9  20   2   13.59    3.16
   9  20  -2   11.39    2.70
   9  20  -2   11.35    2.78
   8 -20  -2    3.05    2.65
   8  20  -2    0.21    1.90
   8  20  -2    1.00    1.79
  -8  20   2   -0.70    2.35
   7 -20  -2    1.16    2.36
   7  20  -2    2.60    1.99
   7  20  -2    2.13    1.85
  -7  20   2    0.64    2.42
   6 -20  -2   -0.49    2.56
  -6  20   2    0.25    2.32
   6  20  -2    3.06    1.90
   5 -20  -2    0.49    2.30
  -5  20   2    2.35    2.10
   5  20  -2    0.74    1.63
  -4  20   2    2.08    2.26
   4  20  -2    1.96    1.52
   3  20  -2    0.09    1.06
   3  20  -2    0.23    1.65
  -3  20   2    5.75    2.49
  -3  20   2    0.78    1.09
  -2  20   2   14.84    1.78
   2  20  -2   14.78    2.23
  -2  20   2   16.14    2.44
   2  20  -2   14.19    1.76
   1  20  -2   22.70    2.53
  -1  20   2   31.30    2.55
   1  20  -2   26.78    2.25
  -1  20   2   24.73    2.65
   0  20   2    7.57    1.75
   0  20  -2    4.25    1.66
   0  20  -2    5.45    1.78
   0  20   2    8.84    1.97
   1  20   2   16.84    2.08
  -1  20  -2   17.60    2.39
  -1  20  -2   16.87    2.14
   1  20   2   14.08    2.24
  -2  20  -2   22.19    2.38
  -2  20  -2   24.58    2.79
   2  20   2   27.33    2.87
   2  20   2   25.97    2.18
   3  20   2    0.89    1.85
  -3  20  -2    2.78    2.03
  -3  20  -2    2.75    1.43
   4  20   2   60.91    4.47
  -4  20  -2   65.77    4.21
   5  20   2   46.54    4.00
  -5  20  -2   49.69    3.97
   6 -20   2    1.76    2.76
  -6  20  -2    7.32    2.46
   6  20   2    1.28    2.26
   7 -20   2   11.50    2.94
   7  20   2   13.89    3.07
  -7  20  -2   15.89    3.01
   8 -20   2   -4.27    2.45
  -8  20  -2    1.71    2.46
   8  20   2   -0.33    2.39
   8  20   2    2.05    2.16
   9 -20   2    1.21    2.95
   9  20   2    2.19    2.73
  -9  20  -2    3.35    2.74
   9  20   2    5.52    2.53
  10 -21  -2   -1.80    2.63
  10  21  -2   -0.27    2.21
  10  21  -2    0.14    2.13
 -10  21   2   -1.20    2.70
   9 -21  -2   -3.75    2.53
   9  21  -2    0.16    2.13
  -9  21   2   -3.64    2.16
   9  21  -2   -0.97    1.82
   8 -21  -2    0.63    2.57
   8  21  -2   -0.79    1.75
  -8  21   2   -1.02    2.35
   8  21  -2    1.76    2.11
   7 -21  -2   -0.38    2.66
   7  21  -2    0.21    1.88
  -7  21   2    2.99    2.42
   7  21  -2   -0.54    1.66
   6 -21  -2   -1.46    2.35
  -6  21   2   -0.86    2.29
   6  21  -2    1.14    1.78
  -5  21   2    8.37    2.44
   5  21  -2    6.92    2.04
   4  21  -2    3.21    1.79
  -4  21   2    4.69    2.39
  -3  21   2    3.65    1.24
  -3  21   2    1.36    2.39
   3  21  -2    1.37    1.54
   3  21  -2    0.08    1.11
   2  21  -2   12.55    1.76
  -2  21   2   12.42    1.80
   2  21  -2   15.41    2.32
  -2  21   2   14.43    2.42
  -1  21   2   -1.15    1.99
   1  21  -2    0.83    1.46
  -1  21   2    2.11    1.42
   1  21  -2   -0.11    1.52
   0  21   2    6.81    2.00
   0  21  -2    7.94    1.93
   0  21  -2    6.44    1.81
   0  21   2    4.66    1.69
  -1  21  -2    1.45    1.52
   1  21   2    1.62    1.81
  -1  21  -2    1.60    1.83
   1  21   2    1.56    1.71
  -2  21  -2    2.94    1.62
   2  21   2    2.24    1.66
   2  21   2    3.47    1.95
  -2  21  -2    1.06    1.98
   3  21   2    2.53    1.87
  -3  21  -2    1.36    2.00
  -3  21  -2    1.82    1.47
   4  21   2   12.56    2.50
  -4  21  -2   16.67    2.58
   5  21   2    4.89    2.16
  -5  21  -2    7.55    2.28
   6 -21   2   -0.84    2.60
   6  21   2   -0.31    2.05
  -6  21  -2   -0.21    2.10
   7 -21   2    1.29    2.71
   7  21   2    0.06    2.22
  -7  21  -2   -0.10    2.29
   8 -21   2    2.48    2.77
  -8  21  -2    1.05    2.44
   8  21   2   -1.95    2.30
   9 -21   2   -0.64    2.93
   9  21   2   -1.20    2.22
  -9  21  -2   -4.09    2.38
   9  21   2   -1.26    2.66
  10 -22  -2   -1.37    2.69
  10  22  -2    0.80    2.55
  10  22  -2    1.95    2.38
 -10  22   2   -3.46    2.66
   9 -22  -2   -0.73    2.70
   9  22  -2   -4.48    1.96
  -9  22   2   -0.59    2.41
   9  22  -2    0.61    2.02
   8 -22  -2    0.36    2.72
  -8  22   2    5.87    2.72
   8  22  -2    4.13    2.36
   8  22  -2    3.94    2.23
   7 -22  -2    1.62    2.49
   7  22  -2    7.80    2.34
  -7  22   2    5.10    2.62
   6 -22  -2    2.04    2.83
  -6  22   2   -0.18    2.20
   6  22  -2   -0.13    1.59
  -5  22   2   -0.86    2.12
   5  22  -2   -0.35    1.66
  -4  22   2    3.68    2.40
   4  22  -2    0.62    1.59
   3  22  -2    1.58    1.23
   3  22  -2    3.65    1.82
  -3  22   2    2.85    2.35
  -3  22   2    1.40    1.14
   2  22  -2    7.08    2.01
  -2  22   2    9.95    1.68
   2  22  -2    6.50    1.59
  -2  22   2    3.43    2.14
   1  22  -2   17.38    2.42
   1  22  -2   15.36    2.10
  -1  22   2   15.23    2.04
  -1  22   2   16.43    2.55
   0  22   2    0.67    1.54
   0  22  -2   -1.28    1.64
   0  22  -2   -0.52    1.47
   0  22   2    5.95    2.19
   1  22   2    0.32    1.80
   1  22   2    0.06    1.59
  -1  22  -2    0.97    1.52
  -1  22  -2   -0.99    1.73
  -2  22  -2   -1.44    1.79
   2  22   2    0.96    1.56
   2  22   2    1.26    1.61
  -2  22  -2    2.05    1.51
  -3  22  -2   14.89    2.04
  -3  22  -2   15.52    2.43
   3  22   2   15.24    2.41
  -4  22  -2   18.73    2.85
   4  22   2   13.27    2.62
   5  22   2    3.29    1.98
  -5  22  -2    0.07    2.14
   6 -22   2   -3.20    2.56
   6  22   2   -0.56    2.06
  -6  22  -2    1.06    1.99
   7 -22   2   -2.07    2.56
   7  22   2    0.17    2.40
  -7  22  -2    4.51    2.63
   8 -22   2   -2.54    2.72
  -8  22  -2   -1.54    2.34
   8  22   2   -1.49    2.33
   9 -22   2    1.39    3.04
   9  22   2    1.61    2.72
  -9  22  -2    3.46    2.80
  10 -23  -2    6.83    3.28
 -10  23   2    5.52    3.23
  10  23  -2    8.71    2.78
  10  23  -2    8.62    2.99
   9 -23  -2   -2.62    2.73
   9  23  -2    2.12    2.18
  -9  23   2    2.68    2.86
   8 -23  -2   17.21    3.63
   8  23  -2   16.20    2.96
  -8  23   2   21.21    3.41
   7 -23  -2    2.67    2.90
  -7  23   2    3.09    2.33
   7  23  -2    6.82    2.28
   6 -23  -2   -1.44    2.79
   6  23  -2    4.27    2.10
  -6  23   2   -0.02    2.45
   5  23  -2    4.15    1.98
  -5  23   2    8.93    2.50
   4  23  -2    1.21    1.71
  -4  23   2   -3.22    2.12
  -3  23   2   47.51    4.00
  -3  23   2   49.59    2.79
   3  23  -2   54.08    3.89
  -2  23   2   94.34    4.15
   2  23  -2   94.77    4.93
   2  23  -2   91.32    3.71
  -2  23   2   93.63    4.79
  -1  23   2    9.03    2.36
  -1  23   2    7.18    1.74
   1  23  -2    7.29    1.97
   1  23  -2    7.17    1.83
   0  23  -2    9.61    2.05
   0  23   2    7.63    1.84
   0  23   2   11.33    2.32
   0  23  -2    6.45    1.88
  -1  23  -2   13.70    2.32
  -1  23  -2   12.44    2.10
   1  23   2   12.30    2.21
   1  23   2   13.21    2.13
   2  23   2    0.46    1.53
  -2  23  -2    0.16    1.34
  -2  23  -2    4.09    2.00
   2  23   2    2.23    1.74
   3  23   2   -0.36    1.77
  -3  23  -2    0.38    1.31
  -3  23  -2    2.15    2.01
   4  23   2    3.24    2.11
  -4  23  -2    3.68    2.24
  -5  23  -2    0.35    1.96
   5  23   2    0.82    2.05
   6 -23   2   -2.44    2.59
   6  23   2    4.00    2.35
  -6  23  -2    3.06    2.38
   7 -23   2   -0.63    2.73
   7  23   2    2.58    2.52
  -7  23  -2   -1.21    2.21
   8 -23   2   -6.24    2.63
  -8  23  -2    0.44    2.49
   8  23   2   -0.98    2.48
   9 -24  -2    1.94    2.99
   9  24  -2    6.13    2.53
  -9  24   2    2.02    2.95
   8 -24  -2   12.81    3.53
   8  24  -2   22.65    3.38
  -8  24   2   23.00    3.58
   7 -24  -2    3.47    2.93
   7  24  -2    4.16    2.17
  -7  24   2    4.75    2.66
   6 -24  -2   -0.87    2.77
   6  24  -2    1.08    1.91
  -6  24   2    1.12    2.49
   5  24  -2    0.07    1.71
  -5  24   2    0.21    2.18
   4  24  -2    1.68    1.79
  -4  24   2   -1.27    2.07
  -3  24   2    2.68    1.26
  -3  24   2   -0.37    2.17
   3  24  -2    0.87    1.65
  -2  24   2    3.97    1.43
  -2  24   2    1.75    2.19
   2  24  -2    3.35    1.66
   2  24  -2    3.86    1.49
   1  24  -2   31.97    2.67
  -1  24   2   38.11    3.11
   1  24  -2   37.03    3.34
  -1  24   2   40.66    3.51
   0  24  -2    1.39    1.66
   0  24   2    0.84    1.78
   0  24   2   -1.12    1.41
   0  24  -2   -1.17    1.35
  -1  24  -2    0.67    1.76
   1  24   2    0.56    1.70
  -1  24  -2    2.13    1.52
   1  24   2    0.19    1.57
  -2  24  -2    2.99    1.62
  -2  24  -2    0.53    1.71
   2  24   2    4.37    1.89
  -3  24  -2    2.12    2.05
   3  24   2    1.14    1.86
  -3  24  -2    0.14    1.37
   4  24   2   20.46    2.95
  -4  24  -2   24.54    2.98
   5  24   2   -1.97    1.87
  -5  24  -2    0.80    2.19
   6 -24   2   -2.15    2.77
  -6  24  -2    2.49    2.19
   6  24   2    2.57    2.33
   7 -24   2   -0.14    2.90
   7  24   2   -1.63    2.07
  -7  24  -2    0.23    2.56
   8 -24   2   -3.09    2.74
  -8  24  -2   -2.76    2.43
   8  24   2   -1.18    2.36
   9 -25  -2   -2.70    2.78
   9  25  -2   -1.39    1.99
  -9  25   2   -1.57    2.82
   8 -25  -2   -1.21    2.59
   8  25  -2    2.03    2.19
  -8  25   2   -0.71    2.66
   7 -25  -2   -3.80    2.70
   7  25  -2   -0.31    1.91
  -7  25   2   -4.75    1.97
   6 -25  -2    6.01    3.16
   6  25  -2    4.33    1.97
  -6  25   2    3.14    2.52
  -5  25   2   12.89    2.77
   5  25  -2   14.70    2.66
   4  25  -2   -0.55    1.52
  -4  25   2    1.28    2.36
   3  25  -2    5.22    1.99
  -3  25   2    6.12    1.44
  -3  25   2    0.24    2.32
   2  25  -2    4.58    1.93
   2  25  -2    6.42    1.62
  -2  25   2   -0.04    2.12
  -2  25   2    3.76    1.47
  -1  25   2    2.80    1.48
   1  25  -2    2.30    1.58
   1  25  -2    1.31    1.64
  -1  25   2    1.83    2.01
   0  25  -2    3.50    1.84
   0  25   2    6.88    2.15
   0  25   2    2.78    1.65
   0  25  -2    4.47    1.80
  -1  25  -2   -0.96    1.71
   1  25   2    1.76    1.69
  -1  25  -2    1.27    1.50
   1  25   2   -1.65    1.69
  -2  25  -2   -0.16    1.88
  -2  25  -2   -0.66    1.44
   2  25   2   -0.36    1.70
   3  25   2    4.03    2.01
  -3  25  -2    3.44    2.03
  -3  25  -2    5.21    1.79
   4  25   2   -1.44    1.84
  -4  25  -2   -0.95    2.09
   5  25   2    3.48    2.28
  -5  25  -2    4.70    2.43
   6 -25   2   -3.70    2.73
  -6  25  -2    0.84    2.39
   6  25   2    3.66    2.32
   7 -25   2    0.63    2.96
  -7  25  -2    1.71    2.45
   7  25   2    0.30    2.41
   8 -25   2    0.96    3.00
  -8  25  -2    1.09    2.61
   8  25   2   -3.20    2.34
   9 -26  -2   -1.47    2.90
   9  26  -2    9.10    2.79
  -9  26   2   -0.47    2.90
   8 -26  -2    1.05    3.09
   8  26  -2    3.97    2.39
  -8  26   2    5.99    2.97
   7 -26  -2   -0.61    2.98
  -7  26   2   -2.49    2.47
   7  26  -2    1.04    2.11
   6 -26  -2   -0.60    2.97
  -6  26   2    1.58    2.28
   6  26  -2    5.64    2.24
   5  26  -2    5.08    2.19
  -5  26   2   11.14    2.66
  -4  26   2    1.01    2.41
   4  26  -2    0.69    1.81
  -3  26   2    2.20    1.33
   3  26  -2    4.42    1.99
  -3  26   2    4.22    2.43
   2  26  -2    3.97    1.58
  -2  26   2    1.48    1.40
  -2  26   2    3.47    2.23
   2  26  -2    4.25    1.94
   1  26  -2   11.50    2.00
  -1  26   2   11.92    2.04
   1  26  -2   10.63    2.23
  -1  26   2   12.50    2.50
   0  26  -2    1.98    1.77
   0  26   2    0.34    1.93
   0  26  -2    2.52    1.72
   0  26   2    0.44    1.54
   1  26   2   47.51    3.73
  -1  26  -2   56.55    3.86
   1  26   2   42.38    3.31
  -1  26  -2   52.05    3.71
  -2  26  -2   19.59    2.44
   2  26   2   16.26    2.62
  -2  26  -2   20.08    2.84
  -3  26  -2    0.93    1.93
  -3  26  -2    0.29    1.52
   3  26   2    0.53    1.88
  -4  26  -2    5.42    2.44
   4  26   2    6.37    2.33
   5  26   2    4.32    2.36
  -5  26  -2    2.50    2.16
   6 -26   2    9.23    3.48
   6  26   2   12.56    2.96
  -6  26  -2   14.51    3.15
   7 -26   2   11.52    3.63
   7  26   2   14.76    3.18
  -7  26  -2   14.12    3.31
   8 -26   2   -0.59    2.96
   8  26   2    1.69    2.51
  -8  26  -2   -1.33    2.62
   9 -27  -2   -3.40    2.79
  -9  27   2   -2.63    2.78
   9  27  -2   -1.76    2.07
   8 -27  -2   -0.99    3.05
   8  27  -2    7.56    2.71
  -8  27   2    6.45    3.10
   7 -27  -2   11.06    3.56
  -7  27   2   10.86    3.10
   7  27  -2   10.41    2.77
   6 -27  -2    1.09    3.09
   6  27  -2    4.70    2.31
  -6  27   2    2.58    2.64
   5  27  -2   14.74    2.77
  -5  27   2   16.97    2.92
   4  27  -2    7.30    2.22
  -4  27   2    5.92    2.62
   3  27  -2    1.98    1.86
  -3  27   2   -2.58    2.15
   2  27  -2   27.37    2.55
  -2  27   2   31.49    3.29
  -2  27   2   30.82    2.81
   2  27  -2   24.93    3.08
   1  27  -2   -0.86    1.60
  -1  27   2    1.80    2.00
  -1  27   2    0.99    1.55
   1  27  -2    0.86    1.67
   0  27   2   20.47    2.57
   0  27  -2   20.76    2.60
   0  27  -2   26.55    3.00
   0  27   2   23.47    2.76
   1  27   2   23.21    2.86
  -1  27  -2   28.42    3.01
   1  27   2   27.16    2.66
  -1  27  -2   24.73    2.82
  -2  27  -2   15.51    2.69
  -2  27  -2   13.21    2.26
   2  27   2   15.63    2.63
  -3  27  -2   10.30    2.47
   3  27   2    9.97    2.43
  -3  27  -2   10.26    2.07
  -4  27  -2    3.37    2.41
   4  27   2    0.97    2.05
  -5  27  -2    4.23    2.60
   5  27   2    4.27    2.37
   6 -27   2   -2.78    3.05
  -6  27  -2   -1.53    2.43
   6  27   2    4.13    2.36
   7 -27   2   -0.95    3.01
  -7  27  -2   -1.09    2.55
   7  27   2    3.03    2.60
   8 -28  -2    0.05    3.12
  -8  28   2   -1.70    2.78
   8  28  -2    1.14    2.29
   7 -28  -2   -4.38    2.92
  -7  28   2   -3.40    2.28
   7  28  -2    3.39    2.40
   6 -28  -2    2.31    3.29
  -6  28   2    4.00    2.76
   6  28  -2   -0.54    2.01
  -5  28   2   -1.25    2.14
   5  28  -2   -1.11    1.57
   4  28  -2    0.78    1.67
  -4  28   2    1.53    2.13
   3  28  -2    0.86    1.88
  -3  28   2   -0.11    2.29
  -2  28   2    1.75    1.45
  -2  28   2   -0.80    2.18
   2  28  -2   -0.73    1.73
   1  28  -2    2.46    1.87
  -1  28   2    1.91    2.11
  -1  28   2    3.62    1.69
   1  28  -2    1.77    1.81
   0  28   2    0.49    1.57
   0  28   2    1.04    1.87
   0  28  -2   -1.00    1.68
   0  28  -2    1.36    1.72
  -1  28  -2    5.75    1.92
   1  28   2    7.83    2.17
  -1  28  -2    3.39    2.10
   2  28   2    3.78    2.00
  -2  28  -2    2.76    1.98
  -2  28  -2    2.20    1.68
  -3  28  -2    2.34    2.23
  -3  28  -2    1.07    1.60
   3  28   2    1.93    1.97
   4  28   2    3.91    2.23
  -4  28  -2    1.20    2.33
  -5  28  -2   -2.20    2.30
   5  28   2   -1.13    1.98
   6 -28   2   -0.68    3.12
  -6  28  -2   -0.98    2.29
   6  28   2   -0.95    2.20
   7 -28   2    0.29    3.25
  -7  28  -2    3.75    2.61
   7  28   2    5.25    2.67
   8 -29  -2    0.81    3.25
  -8  29   2   -0.82    2.81
   8  29  -2    4.04    2.55
   7 -29  -2    1.08    3.38
  -7  29   2    7.56    3.13
   7  29  -2   10.45    2.87
   6 -29  -2   -2.00    3.21
  -6  29   2   -2.67    2.61
   6  29  -2    0.27    1.87
  -5  29   2   12.05    2.87
   5  29  -2   13.39    2.78
  -4  29   2   -0.33    2.26
   4  29  -2   -0.35    1.88
  -3  29   2    5.08    2.42
   3  29  -2    7.93    2.24
  -2  29   2   10.21    2.01
  -2  29   2   10.31    2.59
   2  29  -2   12.00    2.50
   1  29  -2   13.46    2.22
  -1  29   2    8.22    2.38
   1  29  -2   11.87    2.40
  -1  29   2   12.20    2.19
   0  29  -2    3.81    1.87
   0  29  -2   -0.10    1.76
   0  29   2    1.80    1.71
   0  29   2    0.77    1.98
  -1  29  -2   35.65    3.45
  -1  29  -2   31.52    3.28
   1  29   2   41.30    3.76
  -2  29  -2    8.40    2.47
  -2  29  -2   11.23    2.17
   2  29   2   12.61    2.58
  -3  29  -2   -0.23    2.08
  -3  29  -2    1.27    1.64
   3  29   2   -1.88    1.73
   4  29   2   -0.39    1.84
  -4  29  -2    1.05    2.39
  -5  29  -2    2.44    2.63
   5  29   2    0.56    2.25
   6 -29   2   -2.92    3.17
   6  29   2    2.04    2.22
  -6  29  -2   -2.38    2.48
   7 -29   2   -2.89    3.11
  -7  29  -2    3.56    2.85
   7  29   2    3.13    2.60
   8 -30  -2    6.12    3.52
   8  30  -2    8.60    2.91
  -8  30   2    7.72    3.26
   7 -30  -2   -4.07    3.13
   7  30  -2    2.17    2.27
  -7  30   2   -1.10    2.76
   6 -30  -2   -5.07    3.17
  -6  30   2   -1.93    2.58
   6  30  -2   -0.74    2.06
  -5  30   2   -1.73    2.24
   5  30  -2   -0.17    2.02
  -4  30   2    1.13    2.45
   4  30  -2   -1.12    1.79
  -3  30   2    1.34    2.31
   3  30  -2    0.34    1.88
  -2  30   2    8.16    1.89
   2  30  -2    8.81    2.37
  -2  30   2    4.07    2.36
  -1  30   2   15.46    2.68
   1  30  -2   18.55    2.53
   1  30  -2   19.79    2.95
  -1  30   2   18.38    2.48
   0  30   2    2.15    1.87
   0  30  -2    0.26    1.92
   0  30   2   -2.61    1.91
   0  30  -2    2.62    1.84
   1  30   2   10.32    2.32
  -1  30  -2   10.18    2.23
  -1  30  -2   11.23    2.48
  -2  30  -2    4.79    1.90
   2  30   2    4.46    2.06
  -2  30  -2    5.43    2.37
  -3  30  -2   -0.25    2.26
   3  30   2   -0.87    1.87
  -3  30  -2   -0.78    1.59
  -4  30  -2   14.19    3.18
   4  30   2   13.68    2.84
  -5  30  -2    3.75    2.79
   5  30   2    3.25    2.43
   6 -30   2   -1.08    3.36
   6  30   2    0.25    2.39
  -6  30  -2   -3.97    2.48
   7 -31  -2   -7.24    3.08
  -7  31   2   -2.10    2.50
   7  31  -2   -0.15    2.20
   6 -31  -2   -3.12    3.37
  -6  31   2    5.14    3.03
   6  31  -2    2.73    2.36
   5  31  -2   10.04    2.78
  -5  31   2   10.75    2.92
   4  31  -2   -1.12    1.70
  -4  31   2   -2.77    2.37
   3  31  -2    1.64    2.04
  -3  31   2    1.11    2.26
   2  31  -2    4.41    2.10
  -2  31   2    2.56    1.63
  -2  31   2   -2.32    2.12
  -1  31   2    0.16    1.63
   1  31  -2    0.81    1.83
   1  31  -2   -0.81    1.75
  -1  31   2    0.71    2.09
   0  31  -2    6.19    2.14
   0  31   2    3.93    1.89
   0  31  -2    3.18    2.00
   0  31   2    0.21    2.09
  -1  31  -2    7.93    2.35
  -1  31  -2    5.30    2.03
   1  31   2    5.66    2.16
  -2  31  -2   -0.29    1.55
   2  31   2    1.38    1.96
  -2  31  -2    0.96    2.18
  -3  31  -2   -3.27    2.18
  -3  31  -2    1.20    1.76
   3  31   2   -0.71    1.96
  -4  31  -2   -0.48    2.49
   4  31   2   -2.03    2.01
  -5  31  -2    4.26    2.85
   5  31   2    0.35    2.28
   6 -31   2   -7.10    3.13
   6  31   2    1.39    2.43
  -6  31  -2   -1.57    2.53
   7 -32  -2   -3.29    3.42
   7  32  -2   -2.29    2.15
  -7  32   2   -1.40    2.84
   6 -32  -2   -4.45    3.30
  -6  32   2   -4.85    2.36
   6  32  -2    3.92    2.44
  -5  32   2   -3.62    2.52
   5  32  -2    1.94    2.07
   4  32  -2    4.03    2.34
  -4  32   2   -0.13    2.57
   3  32  -2    5.39    2.36
  -3  32   2    1.17    2.44
  -2  32   2   -3.06    2.07
   2  32  -2    2.97    2.08
  -1  32   2    5.67    1.88
   1  32  -2    6.97    2.29
  -1  32   2    5.33    2.44
   0  32  -2    3.68    1.93
   0  32   2    2.17    1.84
   0  32  -2   -1.88    1.95
   1  32   2    1.65    1.93
  -1  32  -2   -1.68    2.00
  -1  32  -2    3.06    1.84
  -2  32  -2    2.15    1.81
  -2  32  -2    1.95    2.22
   2  32   2    3.03    2.13
  -3  32  -2   -3.70    2.20
   3  32   2    0.08    2.04
  -4  32  -2   -0.45    2.34
   4  32   2    0.48    2.23
  -5  32  -2   -1.05    2.32
   5  32   2    1.73    2.44
   6 -32   2   -5.80    3.19
   6  32   2   -0.69    2.27
  -6  32  -2   -1.90    2.53
   6 -33  -2   -6.38    3.35
  -6  33   2    0.10    2.71
   6  33  -2   -1.81    2.04
  -5  33   2    8.48    3.29
   5  33  -2   14.14    3.10
  -4  33   2    7.25    2.99
   4  33  -2   12.19    3.01
  -3  33   2    1.79    2.54
   3  33  -2    2.40    2.22
  -2  33   2    7.61    2.66
   2  33  -2    6.98    2.38
   1  33  -2    0.15    1.94
  -1  33   2    0.32    2.34
  -1  33   2    2.17    1.81
   0  33  -2    5.84    2.20
   0  33  -2    1.35    2.08
   0  33   2    2.73    2.06
  -1  33  -2    9.06    2.68
   1  33   2   10.32    2.48
  -1  33  -2   11.29    2.44
  -2  33  -2   -3.88    2.07
  -2  33  -2    1.56    1.87
   2  33   2   -1.01    1.92
  -3  33  -2    3.78    2.68
   3  33   2    4.30    2.41
  -4  33  -2   -2.26    2.48
   4  33   2    1.28    2.31
  -5  33  -2   -0.22    2.62
   5  33   2    0.95    2.37
   6 -34  -2   -3.77    3.50
  -6  34   2   -1.41    2.59
   6  34  -2    0.16    2.22
   5  34  -2    5.03    2.55
  -5  34   2   -2.40    2.85
  -4  34   2    1.87    2.89
   4  34  -2    9.89    2.87
  -3  34   2    0.76    2.63
   3  34  -2    2.38    2.19
   2  34  -2   -1.03    1.99
  -2  34   2    0.33    2.48
  -1  34   2   -0.93    2.38
  -1  34   2    0.89    1.83
   1  34  -2    0.09    1.94
   0  34   2    4.03    2.04
   0  34  -2   -1.69    2.16
   0  34  -2    5.57    2.35
  -1  34  -2   10.80    2.48
  -1  34  -2    4.16    2.47
   1  34   2    5.12    2.27
   2  34   2    3.52    2.22
  -2  34  -2   -0.49    2.28
  -2  34  -2    2.49    1.93
  -3  34  -2   -3.75    2.22
   3  34   2   -0.06    2.12
  -4  34  -2    7.31    2.97
   4  34   2   10.47    2.92
  -5  34  -2   -3.42    2.53
   5  34   2   -2.23    2.15
  -5  35   2   -2.30    2.81
   5  35  -2    3.29    2.54
   4  35  -2    1.94    2.34
  -4  35   2   -1.98    2.73
   3  35  -2   -1.28    1.96
  -3  35   2   -1.68    2.60
   2  35  -2    1.63    2.26
  -2  35   2   -3.27    2.55
  -1  35   2    0.24    1.68
   1  35  -2   -0.16    2.01
  -1  35   2   -1.61    2.28
   0  35  -2    9.25    2.59
   0  35   2    6.76    2.37
   0  35  -2    6.94    2.47
  -1  35  -2   -0.53    2.38
   1  35   2    2.50    2.17
  -1  35  -2    3.43    2.04
  -2  35  -2   -2.22    2.27
   2  35   2    1.13    2.12
  -2  35  -2    3.23    1.97
   3  35   2    1.54    2.30
  -3  35  -2   -1.66    2.38
  -4  35  -2    0.79    2.68
   4  35   2    1.93    2.56
   5  36  -2    7.01    2.75
   4  36  -2   14.29    3.22
  -4  36   2    5.47    2.97
   3  36  -2    1.77    2.30
  -3  36   2    1.00    2.69
  -2  36   2    1.32    2.59
   2  36  -2    1.30    2.16
   1  36  -2    1.86    2.18
   0  36   2    1.99    1.99
   0  36  -2    1.14    2.02
  -1  36  -2    1.06    1.97
   1  36   2    1.26    2.13
  -1  36  -2    0.70    2.31
  -2  36  -2    4.01    2.84
   2  36   2    8.06    2.61
   3  36   2   -2.04    2.08
  -3  36  -2   -4.32    2.36
  -4  37   2    5.53    3.09
   4  37  -2    6.12    2.67
  -3  37   2   -2.34    2.60
   3  37  -2    2.64    2.39
   2  37  -2    5.92    2.59
  -2  37   2    2.82    2.74
   1  37  -2    0.56    2.12
   0  37  -2    4.84    2.39
   0  37   2   10.68    2.62
   1  37   2    5.20    2.29
  -1  37  -2   -4.37    2.08
  -1  37  -2    2.63    2.09
   2  37   2   -0.69    2.04
  -2  37  -2   -1.32    2.40
   3  37   2   -0.76    2.18
   3  38  -2    3.32    2.52
   2  38  -2    0.80    2.30
  -2  38   2   -6.52    2.60
   1  38  -2    1.81    2.27
   0  38   2   -1.83    1.67
   0  38  -2    0.10    2.05
  -1  38  -2    3.64    2.13
   1  38   2    2.32    2.15
  -1  38  -2   -4.70    2.31
   2  38   2    1.79    2.22
  12   0  -3   -0.87    1.93
  11   0  -3    0.78    2.01
  10   0  -3   -1.49    1.71
   9   0  -3   -2.05    1.61
   8   0  -3   -0.94    1.51
  -8   0   3   -1.77    1.62
   7   0  -3   -0.37    1.36
   7   0  -3    0.37    0.99
  -7   0   3    0.66    1.74
   6   0  -3   -0.23    1.32
  -6   0   3   -1.25    1.53
   6   0  -3    0.19    0.83
  -5   0   3   -0.16    1.29
   5   0  -3    0.69    1.09
   5   0  -3   -0.56    0.67
  -4   0   3    7.01    1.32
   3   0  -3   -0.53    0.58
   3   0  -3   -1.46    0.70
  -3   0   3   -1.90    0.89
   2   0  -3    1.02    0.62
   2   0  -3    0.74    0.87
   1   0  -3    0.78    0.78
   1   0  -3   -0.15    0.48
   0   0  -3   -0.52    0.81
   1   0   3    0.62    1.32
   1   0   3   -0.37    0.58
  -1   0  -3    0.79    0.75
   2   0   3    1.44    1.53
   2   0   3    1.94    0.79
  -2   0  -3    2.84    0.96
   3   0   3    0.44    0.99
   3   0   3    3.90    2.03
  -3   0  -3   -0.22    0.92
   4   0   3    1.58    2.26
   4   0   3    0.03    1.15
  -4   0  -3   -0.21    1.03
  -5   0  -3    0.36    1.26
   5   0   3   -0.91    1.35
   5   0   3    2.89    2.65
   6   0   3   -1.87    1.31
   6   0   3    0.40    2.65
  -6   0  -3   -0.92    1.22
   7   0   3   -1.95    2.47
  -7   0  -3    0.84    1.29
   7   0   3   -1.29    1.48
   8   0   3    0.64    1.74
   8   0   3   -0.93    2.56
   9   0   3   -3.95    2.63
   9   0   3    1.00    1.75
  10   0   3   -3.03    1.72
  12  -1  -3    0.03    2.09
  12   1  -3    2.63    2.20
  11  -1  -3    1.11    1.77
  11   1  -3   -1.11    1.89
  10  -1  -3   -0.42    1.65
  10   1  -3   -0.87    1.73
   9  -1  -3   -0.41    1.76
   9   1  -3    1.83    1.80
   8  -1  -3   -0.54    1.38
  -8  -1   3   -1.91    1.51
   8   1  -3    0.00    1.40
  -8   1   3    0.86    1.72
  -7  -1   3    2.00    1.78
   7  -1  -3    1.76    1.49
   7  -1  -3    0.11    0.93
  -7   1   3   -0.70    1.80
   7   1  -3    0.26    1.56
   7   1  -3    0.39    1.07
  -6  -1   3   -0.22    1.62
   6  -1  -3    2.10    1.47
   6  -1  -3    1.06    0.80
   6   1  -3    1.75    0.95
   6   1  -3    2.83    1.46
  -6   1   3    4.20    1.78
  -5  -1   3    1.86    1.19
   5  -1  -3    1.52    1.17
   5  -1  -3    2.10    0.69
   5   1  -3    2.18    0.78
   5   1  -3    0.49    1.03
  -5   1   3    1.45    1.30
   4  -1  -3   27.40    2.18
  -4  -1   3   25.31    1.86
   4  -1  -3   26.69    1.37
  -4   1   3   28.92    2.11
   4   1  -3   25.94    2.19
   4   1  -3   24.23    1.51
  -3  -1   3   81.64    2.76
   3  -1  -3   81.51    2.89
   3  -1  -3   84.54    2.44
   3   1  -3   78.28    2.87
  -3   1   3   79.25    2.81
   3   1  -3   84.08    2.64
   2  -1  -3   38.57    1.79
  -2   1   3   32.58    1.82
   2   1  -3   31.05    1.65
   2   1  -3   36.01    1.77
   2   1  -3   31.22    1.78
   1  -1  -3   44.96    1.98
   1  -1  -3   46.28    1.49
   1   1  -3   47.52    1.60
   1   1  -3   50.81    2.00
   0  -1  -3    9.57    1.13
   0   1  -3   10.28    1.09
  -1  -1  -3    0.64    0.71
   1  -1   3    1.11    0.78
   1   1   3    0.12    0.48
  -1   1  -3    0.41    0.85
   1   1   3   -0.87    1.27
   2  -1   3   63.80    2.46
  -2  -1  -3   57.57    2.34
   2  -1   3   63.20    3.25
   2   1   3   62.88    3.70
   2   1   3   62.97    2.25
  -2   1  -3   63.29    2.52
   3  -1   3   69.46    4.11
   3  -1   3   65.06    2.88
  -3  -1  -3   63.18    2.70
   3   1   3   63.13    4.25
   3   1   3   69.94    2.75
  -3   1  -3   68.50    2.77
  -4  -1  -3   35.39    2.26
   4  -1   3   32.36    3.15
   4  -1   3   33.43    2.69
  -4   1  -3   33.61    2.23
   4   1   3   36.06    2.53
   4   1   3   30.17    3.14
   5  -1   3  126.08    4.87
  -5  -1  -3  131.51    4.25
   5  -1   3  131.21    6.24
   5   1   3  130.59    4.87
   5   1   3  135.60    6.43
  -5   1  -3  128.07    4.37
  -6  -1  -3   19.88    1.96
   6  -1   3   16.53    3.17
   6  -1   3   21.73    2.36
   6   1   3   18.72    3.20
  -6   1  -3   17.76    1.99
   6   1   3   19.99    2.21
   7  -1   3    2.78    2.80
   7  -1   3    7.52    1.91
  -7  -1  -3    6.49    1.53
  -7   1  -3    6.25    1.56
   7   1   3    4.43    1.77
   7   1   3    2.49    2.54
   8  -1   3    9.42    3.07
   8  -1   3    7.62    2.06
   8   1   3    8.58    3.01
   8   1   3    9.51    2.18
   9  -1   3    1.44    1.99
   9   1   3    1.09    2.65
   9   1   3    1.75    1.75
  10  -1   3   -1.60    1.91
  10   1   3   -0.40    1.95
  12  -2  -3    7.50    2.62
  12   2  -3    7.03    2.52
  11  -2  -3    1.81    2.08
  11   2  -3   -0.24    1.90
  10  -2  -3   20.47    3.03
  10   2  -3   23.29    3.10
   9  -2  -3   60.16    4.40
   9   2  -3   55.69    4.25
  -9   2   3   52.93    3.73
  -8  -2   3    1.35    1.63
   8  -2  -3    2.13    1.67
  -8   2   3   -1.51    1.72
   8   2  -3   -1.40    1.43
   7  -2  -3   93.17    4.49
  -7  -2   3   95.58    3.80
   7   2  -3   89.78    3.49
   7   2  -3   84.29    4.50
  -7   2   3   88.53    3.91
   6  -2  -3   17.81    2.14
   6  -2  -3   17.13    1.33
  -6  -2   3   17.98    1.89
   6   2  -3   14.98    1.47
  -6   2   3   16.95    2.21
   6   2  -3   14.23    1.98
  -5  -2   3   29.07    2.13
   5  -2  -3   28.24    2.56
   5  -2  -3   26.20    1.32
  -5   2   3   25.69    2.08
   5   2  -3   32.09    1.83
   5   2  -3   26.48    2.19
   4  -2  -3  197.25    4.63
  -4  -2   3  189.57    4.78
   4  -2  -3  195.59    5.63
   4   2  -3  204.86    5.69
  -4   2   3  200.45    5.19
   4   2  -3  194.81    5.16
  -3  -2   3   66.64    2.38
   3  -2  -3   67.95    2.70
   3   2  -3   70.31    2.46
  -3   2   3   66.80    2.67
   3   2  -3   68.03    2.34
   3   2  -3   69.34    2.71
   2  -2  -3  246.55    5.79
  -2   2   3  242.33    5.69
   2   2  -3  247.98    5.91
   2   2  -3  251.02    5.67
   2   2  -3  243.33    6.11
   1  -2  -3  135.94    3.20
   1  -2  -3  139.83    3.75
   1   2  -3  135.76    3.43
   1   2  -3  141.57    3.72
   1   2  -3  137.38    3.97
   0  -2  -3    1.21    0.79
   0   2   3    0.59    1.40
   0   2  -3    1.83    0.88
  -1  -2  -3   44.55    1.96
  -1   2  -3   46.87    2.20
   1   2   3   43.37    2.83
   1   2   3   46.12    1.44
   2  -2   3    5.27    1.06
  -2  -2  -3   11.55    1.18
   2  -2   3    4.86    1.55
  -2   2  -3    6.15    1.16
   2   2   3    8.16    1.92
   2   2   3    9.11    0.90
  -3  -2  -3    3.03    1.01
   3  -2   3    1.76    1.14
   3  -2   3    3.58    1.89
  -3   2  -3    3.91    1.15
   3   2   3    2.28    1.77
   3   2   3    0.21    0.82
   4  -2   3    3.66    1.38
   4  -2   3    3.54    2.28
  -4  -2  -3    4.22    1.17
  -4   2  -3    2.94    1.25
   4   2   3    4.92    2.42
   4   2   3    5.42    1.24
  -5  -2  -3   -0.06    1.14
   5  -2   3    0.95    2.78
   5  -2   3    0.17    1.45
  -5   2  -3    0.66    1.39
   5   2   3    2.81    2.67
   5   2   3   -0.86    1.27
   6  -2   3    2.12    2.90
  -6  -2  -3    5.69    1.44
   6  -2   3    3.94    1.73
  -6   2  -3    2.50    1.43
   6   2   3    4.68    2.74
   6   2   3    4.82    1.61
   7  -2   3    0.64    2.54
   7  -2   3    0.43    1.56
  -7   2  -3    2.50    1.40
   7   2   3   -0.92    2.38
   7   2   3    2.85    1.59
   8  -2   3    6.43    2.93
   8  -2   3    6.28    2.12
   8   2   3    7.81    2.92
   8   2   3    6.10    1.86
   9  -2   3   18.29    2.87
   9   2   3   12.20    3.33
   9   2   3   16.63    2.70
  10  -2   3   -1.85    2.00
  10   2   3   -1.16    1.83
  12  -3  -3   -0.38    2.07
  12   3  -3   -0.94    1.99
  11  -3  -3    1.33    2.09
  11   3  -3    0.74    1.93
  10  -3  -3    4.46    2.15
  10   3  -3    5.28    2.08
   9  -3  -3    3.40    1.97
   9   3  -3    4.25    1.97
  -9   3   3    5.65    2.10
   8  -3  -3    0.81    1.67
  -8   3   3   -0.82    1.85
   8   3  -3   -0.89    1.09
   8   3  -3    0.89    1.47
   7  -3  -3    1.10    1.56
  -7  -3   3   -0.85    1.55
   7   3  -3    1.87    1.20
   7   3  -3    0.02    1.59
  -7   3   3   -0.71    1.81
   6  -3  -3    0.81    0.60
   6  -3  -3    0.09    1.34
  -6  -3   3   -1.01    1.35
   6   3  -3    0.19    1.34
  -6   3   3    3.99    1.93
   6   3  -3    1.95    1.00
  -5  -3   3   30.16    2.07
   5  -3  -3   29.46    1.24
   5  -3  -3   29.72    2.40
   5   3  -3   32.18    2.41
   5   3  -3   29.25    1.93
  -5   3   3   30.05    2.50
   4  -3  -3   88.06    3.54
  -4  -3   3   90.30    2.88
   4  -3  -3   88.69    2.34
   4   3  -3   93.14    3.45
  -4   3   3   93.70    3.38
   4   3  -3   93.90    3.11
   3  -3  -3   48.21    2.29
   3   3  -3   45.50    1.93
  -3   3   3   46.71    2.36
   3   3  -3   48.29    2.33
   3   3  -3   46.65    2.12
   2  -3  -3    0.88    0.76
   2   3  -3    0.17    0.68
   2   3  -3    0.19    0.74
   2   3  -3   -0.92    0.73
  -2   3   3    0.70    0.97
   1  -3  -3   57.28    2.24
   1  -3  -3   63.45    1.85
   1   3  -3   57.77    2.30
   1   3  -3   62.41    2.51
  -1   3   3   62.26    2.71
   0  -3  -3    1.54    0.89
   0   3   3    2.23    1.27
   0   3  -3    2.25    0.93
  -1  -3  -3   13.38    1.21
   1   3   3   12.12    1.84
   1   3   3   12.75    0.84
  -1   3  -3   10.09    1.29
   2  -3   3   80.65    3.18
  -2  -3  -3   78.29    2.66
   2   3   3   81.96    4.12
  -2   3  -3   75.05    2.81
   2   3   3   76.36    2.46
  -3  -3  -3   86.31    2.90
   3  -3   3   85.82    3.49
   3  -3   3   90.52    4.36
  -3   3  -3   85.69    3.27
   3   3   3   86.93    3.05
   3   3   3   88.89    4.62
   4  -3   3   25.63    2.96
  -4  -3  -3   28.81    2.08
   4  -3   3   24.02    2.14
  -4   3  -3   26.67    2.15
   4   3   3   32.29    3.24
   4   3   3   30.42    2.32
   5  -3   3   24.48    2.45
  -5  -3  -3   25.11    2.17
   5  -3   3   23.45    3.42
   5   3   3   22.69    2.12
   5   3   3   26.00    3.28
  -5   3  -3   23.15    2.16
   6  -3   3   -1.44    2.71
   6  -3   3   -1.83    1.48
  -6  -3  -3   -0.09    1.15
   6   3   3    1.26    2.55
  -6   3  -3   -0.03    1.34
   6   3   3    0.41    1.28
   7  -3   3   -3.83    2.63
   7  -3   3   -1.99    1.54
   7   3   3   -0.68    1.42
  -7   3  -3   -0.48    1.29
   7   3   3   -1.74    2.30
   8  -3   3   -0.14    1.73
   8  -3   3   -1.89    2.72
   8   3   3    0.93    1.59
   8   3   3   -0.86    2.56
  -8   3  -3    1.34    1.56
   9  -3   3   -1.26    1.90
   9   3   3    1.20    1.82
   9   3   3   -1.03    2.61
  10  -3   3    1.89    2.18
  10   3   3    2.59    2.08
  12  -4  -3    1.87    2.29
  11  -4  -3    2.58    2.24
  11   4  -3   -1.58    1.77
  10  -4  -3    4.55    2.15
  10   4  -3    3.58    1.99
   9  -4  -3    2.47    1.72
  -9   4   3    0.08    1.85
   9   4  -3   -1.08    1.61
   8  -4  -3    0.92    1.70
   8   4  -3   -0.79    1.16
  -8   4   3    3.84    2.04
   8   4  -3    3.29    1.73
  -7  -4   3   12.20    1.78
   7  -4  -3   11.53    2.27
   7   4  -3    8.52    1.55
   7   4  -3   10.19    2.07
  -7   4   3    9.55    2.22
  -6  -4   3   15.57    1.74
   6  -4  -3   15.89    2.20
   6   4  -3   14.96    2.03
  -6   4   3   19.30    2.38
   6   4  -3   17.42    1.68
   5  -4  -3    9.32    1.65
  -5  -4   3    9.14    1.32
  -5   4   3   11.00    1.81
   5   4  -3    8.45    1.44
   5   4  -3    9.54    1.27
  -4  -4   3   16.11    1.33
   4  -4  -3   16.57    1.60
  -4   4   3   19.74    1.91
   4   4  -3   17.67    1.61
   3  -4  -3   20.61    1.81
   3   4  -3   19.04    1.40
   3   4  -3   20.27    1.55
  -3   4   3   19.33    1.35
  -3   4   3   19.91    1.71
   3   4  -3   18.19    1.67
   2  -4  -3    1.90    0.83
  -2   4   3    3.00    1.05
   2   4  -3    1.86    0.77
   2   4  -3    0.79    0.74
  -2   4   3    2.70    1.01
   2   4  -3    0.80    0.82
   1  -4  -3   14.26    1.24
   1  -4  -3   13.53    1.28
   1   4  -3   12.05    1.15
   1   4  -3   10.15    1.23
  -1   4   3   11.96    1.26
  -1   4   3   11.43    1.45
   0  -4  -3    1.28    0.87
   0   4  -3    0.30    0.90
   0   4   3    1.35    1.44
  -1  -4  -3   20.91    1.49
   1   4   3   20.81    1.02
  -1   4  -3   19.42    1.58
   1   4   3   17.30    1.88
  -2  -4  -3   77.21    2.62
   2  -4   3   70.97    3.13
   2   4   3   75.46    2.47
  -2   4  -3   73.28    2.94
   2   4   3   81.33    3.85
   3  -4   3   20.72    1.83
   3  -4   3   21.36    2.43
  -3  -4  -3   21.24    1.66
   3   4   3   20.01    2.43
  -3   4  -3   20.96    1.78
   3   4   3   21.70    1.84
  -4  -4  -3    1.64    0.95
   4  -4   3   -0.38    2.18
   4  -4   3    0.52    1.54
  -4   4  -3    1.75    1.34
   4   4   3    1.37    1.07
   4   4   3    3.84    2.39
  -5  -4  -3   -0.19    1.08
   5  -4   3   -1.00    1.57
   5  -4   3    1.90    2.86
   5   4   3   -2.28    1.15
  -5   4  -3   -0.67    1.33
   5   4   3   -0.62    2.57
   6  -4   3   23.95    3.37
  -6  -4  -3   33.16    2.29
   6  -4   3   24.87    2.62
   6   4   3   24.75    3.35
  -6   4  -3   28.46    2.46
   6   4   3   23.33    2.38
   7  -4   3    1.30    1.73
   7  -4   3   -1.10    2.59
   7   4   3    1.79    1.58
   7   4   3   -1.96    2.30
  -7   4  -3   -0.55    1.50
   8  -4   3   -6.24    2.65
   8  -4   3   -0.39    1.74
   8   4   3   -0.59    1.44
  -8   4  -3    0.78    1.51
   8   4   3   -0.03    2.46
   9  -4   3   -3.99    1.64
   9   4   3   -5.04    2.56
   9   4   3   -0.75    1.61
  10  -4   3    0.07    2.18
  10   4   3    1.42    1.94
  12  -5  -3    8.68    2.80
  12   5  -3   10.77    2.90
  11  -5  -3    3.92    2.27
  11   5  -3    2.84    2.10
  10  -5  -3   32.24    3.56
  10   5  -3   32.49    3.49
   9  -5  -3   10.34    2.38
   9   5  -3   13.19    2.43
  -9   5   3   11.75    2.51
   8  -5  -3   49.41    4.04
   8   5  -3   46.24    3.73
  -8   5   3   39.22    3.33
   8   5  -3   45.11    2.90
   7  -5  -3   18.90    2.58
  -7  -5   3   17.74    1.84
   7   5  -3   15.97    1.89
  -7   5   3   18.76    2.52
   7   5  -3   17.25    2.27
   6  -5  -3    8.09    1.88
  -6  -5   3    9.41    1.51
   6   5  -3    8.63    1.45
   6   5  -3    5.99    1.66
  -6   5   3    9.78    2.23
   5  -5  -3   37.21    2.70
  -5  -5   3   36.85    2.07
  -5   5   3   33.57    2.86
   5   5  -3   39.79    2.86
   5   5  -3   38.09    2.27
   4  -5  -3    5.19    1.34
  -4  -5   3    5.91    1.03
   4   5  -3    5.74    1.12
   4   5  -3    5.64    1.17
  -4   5   3    7.73    1.61
   3  -5  -3   74.87    2.91
  -3   5   3   66.20    2.74
  -3   5   3   67.83    2.11
   3   5  -3   66.84    2.31
   3   5  -3   70.65    2.77
   3   5  -3   68.70    2.83
   2  -5  -3    3.12    0.91
  -2   5   3    2.05    0.99
  -2   5   3    1.24    1.02
   2   5  -3    1.44    0.76
   2   5  -3    2.00    0.84
   2   5  -3    2.22    0.81
   1  -5  -3   45.63    1.91
   1   5  -3   47.37    2.07
  -1   5   3   49.18    2.16
   1   5  -3   48.93    2.36
  -1   5   3   48.36    2.55
   0  -5  -3  135.68    3.72
   0   5  -3  134.83    3.80
   0   5  -3  140.09    4.20
   0   5   3  141.35    4.61
  -1  -5  -3   39.91    1.88
   1   5   3   39.65    3.13
  -1   5  -3   39.87    2.04
   1   5   3   39.95    1.46
  -2  -5  -3   40.26    1.94
   2   5   3   43.08    3.53
   2   5   3   43.80    1.80
  -2   5  -3   39.80    2.39
  -3  -5  -3   65.64    2.39
   3  -5   3   63.02    3.22
   3   5   3   63.25    2.67
   3   5   3   60.53    4.31
  -3   5  -3   63.21    2.98
   4  -5   3   10.70    2.58
  -4  -5  -3   10.53    1.27
   4  -5   3    9.24    1.88
  -4   5  -3   11.36    1.74
   4   5   3   11.73    2.48
   4   5   3   10.72    1.44
  -5  -5  -3  111.67    3.61
   5  -5   3  121.94    5.07
   5  -5   3  119.83    6.05
  -5   5  -3  111.39    4.35
   5   5   3  126.62    6.19
   5   5   3  122.39    4.61
   6  -5   3   44.84    3.82
   6  -5   3   32.10    3.59
  -6   5  -3   41.71    2.94
   6   5   3   36.34    3.70
   6   5   3   38.36    2.95
   7  -5   3    1.63    1.87
   7  -5   3   -1.08    2.75
  -7   5  -3    0.54    1.58
   7   5   3   -3.69    2.40
   7   5   3    1.31    1.42
   8  -5   3    3.34    2.15
   8  -5   3    3.20    2.98
  -8   5  -3    9.74    2.01
   8   5   3    8.42    2.79
   8   5   3   12.11    2.14
   9  -5   3    4.75    2.32
   9   5   3    2.09    2.89
   9   5   3    7.91    2.24
  10  -5   3   -1.92    1.94
  10   5   3    1.91    1.87
  12  -6  -3    4.59    2.45
  12   6  -3    2.61    2.30
  11  -6  -3    1.14    2.12
  11   6  -3    2.22    2.08
  10  -6  -3   11.57    2.67
  10   6  -3   13.13    2.51
 -10   6   3   10.74    2.46
   9  -6  -3    0.50    1.95
   9   6  -3    4.18    1.82
  -9   6   3    2.37    2.22
   8  -6  -3    2.17    1.91
  -8   6   3    3.24    2.12
   8   6  -3    3.46    1.47
   8   6  -3    0.80    1.48
   7  -6  -3   21.45    2.73
  -7  -6   3   27.90    1.96
   7   6  -3   22.74    2.53
  -7   6   3   28.38    2.90
   7   6  -3   28.16    2.46
   6  -6  -3   50.45    3.41
  -6  -6   3   43.27    2.44
  -6   6   3   39.90    3.42
   6   6  -3   40.59    2.66
   6   6  -3   44.18    3.19
  -5  -6   3    0.21    1.02
   5  -6  -3    0.86    1.27
   5   6  -3   -0.95    0.97
  -5   6   3    2.02    1.69
   5   6  -3    1.18    1.22
   4  -6  -3  101.57    3.96
  -4  -6   3  103.55    2.95
   4   6  -3  101.07    3.62
  -4   6   3   96.04    3.59
   4   6  -3  100.87    3.86
   3  -6  -3  165.65    4.80
  -3   6   3  171.10    4.80
   3   6  -3  168.83    4.88
   3   6  -3  166.45    4.87
   3   6  -3  167.95    4.11
  -3   6   3  162.48    3.89
   2  -6  -3  146.34    4.06
   2   6  -3  149.30    4.42
   2   6  -3  149.22    3.79
  -2   6   3  144.11    4.11
  -2   6   3  146.60    4.03
   2   6  -3  150.17    4.28
  -1   6   3  229.26    5.38
   1   6  -3  223.66    6.04
   1   6  -3  220.31    5.33
  -1   6   3  221.30    5.97
   0  -6  -3   76.45    2.61
   0   6   3   76.99    2.53
   0   6  -3   71.02    2.61
   0   6  -3   77.47    3.06
   0   6   3   76.16    3.49
  -1  -6  -3   32.81    1.73
  -1   6  -3   32.49    1.96
   1   6   3   36.95    2.77
  -2  -6  -3   18.04    1.49
  -2   6  -3   12.43    1.49
   2   6   3   14.53    1.29
   2   6   3   13.81    2.19
   3  -6   3    3.71    1.56
  -3  -6  -3    1.07    0.88
  -3   6  -3    3.85    1.26
   3   6   3    1.78    1.97
   3   6   3    2.73    0.88
   4  -6   3    0.16    2.18
   4  -6   3    0.41    1.64
  -4  -6  -3    0.86    0.93
   4   6   3    1.49    1.03
  -4   6  -3    2.41    1.50
   4   6   3    5.53    2.44
   5  -6   3    0.10    1.89
   5  -6   3    1.97    2.63
  -5  -6  -3   -0.11    0.99
   5   6   3    1.59    1.33
  -5   6  -3    3.38    1.64
   5   6   3    4.55    2.64
   6  -6   3    0.89    2.76
   6  -6   3    0.45    1.72
   6   6   3    1.35    1.38
  -6   6  -3    2.42    1.60
   6   6   3   -0.81    2.29
   7  -6   3    2.58    2.88
   7  -6   3    1.63    1.85
  -7   6  -3    2.39    1.75
   7   6   3    5.41    2.56
   7   6   3    5.34    1.67
   8  -6   3    5.23    3.03
   8  -6   3    6.04    2.34
   8   6   3    4.74    2.67
  -8   6  -3    4.40    1.84
   8   6   3    8.16    1.99
   9  -6   3    7.32    2.55
   9   6   3    1.02    2.62
   9   6   3    5.79    2.00
  10  -6   3    2.74    2.27
  10   6   3    1.38    2.71
  10   6   3    1.65    1.85
  12  -7  -3    1.78    2.32
  12   7  -3   -0.73    2.11
  11  -7  -3    0.82    2.09
  11   7  -3    0.69    1.96
  10  -7  -3    3.25    2.14
  10   7  -3    1.08    1.90
 -10   7   3    0.15    2.13
   9  -7  -3   -1.09    1.91
  -9   7   3   -1.06    1.99
   9   7  -3    1.08    1.68
   8  -7  -3   -0.92    1.76
   8   7  -3    0.55    1.37
  -8   7   3    1.17    1.99
   8   7  -3    0.26    1.61
   7  -7  -3   -0.93    1.59
   7   7  -3   -0.54    1.48
   7   7  -3   -0.13    1.28
  -7   7   3    3.05    2.18
   6  -7  -3   22.52    2.52
  -6  -7   3   25.37    2.10
  -6   7   3   25.44    2.74
   6   7  -3   24.08    2.23
   6   7  -3   25.88    2.52
  -5  -7   3   52.86    2.22
   5  -7  -3   61.11    3.62
   5   7  -3   55.37    2.80
   5   7  -3   54.28    3.06
  -5   7   3   56.65    3.47
   4  -7  -3    5.45    1.45
   4   7  -3    5.14    0.91
   4   7  -3    5.09    1.13
   4   7  -3    4.21    1.26
  -4   7   3    7.08    1.71
   3  -7  -3    2.06    1.17
  -3   7   3   -0.03    0.50
   3   7  -3   -0.41    0.70
   3   7  -3   -0.37    0.86
   3   7  -3   -0.10    0.89
  -3   7   3   -0.39    1.16
   2  -7  -3   34.57    2.27
   2   7  -3   31.70    1.98
  -2   7   3   26.93    2.05
   2   7  -3   30.43    1.92
  -2   7   3   34.05    1.97
   2   7  -3   32.09    1.66
   1   7  -3   35.08    1.90
  -1   7   3   36.17    2.18
  -1   7   3   43.05    2.59
   1   7  -3   39.18    2.24
   0   7  -3    4.82    1.18
   0   7  -3    6.12    1.07
   0   7   3    6.78    1.17
   0   7   3    9.25    1.59
  -1  -7  -3  165.95    4.17
   1   7   3  157.55    5.43
  -1   7  -3  158.98    4.56
  -2  -7  -3   19.50    1.53
   2   7   3   18.31    1.40
  -2   7  -3   20.34    1.87
   2   7   3   22.26    2.40
   3  -7   3   10.70    1.95
  -3  -7  -3   12.83    1.22
  -3   7  -3    9.62    1.61
   3   7   3   10.90    1.23
   3   7   3   12.19    2.20
   4  -7   3    2.05    1.90
   4  -7   3    2.68    2.42
  -4  -7  -3    0.14    0.86
   4   7   3    0.13    1.00
   4   7   3    2.36    2.24
  -4   7  -3   -0.70    1.50
   5  -7   3   25.14    3.24
   5  -7   3   24.52    2.78
  -5  -7  -3   26.73    1.91
   5   7   3   29.59    2.50
   5   7   3   28.62    3.44
  -5   7  -3   27.57    2.61
   6  -7   3    3.81    1.96
   6  -7   3    5.54    2.85
  -6   7  -3    3.72    1.64
   6   7   3    1.86    2.30
   6   7   3    2.91    1.32
   7  -7   3    2.35    1.98
   7  -7   3   -1.24    2.70
  -7   7  -3    2.80    1.79
   7   7   3    3.20    1.51
   7   7   3    2.34    2.51
   8  -7   3   -0.46    1.92
   8   7   3    3.58    1.66
   8   7   3    1.43    2.49
  -8   7  -3   -0.72    1.72
   9  -7   3   -0.82    1.95
   9   7   3    0.31    1.69
   9   7   3   -4.60    2.50
  10  -7   3    1.38    2.41
  10   7   3    1.28    1.96
  10   7   3   -2.07    2.64
  12  -8  -3    8.07    2.80
  12   8  -3   13.05    3.08
  11  -8  -3    3.76    2.30
  11   8  -3    6.55    2.48
  10  -8  -3    2.55    2.09
 -10   8   3    3.82    2.31
  10   8  -3    3.00    2.05
   9  -8  -3   17.43    2.77
   9   8  -3   21.27    2.39
   9   8  -3   17.66    2.63
  -9   8   3   16.43    2.71
   8  -8  -3    2.84    1.95
   8   8  -3    1.61    1.47
   8   8  -3    0.51    1.33
  -8   8   3    2.70    2.10
   7  -8  -3    3.78    1.87
   7   8  -3    3.11    1.41
   7   8  -3    2.00    1.65
  -7   8   3    1.79    2.19
  -6  -8   3   16.68    1.46
   6  -8  -3   16.87    2.45
   6   8  -3   14.30    1.84
  -6   8   3   17.19    2.59
   6   8  -3   12.99    2.09
   5  -8  -3    0.43    1.40
  -5  -8   3    0.82    0.95
   5   8  -3   -1.67    1.02
   5   8  -3   -1.04    1.04
  -5   8   3   -0.49    1.81
   4  -8  -3  397.99   10.02
   4   8  -3  413.79   10.16
   4   8  -3  394.34    8.37
  -4   8   3  391.80    9.44
   4   8  -3  407.49   10.18
   3  -8  -3  206.18    5.83
   3   8  -3  205.69    4.84
  -3   8   3  201.49    4.74
  -3   8   3  206.52    5.57
   3   8  -3  206.49    5.83
   3   8  -3  213.86    6.00
  -2   8   3   71.33    2.60
  -2   8   3   71.59    2.89
   2   8  -3   72.24    2.53
   2   8  -3   72.06    2.91
   2   8  -3   79.71    3.14
  -1   8   3   67.72    2.96
   1   8  -3   69.30    2.95
  -1   8   3   62.41    2.68
   1   8  -3   63.02    2.48
   0   8  -3    8.19    1.23
   0   8  -3    9.20    1.28
   0   8   3   10.41    1.27
   0   8   3    8.99    1.55
   1   8   3   56.99    2.35
   1   8   3   61.70    3.57
  -1   8  -3   52.73    2.66
  -2  -8  -3    0.29    0.82
   2   8   3    0.17    0.71
  -2   8  -3    0.60    1.08
   2   8   3    2.20    1.74
  -3  -8  -3   18.14    1.53
   3   8   3   14.90    1.42
  -3   8  -3   17.75    1.89
   3   8   3   14.91    2.40
   4  -8   3   22.16    2.55
  -4  -8  -3   25.49    1.78
   4   8   3   23.01    2.84
  -4   8  -3   22.95    2.38
   4   8   3   26.81    2.15
   5  -8   3    3.08    2.13
  -5  -8  -3    0.50    0.91
   5  -8   3   -1.01    2.66
   5   8   3    1.06    2.45
   5   8   3    0.35    1.23
  -5   8  -3    0.36    1.66
   6  -8   3   15.96    2.64
   6  -8   3   19.58    3.29
   6   8   3   17.20    2.98
   6   8   3   20.94    2.17
  -6   8  -3   23.59    2.52
   7  -8   3    7.65    3.13
   7  -8   3    9.20    2.43
  -7   8  -3   10.20    2.15
   7   8   3   14.11    2.04
   7   8   3   11.40    2.86
   8  -8   3   -3.43    1.77
   8   8   3    3.82    2.53
   8   8   3    1.39    1.54
  -8   8  -3   -0.11    1.78
   9  -8   3    4.45    2.55
  -9   8  -3    5.29    2.11
   9   8   3    9.76    2.24
   9   8   3    7.03    2.86
  10  -8   3    1.20    2.44
  10   8   3   -0.89    2.77
  12  -9  -3    0.31    2.30
  12   9  -3    8.88    2.69
  11  -9  -3    6.21    2.67
  11   9  -3   10.30    2.70
  10  -9  -3   36.73    3.89
 -10   9   3   35.07    3.48
  10   9  -3   36.58    3.84
   9  -9  -3   -1.39    1.71
   9   9  -3    1.06    1.51
   9   9  -3    1.78    1.84
  -9   9   3   -0.74    2.26
   8  -9  -3    5.53    2.17
   8   9  -3    8.29    1.81
   8   9  -3   11.20    2.22
  -8   9   3   15.61    2.62
   7  -9  -3    2.65    1.87
   7   9  -3    3.40    1.69
   7   9  -3    3.85    1.57
  -7   9   3    3.97    2.28
   6  -9  -3    1.10    1.74
  -6  -9   3    4.48    1.16
  -6   9   3    3.67    2.22
   6   9  -3    3.05    1.49
   6   9  -3    2.38    1.53
  -5  -9   3    0.82    0.93
   5  -9  -3    2.22    1.72
   5   9  -3   -0.24    1.12
   5   9  -3   -1.19    1.08
  -5   9   3   -1.79    1.68
   4  -9  -3   87.46    3.95
   4   9  -3   79.84    3.54
   4   9  -3   83.60    2.52
   4   9  -3   80.49    3.47
  -4   9   3   83.42    3.60
   3  -9  -3   67.66    3.40
  -3   9   3   71.52    3.42
   3   9  -3   72.54    3.17
  -3   9   3   71.10    2.11
   3   9  -3   68.67    3.13
   3   9  -3   65.48    2.38
  -2   9   3    4.07    1.31
  -2   9   3    2.94    0.93
   2   9  -3    4.56    0.95
   2   9  -3    2.59    1.07
   1   9  -3  130.68    3.75
  -1   9   3  132.23    3.95
  -1   9   3  130.50    4.19
   1   9  -3  129.01    4.32
   0   9  -3   93.82    3.56
   0   9   3   98.03    3.85
   0   9   3  103.59    3.18
   0   9  -3   96.93    3.22
  -1   9  -3    0.38    0.97
   1   9   3    2.54    1.53
   1   9   3   -0.20    0.97
  -1   9  -3    0.30    1.00
  -2  -9  -3   50.67    2.17
   2   9   3   57.68    3.75
   2   9   3   54.78    2.28
  -2   9  -3   57.07    2.96
   2   9   3   52.16    2.30
  -3  -9  -3   22.71    1.64
   3   9   3   20.97    2.54
   3   9   3   23.40    1.83
  -3   9  -3   24.22    2.25
   4  -9   3    2.86    2.07
  -4  -9  -3   -0.05    0.89
  -4   9  -3    1.64    1.50
   4   9   3    1.06    2.25
   4   9   3   -0.21    1.06
   5  -9   3   15.29    2.59
   5  -9   3   11.93    2.84
   5   9   3   10.85    1.73
  -5   9  -3   13.17    2.24
   5   9   3   12.15    2.83
   6  -9   3    0.93    2.01
   6  -9   3    0.07    2.57
   6   9   3   -0.15    1.25
  -6   9  -3    1.37    1.70
   6   9   3    0.67    2.29
   7  -9   3    6.03    2.30
   7  -9   3    8.70    3.06
   7   9   3    9.57    1.91
   7   9   3    7.37    2.65
  -7   9  -3    7.65    2.07
   8  -9   3   16.89    2.84
   8   9   3   18.98    2.50
   8   9   3   17.71    3.20
  -8   9  -3   19.85    2.74
   9  -9   3    7.78    2.77
   9   9   3    7.16    3.05
  -9   9  -3    7.24    2.29
   9   9   3    8.97    2.16
  10  -9   3   -4.00    2.17
  10   9   3   -4.66    2.52
  12 -10  -3   -0.51    2.23
  12  10  -3   -1.29    2.05
  11 -10  -3    2.94    2.47
  11  10  -3    3.74    2.33
  10 -10  -3    3.44    2.39
 -10  10   3    0.07    2.29
  10  10  -3    0.14    1.84
   9 -10  -3   -2.10    1.93
   9  10  -3    2.10    1.88
  -9  10   3    1.03    2.27
   9  10  -3    1.03    1.53
   8 -10  -3    0.30    1.77
  -8  10   3    1.86    2.18
   8  10  -3    1.10    1.53
   8  10  -3   -0.90    1.33
   7 -10  -3   24.06    2.94
   7  10  -3   24.59    2.69
   7  10  -3   29.81    2.66
  -7  10   3   28.59    3.05
   6 -10  -3    5.80    2.00
  -6  10   3    5.82    2.37
   6  10  -3    6.17    1.73
   6  10  -3    7.37    1.66
  -5 -10   3    1.37    0.92
   5 -10  -3    3.41    1.85
   5  10  -3    1.20    1.27
   5  10  -3    1.98    1.31
  -5  10   3    1.35    2.13
   4 -10  -3   14.14    2.00
   4  10  -3   15.40    1.77
  -4  10   3   16.25    2.20
   4  10  -3   13.90    1.74
   4  10  -3   18.19    1.47
   3 -10  -3   57.05    3.36
   3  10  -3   60.63    3.01
   3  10  -3   58.92    2.97
  -3  10   3   58.22    3.01
   3  10  -3   54.85    2.18
  -3  10   3   56.83    1.95
  -2  10   3   34.29    2.00
   2  10  -3   39.31    2.45
   2  10  -3   35.49    1.83
  -2  10   3   40.91    2.45
  -1  10   3   35.89    2.42
   1  10  -3   37.47    2.02
  -1  10   3   37.04    2.32
   1  10  -3   36.09    2.31
   0  10   3   83.81    2.95
   0  10  -3   73.63    3.01
   0  10   3   85.67    3.65
   0  10  -3   76.59    3.26
  -1  10  -3    6.25    1.31
   1  10   3    8.29    1.77
   1  10   3   10.55    1.24
  -1  10  -3    6.32    1.39
   2  10   3    0.20    1.03
   2  10   3    1.58    1.74
  -2  10  -3    1.88    1.24
  -3 -10  -3    4.67    1.01
  -3  10  -3    4.48    1.63
   3  10   3    4.01    1.13
   3  10   3    5.93    2.13
   3  10   3    4.52    1.16
  -4 -10  -3   47.87    2.07
   4 -10   3   47.92    4.28
   4  10   3   52.19    2.86
   4  10   3   52.83    4.58
  -4  10  -3   50.91    3.15
   5 -10   3   28.38    3.15
   5 -10   3   32.87    3.55
   5  10   3   35.84    2.71
   5  10   3   27.92    3.40
  -5  10  -3   31.06    2.88
   6 -10   3   -2.17    2.01
   6 -10   3    1.15    2.54
  -6  10  -3   -2.39    1.52
   6  10   3   -1.59    2.18
   6  10   3   -0.62    1.23
   7 -10   3   -0.93    2.87
   7 -10   3    1.17    2.18
  -7  10  -3    4.57    1.95
   7  10   3    0.24    2.37
   7  10   3    2.81    1.52
   8 -10   3    4.11    2.27
   8  10   3    0.62    1.49
  -8  10  -3    2.07    2.06
   8  10   3    2.30    2.40
   9 -10   3   -1.82    2.29
  -9  10  -3   -1.11    1.97
   9  10   3   -0.40    2.53
   9  10   3    2.40    1.81
  10 -10   3   -1.64    2.23
  10  10   3   -4.05    2.35
  12 -11  -3   -0.50    2.31
  12  11  -3    0.65    2.21
  11 -11  -3   -2.76    2.15
  11  11  -3    3.97    2.31
 -11  11   3   -2.66    2.33
  10 -11  -3   10.45    2.79
 -10  11   3    5.78    2.46
  10  11  -3   11.56    2.49
   9 -11  -3    0.91    1.92
   9  11  -3   -0.18    1.70
   9  11  -3   -0.68    1.53
  -9  11   3   -2.81    2.08
   8 -11  -3   15.74    2.82
  -8  11   3   18.60    2.84
   8  11  -3   15.66    2.55
   8  11  -3   14.33    2.14
   7 -11  -3    2.93    2.09
   7  11  -3    2.25    1.51
  -7  11   3    0.93    2.21
   7  11  -3    1.86    1.52
   6 -11  -3   25.36    2.79
   6  11  -3   21.86    2.33
  -6  11   3   28.45    3.05
   6  11  -3   26.88    2.72
   5 -11  -3   81.94    4.57
  -5 -11   3   74.76    2.44
   5  11  -3   74.25    3.70
  -5  11   3   76.79    4.01
   5  11  -3   73.51    3.94
   4 -11  -3    9.61    1.96
  -4  11   3    8.01    2.08
   4  11  -3    8.60    1.00
   4  11  -3    7.32    1.41
   4  11  -3    6.13    1.45
   3  11  -3  151.66    4.98
  -3  11   3  141.23    4.68
   3  11  -3  147.91    4.97
  -3  11   3  143.88    3.78
   3  11  -3  145.60    3.84
   2  11  -3    7.81    1.41
  -2  11   3    3.50    1.45
  -2  11   3    6.55    1.05
   2  11  -3    5.95    1.06
   1  11  -3   18.31    1.81
  -1  11   3   18.22    1.69
   1  11  -3   22.16    1.80
  -1  11   3   16.63    1.71
   0  11   3    0.55    1.17
   0  11   3    2.78    1.36
   0  11  -3    0.67    1.08
   0  11  -3    1.23    1.00
  -1  11  -3    1.79    1.30
   1  11   3    3.59    1.65
  -1  11  -3    3.28    1.15
   1  11   3    2.90    1.18
   2  11   3   78.46    2.80
  -2  11  -3   76.83    3.34
   2  11   3   83.08    4.30
   3  11   3   59.28    4.44
   3  11   3   57.17    2.76
   3  11   3   60.65    2.47
  -3  11  -3   54.04    3.36
   4 -11   3    3.03    2.31
   4  11   3    0.36    1.12
  -4  11  -3   -0.47    1.69
   4  11   3    0.83    1.11
   4  11   3    1.35    2.26
   5 -11   3    3.00    2.31
   5 -11   3    5.09    2.74
  -5  11  -3    6.92    2.06
   5  11   3    7.83    2.59
   5  11   3    6.36    1.58
   6 -11   3   11.83    2.84
   6 -11   3    7.58    2.30
  -6  11  -3    8.12    2.04
   6  11   3    4.97    2.52
   6  11   3    9.09    1.73
   7 -11   3   14.79    3.32
   7 -11   3   16.15    2.87
   7  11   3   16.85    2.28
  -7  11  -3   17.34    2.67
   7  11   3   13.75    2.96
   8 -11   3   -0.41    2.12
   8  11   3    2.23    1.58
  -8  11  -3    2.06    1.97
   8  11   3   -1.56    2.23
   9 -11   3   -0.59    2.40
  -9  11  -3    0.66    2.18
   9  11   3    2.05    1.80
   9  11   3    0.44    2.70
  10 -11   3    0.65    2.51
  10  11   3    1.03    2.64
  11 -12  -3    3.68    2.33
  11  12  -3    4.15    2.37
 -11  12   3    3.62    2.65
  10 -12  -3   12.74    2.92
  10  12  -3   18.72    3.04
 -10  12   3   11.05    2.73
   9 -12  -3   11.28    2.70
   9  12  -3   15.14    2.67
   9  12  -3   12.50    2.26
  -9  12   3    9.76    2.64
   8 -12  -3   13.72    2.76
   8  12  -3   10.97    2.19
   8  12  -3    7.49    1.94
  -8  12   3   15.50    2.82
   7 -12  -3   23.48    3.01
  -7  12   3   16.59    2.83
   7  12  -3   17.56    2.50
   7  12  -3   17.66    2.30
   6 -12  -3   26.42    3.00
   6  12  -3   23.33    2.46
   6  12  -3   25.39    2.75
  -6  12   3   21.54    2.95
  -5 -12   3    1.52    0.88
   5 -12  -3    1.11    2.01
   5  12  -3   -0.56    1.31
   5  12  -3   -0.33    1.29
  -5  12   3   -0.28    2.20
   4 -12  -3   19.38    2.44
   4  12  -3   20.12    2.10
  -4  12   3   19.01    2.36
   4  12  -3   19.31    1.49
   4  12  -3   19.50    2.13
   3  12  -3   30.87    1.71
   3  12  -3   28.05    2.42
  -3  12   3   25.84    2.37
  -3  12   3   29.92    1.60
  -2  12   3    4.31    1.58
  -2  12   3    2.80    0.97
   2  12  -3    2.85    1.19
   2  12  -3    2.87    1.00
  -1  12   3  105.38    3.78
  -1  12   3   95.41    3.67
   1  12  -3  100.28    3.92
   1  12  -3   99.49    3.44
   0  12  -3    0.53    1.12
   0  12   3    1.29    1.23
   0  12  -3    2.04    1.17
   0  12   3    0.49    1.29
   1  12   3  136.44    5.26
  -1  12  -3  146.48    4.66
   1  12   3  144.50    4.13
  -1  12  -3  145.26    4.95
   2  12   3   17.72    1.58
   2  12   3   17.60    2.38
  -2  12  -3   18.92    2.02
   3  12   3    0.54    1.08
   3  12   3    0.74    1.84
   3  12   3    0.86    1.12
  -3  12  -3    0.70    1.50
   4 -12   3    9.73    2.60
  -4  12  -3    7.30    1.90
   4  12   3    7.28    1.50
   4  12   3    6.83    2.29
   4  12   3    8.29    1.27
   5 -12   3    2.78    2.27
   5  12   3    3.21    1.37
  -5  12  -3    2.70    1.90
   5  12   3    4.90    2.24
   6 -12   3   21.52    3.15
   6 -12   3   22.20    2.98
  -6  12  -3   21.83    2.60
   6  12   3   24.23    3.25
   6  12   3   21.80    2.35
   7 -12   3   -0.19    2.18
   7 -12   3   -0.94    2.76
   7  12   3   -1.26    2.22
  -7  12  -3    2.61    1.97
   7  12   3    2.09    1.58
   8 -12   3    3.70    2.42
   8  12   3    5.92    2.71
   8  12   3   11.85    2.23
  -8  12  -3    7.49    2.31
   9 -12   3    6.88    2.89
   9  12   3    3.82    2.72
   9  12   3    7.88    2.21
  -9  12  -3    7.91    2.47
  10 -12   3   -1.61    2.53
  10  12   3   -8.46    2.20
  11 -13  -3   -1.38    2.26
 -11  13   3   -2.13    2.46
  11  13  -3    2.09    2.17
  10 -13  -3    1.08    2.37
  10  13  -3    1.18    2.05
 -10  13   3   -2.36    2.36
   9 -13  -3   16.20    3.09
   9  13  -3   14.85    2.39
   9  13  -3   14.86    2.70
  -9  13   3   18.10    3.01
   8 -13  -3   14.49    2.84
   8  13  -3   12.71    2.42
   8  13  -3   13.67    2.31
  -8  13   3   13.53    2.76
   7 -13  -3    2.17    2.15
   7  13  -3    1.61    1.47
  -7  13   3   -1.17    2.15
   7  13  -3    1.98    1.68
   6 -13  -3   -0.68    1.94
  -6  13   3    2.42    2.20
   6  13  -3    0.12    1.43
   6  13  -3   -0.63    1.50
  -5 -13   3    4.80    0.95
   5 -13  -3    7.35    2.27
   5  13  -3    2.51    1.43
  -5  13   3    7.08    2.29
   5  13  -3    3.71    1.61
   4 -13  -3   13.17    2.38
  -4  13   3   11.88    0.93
  -4  13   3   13.67    2.32
   4  13  -3   12.36    1.17
   4  13  -3    9.68    1.79
   4  13  -3    9.16    1.73
  -3  13   3    4.23    1.74
  -3  13   3    2.35    0.78
   3  13  -3    2.90    1.23
   3  13  -3    1.77    0.87
   2  13  -3   23.31    1.89
   2  13  -3   21.75    2.09
  -2  13   3   23.29    2.00
  -2  13   3   24.47    2.21
  -1  13   3   55.65    3.00
   1  13  -3   52.54    3.02
   1  13  -3   53.12    2.55
  -1  13   3   55.59    2.81
   0  13   3    4.73    1.41
   0  13   3    5.77    1.51
   0  13  -3    4.21    1.32
   0  13  -3    4.15    1.31
  -1  13  -3    9.07    1.60
   1  13   3   10.03    1.89
   1  13   3   13.25    1.63
  -1  13  -3   11.08    1.72
   2  13   3   36.56    3.26
  -2  13  -3   37.51    3.03
   2  13   3   39.53    2.38
  -2  13  -3   40.22    2.95
   3  13   3   -0.71    1.16
   3  13   3    3.84    2.13
  -3  13  -3    1.28    1.54
   4  13   3    6.33    2.45
   4  13   3    6.24    1.49
  -4  13  -3    5.86    1.90
   5 -13   3    1.38    2.46
   5  13   3    2.04    1.26
  -5  13  -3   -1.17    1.74
   5  13   3   -2.76    2.04
   6 -13   3   20.85    3.14
   6 -13   3   24.73    3.28
  -6  13  -3   23.87    2.70
   6  13   3   23.80    3.20
   6  13   3   19.26    2.23
   7 -13   3   -0.85    2.21
   7  13   3   -2.06    2.18
   7  13   3    0.83    1.41
  -7  13  -3   -0.48    1.86
   8 -13   3    3.56    2.57
   8  13   3    7.10    2.80
  -8  13  -3    6.49    2.46
   8  13   3    9.43    2.14
   9 -13   3    2.98    2.61
   9  13   3   -2.74    2.49
   9  13   3    2.41    1.89
  -9  13  -3   -0.51    2.27
  10 -13   3   -3.49    2.29
  10  13   3   -4.90    2.51
  11 -14  -3   14.79    3.30
  11  14  -3   10.75    2.85
 -11  14   3   13.83    3.32
  10 -14  -3   -1.44    2.33
  10  14  -3    0.57    2.08
 -10  14   3    1.44    2.47
  10  14  -3    2.50    1.85
   9 -14  -3   -1.18    2.00
   9  14  -3    1.92    1.87
   9  14  -3    1.11    1.61
  -9  14   3   -2.96    2.21
   8 -14  -3   -0.46    1.96
   8  14  -3   -0.08    1.51
  -8  14   3   -2.29    2.25
   8  14  -3   -1.71    1.59
   7 -14  -3    4.31    2.31
   7  14  -3    4.75    1.73
  -7  14   3    0.71    2.26
   7  14  -3    3.00    1.57
   6 -14  -3    5.52    2.39
   6  14  -3    0.74    1.54
   6  14  -3    2.60    1.58
  -6  14   3    6.70    2.42
   5 -14  -3    2.09    2.19
  -5  14   3    1.92    2.33
   5  14  -3    0.45    1.36
   5  14  -3    1.53    1.55
   4 -14  -3   18.50    2.62
   4  14  -3   16.52    1.31
  -4  14   3   18.11    2.58
   4  14  -3   16.42    2.11
  -4  14   3   18.22    1.21
   4  14  -3   13.34    1.92
   3  14  -3   -0.63    0.81
   3  14  -3    0.94    1.20
  -3  14   3   -0.02    1.86
  -3  14   3    0.69    0.80
  -2  14   3  119.07    4.58
   2  14  -3  127.38    4.80
  -2  14   3  123.44    4.04
   2  14  -3  129.27    3.80
  -1  14   3   15.08    1.65
  -1  14   3   12.88    1.92
   1  14  -3   14.28    1.57
   1  14  -3   14.78    1.80
   0  14   3   -0.14    1.35
   0  14   3    1.21    1.38
   0  14  -3    1.87    1.29
   0  14  -3    0.67    1.27
   1  14   3   16.94    2.17
   1  14   3   17.15    1.80
  -1  14  -3   13.66    1.77
  -1  14  -3   18.44    2.05
   2  14   3   20.36    2.43
  -2  14  -3   27.49    2.58
   2  14   3   22.34    1.86
  -2  14  -3   26.37    2.51
  -3  14  -3   13.64    2.10
   3  14   3    9.41    1.46
   3  14   3   10.98    2.41
   4  14   3   15.93    1.96
   4  14   3   17.68    2.86
  -4  14  -3   16.45    2.38
   5 -14   3   -3.30    2.16
   5  14   3    1.86    1.38
  -5  14  -3    3.24    1.94
   5  14   3    2.81    2.25
   6 -14   3   10.12    2.68
   6 -14   3   16.91    2.95
  -6  14  -3   15.05    2.45
   6  14   3   14.86    2.03
   6  14   3   14.64    2.89
   7 -14   3   18.49    3.10
   7  14   3   19.84    2.45
   7  14   3   22.01    3.37
  -7  14  -3   16.52    2.70
   8 -14   3   -2.01    2.24
  -8  14  -3    2.62    2.17
   8  14   3    1.40    2.33
   8  14   3    1.93    1.69
   9 -14   3   -3.47    2.41
  -9  14  -3    0.81    2.35
   9  14   3   -2.74    2.32
  10 -14   3   -1.81    2.62
 -10  14  -3   -3.85    2.18
  10  14   3   -3.54    2.44
  11 -15  -3    7.45    2.96
 -11  15   3    9.36    3.05
  11  15  -3    8.88    2.80
  10 -15  -3   12.12    3.08
 -10  15   3   16.05    3.12
  10  15  -3   12.95    2.59
  10  15  -3   12.13    2.87
   9 -15  -3   -5.80    2.12
   9  15  -3    0.62    1.63
   9  15  -3    0.87    1.80
  -9  15   3   -4.81    2.20
   8 -15  -3    4.90    2.58
  -8  15   3    5.70    2.65
   8  15  -3    4.82    2.05
   8  15  -3    4.82    1.84
   7 -15  -3    2.21    2.29
   7  15  -3    2.38    1.76
   7  15  -3    1.90    1.61
  -7  15   3    1.09    2.34
   6 -15  -3    2.59    2.30
   6  15  -3    2.98    1.63
  -6  15   3    3.16    2.25
   6  15  -3    0.37    1.47
   5 -15  -3   54.72    4.72
   5  15  -3   39.42    3.25
   5  15  -3   44.60    3.53
  -5  15   3   42.07    3.58
   4 -15  -3    4.68    2.32
   4  15  -3    4.06    0.97
   4  15  -3    4.84    1.65
  -4  15   3    2.86    2.15
  -4  15   3    3.27    0.76
  -3  15   3    0.25    0.83
   3  15  -3    0.36    0.97
   3  15  -3    0.78    1.39
  -3  15   3    1.00    2.06
   2  15  -3   11.96    1.44
   2  15  -3   14.61    1.94
  -2  15   3   12.43    1.50
  -2  15   3   12.04    2.03
  -1  15   3    2.90    1.75
   1  15  -3    2.45    1.20
  -1  15   3    3.00    1.30
   1  15  -3    1.17    1.18
   0  15  -3  160.95    5.68
   0  15   3  162.92    5.52
   0  15  -3  163.96    5.07
   0  15   3  172.94    4.94
   1  15   3    3.60    1.55
   1  15   3    4.16    1.74
  -1  15  -3    5.22    1.54
  -1  15  -3    4.07    1.50
  -2  15  -3    4.67    1.84
   2  15   3    5.21    2.02
   2  15   3    5.76    1.53
  -2  15  -3    4.82    1.64
  -3  15  -3   10.73    2.05
   3  15   3   10.76    2.39
   3  15   3   10.60    1.52
  -4  15  -3   -0.37    1.61
   4  15   3   -0.07    2.01
   5 -15   3   42.95    3.88
   5  15   3   47.29    3.09
  -5  15  -3   42.13    3.54
   5  15   3   49.06    3.99
   6 -15   3    8.32    2.74
   6 -15   3    9.35    2.90
  -6  15  -3    9.52    2.40
   6  15   3    7.91    2.63
   6  15   3    8.37    1.91
   7 -15   3    0.24    2.30
   7  15   3    3.28    1.67
  -7  15  -3    2.92    2.12
   7  15   3    4.76    2.48
   8 -15   3   21.18    3.44
   8  15   3   18.14    2.53
  -8  15  -3   19.16    3.04
   8  15   3   21.93    3.49
   9 -15   3    1.31    2.67
  -9  15  -3    1.99    2.46
   9  15   3    1.41    2.58
  11 -16  -3   -1.77    2.47
 -11  16   3   -3.51    2.52
  11  16  -3    0.06    2.12
  10 -16  -3    5.05    2.71
  10  16  -3    6.10    2.42
 -10  16   3    4.06    2.72
  10  16  -3    4.01    2.18
   9 -16  -3   10.36    2.95
  -9  16   3   11.70    2.88
   9  16  -3   10.43    2.47
   9  16  -3   13.07    2.42
   8 -16  -3    0.46    2.15
   8  16  -3    0.71    1.62
  -8  16   3   -0.51    2.15
   8  16  -3    1.28    1.65
   7 -16  -3   13.95    2.83
   7  16  -3   13.98    2.32
  -7  16   3   18.70    3.03
   7  16  -3   15.36    2.48
   6 -16  -3   11.11    2.69
  -6  16   3   12.06    2.59
   6  16  -3    9.86    2.10
   6  16  -3    7.94    1.96
   5 -16  -3    4.84    2.35
   5  16  -3    1.23    1.50
   5  16  -3    3.46    1.81
  -5  16   3    7.13    2.57
  -4  16   3   19.07    2.69
  -4  16   3   17.35    1.33
   4  16  -3   15.53    1.38
   4  16  -3   13.93    2.12
  -3  16   3   14.03    1.36
  -3  16   3    8.42    2.21
   3  16  -3   12.29    1.43
   3  16  -3   10.61    1.96
   2  16  -3   11.01    1.51
  -2  16   3   15.58    2.25
  -2  16   3   11.84    1.48
   2  16  -3   12.84    1.86
   1  16  -3   70.23    3.11
   1  16  -3   72.83    3.69
  -1  16   3   74.27    3.54
  -1  16   3   65.51    3.60
   0  16   3   39.89    3.01
   0  16   3   44.07    2.97
   0  16  -3   36.31    2.93
   0  16  -3   38.15    2.78
  -1  16  -3   11.46    1.87
  -1  16  -3   12.64    2.00
   1  16   3    8.40    1.98
   1  16   3    9.85    1.82
   2  16   3   12.64    1.77
   2  16   3   13.23    2.35
  -2  16  -3   11.53    1.89
  -2  16  -3   13.50    2.18
  -3  16  -3   20.83    2.59
   3  16   3   23.50    1.89
   3  16   3   19.06    2.82
  -4  16  -3   52.51    3.70
   4  16   3   49.52    4.03
   5 -16   3    1.22    2.45
   5  16   3    2.69    1.55
  -5  16  -3    2.88    1.80
   5  16   3    2.59    2.30
   6 -16   3    0.24    2.52
   6 -16   3   -0.50    2.30
   6  16   3   -1.28    1.93
  -6  16  -3   -0.53    1.96
   6  16   3   -1.14    1.41
   7 -16   3   -1.72    2.22
   7  16   3    0.75    2.21
  -7  16  -3    0.97    2.02
   7  16   3    0.59    1.45
   8 -16   3   -1.10    2.46
   8  16   3    3.12    1.91
  -8  16  -3    0.67    2.23
   8  16   3    3.93    2.52
   9 -16   3   -1.38    2.52
  -9  16  -3   -2.41    2.17
   9  16   3    5.47    2.72
  11 -17  -3   -1.96    2.53
 -11  17   3   -3.76    2.57
  11  17  -3    0.73    2.24
  10 -17  -3   -1.52    2.41
  10  17  -3   -0.45    1.86
  10  17  -3    0.99    2.12
 -10  17   3   -1.37    2.52
   9 -17  -3    7.26    2.75
   9  17  -3    6.88    2.41
  -9  17   3    5.83    2.70
   9  17  -3   10.00    2.30
   8 -17  -3   24.62    3.45
   8  17  -3   22.25    2.85
   8  17  -3   22.10    2.89
  -8  17   3   26.93    3.45
   7 -17  -3    0.68    2.37
   7  17  -3    1.01    1.64
  -7  17   3    3.22    2.56
   7  17  -3    0.40    1.59
   6 -17  -3   20.16    3.10
   6  17  -3   16.87    2.55
  -6  17   3   18.60    2.84
   6  17  -3   21.17    2.56
   5 -17  -3   31.62    3.60
   5  17  -3   39.14    3.58
  -5  17   3   35.31    3.50
   5  17  -3   33.69    3.01
  -4  17   3   47.00    3.74
   4  17  -3   52.49    3.43
  -4  17   3   50.63    2.14
   4  17  -3   51.85    2.30
   3  17  -3   17.08    1.58
  -3  17   3   17.27    2.65
  -3  17   3   14.79    1.46
   3  17  -3   14.50    2.14
  -2  17   3   84.14    3.56
   2  17  -3   86.52    4.13
   2  17  -3   87.46    3.36
  -2  17   3   86.45    4.11
   1  17  -3    1.25    1.28
   1  17  -3    0.25    1.42
  -1  17   3    1.06    1.36
  -1  17   3   -1.02    1.84
   0  17   3   -0.17    1.45
   0  17  -3    1.04    1.46
   0  17  -3   -0.24    1.36
   0  17   3   -2.14    1.74
   1  17   3   30.23    2.41
   1  17   3   26.10    2.66
  -1  17  -3   27.73    2.57
  -1  17  -3   25.88    2.50
   2  17   3    8.00    1.75
  -2  17  -3    8.23    2.02
   2  17   3    9.60    2.23
  -2  17  -3    7.24    1.75
   3  17   3    0.92    1.44
   3  17   3    1.13    2.13
  -3  17  -3   -0.76    1.67
  -4  17  -3    2.68    1.75
   4  17   3    3.52    2.16
   5 -17   3    3.99    2.56
  -5  17  -3    4.63    2.10
   5  17   3    5.62    2.14
   6 -17   3    0.79    2.44
   6  17   3   -1.24    2.05
  -6  17  -3    1.61    2.06
   6  17   3   -0.04    1.56
   7 -17   3   -1.02    2.41
   7  17   3    1.66    1.74
   7  17   3    1.20    2.22
  -7  17  -3    1.00    2.12
   8 -17   3    1.65    2.59
   8  17   3    5.10    2.05
  -8  17  -3    1.88    2.35
   8  17   3    0.31    2.34
   9 -17   3    1.09    2.64
  -9  17  -3    2.21    2.44
   9  17   3   -3.92    2.42
  11 -18  -3    4.64    2.89
 -11  18   3    6.25    3.08
  11  18  -3    7.27    2.60
  10 -18  -3    0.87    2.62
  10  18  -3   -0.26    1.97
 -10  18   3    0.68    2.63
  10  18  -3    0.28    2.09
   9 -18  -3    7.67    2.87
   9  18  -3    7.71    2.51
   9  18  -3    9.02    2.29
  -9  18   3    8.33    2.86
   8 -18  -3   -2.70    2.31
  -8  18   3    2.37    2.63
   8  18  -3    3.01    1.90
   8  18  -3   -0.84    1.63
   7 -18  -3    2.73    2.61
  -7  18   3    4.62    2.44
   7  18  -3    6.21    1.99
   7  18  -3    1.21    1.66
   6 -18  -3   17.02    3.00
  -6  18   3   20.99    2.92
   6  18  -3   17.21    2.46
   6  18  -3   17.32    2.47
   5 -18  -3    7.90    2.74
   5  18  -3    6.42    1.81
  -5  18   3    5.00    2.34
   4  18  -3   -1.04    0.90
  -4  18   3    0.69    2.39
   4  18  -3   -0.25    1.53
   3  18  -3    4.10    1.21
   3  18  -3    4.39    1.78
  -3  18   3    5.94    2.47
  -3  18   3    4.95    1.15
  -2  18   3   10.44    2.20
   2  18  -3    7.37    1.71
  -2  18   3    7.75    1.49
   2  18  -3    9.10    1.55
   1  18  -3   43.42    2.82
  -1  18   3   44.38    3.01
   1  18  -3   40.71    3.08
  -1  18   3   39.89    3.48
   0  18  -3    4.23    1.65
   0  18  -3    1.10    1.54
   0  18   3    3.64    1.84
   0  18   3    3.21    1.57
   1  18   3   45.65    3.61
  -1  18  -3   47.49    3.11
   1  18   3   49.11    3.24
  -1  18  -3   49.36    3.33
  -2  18  -3    8.21    1.86
   2  18   3    9.05    1.86
  -2  18  -3    9.07    2.00
   2  18   3    6.81    2.12
  -3  18  -3    1.60    1.93
   3  18   3   -0.37    1.91
   4  18   3   65.44    4.59
  -4  18  -3   63.44    3.79
   5 -18   3   18.76    3.23
   5  18   3   20.21    3.04
  -5  18  -3   23.80    2.94
   6 -18   3    3.18    2.60
  -6  18  -3    3.23    2.22
   6  18   3    4.63    2.38
   7 -18   3   16.33    3.33
  -7  18  -3   20.85    3.09
   7  18   3   20.67    2.78
   7  18   3   21.80    3.29
   8 -18   3   -2.24    2.51
  -8  18  -3    1.15    2.43
   8  18   3    0.25    1.89
   8  18   3    0.02    2.41
   9 -18   3    3.22    2.84
  -9  18  -3   14.99    3.13
   9  18   3   15.17    3.49
  11 -19  -3   -1.95    2.46
 -11  19   3   -1.00    2.88
  11  19  -3    1.39    2.45
  10 -19  -3    2.62    2.91
  10  19  -3    7.14    2.53
  10  19  -3    8.03    2.75
 -10  19   3    2.95    2.81
   9 -19  -3   -1.78    2.52
  -9  19   3   -0.43    2.51
   9  19  -3   -0.19    1.82
   9  19  -3   -0.07    2.06
   8 -19  -3    4.88    2.75
   8  19  -3    2.07    1.79
   8  19  -3    9.29    2.41
  -8  19   3    4.75    2.54
   7 -19  -3    2.07    2.58
   7  19  -3    6.00    2.05
   7  19  -3    3.73    1.92
  -7  19   3   -0.62    2.45
   6 -19  -3   -0.89    2.36
   6  19  -3    1.34    1.68
   6  19  -3    4.40    1.87
  -6  19   3   -1.33    2.12
   5 -19  -3    2.17    2.49
   5  19  -3    4.59    1.65
  -5  19   3    1.70    2.37
   4  19  -3    3.44    1.08
   4  19  -3    2.66    1.77
  -4  19   3    3.21    2.47
  -3  19   3    1.51    1.08
   3  19  -3    0.00    1.10
   3  19  -3    2.63    1.60
  -3  19   3    0.51    2.36
  -2  19   3   38.04    3.24
   2  19  -3   38.33    3.26
   2  19  -3   30.26    2.47
  -2  19   3   36.99    2.75
   1  19  -3    0.47    1.42
  -1  19   3   -0.55    1.40
  -1  19   3    2.77    2.14
   1  19  -3    0.68    1.42
   0  19  -3   37.57    3.02
   0  19   3   36.46    2.87
   0  19  -3   33.31    3.12
   0  19   3   44.43    3.33
   1  19   3   14.23    2.15
  -1  19  -3   11.01    2.00
  -1  19  -3   10.83    2.17
   1  19   3    8.75    2.07
  -2  19  -3   41.70    3.21
   2  19   3   39.12    3.75
   2  19   3   44.79    3.15
  -2  19  -3   45.87    3.64
   3  19   3   18.31    2.69
  -3  19  -3   16.65    2.53
   4  19   3    2.27    1.88
  -4  19  -3    4.16    2.01
   5 -19   3   -0.83    2.57
   5  19   3   -2.16    1.90
  -5  19  -3    0.86    1.82
   6 -19   3    3.77    2.69
  -6  19  -3    4.10    2.27
   6  19   3    3.21    2.27
   7 -19   3    0.98    2.64
   7  19   3    5.31    2.08
  -7  19  -3    7.22    2.49
   7  19   3    2.62    2.50
   8 -19   3    0.19    2.66
   8  19   3    4.21    2.82
  -8  19  -3    2.42    2.42
   9 -19   3   -4.56    2.55
   9  19   3    0.46    2.77
  -9  19  -3   -1.12    2.37
  10 -20  -3    3.35    2.94
 -10  20   3   -2.79    2.61
  10  20  -3    2.78    2.46
  10  20  -3   -0.63    2.00
   9 -20  -3   -5.02    2.38
   9  20  -3   -0.92    1.81
  -9  20   3   -5.61    2.31
   9  20  -3   -1.65    2.02
   8 -20  -3    3.28    2.41
   8  20  -3    2.94    1.95
   8  20  -3    1.72    2.01
  -8  20   3   -0.54    2.48
   7 -20  -3    1.38    2.52
  -7  20   3    3.65    2.67
   7  20  -3    2.13    1.90
   7  20  -3    1.84    1.81
   6 -20  -3   -0.14    2.52
   6  20  -3    6.63    2.03
  -6  20   3    4.91    2.47
   5 -20  -3    3.98    2.65
   5  20  -3   10.96    2.16
  -5  20   3    8.89    2.65
   4  20  -3   25.01    2.86
  -4  20   3   29.75    3.13
  -3  20   3    0.15    2.38
  -3  20   3    0.78    1.12
   3  20  -3    1.10    1.23
   3  20  -3    2.39    1.79
  -2  20   3    6.26    2.37
   2  20  -3    7.01    1.91
   2  20  -3    4.56    1.45
  -2  20   3    6.04    1.51
  -1  20   3    2.95    1.59
  -1  20   3    2.80    2.14
   1  20  -3    2.91    1.63
   1  20  -3    4.39    1.80
   0  20  -3    2.30    1.68
   0  20   3    2.24    2.14
   0  20   3    1.86    1.67
   0  20  -3    3.68    1.70
   1  20   3    4.18    2.00
  -1  20  -3    2.64    1.87
  -1  20  -3    1.42    1.56
   1  20   3    0.98    1.76
  -2  20  -3   -0.08    1.45
  -2  20  -3    1.18    1.85
   2  20   3   -0.27    1.81
   2  20   3    0.29    1.63
   3  20   3   13.59    2.47
  -3  20  -3   11.04    2.35
   4  20   3   14.51    2.68
  -4  20  -3   12.50    2.50
  -5  20  -3   13.95    2.56
   5  20   3   15.05    2.86
   6 -20   3   -2.20    2.58
  -6  20  -3    0.81    2.19
   6  20   3   -0.26    2.10
   7 -20   3    5.27    3.02
  -7  20  -3    5.82    2.56
   7  20   3    6.90    2.82
   8 -20   3   -5.92    2.41
  -8  20  -3   -2.02    2.26
   8  20   3   -3.06    2.36
   9 -20   3   -2.42    2.64
   9  20   3   -0.98    2.63
  -9  20  -3    1.41    2.49
  10 -21  -3   -0.96    2.69
 -10  21   3    0.23    2.75
  10  21  -3    2.39    2.17
  10  21  -3   -0.87    2.27
   9 -21  -3   -0.73    2.45
   9  21  -3    1.22    2.34
   9  21  -3    1.20    2.05
  -9  21   3   -1.28    2.56
   8 -21  -3   21.84    3.64
   8  21  -3   16.65    3.09
  -8  21   3   19.66    3.43
   8  21  -3   19.13    2.90
   7 -21  -3    5.12    2.57
  -7  21   3    3.55    2.62
   7  21  -3    1.36    1.89
   6 -21  -3    9.77    2.79
  -6  21   3   11.45    2.76
   6  21  -3    8.24    2.23
   5 -21  -3    7.64    2.54
  -5  21   3   10.60    2.54
   5  21  -3    6.94    2.01
   4  21  -3    0.56    1.63
  -4  21   3    2.75    2.37
  -3  21   3   25.34    2.17
   3  21  -3   22.87    1.92
   3  21  -3   21.88    2.71
  -3  21   3   23.47    2.85
  -2  21   3   95.47    4.88
  -2  21   3   95.36    4.09
   2  21  -3   94.13    4.88
   2  21  -3   93.02    3.80
   1  21  -3   53.37    3.21
   1  21  -3   54.65    3.68
  -1  21   3   54.69    3.60
  -1  21   3   52.07    3.93
   0  21   3    2.16    1.72
   0  21   3    2.32    2.10
   0  21  -3    2.90    1.77
   0  21  -3    1.49    1.71
   1  21   3    4.82    1.90
   1  21   3    3.00    1.86
  -1  21  -3    1.88    1.88
  -1  21  -3    3.21    1.63
  -2  21  -3    2.65    1.65
   2  21   3    3.55    1.97
   2  21   3    3.42    1.66
  -2  21  -3    4.25    1.94
  -3  21  -3   33.75    3.21
   3  21   3   26.16    3.05
  -3  21  -3   27.54    2.73
  -4  21  -3    2.98    2.12
   4  21   3    5.49    2.34
  -5  21  -3    0.42    2.03
   5  21   3   -0.78    1.81
   6 -21   3    0.19    2.67
  -6  21  -3    0.35    2.20
   6  21   3   -0.59    2.20
   7 -21   3   -3.50    2.59
   7  21   3    6.62    2.85
  -7  21  -3    2.37    2.44
   8 -21   3    0.99    2.83
   8  21   3    2.66    2.74
  -8  21  -3    1.92    2.56
  10 -22  -3   -1.04    2.77
 -10  22   3    0.02    2.76
  10  22  -3    0.79    2.11
  10  22  -3   -0.47    2.43
   9 -22  -3    6.20    3.20
   9  22  -3    6.62    2.70
  -9  22   3    7.39    3.04
   9  22  -3    8.86    2.56
   8 -22  -3    3.59    2.88
  -8  22   3    1.60    2.73
   8  22  -3    3.32    2.08
   7 -22  -3   -2.42    2.55
  -7  22   3   -1.65    2.26
   7  22  -3    1.91    1.87
   6 -22  -3   -1.91    2.65
  -6  22   3   -1.35    2.14
   6  22  -3    0.57    1.78
   5 -22  -3    3.42    2.70
  -5  22   3    5.17    2.57
   5  22  -3    2.03    1.79
   4  22  -3    1.40    1.71
  -4  22   3    1.18    2.35
   3  22  -3    1.36    1.68
   3  22  -3   -0.08    1.16
  -3  22   3    1.20    1.98
  -3  22   3    1.28    1.06
   2  22  -3   22.61    2.13
  -2  22   3   20.61    2.20
  -2  22   3   22.77    2.87
   2  22  -3   18.53    2.58
   1  22  -3    2.93    1.81
  -1  22   3    2.51    1.61
   1  22  -3    2.30    1.56
  -1  22   3    2.58    2.14
   0  22  -3   14.95    2.20
   0  22  -3   12.72    2.26
   0  22   3   11.88    2.12
   0  22   3   10.16    2.34
   1  22   3   10.74    2.18
  -1  22  -3   15.62    2.23
   1  22   3   17.79    2.25
  -1  22  -3   18.95    2.53
  -2  22  -3    1.33    1.68
   2  22   3   -2.92    1.54
   2  22   3   -1.86    1.50
  -2  22  -3   -0.76    1.37
   3  22   3   30.98    3.22
  -3  22  -3   27.38    2.73
  -3  22  -3   29.34    3.10
  -4  22  -3   17.96    2.70
   4  22   3   14.84    2.65
   5  22   3    6.25    2.26
  -5  22  -3    3.14    2.30
   6 -22   3   -2.07    2.67
  -6  22  -3    0.95    2.28
   6  22   3    2.92    2.38
   7 -22   3    4.01    3.14
   7  22   3    6.81    2.90
  -7  22  -3   10.88    2.87
   8 -22   3   -4.42    2.64
  -8  22  -3   -1.55    2.39
   8  22   3   -2.54    2.49
  10 -23  -3   -5.85    2.44
 -10  23   3   -5.76    2.69
  10  23  -3    2.14    2.19
  10  23  -3   -3.32    2.30
   9 -23  -3   -4.47    2.69
  -9  23   3   -4.82    2.55
   9  23  -3    0.02    2.06
   8 -23  -3   -3.20    2.66
   8  23  -3   -1.24    1.83
  -8  23   3    1.91    2.70
   7 -23  -3   -4.36    2.51
   7  23  -3    3.06    1.95
  -7  23   3   -5.17    2.30
   6 -23  -3   -2.57    2.59
  -6  23   3    4.04    2.52
   6  23  -3    2.72    1.88
  -5  23   3    2.24    2.56
   5  23  -3    0.11    1.76
   4  23  -3   -0.20    1.61
  -4  23   3    0.52    2.14
   3  23  -3    7.52    1.50
  -3  23   3    8.40    2.32
   3  23  -3    8.58    2.10
  -3  23   3    6.43    1.38
   2  23  -3    1.45    1.70
  -2  23   3   -0.51    2.11
  -2  23   3    1.45    1.35
   2  23  -3    1.92    1.34
  -1  23   3   15.57    2.48
   1  23  -3   15.96    2.48
   1  23  -3   16.77    2.13
  -1  23   3   14.84    2.10
   0  23   3   16.54    2.33
   0  23   3   15.97    2.34
   0  23  -3   16.48    2.26
   0  23  -3   15.59    2.39
   1  23   3    2.94    1.81
  -1  23  -3    0.13    1.47
  -1  23  -3    1.83    1.61
   1  23   3    0.94    1.84
  -2  23  -3    0.05    1.75
   2  23   3   -1.43    1.70
  -2  23  -3   -0.41    1.55
  -3  23  -3    3.84    1.95
  -3  23  -3    4.16    1.76
   3  23   3    3.23    2.04
  -4  23  -3   -1.35    1.98
   4  23   3    1.20    2.13
  -5  23  -3    2.30    2.24
   5  23   3   -0.77    1.99
   6 -23   3   -1.91    2.73
   6  23   3   -0.34    2.01
  -6  23  -3   -1.47    2.14
   7 -23   3   -3.89    2.70
  -7  23  -3    3.12    2.56
   7  23   3    3.13    2.58
   8 -23   3   -0.61    2.85
  -8  23  -3   -4.64    2.37
   8  23   3    0.96    2.68
   9 -24  -3   -1.58    2.85
  -9  24   3   -2.44    2.69
   9  24  -3   -0.19    2.01
   8 -24  -3   -0.74    2.80
  -8  24   3   -4.98    2.52
   8  24  -3    3.62    2.16
   7 -24  -3   -6.15    2.47
  -7  24   3   -3.42    2.45
   7  24  -3    2.23    2.00
   6 -24  -3    1.81    2.80
   6  24  -3   -1.16    1.71
  -6  24   3   -1.13    2.24
  -5  24   3   -1.34    2.24
   5  24  -3    1.81    1.69
  -4  24   3   -0.98    2.41
   4  24  -3   -0.79    1.65
   3  24  -3    1.05    1.20
  -3  24   3   -0.63    2.25
   3  24  -3    0.66    1.73
  -3  24   3    2.86    1.25
  -2  24   3   24.14    2.91
   2  24  -3   22.84    2.25
  -2  24   3   19.72    2.19
   2  24  -3   19.11    2.65
  -1  24   3   19.92    2.32
  -1  24   3   21.20    2.75
   1  24  -3   21.28    2.30
   1  24  -3   21.93    2.67
   0  24  -3   15.56    2.22
   0  24   3   14.21    2.30
   0  24   3   14.84    2.28
   0  24  -3   12.49    2.27
  -1  24  -3   22.42    2.67
  -1  24  -3   22.32    2.59
   1  24   3   29.55    2.62
   1  24   3   21.42    2.70
  -2  24  -3   -1.28    1.42
   2  24   3   -0.74    1.79
  -2  24  -3   -0.55    1.87
   3  24   3    2.78    1.90
  -3  24  -3    4.45    2.19
  -3  24  -3    3.27    1.77
  -4  24  -3    8.35    2.44
   4  24   3    6.24    2.42
  -5  24  -3   13.11    2.66
   5  24   3   15.00    2.92
   6 -24   3   -5.16    2.68
  -6  24  -3   -2.83    1.90
   6  24   3   -1.36    2.23
   7 -24   3    6.43    3.26
   7  24   3    7.14    2.97
  -7  24  -3    6.08    2.61
   8 -24   3   -3.58    2.77
   8  24   3   -2.08    2.44
  -8  24  -3   -0.43    2.53
   9 -25  -3    2.05    3.13
   9  25  -3    1.79    2.20
  -9  25   3    2.06    2.89
   8 -25  -3   23.57    4.06
  -8  25   3   26.93    3.65
   8  25  -3   21.79    3.29
   7 -25  -3   14.20    3.45
  -7  25   3   19.21    3.46
   7  25  -3   14.57    2.84
   6 -25  -3    1.17    2.81
   6  25  -3    1.52    1.91
  -6  25   3   -0.70    2.33
  -5  25   3   21.29    3.32
   5  25  -3   22.46    3.05
   4  25  -3    3.00    1.79
  -4  25   3   -1.12    2.22
   3  25  -3    7.35    2.15
  -3  25   3    8.13    1.51
  -3  25   3    8.77    2.70
  -2  25   3    2.49    2.18
   2  25  -3    3.60    1.75
   2  25  -3    2.68    1.56
  -2  25   3    0.50    1.32
  -1  25   3    3.18    2.12
  -1  25   3    1.91    1.58
   1  25  -3    2.58    1.58
   1  25  -3    3.06    1.86
   0  25  -3   15.05    2.47
   0  25  -3   16.00    2.34
   0  25   3   11.01    2.24
   0  25   3   12.98    2.32
   1  25   3   12.58    2.23
   1  25   3   12.37    2.33
  -1  25  -3   13.66    2.29
  -1  25  -3   15.94    2.46
  -2  25  -3    0.16    1.92
  -2  25  -3    0.97    1.54
   2  25   3    1.69    1.87
  -3  25  -3    9.39    2.30
  -3  25  -3    8.31    2.03
   3  25   3    6.53    2.29
  -4  25  -3    0.26    2.14
   4  25   3    3.14    2.26
  -5  25  -3    8.22    2.65
   5  25   3    6.90    2.46
   6 -25   3   -1.30    3.01
   6  25   3   -0.91    2.28
  -6  25  -3   -0.53    2.36
   7 -25   3   -0.65    2.99
  -7  25  -3    0.05    2.53
   7  25   3   -2.62    2.37
   8 -25   3   -0.83    3.20
  -8  25  -3    7.39    2.74
   8  25   3   -0.18    2.67
   9 -26  -3   -3.91    2.88
  -9  26   3    3.57    3.02
   9  26  -3    1.96    2.21
   8 -26  -3    1.78    3.10
   8  26  -3    5.66    2.41
  -8  26   3   -1.47    2.80
   7 -26  -3    0.67    2.93
   7  26  -3    3.31    2.16
  -7  26   3   -1.83    2.42
   6 -26  -3   -2.24    2.83
   6  26  -3    0.95    1.93
  -6  26   3   -0.27    2.45
   5  26  -3    1.50    1.97
  -5  26   3   -0.56    2.61
   4  26  -3    8.89    2.34
  -4  26   3    0.23    2.50
   3  26  -3   -0.86    1.78
  -3  26   3   -1.25    2.36
  -2  26   3   -0.73    2.16
   2  26  -3    1.54    1.69
   2  26  -3    1.30    1.50
  -2  26   3    4.47    1.58
  -1  26   3    3.37    2.13
   1  26  -3    3.19    1.75
  -1  26   3    2.87    1.56
   1  26  -3    3.00    1.89
   0  26   3    2.23    1.70
   0  26   3    2.25    1.99
   0  26  -3    1.93    1.67
   0  26  -3    3.30    1.79
  -1  26  -3    3.38    1.82
   1  26   3    0.68    1.94
  -1  26  -3    3.38    2.00
   1  26   3    1.86    1.91
   2  26   3    8.11    2.30
  -2  26  -3   10.58    2.46
  -2  26  -3    8.23    2.04
  -3  26  -3    0.57    2.11
   3  26   3    5.72    2.27
  -3  26  -3   -0.19    1.72
   4  26   3    1.55    2.21
  -4  26  -3    1.29    2.22
  -5  26  -3    0.81    2.14
   5  26   3   -1.33    1.87
   6 -26   3   -0.45    3.05
   6  26   3   -1.08    2.25
  -6  26  -3   -0.87    2.22
   7 -26   3   -0.09    3.07
   7  26   3   -3.48    2.22
  -7  26  -3    1.33    2.57
   9 -27  -3   -4.90    2.82
  -9  27   3   -4.02    2.45
   9  27  -3    0.19    2.22
   8 -27  -3    2.66    3.22
   8  27  -3    3.56    2.37
  -8  27   3    0.61    2.87
   7 -27  -3    2.08    3.11
   7  27  -3    3.32    2.26
  -7  27   3    4.01    2.72
   6 -27  -3    1.91    3.14
   6  27  -3    8.83    2.53
  -6  27   3    6.11    2.74
  -5  27   3   10.92    3.06
   5  27  -3    7.36    2.22
   4  27  -3    4.52    2.13
  -4  27   3    6.02    2.68
  -3  27   3    0.44    2.36
   3  27  -3   -0.56    1.79
  -2  27   3    4.03    2.42
   2  27  -3    5.51    1.73
  -2  27   3    4.06    1.68
   2  27  -3    4.51    2.04
  -1  27   3    2.33    1.57
   1  27  -3    0.05    1.60
  -1  27   3    1.01    2.22
   1  27  -3    1.90    1.84
   0  27   3   17.39    2.47
   0  27  -3   18.57    2.52
   0  27  -3   18.65    2.75
   0  27   3   18.74    2.78
  -1  27  -3   12.59    2.27
   1  27   3   12.95    2.47
  -1  27  -3   13.99    2.50
  -2  27  -3    3.04    1.84
  -2  27  -3   -2.94    1.87
   2  27   3    1.63    1.89
  -3  27  -3   -1.96    1.61
   3  27   3    0.31    1.96
  -3  27  -3   -0.40    2.09
   4  27   3   -0.76    2.06
  -4  27  -3    2.73    2.36
   5  27   3    0.06    2.22
  -5  27  -3   -1.96    2.24
   6 -27   3   -2.80    3.01
  -6  27  -3   -1.58    2.48
   6  27   3   -1.61    2.29
   7 -27   3   -0.90    3.05
   7  27   3    3.97    2.74
  -7  27  -3    2.64    2.73
   8 -28  -3   -4.68    3.00
   8  28  -3    0.51    2.17
  -8  28   3   -0.89    2.82
   7 -28  -3    4.47    3.32
   7  28  -3    2.91    2.27
  -7  28   3   -1.63    2.65
   6 -28  -3    6.54    3.37
   6  28  -3    9.77    2.66
  -6  28   3   11.85    3.20
   5  28  -3    5.76    2.32
  -5  28   3   -2.28    2.29
  -4  28   3    2.36    2.64
   4  28  -3    0.73    1.91
  -3  28   3    0.57    2.36
   3  28  -3    0.01    1.80
  -2  28   3    4.17    2.39
   2  28  -3    1.81    1.78
   2  28  -3    2.24    1.65
  -2  28   3    2.29    1.53
  -1  28   3    7.85    1.99
   1  28  -3    8.94    2.33
   1  28  -3   10.08    2.06
  -1  28   3    8.34    2.57
   0  28  -3   -0.50    1.75
   0  28   3    1.52    1.65
   0  28  -3   -0.35    1.79
   0  28   3   -1.55    2.06
  -1  28  -3   28.72    3.07
  -1  28  -3   28.30    3.10
   1  28   3   27.13    3.12
   2  28   3   19.15    2.90
  -2  28  -3   19.57    2.73
  -2  28  -3   25.03    3.13
   3  28   3    6.54    2.30
  -3  28  -3    7.17    2.51
  -3  28  -3    4.47    2.04
   4  28   3   31.78    3.70
  -4  28  -3   30.27    3.64
   5  28   3   -2.11    2.08
  -5  28  -3    0.09    2.41
   6 -28   3    0.89    3.37
  -6  28  -3    5.55    2.82
   6  28   3    5.87    2.72
   7 -28   3    4.17    3.37
   7  28   3    3.97    2.73
  -7  28  -3    8.66    3.06
   8 -29  -3    6.45    3.59
  -8  29   3    7.23    3.26
   8  29  -3    8.86    2.82
   7 -29  -3   -0.01    3.25
  -7  29   3    6.81    3.13
   7  29  -3    8.81    2.79
   6 -29  -3    1.34    3.30
  -6  29   3    8.81    3.19
   6  29  -3    7.28    2.58
  -5  29   3   10.88    3.19
   5  29  -3   15.43    2.91
   4  29  -3    1.40    2.03
  -4  29   3    2.27    2.62
  -3  29   3   10.01    2.88
   3  29  -3    7.76    2.23
  -2  29   3    7.17    1.87
   2  29  -3    5.93    2.10
  -2  29   3    4.94    2.52
   1  29  -3    1.70    1.89
  -1  29   3    1.32    1.60
  -1  29   3   -0.52    2.09
   1  29  -3   -0.32    1.69
   0  29  -3   -0.81    1.66
   0  29   3   -0.81    1.57
   0  29  -3   -1.70    1.76
   0  29   3   -0.42    2.04
  -1  29  -3    0.87    1.94
  -1  29  -3    3.21    1.83
   1  29   3    2.90    2.02
  -2  29  -3   -0.25    2.01
   2  29   3   -0.49    1.85
  -2  29  -3    1.62    1.83
   3  29   3   -1.55    1.83
  -3  29  -3   -1.68    1.94
  -3  29  -3   -2.31    1.62
  -4  29  -3   -0.76    2.07
   4  29   3    0.12    2.04
  -5  29  -3    0.33    2.30
   5  29   3   -2.40    2.16
   6 -29   3   -0.37    3.26
   6  29   3    1.82    2.47
  -6  29  -3    2.11    2.61
   8 -30  -3   -5.22    2.95
  -8  30   3   -6.10    2.62
   8  30  -3   -0.25    2.21
   7 -30  -3   -3.70    3.06
  -7  30   3   -1.32    2.81
   7  30  -3    1.77    2.27
   6 -30  -3   -1.92    3.21
   6  30  -3    0.85    2.21
  -6  30   3   -1.81    2.68
   5  30  -3    0.44    2.04
  -5  30   3   -3.04    2.62
   4  30  -3    0.66    2.04
  -4  30   3   -0.39    2.56
   3  30  -3   -0.35    1.91
  -3  30   3   -1.30    2.38
  -2  30   3   -0.71    2.30
  -2  30   3    4.13    1.68
   2  30  -3    2.31    1.99
   1  30  -3   -0.14    1.79
   1  30  -3    0.92    1.85
  -1  30   3    0.72    1.55
  -1  30   3   -1.12    2.16
   0  30  -3    4.72    2.05
   0  30  -3    3.04    1.97
   0  30   3    1.17    1.84
   0  30   3   -0.14    2.19
   1  30   3    0.43    1.79
  -1  30  -3   -0.61    1.89
  -1  30  -3    3.34    1.90
  -2  30  -3    0.53    2.08
  -2  30  -3   -0.47    1.58
   2  30   3   -2.13    1.77
   3  30   3    2.41    2.19
  -3  30  -3    0.23    2.26
  -3  30  -3   -1.78    1.67
   4  30   3    0.81    2.13
  -4  30  -3   -0.06    2.42
   5  30   3   -0.65    2.21
  -5  30  -3   -2.10    2.45
   6 -30   3   -9.01    3.25
  -6  30  -3    0.38    2.67
   6  30   3    6.27    2.71
   7 -31  -3   -5.05    3.08
   7  31  -3    0.86    2.33
  -7  31   3   -0.63    2.88
   6 -31  -3   -1.42    3.34
   6  31  -3    5.88    2.51
  -6  31   3    1.16    3.00
  -5  31   3   18.40    3.35
   5  31  -3   27.30    3.76
  -4  31   3   -3.85    2.34
   4  31  -3    1.86    1.97
   3  31  -3   11.26    2.73
  -3  31   3    5.47    2.66
  -2  31   3   12.50    2.86
   2  31  -3   11.78    2.66
  -1  31   3    1.24    2.22
   1  31  -3    1.25    1.90
   1  31  -3   -0.01    1.81
  -1  31   3    1.00    1.76
   0  31   3   15.21    2.57
   0  31  -3   13.59    2.59
   0  31  -3   16.52    2.74
  -1  31  -3    2.41    2.11
  -1  31  -3    6.22    2.08
   1  31   3    1.90    1.97
   2  31   3    1.16    1.95
  -2  31  -3    0.03    1.72
  -2  31  -3   -0.05    2.10
  -3  31  -3    7.86    2.28
   3  31   3    2.52    2.31
  -3  31  -3    6.71    2.69
  -4  31  -3    2.09    2.59
   4  31   3    0.46    2.23
   5  31   3    1.64    2.38
  -5  31  -3   -3.26    2.39
   6 -31   3   -2.54    3.25
   6  31   3   -0.02    2.35
  -6  31  -3    0.90    2.62
   7 -32  -3   -5.72    3.21
  -7  32   3   -0.39    2.97
   7  32  -3    1.87    2.45
   6 -32  -3   -6.75    3.21
   6  32  -3    0.63    2.21
  -6  32   3   -1.42    2.93
  -5  32   3   -0.23    2.73
   5  32  -3    1.81    2.31
  -4  32   3    0.31    2.78
   4  32  -3    2.34    2.30
   3  32  -3    0.97    2.09
  -3  32   3   -5.68    2.41
   2  32  -3    4.22    2.34
  -2  32   3   -1.16    2.32
   1  32  -3    0.72    1.93
  -1  32   3    2.73    1.90
  -1  32   3   -0.21    2.36
   1  32  -3    5.47    2.25
   0  32   3    7.88    2.25
   0  32  -3    9.40    2.47
   0  32  -3    8.03    2.34
   1  32   3   12.52    2.66
  -1  32  -3   13.13    2.88
  -1  32  -3   10.23    2.43
   2  32   3    5.85    2.41
  -2  32  -3    3.55    2.45
  -2  32  -3    2.49    2.08
  -3  32  -3    8.66    2.80
   3  32   3    6.23    2.57
  -3  32  -3    6.57    2.29
  -4  32  -3    9.65    3.02
   4  32   3    5.99    2.61
   5  32   3    2.16    2.40
  -5  32  -3   -2.14    2.46
   6 -33  -3    0.80    3.58
   6  33  -3    1.10    2.40
  -6  33   3   -0.34    2.91
  -5  33   3    0.35    2.89
   5  33  -3   -0.72    2.12
   4  33  -3    0.52    1.95
  -4  33   3   -0.18    2.62
  -3  33   3   -3.91    2.40
   3  33  -3    2.26    2.24
   2  33  -3    5.85    2.44
  -2  33   3    5.46    2.60
  -1  33   3    1.04    2.54
  -1  33   3    5.86    2.11
   1  33  -3    7.52    2.49
   0  33  -3    1.50    1.97
   0  33  -3   -2.15    1.89
   0  33   3    0.03    1.77
  -1  33  -3    2.02    1.95
   1  33   3    1.57    2.04
  -1  33  -3   -2.43    2.05
   2  33   3    3.06    2.25
  -2  33  -3    4.77    2.65
  -2  33  -3    5.74    2.26
  -3  33  -3    4.44    2.61
   3  33   3    2.18    2.36
   4  33   3   -0.30    2.17
  -4  33  -3   -0.97    2.46
   5  33   3    0.68    2.38
  -5  33  -3   -4.77    2.36
   6 -34  -3   -5.04    3.42
  -6  34   3   -2.57    2.87
   6  34  -3    2.04    2.46
  -5  34   3    0.03    2.95
   5  34  -3    3.31    2.46
   4  34  -3   10.58    2.90
  -4  34   3    2.64    2.94
  -3  34   3   -3.22    2.50
   3  34  -3    2.51    2.38
   2  34  -3    1.29    2.16
  -2  34   3   -5.35    2.40
   1  34  -3    3.07    2.22
  -1  34   3   -0.52    2.53
  -1  34   3    3.31    1.87
   0  34  -3    3.42    2.28
   0  34   3    4.70    2.13
   0  34  -3    2.78    2.31
  -1  34  -3   16.87    2.88
   1  34   3   16.11    2.98
  -1  34  -3   17.27    3.13
  -2  34  -3    5.74    2.68
   2  34   3    8.67    2.72
  -2  34  -3    4.16    2.24
   3  34   3   -0.06    2.15
  -3  34  -3    2.14    2.59
   4  34   3    3.72    2.62
  -4  34  -3    0.77    2.59
  -5  35   3   11.59    3.47
   5  35  -3   16.58    3.42
   4  35  -3    2.44    2.42
  -4  35   3   -4.66    2.48
   3  35  -3    1.63    2.25
  -3  35   3   -2.20    2.46
  -2  35   3   -6.20    2.46
   2  35  -3    1.81    2.22
   1  35  -3    2.10    2.12
   0  35  -3    1.26    2.17
   0  35  -3   -0.11    2.19
   0  35   3    2.13    2.09
   1  35   3    1.06    2.08
  -1  35  -3    3.36    2.16
  -1  35  -3   -0.22    2.24
   2  35   3    2.01    2.34
  -2  35  -3   -0.48    2.59
  -2  35  -3   -2.42    1.92
  -3  35  -3   -0.87    2.50
   3  35   3   -3.12    2.13
   4  36  -3    1.26    2.40
  -4  36   3   -4.63    2.57
   3  36  -3    4.15    2.45
  -3  36   3   -4.86    2.51
  -2  36   3   -1.42    2.70
   2  36  -3    0.63    2.22
   1  36  -3    4.66    2.44
   0  36   3    3.84    2.24
   0  36  -3    3.18    2.37
   1  36   3    1.52    2.22
  -1  36  -3    5.56    2.42
  -1  36  -3    2.04    2.54
   2  36   3    1.16    2.22
  -2  36  -3   -0.01    1.92
  -2  36  -3   -1.18    2.43
  -3  36  -3    0.28    2.62
   3  36   3   -1.30    2.09
   3  37  -3    3.54    2.48
  -3  37   3   -1.19    2.73
  -2  37   3   -2.93    2.68
   2  37  -3    1.11    2.32
   1  37  -3    1.80    2.25
   0  37   3    3.08    2.20
   0  37  -3    4.69    2.34
  -1  37  -3    5.13    2.36
  -1  37  -3    1.93    2.47
   1  37   3    0.26    2.17
  -2  37  -3   -1.67    2.41
   2  37   3    0.84    2.22
   2  38  -3    3.60    2.44
   1  38  -3    5.43    2.64
   0  38  -3    1.99    2.19
   0  38   3    0.72    1.90
  12   0  -4    2.08    2.16
  11   0  -4    5.07    2.28
  10   0  -4   10.92    2.39
   9   0  -4    1.98    1.82
   8   0  -4    4.45    1.85
  -8   0   4   10.11    2.08
  -7   0   4   32.74    2.77
   7   0  -4   34.49    2.11
   7   0  -4   28.77    2.78
   6   0  -4  112.44    3.56
  -6   0   4  112.38    4.33
   6   0  -4  116.76    4.80
   5   0  -4   17.93    1.50
  -5   0   4   16.52    1.90
   5   0  -4   15.73    1.82
   4   0  -4  466.32   10.93
  -4   0   4  458.67   10.04
   4   0  -4  460.51   10.54
  -3   0   4    8.51    1.29
   3   0  -4    8.62    1.04
   3   0  -4    7.83    1.06
   3   0  -4   10.13    1.24
   2   0  -4  260.52    6.04
   2   0  -4  251.89    6.10
   1   0  -4    4.36    1.00
   1   0  -4    5.44    0.59
   0   0  -4    1.98    0.90
  -1   0  -4   -0.20    0.91
   1   0   4    0.12    1.68
   1   0   4    0.43    0.62
   2   0   4   51.52    4.06
  -2   0  -4   51.45    2.52
   2   0   4   50.49    2.18
  -3   0  -4    4.20    1.33
   3   0   4    4.40    1.14
   3   0   4    0.73    2.40
  -4   0  -4    7.58    1.52
   4   0   4    6.78    1.48
   4   0   4    7.85    2.99
   5   0   4    1.25    2.96
  -5   0  -4    2.32    1.41
   5   0   4    1.00    1.42
   6   0   4   45.08    3.31
   6   0   4   37.50    4.06
  -6   0  -4   43.28    2.89
   7   0   4    3.41    1.75
   7   0   4    5.13    3.16
  -7   0  -4    5.26    1.64
   8   0   4   27.92    3.04
   8   0   4   24.21    3.93
   9   0   4   16.34    3.84
   9   0   4   16.10    2.78
  12  -1  -4    1.60    2.22
  12   1  -4    0.79    2.10
  11  -1  -4    2.49    2.08
  11   1  -4    2.46    2.07
  10  -1  -4    0.45    1.89
  10   1  -4    3.87    2.07
   9  -1  -4    2.35    1.84
   9   1  -4   -0.56    1.60
  -9   1   4   -1.43    1.84
   8  -1  -4   -2.28    1.42
  -8  -1   4    1.75    1.76
  -8   1   4   -2.77    1.78
   8   1  -4    2.42    1.70
  -7  -1   4   -1.39    1.77
   7  -1  -4    0.85    1.56
   7   1  -4   -0.33    0.95
  -7   1   4   -1.34    1.95
   7   1  -4    0.50    1.50
   6  -1  -4    3.88    0.92
   6  -1  -4    2.33    1.46
  -6  -1   4    5.00    1.74
   6   1  -4    2.88    1.01
   6   1  -4    1.43    1.40
  -6   1   4    5.08    1.82
   5  -1  -4   40.89    1.83
   5  -1  -4   39.95    2.78
  -5  -1   4   32.12    2.34
  -5   1   4   36.38    2.76
   5   1  -4   39.11    2.01
   5   1  -4   41.46    2.80
   4  -1  -4   23.27    1.51
   4  -1  -4   25.43    2.09
  -4  -1   4   21.06    1.72
   4   1  -4   19.91    1.64
   4   1  -4   23.52    2.07
  -4   1   4   21.56    1.89
   3  -1  -4   41.60    2.19
   3   1  -4   47.13    2.12
  -3   1   4   43.22    2.20
   3   1  -4   42.90    2.26
   3   1  -4   44.40    2.24
   2  -1  -4    7.12    0.85
   2  -1  -4   10.31    1.34
   1  -1  -4   13.45    1.38
   1  -1  -4   16.23    0.86
   1   1  -4   14.79    1.35
   0  -1  -4  132.89    3.85
   0   1  -4  129.64    3.81
   1  -1   4    5.57    0.89
  -1  -1  -4    6.13    1.16
   1   1   4    5.66    0.60
   1   1   4    3.58    1.77
  -1   1  -4    6.04    1.21
   2  -1   4  124.63    4.88
  -2  -1  -4  125.57    3.88
   2  -1   4  123.38    3.68
  -2   1  -4  121.42    3.95
   2   1   4  124.26    5.35
   2   1   4  123.07    3.46
   3  -1   4   43.00    2.48
   3  -1   4   51.00    4.43
  -3  -1  -4   47.97    2.48
   3   1   4   43.25    2.43
   3   1   4   41.23    3.54
  -3   1  -4   43.73    2.60
   4  -1   4   17.50    3.25
  -4  -1  -4   17.66    1.84
   4  -1   4   14.35    1.76
   4   1   4   14.44    1.63
  -4   1  -4   18.07    1.98
   4   1   4   18.31    3.26
   5  -1   4   21.43    3.51
   5  -1   4   20.39    2.22
  -5  -1  -4   18.92    2.04
  -5   1  -4   19.17    2.08
   5   1   4   19.37    2.05
   5   1   4   21.50    3.61
  -6  -1  -4    4.35    1.41
   6  -1   4    1.32    1.53
   6  -1   4    3.49    3.03
   6   1   4    1.83    1.47
   6   1   4    2.52    2.87
  -6   1  -4    0.88    1.39
   7  -1   4   -0.40    2.83
   7  -1   4   -0.95    1.57
   7   1   4   -0.61    2.71
   7   1   4    0.96    1.59
  -7   1  -4   -1.06    1.37
   8  -1   4    8.21    2.23
   8  -1   4    4.28    3.24
   8   1   4    4.91    1.92
   8   1   4    5.39    3.18
   9  -1   4   -6.19    2.74
   9  -1   4   -1.70    1.83
   9   1   4   -5.71    2.71
   9   1   4   -1.43    1.80
  12  -2  -4    0.96    2.17
  12   2  -4    0.90    2.16
  11  -2  -4    0.11    1.92
  11   2  -4   -1.19    1.83
  10  -2  -4    2.81    1.90
  10   2  -4    4.12    2.04
   9  -2  -4    7.51    2.21
   9   2  -4   11.52    2.36
  -9   2   4    7.60    2.26
  -8  -2   4   -1.62    1.58
   8  -2  -4    0.39    1.58
   8   2  -4   -1.67    1.42
  -8   2   4   -0.97    1.84
   7  -2  -4    0.48    1.56
  -7  -2   4   -1.52    1.72
   7   2  -4    0.93    1.42
   7   2  -4   -1.16    0.97
  -7   2   4    3.82    2.02
  -6  -2   4   11.93    1.87
   6  -2  -4   13.91    2.00
   6  -2  -4   16.71    1.33
  -6   2   4   14.34    2.15
   6   2  -4   14.59    1.90
   6   2  -4   11.95    1.40
   5  -2  -4   41.44    2.86
  -5  -2   4   41.48    2.59
   5  -2  -4   41.88    1.76
   5   2  -4   40.55    2.87
  -5   2   4   46.47    3.05
   5   2  -4   47.36    2.29
   4  -2  -4    0.41    0.97
   4   2  -4   -0.38    0.81
  -4   2   4    1.54    1.31
   3  -2  -4   14.92    1.34
   3   2  -4   19.33    1.59
  -3   2   4   19.58    1.72
   3   2  -4   19.58    1.58
   3   2  -4   20.70    1.72
   2  -2  -4   -0.20    0.93
   2  -2  -4   -0.15    0.60
   2   2  -4    0.57    0.86
   2   2  -4    0.27    0.78
   2   2  -4   -0.91    0.61
   1  -2  -4   -0.08    0.89
   1  -2  -4    0.04    0.37
   1   2  -4   -0.97    0.76
   0  -2  -4    3.24    0.97
   0   2   4    4.05    1.56
   0   2  -4    5.19    1.14
  -1  -2  -4    6.24    1.09
   1   2   4    7.74    1.92
   1   2   4    5.74    0.52
  -1   2  -4    8.17    1.30
  -2  -2  -4   29.09    1.99
   2  -2   4   21.74    2.00
   2  -2   4   20.63    2.57
   2   2   4   28.88    1.54
   2   2   4   21.82    2.48
  -2   2  -4   18.64    1.80
   3  -2   4    1.10    1.14
   3  -2   4   -0.08    1.96
  -3  -2  -4    1.23    1.13
   3   2   4    2.29    2.39
   3   2   4   -1.58    0.80
  -3   2  -4    0.21    1.17
   4  -2   4    4.04    2.82
   4  -2   4   -0.18    1.37
  -4  -2  -4    2.43    1.30
   4   2   4    4.06    2.79
   4   2   4    1.28    1.15
  -4   2  -4    0.91    1.35
  -5  -2  -4    6.73    1.52
   5  -2   4    4.58    1.74
   5  -2   4    8.90    3.25
  -5   2  -4    5.49    1.68
   5   2   4   10.59    3.25
   5   2   4    4.64    1.47
  -6  -2  -4    5.77    1.45
   6  -2   4    5.60    1.74
   6  -2   4    4.01    2.81
   6   2   4    4.12    2.85
   6   2   4    2.57    1.49
  -6   2  -4    3.68    1.52
   7  -2   4   -4.16    2.70
   7  -2   4   -1.89    1.58
   7   2   4   -0.78    1.40
   7   2   4   -1.82    2.64
  -7   2  -4    0.52    1.53
   8  -2   4   -1.22    1.57
   8  -2   4   -5.94    2.89
   8   2   4   -4.04    2.56
   8   2   4    1.40    1.76
   9  -2   4   -1.07    1.93
   9   2   4   -5.86    2.91
  12  -3  -4    2.54    2.26
  12   3  -4    1.51    2.21
  11  -3  -4   -0.32    1.96
  11   3  -4    3.63    2.13
  10  -3  -4    4.92    2.23
  10   3  -4    2.64    1.79
   9  -3  -4    3.75    1.98
  -9   3   4    4.34    2.06
   9   3  -4    4.99    1.95
   8  -3  -4   14.10    2.32
  -8  -3   4   17.32    2.15
   8   3  -4   17.76    2.46
  -8   3   4   20.59    2.58
  -7  -3   4   10.66    2.05
   7  -3  -4    9.39    1.92
   7   3  -4    7.21    1.81
  -7   3   4    6.15    2.22
   7   3  -4    7.42    1.41
   6  -3  -4   -0.39    0.64
   6  -3  -4    1.13    1.33
  -6  -3   4    0.45    1.51
  -6   3   4    0.34    1.78
   6   3  -4    0.80    0.98
   6   3  -4    2.89    1.32
  -5  -3   4    1.88    1.26
   5  -3  -4    0.67    1.21
   5   3  -4    1.05    1.19
  -5   3   4    1.17    1.56
   5   3  -4    1.86    0.95
   4  -3  -4   67.55    3.07
  -4  -3   4   65.98    2.81
   4   3  -4   73.60    3.16
  -4   3   4   67.83    3.14
   4   3  -4   66.53    2.76
   3  -3  -4   47.04    2.23
   3   3  -4   49.69    2.28
   3   3  -4   48.23    2.36
   3   3  -4   48.08    2.37
  -3   3   4   49.33    2.37
   2  -3  -4   40.08    1.73
   2  -3  -4   39.85    2.07
  -2   3   4   39.26    2.12
   2   3  -4   41.42    1.90
   2   3  -4   43.33    2.16
   2   3  -4   40.05    2.17
   1  -3  -4   61.28    1.67
   1  -3  -4   62.14    2.48
  -1   3   4   66.35    3.08
   1   3  -4   59.07    2.53
   0  -3  -4   49.04    2.33
   0   3  -4   49.14    2.43
   0   3   4   52.09    3.23
  -1  -3  -4   11.81    1.36
   1   3   4   11.75    0.73
   1   3   4   10.35    2.09
  -1   3  -4   11.09    1.45
   2  -3   4  117.08    3.83
  -2  -3  -4  116.21    3.69
   2   3   4  111.96    4.95
   2   3   4  114.39    3.19
  -2   3  -4  117.27    3.81
   3  -3   4   41.84    2.73
   3  -3   4   36.90    3.29
  -3  -3  -4   42.30    2.28
   3   3   4   42.66    3.94
   3   3   4   37.64    2.11
  -3   3  -4   43.33    2.73
  -4  -3  -4   28.01    2.28
   4  -3   4   24.22    2.24
   4  -3   4   27.76    3.44
   4   3   4   29.52    3.62
   4   3   4   29.03    2.37
  -4   3  -4   27.29    2.36
   5  -3   4   39.70    3.35
  -5  -3  -4   40.59    2.57
   5  -3   4   36.70    4.04
   5   3   4   42.55    2.88
   5   3   4   32.97    4.03
  -5   3  -4   34.76    2.81
   6  -3   4    7.67    1.88
  -6  -3  -4    4.84    1.41
   6  -3   4    5.47    2.89
   6   3   4    4.06    2.79
  -6   3  -4    4.69    1.67
   6   3   4    7.15    1.64
   7  -3   4    2.57    1.87
   7  -3   4    1.19    3.13
   7   3   4    2.03    1.63
   7   3   4    2.59    2.79
  -7   3  -4    6.28    1.85
   8  -3   4    4.99    2.11
   8  -3   4   -3.11    3.09
   8   3   4    7.18    3.09
   8   3   4    6.75    2.00
   9  -3   4   -2.57    1.82
   9   3   4   -5.01    2.64
  12  -4  -4    2.05    2.18
  12   4  -4    2.28    2.31
  11  -4  -4    9.76    2.75
  11   4  -4    9.17    2.57
  10  -4  -4   35.84    3.66
  10   4  -4   34.37    3.61
   9  -4  -4   22.56    2.80
   9   4  -4   22.48    2.93
  -9   4   4   27.07    3.01
   8  -4  -4    1.12    1.55
   8   4  -4    0.69    1.12
   8   4  -4   -0.52    1.51
  -8   4   4    3.19    2.06
  -7  -4   4   53.12    3.28
   7  -4  -4   60.73    4.06
   7   4  -4   53.24    3.91
  -7   4   4   58.08    3.85
   7   4  -4   54.04    2.90
   6  -4  -4   15.64    2.20
  -6  -4   4   20.06    1.92
  -6   4   4   17.06    2.39
   6   4  -4   16.97    1.70
   6   4  -4   14.43    2.05
  -5  -4   4   11.05    1.46
   5  -4  -4   10.25    1.66
   5   4  -4    7.28    1.30
   5   4  -4    7.35    1.51
  -5   4   4   10.75    1.91
  -4  -4   4   94.26    3.20
   4  -4  -4   94.30    3.60
   4   4  -4   98.73    3.48
   4   4  -4   92.96    3.07
   4   4  -4   99.76    3.62
  -4   4   4   91.16    3.66
   3  -4  -4   33.51    2.12
   3   4  -4   34.11    2.05
   3   4  -4   34.23    2.06
  -3   4   4   34.09    2.19
   3   4  -4   34.98    2.03
   2  -4  -4   26.67    1.55
   2   4  -4   25.85    1.67
  -2   4   4   27.79    2.22
   2   4  -4   24.79    1.65
   2   4  -4   26.47    1.96
  -2   4   4   26.84    1.89
   1  -4  -4   62.03    2.64
   1  -4  -4   59.25    1.70
   1   4  -4   59.35    2.67
  -1   4   4   55.61    3.01
   1   4  -4   59.83    2.51
   0  -4  -4    4.17    1.10
   0   4  -4    4.01    1.04
   0   4   4    3.27    1.63
  -1  -4  -4   22.77    1.80
   1   4   4   19.95    2.41
  -1   4  -4   20.95    1.83
   1   4   4   21.51    0.94
  -2  -4  -4   12.03    1.38
   2  -4   4   11.30    1.59
  -2   4  -4   12.04    1.56
   2   4   4   13.67    1.20
   2   4   4   15.42    2.50
   3  -4   4   12.26    1.74
   3  -4   4   12.58    2.66
  -3  -4  -4   12.41    1.49
   3   4   4   12.21    2.73
  -3   4  -4   12.12    1.75
   3   4   4   11.31    1.22
   4  -4   4    4.45    1.65
  -4  -4  -4    5.10    1.36
   4  -4   4    6.73    2.77
   4   4   4    6.62    2.91
   4   4   4    4.22    1.19
  -4   4  -4    5.26    1.58
  -5  -4  -4   -2.34    1.10
   5  -4   4    1.79    2.91
   5  -4   4   -0.60    1.68
  -5   4  -4   -0.39    1.42
   5   4   4    2.58    2.96
   5   4   4   -2.06    1.13
   6  -4   4    1.73    2.74
   6  -4   4   -2.34    1.57
  -6  -4  -4   -0.74    1.04
   6   4   4    0.22    1.32
  -6   4  -4   -0.69    1.33
   6   4   4   -2.59    2.53
   7  -4   4   -3.70    2.76
   7  -4   4    1.06    1.84
  -7   4  -4   -0.40    1.52
   7   4   4   -0.85    1.45
   7   4   4   -3.27    2.39
   8  -4   4   20.93    3.77
   8  -4   4   23.39    3.01
   8   4   4   23.54    2.78
   8   4   4   21.52    3.64
   9  -4   4    9.96    2.67
   9   4   4    7.65    3.46
  12  -5  -4   -0.31    2.10
  12   5  -4    0.29    2.15
  11  -5  -4   -0.26    2.16
  11   5  -4    0.56    1.96
  10  -5  -4    3.26    1.93
  10   5  -4   -0.63    1.75
 -10   5   4   -2.51    2.08
   9  -5  -4   -1.05    1.75
  -9   5   4   -1.66    1.97
   9   5  -4    0.99    1.78
   8  -5  -4    1.24    1.55
   8   5  -4    0.39    1.15
  -8   5   4    1.68    2.07
   8   5  -4    1.02    1.62
  -7  -5   4    6.02    1.73
   7  -5  -4    2.24    1.84
   7   5  -4    2.59    1.68
  -7   5   4    5.35    2.46
   7   5  -4    2.21    1.25
  -6  -5   4    0.36    1.47
   6  -5  -4    0.58    1.53
   6   5  -4    2.75    1.19
   6   5  -4    3.28    1.54
  -6   5   4    1.63    2.03
  -5  -5   4    7.41    1.35
   5  -5  -4    7.29    1.59
   5   5  -4    5.95    1.49
   5   5  -4    8.12    1.34
  -5   5   4    4.79    1.82
   4  -5  -4    2.25    1.16
   4   5  -4    2.44    1.10
  -4   5   4    3.30    0.89
  -4   5   4    2.08    1.39
   4   5  -4    3.45    1.05
   4   5  -4    2.76    1.05
   3  -5  -4   13.37    1.39
   3   5  -4   14.85    1.54
  -3   5   4   19.72    1.90
   3   5  -4   16.44    1.53
   3   5  -4   18.89    1.51
  -3   5   4   16.01    1.69
   2  -5  -4    0.13    0.74
   2   5  -4    0.56    0.78
  -2   5   4   -0.09    1.01
   2   5  -4   -0.52    0.81
   2   5  -4    0.03    0.91
  -2   5   4    1.56    1.18
   1  -5  -4   30.39    2.06
   1  -5  -4   27.26    1.33
  -1   5   4   30.72    2.90
   1   5  -4   30.71    2.02
   1   5  -4   27.88    1.99
   0  -5  -4   16.21    1.50
   0   5   4   13.90    1.98
   0   5  -4   13.34    1.42
  -1  -5  -4   36.71    2.20
   1   5   4   37.21    3.17
  -1   5  -4   38.49    2.42
  -2  -5  -4   37.40    2.22
   2   5   4   43.15    1.76
  -2   5  -4   43.49    2.67
   2   5   4   43.90    3.66
   3  -5   4    9.79    1.75
  -3  -5  -4    7.84    1.32
   3   5   4   10.38    2.68
   3   5   4    7.34    1.12
  -3   5  -4    9.68    1.72
  -4  -5  -4   20.88    1.77
   4  -5   4   17.73    3.05
   4  -5   4   18.60    2.20
   4   5   4   27.37    3.56
  -4   5  -4   22.11    2.28
   4   5   4   17.20    1.66
   5  -5   4    0.39    1.78
  -5  -5  -4    1.15    1.14
   5  -5   4    1.43    2.93
   5   5   4   -1.58    1.18
   5   5   4    0.38    2.50
  -5   5  -4    1.01    1.53
   6  -5   4   21.71    2.58
   6  -5   4   19.83    3.58
   6   5   4   20.21    3.39
   6   5   4   21.75    2.26
  -6   5  -4   22.71    2.44
   7  -5   4   -1.88    2.80
   7  -5   4   -2.56    1.64
   7   5   4    1.93    2.74
   7   5   4    1.16    1.47
  -7   5  -4    1.55    1.67
   8  -5   4   -3.78    2.83
   8  -5   4   -1.39    1.77
   8   5   4    0.02    1.54
  -8   5  -4   -0.97    1.66
   8   5   4   -2.47    2.53
   9  -5   4   -0.36    2.07
   9   5   4   -1.92    2.85
  12  -6  -4   14.02    3.08
  12   6  -4   14.85    3.14
  11  -6  -4    2.02    2.24
  11   6  -4   -0.17    1.91
  10  -6  -4   16.76    2.88
  10   6  -4   18.55    2.92
 -10   6   4   17.56    2.93
   9  -6  -4   17.52    2.67
  -9   6   4   14.96    2.77
   9   6  -4   14.77    2.54
   8  -6  -4   -0.38    1.53
  -8   6   4    0.11    1.96
   8   6  -4    2.00    1.67
   8   6  -4    1.12    1.20
  -7  -6   4    4.07    1.68
   7  -6  -4    3.76    1.76
   7   6  -4    4.34    1.42
   7   6  -4    5.03    1.79
  -7   6   4    6.67    2.41
   6  -6  -4    6.53    1.71
  -6  -6   4    6.32    1.56
  -6   6   4    5.42    2.19
   6   6  -4    6.00    1.55
   6   6  -4    6.08    1.42
   5  -6  -4   22.67    2.19
  -5  -6   4   22.52    1.94
  -5   6   4   23.50    2.43
   5   6  -4   17.58    2.00
   5   6  -4   21.92    2.09
   4  -6  -4   74.97    3.30
   4   6  -4   79.99    2.83
   4   6  -4   78.01    3.20
  -4   6   4   78.82    3.54
   4   6  -4   72.14    3.29
  -4   6   4   68.07    2.35
   3  -6  -4   10.56    1.36
  -3   6   4   11.70    1.35
   3   6  -4    9.92    1.40
   3   6  -4   10.42    1.34
   3   6  -4   13.47    1.31
  -3   6   4   13.82    1.76
   2  -6  -4    2.04    0.89
   2   6  -4    2.07    0.86
  -2   6   4    2.49    1.16
  -2   6   4    2.15    1.26
   2   6  -4    1.11    0.88
   2   6  -4    1.10    1.02
   1  -6  -4   77.79    2.39
  -1   6   4   79.49    3.54
   1   6  -4   81.15    3.01
  -1   6   4   84.76    3.09
   1   6  -4   81.51    3.25
   0  -6  -4   10.37    1.37
   0   6  -4    7.87    1.35
   0   6   4    7.01    1.81
  -1  -6  -4   57.11    2.51
   1   6   4   64.40    4.12
  -1   6  -4   60.21    2.94
  -2  -6  -4    9.37    1.26
   2   6   4    9.74    2.38
   2   6   4    9.26    0.95
  -2   6  -4    9.41    1.51
   3  -6   4    2.08    1.71
  -3  -6  -4    1.90    1.08
  -3   6  -4   -1.17    1.36
   3   6   4   -0.73    0.82
   3   6   4    2.30    2.52
   4  -6   4    5.18    1.95
  -4  -6  -4    1.14    1.11
   4  -6   4    3.62    2.69
  -4   6  -4    1.68    1.58
   4   6   4    1.22    1.09
   4   6   4    1.77    2.72
  -5  -6  -4    7.71    1.43
   5  -6   4   12.67    3.17
   5  -6   4    8.57    2.06
  -5   6  -4    6.87    1.88
   5   6   4    7.71    1.52
   5   6   4    4.71    2.90
   6  -6   4   31.30    4.00
   6  -6   4   40.56    3.58
   6   6   4   33.90    2.78
   6   6   4   31.77    3.75
  -6   6  -4   37.68    2.95
   7  -6   4    3.04    2.09
   7  -6   4   -1.92    3.02
  -7   6  -4    0.61    1.69
   7   6   4    4.45    1.60
   7   6   4    3.02    2.81
   8  -6   4    1.23    3.29
   8  -6   4    3.48    2.15
   8   6   4    2.82    2.75
   8   6   4    7.35    1.91
  -8   6  -4    4.92    1.93
   9  -6   4    8.96    2.59
   9   6   4    2.63    3.29
  10  -6   4    1.16    2.36
  10   6   4   -3.81    2.74
  12  -7  -4    1.12    2.20
  12   7  -4   -3.72    1.91
  11  -7  -4    1.17    2.20
  11   7  -4    0.65    1.99
  10  -7  -4   -0.04    2.03
  10   7  -4   -0.61    1.73
 -10   7   4    0.19    2.27
   9  -7  -4    0.03    1.94
  -9   7   4   -1.82    2.01
   9   7  -4    1.54    1.74
   8  -7  -4    0.84    1.87
   8   7  -4   -0.23    1.52
  -8   7   4    4.28    2.13
   8   7  -4    1.06    1.27
  -7  -7   4    5.14    1.61
   7  -7  -4    4.63    2.00
  -7   7   4    5.14    2.46
   7   7  -4    5.00    1.75
   7   7  -4    6.09    1.50
   6  -7  -4   10.94    1.94
  -6  -7   4   10.12    1.61
   6   7  -4   11.69    1.70
  -6   7   4   12.17    2.49
   6   7  -4    9.69    1.91
  -5  -7   4   -0.26    1.06
   5  -7  -4    3.24    1.54
  -5   7   4    1.09    1.71
   5   7  -4    0.26    1.13
   5   7  -4   -0.22    1.12
   4  -7  -4   47.69    2.91
   4   7  -4   46.29    2.76
  -4   7   4   45.65    2.84
   4   7  -4   49.46    2.27
   4   7  -4   47.76    2.63
   3  -7  -4   28.86    2.10
   3   7  -4   28.72    2.07
   3   7  -4   28.47    2.17
   3   7  -4   29.48    1.98
  -3   7   4   25.25    2.11
  -3   7   4   29.33    2.18
   2  -7  -4    1.76    0.93
   2   7  -4   -0.42    0.87
  -2   7   4   -0.50    1.22
   2   7  -4    0.31    1.01
  -2   7   4   -0.75    1.20
   1   7  -4   58.41    2.93
   1   7  -4   54.45    2.56
  -1   7   4   58.88    3.42
  -1   7   4   57.04    2.56
   0  -7  -4   32.60    2.14
   0   7   4   41.29    3.35
   0   7  -4   35.61    2.33
  -1  -7  -4    6.21    1.19
   1   7   4    5.20    1.83
  -1   7  -4    6.73    1.32
  -2  -7  -4  110.67    3.58
  -2   7  -4  111.87    4.10
   2   7   4  110.58    3.23
   2   7   4  108.43    5.34
  -3  -7  -4   39.91    2.21
   3  -7   4   30.40    2.71
   3   7   4   33.59    3.30
   3   7   4   34.78    2.02
  -3   7  -4   43.79    3.03
  -4  -7  -4   20.99    1.78
   4  -7   4   22.36    2.49
   4  -7   4   18.61    3.18
  -4   7  -4   17.14    2.26
   4   7   4   14.76    3.00
   4   7   4   18.79    1.76
   5  -7   4   58.52    5.24
  -5  -7  -4   61.63    2.72
   5  -7   4   66.38    4.13
  -5   7  -4   58.12    3.52
   5   7   4   54.49    5.13
   5   7   4   58.62    3.09
   6  -7   4   20.56    3.50
   6  -7   4   26.01    2.89
   6   7   4   30.20    2.58
   6   7   4   26.19    3.58
  -6   7  -4   27.48    2.72
   7  -7   4    0.28    3.11
   7  -7   4    0.75    1.97
  -7   7  -4    1.30    1.66
   7   7   4    0.62    2.65
   7   7   4    0.91    1.41
   8  -7   4    4.18    3.47
   8  -7   4   13.23    2.75
   8   7   4    9.33    2.05
  -8   7  -4   10.58    2.31
   8   7   4    8.99    3.28
   9  -7   4   -2.12    2.10
   9   7   4   -0.54    2.74
  10  -7   4    1.74    2.43
  10   7   4   -3.73    2.74
  12  -8  -4   -0.78    2.17
  12   8  -4    0.50    2.20
  11  -8  -4    0.39    2.16
  11   8  -4    1.97    2.08
  10  -8  -4    0.69    2.06
  10   8  -4    2.68    2.05
 -10   8   4   -3.47    2.09
   9  -8  -4    7.19    2.38
   9   8  -4    6.97    2.17
  -9   8   4    3.77    2.35
   8  -8  -4    7.07    2.24
   8   8  -4    8.15    2.04
   8   8  -4    9.24    1.73
  -8   8   4    5.27    2.27
   7  -8  -4   37.14    3.30
  -7   8   4   49.66    3.96
   7   8  -4   44.94    2.97
   7   8  -4   46.63    3.60
   6  -8  -4   11.59    2.17
  -6  -8   4    9.80    1.48
   6   8  -4    8.94    1.78
  -6   8   4    7.97    2.44
   6   8  -4    8.23    1.64
   5  -8  -4   42.13    3.28
  -5  -8   4   33.62    2.21
   5   8  -4   35.34    2.64
  -5   8   4   37.25    2.99
   5   8  -4   35.19    2.83
   4  -8  -4   28.40    2.63
  -4   8   4   31.25    2.64
   4   8  -4   28.87    1.90
   4   8  -4   29.60    2.30
   4   8  -4   34.18    2.52
   3  -8  -4    2.65    1.27
  -3   8   4    3.12    1.54
   3   8  -4    0.75    0.87
   3   8  -4    1.30    1.05
  -3   8   4    2.48    1.06
   3   8  -4   -0.07    0.87
   2  -8  -4    0.07    1.02
  -2   8   4    0.20    1.25
  -2   8   4    1.28    1.23
   2   8  -4    1.17    1.06
   2   8  -4    0.65    0.91
  -1   8   4   24.11    1.93
  -1   8   4   20.60    2.02
   1   8  -4   20.82    1.75
   1   8  -4   18.42    1.80
   0   8   4   76.03    4.02
   0   8   4   72.45    2.95
   0   8  -4   67.28    3.19
   0   8  -4   73.27    2.97
  -1  -8  -4   25.93    1.88
   1   8   4   24.00    2.47
  -1   8  -4   24.23    2.04
  -2  -8  -4   43.41    2.31
  -2   8  -4   46.85    2.74
   2   8   4   43.98    2.03
   2   8   4   47.63    4.21
   3  -8   4    8.60    2.05
  -3  -8  -4   10.67    1.44
   3   8   4   11.42    2.80
   3   8   4    9.06    1.23
  -3   8  -4    7.71    1.82
   4  -8   4   23.45    3.40
  -4  -8  -4   28.40    2.01
   4  -8   4   26.38    2.84
   4   8   4   29.16    3.55
   4   8   4   28.74    2.23
  -4   8  -4   32.91    2.72
   5  -8   4    5.16    2.80
   5  -8   4    1.92    1.90
  -5  -8  -4    1.09    1.03
   5   8   4    2.09    2.59
  -5   8  -4    1.11    1.67
   5   8   4    5.33    1.41
   6  -8   4   11.65    2.34
   6  -8   4   12.17    3.28
   6   8   4   11.17    1.77
  -6   8  -4   13.39    2.20
   6   8   4   10.48    3.00
   7  -8   4    0.03    3.11
   7  -8   4    1.40    2.13
   7   8   4    4.46    1.64
  -7   8  -4    3.26    1.80
   7   8   4    1.58    2.53
   8  -8   4    0.38    2.17
  -8   8  -4   -1.11    1.82
   8   8   4   -0.41    2.81
   9  -8   4   -2.09    2.02
   9   8   4   -4.48    2.53
  10  -8   4    0.73    2.41
  10   8   4    2.97    3.17
  12  -9  -4    1.55    2.34
  12   9  -4    1.93    2.19
  11  -9  -4   15.00    3.11
  11   9  -4   11.02    2.75
  10  -9  -4    3.79    2.29
  10   9  -4    3.24    2.04
 -10   9   4   -0.16    2.34
   9  -9  -4   -1.93    1.67
  -9   9   4   -3.73    2.07
   9   9  -4    0.09    1.37
   9   9  -4   -0.21    1.55
   8  -9  -4    6.54    2.04
   8   9  -4    6.76    2.01
   8   9  -4    4.50    1.60
  -8   9   4    2.93    2.36
   7  -9  -4   -0.29    1.83
   7   9  -4   -0.21    1.23
  -7   9   4    2.13    2.34
   7   9  -4    0.69    1.42
  -6  -9   4   53.03    2.58
   6  -9  -4   57.73    4.10
  -6   9   4   46.84    4.03
   6   9  -4   54.48    3.25
   6   9  -4   52.07    3.59
   5  -9  -4   40.00    3.42
  -5  -9   4   32.80    2.13
   5   9  -4   36.43    2.67
   5   9  -4   31.61    2.00
   5   9  -4   33.10    2.90
  -5   9   4   37.33    3.10
   4  -9  -4   55.76    3.25
   4   9  -4   53.07    2.36
   4   9  -4   53.26    2.95
  -4   9   4   51.49    3.15
   4   9  -4   56.25    3.08
   3  -9  -4   66.01    3.27
  -3   9   4   64.70    3.38
   3   9  -4   65.79    3.08
   3   9  -4   63.19    2.59
   3   9  -4   62.92    3.16
  -3   9   4   61.39    2.57
   2  -9  -4    5.88    1.31
   2   9  -4    6.83    1.21
  -2   9   4    6.50    1.49
  -2   9   4    5.79    1.34
   2   9  -4    4.23    1.20
  -1   9   4   -0.68    1.23
   1   9  -4   -1.05    1.09
   1   9  -4    1.25    1.06
  -1   9   4    2.18    1.54
   0   9  -4   42.34    2.77
   0   9  -4   43.52    2.39
   0   9   4   41.68    2.44
   0   9   4   44.55    3.37
  -1  -9  -4   28.99    1.94
   1   9   4   22.25    2.43
  -1   9  -4   27.70    2.15
   1   9   4   27.91    2.27
  -2  -9  -4   41.03    2.26
   2   9   4   33.40    3.24
  -2   9  -4   44.51    2.75
  -3  -9  -4    2.02    1.11
   3   9   4   -0.11    0.94
   3   9   4    3.21    2.49
  -3   9  -4    3.66    1.65
   4  -9   4    2.19    2.07
  -4  -9  -4    1.71    1.13
   4   9   4    1.84    1.17
  -4   9  -4    0.28    1.73
   4   9   4    1.63    2.59
   5  -9   4    7.81    2.80
   5  -9   4    1.64    2.09
  -5   9  -4    4.26    1.80
   5   9   4    3.58    1.27
   5   9   4    1.82    2.54
   6  -9   4    0.85    2.07
   6  -9   4   -3.23    2.59
   6   9   4    0.57    1.26
  -6   9  -4    1.23    1.68
   6   9   4    1.00    2.48
   7  -9   4   -2.98    3.01
   7  -9   4    1.08    2.21
   7   9   4    3.40    1.57
   7   9   4   -0.01    2.53
  -7   9  -4    2.36    1.85
   8  -9   4    1.46    2.17
  -8   9  -4    4.12    1.98
   8   9   4   -1.59    2.58
   9  -9   4   -0.11    2.29
   9   9   4   -2.82    2.69
  10  -9   4    4.45    2.71
  10   9   4    4.89    3.37
  12 -10  -4   12.26    3.07
  12  10  -4   15.73    3.24
  11 -10  -4   -0.58    2.21
 -11  10   4   -1.22    2.28
  11  10  -4    2.69    2.26
  10 -10  -4   24.61    3.30
 -10  10   4   30.41    3.48
  10  10  -4   31.67    3.61
   9 -10  -4    1.42    1.95
   9  10  -4    1.16    1.63
   9  10  -4    1.96    1.56
  -9  10   4    5.11    2.49
   8 -10  -4   13.84    2.59
  -8  10   4   11.63    2.62
   8  10  -4   12.83    2.02
   8  10  -4   12.29    2.22
   7 -10  -4   54.86    4.37
   7  10  -4   64.64    3.59
  -7  10   4   55.68    4.12
   7  10  -4   59.89    4.00
  -6 -10   4   17.31    1.62
   6 -10  -4   17.90    2.57
  -6  10   4   16.45    2.89
   6  10  -4   13.78    1.95
   6  10  -4   15.55    2.27
   5 -10  -4   56.38    3.82
   5  10  -4   49.87    3.21
  -5  10   4   55.52    4.00
   5  10  -4   49.54    2.36
   5  10  -4   52.46    3.12
   4 -10  -4    6.91    1.81
  -4  10   4    5.73    1.90
   4  10  -4    5.55    1.14
   4  10  -4    7.95    1.53
   4  10  -4    6.42    1.49
   3 -10  -4   -1.67    1.33
  -3  10   4   -1.39    1.41
   3  10  -4    0.21    1.07
   3  10  -4    0.32    1.14
   3  10  -4    0.14    0.90
  -3  10   4   -1.07    0.89
  -2  10   4    6.44    1.35
  -2  10   4    4.85    1.48
   2  10  -4    6.99    1.19
   2  10  -4    6.99    1.36
  -1  10   4   11.15    1.67
  -1  10   4   12.02    1.71
   1  10  -4    9.05    1.38
   1  10  -4    8.97    1.48
   0  10  -4   32.42    2.62
   0  10   4   28.38    2.27
   0  10   4   34.60    3.20
   0  10  -4   36.19    2.45
   1  10   4   13.56    2.29
   1  10   4   17.55    1.72
  -1  10  -4   16.95    1.84
  -2 -10  -4   -0.16    1.04
   2  10   4    1.14    1.24
  -2  10  -4    2.45    1.54
   2  10   4    1.20    2.14
  -3 -10  -4    4.56    1.21
   3  10   4    3.73    2.46
  -3  10  -4    1.82    1.68
   3  10   4    2.08    1.08
   4 -10   4    1.51    2.35
  -4 -10  -4    0.78    1.09
   4  10   4    0.42    1.11
   4  10   4    0.40    2.61
  -4  10  -4    2.22    1.81
   5 -10   4    1.47    2.01
   5 -10   4    0.88    2.64
   5  10   4    0.02    1.15
   5  10   4    4.72    2.53
  -5  10  -4    2.55    1.74
   6 -10   4   10.37    2.53
   6 -10   4   16.50    3.38
   6  10   4   11.92    1.84
   6  10   4   11.91    3.05
  -6  10  -4   13.94    2.36
   7 -10   4    0.49    3.05
   7 -10   4   -2.23    1.96
  -7  10  -4   -0.84    1.69
   7  10   4    0.88    1.42
   7  10   4   -1.31    2.43
   8 -10   4   13.38    2.90
  -8  10  -4   17.33    2.67
   8  10   4   14.00    3.34
   9 -10   4    7.42    2.71
  -9  10  -4    7.07    2.32
   9  10   4    1.09    2.73
  12 -11  -4    2.76    2.52
  12  11  -4    2.85    2.39
  11 -11  -4   -2.06    2.17
  11  11  -4   -0.24    2.07
 -11  11   4   -3.45    2.32
  10 -11  -4    2.35    2.32
  10  11  -4    2.62    2.06
 -10  11   4    1.96    2.56
   9 -11  -4    1.24    2.00
   9  11  -4    3.89    1.87
   9  11  -4    6.12    1.86
  -9  11   4    3.68    2.51
   8 -11  -4    1.20    1.99
   8  11  -4    1.72    1.72
  -8  11   4    1.71    2.22
   8  11  -4    1.61    1.49
   7 -11  -4    7.29    2.24
   7  11  -4    9.37    1.81
  -7  11   4    4.72    2.43
   7  11  -4   10.61    2.17
   6 -11  -4    2.81    2.09
  -6 -11   4    2.13    1.21
   6  11  -4    1.49    1.52
  -6  11   4    4.12    2.58
   6  11  -4    5.91    1.84
   5 -11  -4    3.25    1.89
   5  11  -4    7.54    1.19
   5  11  -4    5.54    1.62
  -5  11   4    3.97    2.15
   5  11  -4    3.50    1.57
   4 -11  -4    0.91    1.64
   4  11  -4    1.97    1.32
   4  11  -4   -0.33    0.89
   4  11  -4    0.89    1.32
  -4  11   4    0.83    1.73
   3 -11  -4   17.82    2.00
   3  11  -4   18.06    1.99
   3  11  -4   16.92    1.55
  -3  11   4   16.61    1.35
  -3  11   4   18.08    2.27
   2  11  -4   74.20    3.53
  -2  11   4   68.75    3.13
   2  11  -4   72.33    2.87
  -2  11   4   65.33    3.44
  -1  11   4   99.36    4.15
   1  11  -4   95.60    3.58
  -1  11   4   96.37    3.74
   1  11  -4  100.50    4.02
   0  11   4  109.09    4.63
   0  11  -4  115.51    4.03
   0  11   4  109.50    3.76
   0  11  -4  115.76    4.47
  -1  11  -4   19.32    1.98
   1  11   4   20.18    2.47
   1  11   4   19.35    1.79
  -2  11  -4  106.70    4.19
   2  11   4  106.16    5.03
   2  11   4  106.36    3.65
  -3 -11  -4   42.29    2.32
   3  11   4   38.04    3.66
   3  11   4   42.10    2.46
  -3  11  -4   45.02    3.35
   3  11   4   43.71    2.59
  -4 -11  -4    3.88    1.24
   4 -11   4    5.18    2.57
  -4  11  -4    2.24    1.84
   4  11   4    4.69    2.40
   4  11   4    4.30    1.26
   5 -11   4   10.20    2.54
   5 -11   4   13.12    2.84
  -5  11  -4   11.89    2.10
   5  11   4   17.59    3.06
   5  11   4   11.14    1.66
   6 -11   4    1.71    2.87
   6 -11   4   -0.18    2.07
  -6  11  -4    0.53    1.61
   6  11   4   -0.08    2.26
   6  11   4    2.20    1.37
   7 -11   4    0.19    3.05
   7 -11   4   -0.14    2.22
   7  11   4    0.02    1.37
   7  11   4   -1.21    2.49
  -7  11  -4   -0.75    1.91
   8 -11   4    5.32    2.64
  -8  11  -4    0.01    2.11
   8  11   4    8.17    3.04
   9 -11   4    1.83    2.50
  -9  11  -4    4.53    2.40
   9  11   4    2.21    2.86
  12 -12  -4    7.81    2.90
  12  12  -4   10.09    2.91
  11 -12  -4    1.18    2.27
  11  12  -4    1.68    2.12
 -11  12   4   -2.59    2.57
  10 -12  -4   -1.21    2.19
  10  12  -4    1.25    2.01
 -10  12   4   -1.48    2.42
   9 -12  -4   -0.36    2.10
   9  12  -4   -0.76    1.52
   9  12  -4    0.08    1.54
  -9  12   4    0.87    2.45
   8 -12  -4    4.24    2.29
   8  12  -4    4.78    1.73
  -8  12   4    5.49    2.44
   8  12  -4    1.25    1.73
   7 -12  -4    1.09    1.98
   7  12  -4    0.31    1.42
  -7  12   4    3.45    2.36
   7  12  -4    1.53    1.45
   6 -12  -4    4.34    2.22
   6  12  -4    4.34    1.63
  -6  12   4    8.75    2.56
   6  12  -4    1.62    1.68
   5 -12  -4   31.92    2.97
  -5  12   4   40.86    3.55
   5  12  -4   40.41    2.17
   5  12  -4   41.37    3.19
   5  12  -4   39.61    2.99
   4 -12  -4    1.92    1.84
  -4  12   4    0.03    0.57
  -4  12   4   -0.48    2.04
   4  12  -4    0.69    1.33
   4  12  -4    1.03    1.00
   4  12  -4    0.38    1.29
   3 -12  -4  165.26    5.61
   3  12  -4  157.34    4.47
  -3  12   4  161.51    5.41
  -3  12   4  156.63    4.45
   3  12  -4  159.11    5.58
   2  12  -4   64.08    2.73
  -2  12   4   57.19    3.16
   2  12  -4   60.16    3.37
  -2  12   4   63.75    3.02
  -1  12   4    3.19    1.56
   1  12  -4    4.54    1.21
  -1  12   4    3.77    1.58
   1  12  -4    2.50    1.33
   0  12   4   24.02    2.37
   0  12  -4   24.73    2.16
   0  12  -4   23.40    2.28
   0  12   4   30.74    2.43
  -1  12  -4   47.34    2.84
  -1  12  -4   44.52    3.15
   1  12   4   44.75    2.76
   1  12   4   51.85    3.59
  -2  12  -4    3.26    1.59
   2  12   4    5.97    2.33
   2  12   4    3.74    1.40
   3  12   4    3.92    2.43
   3  12   4    3.30    1.43
  -3  12  -4    1.31    1.75
   4 -12   4    5.53    2.49
  -4  12  -4    2.66    1.88
   4  12   4    1.80    2.28
   4  12   4    2.02    1.27
   4  12   4    2.75    1.38
   5 -12   4   -0.06    2.42
   5 -12   4   -1.41    1.99
   5  12   4    1.21    2.15
  -5  12  -4   -1.27    1.65
   5  12   4   -1.29    1.07
   6 -12   4    1.25    2.68
   6 -12   4    1.70    2.17
   6  12   4    7.33    2.81
  -6  12  -4    4.97    2.07
   6  12   4    4.25    1.51
   7 -12   4    6.69    2.53
   7 -12   4    3.97    3.22
   7  12   4    6.36    1.77
   7  12   4    3.17    2.69
  -7  12  -4    6.06    2.18
   8 -12   4    2.15    2.53
   8  12   4   -0.13    2.51
  -8  12  -4    2.30    2.14
   9 -12   4   -3.39    2.27
  -9  12  -4   -2.39    2.01
   9  12   4    0.56    2.74
  11 -13  -4    8.37    3.00
  11  13  -4   10.68    2.89
 -11  13   4    4.10    2.74
  10 -13  -4    5.84    2.69
 -10  13   4    9.11    2.92
  10  13  -4    6.14    2.36
   9 -13  -4    0.43    2.22
   9  13  -4    3.81    1.80
  -9  13   4    5.52    2.61
   9  13  -4    4.64    1.95
   8 -13  -4   12.04    2.70
  -8  13   4   13.52    2.85
   8  13  -4   11.39    2.29
   8  13  -4   12.58    2.19
   7 -13  -4    0.58    2.01
   7  13  -4    0.46    1.62
   7  13  -4    1.91    1.57
  -7  13   4    0.63    2.25
   6 -13  -4   74.52    4.80
   6  13  -4   72.39    3.98
  -6  13   4   70.21    4.74
   6  13  -4   76.20    4.14
   5 -13  -4   13.35    2.44
  -5  13   4   14.91    2.61
   5  13  -4   13.74    2.17
   5  13  -4   12.00    2.02
   5  13  -4   13.68    1.38
   4 -13  -4    0.11    1.86
   4  13  -4   -0.16    0.92
  -4  13   4    0.18    0.63
   4  13  -4   -1.72    1.27
   4  13  -4    1.02    1.41
  -4  13   4   -1.78    2.05
   3  13  -4   15.38    2.00
   3  13  -4   17.48    1.61
  -3  13   4   19.06    2.46
  -3  13   4   14.29    1.38
   2  13  -4   18.72    1.73
  -2  13   4   16.25    1.72
  -2  13   4   20.98    2.20
   2  13  -4   17.35    2.06
  -1  13   4    5.77    1.76
   1  13  -4    8.41    1.38
   1  13  -4    5.79    1.48
  -1  13   4    7.00    1.65
   0  13   4   69.27    3.91
   0  13   4   68.79    3.27
   0  13  -4   70.05    3.17
   0  13  -4   70.36    3.70
   1  13   4   -0.56    1.46
  -1  13  -4   -1.07    1.42
  -1  13  -4    0.44    1.36
   1  13   4    2.20    1.94
  -2  13  -4   24.81    2.54
   2  13   4   30.35    2.43
   2  13   4   25.56    3.02
   3  13   4    0.37    1.41
   3  13   4   -2.65    2.17
  -3  13  -4   -0.05    1.59
   4 -13   4   15.46    2.85
  -4  13  -4   14.79    2.42
   4  13   4   12.09    1.77
   4  13   4   13.54    2.89
   5 -13   4    1.17    2.33
   5  13   4    1.06    2.37
   5  13   4    2.49    1.41
  -5  13  -4    1.17    1.81
   6 -13   4   -3.10    2.23
   6 -13   4   -1.14    2.52
   6  13   4   -0.43    1.28
   6  13   4    1.62    2.56
  -6  13  -4   -0.47    1.84
   7 -13   4   13.67    2.90
   7 -13   4   13.63    3.53
  -7  13  -4   13.71    2.61
   7  13   4   14.46    3.22
   8 -13   4    5.51    2.72
   8  13   4    5.89    2.90
  -8  13  -4    6.41    2.50
   9 -13   4   -3.49    2.21
   9  13   4   -1.92    2.66
  -9  13  -4   -1.16    2.26
  11 -14  -4   -1.92    2.34
  11  14  -4    0.61    2.16
 -11  14   4   -2.05    2.66
  10 -14  -4   10.47    2.94
  10  14  -4   10.73    2.56
 -10  14   4   11.54    2.99
   9 -14  -4   -1.04    2.19
   9  14  -4    1.96    1.74
   9  14  -4   -0.91    1.67
  -9  14   4   -1.88    2.35
   8 -14  -4    7.13    2.61
   8  14  -4    9.14    1.99
   8  14  -4   13.42    2.41
  -8  14   4    7.59    2.73
   7 -14  -4   36.95    3.53
  -7  14   4   36.62    3.37
   7  14  -4   25.55    2.81
   7  14  -4   32.54    3.02
   6 -14  -4   14.49    2.59
   6  14  -4   15.15    2.28
  -6  14   4   18.43    2.83
   6  14  -4   14.75    2.16
   5 -14  -4    4.84    2.26
   5  14  -4    3.06    1.05
  -5  14   4    3.08    2.55
   5  14  -4    2.21    1.56
   5  14  -4    3.96    1.65
   4 -14  -4   93.52    5.12
   4  14  -4   76.38    2.91
   4  14  -4   83.63    4.15
  -4  14   4   83.13    4.68
  -4  14   4   79.06    2.54
  -3  14   4   31.80    2.96
   3  14  -4   31.50    2.22
  -3  14   4   31.68    2.20
   3  14  -4   32.30    2.89
   2  14  -4   10.82    1.87
  -2  14   4   11.74    1.58
  -2  14   4   10.43    2.05
   2  14  -4   10.98    1.56
  -1  14   4   12.58    2.04
   1  14  -4    6.70    1.48
   1  14  -4    6.79    1.58
  -1  14   4    7.09    1.71
   0  14   4   16.58    2.26
   0  14   4   24.00    2.24
   0  14  -4   18.83    2.00
   0  14  -4   17.91    2.10
  -1  14  -4   47.84    3.04
   1  14   4   55.85    4.12
  -1  14  -4   50.76    3.43
   1  14   4   49.53    3.08
   2  14   4   10.76    2.54
   2  14   4    8.53    1.66
  -2  14  -4    9.86    2.06
  -3  14  -4    1.44    1.85
   3  14   4    1.35    2.37
   3  14   4    2.11    1.53
  -4  14  -4   32.94    2.98
   4  14   4   30.59    3.48
   5 -14   4   -4.36    2.07
   5  14   4   -0.44    1.31
  -5  14  -4    1.79    1.76
   5  14   4   -3.26    2.11
   6 -14   4   14.08    3.08
   6 -14   4   14.26    2.79
  -6  14  -4   13.57    2.42
   6  14   4   13.22    3.01
   6  14   4   11.33    1.98
   7 -14   4   -4.21    2.08
  -7  14  -4   -1.83    1.81
   7  14   4   -3.09    2.28
   8 -14   4    0.27    2.40
  -8  14  -4   -0.60    2.01
   8  14   4    1.41    2.70
   9 -14   4    2.64    2.85
   9  14   4    5.20    2.83
  -9  14  -4    3.32    2.41
  11 -15  -4   -3.86    2.36
 -11  15   4   -3.17    2.57
  11  15  -4    1.95    2.24
  10 -15  -4    4.09    2.72
 -10  15   4    3.89    2.75
  10  15  -4    1.84    1.83
  10  15  -4    5.01    2.39
   9 -15  -4    3.94    2.62
   9  15  -4    5.88    2.22
   9  15  -4    6.75    2.09
  -9  15   4    4.35    2.66
   8 -15  -4    4.63    2.42
   8  15  -4    4.71    1.84
   8  15  -4    3.99    1.95
  -8  15   4    6.28    2.69
   7 -15  -4    0.89    2.15
  -7  15   4   -1.36    2.06
   7  15  -4   -0.25    1.51
   7  15  -4    1.53    1.53
   6 -15  -4    2.06    2.16
   6  15  -4    1.54    1.65
  -6  15   4    1.02    2.39
   6  15  -4    1.92    1.54
   5 -15  -4    1.61    2.26
   5  15  -4    3.24    1.08
   5  15  -4    3.29    1.79
  -5  15   4    5.76    2.72
   5  15  -4    0.71    1.41
   4 -15  -4    0.04    2.11
  -4  15   4   -2.99    2.02
   4  15  -4   -0.27    1.31
   4  15  -4   -0.03    1.04
  -4  15   4   -0.41    0.71
   3  15  -4    2.87    1.48
  -3  15   4    4.90    2.32
   3  15  -4    3.38    1.23
  -3  15   4    5.44    1.20
  -2  15   4   16.80    1.75
   2  15  -4   17.37    1.83
   2  15  -4   16.37    2.14
  -2  15   4   21.82    2.57
   1  15  -4   45.79    3.31
  -1  15   4   42.63    3.04
  -1  15   4   42.65    3.05
   1  15  -4   44.89    2.58
   0  15  -4    4.49    1.56
   0  15   4    4.62    1.86
   0  15  -4    5.70    1.64
   0  15   4    3.47    1.79
   1  15   4   29.19    3.00
  -1  15  -4   40.40    3.19
   1  15   4   31.27    2.68
  -1  15  -4   35.44    3.08
   2  15   4    4.21    2.28
  -2  15  -4    7.57    2.04
   2  15   4    8.42    1.82
   3  15   4   26.83    2.16
  -3  15  -4   24.83    2.80
   3  15   4   19.87    3.08
   4  15   4   17.84    2.97
  -4  15  -4   17.49    2.46
   5 -15   4   -0.68    2.35
  -5  15  -4    1.87    1.79
   5  15   4    1.67    2.38
   5  15   4    1.03    1.38
   6 -15   4    7.72    2.97
   6 -15   4    7.11    2.69
  -6  15  -4    7.15    2.17
   6  15   4    8.69    1.87
   6  15   4    9.17    2.87
   7 -15   4    0.33    2.37
   7  15   4   -0.78    2.40
  -7  15  -4    0.39    1.99
   8 -15   4   -1.33    2.55
  -8  15  -4    3.13    2.27
   8  15   4   -1.56    2.59
   9 -15   4    3.15    2.88
  -9  15  -4    3.67    2.51
   9  15   4    0.70    2.75
  11 -16  -4    1.54    2.73
  11  16  -4    8.06    2.68
 -11  16   4    5.07    2.97
  10 -16  -4   -2.30    2.44
  10  16  -4   -0.37    1.85
  10  16  -4    0.94    2.04
 -10  16   4   -2.89    2.49
   9 -16  -4    0.80    2.48
  -9  16   4    8.95    2.84
   9  16  -4    7.27    2.32
   9  16  -4    6.86    2.17
   8 -16  -4   -0.13    2.34
   8  16  -4    0.53    1.52
   8  16  -4   -0.15    1.69
  -8  16   4   -1.21    2.45
   7 -16  -4    7.39    2.54
   7  16  -4    8.97    2.18
  -7  16   4   10.29    2.61
   7  16  -4   10.36    2.15
   6 -16  -4    5.72    2.36
  -6  16   4    5.83    2.56
   6  16  -4    4.00    1.86
   6  16  -4    5.73    1.78
   5 -16  -4    6.45    2.48
   5  16  -4    9.52    1.98
   5  16  -4    8.42    1.97
  -5  16   4    8.09    2.81
   4 -16  -4    8.59    2.53
  -4  16   4    4.74    2.63
   4  16  -4    7.59    1.76
   4  16  -4    9.62    1.40
   3  16  -4   17.89    2.34
   3  16  -4   17.92    1.75
  -3  16   4   17.97    2.80
  -3  16   4   17.83    1.62
   2  16  -4   83.77    4.34
   2  16  -4   84.46    3.44
  -2  16   4   81.42    4.36
  -2  16   4   85.34    3.70
   1  16  -4   13.65    2.06
  -1  16   4   17.54    2.41
   1  16  -4   18.63    2.06
  -1  16   4   15.02    2.02
   0  16  -4   37.13    2.95
   0  16   4   31.48    2.66
   0  16  -4   22.13    2.41
   0  16   4   34.63    3.30
  -1  16  -4   16.77    2.33
   1  16   4   22.49    2.29
  -1  16  -4   16.64    2.27
   1  16   4   16.20    2.53
  -2  16  -4    6.70    2.01
   2  16   4    5.09    2.34
   2  16   4    4.69    1.78
  -3  16  -4   17.22    2.59
   3  16   4   19.03    1.94
   3  16   4   18.50    2.92
   4  16   4   10.68    2.48
  -4  16  -4    6.55    2.00
   5 -16   4   -0.70    2.39
  -5  16  -4    6.25    2.08
   5  16   4    3.89    2.45
   6 -16   4    6.23    2.80
   6 -16   4    9.58    3.12
   6  16   4    7.57    1.94
  -6  16  -4    3.46    2.10
   6  16   4    6.37    2.72
   7 -16   4   13.01    3.00
  -7  16  -4   15.04    2.81
   7  16   4   10.93    3.16
   8 -16   4   -4.51    2.31
  -8  16  -4   -1.13    2.13
   8  16   4   -1.36    2.31
   9 -16   4    2.66    2.78
   9  16   4   -0.10    2.59
  -9  16  -4   -2.48    2.22
  11 -17  -4    4.75    2.93
  11  17  -4    7.48    2.77
 -11  17   4    3.78    3.11
  10 -17  -4    2.35    2.74
  10  17  -4    3.40    2.36
  10  17  -4    4.43    2.16
 -10  17   4    4.96    2.96
   9 -17  -4    3.55    2.47
   9  17  -4    7.81    2.22
  -9  17   4    3.27    2.71
   9  17  -4    8.59    2.43
   8 -17  -4   12.75    2.94
   8  17  -4   14.19    2.48
   8  17  -4   15.40    2.69
  -8  17   4   13.68    3.05
   7 -17  -4   -0.99    2.22
  -7  17   4    0.06    2.19
   7  17  -4    2.88    1.92
   7  17  -4    2.21    1.68
   6 -17  -4   11.60    2.60
  -6  17   4   10.21    2.52
   6  17  -4   10.08    2.07
   6  17  -4    8.67    2.18
   5 -17  -4   10.31    2.62
   5  17  -4   10.06    2.11
  -5  17   4   10.16    2.59
   4 -17  -4    1.51    2.32
   4  17  -4    3.10    1.58
  -4  17   4    4.18    2.65
   4  17  -4    2.17    1.16
  -3  17   4   13.23    1.52
   3  17  -4   13.95    1.67
  -3  17   4   13.46    2.77
   3  17  -4    9.41    2.04
  -2  17   4   12.00    2.57
   2  17  -4   17.26    1.94
   2  17  -4   11.99    2.15
  -2  17   4   12.59    1.78
   1  17  -4   25.63    2.28
   1  17  -4   20.64    2.48
  -1  17   4   21.55    2.26
  -1  17   4   22.93    2.62
   0  17  -4   51.37    3.32
   0  17   4   47.64    3.69
   0  17   4   56.85    3.80
   0  17  -4   49.36    3.56
   1  17   4   -1.02    1.62
  -1  17  -4    1.77    1.73
   1  17   4   -0.08    1.90
  -1  17  -4    1.43    1.67
  -2  17  -4   21.66    2.54
  -2  17  -4   21.40    2.66
   2  17   4   22.46    2.29
   2  17   4   20.91    2.91
   3  17   4   19.79    2.79
  -3  17  -4   24.65    2.85
  -4  17  -4   15.56    2.58
   4  17   4   11.84    2.51
   5 -17   4   24.96    3.54
  -5  17  -4   19.71    2.90
   5  17   4   23.32    3.24
   6 -17   4   -1.08    2.34
   6 -17   4    1.58    2.84
  -6  17  -4    0.85    2.09
   6  17   4   -0.78    2.32
   7 -17   4    4.45    2.72
  -7  17  -4    8.02    2.54
   7  17   4    4.35    2.73
   8 -17   4    2.21    2.72
  -8  17  -4    2.27    2.37
   8  17   4    0.16    2.62
   9 -17   4   -4.07    2.46
   9  17   4   -0.43    2.66
  -9  17  -4   -2.01    2.19
  11 -18  -4   -3.02    2.45
 -11  18   4   -4.96    2.78
  11  18  -4   -0.95    2.13
  10 -18  -4    1.38    2.74
  10  18  -4    2.61    2.33
 -10  18   4   -1.89    2.69
  10  18  -4    2.55    2.01
   9 -18  -4   -0.50    2.20
  -9  18   4   -0.05    2.62
   9  18  -4    4.55    2.31
   9  18  -4    3.20    1.95
   8 -18  -4    2.36    2.28
   8  18  -4    0.77    1.62
   8  18  -4    2.14    1.86
  -8  18   4    0.43    2.61
   7 -18  -4    7.60    2.66
   7  18  -4    8.69    2.30
   7  18  -4    5.94    1.97
  -7  18   4    4.87    2.50
   6 -18  -4    3.94    2.40
   6  18  -4    7.03    2.07
   6  18  -4    5.09    1.82
  -6  18   4    6.69    2.59
   5 -18  -4    2.00    2.35
   5  18  -4    2.56    1.65
  -5  18   4    1.16    2.16
   4  18  -4   -0.21    1.56
   4  18  -4   -1.35    1.02
  -4  18   4   -1.40    2.22
  -3  18   4    3.08    2.48
   3  18  -4    0.98    1.64
   3  18  -4    1.48    1.26
  -3  18   4    0.93    1.14
   2  18  -4    4.95    1.70
  -2  18   4    2.16    1.40
   2  18  -4    4.14    1.44
  -2  18   4    0.34    2.00
   1  18  -4    5.34    1.89
  -1  18   4    5.37    1.68
   1  18  -4    7.33    1.71
  -1  18   4    5.62    2.23
   0  18  -4    2.14    1.68
   0  18  -4    2.91    1.71
   0  18   4    4.50    2.02
   0  18   4    6.41    1.92
  -1  18  -4    2.04    1.72
   1  18   4    2.37    1.92
  -1  18  -4   -0.36    1.68
   1  18   4   -1.34    1.88
   2  18   4    2.29    2.17
  -2  18  -4    2.90    1.79
   2  18   4    2.28    1.72
  -2  18  -4    2.39    1.73
   3  18   4    4.69    2.09
  -3  18  -4    4.82    1.89
   4  18   4   -0.34    2.15
  -4  18  -4   -1.14    1.67
   5 -18   4   -0.57    2.66
   5  18   4   -0.62    2.25
  -5  18  -4    1.45    2.10
   6 -18   4   -4.88    2.24
   6  18   4   -2.14    2.19
  -6  18  -4   -1.67    1.95
   7 -18   4   -0.96    2.57
   7  18   4   -0.09    2.41
  -7  18  -4    4.49    2.42
   8 -18   4   -1.80    2.53
  -8  18  -4    2.79    2.41
   8  18   4   -2.62    2.45
  11 -19  -4    1.88    2.79
  11  19  -4    5.70    2.75
 -11  19   4    0.89    2.88
  10 -19  -4    6.42    3.15
 -10  19   4    1.36    2.91
  10  19  -4    7.55    2.57
  10  19  -4    8.74    2.50
   9 -19  -4    1.25    2.65
  -9  19   4    1.36    2.79
   9  19  -4    4.54    2.38
   9  19  -4    5.25    2.12
   8 -19  -4   33.20    3.77
   8  19  -4   30.85    3.32
  -8  19   4   36.36    4.02
   8  19  -4   30.75    3.59
   7 -19  -4   -1.06    2.32
   7  19  -4    1.31    1.75
   7  19  -4   -0.43    1.89
  -7  19   4    0.29    2.36
   6 -19  -4   19.92    3.17
   6  19  -4   25.86    2.93
  -6  19   4   27.01    3.46
   5 -19  -4   15.20    2.87
   5  19  -4   17.26    2.49
  -5  19   4   15.95    2.96
  -4  19   4    7.25    2.51
   4  19  -4    2.98    1.79
   4  19  -4    5.64    1.28
  -3  19   4   48.67    3.94
   3  19  -4   57.06    3.99
  -3  19   4   58.83    3.09
   3  19  -4   53.50    2.90
  -2  19   4   14.35    1.96
   2  19  -4   11.86    2.25
  -2  19   4   22.38    2.86
   2  19  -4   16.94    1.96
  -1  19   4   -1.61    2.04
   1  19  -4    1.63    1.53
  -1  19   4   -0.55    1.48
   1  19  -4    0.60    1.52
   0  19  -4   25.83    2.61
   0  19   4   27.74    2.84
   0  19   4   27.29    2.73
   0  19  -4   23.81    2.61
  -1  19  -4    2.53    1.76
   1  19   4    5.46    2.07
   1  19   4    3.33    2.00
  -1  19  -4    1.17    1.80
   2  19   4   16.82    2.59
  -2  19  -4   21.36    2.54
   2  19   4   22.41    2.28
  -2  19  -4   18.28    2.59
  -3  19  -4    5.52    2.07
   3  19   4    8.44    2.44
   4  19   4    2.49    2.30
  -4  19  -4    1.08    2.02
   5 -19   4   -4.35    2.38
   5  19   4    1.99    2.33
  -5  19  -4    0.90    2.08
   6 -19   4    2.18    2.55
  -6  19  -4    4.83    2.37
   6  19   4    1.03    2.18
   7 -19   4    2.67    2.85
   7  19   4    5.45    2.70
  -7  19  -4    4.80    2.51
   8 -19   4    1.94    2.90
  -8  19  -4    0.93    2.37
   8  19   4    4.13    2.73
  10 -20  -4   -0.50    2.75
  10  20  -4    4.17    2.34
  10  20  -4    4.43    2.66
 -10  20   4    4.63    3.04
   9 -20  -4    6.44    3.00
   9  20  -4    8.13    2.73
   9  20  -4    5.50    2.29
  -9  20   4    6.56    3.07
   8 -20  -4   -1.02    2.47
   8  20  -4    2.09    2.15
  -8  20   4   -0.01    2.40
   8  20  -4    2.68    1.90
   7 -20  -4    5.34    2.73
   7  20  -4    4.85    2.18
   7  20  -4    8.25    2.19
  -7  20   4    6.31    2.59
   6 -20  -4    3.53    2.54
  -6  20   4    2.40    2.28
   6  20  -4    2.31    1.88
   5 -20  -4   -2.12    2.30
  -5  20   4    3.05    2.41
   5  20  -4    0.01    1.45
  -4  20   4    4.57    2.32
   4  20  -4    3.51    1.82
   4  20  -4    6.94    1.36
   3  20  -4   10.12    2.18
  -3  20   4    9.32    2.80
  -3  20   4   10.31    1.55
   3  20  -4   13.64    1.78
   2  20  -4   23.16    2.80
  -2  20   4   20.96    2.22
   2  20  -4   25.48    2.32
  -2  20   4   24.16    3.12
   1  20  -4   20.89    2.32
  -1  20   4   22.54    2.47
   1  20  -4   20.56    2.69
  -1  20   4   23.39    2.88
   0  20  -4   10.42    2.07
   0  20   4   10.81    2.17
   0  20   4   13.28    2.39
   0  20  -4   11.22    2.09
   1  20   4   14.89    2.43
  -1  20  -4   18.97    2.46
  -1  20  -4   19.91    2.51
   1  20   4   19.33    2.48
  -2  20  -4    0.68    1.61
   2  20   4   -1.79    1.54
  -2  20  -4   -0.74    1.66
   2  20   4    0.44    1.68
  -3  20  -4   77.60    4.49
   3  20   4   84.80    5.04
   4  20   4   45.58    4.31
  -4  20  -4   33.76    3.35
   5 -20   4   -1.95    2.51
  -5  20  -4    1.00    1.97
   5  20   4   -1.04    1.90
   6 -20   4   -0.68    2.55
  -6  20  -4    2.80    2.09
   6  20   4   -1.22    2.19
   7 -20   4    0.56    2.77
  -7  20  -4   -2.90    2.12
   7  20   4   -5.52    2.01
   8 -20   4    1.47    2.90
   8  20   4    3.81    2.94
  -8  20  -4    3.50    2.71
  10 -21  -4   -4.03    2.63
 -10  21   4   -1.80    2.80
  10  21  -4   -1.33    2.21
  10  21  -4    3.40    2.21
   9 -21  -4    0.78    2.87
   9  21  -4    0.57    2.05
   9  21  -4    1.22    2.06
  -9  21   4    0.32    2.84
   8 -21  -4    1.03    2.59
  -8  21   4    2.04    2.73
   8  21  -4   -0.14    1.70
   8  21  -4    0.70    2.12
   7 -21  -4    1.31    2.62
  -7  21   4    4.68    2.80
   7  21  -4    3.13    1.94
   6 -21  -4   -1.05    2.36
   6  21  -4    2.51    1.88
  -6  21   4   -2.40    2.36
   5 -21  -4   -1.50    2.43
  -5  21   4    1.96    2.15
   5  21  -4    2.10    1.82
  -4  21   4    4.51    2.34
   4  21  -4    7.37    2.09
   3  21  -4    3.19    1.35
   3  21  -4    3.46    1.88
  -3  21   4    2.79    2.43
  -3  21   4    1.47    1.20
   2  21  -4   20.42    2.72
  -2  21   4   23.28    2.89
   2  21  -4   20.67    2.16
  -2  21   4   18.91    2.17
   1  21  -4    3.72    1.88
  -1  21   4    6.00    2.34
  -1  21   4    6.04    1.81
   1  21  -4    4.58    1.77
   0  21   4    0.41    1.74
   0  21   4    1.96    2.00
   0  21  -4    1.75    1.67
   0  21  -4    0.39    1.60
   1  21   4   10.45    2.25
  -1  21  -4    9.91    2.08
   1  21   4   10.79    2.15
  -1  21  -4   10.19    2.15
  -2  21  -4    2.14    1.77
   2  21   4    5.32    1.92
   2  21   4    5.69    1.90
  -2  21  -4    6.25    2.11
  -3  21  -4    9.52    2.26
   3  21   4    7.24    2.37
  -4  21  -4    2.04    2.01
   4  21   4    1.87    2.24
   5 -21   4    8.05    3.07
   5  21   4   13.92    2.85
  -5  21  -4   10.71    2.51
   6 -21   4    0.23    2.74
   6  21   4    0.73    2.30
  -6  21  -4    1.43    2.27
   7 -21   4   -6.11    2.45
   7  21   4   -3.20    2.32
  -7  21  -4   -1.07    2.27
   8 -21   4   -5.98    2.72
  -8  21  -4   -2.21    2.31
   8  21   4   -1.63    2.70
  10 -22  -4   -3.00    2.66
 -10  22   4   -6.22    2.54
  10  22  -4    0.73    2.47
  10  22  -4   -1.75    1.82
   9 -22  -4    1.88    2.89
  -9  22   4    0.00    2.85
   9  22  -4    3.90    2.18
   9  22  -4   -1.92    2.25
   8 -22  -4   -0.82    2.64
   8  22  -4    0.58    2.03
  -8  22   4   -3.60    2.59
   7 -22  -4   -2.25    2.35
   7  22  -4   -1.12    1.74
  -7  22   4   -3.30    2.46
   6 -22  -4    8.51    2.84
  -6  22   4    6.30    2.90
   6  22  -4    6.64    2.16
   5 -22  -4    1.41    2.54
  -5  22   4    1.74    2.47
   5  22  -4    0.43    1.81
   4  22  -4    7.07    1.95
  -4  22   4    7.66    2.45
  -3  22   4   16.59    1.87
  -3  22   4   19.50    2.78
   3  22  -4   17.86    2.49
   3  22  -4   17.92    1.93
  -2  22   4   45.02    3.19
   2  22  -4   44.72    3.77
   2  22  -4   46.81    3.04
  -2  22   4   46.91    4.09
  -1  22   4    3.14    1.79
  -1  22   4    9.76    2.41
   1  22  -4    7.08    1.91
   1  22  -4    8.67    1.85
   0  22   4    0.51    2.04
   0  22   4    1.26    1.66
   0  22  -4    0.25    1.63
   0  22  -4    1.83    1.65
   1  22   4   15.01    2.47
  -1  22  -4   21.14    2.61
  -1  22  -4   17.13    2.45
   1  22   4   16.33    2.40
  -2  22  -4    2.03    1.70
  -2  22  -4   -2.11    1.81
   2  22   4   -0.32    1.88
   3  22   4   28.57    3.21
  -3  22  -4   43.09    3.55
  -4  22  -4   50.19    3.88
   4  22   4   51.53    4.51
   5  22   4    1.56    2.24
  -5  22  -4    4.30    2.37
   6 -22   4   -1.45    2.80
  -6  22  -4    8.22    2.66
   6  22   4    3.20    2.46
   7 -22   4    0.16    2.90
  -7  22  -4    1.85    2.55
   7  22   4    2.20    2.80
   8 -22   4   -6.75    2.50
   8  22   4   -3.36    2.53
  -8  22  -4    1.39    2.55
  10 -23  -4    1.14    3.01
  10  23  -4   -0.48    2.59
  10  23  -4    3.13    2.26
 -10  23   4   -2.48    2.81
   9 -23  -4    7.74    3.34
   9  23  -4    8.74    2.54
  -9  23   4    5.74    3.20
   8 -23  -4   17.90    3.65
   8  23  -4   18.89    3.10
  -8  23   4   22.06    3.73
   7 -23  -4   -4.84    2.40
   7  23  -4    0.55    1.86
  -7  23   4   -3.72    2.49
   6 -23  -4   35.74    3.96
   6  23  -4   34.24    3.57
  -6  23   4   38.05    4.02
   5 -23  -4    9.23    2.96
  -5  23   4   15.71    2.90
   5  23  -4   13.85    2.56
  -4  23   4    0.91    2.19
   4  23  -4    0.18    1.73
   3  23  -4   42.87    3.82
  -3  23   4   37.92    2.66
  -3  23   4   28.84    3.33
   3  23  -4   39.99    2.68
   2  23  -4   30.31    2.57
   2  23  -4   27.13    2.96
  -2  23   4   30.82    2.84
  -2  23   4   29.37    3.17
  -1  23   4    3.01    2.15
   1  23  -4    2.50    1.70
   1  23  -4    6.08    2.01
  -1  23   4    4.16    1.75
   0  23  -4   -0.05    1.60
   0  23  -4    1.72    1.66
   0  23   4   -1.50    1.55
   0  23   4   -2.62    1.96
  -1  23  -4    1.30    1.78
  -1  23  -4    1.74    1.68
   1  23   4    2.57    1.94
   1  23   4    0.99    1.83
  -2  23  -4    7.75    2.08
   2  23   4    7.87    2.29
  -2  23  -4    6.50    2.28
  -3  23  -4    2.22    1.94
   3  23   4    2.05    2.12
  -4  23  -4   13.92    2.67
   4  23   4   16.61    2.85
  -5  23  -4    2.12    2.28
   5  23   4    1.29    2.31
   6 -23   4   -1.34    2.82
   6  23   4   -2.27    2.02
  -6  23  -4    0.20    2.28
   7 -23   4    2.57    3.12
   7  23   4    4.57    2.95
  -7  23  -4    6.08    2.80
   9 -24  -4   -0.24    2.91
   9  24  -4    4.86    2.27
  -9  24   4    2.88    3.07
   8 -24  -4   -2.43    2.67
   8  24  -4   -1.12    1.82
  -8  24   4   -1.47    2.55
   7 -24  -4   -0.32    2.68
   7  24  -4    1.56    2.00
  -7  24   4    0.64    2.43
   6 -24  -4   -4.47    2.47
   6  24  -4    1.97    1.94
  -6  24   4   -0.46    2.38
   5 -24  -4    0.37    2.73
   5  24  -4    4.53    1.99
  -5  24   4    6.56    2.86
  -4  24   4   15.00    2.77
   4  24  -4   14.78    2.63
   3  24  -4   14.69    1.89
   3  24  -4   13.20    2.41
  -3  24   4   10.15    2.70
   2  24  -4   18.26    2.16
  -2  24   4   14.50    2.00
   2  24  -4   14.68    2.53
  -2  24   4   14.79    2.69
   1  24  -4    1.72    1.62
   1  24  -4   -0.82    1.46
  -1  24   4    1.27    1.59
  -1  24   4    0.48    2.07
   0  24  -4    8.02    2.06
   0  24   4    7.49    2.12
   0  24  -4   11.27    2.18
   0  24   4    7.98    2.19
  -1  24  -4   15.41    2.50
   1  24   4    8.77    2.24
   1  24   4   12.92    2.30
  -1  24  -4   15.56    2.47
  -2  24  -4   -0.25    1.66
  -2  24  -4   -1.08    1.88
   2  24   4    1.13    1.95
  -3  24  -4   -2.97    1.86
   3  24   4    0.85    1.99
   4  24   4    2.41    2.32
  -4  24  -4    2.56    2.12
  -5  24  -4   -0.36    2.09
   5  24   4   -1.67    2.17
   6 -24   4    3.25    3.15
   6  24   4    4.69    2.50
  -6  24  -4    7.73    2.78
   7 -24   4   -1.10    2.92
   7  24   4   -1.46    2.46
  -7  24  -4   -0.77    2.45
   9 -25  -4    0.90    3.00
   9  25  -4   -2.50    2.06
  -9  25   4   -4.61    2.80
   8 -25  -4    1.27    3.05
   8  25  -4    6.55    2.39
  -8  25   4    9.25    3.36
   7 -25  -4   -1.76    2.71
  -7  25   4   -2.11    2.34
   7  25  -4    3.10    2.14
   6 -25  -4    4.60    2.95
  -6  25   4    5.94    2.99
   6  25  -4    4.36    2.16
   5 -25  -4    5.80    3.02
   5  25  -4    9.02    2.28
  -5  25   4    9.55    3.03
   4  25  -4    1.60    1.88
  -4  25   4    0.12    2.51
   3  25  -4   -2.25    1.30
  -3  25   4    0.77    2.36
   3  25  -4   -0.23    1.73
   2  25  -4    2.13    1.89
   2  25  -4    0.13    1.48
  -2  25   4    0.51    2.22
  -2  25   4    0.84    1.40
   1  25  -4    2.38    1.87
  -1  25   4    6.20    2.26
   1  25  -4    0.99    1.57
  -1  25   4    1.53    1.53
   0  25  -4    0.54    1.52
   0  25  -4   -0.77    1.65
   0  25   4    1.42    1.82
   0  25   4   -1.65    1.94
  -1  25  -4    0.14    1.70
  -1  25  -4   -0.02    1.79
   1  25   4    0.76    1.83
   1  25   4    2.05    1.93
  -2  25  -4    0.18    1.69
  -2  25  -4    1.58    1.89
   2  25   4    1.66    2.06
   3  25   4    5.36    2.37
  -3  25  -4    5.96    2.42
  -4  25  -4   -1.67    2.10
   4  25   4    0.48    2.20
   5  25   4   -2.41    2.20
  -5  25  -4    0.30    2.32
   6 -25   4   -4.51    2.89
   6  25   4   -0.03    2.42
  -6  25  -4    0.47    2.29
   7 -25   4   -1.68    2.94
   7  25   4   -2.03    2.41
  -7  25  -4   -0.66    2.49
   9 -26  -4   -3.28    2.88
   9  26  -4   -1.73    2.15
  -9  26   4   -4.36    2.72
   8 -26  -4   -4.51    2.81
   8  26  -4    1.18    2.18
  -8  26   4    1.13    3.06
   7 -26  -4    0.81    2.91
   7  26  -4   -0.60    1.96
  -7  26   4   -1.37    2.52
   6 -26  -4   -3.08    2.60
  -6  26   4   -4.44    2.51
   6  26  -4    0.20    1.90
   5 -26  -4   -3.21    2.86
   5  26  -4    2.02    1.81
  -5  26   4   -2.27    2.55
   4  26  -4    1.24    1.66
  -4  26   4   -0.85    2.53
  -3  26   4    1.63    2.17
   3  26  -4    2.08    1.99
  -2  26   4   27.50    3.24
  -2  26   4   32.60    2.92
   2  26  -4   34.44    2.81
   2  26  -4   31.14    3.40
  -1  26   4    5.17    2.31
   1  26  -4    0.82    1.64
   1  26  -4    3.37    2.05
  -1  26   4    1.32    1.66
   0  26   4   27.30    2.93
   0  26   4   27.49    2.97
   0  26  -4   16.89    2.58
   0  26  -4   24.77    2.79
  -1  26  -4   25.70    2.99
  -1  26  -4   25.98    3.07
   1  26   4   23.83    3.05
  -2  26  -4    3.56    2.00
   2  26   4    2.73    2.08
  -2  26  -4    3.87    2.18
   3  26   4   16.89    2.92
  -3  26  -4   16.44    2.81
  -4  26  -4   13.74    2.96
   4  26   4   11.41    2.81
  -5  26  -4   -1.62    2.34
   5  26   4   -3.32    2.11
   6 -26   4    0.33    3.22
   6  26   4    5.51    2.85
  -6  26  -4    1.95    2.62
   7 -26   4   -0.63    3.05
   7  26   4    4.81    2.93
  -7  26  -4    1.89    2.69
   9 -27  -4   12.65    3.85
   9  27  -4   16.65    3.23
  -9  27   4   12.05    3.60
   8 -27  -4   29.35    4.39
  -8  27   4   37.32    4.52
   8  27  -4   36.66    4.16
   7 -27  -4   -2.13    2.79
  -7  27   4   -1.57    2.61
   7  27  -4    3.44    2.30
   6 -27  -4   10.77    3.58
   6  27  -4   12.42    2.83
  -6  27   4    5.49    2.85
   5 -27  -4   13.32    3.46
   5  27  -4   18.77    2.93
  -5  27   4   24.25    3.69
  -4  27   4   -0.05    2.59
   4  27  -4    1.62    1.86
   3  27  -4   10.49    2.51
  -3  27   4   14.33    2.98
  -2  27   4    2.78    1.60
   2  27  -4    4.34    2.10
  -2  27   4    2.87    2.39
   2  27  -4    3.19    1.71
   1  27  -4    1.16    1.78
  -1  27   4    2.37    2.22
   1  27  -4    3.00    1.97
  -1  27   4    3.05    1.85
   0  27  -4    3.28    1.95
   0  27   4    3.38    1.93
   0  27   4    2.13    2.24
   0  27  -4    0.82    1.75
  -1  27  -4    2.53    1.83
  -1  27  -4   -0.42    1.85
   1  27   4   -0.92    1.74
  -2  27  -4   -0.25    1.70
  -2  27  -4   -1.88    1.93
   2  27   4   -1.01    1.92
   3  27   4    0.34    2.01
  -3  27  -4   -0.13    2.13
   4  27   4    0.01    2.21
  -4  27  -4    2.75    2.25
  -5  27  -4    0.03    2.31
   5  27   4    1.95    2.48
   6 -27   4   -5.54    2.99
  -6  27  -4   -0.66    2.50
   6  27   4   -1.04    2.44
   8 -28  -4   -1.50    2.97
  -8  28   4   -2.30    2.95
   8  28  -4    0.83    2.22
   7  28  -4    1.37    2.16
  -7  28   4   -3.20    2.60
   6 -28  -4   -8.62    2.69
  -6  28   4   -3.04    2.75
   6  28  -4    0.15    2.12
   5  28  -4    0.76    1.97
  -5  28   4   -5.72    2.50
   4  28  -4    0.31    1.69
  -4  28   4   -1.25    2.49
   3  28  -4    4.34    2.02
  -3  28   4   -1.49    2.40
   2  28  -4    6.66    2.31
  -2  28   4    6.38    2.75
  -2  28   4    2.00    1.62
   2  28  -4    4.41    1.81
   1  28  -4    1.61    1.72
  -1  28   4   -2.16    2.28
   1  28  -4   -1.77    1.74
  -1  28   4    0.17    1.65
   0  28  -4    1.15    1.79
   0  28  -4    0.47    1.83
   0  28   4   -1.66    1.62
   0  28   4    0.19    2.08
  -1  28  -4    1.24    1.78
   1  28   4   -1.02    1.74
  -1  28  -4   -0.45    1.83
  -2  28  -4    1.06    1.83
  -2  28  -4    3.18    2.25
   2  28   4    3.95    2.16
  -3  28  -4    0.03    2.22
   3  28   4    2.38    2.23
   4  28   4    4.96    2.48
  -4  28  -4    0.66    2.45
  -5  28  -4   -1.49    2.44
   5  28   4    0.56    2.46
   6 -28   4   -6.51    2.93
   6  28   4   -3.74    2.25
  -6  28  -4   -3.68    2.09
   8 -29  -4    3.20    3.42
   8  29  -4    7.41    2.84
  -8  29   4    1.51    2.99
   7 -29  -4   -3.63    2.92
  -7  29   4   -1.36    2.90
   7  29  -4    2.10    2.37
   6 -29  -4   14.09    3.75
   6  29  -4   19.18    3.28
  -6  29   4   21.25    3.95
   5  29  -4    6.75    2.50
  -5  29   4    3.59    2.96
   4  29  -4    3.23    2.02
  -4  29   4   -1.92    2.59
   3  29  -4    3.64    2.02
  -3  29   4    1.15    2.49
   2  29  -4    3.50    1.77
   2  29  -4    2.68    2.04
  -2  29   4    4.33    1.73
  -2  29   4    1.39    2.42
   1  29  -4    1.78    2.00
  -1  29   4    2.58    2.40
   1  29  -4    5.01    2.08
  -1  29   4    3.64    1.83
   0  29  -4   11.50    2.46
   0  29   4    9.33    2.32
   0  29  -4    8.65    2.23
   0  29   4    6.51    2.51
   1  29   4   -1.03    1.76
  -1  29  -4    2.58    2.08
  -1  29  -4   -0.78    1.74
  -2  29  -4    0.75    2.17
  -2  29  -4    0.45    1.89
   2  29   4    4.35    2.20
  -3  29  -4   -3.88    2.11
   3  29   4    2.91    2.34
   4  29   4    6.00    2.54
  -4  29  -4   -1.57    2.40
   5  29   4    0.78    2.44
  -5  29  -4    3.24    2.42
   6 -29   4   -3.58    3.19
   6  29   4   -3.03    2.28
  -6  29  -4    2.38    2.62
   8 -30  -4   -4.01    3.06
   8  30  -4    2.30    2.43
  -8  30   4   -5.40    2.70
   7 -30  -4   -1.40    3.18
   7  30  -4    4.96    2.62
  -7  30   4    1.06    3.05
   6 -30  -4   -5.70    3.01
  -6  30   4   -3.01    2.90
   6  30  -4    0.94    2.01
   5  30  -4    4.65    2.41
  -5  30   4    4.68    3.13
   4  30  -4    5.43    2.43
  -4  30   4    3.68    2.91
   3  30  -4    2.29    2.04
  -3  30   4    2.23    2.55
   2  30  -4   13.68    2.86
  -2  30   4    8.71    2.88
  -1  30   4    1.26    1.74
   1  30  -4    0.30    1.93
   1  30  -4   -1.87    1.72
  -1  30   4   -3.02    2.40
   0  30   4    7.31    2.18
   0  30  -4    7.07    2.29
   0  30  -4    8.97    2.36
   1  30   4    9.22    2.53
  -1  30  -4   13.47    2.65
  -1  30  -4   11.01    2.66
  -2  30  -4    0.35    2.21
  -2  30  -4    0.51    1.86
   2  30   4    0.55    1.98
   3  30   4    5.23    2.46
  -3  30  -4    7.73    2.73
  -4  30  -4    1.29    2.56
   4  30   4    2.35    2.37
   5  30   4   -2.94    2.19
  -5  30  -4    0.99    2.58
   7 -31  -4    1.24    3.31
  -7  31   4    0.39    3.03
   7  31  -4    4.72    2.54
   6 -31  -4   -7.73    3.24
   6  31  -4    1.20    2.36
  -6  31   4    1.87    2.81
  -5  31   4   -0.53    3.01
   5  31  -4   -0.53    2.15
  -4  31   4   -1.65    2.71
   4  31  -4    2.48    2.29
   3  31  -4   13.15    2.82
  -3  31   4   11.09    3.05
   2  31  -4    1.91    2.06
  -2  31   4    1.49    2.60
  -1  31   4    0.87    1.75
  -1  31   4   -2.93    2.35
   1  31  -4   -1.37    1.82
   1  31  -4    2.08    2.04
   0  31   4   -0.55    1.73
   0  31  -4   -0.64    1.86
   0  31  -4    0.85    1.94
  -1  31  -4    2.63    2.02
   1  31   4    0.71    2.00
  -1  31  -4    3.27    2.23
   2  31   4    5.30    2.33
  -2  31  -4    2.23    2.38
  -2  31  -4    2.53    2.08
  -3  31  -4   -1.42    2.27
   3  31   4   -0.48    2.16
   4  31   4    0.52    2.28
  -4  31  -4    0.57    2.61
  -5  31  -4    0.02    2.59
   5  31   4   -0.61    2.26
   7 -32  -4    0.77    3.41
   7  32  -4    7.15    2.78
  -7  32   4    3.07    3.19
   6 -32  -4   -6.07    3.14
  -6  32   4    2.28    3.21
   6  32  -4    4.84    2.55
   5  32  -4    2.21    2.35
  -5  32   4   -3.27    2.94
   4  32  -4   10.27    2.84
  -4  32   4    3.82    2.97
  -3  32   4    0.55    2.64
   3  32  -4    3.89    2.40
  -2  32   4   -1.29    2.67
   2  32  -4    3.18    2.32
  -1  32   4   -0.55    1.76
  -1  32   4   -5.34    2.43
   1  32  -4   -0.07    1.93
   1  32  -4    0.98    2.01
   0  32  -4   19.29    3.06
   0  32  -4   17.91    2.87
   0  32   4   13.86    2.71
  -1  32  -4    2.07    2.23
   1  32   4    4.31    2.24
  -1  32  -4    5.57    2.32
  -2  32  -4    1.32    2.32
   2  32   4   -0.11    2.01
  -2  32  -4    0.48    1.98
   3  32   4   -1.87    2.02
  -3  32  -4   -0.92    2.37
   4  32   4   -0.31    2.25
  -4  32  -4   -3.86    2.32
   6 -33  -4    1.19    3.51
   6  33  -4    7.93    2.78
  -6  33   4    0.58    3.13
  -5  33   4    6.92    3.35
   5  33  -4   10.26    2.95
   4  33  -4    3.17    2.42
  -4  33   4   -6.07    2.66
   3  33  -4   10.53    2.86
  -3  33   4    6.79    3.27
  -2  33   4    2.61    2.73
   2  33  -4   10.46    2.77
  -1  33   4   -0.33    2.57
  -1  33   4    0.73    1.75
   1  33  -4    3.26    2.26
   0  33  -4    3.37    2.27
   0  33   4    3.23    2.15
   0  33  -4    3.74    2.25
  -1  33  -4    1.04    2.07
   1  33   4    0.23    1.99
  -1  33  -4   -2.00    2.20
  -2  33  -4    5.67    2.44
   2  33   4    4.78    2.49
  -2  33  -4    7.47    2.74
  -3  33  -4    5.74    2.76
   3  33   4    3.35    2.44
   4  33   4    1.28    2.41
  -4  33  -4   -0.84    2.53
   6 -34  -4   -3.83    3.43
   6  34  -4    3.42    2.54
  -6  34   4   -0.65    2.79
  -5  34   4    2.54    3.11
   5  34  -4    2.34    2.46
   4  34  -4    2.03    2.40
  -4  34   4    0.01    2.98
  -3  34   4   -4.72    2.71
   3  34  -4   -0.29    2.15
  -2  34   4   -0.95    2.61
   2  34  -4    2.15    2.31
   1  34  -4    0.11    2.13
   0  34  -4    5.30    2.39
   0  34   4    6.28    2.43
   0  34  -4    3.50    2.33
   1  34   4    7.19    2.45
  -1  34  -4    6.92    2.58
  -1  34  -4    3.35    2.36
  -2  34  -4    1.58    2.37
  -2  34  -4   -2.89    2.04
   2  34   4   -0.97    2.23
   3  34   4    0.53    2.34
  -3  34  -4    2.97    2.71
  -5  35   4   -1.98    2.88
   5  35  -4   -0.88    2.06
   4  35  -4    1.41    2.43
  -4  35   4   -3.74    2.67
  -3  35   4   -2.04    2.65
   3  35  -4   -0.32    2.23
   2  35  -4   -0.30    2.18
  -2  35   4   -3.89    2.53
   1  35  -4    0.79    2.12
   0  35   4    0.09    2.07
   0  35  -4    2.92    2.29
   0  35  -4   -0.28    2.11
  -1  35  -4   -0.07    2.22
   1  35   4   -0.53    1.97
  -1  35  -4    0.44    2.08
  -2  35  -4   -0.16    2.19
   2  35   4   -0.92    2.18
  -2  35  -4   -2.19    2.27
  -3  35  -4    1.95    2.67
   3  35   4    1.18    2.27
   4  36  -4    5.32    2.69
  -4  36   4    4.27    3.19
  -3  36   4   -3.78    2.62
   3  36  -4    2.57    2.47
   2  36  -4    5.63    2.61
  -2  36   4    1.35    2.73
   1  36  -4   -1.20    2.03
   0  36  -4    5.24    2.51
   0  36   4    3.63    2.32
   0  36  -4    0.34    2.36
   1  36   4    6.91    2.57
  -1  36  -4    4.85    2.44
  -1  36  -4    3.67    2.48
  -2  36  -4   -3.60    2.25
  -2  36  -4    0.06    2.35
   2  36   4   -0.69    2.24
   3  37  -4    7.84    2.88
  -3  37   4    3.58    3.04
   2  37  -4    4.06    2.58
   1  37  -4    0.46    2.14
   0  37   4    2.09    2.21
   0  37  -4    3.27    2.33
   1  37   4   -0.11    2.20
  -1  37  -4    3.64    2.44
  12   0  -5   -1.76    1.97
  11   0  -5    1.16    2.07
  10   0  -5   -2.90    1.70
   9   0  -5   -0.22    1.72
  -9   0   5    0.06    1.94
  -8   0   5    0.05    1.86
   8   0  -5   -1.73    1.21
   7   0  -5   -0.62    1.46
  -7   0   5    0.67    1.89
   6   0  -5   -0.54    0.93
   6   0  -5    1.49    1.37
  -6   0   5    0.19    1.72
   5   0  -5   -0.17    0.92
   5   0  -5   -0.28    1.08
  -5   0   5   -0.24    1.44
  -4   0   5    7.11    1.56
   3   0  -5    0.93    0.82
   3   0  -5    0.39    1.09
   2   0  -5    0.27    0.63
   2   0  -5    0.28    0.98
   1   0  -5   -0.75    0.94
   0   0  -5    0.31    1.09
   1   0   5    0.19    2.03
  -1   0  -5   -0.56    1.07
   1   0   5   -0.48    0.59
  -2   0  -5    7.19    1.50
   2   0   5    1.45    0.85
   2   0   5    2.18    2.17
  -3   0  -5   -1.09    1.24
   3   0   5   -0.44    1.04
   3   0   5    1.09    2.88
   4   0   5    2.82    3.15
  -4   0  -5    1.81    1.46
   4   0   5    0.06    1.20
   5   0   5   -2.18    1.21
   5   0   5    0.37    2.86
  -5   0  -5   -0.61    1.31
   6   0   5   -0.77    2.91
  -6   0  -5    0.82    1.41
   6   0   5    0.34    1.36
   7   0   5   -1.53    3.18
   8   0   5   -5.64    3.00
   9   0   5   -3.99    3.12
  12  -1  -5   -0.37    2.08
  12   1  -5    1.34    2.16
  11  -1  -5   -2.51    1.84
  11   1  -5   -0.51    1.92
  10  -1  -5   -1.19    1.72
  10   1  -5   -1.73    1.76
   9  -1  -5   11.65    2.41
  -9   1   5    9.49    2.31
   9   1  -5    7.33    2.22
  -8  -1   5    3.58    1.88
   8  -1  -5    6.24    1.92
   8   1  -5    4.33    1.82
  -8   1   5    3.45    2.02
   7  -1  -5    1.33    1.61
  -7  -1   5   -1.87    1.90
   7   1  -5    1.55    1.62
  -7   1   5   -1.93    1.84
   7   1  -5    0.55    1.07
   6  -1  -5    4.12    1.03
   6  -1  -5    5.02    1.59
  -6  -1   5    2.35    1.72
   6   1  -5    4.74    1.17
   6   1  -5    4.03    1.54
  -6   1   5    2.78    1.83
  -5  -1   5    0.97    1.40
   5  -1  -5   -1.30    1.17
   5   1  -5    0.16    1.17
   5   1  -5   -0.24    0.97
  -5   1   5   -0.87    1.47
  -4  -1   5   85.28    3.42
   4  -1  -5   89.07    3.50
  -4   1   5   88.99    3.56
   4   1  -5   92.16    3.34
   4   1  -5   92.77    3.51
   3  -1  -5   86.17    3.35
   3  -1  -5   87.23    3.08
   3   1  -5   84.65    3.32
   3   1  -5   86.21    3.04
   2  -1  -5   16.59    1.68
   2   1  -5   11.98    1.52
   2   1  -5   11.05    1.03
   1  -1  -5   46.92    2.39
   1   1  -5   47.94    2.57
   0  -1  -5    2.87    1.07
   0   1  -5    1.11    1.02
   0   1   5    2.16    1.74
  -1  -1  -5   73.41    2.97
   1  -1   5   70.36    2.40
   1   1   5   72.87    4.10
  -1   1  -5   75.00    3.20
  -2  -1  -5  140.91    4.53
   2  -1   5  139.44    3.99
   2  -1   5  142.84    6.31
  -2   1  -5  141.82    4.55
   2   1   5  145.61    6.35
   2   1   5  139.80    3.75
   3  -1   5   31.42    2.37
  -3  -1  -5   29.45    2.49
   3  -1   5   27.05    3.54
   3   1   5   28.25    3.66
  -3   1  -5   35.78    2.66
   3   1   5   32.78    2.18
  -4  -1  -5    0.12    1.42
   4  -1   5    1.96    3.20
   4  -1   5    0.86    1.37
   4   1   5    1.62    1.21
  -4   1  -5    2.94    1.58
   4   1   5    3.58    3.27
   5  -1   5   10.83    3.24
  -5  -1  -5   10.29    1.82
   5  -1   5   10.04    1.75
   5   1   5   11.23    3.25
  -5   1  -5   14.27    2.02
   5   1   5   12.45    1.71
  -6  -1  -5   -0.54    1.35
   6  -1   5   -0.15    1.49
   6  -1   5   -1.86    2.96
   6   1   5   -3.31    2.86
  -6   1  -5   -1.74    1.33
   6   1   5   -0.22    1.35
   7  -1   5   12.47    2.26
   7  -1   5    8.40    3.44
  -7   1  -5    9.59    1.96
   7   1   5    5.80    3.49
   8  -1   5   -4.95    3.24
   8   1   5   -3.23    3.03
   9  -1   5  -10.35    3.17
   9   1   5   -4.03    3.33
  12  -2  -5    5.51    2.53
  12   2  -5    7.57    2.55
  11  -2  -5    3.86    2.26
  11   2  -5    5.14    2.38
  10  -2  -5   47.17    4.31
  10   2  -5   50.79    4.46
   9  -2  -5   12.51    2.45
   9   2  -5   10.03    2.30
  -9   2   5   11.66    2.44
  -8  -2   5   28.56    2.63
   8  -2  -5   21.71    2.66
   8   2  -5   21.95    2.67
  -8   2   5   25.66    2.70
   7  -2  -5   75.95    4.28
  -7  -2   5   69.49    3.60
   7   2  -5   77.46    3.25
   7   2  -5   82.27    4.45
  -7   2   5   72.48    4.19
  -6  -2   5   12.07    2.03
   6  -2  -5   11.33    1.89
  -6   2   5   10.22    2.17
   6   2  -5   14.54    1.54
   6   2  -5   15.21    1.99
  -5  -2   5   54.34    2.91
   5  -2  -5   54.26    3.04
   5   2  -5   51.60    2.56
   5   2  -5   61.05    3.25
  -5   2   5   54.24    3.20
   4  -2  -5  190.69    5.49
  -4  -2   5  189.15    5.23
   4   2  -5  197.23    5.27
   4   2  -5  191.28    5.43
  -4   2   5  182.57    5.38
   4   2  -5  186.34    5.53
   3  -2  -5    1.59    0.88
   3  -2  -5    2.39    1.19
   3   2  -5    2.47    1.12
   3   2  -5    0.64    1.11
   3   2  -5    1.36    0.89
  -3   2   5    1.50    1.29
   2  -2  -5   85.49    3.24
   2  -2  -5   88.72    2.61
   2   2  -5   84.43    2.77
   2   2  -5   86.19    3.25
   1  -2  -5   -0.91    1.05
   1   2  -5   -1.02    0.98
   0  -2  -5   11.41    1.44
   0   2   5   13.55    2.20
   0   2  -5    9.82    1.40
  -1  -2  -5    3.22    1.19
   1  -2   5    0.91    1.03
   1   2   5    2.16    2.08
  -1   2  -5    1.32    1.09
  -2  -2  -5   40.10    2.52
   2  -2   5   33.43    2.31
   2  -2   5   28.68    3.24
  -2   2  -5   33.05    2.54
   2   2   5   39.41    1.72
   2   2   5   34.06    3.46
   3  -2   5    4.87    2.87
  -3  -2  -5    4.03    1.41
   3  -2   5    3.39    1.31
  -3   2  -5    3.03    1.49
   3   2   5    2.75    1.00
   3   2   5    3.66    2.69
   4  -2   5   12.44    3.43
  -4  -2  -5    8.16    1.71
   4  -2   5   10.23    1.71
  -4   2  -5   12.54    1.95
   4   2   5    7.36    3.28
   4   2   5    9.02    1.45
   5  -2   5   37.66    3.03
   5  -2   5   33.28    4.00
  -5  -2  -5   32.05    2.63
   5   2   5   33.04    2.60
  -5   2  -5   29.05    2.60
   5   2   5   29.79    3.89
  -6  -2  -5   14.22    1.99
   6  -2   5   13.77    3.45
   6  -2   5   13.35    2.12
  -6   2  -5   13.91    2.16
   6   2   5   16.55    2.01
   6   2   5   13.91    3.42
   7  -2   5    9.77    2.16
   7  -2   5    5.41    3.34
  -7   2  -5   15.00    2.21
   7   2   5    7.98    3.33
   8  -2   5   22.72    4.17
   8   2   5   17.79    3.86
   9  -2   5   -9.18    3.19
   9   2   5   -3.39    3.13
  12  -3  -5   -1.29    2.10
  12   3  -5   -0.33    2.09
  11  -3  -5    5.10    2.35
  11   3  -5    4.18    2.22
  10  -3  -5    4.15    1.97
  10   3  -5    4.35    2.08
   9  -3  -5    5.59    2.06
   9   3  -5    3.74    1.94
  -9   3   5    5.17    2.27
   8  -3  -5   -0.48    1.51
  -8  -3   5    0.81    1.66
  -8   3   5    0.15    2.03
   8   3  -5   -0.06    1.50
  -7  -3   5   13.00    2.13
   7  -3  -5   13.55    2.03
  -7   3   5   11.27    2.45
   7   3  -5   15.08    1.69
   7   3  -5   11.92    2.11
   6  -3  -5    1.76    1.49
  -6  -3   5   -0.79    1.45
   6   3  -5    1.75    1.43
   6   3  -5    0.02    1.10
  -6   3   5   -1.16    1.84
  -5  -3   5    5.45    1.59
   5  -3  -5    6.77    1.50
   5   3  -5    7.20    1.54
  -5   3   5    7.38    1.92
   5   3  -5    7.30    1.29
   4  -3  -5   23.70    2.05
  -4   3   5   31.07    2.38
   4   3  -5   35.43    2.36
   4   3  -5   29.17    2.19
   4   3  -5   30.43    2.22
   3  -3  -5   30.96    1.98
   3   3  -5   39.94    2.37
   3   3  -5   31.29    2.01
   3   3  -5   32.47    2.20
  -3   3   5   31.99    2.52
   2  -3  -5   -0.51    0.56
   2  -3  -5   -0.32    1.10
   2   3  -5   -0.68    1.01
   2   3  -5   -0.55    0.72
   1  -3  -5   70.35    3.02
  -1   3   5   68.98    3.74
   1   3  -5   62.82    2.75
   0  -3  -5   12.63    1.48
   0   3   5   14.04    2.25
   0   3  -5   14.04    1.64
  -1  -3  -5    1.95    1.14
  -1   3  -5    3.07    1.31
   1   3   5    1.33    2.17
   2  -3   5   33.69    2.59
  -2  -3  -5   31.13    2.37
   2   3   5   31.40    3.39
  -2   3  -5   33.12    2.66
   2   3   5   35.26    1.61
   3  -3   5    7.10    2.68
  -3  -3  -5    7.77    1.59
   3  -3   5   10.31    1.65
   3   3   5    7.50    2.82
  -3   3  -5    9.34    1.83
   3   3   5    6.89    1.12
   4  -3   5    6.56    1.78
   4  -3   5   10.32    3.07
  -4  -3  -5    9.88    1.72
  -4   3  -5    9.44    1.94
   4   3   5    8.42    1.39
   4   3   5    9.48    3.39
   5  -3   5   20.26    3.64
   5  -3   5   20.62    2.29
  -5  -3  -5   18.57    2.04
  -5   3  -5   17.47    2.26
   5   3   5   15.83    3.45
   5   3   5   17.95    1.95
  -6  -3  -5   12.03    1.90
   6  -3   5   12.99    2.18
   6  -3   5   11.52    3.48
   6   3   5   10.64    3.45
   6   3   5   12.62    1.97
  -6   3  -5   14.24    2.18
   7  -3   5   -3.50    2.96
   7  -3   5   -2.06    1.63
  -7   3  -5   -0.25    1.51
   7   3   5   -0.95    2.81
   8  -3   5   -3.95    3.16
   8   3   5   -3.64    3.09
   9   3   5   -3.29    3.28
  12  -4  -5   11.21    2.90
  12   4  -5   11.03    2.89
  11  -4  -5    1.04    2.14
  11   4  -5   -0.72    1.86
  10  -4  -5   11.46    2.57
 -10   4   5    8.53    2.58
  10   4  -5   14.31    2.69
   9  -4  -5    0.58    1.75
   9   4  -5    2.29    1.82
  -9   4   5   -0.29    2.13
  -8  -4   5   10.77    1.92
   8  -4  -5    7.86    1.87
   8   4  -5    6.33    1.92
  -8   4   5    3.97    2.18
   7  -4  -5   10.48    2.09
  -7  -4   5   10.42    1.99
   7   4  -5    9.64    1.58
  -7   4   5   15.17    2.60
   7   4  -5   14.50    2.25
  -6  -4   5    4.48    1.65
   6  -4  -5    5.94    1.67
   6   4  -5    3.37    1.54
  -6   4   5    4.83    2.10
   6   4  -5    6.49    1.39
   5  -4  -5    2.52    1.35
  -5  -4   5    4.04    1.44
   5   4  -5    1.71    1.16
  -5   4   5    3.53    1.85
   5   4  -5    3.70    1.32
   4  -4  -5    3.03    1.17
  -4   4   5    2.70    1.57
   4   4  -5    4.81    1.26
   4   4  -5    4.16    1.18
   4   4  -5    4.32    1.30
   3  -4  -5   33.60    2.08
   3   4  -5   35.97    2.11
  -3   4   5   34.91    2.40
   3   4  -5   39.80    2.53
   3   4  -5   36.21    2.19
   2  -4  -5   91.66    3.38
   2  -4  -5   96.50    2.79
  -2   4   5   96.68    3.64
  -2   4   5   95.85    4.03
   2   4  -5   96.99    3.46
   2   4  -5   96.39    3.72
   2   4  -5   94.14    3.13
   1  -4  -5   13.05    1.61
   1   4  -5   16.35    1.70
  -1   4   5   14.09    2.01
   0  -4  -5  102.04    3.72
   0   4   5  113.35    4.95
   0   4  -5  104.87    3.69
  -1  -4  -5    2.00    1.15
   1   4   5    3.11    2.03
  -1   4  -5    2.46    1.34
  -2  -4  -5    2.08    1.21
   2  -4   5    0.33    1.40
   2   4   5    1.22    0.66
  -2   4  -5    2.15    1.33
   2   4   5    3.63    2.37
   3  -4   5    2.94    1.53
   3  -4   5    6.12    2.84
  -3  -4  -5   -0.99    1.24
   3   4   5    0.88    0.91
   3   4   5    4.84    2.72
  -3   4  -5    1.52    1.52
  -4  -4  -5    0.27    1.31
   4  -4   5    0.29    1.56
   4  -4   5   -1.76    3.00
  -4   4  -5    0.42    1.57
   4   4   5   -0.91    2.74
   4   4   5   -1.49    0.98
   5  -4   5   15.46    3.48
   5  -4   5   15.23    2.17
  -5  -4  -5   16.70    1.92
  -5   4  -5   18.10    2.21
   5   4   5   16.97    1.86
   5   4   5   15.32    3.38
   6  -4   5    7.22    3.27
   6  -4   5    7.98    2.09
   6   4   5    8.96    3.27
  -6   4  -5   13.68    2.13
   7  -4   5   -0.49    1.77
   7  -4   5   -3.01    3.02
  -7   4  -5    0.23    1.64
   7   4   5   -5.89    2.66
   8  -4   5   -1.16    3.53
   8   4   5   -1.24    3.06
   9   4   5   -1.39    3.13
  12  -5  -5   -0.77    2.10
  12   5  -5    1.01    2.20
  11  -5  -5    3.97    2.40
  11   5  -5    4.98    2.40
  10  -5  -5    0.01    1.92
  10   5  -5    0.35    1.83
 -10   5   5   -2.31    2.09
   9  -5  -5   13.58    2.61
   9   5  -5   12.86    2.45
  -9   5   5   15.53    2.75
   8  -5  -5    2.71    1.81
  -8   5   5    2.79    2.13
   8   5  -5    5.31    1.41
   8   5  -5    4.55    1.77
  -7  -5   5   21.98    2.33
   7  -5  -5   20.84    2.55
  -7   5   5   27.90    2.98
   7   5  -5   20.56    2.50
   7   5  -5   20.81    2.03
  -6  -5   5   10.93    1.81
   6  -5  -5   11.38    1.98
  -6   5   5    9.19    2.36
   6   5  -5    8.48    1.52
   6   5  -5    7.38    1.61
  -5  -5   5   24.47    2.08
   5  -5  -5   29.82    2.74
   5   5  -5   27.54    2.50
   5   5  -5   28.15    2.37
  -5   5   5   27.93    2.15
  -5   5   5   26.60    2.66
   4  -5  -5   79.86    3.42
   4   5  -5   79.96    3.33
   4   5  -5   78.81    3.37
   4   5  -5   73.28    3.05
  -4   5   5   79.41    3.13
  -4   5   5   75.36    3.39
   3  -5  -5   68.01    2.79
   3   5  -5   61.72    2.83
   3   5  -5   68.88    2.90
  -3   5   5   67.93    3.26
  -3   5   5   71.66    3.26
   3   5  -5   67.64    3.14
   2  -5  -5   17.49    1.44
   2   5  -5   16.91    1.69
  -2   5   5   15.94    1.74
   2   5  -5   13.34    1.60
  -2   5   5   15.27    1.92
   1  -5  -5  119.15    4.00
   1   5  -5  116.01    3.86
  -1   5   5  118.93    4.71
   0  -5  -5   50.93    2.66
   0   5   5   49.40    3.92
   0   5  -5   44.03    2.70
  -1  -5  -5   81.73    3.25
   1   5   5   79.39    4.90
  -1   5  -5   86.25    3.48
   2  -5   5   97.26    4.06
  -2  -5  -5   89.18    3.47
   2   5   5   98.08    5.22
   2   5   5   95.07    2.72
  -2   5  -5   97.14    4.04
   3  -5   5    4.45    1.69
  -3  -5  -5    2.26    1.32
   3  -5   5    4.56    2.95
   3   5   5    1.51    2.62
   3   5   5    0.94    0.89
  -3   5  -5    1.11    1.57
   4  -5   5   62.57    5.77
  -4  -5  -5   61.18    3.14
   4  -5   5   67.57    3.88
  -4   5  -5   56.88    3.54
   4   5   5   67.84    6.02
   4   5   5   61.88    2.83
   5  -5   5   51.57    4.54
  -5  -5  -5   51.49    2.83
   5  -5   5   51.48    3.74
   5   5   5   48.92    2.79
  -5   5  -5   48.25    3.30
   5   5   5   56.21    4.91
   6  -5   5   -1.14    1.71
   6  -5   5   -1.81    3.11
   6   5   5    0.74    2.93
  -6   5  -5   -0.38    1.57
   7  -5   5    0.97    3.17
   7  -5   5    3.27    2.02
   7   5   5    1.69    2.90
  -7   5  -5   -0.44    1.60
   8  -5   5   -8.80    3.40
   8   5   5   -5.39    2.74
   9   5   5   -0.47    3.32
  12  -6  -5    1.28    2.28
  12   6  -5    4.06    2.42
  11  -6  -5    5.15    2.54
  11   6  -5    5.03    2.30
  10  -6  -5    9.04    2.51
  10   6  -5   10.09    2.42
 -10   6   5   11.62    2.76
   9  -6  -5    2.45    1.81
   9   6  -5    3.53    1.94
  -9   6   5    7.17    2.47
   8  -6  -5    8.69    2.00
   8   6  -5    7.88    1.99
   8   6  -5    7.05    1.60
  -8   6   5    9.17    2.44
  -7  -6   5   16.94    2.01
   7  -6  -5   11.93    2.18
   7   6  -5   13.16    2.18
  -7   6   5   15.47    2.76
   7   6  -5   14.77    1.86
   6  -6  -5   13.73    2.12
  -6  -6   5   18.35    1.93
  -6   6   5   19.28    2.71
   6   6  -5   16.80    1.91
   6   6  -5   16.11    2.14
  -5  -6   5    1.99    1.39
   5  -6  -5    2.17    1.49
  -5   6   5    2.44    1.98
  -5   6   5    2.51    1.07
   5   6  -5    2.49    1.34
   5   6  -5    3.45    1.38
   4  -6  -5   68.48    3.23
   4   6  -5   66.98    3.17
   4   6  -5   65.80    2.88
  -4   6   5   67.18    3.06
  -4   6   5   62.48    3.49
   4   6  -5   71.42    3.28
   3  -6  -5    5.21    1.09
  -3   6   5    4.43    1.47
   3   6  -5    4.66    1.23
   3   6  -5    3.40    1.07
  -3   6   5    5.74    1.55
   3   6  -5    7.33    1.40
   2  -6  -5   17.52    1.55
   2   6  -5   12.64    1.68
  -2   6   5   16.56    2.01
  -2   6   5   17.48    1.83
   2   6  -5   16.45    1.61
   1  -6  -5    0.81    1.17
   1  -6  -5    1.60    0.52
  -1   6   5    2.59    1.83
   1   6  -5    1.37    1.04
   0  -6  -5    3.86    1.20
   0   6  -5    1.33    1.16
   0   6   5    5.76    2.12
  -1  -6  -5   31.56    2.32
  -1   6  -5   30.47    2.64
   1   6   5   29.66    3.07
  -2  -6  -5   33.14    2.29
   2   6   5   32.98    1.60
  -2   6  -5   34.25    2.60
   2   6   5   31.81    3.51
  -3  -6  -5   59.68    3.00
   3  -6   5   63.91    3.78
  -3   6  -5   55.45    3.50
   3   6   5   59.98    2.44
   3   6   5   60.82    5.08
   4  -6   5    5.45    3.17
  -4  -6  -5    6.44    1.50
   4  -6   5    8.80    2.06
   4   6   5   11.53    3.11
  -4   6  -5    7.67    2.02
   4   6   5    7.30    1.31
   5  -6   5    3.56    1.83
   5  -6   5    0.39    2.79
  -5  -6  -5   -1.98    1.12
   5   6   5    0.59    1.06
   5   6   5    2.01    2.84
  -5   6  -5    0.57    1.54
   6  -6   5   -0.68    3.04
   6  -6   5   -0.03    1.83
   6   6   5   -0.20    2.70
  -6   6  -5    1.07    1.70
   7  -6   5    7.22    2.28
   7  -6   5    0.63    3.19
   7   6   5    4.71    3.09
  -7   6  -5    6.55    1.98
   8  -6   5   14.88    4.16
   8  -6   5   16.16    2.85
  -8   6  -5   19.34    2.74
   8   6   5   15.28    3.70
   9   6   5   -5.22    2.84
  12  -7  -5    3.89    2.57
  12   7  -5    9.47    2.79
  11  -7  -5    7.56    2.63
  11   7  -5    9.95    2.65
  10  -7  -5    0.46    1.92
 -10   7   5   -0.10    2.42
  10   7  -5    1.07    1.81
   9  -7  -5    1.77    1.97
  -9   7   5    0.55    2.13
   9   7  -5    3.30    1.92
   8  -7  -5    4.52    1.94
  -8   7   5    4.93    2.38
   8   7  -5    5.24    1.53
   8   7  -5    5.31    1.77
   7  -7  -5    1.06    1.72
  -7  -7   5    0.18    1.54
   7   7  -5   -0.45    1.43
  -7   7   5    1.20    2.26
   7   7  -5    0.91    1.26
  -6  -7   5    1.45    1.40
   6  -7  -5    2.65    1.70
   6   7  -5    1.93    1.51
   6   7  -5    1.61    1.38
  -6   7   5    7.72    2.43
  -5  -7   5   17.42    1.80
   5  -7  -5   13.22    1.93
  -5   7   5   14.23    2.29
   5   7  -5   11.99    1.77
   5   7  -5   15.26    1.69
   5   7  -5    9.70    1.74
   4  -7  -5    6.26    1.40
   4   7  -5    4.70    1.35
   4   7  -5    7.02    1.39
  -4   7   5    4.15    1.36
   4   7  -5    3.75    1.33
  -4   7   5    5.90    1.77
   3  -7  -5   14.02    1.43
   3   7  -5   13.22    1.52
  -3   7   5   13.96    1.78
   3   7  -5   17.03    1.67
   3   7  -5   13.63    1.70
  -3   7   5   14.04    1.83
   2  -7  -5   -0.19    0.82
   2   7  -5    0.15    1.06
  -2   7   5   -0.74    1.57
  -2   7   5   -0.93    1.32
   2   7  -5   -0.70    0.91
   1  -7  -5  144.72    4.32
   1  -7  -5  135.63    3.42
   1   7  -5  142.13    4.88
  -1   7   5  138.11    4.47
  -1   7   5  139.44    5.19
   1   7  -5  139.01    4.35
   0  -7  -5   18.38    1.82
   0   7   5   16.86    2.42
   0   7  -5   15.39    1.84
  -1  -7  -5    0.73    1.19
  -1   7  -5    2.50    1.43
   1   7   5    1.98    2.26
  -2  -7  -5    2.05    1.27
  -2   7  -5    4.01    1.66
   2   7   5    1.10    2.59
  -3  -7  -5    0.85    1.22
   3  -7   5    1.06    2.00
  -3   7  -5   -1.25    1.57
   3   7   5   -1.73    2.45
   3   7   5   -0.29    0.85
  -4  -7  -5   16.24    1.86
   4  -7   5   16.01    2.44
   4  -7   5   15.70    3.42
   4   7   5   14.79    1.58
   4   7   5   14.65    3.41
  -4   7  -5   18.86    2.43
   5  -7   5   -0.40    1.81
  -5  -7  -5    0.93    1.18
   5  -7   5   -2.19    2.69
  -5   7  -5   -0.59    1.57
   5   7   5    0.93    2.83
   5   7   5    0.24    1.03
   6  -7   5    4.53    3.19
   6  -7   5    1.91    1.97
  -6   7  -5    2.24    1.82
   6   7   5    0.83    2.84
   7  -7   5    1.54    1.95
   7  -7   5   -3.34    3.22
  -7   7  -5    2.56    1.95
   7   7   5   -0.59    2.78
   8  -7   5   -0.92    2.10
   8  -7   5   -8.24    3.43
  -8   7  -5   -1.62    1.79
   8   7   5   -1.04    2.86
   9   7   5   -3.67    3.03
  12  -8  -5    2.54    2.44
  12   8  -5    3.57    2.41
  11  -8  -5    3.59    2.28
  11   8  -5    6.23    2.46
  10  -8  -5   24.64    3.30
 -10   8   5   22.55    3.18
  10   8  -5   24.30    3.27
   9  -8  -5   -1.33    1.84
   9   8  -5    1.42    1.76
  -9   8   5   -2.33    2.10
   8  -8  -5   21.34    2.83
   8   8  -5   21.47    2.75
   8   8  -5   21.68    2.32
  -8   8   5   17.18    2.90
   7  -8  -5   47.92    3.85
  -7  -8   5   43.16    2.73
  -7   8   5   33.79    3.20
   7   8  -5   41.54    2.95
   7   8  -5   43.74    3.31
  -6  -8   5   -1.50    1.38
   6  -8  -5    0.05    1.65
   6   8  -5   -1.96    1.29
   6   8  -5   -2.52    1.14
  -6   8   5   -1.12    2.21
   5  -8  -5   50.76    3.40
   5   8  -5   48.65    2.62
   5   8  -5   53.38    3.33
   5   8  -5   56.86    3.26
  -5   8   5   53.25    3.80
   4  -8  -5   56.18    3.03
   4   8  -5   60.20    3.14
  -4   8   5   54.39    3.57
   4   8  -5   58.26    2.88
   4   8  -5   56.22    3.28
  -4   8   5   51.94    2.71
   3  -8  -5    4.85    1.21
  -3   8   5    3.97    1.52
   3   8  -5    3.52    1.18
   3   8  -5    2.26    1.14
  -3   8   5    4.27    1.68
   3   8  -5    4.25    1.26
   2  -8  -5   61.04    2.51
  -2   8   5   58.34    2.93
   2   8  -5   58.10    2.64
  -2   8   5   58.02    3.55
   2   8  -5   57.26    3.20
   1  -8  -5   -1.31    0.78
   1   8  -5   -1.04    1.09
   1   8  -5    1.35    1.34
  -1   8   5   -0.18    1.81
  -1   8   5   -0.14    1.32
   0  -8  -5   14.42    1.70
   0   8   5   13.83    1.78
   0   8  -5   14.74    1.83
   0   8   5   14.85    2.45
  -1  -8  -5    0.40    1.15
   1   8   5    0.54    2.26
  -1   8  -5   -0.05    1.23
  -2  -8  -5    9.34    1.53
   2   8   5   10.88    2.91
  -2   8  -5    8.14    1.80
   3  -8   5    1.73    2.05
  -3  -8  -5    0.73    1.28
   3   8   5    0.01    0.87
  -3   8  -5   -0.22    1.61
   3   8   5    1.18    2.53
   4  -8   5   42.54    4.24
   4  -8   5   46.40    4.01
  -4  -8  -5   42.22    2.59
   4   8   5   44.70    4.39
   4   8   5   43.72    2.47
  -4   8  -5   38.94    3.19
   5  -8   5   13.47    2.47
   5  -8   5   13.66    3.20
   5   8   5   16.79    3.32
  -5   8  -5   19.13    2.45
   6  -8   5   48.90    4.14
   6  -8   5   36.36    4.28
   6   8   5   33.72    4.11
  -6   8  -5   45.02    3.36
   7  -8   5   -3.01    3.24
   7  -8   5    2.37    2.18
   7   8   5    1.82    2.90
  -7   8  -5    0.46    1.76
   8  -8   5    5.62    3.72
   8  -8   5   13.60    2.90
   8   8   5    4.29    3.26
  -8   8  -5   11.59    2.60
   9   8   5    1.82    3.15
  12  -9  -5    1.65    2.42
  12   9  -5   -0.27    2.17
  11  -9  -5    0.19    2.23
 -11   9   5   -3.04    2.60
  11   9  -5   -1.26    1.96
  10  -9  -5    4.41    2.29
 -10   9   5    1.21    2.45
  10   9  -5    2.57    2.08
   9  -9  -5   -0.10    1.91
   9   9  -5    1.42    1.78
  -9   9   5   -0.59    2.23
   8  -9  -5   -0.17    1.84
  -8   9   5   -1.70    2.14
   8   9  -5    0.72    1.33
   8   9  -5   -1.04    1.55
   7  -9  -5   12.30    2.29
   7   9  -5   10.93    2.11
   7   9  -5   10.15    1.82
  -7   9   5   10.71    2.64
  -6  -9   5    1.61    1.43
   6  -9  -5   -0.15    1.70
   6   9  -5   -0.47    1.28
  -6   9   5   -0.59    2.29
   6   9  -5    1.41    1.43
   5  -9  -5   14.40    2.06
   5   9  -5   16.73    2.02
   5   9  -5   16.90    2.13
  -5   9   5   16.15    2.53
   5   9  -5   19.64    1.80
   4  -9  -5   36.96    3.09
   4   9  -5   36.83    2.43
   4   9  -5   40.14    2.79
   4   9  -5   33.68    2.73
  -4   9   5   34.55    2.32
  -4   9   5   33.97    2.91
   3  -9  -5   21.72    1.85
  -3   9   5   23.52    2.01
  -3   9   5   22.54    2.34
   3   9  -5   22.43    1.89
   3   9  -5   23.39    2.19
   3   9  -5   20.90    2.09
   2  -9  -5    4.46    1.19
   2   9  -5    5.11    1.40
  -2   9   5    6.60    1.58
   2   9  -5    6.33    1.36
  -2   9   5    5.67    1.77
   1  -9  -5  101.30    3.18
   1   9  -5   99.73    4.27
   1   9  -5  105.90    3.89
  -1   9   5  100.71    4.61
  -1   9   5  103.79    3.75
   0   9   5    8.21    2.24
   0   9  -5    4.68    1.41
   0   9   5    4.54    1.54
  -1  -9  -5   47.07    2.61
   1   9   5   53.54    4.66
  -1   9  -5   45.35    3.12
  -2  -9  -5   47.54    2.66
   2   9   5   55.39    5.15
  -2   9  -5   49.83    3.15
   3  -9   5    4.17    2.24
  -3  -9  -5    1.36    1.36
   3   9   5    3.09    2.89
   3   9   5    0.43    1.00
  -3   9  -5    0.20    1.66
   4  -9   5   37.64    3.24
  -4  -9  -5   42.31    2.62
   4   9   5   36.51    4.02
   4   9   5   41.56    2.45
  -4   9  -5   44.71    3.32
   5  -9   5   10.64    3.09
   5  -9   5    4.72    2.05
   5   9   5    5.20    2.86
  -5   9  -5    4.31    1.85
   6  -9   5   -2.86    1.92
   6  -9   5   -1.31    3.18
   6   9   5   -2.97    2.67
  -6   9  -5    0.81    1.71
   7  -9   5   -2.81    3.40
   7  -9   5   -0.37    1.98
   7   9   5   -0.68    2.74
  -7   9  -5    3.04    1.91
   8  -9   5    2.32    2.40
   8   9   5    0.77    3.01
  -8   9  -5    2.18    2.06
   9   9   5   -2.73    3.07
  12 -10  -5   -0.46    2.26
  12  10  -5   -1.65    1.95
  11 -10  -5   -0.60    2.25
  11  10  -5    0.48    2.12
 -11  10   5   -2.46    2.51
  10 -10  -5    5.12    2.47
  10  10  -5    4.19    2.20
 -10  10   5    0.94    2.46
   9 -10  -5   -0.38    1.75
  -9  10   5   -5.09    2.11
   9  10  -5    0.02    1.76
   9  10  -5    1.16    1.49
   8 -10  -5    4.17    2.13
   8  10  -5    4.40    1.79
  -8  10   5    5.73    2.49
   8  10  -5    3.48    1.61
   7 -10  -5    1.47    1.82
   7  10  -5    4.56    1.60
   7  10  -5    5.14    1.78
  -7  10   5    9.59    2.67
   6 -10  -5    1.77    1.87
  -6 -10   5    1.00    1.36
  -6  10   5    2.18    2.25
   6  10  -5    2.81    1.51
   6  10  -5    0.49    1.38
   5 -10  -5    1.53    1.67
   5  10  -5    5.05    1.61
   5  10  -5    3.53    1.32
   5  10  -5    0.72    1.39
  -5  10   5    1.79    2.28
   4 -10  -5    1.99    1.58
   4  10  -5    2.25    1.20
  -4  10   5    0.74    1.86
   4  10  -5    2.19    1.37
   4  10  -5    3.26    1.46
  -4  10   5    1.67    1.08
   3 -10  -5    1.22    1.34
   3  10  -5    5.48    1.27
  -3  10   5    2.54    1.48
   3  10  -5    2.59    1.39
  -3  10   5    3.61    1.73
   2 -10  -5   19.25    1.69
  -2  10   5   22.38    2.29
   2  10  -5   17.77    1.81
  -2  10   5   17.77    2.11
   2  10  -5   20.01    2.14
  -1  10   5   39.08    3.47
   1  10  -5   34.44    2.60
  -1  10   5   37.65    2.79
   1  10  -5   37.04    2.97
   0  10  -5   77.77    3.58
   0  10   5   74.65    3.45
   0  10   5   84.79    4.69
  -1 -10  -5   14.34    1.70
   1  10   5   11.50    1.81
   1  10   5   20.36    2.98
  -1  10  -5   14.88    2.07
  -2 -10  -5   14.30    1.74
   2  10   5   14.25    3.11
  -2  10  -5   16.30    2.22
  -3 -10  -5    1.23    1.28
   3  10   5   -1.23    2.75
  -3  10  -5    0.11    1.73
  -4 -10  -5   13.66    1.67
   4 -10   5   11.47    2.40
  -4  10  -5    9.89    2.03
   4  10   5   13.20    1.57
   4  10   5   12.64    2.85
   5 -10   5    4.11    2.80
   5 -10   5   -0.89    2.07
  -5  10  -5    1.97    1.77
   5  10   5    0.01    2.61
   6 -10   5   -4.50    2.98
   6 -10   5   -2.90    1.92
  -6  10  -5   -0.80    1.75
   6  10   5   -0.65    2.70
   7 -10   5   -4.72    2.01
   7 -10   5   -0.12    3.14
  -7  10  -5    1.35    1.93
   7  10   5   -2.04    2.66
   8 -10   5   -3.11    2.01
  -8  10  -5   -0.23    1.94
   8  10   5   -2.40    2.80
   9  10   5   -2.05    2.82
  12 -11  -5   -0.46    2.30
  12  11  -5    6.04    2.57
  11 -11  -5   15.47    3.28
  11  11  -5   12.45    2.91
 -11  11   5   15.74    3.32
  10 -11  -5    0.08    2.15
 -10  11   5   -3.69    2.37
  10  11  -5   -0.40    1.89
   9 -11  -5   21.67    3.04
  -9  11   5   28.56    3.39
   9  11  -5   22.04    2.61
   9  11  -5   21.97    3.04
   8 -11  -5    8.91    2.38
   8  11  -5    9.55    1.98
   8  11  -5    5.98    2.09
  -8  11   5    9.11    2.67
   7 -11  -5    8.29    2.18
  -7  11   5    8.66    2.65
   7  11  -5    8.87    1.86
   7  11  -5    9.97    2.12
   6 -11  -5   24.22    2.71
  -6 -11   5   27.52    2.33
   6  11  -5   21.33    2.53
   6  11  -5   22.98    2.44
  -6  11   5   21.58    3.00
   5 -11  -5    2.54    1.76
  -5  11   5    0.78    2.04
   5  11  -5    1.15    1.46
   5  11  -5    1.71    1.16
   5  11  -5   -1.86    1.31
   4 -11  -5    0.21    1.60
  -4  11   5    0.21    1.87
   4  11  -5    0.16    1.35
   4  11  -5   -1.67    1.28
  -4  11   5    0.54    0.99
   4  11  -5   -0.61    1.11
   3 -11  -5   11.14    1.78
   3  11  -5   12.35    1.59
   3  11  -5   11.10    1.89
  -3  11   5   11.31    2.07
  -3  11   5   14.21    1.69
   2 -11  -5    3.79    1.42
   2  11  -5    0.05    1.36
  -2  11   5    0.40    1.58
  -2  11   5    1.30    1.57
   2  11  -5    0.23    1.15
  -1  11   5   53.41    3.25
  -1  11   5   57.25    3.80
   1  11  -5   55.08    3.46
   1  11  -5   60.42    3.10
   0  11   5    3.56    2.23
   0  11  -5    3.14    1.50
   0  11  -5    1.54    1.45
   0  11   5    2.12    1.56
   1  11   5    6.02    1.67
  -1  11  -5    3.24    1.54
   1  11   5    2.16    2.45
  -2 -11  -5    2.13    1.31
  -2  11  -5    2.18    1.59
   2  11   5    0.95    2.56
   2  11   5    0.41    1.42
  -3 -11  -5   35.83    2.46
   3  11   5   33.28    3.56
  -3  11  -5   31.07    2.86
   4 -11   5   -2.78    2.00
  -4 -11  -5    1.19    1.18
   4  11   5    1.70    2.51
   4  11   5   -1.11    1.00
  -4  11  -5   -1.65    1.47
   5 -11   5    0.56    2.21
   5 -11   5    0.80    2.62
  -5  11  -5    3.61    1.95
   5  11   5    1.60    2.46
   6 -11   5    9.53    2.63
   6 -11   5    9.53    3.44
  -6  11  -5   11.99    2.37
   6  11   5    5.61    2.99
   7 -11   5    2.31    2.36
   7 -11   5   -1.89    3.34
   7  11   5    3.14    2.95
  -7  11  -5    4.07    2.07
   8 -11   5    5.04    2.69
   8  11   5   -0.58    2.83
  -8  11  -5    4.27    2.17
   9  11   5   -2.58    2.88
  -9  11  -5    0.43    2.15
  11 -12  -5   -2.69    2.26
 -11  12   5   -2.17    2.79
  11  12  -5    3.64    2.31
  10 -12  -5    5.93    2.61
  10  12  -5    1.39    2.09
 -10  12   5    1.08    2.66
   9 -12  -5   -2.74    1.90
   9  12  -5    1.45    1.62
   9  12  -5    0.91    1.68
  -9  12   5   -0.70    2.29
   8 -12  -5   18.12    2.83
  -8  12   5   16.87    3.05
   8  12  -5   18.44    2.74
   8  12  -5   18.10    2.44
   7 -12  -5   59.12    4.39
   7  12  -5   57.27    3.66
  -7  12   5   49.02    3.85
   7  12  -5   56.25    4.05
  -6 -12   5   -0.83    1.26
   6 -12  -5    0.56    1.83
  -6  12   5   -0.63    2.48
   6  12  -5    1.16    1.57
   6  12  -5   -1.18    1.33
   5 -12  -5   19.35    2.46
  -5  12   5   18.66    2.90
   5  12  -5   16.60    2.28
   5  12  -5   15.91    2.20
   5  12  -5   18.89    1.82
   4 -12  -5   53.12    3.87
  -4  12   5   50.58    2.39
   4  12  -5   57.33    3.53
  -4  12   5   60.78    3.83
   4  12  -5   57.70    3.51
   4  12  -5   54.67    2.77
   3 -12  -5   39.55    3.21
   3  12  -5   35.01    2.42
  -3  12   5   36.01    2.72
  -3  12   5   34.15    3.02
   3  12  -5   35.47    3.03
   2  12  -5    5.63    1.41
   2  12  -5    3.75    1.59
  -2  12   5    1.50    1.87
  -2  12   5    4.56    1.75
   1  12  -5    2.83    1.33
   1  12  -5    4.43    1.70
  -1  12   5    3.29    1.77
  -1  12   5    4.14    1.97
   0  12  -5   17.25    2.04
   0  12   5   18.09    2.11
   0  12   5   14.37    2.44
   0  12  -5   18.32    2.35
   1  12   5   38.03    3.08
   1  12   5   49.32    4.41
  -1  12  -5   37.36    3.14
   2  12   5    0.87    2.47
  -2  12  -5   -0.55    1.51
   2  12   5    0.67    1.55
   3  12   5    9.72    3.01
  -3  12  -5   10.40    2.09
   3  12   5   14.77    1.92
   4 -12   5    4.03    2.41
  -4  12  -5    3.33    1.75
   4  12   5    1.52    2.54
   5 -12   5   20.47    2.91
   5 -12   5   17.57    3.53
   5  12   5   19.90    3.39
  -5  12  -5   14.83    2.53
   6 -12   5    4.42    2.97
   6 -12   5   -1.37    2.09
  -6  12  -5    2.83    1.97
   6  12   5    0.15    2.73
   7 -12   5   -5.95    3.26
   7 -12   5   -0.14    2.30
   7  12   5    0.76    2.53
  -7  12  -5   -0.32    1.85
   8 -12   5    4.95    2.82
  -8  12  -5   10.18    2.65
   8  12   5    3.41    3.13
   9  12   5    0.42    2.87
  -9  12  -5    1.08    2.23
  11 -13  -5   -1.97    2.32
  11  13  -5    0.38    2.09
 -11  13   5   -5.03    2.54
  10 -13  -5    0.30    2.35
 -10  13   5    1.23    2.65
  10  13  -5    2.80    2.13
   9 -13  -5    6.96    2.56
  -9  13   5    7.22    2.71
   9  13  -5    9.27    2.30
   9  13  -5   11.54    2.30
   8 -13  -5    9.97    2.55
   8  13  -5   15.21    2.34
   8  13  -5   11.17    2.41
  -8  13   5   12.01    2.90
   7 -13  -5    8.43    2.31
   7  13  -5   11.28    2.24
   7  13  -5   12.11    2.04
  -7  13   5   10.09    2.78
   6 -13  -5   59.98    4.41
   6  13  -5   68.07    3.88
   6  13  -5   65.41    4.07
  -6  13   5   64.34    4.56
   5 -13  -5   23.12    2.71
   5  13  -5   19.41    2.43
   5  13  -5   20.38    2.46
   5  13  -5   21.50    1.92
  -5  13   5   22.95    3.19
   4 -13  -5    3.96    2.00
  -4  13   5    6.90    2.48
  -4  13   5    7.99    1.14
   4  13  -5    6.54    1.80
   4  13  -5    6.94    1.42
   3 -13  -5    5.81    1.87
   3  13  -5    5.90    1.40
   3  13  -5    6.54    1.79
  -3  13   5    2.64    2.01
  -3  13   5    6.52    1.55
  -2  13   5   38.83    3.07
   2  13  -5   39.17    2.69
  -2  13   5   38.74    3.27
   2  13  -5   41.51    3.01
   1  13  -5   63.71    3.31
  -1  13   5   56.66    3.85
   1  13  -5   60.69    3.60
  -1  13   5   58.33    3.55
   0  13  -5    3.73    1.77
   0  13   5    5.52    1.83
   0  13   5    6.21    2.26
   0  13  -5    4.03    1.71
   1  13   5   40.91    3.63
  -1  13  -5   42.22    3.32
   1  13   5   47.32    3.19
   2  13   5   40.80    3.83
  -2  13  -5   41.36    3.14
   2  13   5   44.66    3.03
   3  13   5   13.20    2.78
   3  13   5    9.68    1.85
  -3  13  -5   10.63    2.27
   4 -13   5    3.13    2.30
   4  13   5    5.82    2.71
  -4  13  -5   11.58    2.30
   5 -13   5   14.62    2.80
   5 -13   5   20.94    3.62
   5  13   5   13.66    3.24
  -5  13  -5   16.16    2.62
   6 -13   5    7.38    2.62
   6 -13   5    9.16    3.18
[truncated: 309,450 more chars]
