# Supplementary material for: Living Polymerization of Propylene with ansa-Dimethylsilylene(fluorenyl)(cumylamido) Titanium Complexes
Source: Polymers (Basel). 2017 Apr 5;9(4):131. doi: 10.3390/polym9040131 (PMC6432314; doi:10.3390/polym9040131)
Supplement: Supplementary file 1 [file polymers-09-00131-s001.zip › 1b(CCDC 1539499).cif]

data_dm16199
_audit_creation_date              2016-04-15
_audit_creation_method
;
Olex2 1.2
(compiled 2016.02.19 svn.r3266 for OlexSys, GUI svn.r5155)
;
_publ_contact_author_address      ?
_publ_contact_author_email        ?
_publ_contact_author_name         ''
_publ_contact_author_phone        ?
_publ_section_references
;
Dolomanov, O.V., Bourhis, L.J., Gildea, R.J, Howard, J.A.K. & Puschmann, H.
 (2009), J. Appl. Cryst. 42, 339-341.

Sheldrick, G.M. (2008). Acta Cryst. A64, 112-122.

Sheldrick, G.M. (2015). Acta Cryst. C71, 3-8.
;
_chemical_name_common             ?
_chemical_name_systematic         ?
_chemical_formula_moiety          'C34 H47 N Si Ti'
_chemical_formula_sum             'C34 H47 N Si Ti'
_chemical_formula_weight          545.71
_chemical_melting_point           ?
loop_
  _atom_type_symbol
  _atom_type_description
  _atom_type_scat_dispersion_real
  _atom_type_scat_dispersion_imag
  _atom_type_scat_source
 'C' 'C' 0.0033 0.0016 'International Tables Vol C Tables 4.2.6.8 and 6.1.1.4'
 'H' 'H' 0.0000 0.0000 'International Tables Vol C Tables 4.2.6.8 and 6.1.1.4'
 'N' 'N' 0.0061 0.0033 'International Tables Vol C Tables 4.2.6.8 and 6.1.1.4'
 'Si' 'Si' 0.0817 0.0704 'International Tables Vol C Tables 4.2.6.8 and 6.1.1.4'
 'Ti' 'Ti' 0.2776 0.4457 'International Tables Vol C Tables 4.2.6.8 and 6.1.1.4'

_shelx_space_group_comment
;
The symmetry employed for this shelxl refinement is uniquely defined
by the following loop, which should always be used as a source of
symmetry information in preference to the above space-group names.
They are only intended as comments.
;
_space_group_crystal_system       'triclinic'
_space_group_IT_number            2
_space_group_name_H-M_alt         'P -1'
_space_group_name_Hall            '-P 1'
loop_
  _space_group_symop_operation_xyz
 'x, y, z'
 '-x, -y, -z'

_cell_length_a                    10.0609(13)
_cell_length_b                    11.5953(15)
_cell_length_c                    15.491(3)
_cell_angle_alpha                 105.488(3)
_cell_angle_beta                  100.124(3)
_cell_angle_gamma                 110.199(2)
_cell_volume                      1561.1(4)
_cell_formula_units_Z             2
_cell_measurement_reflns_used     4844
_cell_measurement_temperature     130
_cell_measurement_theta_max       30.34
_cell_measurement_theta_min       2.26
_shelx_estimated_absorpt_T_max    0.974
_shelx_estimated_absorpt_T_min    0.936
_exptl_absorpt_coefficient_mu     0.334
_exptl_absorpt_correction_T_max   0.7461
_exptl_absorpt_correction_T_min   0.6822
_exptl_absorpt_correction_type    multi-scan
_exptl_absorpt_process_details
;
SADABS-2008/1 (Bruker,2008) was used for absorption correction.
wR2(int) was 0.0470 before and 0.0326 after correction.
The Ratio of minimum to maximum transmission is 0.9144.
The \l/2 correction factor is 0.0015.
;
_exptl_absorpt_special_details    ?
_exptl_crystal_colour             'orange'
_exptl_crystal_density_diffrn     1.161
_exptl_crystal_density_meas       .
_exptl_crystal_density_method     ?
_exptl_crystal_description        'block'
_exptl_crystal_F_000              588
_exptl_crystal_size_max           0.2
_exptl_crystal_size_mid           0.12
_exptl_crystal_size_min           0.08
_exptl_transmission_factor_max    ?
_exptl_transmission_factor_min    ?
_diffrn_reflns_av_R_equivalents   0.0235
_diffrn_reflns_av_unetI/netI      0.0485
_diffrn_reflns_Laue_measured_fraction_full 0.999
_diffrn_reflns_Laue_measured_fraction_max 0.984
_diffrn_reflns_limit_h_max        14
_diffrn_reflns_limit_h_min        -14
_diffrn_reflns_limit_k_max        16
_diffrn_reflns_limit_k_min        -14
_diffrn_reflns_limit_l_max        22
_diffrn_reflns_limit_l_min        -21
_diffrn_reflns_number             15856
_diffrn_reflns_point_group_measured_fraction_full 0.999
_diffrn_reflns_point_group_measured_fraction_max 0.984
_diffrn_reflns_theta_full         26.000
_diffrn_reflns_theta_max          30.542
_diffrn_reflns_theta_min          2.002
_diffrn_ambient_temperature       130
_diffrn_detector_area_resol_mean  ?
_diffrn_measured_fraction_theta_full 0.999
_diffrn_measured_fraction_theta_max 0.984
_diffrn_measurement_device_type   'Bruker APEX-II CCD'
_diffrn_measurement_method        '\f and \w scans'
_diffrn_radiation_monochromator   'graphite'
_diffrn_radiation_type            MoK\a
_diffrn_radiation_wavelength      0.71073
_diffrn_source                    ?
_diffrn_standards_number          0
_reflns_Friedel_coverage          0.000
_reflns_Friedel_fraction_full     .
_reflns_Friedel_fraction_max      .
_reflns_number_gt                 6998
_reflns_number_total              9413
_reflns_special_details
;
 Reflections were merged by SHELXL according to the crystal
 class for the calculation of statistics and refinement.
 
 _reflns_Friedel_fraction is defined as the number of unique
 Friedel pairs measured divided by the number that would be
 possible theoretically, ignoring centric projections and
 systematic absences.
;
_reflns_threshold_expression      'I > 2\s(I)'
_computing_cell_refinement        'SAINT v7.68A (Bruker, 2009)'
_computing_data_collection        ?
_computing_data_reduction         'SAINT v7.68A (Bruker, 2009)'
_computing_molecular_graphics     'Olex2 (Dolomanov et al., 2009)'
_computing_publication_material   'Olex2 (Dolomanov et al., 2009)'
_computing_structure_refinement   'ShelXL (Sheldrick, 2015)'
_computing_structure_solution     'ShelXS (Sheldrick, 2008)'
_refine_diff_density_max          0.452
_refine_diff_density_min          -0.420
_refine_diff_density_rms          0.056
_refine_ls_extinction_coef        .
_refine_ls_extinction_method      none
_refine_ls_goodness_of_fit_ref    1.017
_refine_ls_hydrogen_treatment     constr
_refine_ls_matrix_type            full
_refine_ls_number_parameters      346
_refine_ls_number_reflns          9413
_refine_ls_number_restraints      0
_refine_ls_R_factor_all           0.0635
_refine_ls_R_factor_gt            0.0398
_refine_ls_restrained_S_all       1.017
_refine_ls_shift/su_max           0.001
_refine_ls_shift/su_mean          0.000
_refine_ls_structure_factor_coef  Fsqd
_refine_ls_weighting_details
'w=1/[\s^2^(Fo^2^)+(0.0494P)^2^+0.2538P] where P=(Fo^2^+2Fc^2^)/3'
_refine_ls_weighting_scheme       calc
_refine_ls_wR_factor_gt           0.0940
_refine_ls_wR_factor_ref          0.1057
_refine_special_details           ?
_olex2_refinement_description
;
1. Fixed Uiso
 At 1.2 times of:
  All C(H) groups
 At 1.5 times of:
  All C(H,H,H) groups
2.a Aromatic/amide H refined with riding coordinates:
 C3(H3), C5(H5), C6(H6), C9(H9), C10(H10), C12(H12), C30(H30), C31(H31),
 C32(H32), C33(H33), C34(H34)
2.b Idealised Me refined as rotating group:
 C15(H15A,H15B,H15C), C16(H16A,H16B,H16C), C17(H17A,H17B,H17C), C19(H19A,H19B,
 H19C), C20(H20A,H20B,H20C), C21(H21A,H21B,H21C), C22(H22A,H22B,H22C), C23(H23A,
 H23B,H23C), C24(H24A,H24B,H24C), C25(H25A,H25B,H25C), C27(H27A,H27B,H27C),
 C28(H28A,H28B,H28C)
;
_atom_sites_solution_hydrogens    geom
_atom_sites_solution_primary      direct
_atom_sites_solution_secondary    ?
loop_
  _atom_site_label
  _atom_site_type_symbol
  _atom_site_fract_x
  _atom_site_fract_y
  _atom_site_fract_z
  _atom_site_U_iso_or_equiv
  _atom_site_adp_type
  _atom_site_occupancy
  _atom_site_site_symmetry_order
  _atom_site_calc_flag
  _atom_site_refinement_flags_posn
  _atom_site_refinement_flags_adp
  _atom_site_refinement_flags_occupancy
  _atom_site_disorder_assembly
  _atom_site_disorder_group
 Ti1 Ti 0.15304(3) 0.18641(2) 0.30027(2) 0.01742(7) Uani 1 1 d . . . . .
 Si1 Si 0.45018(4) 0.32834(4) 0.30923(3) 0.01721(9) Uani 1 1 d . . . . .
 N1 N 0.29624(13) 0.18488(11) 0.23311(9) 0.0190(2) Uani 1 1 d . . . . .
 C1 C 0.34521(15) 0.37938(13) 0.38852(10) 0.0161(3) Uani 1 1 d . . . . .
 C2 C 0.22649(15) 0.41831(13) 0.35968(10) 0.0167(3) Uani 1 1 d . . . . .
 C3 C 0.19790(16) 0.47178(13) 0.28909(10) 0.0188(3) Uani 1 1 d . . . . .
 H3 H 0.2667 0.4931 0.2549 0.023 Uiso 1 1 calc R . . . .
 C4 C 0.07003(16) 0.49270(14) 0.27030(10) 0.0203(3) Uani 1 1 d . . . . .
 C5 C -0.03196(16) 0.46083(15) 0.32251(11) 0.0225(3) Uani 1 1 d . . . . .
 H5 H -0.1179 0.4779 0.3107 0.027 Uiso 1 1 calc R . . . .
 C6 C -0.01021(16) 0.40641(14) 0.38920(10) 0.0211(3) Uani 1 1 d . . . . .
 H6 H -0.0802 0.3855 0.4227 0.025 Uiso 1 1 calc R . . . .
 C7 C 0.11825(15) 0.38192(13) 0.40724(10) 0.0179(3) Uani 1 1 d . . . . .
 C8 C 0.16769(15) 0.32216(13) 0.46896(10) 0.0172(3) Uani 1 1 d . . . . .
 C9 C 0.10344(15) 0.26626(14) 0.53002(10) 0.0193(3) Uani 1 1 d . . . . .
 H9 H 0.0123 0.2674 0.5378 0.023 Uiso 1 1 calc R . . . .
 C10 C 0.17470(16) 0.21019(14) 0.57807(10) 0.0202(3) Uani 1 1 d . . . . .
 H10 H 0.1306 0.1712 0.6184 0.024 Uiso 1 1 calc R . . . .
 C11 C 0.31332(16) 0.20854(13) 0.56935(10) 0.0185(3) Uani 1 1 d . . . . .
 C12 C 0.37898(15) 0.26720(13) 0.51214(10) 0.0181(3) Uani 1 1 d . . . . .
 H12 H 0.4727 0.2694 0.5077 0.022 Uiso 1 1 calc R . . . .
 C13 C 0.30795(15) 0.32435(13) 0.45977(10) 0.0161(3) Uani 1 1 d . . . . .
 C14 C 0.38070(17) 0.13748(14) 0.62165(11) 0.0216(3) Uani 1 1 d . . . . .
 C15 C 0.3977(2) 0.19200(17) 0.72700(11) 0.0302(4) Uani 1 1 d . . . . .
 H15A H 0.4399 0.1450 0.7594 0.045 Uiso 1 1 calc GR . . . .
 H15B H 0.3003 0.1798 0.7358 0.045 Uiso 1 1 calc GR . . . .
 H15C H 0.4637 0.2859 0.7529 0.045 Uiso 1 1 calc GR . . . .
 C16 C 0.53294(17) 0.15100(16) 0.60957(12) 0.0267(3) Uani 1 1 d . . . . .
 H16A H 0.5229 0.1139 0.5428 0.040 Uiso 1 1 calc GR . . . .
 H16B H 0.5715 0.1036 0.6436 0.040 Uiso 1 1 calc GR . . . .
 H16C H 0.6016 0.2441 0.6346 0.040 Uiso 1 1 calc GR . . . .
 C17 C 0.27478(19) -0.00930(15) 0.58244(13) 0.0301(4) Uani 1 1 d . . . . .
 H17A H 0.2646 -0.0461 0.5156 0.045 Uiso 1 1 calc GR . . . .
 H17B H 0.1774 -0.0192 0.5904 0.045 Uiso 1 1 calc GR . . . .
 H17C H 0.3149 -0.0560 0.6163 0.045 Uiso 1 1 calc GR . . . .
 C18 C 0.03013(18) 0.54443(15) 0.19289(11) 0.0239(3) Uani 1 1 d . . . . .
 C19 C -0.0027(2) 0.66438(18) 0.23346(13) 0.0377(4) Uani 1 1 d . . . . .
 H19A H -0.0894 0.6378 0.2562 0.057 Uiso 1 1 calc GR . . . .
 H19B H -0.0228 0.7002 0.1845 0.057 Uiso 1 1 calc GR . . . .
 H19C H 0.0832 0.7317 0.2856 0.057 Uiso 1 1 calc GR . . . .
 C20 C 0.1539(2) 0.58579(19) 0.14819(13) 0.0350(4) Uani 1 1 d . . . . .
 H20A H 0.2428 0.6570 0.1960 0.052 Uiso 1 1 calc GR . . . .
 H20B H 0.1220 0.6163 0.0984 0.052 Uiso 1 1 calc GR . . . .
 H20C H 0.1765 0.5106 0.1215 0.052 Uiso 1 1 calc GR . . . .
 C21 C -0.1093(2) 0.43598(19) 0.11646(13) 0.0369(4) Uani 1 1 d . . . . .
 H21A H -0.0872 0.3616 0.0868 0.055 Uiso 1 1 calc GR . . . .
 H21B H -0.1409 0.4704 0.0691 0.055 Uiso 1 1 calc GR . . . .
 H21C H -0.1888 0.4067 0.1446 0.055 Uiso 1 1 calc GR . . . .
 C22 C 0.10845(19) 0.01753(15) 0.33646(12) 0.0276(3) Uani 1 1 d . . . . .
 H22A H 0.1949 -0.0039 0.3414 0.041 Uiso 1 1 calc GR . . . .
 H22B H 0.0225 -0.0562 0.2880 0.041 Uiso 1 1 calc GR . . . .
 H22C H 0.0872 0.0340 0.3968 0.041 Uiso 1 1 calc GR . . . .
 C23 C -0.05906(18) 0.13950(17) 0.21346(13) 0.0312(4) Uani 1 1 d . . . . .
 H23A H -0.0574 0.2141 0.1946 0.047 Uiso 1 1 calc GR . . . .
 H23B H -0.1319 0.1203 0.2479 0.047 Uiso 1 1 calc GR . . . .
 H23C H -0.0863 0.0623 0.1575 0.047 Uiso 1 1 calc GR . . . .
 C24 C 0.60312(17) 0.29720(17) 0.37202(12) 0.0266(3) Uani 1 1 d . . . . .
 H24A H 0.6642 0.3733 0.4294 0.040 Uiso 1 1 calc GR . . . .
 H24B H 0.6646 0.2830 0.3313 0.040 Uiso 1 1 calc GR . . . .
 H24C H 0.5608 0.2190 0.3883 0.040 Uiso 1 1 calc GR . . . .
 C25 C 0.53610(17) 0.44765(15) 0.25366(11) 0.0246(3) Uani 1 1 d . . . . .
 H25A H 0.5887 0.4126 0.2136 0.037 Uiso 1 1 calc GR . . . .
 H25B H 0.6062 0.5314 0.3026 0.037 Uiso 1 1 calc GR . . . .
 H25C H 0.4585 0.4617 0.2156 0.037 Uiso 1 1 calc GR . . . .
 C26 C 0.29529(18) 0.09288(15) 0.14492(11) 0.0248(3) Uani 1 1 d . . . . .
 C27 C 0.4122(2) 0.0392(2) 0.16788(14) 0.0436(5) Uani 1 1 d . . . . .
 H27A H 0.5111 0.1119 0.1941 0.065 Uiso 1 1 calc GR . . . .
 H27B H 0.4084 -0.0249 0.1104 0.065 Uiso 1 1 calc GR . . . .
 H27C H 0.3916 -0.0034 0.2137 0.065 Uiso 1 1 calc GR . . . .
 C28 C 0.1440(2) -0.02428(17) 0.09938(13) 0.0376(4) Uani 1 1 d . . . . .
 H28A H 0.1250 -0.0740 0.1414 0.056 Uiso 1 1 calc GR . . . .
 H28B H 0.1436 -0.0814 0.0398 0.056 Uiso 1 1 calc GR . . . .
 H28C H 0.0665 0.0075 0.0877 0.056 Uiso 1 1 calc GR . . . .
 C29 C 0.32473(19) 0.16691(16) 0.07694(11) 0.0282(3) Uani 1 1 d . . . . .
 C30 C 0.2329(2) 0.22869(18) 0.05537(13) 0.0370(4) Uani 1 1 d . . . . .
 H30 H 0.1532 0.2221 0.0816 0.044 Uiso 1 1 calc R . . . .
 C31 C 0.2573(3) 0.2997(2) -0.00405(14) 0.0554(6) Uani 1 1 d . . . . .
 H31 H 0.1934 0.3405 -0.0186 0.066 Uiso 1 1 calc R . . . .
 C32 C 0.3729(4) 0.3115(2) -0.04197(16) 0.0689(8) Uani 1 1 d . . . . .
 H32 H 0.3904 0.3618 -0.0814 0.083 Uiso 1 1 calc R . . . .
 C33 C 0.4631(3) 0.2501(2) -0.02235(16) 0.0615(7) Uani 1 1 d . . . . .
 H33 H 0.5422 0.2572 -0.0492 0.074 Uiso 1 1 calc R . . . .
 C34 C 0.4399(2) 0.1772(2) 0.03671(14) 0.0428(5) Uani 1 1 d . . . . .
 H34 H 0.5026 0.1346 0.0494 0.051 Uiso 1 1 calc R . . . .

loop_
  _atom_site_aniso_label
  _atom_site_aniso_U_11
  _atom_site_aniso_U_22
  _atom_site_aniso_U_33
  _atom_site_aniso_U_23
  _atom_site_aniso_U_13
  _atom_site_aniso_U_12
 Ti1 0.01544(12) 0.01603(12) 0.01877(13) 0.00560(10) 0.00455(10) 0.00489(9)
 Si1 0.01524(18) 0.01847(18) 0.0195(2) 0.00765(16) 0.00688(15) 0.00727(15)
 N1 0.0201(6) 0.0179(6) 0.0176(6) 0.0051(5) 0.0053(5) 0.0072(5)
 C1 0.0148(6) 0.0162(6) 0.0174(6) 0.0065(5) 0.0047(5) 0.0061(5)
 C2 0.0158(6) 0.0159(6) 0.0170(6) 0.0047(5) 0.0043(5) 0.0063(5)
 C3 0.0210(7) 0.0178(6) 0.0187(7) 0.0072(5) 0.0067(6) 0.0082(5)
 C4 0.0234(7) 0.0198(7) 0.0188(7) 0.0067(6) 0.0044(6) 0.0110(6)
 C5 0.0209(7) 0.0272(7) 0.0237(7) 0.0091(6) 0.0064(6) 0.0147(6)
 C6 0.0179(7) 0.0252(7) 0.0212(7) 0.0076(6) 0.0066(6) 0.0103(6)
 C7 0.0172(6) 0.0188(6) 0.0172(7) 0.0058(5) 0.0050(5) 0.0075(5)
 C8 0.0160(6) 0.0172(6) 0.0173(7) 0.0053(5) 0.0044(5) 0.0064(5)
 C9 0.0172(6) 0.0202(7) 0.0200(7) 0.0060(6) 0.0076(5) 0.0072(5)
 C10 0.0228(7) 0.0191(7) 0.0193(7) 0.0078(6) 0.0088(6) 0.0073(6)
 C11 0.0207(7) 0.0169(6) 0.0166(7) 0.0056(5) 0.0044(5) 0.0072(5)
 C12 0.0174(6) 0.0187(6) 0.0181(7) 0.0056(5) 0.0051(5) 0.0078(5)
 C13 0.0155(6) 0.0149(6) 0.0166(6) 0.0048(5) 0.0045(5) 0.0055(5)
 C14 0.0256(7) 0.0217(7) 0.0210(7) 0.0101(6) 0.0069(6) 0.0120(6)
 C15 0.0395(9) 0.0353(9) 0.0237(8) 0.0143(7) 0.0103(7) 0.0209(8)
 C16 0.0262(8) 0.0287(8) 0.0305(9) 0.0140(7) 0.0070(7) 0.0154(6)
 C17 0.0325(9) 0.0228(8) 0.0383(10) 0.0145(7) 0.0110(7) 0.0122(7)
 C18 0.0305(8) 0.0271(7) 0.0199(7) 0.0102(6) 0.0070(6) 0.0174(6)
 C19 0.0624(13) 0.0371(10) 0.0311(9) 0.0170(8) 0.0161(9) 0.0357(10)
 C20 0.0406(10) 0.0484(10) 0.0309(9) 0.0252(8) 0.0143(8) 0.0253(9)
 C21 0.0404(10) 0.0406(10) 0.0250(9) 0.0114(8) 0.0003(8) 0.0159(8)
 C22 0.0329(8) 0.0193(7) 0.0282(8) 0.0084(6) 0.0110(7) 0.0070(6)
 C23 0.0226(8) 0.0278(8) 0.0329(9) 0.0039(7) -0.0005(7) 0.0082(6)
 C24 0.0218(7) 0.0354(8) 0.0278(8) 0.0117(7) 0.0101(6) 0.0160(7)
 C25 0.0242(7) 0.0236(7) 0.0272(8) 0.0106(6) 0.0124(6) 0.0079(6)
 C26 0.0307(8) 0.0228(7) 0.0203(7) 0.0045(6) 0.0088(6) 0.0121(6)
 C27 0.0652(13) 0.0453(11) 0.0333(10) 0.0086(9) 0.0156(10) 0.0413(11)
 C28 0.0470(11) 0.0227(8) 0.0275(9) -0.0004(7) 0.0118(8) 0.0034(7)
 C29 0.0342(9) 0.0271(8) 0.0174(7) 0.0039(6) 0.0082(6) 0.0086(7)
 C30 0.0490(11) 0.0365(10) 0.0232(8) 0.0109(8) 0.0057(8) 0.0172(8)
 C31 0.0966(19) 0.0415(11) 0.0237(10) 0.0119(9) 0.0063(11) 0.0289(12)
 C32 0.127(3) 0.0429(12) 0.0300(11) 0.0167(10) 0.0338(14) 0.0191(15)
 C33 0.0811(18) 0.0549(14) 0.0365(12) 0.0110(11) 0.0378(12) 0.0085(13)
 C34 0.0496(12) 0.0426(11) 0.0304(10) 0.0052(8) 0.0209(9) 0.0140(9)

_geom_special_details
;
 All esds (except the esd in the dihedral angle between two l.s. planes)
 are estimated using the full covariance matrix.  The cell esds are taken
 into account individually in the estimation of esds in distances, angles
 and torsion angles; correlations between esds in cell parameters are only
 used when they are defined by crystal symmetry.  An approximate (isotropic)
 treatment of cell esds is used for estimating esds involving l.s. planes.
;
loop_
  _geom_bond_atom_site_label_1
  _geom_bond_atom_site_label_2
  _geom_bond_distance
  _geom_bond_site_symmetry_2
  _geom_bond_publ_flag
 Ti1 Si1 2.8283(6) . ?
 Ti1 N1 1.9218(12) . ?
 Ti1 C1 2.2502(14) . ?
 Ti1 C2 2.3854(14) . ?
 Ti1 C7 2.5987(14) . ?
 Ti1 C8 2.6145(15) . ?
 Ti1 C13 2.4304(15) . ?
 Ti1 C22 2.1019(15) . ?
 Ti1 C23 2.1111(16) . ?
 Si1 N1 1.7571(13) . ?
 Si1 C1 1.8638(14) . ?
 Si1 C24 1.8680(15) . ?
 Si1 C25 1.8639(15) . ?
 N1 C26 1.4881(19) . ?
 C1 C2 1.4568(18) . ?
 C1 C13 1.4568(18) . ?
 C2 C3 1.4275(19) . ?
 C2 C7 1.4275(19) . ?
 C3 H3 0.9500 . ?
 C3 C4 1.3857(19) . ?
 C4 C5 1.426(2) . ?
 C4 C18 1.530(2) . ?
 C5 H5 0.9500 . ?
 C5 C6 1.370(2) . ?
 C6 H6 0.9500 . ?
 C6 C7 1.4135(19) . ?
 C7 C8 1.4375(19) . ?
 C8 C9 1.4092(19) . ?
 C8 C13 1.4353(18) . ?
 C9 H9 0.9500 . ?
 C9 C10 1.3725(19) . ?
 C10 H10 0.9500 . ?
 C10 C11 1.4307(19) . ?
 C11 C12 1.3792(19) . ?
 C11 C14 1.5310(19) . ?
 C12 H12 0.9500 . ?
 C12 C13 1.4206(18) . ?
 C14 C15 1.539(2) . ?
 C14 C16 1.535(2) . ?
 C14 C17 1.539(2) . ?
 C15 H15A 0.9800 . ?
 C15 H15B 0.9800 . ?
 C15 H15C 0.9800 . ?
 C16 H16A 0.9800 . ?
 C16 H16B 0.9800 . ?
 C16 H16C 0.9800 . ?
 C17 H17A 0.9800 . ?
 C17 H17B 0.9800 . ?
 C17 H17C 0.9800 . ?
 C18 C19 1.537(2) . ?
 C18 C20 1.526(2) . ?
 C18 C21 1.534(2) . ?
 C19 H19A 0.9800 . ?
 C19 H19B 0.9800 . ?
 C19 H19C 0.9800 . ?
 C20 H20A 0.9800 . ?
 C20 H20B 0.9800 . ?
 C20 H20C 0.9800 . ?
 C21 H21A 0.9800 . ?
 C21 H21B 0.9800 . ?
 C21 H21C 0.9800 . ?
 C22 H22A 0.9800 . ?
 C22 H22B 0.9800 . ?
 C22 H22C 0.9800 . ?
 C23 H23A 0.9800 . ?
 C23 H23B 0.9800 . ?
 C23 H23C 0.9800 . ?
 C24 H24A 0.9800 . ?
 C24 H24B 0.9800 . ?
 C24 H24C 0.9800 . ?
 C25 H25A 0.9800 . ?
 C25 H25B 0.9800 . ?
 C25 H25C 0.9800 . ?
 C26 C27 1.541(2) . ?
 C26 C28 1.531(2) . ?
 C26 C29 1.533(2) . ?
 C27 H27A 0.9800 . ?
 C27 H27B 0.9800 . ?
 C27 H27C 0.9800 . ?
 C28 H28A 0.9800 . ?
 C28 H28B 0.9800 . ?
 C28 H28C 0.9800 . ?
 C29 C30 1.398(2) . ?
 C29 C34 1.394(2) . ?
 C30 H30 0.9500 . ?
 C30 C31 1.389(3) . ?
 C31 H31 0.9500 . ?
 C31 C32 1.375(4) . ?
 C32 H32 0.9500 . ?
 C32 C33 1.374(4) . ?
 C33 H33 0.9500 . ?
 C33 C34 1.399(3) . ?
 C34 H34 0.9500 . ?

loop_
  _geom_angle_atom_site_label_1
  _geom_angle_atom_site_label_2
  _geom_angle_atom_site_label_3
  _geom_angle
  _geom_angle_site_symmetry_1
  _geom_angle_site_symmetry_3
  _geom_angle_publ_flag
 N1 Ti1 Si1 37.67(4) . . ?
 N1 Ti1 C1 78.56(5) . . ?
 N1 Ti1 C2 97.77(5) . . ?
 N1 Ti1 C7 130.51(5) . . ?
 N1 Ti1 C8 134.18(5) . . ?
 N1 Ti1 C13 102.67(5) . . ?
 N1 Ti1 C22 104.17(6) . . ?
 N1 Ti1 C23 113.46(6) . . ?
 C1 Ti1 Si1 41.12(3) . . ?
 C1 Ti1 C2 36.48(5) . . ?
 C1 Ti1 C7 57.73(5) . . ?
 C1 Ti1 C8 57.56(5) . . ?
 C1 Ti1 C13 36.01(4) . . ?
 C2 Ti1 Si1 67.69(3) . . ?
 C2 Ti1 C7 32.93(4) . . ?
 C2 Ti1 C8 54.96(4) . . ?
 C2 Ti1 C13 57.31(4) . . ?
 C7 Ti1 Si1 97.04(3) . . ?
 C7 Ti1 C8 32.01(4) . . ?
 C8 Ti1 Si1 96.98(3) . . ?
 C13 Ti1 Si1 67.63(3) . . ?
 C13 Ti1 C7 54.78(4) . . ?
 C13 Ti1 C8 32.80(4) . . ?
 C22 Ti1 Si1 116.66(5) . . ?
 C22 Ti1 C1 122.36(6) . . ?
 C22 Ti1 C2 144.59(6) . . ?
 C22 Ti1 C7 117.79(6) . . ?
 C22 Ti1 C8 90.18(6) . . ?
 C22 Ti1 C13 90.57(6) . . ?
 C22 Ti1 C23 100.07(7) . . ?
 C23 Ti1 Si1 136.31(5) . . ?
 C23 Ti1 C1 132.31(6) . . ?
 C23 Ti1 C2 96.13(6) . . ?
 C23 Ti1 C7 84.95(6) . . ?
 C23 Ti1 C8 106.18(6) . . ?
 C23 Ti1 C13 138.10(6) . . ?
 N1 Si1 Ti1 41.94(4) . . ?
 N1 Si1 C1 94.20(6) . . ?
 N1 Si1 C24 114.03(7) . . ?
 N1 Si1 C25 115.13(7) . . ?
 C1 Si1 Ti1 52.56(4) . . ?
 C1 Si1 C24 111.52(7) . . ?
 C24 Si1 Ti1 120.44(5) . . ?
 C25 Si1 Ti1 132.78(5) . . ?
 C25 Si1 C1 115.36(6) . . ?
 C25 Si1 C24 106.54(7) . . ?
 Si1 N1 Ti1 100.40(6) . . ?
 C26 N1 Ti1 134.33(10) . . ?
 C26 N1 Si1 125.21(10) . . ?
 Si1 C1 Ti1 86.32(6) . . ?
 C2 C1 Ti1 76.82(8) . . ?
 C2 C1 Si1 123.17(10) . . ?
 C2 C1 C13 104.89(11) . . ?
 C13 C1 Ti1 78.75(8) . . ?
 C13 C1 Si1 124.52(10) . . ?
 C1 C2 Ti1 66.70(7) . . ?
 C3 C2 Ti1 113.88(9) . . ?
 C3 C2 C1 131.07(12) . . ?
 C7 C2 Ti1 81.77(8) . . ?
 C7 C2 C1 109.87(12) . . ?
 C7 C2 C3 118.75(12) . . ?
 C2 C3 H3 119.9 . . ?
 C4 C3 C2 120.21(13) . . ?
 C4 C3 H3 119.9 . . ?
 C3 C4 C5 119.27(13) . . ?
 C3 C4 C18 122.65(13) . . ?
 C5 C4 C18 118.04(12) . . ?
 C4 C5 H5 118.9 . . ?
 C6 C5 C4 122.23(13) . . ?
 C6 C5 H5 118.9 . . ?
 C5 C6 H6 120.6 . . ?
 C5 C6 C7 118.83(13) . . ?
 C7 C6 H6 120.6 . . ?
 C2 C7 Ti1 65.30(7) . . ?
 C2 C7 C8 107.87(12) . . ?
 C6 C7 Ti1 124.52(10) . . ?
 C6 C7 C2 120.59(12) . . ?
 C6 C7 C8 131.54(13) . . ?
 C8 C7 Ti1 74.60(8) . . ?
 C7 C8 Ti1 73.39(8) . . ?
 C9 C8 Ti1 124.14(10) . . ?
 C9 C8 C7 131.99(13) . . ?
 C9 C8 C13 120.40(12) . . ?
 C13 C8 Ti1 66.53(8) . . ?
 C13 C8 C7 107.61(12) . . ?
 C8 C9 H9 120.5 . . ?
 C10 C9 C8 118.94(13) . . ?
 C10 C9 H9 120.5 . . ?
 C9 C10 H10 118.9 . . ?
 C9 C10 C11 122.13(13) . . ?
 C11 C10 H10 118.9 . . ?
 C10 C11 C14 118.49(12) . . ?
 C12 C11 C10 119.04(12) . . ?
 C12 C11 C14 122.44(13) . . ?
 C11 C12 H12 119.6 . . ?
 C11 C12 C13 120.74(13) . . ?
 C13 C12 H12 119.6 . . ?
 C1 C13 Ti1 65.24(7) . . ?
 C8 C13 Ti1 80.67(8) . . ?
 C8 C13 C1 109.64(11) . . ?
 C12 C13 Ti1 117.20(9) . . ?
 C12 C13 C1 131.47(12) . . ?
 C12 C13 C8 118.68(12) . . ?
 C11 C14 C15 110.40(12) . . ?
 C11 C14 C16 112.14(12) . . ?
 C11 C14 C17 108.34(12) . . ?
 C15 C14 C17 108.41(13) . . ?
 C16 C14 C15 108.73(13) . . ?
 C16 C14 C17 108.73(12) . . ?
 C14 C15 H15A 109.5 . . ?
 C14 C15 H15B 109.5 . . ?
 C14 C15 H15C 109.5 . . ?
 H15A C15 H15B 109.5 . . ?
 H15A C15 H15C 109.5 . . ?
 H15B C15 H15C 109.5 . . ?
 C14 C16 H16A 109.5 . . ?
 C14 C16 H16B 109.5 . . ?
 C14 C16 H16C 109.5 . . ?
 H16A C16 H16B 109.5 . . ?
 H16A C16 H16C 109.5 . . ?
 H16B C16 H16C 109.5 . . ?
 C14 C17 H17A 109.5 . . ?
 C14 C17 H17B 109.5 . . ?
 C14 C17 H17C 109.5 . . ?
 H17A C17 H17B 109.5 . . ?
 H17A C17 H17C 109.5 . . ?
 H17B C17 H17C 109.5 . . ?
 C4 C18 C19 109.74(13) . . ?
 C4 C18 C21 108.70(13) . . ?
 C20 C18 C4 112.80(12) . . ?
 C20 C18 C19 107.99(14) . . ?
 C20 C18 C21 108.68(14) . . ?
 C21 C18 C19 108.86(14) . . ?
 C18 C19 H19A 109.5 . . ?
 C18 C19 H19B 109.5 . . ?
 C18 C19 H19C 109.5 . . ?
 H19A C19 H19B 109.5 . . ?
 H19A C19 H19C 109.5 . . ?
 H19B C19 H19C 109.5 . . ?
 C18 C20 H20A 109.5 . . ?
 C18 C20 H20B 109.5 . . ?
 C18 C20 H20C 109.5 . . ?
 H20A C20 H20B 109.5 . . ?
 H20A C20 H20C 109.5 . . ?
 H20B C20 H20C 109.5 . . ?
 C18 C21 H21A 109.5 . . ?
 C18 C21 H21B 109.5 . . ?
 C18 C21 H21C 109.5 . . ?
 H21A C21 H21B 109.5 . . ?
 H21A C21 H21C 109.5 . . ?
 H21B C21 H21C 109.5 . . ?
 Ti1 C22 H22A 109.5 . . ?
 Ti1 C22 H22B 109.5 . . ?
 Ti1 C22 H22C 109.5 . . ?
 H22A C22 H22B 109.5 . . ?
 H22A C22 H22C 109.5 . . ?
 H22B C22 H22C 109.5 . . ?
 Ti1 C23 H23A 109.5 . . ?
 Ti1 C23 H23B 109.5 . . ?
 Ti1 C23 H23C 109.5 . . ?
 H23A C23 H23B 109.5 . . ?
 H23A C23 H23C 109.5 . . ?
 H23B C23 H23C 109.5 . . ?
 Si1 C24 H24A 109.5 . . ?
 Si1 C24 H24B 109.5 . . ?
 Si1 C24 H24C 109.5 . . ?
 H24A C24 H24B 109.5 . . ?
 H24A C24 H24C 109.5 . . ?
 H24B C24 H24C 109.5 . . ?
 Si1 C25 H25A 109.5 . . ?
 Si1 C25 H25B 109.5 . . ?
 Si1 C25 H25C 109.5 . . ?
 H25A C25 H25B 109.5 . . ?
 H25A C25 H25C 109.5 . . ?
 H25B C25 H25C 109.5 . . ?
 N1 C26 C27 109.23(13) . . ?
 N1 C26 C28 110.54(13) . . ?
 N1 C26 C29 108.26(12) . . ?
 C28 C26 C27 107.75(15) . . ?
 C28 C26 C29 108.62(13) . . ?
 C29 C26 C27 112.46(14) . . ?
 C26 C27 H27A 109.5 . . ?
 C26 C27 H27B 109.5 . . ?
 C26 C27 H27C 109.5 . . ?
 H27A C27 H27B 109.5 . . ?
 H27A C27 H27C 109.5 . . ?
 H27B C27 H27C 109.5 . . ?
 C26 C28 H28A 109.5 . . ?
 C26 C28 H28B 109.5 . . ?
 C26 C28 H28C 109.5 . . ?
 H28A C28 H28B 109.5 . . ?
 H28A C28 H28C 109.5 . . ?
 H28B C28 H28C 109.5 . . ?
 C30 C29 C26 118.37(15) . . ?
 C34 C29 C26 123.16(16) . . ?
 C34 C29 C30 118.47(17) . . ?
 C29 C30 H30 119.7 . . ?
 C31 C30 C29 120.6(2) . . ?
 C31 C30 H30 119.7 . . ?
 C30 C31 H31 119.7 . . ?
 C32 C31 C30 120.6(2) . . ?
 C32 C31 H31 119.7 . . ?
 C31 C32 H32 120.2 . . ?
 C33 C32 C31 119.5(2) . . ?
 C33 C32 H32 120.2 . . ?
 C32 C33 H33 119.6 . . ?
 C32 C33 C34 120.8(2) . . ?
 C34 C33 H33 119.6 . . ?
 C29 C34 C33 120.0(2) . . ?
 C29 C34 H34 120.0 . . ?
 C33 C34 H34 120.0 . . ?

loop_
  _geom_torsion_atom_site_label_1
  _geom_torsion_atom_site_label_2
  _geom_torsion_atom_site_label_3
  _geom_torsion_atom_site_label_4
  _geom_torsion
  _geom_torsion_site_symmetry_1
  _geom_torsion_site_symmetry_2
  _geom_torsion_site_symmetry_3
  _geom_torsion_site_symmetry_4
  _geom_torsion_publ_flag
 Ti1 Si1 N1 C26 -177.51(14) . . . . ?
 Ti1 Si1 C1 C2 -71.64(11) . . . . ?
 Ti1 Si1 C1 C13 73.66(11) . . . . ?
 Ti1 N1 C26 C27 -117.56(15) . . . . ?
 Ti1 N1 C26 C28 0.8(2) . . . . ?
 Ti1 N1 C26 C29 119.69(13) . . . . ?
 Ti1 C1 C2 C3 -102.09(15) . . . . ?
 Ti1 C1 C2 C7 71.26(10) . . . . ?
 Ti1 C1 C13 C8 -69.25(10) . . . . ?
 Ti1 C1 C13 C12 105.32(15) . . . . ?
 Ti1 C2 C3 C4 96.33(14) . . . . ?
 Ti1 C2 C7 C6 -116.92(13) . . . . ?
 Ti1 C2 C7 C8 62.91(10) . . . . ?
 Ti1 C7 C8 C9 -121.30(16) . . . . ?
 Ti1 C7 C8 C13 57.95(9) . . . . ?
 Ti1 C8 C9 C10 78.65(16) . . . . ?
 Ti1 C8 C13 C1 59.38(9) . . . . ?
 Ti1 C8 C13 C12 -115.99(12) . . . . ?
 Si1 N1 C26 C27 59.02(17) . . . . ?
 Si1 N1 C26 C28 177.41(11) . . . . ?
 Si1 N1 C26 C29 -63.73(16) . . . . ?
 Si1 C1 C2 Ti1 76.60(9) . . . . ?
 Si1 C1 C2 C3 -25.5(2) . . . . ?
 Si1 C1 C2 C7 147.85(11) . . . . ?
 Si1 C1 C13 Ti1 -77.52(10) . . . . ?
 Si1 C1 C13 C8 -146.77(11) . . . . ?
 Si1 C1 C13 C12 27.8(2) . . . . ?
 N1 Si1 C1 Ti1 5.32(5) . . . . ?
 N1 Si1 C1 C2 -66.32(12) . . . . ?
 N1 Si1 C1 C13 78.97(12) . . . . ?
 N1 C26 C29 C30 -54.78(19) . . . . ?
 N1 C26 C29 C34 124.25(17) . . . . ?
 C1 Si1 N1 Ti1 -6.32(6) . . . . ?
 C1 Si1 N1 C26 176.16(12) . . . . ?
 C1 C2 C3 C4 175.50(14) . . . . ?
 C1 C2 C7 Ti1 -61.50(9) . . . . ?
 C1 C2 C7 C6 -178.41(13) . . . . ?
 C1 C2 C7 C8 1.41(16) . . . . ?
 C2 C1 C13 Ti1 72.93(9) . . . . ?
 C2 C1 C13 C8 3.68(15) . . . . ?
 C2 C1 C13 C12 178.26(14) . . . . ?
 C2 C3 C4 C5 0.3(2) . . . . ?
 C2 C3 C4 C18 -177.45(13) . . . . ?
 C2 C7 C8 Ti1 -57.03(10) . . . . ?
 C2 C7 C8 C9 -178.32(15) . . . . ?
 C2 C7 C8 C13 0.93(16) . . . . ?
 C3 C2 C7 Ti1 112.78(13) . . . . ?
 C3 C2 C7 C6 -4.1(2) . . . . ?
 C3 C2 C7 C8 175.69(12) . . . . ?
 C3 C4 C5 C6 -1.9(2) . . . . ?
 C3 C4 C18 C19 -127.59(16) . . . . ?
 C3 C4 C18 C20 -7.1(2) . . . . ?
 C3 C4 C18 C21 113.46(16) . . . . ?
 C4 C5 C6 C7 0.5(2) . . . . ?
 C5 C4 C18 C19 54.63(19) . . . . ?
 C5 C4 C18 C20 175.07(14) . . . . ?
 C5 C4 C18 C21 -64.32(17) . . . . ?
 C5 C6 C7 Ti1 -76.87(16) . . . . ?
 C5 C6 C7 C2 2.6(2) . . . . ?
 C5 C6 C7 C8 -177.17(15) . . . . ?
 C6 C7 C8 Ti1 122.77(16) . . . . ?
 C6 C7 C8 C9 1.5(3) . . . . ?
 C6 C7 C8 C13 -179.28(15) . . . . ?
 C7 C2 C3 C4 2.6(2) . . . . ?
 C7 C8 C9 C10 177.03(15) . . . . ?
 C7 C8 C13 Ti1 -62.31(10) . . . . ?
 C7 C8 C13 C1 -2.93(16) . . . . ?
 C7 C8 C13 C12 -178.30(12) . . . . ?
 C8 C9 C10 C11 1.0(2) . . . . ?
 C9 C8 C13 Ti1 117.04(13) . . . . ?
 C9 C8 C13 C1 176.42(12) . . . . ?
 C9 C8 C13 C12 1.1(2) . . . . ?
 C9 C10 C11 C12 1.2(2) . . . . ?
 C9 C10 C11 C14 -176.85(13) . . . . ?
 C10 C11 C12 C13 -2.3(2) . . . . ?
 C10 C11 C14 C15 -55.45(18) . . . . ?
 C10 C11 C14 C16 -176.87(13) . . . . ?
 C10 C11 C14 C17 63.12(17) . . . . ?
 C11 C12 C13 Ti1 -93.01(14) . . . . ?
 C11 C12 C13 C1 -172.97(14) . . . . ?
 C11 C12 C13 C8 1.2(2) . . . . ?
 C12 C11 C14 C15 126.58(15) . . . . ?
 C12 C11 C14 C16 5.2(2) . . . . ?
 C12 C11 C14 C17 -114.84(16) . . . . ?
 C13 C1 C2 Ti1 -74.36(9) . . . . ?
 C13 C1 C2 C3 -176.45(14) . . . . ?
 C13 C1 C2 C7 -3.10(15) . . . . ?
 C13 C8 C9 C10 -2.1(2) . . . . ?
 C14 C11 C12 C13 175.66(13) . . . . ?
 C18 C4 C5 C6 175.93(14) . . . . ?
 C24 Si1 N1 Ti1 109.49(7) . . . . ?
 C24 Si1 N1 C26 -68.02(13) . . . . ?
 C24 Si1 C1 Ti1 -112.58(7) . . . . ?
 C24 Si1 C1 C2 175.79(11) . . . . ?
 C24 Si1 C1 C13 -38.92(14) . . . . ?
 C25 Si1 N1 Ti1 -126.91(7) . . . . ?
 C25 Si1 N1 C26 55.58(13) . . . . ?
 C25 Si1 C1 Ti1 125.72(6) . . . . ?
 C25 Si1 C1 C2 54.08(14) . . . . ?
 C25 Si1 C1 C13 -160.63(12) . . . . ?
 C26 C29 C30 C31 178.42(16) . . . . ?
 C26 C29 C34 C33 -177.86(17) . . . . ?
 C27 C26 C29 C30 -175.55(16) . . . . ?
 C27 C26 C29 C34 3.5(2) . . . . ?
 C28 C26 C29 C30 65.28(19) . . . . ?
 C28 C26 C29 C34 -115.68(18) . . . . ?
 C29 C30 C31 C32 -0.6(3) . . . . ?
 C30 C29 C34 C33 1.2(3) . . . . ?
 C30 C31 C32 C33 1.4(3) . . . . ?
 C31 C32 C33 C34 -0.9(4) . . . . ?
 C32 C33 C34 C29 -0.4(3) . . . . ?
 C34 C29 C30 C31 -0.7(3) . . . . ?

_shelx_res_file
;
    dm16199.res created by SHELXL-2014/7

TITL dm16199 in P-1
CELL 0.71073 10.0609 11.5953 15.4913 105.488 100.124 110.199
ZERR 2 0.0013 0.0015 0.0029 0.003 0.003 0.002
LATT 1
SFAC C H N Si Ti
UNIT 68 94 2 2 2

L.S. 4
PLAN  -10 0 0
SIZE 0.08 0.12 0.2
TEMP -143.15
BOND $H
fmap 2
MORE -1
ACTA 52
CONF
REM <olex2.extras>
REM <HklSrc "%.\\dm16199.hkl">
REM </olex2.extras>

WGHT    0.049400    0.253800
FVAR       0.17484
TI1   5    0.153037    0.186411    0.300270    11.00000    0.01544    0.01603 =
         0.01877    0.00560    0.00455    0.00489
SI1   4    0.450177    0.328341    0.309231    11.00000    0.01524    0.01847 =
         0.01952    0.00765    0.00688    0.00727
N1    3    0.296244    0.184883    0.233113    11.00000    0.02006    0.01793 =
         0.01764    0.00509    0.00533    0.00724
C1    1    0.345206    0.379383    0.388522    11.00000    0.01483    0.01615 =
         0.01736    0.00654    0.00471    0.00610
C2    1    0.226493    0.418306    0.359676    11.00000    0.01580    0.01592 =
         0.01703    0.00465    0.00431    0.00631
C3    1    0.197897    0.471781    0.289085    11.00000    0.02096    0.01783 =
         0.01866    0.00720    0.00668    0.00817
AFIX  43
H3    2    0.266750    0.493094    0.254879    11.00000   -1.20000
AFIX   0
C4    1    0.070032    0.492701    0.270299    11.00000    0.02336    0.01985 =
         0.01876    0.00674    0.00443    0.01104
C5    1   -0.031963    0.460833    0.322515    11.00000    0.02087    0.02722 =
         0.02366    0.00914    0.00638    0.01468
AFIX  43
H5    2   -0.117907    0.477917    0.310666    11.00000   -1.20000
AFIX   0
C6    1   -0.010205    0.406409    0.389195    11.00000    0.01794    0.02518 =
         0.02120    0.00759    0.00660    0.01026
AFIX  43
H6    2   -0.080225    0.385499    0.422711    11.00000   -1.20000
AFIX   0
C7    1    0.118255    0.381921    0.407241    11.00000    0.01722    0.01882 =
         0.01716    0.00577    0.00495    0.00752
C8    1    0.167693    0.322158    0.468956    11.00000    0.01599    0.01715 =
         0.01732    0.00535    0.00435    0.00644
C9    1    0.103443    0.266262    0.530018    11.00000    0.01721    0.02020 =
         0.02004    0.00601    0.00758    0.00718
AFIX  43
H9    2    0.012259    0.267375    0.537797    11.00000   -1.20000
AFIX   0
C10   1    0.174702    0.210188    0.578071    11.00000    0.02280    0.01909 =
         0.01927    0.00782    0.00885    0.00729
AFIX  43
H10   2    0.130551    0.171207    0.618433    11.00000   -1.20000
AFIX   0
C11   1    0.313318    0.208535    0.569349    11.00000    0.02070    0.01688 =
         0.01660    0.00560    0.00437    0.00720
C12   1    0.378975    0.267201    0.512138    11.00000    0.01736    0.01865 =
         0.01806    0.00564    0.00509    0.00780
AFIX  43
H12   2    0.472749    0.269417    0.507697    11.00000   -1.20000
AFIX   0
C13   1    0.307954    0.324353    0.459773    11.00000    0.01546    0.01494 =
         0.01662    0.00481    0.00450    0.00550
C14   1    0.380704    0.137480    0.621652    11.00000    0.02556    0.02175 =
         0.02100    0.01013    0.00688    0.01200
C15   1    0.397681    0.191999    0.726997    11.00000    0.03945    0.03531 =
         0.02368    0.01426    0.01027    0.02092
AFIX 137
H15A  2    0.439920    0.145022    0.759413    11.00000   -1.50000
H15B  2    0.300264    0.179833    0.735755    11.00000   -1.50000
H15C  2    0.463670    0.285859    0.752904    11.00000   -1.50000
AFIX   0
C16   1    0.532939    0.150999    0.609572    11.00000    0.02617    0.02873 =
         0.03053    0.01404    0.00699    0.01539
AFIX 137
H16A  2    0.522915    0.113915    0.542816    11.00000   -1.50000
H16B  2    0.571545    0.103589    0.643558    11.00000   -1.50000
H16C  2    0.601551    0.244125    0.634628    11.00000   -1.50000
AFIX   0
C17   1    0.274781   -0.009304    0.582439    11.00000    0.03246    0.02279 =
         0.03832    0.01451    0.01098    0.01217
AFIX 137
H17A  2    0.264601   -0.046128    0.515632    11.00000   -1.50000
H17B  2    0.177397   -0.019229    0.590379    11.00000   -1.50000
H17C  2    0.314907   -0.056010    0.616339    11.00000   -1.50000
AFIX   0
C18   1    0.030133    0.544431    0.192892    11.00000    0.03046    0.02706 =
         0.01995    0.01019    0.00699    0.01745
C19   1   -0.002699    0.664383    0.233458    11.00000    0.06245    0.03711 =
         0.03113    0.01696    0.01612    0.03569
AFIX 137
H19A  2   -0.089423    0.637780    0.256178    11.00000   -1.50000
H19B  2   -0.022826    0.700150    0.184492    11.00000   -1.50000
H19C  2    0.083215    0.731707    0.285571    11.00000   -1.50000
AFIX   0
C20   1    0.153947    0.585786    0.148189    11.00000    0.04056    0.04840 =
         0.03093    0.02517    0.01432    0.02527
AFIX 137
H20A  2    0.242804    0.657040    0.195971    11.00000   -1.50000
H20B  2    0.122015    0.616299    0.098400    11.00000   -1.50000
H20C  2    0.176526    0.510575    0.121491    11.00000   -1.50000
AFIX   0
C21   1   -0.109304    0.435981    0.116465    11.00000    0.04038    0.04061 =
         0.02496    0.01139    0.00028    0.01595
AFIX 137
H21A  2   -0.087218    0.361617    0.086832    11.00000   -1.50000
H21B  2   -0.140932    0.470370    0.069101    11.00000   -1.50000
H21C  2   -0.188830    0.406683    0.144643    11.00000   -1.50000
AFIX   0
C22   1    0.108445    0.017530    0.336455    11.00000    0.03286    0.01926 =
         0.02821    0.00841    0.01101    0.00705
AFIX 137
H22A  2    0.194885   -0.003937    0.341361    11.00000   -1.50000
H22B  2    0.022485   -0.056213    0.288039    11.00000   -1.50000
H22C  2    0.087175    0.034001    0.396837    11.00000   -1.50000
AFIX   0
C23   1   -0.059063    0.139499    0.213460    11.00000    0.02263    0.02776 =
         0.03293    0.00394   -0.00054    0.00816
AFIX 137
H23A  2   -0.057416    0.214113    0.194634    11.00000   -1.50000
H23B  2   -0.131899    0.120311    0.247945    11.00000   -1.50000
H23C  2   -0.086333    0.062296    0.157503    11.00000   -1.50000
AFIX   0
C24   1    0.603118    0.297200    0.372023    11.00000    0.02180    0.03544 =
         0.02782    0.01174    0.01006    0.01604
AFIX 137
H24A  2    0.664180    0.373277    0.429385    11.00000   -1.50000
H24B  2    0.664643    0.282967    0.331309    11.00000   -1.50000
H24C  2    0.560768    0.219017    0.388318    11.00000   -1.50000
AFIX   0
C25   1    0.536100    0.447646    0.253658    11.00000    0.02425    0.02355 =
         0.02719    0.01056    0.01240    0.00788
AFIX 137
H25A  2    0.588708    0.412591    0.213567    11.00000   -1.50000
H25B  2    0.606240    0.531361    0.302560    11.00000   -1.50000
H25C  2    0.458528    0.461716    0.215628    11.00000   -1.50000
AFIX   0
C26   1    0.295285    0.092885    0.144921    11.00000    0.03073    0.02283 =
         0.02026    0.00448    0.00879    0.01208
C27   1    0.412209    0.039245    0.167878    11.00000    0.06520    0.04533 =
         0.03330    0.00864    0.01556    0.04125
AFIX 137
H27A  2    0.511067    0.111886    0.194079    11.00000   -1.50000
H27B  2    0.408370   -0.024856    0.110447    11.00000   -1.50000
H27C  2    0.391568   -0.003415    0.213711    11.00000   -1.50000
AFIX   0
C28   1    0.143977   -0.024282    0.099384    11.00000    0.04702    0.02269 =
         0.02754   -0.00042    0.01177    0.00340
AFIX 137
H28A  2    0.124977   -0.073958    0.141419    11.00000   -1.50000
H28B  2    0.143571   -0.081416    0.039832    11.00000   -1.50000
H28C  2    0.066512    0.007517    0.087750    11.00000   -1.50000
AFIX   0
C29   1    0.324727    0.166912    0.076936    11.00000    0.03417    0.02706 =
         0.01737    0.00387    0.00822    0.00860
C30   1    0.232940    0.228695    0.055371    11.00000    0.04899    0.03655 =
         0.02319    0.01091    0.00574    0.01722
AFIX  43
H30   2    0.153221    0.222060    0.081574    11.00000   -1.20000
AFIX   0
C31   1    0.257263    0.299726   -0.004052    11.00000    0.09664    0.04150 =
         0.02368    0.01194    0.00630    0.02891
AFIX  43
H31   2    0.193423    0.340487   -0.018620    11.00000   -1.20000
AFIX   0
C32   1    0.372944    0.311545   -0.041965    11.00000    0.12677    0.04291 =
         0.02998    0.01665    0.03377    0.01907
AFIX  43
H32   2    0.390400    0.361850   -0.081438    11.00000   -1.20000
AFIX   0
C33   1    0.463110    0.250073   -0.022346    11.00000    0.08110    0.05495 =
         0.03647    0.01097    0.03780    0.00845
AFIX  43
H33   2    0.542194    0.257169   -0.049209    11.00000   -1.20000
AFIX   0
C34   1    0.439877    0.177153    0.036712    11.00000    0.04958    0.04264 =
         0.03037    0.00516    0.02090    0.01400
AFIX  43
H34   2    0.502580    0.134635    0.049386    11.00000   -1.20000
AFIX   0
HKLF 4

REM  dm16199 in P-1
REM R1 =  0.0398 for    6998 Fo > 4sig(Fo)  and  0.0635 for all    9413 data
REM    346 parameters refined using      0 restraints

END

WGHT      0.0493      0.2569

REM Highest difference peak  0.452,  deepest hole -0.420,  1-sigma level  0.056
Q1    1   0.5178  0.2998  0.3371  11.00000  0.05    0.45
Q2    1   0.2782  0.3874  0.3695  11.00000  0.05    0.39
Q3    1   0.1787  0.4148  0.3902  11.00000  0.05    0.37
Q4    1   0.3359  0.1629  0.5902  11.00000  0.05    0.35
Q5    1   0.4976  0.3933  0.2793  11.00000  0.05    0.35
Q6    1   0.3512  0.2612  0.5539  11.00000  0.05    0.35
Q7    1   0.3885  0.3595  0.3483  11.00000  0.05    0.34
Q8    1   0.1541  0.2571  0.5672  11.00000  0.05    0.34
Q9    1   0.3808  0.1573  0.6665  11.00000  0.05    0.34
Q10   1   0.0049  0.4541  0.3650  11.00000  0.05    0.33
;
_shelx_res_checksum               26252
_shelx_hkl_file
;
  -1   0   1  159.70    1.99
  -2   0   2  322.62    4.08
  -2   0   2  342.50    4.13
  -3   0   3   53.78    0.89
  -3   0   3   53.11    0.88
  -4   0   4    3.07    0.22
  -4   0   4    3.14    0.21
  -5   0   5    0.24    0.11
  -5   0   5   -0.03    0.10
  -6   0   6    0.21    0.12
  -6   0   6    0.19    0.13
  -7   0   7   47.45    1.10
  -7   0   7   48.20    1.09
  -8   0   8   10.49    0.54
  -8   0   8    9.83    0.51
  -9   0   9    6.62    0.49
  -9   0   9    7.46    0.49
 -10   0  10   14.24    0.67
 -11   0  11   21.18    0.88
 -12   0  12    0.07    0.23
 -13   1  12    0.20    0.26
 -12   1  11   11.05    0.66
 -11   1  10   12.79    0.69
 -11   1  10   14.31    0.70
 -10   1   9    9.60    0.58
 -10   1   9    9.19    0.55
  -9   1   8    2.33    0.30
  -9   1   8    3.11    0.36
  -8   1   7   53.13    1.19
  -8   1   7   54.63    1.24
  -7   1   6   20.68    0.67
  -7   1   6   21.20    0.65
  -6   1   5    4.31    0.30
  -6   1   5    3.88    0.29
  -5   1   4   10.96    0.39
  -5   1   4    9.72    0.37
  -4   1   3  169.32    2.32
  -4   1   3  169.83    2.33
  -3   1   2   40.00    0.69
  -3   1   2   40.98    0.68
  -3   1   2   40.26    0.62
  -2   1   1   19.71    0.34
  -2   1   1   19.15    0.37
  -2   1   1   19.76    0.35
  -1   1   0  350.31    4.70
  -1   1   0  352.69    4.28
  -1   1   0  354.64    4.66
   0   1  -1  282.31    3.37
   0  -1   1  274.35    3.73
  -1  -1   2    1.27    0.11
  -1  -1   2    1.31    0.09
  -2  -1   3    3.35    0.20
  -2  -1   3    3.04    0.18
  -3  -1   4   79.30    1.23
  -3  -1   4   79.01    1.25
  -4  -1   5   27.80    0.65
  -4  -1   5   27.11    0.65
  -5  -1   6    2.93    0.25
  -5  -1   6    3.40    0.26
  -6  -1   7   51.25    1.12
  -6  -1   7   50.86    1.11
  -7  -1   8   36.84    0.98
  -7  -1   8   37.15    0.98
  -8  -1   9    5.27    0.42
  -8  -1   9    5.59    0.42
  -9  -1  10   21.21    0.82
 -10  -1  11   13.02    0.69
 -11  -1  12    3.57    0.46
 -12  -1  13    0.07    0.24
 -13   2  11    0.49    0.26
 -12   2  10    4.29    0.47
 -12   2  10    5.52    0.56
 -11   2   9    9.32    0.57
 -11   2   9   10.12    0.60
 -10   2   8    6.92    0.47
 -10   2   8    6.45    0.45
  -9   2   7    0.25    0.17
  -9   2   7   -0.14    0.15
  -8   2   6   47.56    1.12
  -8   2   6   47.32    1.07
  -7   2   5   26.63    0.71
  -7   2   5   26.40    0.75
  -6   2   4   35.44    0.78
  -6   2   4   36.03    0.82
  -5   2   3  128.63    1.88
  -5   2   3  130.04    1.91
  -4   2   2   23.62    0.50
  -4   2   2   24.42    0.49
  -4   2   2   23.34    0.53
  -3   2   1    0.16    0.07
  -3   2   1    0.15    0.07
  -3   2   1    0.23    0.08
  -2   2   0   18.90    0.33
  -2   2   0   19.05    0.36
  -2   2   0   18.62    0.35
  -1   2  -1  243.05    3.19
   1  -2   1  239.08    2.96
   0   2  -2   89.25    1.11
   0  -2   2   91.78    1.22
  -1  -2   3    4.76    0.21
  -3  -2   5   31.64    0.67
  -3  -2   5   30.93    0.68
  -4  -2   6    1.10    0.18
  -4  -2   6    0.97    0.17
  -5  -2   7   24.85    0.69
  -5  -2   7   25.22    0.71
  -6  -2   8   33.67    0.90
  -7  -2   9    0.49    0.20
  -8  -2  10    7.03    0.49
  -9  -2  11    5.17    0.45
 -10  -2  12    4.19    0.48
 -11  -2  13    1.65    0.37
 -13   3  10    0.42    0.27
 -13   3  10    0.60    0.26
 -12   3   9    2.67    0.39
 -12   3   9    3.07    0.42
 -11   3   8    5.50    0.45
 -11   3   8    6.19    0.47
 -10   3   7    2.23    0.31
 -10   3   7    3.05    0.36
  -9   3   6    0.37    0.18
  -9   3   6    0.28    0.18
  -8   3   5   19.01    0.66
  -8   3   5   18.91    0.61
  -7   3   4    1.11    0.21
  -7   3   4    1.36    0.20
  -6   3   3   19.83    0.56
  -6   3   3   18.57    0.52
  -6   3   3   18.62    0.51
  -5   3   2    2.19    0.19
  -5   3   2    2.72    0.21
  -5   3   2    2.56    0.19
  -4   3   1    4.88    0.23
  -4   3   1    4.93    0.21
  -4   3   1    4.96    0.23
  -3   3   0    2.31    0.16
  -3   3   0    2.41    0.17
  -3   3   0    2.38    0.15
   3  -3   0    2.23    0.16
  -2   3  -1   31.08    0.54
  -2   3  -1   32.45    0.53
   2  -3   1   30.25    0.54
  -1   3  -2   14.15    0.32
  -1   3  -2   14.29    0.33
   1  -3   2   14.62    0.34
   0   3  -3    0.14    0.08
   0   3  -3    0.05    0.08
   0  -3   3    0.21    0.10
  -1  -3   4    9.34    0.32
  -2  -3   5   10.60    0.37
  -3  -3   6    3.40    0.27
  -4  -3   7    7.72    0.38
  -5  -3   8   11.71    0.52
  -6  -3   9    0.15    0.17
  -7  -3  10    1.62    0.28
  -8  -3  11    2.19    0.34
  -9  -3  12    2.23    0.38
 -10  -3  13   -0.07    0.23
 -11  -3  14    0.37    0.29
 -13   4   9    2.08    0.39
 -12   4   8    1.12    0.29
 -12   4   8    1.47    0.32
 -11   4   7    0.03    0.18
 -11   4   7    0.31    0.19
 -10   4   6    4.90    0.39
 -10   4   6    5.58    0.41
  -9   4   5    5.42    0.40
  -9   4   5    5.58    0.37
  -8   4   4    1.90    0.27
  -8   4   4    1.78    0.24
  -7   4   3    9.60    0.40
  -7   4   3    9.06    0.42
  -7   4   3    8.98    0.39
  -6   4   2   13.25    0.41
  -6   4   2   12.27    0.44
  -6   4   2   12.27    0.41
  -5   4   1    0.77    0.14
  -5   4   1    1.17    0.16
  -5   4   1    0.79    0.13
  -4   4   0    4.34    0.22
  -4   4   0    4.34    0.22
   4  -4   0    4.65    0.22
  -3   4  -1   13.02    0.36
  -3   4  -1   13.12    0.34
   3  -4   1   13.30    0.34
  -2   4  -2   10.74    0.30
  -2   4  -2   10.44    0.31
   2  -4   2   10.70    0.33
  -1   4  -3   16.86    0.39
  -1   4  -3   16.87    0.38
   1  -4   3   16.65    0.40
   0   4  -4   28.51    0.53
   0   4  -4   29.56    0.56
   0  -4   4   29.01    0.59
   1   4  -5    6.18    0.26
  -1  -4   5    6.55    0.30
  -2  -4   6   43.00    0.89
  -3  -4   7    5.76    0.36
  -4  -4   8    4.63    0.34
  -5  -4   9    1.38    0.26
  -6  -4  10    0.29    0.19
  -7  -4  11    0.51    0.25
  -8  -4  12    0.16    0.23
  -9  -4  13   -0.06    0.22
 -10  -4  14    0.16    0.25
 -13   5   8    3.39    0.46
 -12   5   7    0.62    0.25
 -11   5   6    1.22    0.27
 -11   5   6    1.49    0.28
 -10   5   5    9.87    0.49
 -10   5   5    9.33    0.52
  -9   5   4    0.11    0.15
  -9   5   4   -0.06    0.15
  -8   5   3   11.84    0.50
  -8   5   3   12.67    0.47
  -8   5   3   13.11    0.51
  -7   5   2    0.04    0.13
  -7   5   2    0.26    0.12
  -7   5   2   -0.03    0.10
  -6   5   1    0.02    0.12
  -6   5   1    0.02    0.12
  -6   5   1    0.23    0.12
  -5   5   0    3.59    0.24
  -5   5   0    3.89    0.24
   5  -5   0    3.92    0.23
  -4   5  -1    1.75    0.18
  -4   5  -1    1.73    0.17
   4  -5   1    1.75    0.18
  -3   5  -2   27.18    0.55
  -3   5  -2   28.23    0.59
   3  -5   2   27.32    0.58
  -2   5  -3   23.86    0.51
  -2   5  -3   24.35    0.53
   2  -5   3   24.17    0.51
  -1   5  -4   25.02    0.54
  -1   5  -4   24.80    0.51
   1  -5   4   25.59    0.55
   0   5  -5    6.62    0.27
   0   5  -5    6.71    0.28
   0  -5   5    6.63    0.29
   1   5  -6   15.42    0.44
  -1  -5   6   16.68    0.50
   2   5  -7    4.17    0.27
  -2  -5   7    4.76    0.31
  -3  -5   8    6.74    0.39
  -4  -5   9    7.82    0.46
  -5  -5  10    2.63    0.34
  -6  -5  11    0.14    0.20
  -7  -5  12   -0.04    0.21
  -8  -5  13    0.00    0.23
  -9  -5  14    1.12    0.35
 -10  -5  15    3.43    0.51
 -13   6   7    0.01    0.21
 -12   6   6    5.54    0.47
 -11   6   5    2.07    0.32
 -10   6   4    0.25    0.18
 -10   6   4    0.51    0.20
  -9   6   3    1.56    0.25
  -9   6   3    1.57    0.24
  -9   6   3    2.01    0.25
  -8   6   2    4.58    0.33
  -8   6   2    4.43    0.34
  -8   6   2    4.04    0.31
  -7   6   1    2.85    0.27
  -7   6   1    2.77    0.26
   7  -6  -1    2.78    0.25
  -6   6   0    0.28    0.13
  -6   6   0    0.33    0.14
   6  -6   0    0.14    0.15
  -5   6  -1   15.31    0.48
  -5   6  -1   14.74    0.44
   5  -6   1   14.77    0.45
  -4   6  -2    3.38    0.23
  -4   6  -2    3.19    0.23
   4  -6   2    3.49    0.27
  -3   6  -3    7.91    0.32
  -3   6  -3    7.92    0.31
   3  -6   3    7.91    0.35
  -2   6  -4   87.66    1.31
  -2   6  -4   85.48    1.32
   2  -6   4   87.52    1.34
  -1   6  -5   14.05    0.41
  -1   6  -5   13.74    0.43
   1  -6   5   14.41    0.43
   0   6  -6    3.71    0.24
   0   6  -6    3.97    0.27
   0  -6   6    3.75    0.27
   1   6  -7    5.65    0.31
   1   6  -7    5.94    0.31
  -1  -6   7    5.72    0.33
   2   6  -8   18.90    0.55
  -2  -6   8   18.41    0.63
   3   6  -9    7.53    0.38
  -3  -6   9    7.45    0.43
  -4  -6  10   12.61    0.59
  -5  -6  11    2.22    0.33
  -6  -6  12    1.88    0.33
  -7  -6  13   -0.09    0.22
  -8  -6  14   -0.01    0.24
  -9  -6  15    0.23    0.29
 -13   7   6    0.24    0.23
 -12   7   5    0.64    0.23
 -11   7   4    0.29    0.20
 -10   7   3    2.91    0.34
 -10   7   3    3.09    0.34
  -9   7   2    2.09    0.28
   9  -7  -2    3.00    0.28
  -8   7   1    1.86    0.24
  -8   7   1    1.91    0.25
   8  -7  -1    1.56    0.24
  -7   7   0    6.27    0.36
  -7   7   0    6.87    0.37
   7  -7   0    6.72    0.38
  -6   7  -1   20.16    0.57
  -6   7  -1   19.45    0.59
   6  -7   1   20.04    0.57
  -5   7  -2    9.51    0.41
  -5   7  -2    8.67    0.35
   5  -7   2    8.59    0.44
  -4   7  -3    0.89    0.17
  -4   7  -3    1.20    0.17
   4  -7   3    1.07    0.23
  -3   7  -4   16.76    0.47
  -3   7  -4   17.03    0.51
   3  -7   4   16.19    0.48
  -2   7  -5    0.39    0.17
  -2   7  -5    0.23    0.13
   2  -7   5    0.47    0.17
  -1   7  -6    0.61    0.17
  -1   7  -6    0.80    0.17
   1  -7   6    0.69    0.18
   0   7  -7    9.14    0.39
   0   7  -7    8.93    0.40
   0  -7   7    8.79    0.42
   1   7  -8    4.22    0.31
   1   7  -8    3.74    0.32
  -1  -7   8    3.39    0.32
   2   7  -9   14.42    0.51
  -2  -7   9   14.12    0.59
   3   7 -10   11.60    0.49
  -3  -7  10   11.05    0.56
   4   7 -11   11.97    0.52
  -4  -7  11   11.43    0.58
   5   7 -12    7.06    0.43
  -5  -7  12    6.70    0.51
   6   7 -13    1.56    0.26
  -6  -7  13    1.51    0.32
   7   7 -14    0.61    0.24
  -7  -7  14    0.50    0.27
  -8  -7  15    0.82    0.33
 -13   8   5    0.40    0.26
 -12   8   4    0.09    0.19
 -11   8   3    3.71    0.40
 -11   8   3    2.44    0.33
 -10   8   2    4.34    0.36
 -10   8   2    4.45    0.40
  -9   8   1   10.68    0.52
  -9   8   1   11.00    0.50
  -8   8   0    3.34    0.31
  -8   8   0    3.71    0.34
  -7   8  -1   54.77    1.09
  -7   8  -1   54.82    1.15
   7  -8   1   53.98    1.07
  -6   8  -2    6.87    0.39
  -6   8  -2    6.42    0.34
   6  -8   2    6.25    0.47
  -5   8  -3    0.61    0.16
  -5   8  -3    0.72    0.18
   5  -8   3    0.68    0.25
  -4   8  -4   53.88    0.98
  -4   8  -4   52.87    1.07
   4  -8   4   54.04    1.00
  -3   8  -5   10.66    0.44
  -3   8  -5   10.67    0.45
   3  -8   5   11.38    0.43
  -2   8  -6    1.70    0.22
  -2   8  -6    1.70    0.25
   2  -8   6    1.72    0.23
  -1   8  -7    0.94    0.20
  -1   8  -7    1.37    0.23
   1  -8   7    1.01    0.21
   0   8  -8   11.97    0.48
   0   8  -8   14.22    0.51
   0  -8   8   14.54    0.54
   1   8  -9    0.44    0.17
   1   8  -9    0.53    0.20
  -1  -8   9    0.61    0.20
   2   8 -10   -0.18    0.16
   2   8 -10    0.16    0.16
  -2  -8  10    0.08    0.18
   3   8 -11    3.63    0.34
   3   8 -11    3.23    0.35
  -3  -8  11    3.38    0.38
   4   8 -12    8.72    0.47
  -4  -8  12    8.85    0.56
   5   8 -13    2.61    0.32
  -5  -8  13    2.32    0.37
   6   8 -14    4.29    0.41
  -6  -8  14    3.51    0.47
  -7  -8  15    1.48    0.37
  -8  -8  16    0.56    0.33
 -13   9   4   -0.06    0.20
 -12   9   3    7.05    0.52
 -12   9   3    7.97    0.54
 -11   9   2    3.57    0.40
 -11   9   2    3.56    0.39
 -10   9   1   -0.17    0.13
 -10   9   1   -0.01    0.14
  -9   9   0    0.03    0.15
  -9   9   0   -0.07    0.14
  -8   9  -1   15.47    0.57
  -8   9  -1   14.88    0.60
  -7   9  -2    0.67    0.17
  -7   9  -2    0.58    0.20
  -6   9  -3    0.23    0.14
  -6   9  -3   -0.13    0.14
   6  -9   3   -0.20    0.25
  -5   9  -4    0.33    0.15
  -5   9  -4    0.33    0.16
   5  -9   4    0.51    0.23
  -4   9  -5    8.53    0.40
  -4   9  -5    8.60    0.43
   4  -9   5    8.28    0.41
  -3   9  -6    0.30    0.20
  -3   9  -6    0.18    0.16
   3  -9   6    0.41    0.19
  -2   9  -7    2.56    0.30
  -2   9  -7    2.92    0.30
   2  -9   7    2.34    0.28
  -1   9  -8   41.63    0.93
  -1   9  -8   42.38    0.97
   1  -9   8   43.35    0.99
   0   9  -9   15.97    0.58
   0   9  -9   16.18    0.59
   0  -9   9   16.09    0.61
   1   9 -10   -0.06    0.16
   1   9 -10   -0.04    0.14
  -1  -9  10    0.09    0.16
   2   9 -11    9.37    0.48
   2   9 -11    8.40    0.47
  -2  -9  11    9.25    0.54
   3   9 -12   11.36    0.57
   3   9 -12    9.86    0.51
  -3  -9  12   10.99    0.61
   4   9 -13   -0.11    0.18
   4   9 -13    0.29    0.22
  -4  -9  13   -0.05    0.20
   5   9 -14    2.84    0.35
   5   9 -14    3.68    0.44
  -5  -9  14    2.58    0.43
   6   9 -15   12.01    0.69
  -6  -9  15   11.91    0.75
  -7  -9  16    3.72    0.54
 -12  10   2   11.78    0.66
 -11  10   1    2.01    0.33
 -10  10   0    1.47    0.27
 -10  10   0    0.86    0.24
  -9  10  -1    7.15    0.41
  -9  10  -1    6.33    0.44
  -8  10  -2   11.79    0.57
  -8  10  -2   12.43    0.51
  -7  10  -3    5.51    0.41
  -7  10  -3    6.24    0.37
  -6  10  -4   16.95    0.65
  -6  10  -4   16.14    0.52
  -5  10  -5   37.61    0.97
  -5  10  -5   38.62    0.83
   5 -10   5   37.14    0.84
  -4  10  -6   -0.13    0.16
  -4  10  -6    0.02    0.14
   4 -10   6   -0.10    0.17
  -3  10  -7    2.53    0.30
  -3  10  -7    2.07    0.28
   3 -10   7    2.54    0.29
  -2  10  -8    9.18    0.48
  -2  10  -8    9.90    0.49
   2 -10   8   11.06    0.50
  -1  10  -9    4.42    0.38
  -1  10  -9    3.99    0.35
   1 -10   9    4.08    0.35
   0  10 -10    0.40    0.22
   0  10 -10    0.24    0.19
   0 -10  10    0.13    0.18
   1  10 -11    0.50    0.22
   1  10 -11    0.42    0.19
  -1 -10  11    0.36    0.23
   2  10 -12   25.55    0.81
   2  10 -12   26.76    0.83
  -2 -10  12   25.68    0.91
   3  10 -13    5.25    0.45
   3  10 -13    4.17    0.40
  -3 -10  13    3.89    0.45
   4  10 -14    0.23    0.20
   4  10 -14    0.97    0.28
  -4 -10  14    0.46    0.26
   5  10 -15    9.33    0.62
   5  10 -15    8.85    0.56
  -5 -10  15    9.50    0.65
  -6 -10  16    5.92    0.62
 -13  11   2    6.87    0.55
 -12  11   1    2.21    0.37
 -11  11   0    0.63    0.24
 -10  11  -1    1.22    0.27
  -9  11  -2    9.02    0.52
  -8  11  -3    6.38    0.44
  -7  11  -4    0.26    0.18
  -6  11  -5   15.20    0.63
  -5  11  -6    9.48    0.50
  -4  11  -7    4.22    0.39
   4 -11   7    3.68    0.33
  -3  11  -8    0.19    0.18
   3 -11   8   -0.20    0.17
  -2  11  -9   41.74    1.06
   2 -11   9   43.41    1.05
  -1  11 -10    9.58    0.52
   1 -11  10   10.32    0.54
   0  11 -11   -0.08    0.17
   0 -11  11   -0.37    0.17
   1  11 -12   15.34    0.65
  -1 -11  12   14.71    0.70
   2  11 -13    4.99    0.44
  -2 -11  13    5.64    0.49
   3  11 -14   -0.15    0.19
  -3 -11  14   -0.01    0.23
   4  11 -15    1.19    0.29
  -4 -11  15    0.86    0.33
  -5 -11  16    3.52    0.51
 -12  12   0    3.00    0.42
 -11  12  -1    0.43    0.25
 -10  12  -2    5.69    0.51
  -9  12  -3   17.20    0.75
  -8  12  -4    6.23    0.48
  -7  12  -5    0.40    0.21
  -6  12  -6    9.98    0.56
  -5  12  -7    4.28    0.42
  -4  12  -8    0.70    0.24
  -3  12  -9    3.96    0.40
   3 -12   9    3.42    0.36
  -2  12 -10    2.58    0.34
   2 -12  10    2.76    0.34
  -1  12 -11    4.41    0.42
   1 -12  11    3.92    0.42
   0  12 -12    1.95    0.32
   0 -12  12    2.27    0.36
   1  12 -13    9.81    0.58
  -1 -12  13    9.59    0.61
   2  12 -14    2.91    0.39
  -2 -12  14    2.84    0.43
   3  12 -15   -0.05    0.23
  -3 -12  15    0.21    0.28
 -12  13  -1    3.08    0.43
 -11  13  -2    0.65    0.25
 -10  13  -3    8.82    0.59
  -9  13  -4   20.46    0.84
  -8  13  -5    0.17    0.21
  -7  13  -6    4.83    0.46
  -6  13  -7    2.95    0.38
  -5  13  -8    0.69    0.24
  -4  13  -9    0.15    0.22
  -3  13 -10    4.57    0.45
  -2  13 -11    7.74    0.53
  -1  13 -12    0.47    0.24
   1 -13  12    0.94    0.28
   0  13 -13    2.32    0.36
   0 -13  13    2.13    0.39
   1  13 -14    5.41    0.50
  -1 -13  14    5.25    0.54
   2  13 -15    6.02    0.54
  -2 -13  15    6.56    0.59
 -11  14  -3    0.06    0.22
 -10  14  -4   -0.01    0.23
  -9  14  -5    0.43    0.25
  -8  14  -6    1.15    0.30
  -7  14  -7    0.38    0.24
  -6  14  -8    2.18    0.36
  -5  14  -9    1.89    0.34
  -4  14 -10   12.70    0.69
  -3  14 -11    3.76    0.45
  -2  14 -12    0.81    0.28
  -1  14 -13   -0.13    0.21
   0  14 -14    0.35    0.27
  -1 -14  15    4.30    0.53
  -9  15  -6   -0.01    0.23
  -8  15  -7    1.46    0.33
  -7  15  -8    1.16    0.32
  -6  15  -9    0.12    0.21
  -5  15 -10    0.61    0.29
  -4  15 -11    1.78    0.36
  -3  15 -12    0.90    0.31
  -2  15 -13   -0.17    0.22
  -4  16 -11    7.17    0.63
  -5  16 -10    0.50    0.29
  -6  16  -9    0.16    0.26
  -7  16  -8    6.39    0.59
  -1  15 -13    0.73    0.28
  -2  15 -12    0.30    0.25
  -3  15 -11    5.78    0.54
  -4  15 -10    1.23    0.32
  -5  15  -9    0.61    0.27
  -6  15  -8    3.74    0.46
  -7  15  -7    3.50    0.45
  -8  15  -6    1.49    0.35
  -9  15  -5   -0.04    0.22
 -10  15  -4   12.08    0.73
   1  14 -14    2.40    0.39
   0  14 -13    3.50    0.43
  -1  14 -12    0.43    0.24
  -2  14 -11    3.01    0.39
  -3  14 -10    1.00    0.29
  -4  14  -9    1.44    0.32
  -5  14  -8    0.40    0.24
  -6  14  -7    1.82    0.33
  -7  14  -6    4.40    0.47
  -8  14  -5   -0.02    0.21
  -9  14  -4    3.62    0.44
 -10  14  -3    3.16    0.44
 -11  14  -2    0.45    0.27
  -3 -13  15   -0.15    0.25
  -2 -13  14    2.57    0.43
   2  13 -14    3.03    0.40
  -1 -13  13    3.81    0.46
   1  13 -13    2.72    0.38
   0 -13  12    0.32    0.26
   0  13 -12    0.30    0.23
  -1  13 -11    0.18    0.20
  -2  13 -10   -0.02    0.19
  -3  13  -9    2.33    0.33
  -4  13  -8   -0.20    0.19
  -5  13  -7    3.72    0.41
  -6  13  -6    0.62    0.25
  -7  13  -5    0.35    0.23
  -8  13  -4    0.74    0.25
  -9  13  -3    0.13    0.22
 -10  13  -2   -0.09    0.20
 -11  13  -1    0.68    0.26
 -12  13   0    3.66    0.48
  -4 -12  15    0.42    0.29
  -3 -12  14   -0.05    0.24
   3  12 -14   -0.21    0.21
  -2 -12  13    0.65    0.28
   2  12 -13    0.30    0.23
  -1 -12  12    0.05    0.21
   1  12 -12   -0.26    0.18
   0 -12  11    1.38    0.30
   0  12 -11    1.26    0.27
   1 -12  10    0.52    0.23
  -1  12 -10    0.51    0.23
   2 -12   9    0.57    0.23
  -2  12  -9    0.47    0.22
  -3  12  -8    3.19    0.36
  -4  12  -7   12.06    0.58
  -5  12  -6    3.17    0.38
  -6  12  -5    1.20    0.26
  -7  12  -4   -0.16    0.17
  -8  12  -3    0.45    0.22
  -9  12  -2    0.20    0.21
 -10  12  -1    0.24    0.20
 -11  12   0    1.68    0.32
 -12  12   1    0.74    0.27
  -5 -11  15    0.22    0.29
  -4 -11  14   -0.18    0.23
   4  11 -14    0.29    0.23
  -3 -11  13    0.13    0.23
   3  11 -13   -0.11    0.19
   3  11 -13    0.56    0.27
  -2 -11  12    0.29    0.24
   2  11 -12    0.89    0.24
   2  11 -12    0.74    0.28
  -1 -11  11    0.62    0.25
   1  11 -11    0.78    0.28
   1  11 -11    0.42    0.22
   0 -11  10    0.80    0.24
   0  11 -10    1.10    0.30
   0  11 -10    1.37    0.26
   1 -11   9    1.70    0.28
  -1  11  -9    1.52    0.26
  -1  11  -9    1.78    0.32
   2 -11   8   11.41    0.50
  -2  11  -8   11.59    0.55
  -2  11  -8   10.06    0.54
   3 -11   7    7.00    0.40
  -3  11  -7    7.16    0.43
  -4  11  -6    2.64    0.31
  -5  11  -5    0.94    0.25
  -6  11  -4   24.55    0.80
  -7  11  -3    1.33    0.26
  -8  11  -2    1.70    0.28
  -9  11  -1    0.52    0.21
 -10  11   0    0.41    0.21
 -11  11   1    0.36    0.21
 -12  11   2    0.61    0.28
 -13  11   3    1.62    0.36
  -6 -10  15    1.12    0.37
   6  10 -15    1.95    0.38
  -5 -10  14    4.09    0.49
   5  10 -14    4.64    0.49
  -4 -10  13   -0.11    0.21
   4  10 -13   -0.09    0.19
   4  10 -13    0.20    0.22
  -3 -10  12    0.47    0.25
   3  10 -12    0.85    0.26
   3  10 -12    0.19    0.20
  -2 -10  11   10.85    0.59
   2  10 -11   10.59    0.56
   2  10 -11   10.90    0.54
  -1 -10  10    7.23    0.48
   1  10 -10    7.46    0.44
   1  10 -10    7.84    0.47
   0 -10   9    1.71    0.27
   0  10  -9    1.55    0.29
   0  10  -9    1.20    0.24
   1 -10   8    3.00    0.32
  -1  10  -8    2.81    0.30
  -1  10  -8    2.72    0.33
   2 -10   7   34.91    0.85
  -2  10  -7   35.39    0.89
  -2  10  -7   34.68    0.88
   3 -10   6    2.92    0.28
  -3  10  -6    3.20    0.32
  -3  10  -6    2.63    0.32
   4 -10   5    0.33    0.17
  -4  10  -5   -0.06    0.14
  -4  10  -5   -0.18    0.17
  -5  10  -4    2.27    0.29
  -5  10  -4    2.73    0.29
  -6  10  -3    2.51    0.29
  -6  10  -3    2.11    0.26
  -7  10  -2   -0.10    0.15
  -7  10  -2    0.25    0.17
  -8  10  -1    1.93    0.27
  -8  10  -1    1.55    0.26
  -9  10   0    9.26    0.49
  -9  10   0    8.36    0.51
 -10  10   1    1.50    0.27
 -10  10   1    0.96    0.26
 -11  10   2    2.42    0.34
 -11  10   2    1.94    0.32
 -12  10   3    7.46    0.55
 -12  10   3    7.41    0.53
 -13  10   4    1.52    0.34
  -7  -9  15    0.29    0.26
   7   9 -15    0.28    0.26
  -6  -9  14    4.89    0.55
   6   9 -14    4.50    0.49
  -5  -9  13    0.76    0.30
   5   9 -13    0.71    0.27
   5   9 -13    0.48    0.22
  -4  -9  12    0.93    0.28
   4   9 -12    1.15    0.25
   4   9 -12    1.06    0.26
  -3  -9  11    3.60    0.41
   3   9 -11    3.60    0.38
   3   9 -11    4.05    0.36
  -2  -9  10   16.08    0.67
   2   9 -10   16.38    0.60
   2   9 -10   16.11    0.63
  -1  -9   9   31.90    0.90
   1   9  -9   32.44    0.83
   1   9  -9   31.25    0.84
   0  -9   8    2.15    0.28
   0   9  -8    2.31    0.27
   0   9  -8    2.79    0.33
   1  -9   7   77.85    1.41
  -1   9  -7   76.90    1.40
  -1   9  -7   79.77    1.40
   2  -9   6   20.76    0.60
  -2   9  -6   20.27    0.63
  -2   9  -6   20.06    0.64
   3  -9   5   25.59    0.63
  -3   9  -5   25.78    0.72
  -3   9  -5   24.77    0.71
   4  -9   4   33.69    0.72
  -4   9  -4   32.40    0.78
  -4   9  -4   33.97    0.85
   5  -9   3   -0.12    0.17
  -5   9  -3    0.05    0.15
  -5   9  -3   -0.02    0.14
  -6   9  -2    0.04    0.14
  -6   9  -2    0.05    0.15
  -7   9  -1    5.12    0.38
  -7   9  -1    4.62    0.34
  -8   9   0   29.37    0.85
  -8   9   0   29.75    0.83
  -9   9   1    0.16    0.16
  -9   9   1    0.27    0.17
 -10   9   2    1.40    0.27
 -10   9   2    1.28    0.26
 -11   9   3   10.00    0.56
 -11   9   3   11.26    0.58
 -12   9   4   10.62    0.61
 -13   9   5    0.33    0.23
  -8  -8  15    0.12    0.26
  -7  -8  14    1.66    0.39
  -6  -8  13    7.20    0.57
   6   8 -13    6.83    0.46
  -5  -8  12    2.88    0.39
   5   8 -12    3.26    0.34
  -4  -8  11   15.53    0.70
   4   8 -11   16.22    0.59
  -3  -8  10   11.95    0.59
   3   8 -10   11.92    0.55
   3   8 -10   11.73    0.49
  -2  -8   9    3.17    0.34
   2   8  -9    3.38    0.34
   2   8  -9    3.09    0.29
  -1  -8   8    0.65    0.20
   1   8  -8    0.57    0.17
   1   8  -8    0.62    0.22
   0  -8   7   37.99    0.89
   0   8  -7   38.74    0.88
   0   8  -7   39.21    0.86
   1  -8   6    2.81    0.26
  -1   8  -6    2.81    0.26
  -1   8  -6    3.15    0.30
   2  -8   5    1.12    0.19
  -2   8  -5    0.47    0.16
  -2   8  -5    0.94    0.23
   3  -8   4    2.95    0.25
  -3   8  -4    3.24    0.30
  -3   8  -4    3.86    0.30
   4  -8   3   26.71    0.59
  -4   8  -3   26.55    0.70
  -4   8  -3   27.41    0.67
   5  -8   2    6.60    0.38
  -5   8  -2    6.55    0.37
  -5   8  -2    5.84    0.33
   6  -8   1    3.71    0.31
  -6   8  -1    3.47    0.29
  -6   8  -1    3.16    0.30
  -7   8   0  101.47    1.71
  -7   8   0   99.81    1.71
  -8   8   1   41.13    1.00
  -8   8   1   40.85    1.01
  -9   8   2    0.00    0.16
  -9   8   2   -0.10    0.14
 -10   8   3   13.11    0.60
 -10   8   3   14.06    0.61
 -11   8   4   10.91    0.58
 -12   8   5    0.03    0.19
 -13   8   6    0.84    0.28
  -9  -7  15    1.47    0.39
  -8  -7  14    1.73    0.37
  -7  -7  13   16.93    0.83
  -6  -7  12    2.18    0.36
   6   7 -12    1.96    0.27
  -5  -7  11   15.53    0.72
   5   7 -11   15.74    0.58
  -4  -7  10   46.70    1.20
   4   7 -10   47.28    1.01
  -3  -7   9    2.05    0.28
   3   7  -9    1.67    0.23
  -2  -7   8    1.73    0.25
   2   7  -8    1.33    0.20
   2   7  -8    1.61    0.25
  -1  -7   7    9.67    0.44
   1   7  -7    8.99    0.43
   1   7  -7    9.88    0.40
   0  -7   6   43.92    0.91
   0   7  -6   43.84    0.87
   0   7  -6   42.99    0.88
   1  -7   5   23.89    0.59
  -1   7  -5   24.45    0.62
  -1   7  -5   23.96    0.61
   2  -7   4   20.35    0.50
  -2   7  -4   21.43    0.58
  -2   7  -4   21.03    0.56
   3  -7   3   88.83    1.33
  -3   7  -3   88.69    1.43
  -3   7  -3   92.64    1.43
   4  -7   2   12.77    0.40
  -4   7  -2   12.52    0.44
  -4   7  -2   13.71    0.45
   5  -7   1    1.49    0.23
  -5   7  -1    1.46    0.20
  -5   7  -1    2.10    0.23
   6  -7   0   40.90    0.79
  -6   7   0   40.82    0.89
  -6   7   0   42.54    0.92
   7  -7  -1   34.44    0.72
  -7   7   1   35.34    0.86
  -7   7   1   35.48    0.86
   8  -7  -2    1.36    0.21
  -8   7   2    1.07    0.21
  -8   7   2    0.84    0.20
  -9   7   3    5.11    0.36
  -9   7   3    4.30    0.38
 -10   7   4   11.48    0.56
 -10   7   4   10.73    0.55
 -11   7   5    4.87    0.43
 -12   7   6    1.49    0.30
 -13   7   7    4.63    0.51
  -9  -6  14    0.22    0.24
  -8  -6  13    9.82    0.66
  -7  -6  12    8.66    0.58
  -6  -6  11   -0.25    0.18
  -5  -6  10   15.04    0.67
  -4  -6   9   17.13    0.66
   4   6  -9   15.95    0.53
  -3  -6   8    8.13    0.45
   3   6  -8    7.47    0.37
  -2  -6   7    3.40    0.31
   2   6  -7    3.17    0.26
  -1  -6   6   25.49    0.67
   1   6  -6   26.10    0.64
   1   6  -6   25.62    0.60
   0  -6   5   45.81    0.87
   0   6  -5   43.23    0.84
   0   6  -5   45.31    0.83
   1  -6   4    0.14    0.11
  -1   6  -4    0.16    0.14
  -1   6  -4   -0.04    0.09
   2  -6   3   89.00    1.33
  -2   6  -3   92.54    1.41
  -2   6  -3   93.04    1.37
   3  -6   2   15.99    0.39
  -3   6  -2   16.45    0.46
  -3   6  -2   16.40    0.46
   4  -6   1   -0.16    0.15
  -4   6  -1    0.05    0.11
  -4   6  -1    0.11    0.10
   5  -6   0    3.90    0.26
  -5   6   0    4.36    0.29
  -5   6   0    4.36    0.27
   6  -6  -1   35.76    0.68
  -6   6   1   33.78    0.78
  -6   6   1   34.93    0.80
  -7   6   2   19.73    0.52
  -7   6   2   19.65    0.60
  -7   6   2   19.82    0.64
  -8   6   3    1.11    0.19
  -8   6   3    1.12    0.22
  -8   6   3    0.95    0.20
  -9   6   4   15.48    0.60
  -9   6   4   15.48    0.61
  -9   6   4   15.62    0.53
 -10   6   5    9.22    0.51
 -11   6   6    1.27    0.28
 -12   6   7    2.27    0.37
 -13   6   8    6.27    0.52
 -10  -5  14    0.23    0.28
  -9  -5  13    7.37    0.60
  -8  -5  12   19.10    0.85
  -7  -5  11    7.02    0.53
  -6  -5  10   12.14    0.60
  -5  -5   9   20.42    0.73
  -4  -5   8    2.09    0.29
  -3  -5   7    8.94    0.43
  -2  -5   6   15.84    0.52
   2   5  -6   16.47    0.45
  -1  -5   5   51.79    0.96
   1   5  -5   51.10    0.86
   1   5  -5   51.60    0.93
   0  -5   4   40.71    0.77
   0   5  -4   42.05    0.73
   0   5  -4   41.81    0.76
   1  -5   3   18.48    0.42
  -1   5  -3   19.09    0.45
  -1   5  -3   18.28    0.45
   2  -5   2   31.74    0.55
  -2   5  -2   32.09    0.64
  -2   5  -2   31.20    0.61
   3  -5   1    8.38    0.29
  -3   5  -1    7.74    0.30
  -3   5  -1    8.25    0.32
   4  -5   0   22.78    0.45
  -4   5   0   22.47    0.54
  -4   5   0   22.90    0.54
   5  -5  -1   44.28    0.75
  -5   5   1   47.76    0.90
  -5   5   1   44.10    0.85
  -6   5   2   22.47    0.63
  -6   5   2   22.47    0.59
  -6   5   2   22.35    0.52
  -7   5   3    6.01    0.33
  -7   5   3    5.46    0.34
  -7   5   3    5.86    0.30
  -8   5   4    3.04    0.29
  -8   5   4    2.96    0.27
  -8   5   4    2.84    0.30
  -9   5   5   21.77    0.66
  -9   5   5   20.91    0.73
 -10   5   6    0.29    0.19
 -10   5   6    0.42    0.19
 -11   5   7    2.11    0.30
 -11   5   7    1.94    0.32
 -12   5   8    2.64    0.39
 -13   5   9    1.69    0.37
 -11  -4  14    9.01    0.68
 -10  -4  13    0.01    0.24
  -9  -4  12   16.41    0.81
  -8  -4  11    1.92    0.35
  -7  -4  10    0.48    0.21
  -6  -4   9   19.51    0.73
  -5  -4   8   10.11    0.51
  -4  -4   7   14.92    0.56
  -3  -4   6    3.25    0.28
  -2  -4   5   85.60    1.41
  -1  -4   4    8.92    0.32
   1   4  -4    9.03    0.28
   0  -4   3   29.93    0.57
   0   4  -3   30.03    0.57
   0   4  -3   30.05    0.54
   1  -4   2   71.66    1.02
  -1   4  -2   71.90    1.02
  -1   4  -2   72.46    1.07
   2  -4   1    3.57    0.19
  -2   4  -1    3.29    0.18
  -2   4  -1    3.70    0.22
   3  -4   0   14.21    0.30
  -3   4   0   14.01    0.38
  -3   4   0   14.13    0.37
  -4   4   1   11.01    0.28
  -4   4   1   11.03    0.36
  -4   4   1   10.58    0.35
  -5   4   2   80.38    1.33
  -5   4   2   80.48    1.20
  -5   4   2   79.51    1.24
  -6   4   3   22.32    0.61
  -6   4   3   21.33    0.53
  -6   4   3   22.48    0.58
  -7   4   4    3.32    0.29
  -7   4   4    3.16    0.28
  -7   4   4    2.57    0.24
  -8   4   5    3.22    0.32
  -8   4   5    2.96    0.28
  -9   4   6   13.02    0.58
  -9   4   6   13.83    0.54
 -10   4   7    0.66    0.22
 -10   4   7    0.72    0.21
 -11   4   8    0.85    0.26
 -11   4   8    0.62    0.22
 -12   4   9    2.78    0.41
 -12   4   9    2.94    0.38
 -13   4  10   -0.14    0.21
 -11  -3  13    0.71    0.30
 -10  -3  12    7.93    0.61
  -9  -3  11    4.14    0.47
  -8  -3  10    2.39    0.36
  -7  -3   9    3.76    0.40
  -6  -3   8   20.15    0.70
  -5  -3   7    0.78    0.20
  -4  -3   6    1.15    0.19
  -3  -3   5   72.06    1.25
  -2  -3   4   55.98    0.98
  -1  -3   3    7.94    0.27
   1   3  -3    7.97    0.24
   0  -3   2   56.11    0.83
   0   3  -2   56.23    0.84
   0   3  -2   55.58    0.78
   1  -3   1    1.92    0.14
  -1   3  -1    1.55    0.16
  -1   3  -1    1.16    0.10
   2  -3   0   39.20    0.56
  -2   3   0   39.23    0.66
  -2   3   0   37.50    0.61
  -3   3   1    4.78    0.21
  -3   3   1    4.58    0.16
  -3   3   1    4.84    0.23
  -4   3   2   30.67    0.59
  -4   3   2   29.97    0.55
  -4   3   2   29.87    0.64
  -5   3   3  113.33    1.65
  -5   3   3  113.74    1.75
  -5   3   3  117.18    1.62
  -6   3   4    0.76    0.14
  -6   3   4    1.07    0.18
  -7   3   5   -0.01    0.12
  -7   3   5   -0.06    0.13
  -8   3   6    2.71    0.28
  -8   3   6    3.22    0.34
  -9   3   7    0.53    0.18
  -9   3   7    0.59    0.19
 -10   3   8   -0.06    0.17
 -10   3   8    0.26    0.18
 -11   3   9    0.61    0.24
 -11   3   9    0.51    0.23
 -12   3  10    0.09    0.21
 -12   3  10    0.28    0.23
 -13   3  11    0.46    0.27
 -12  -2  13    1.84    0.41
 -11  -2  12    0.23    0.26
 -10  -2  11    7.29    0.54
  -9  -2  10    1.18    0.30
  -8  -2   9   12.74    0.62
  -7  -2   8   29.77    0.89
  -6  -2   7    3.81    0.35
  -5  -2   6    0.91    0.19
  -4  -2   5    5.91    0.32
  -2  -2   3   18.92    0.45
  -1  -2   2    7.59    0.25
   0  -2   1    7.99    0.19
   0   2  -1    8.70    0.19
   0   2  -1    7.92    0.21
   1  -2   0  274.35    3.65
  -1   2   0  299.09    3.24
  -1   2   0  290.51    3.78
  -2   2   1   21.15    0.42
  -2   2   1   21.14    0.39
  -2   2   1   21.17    0.34
  -3   2   2   14.02    0.37
  -3   2   2   13.81    0.34
  -3   2   2   14.12    0.31
  -4   2   3   17.63    0.42
  -4   2   3   17.62    0.47
  -4   2   3   17.66    0.42
  -5   2   4   17.97    0.48
  -5   2   4   18.54    0.52
  -6   2   5   36.01    0.84
  -6   2   5   35.78    0.79
  -7   2   6    1.73    0.23
  -7   2   6    1.74    0.24
  -8   2   7    7.84    0.47
  -8   2   7    8.40    0.43
  -9   2   8    0.22    0.18
  -9   2   8    0.30    0.18
 -10   2   9    2.59    0.34
 -10   2   9    2.52    0.35
 -11   2  10    5.34    0.46
 -11   2  10    4.85    0.51
 -12   2  11    0.97    0.30
 -12   2  11    0.58    0.25
 -13   2  12    5.02    0.54
 -12  -1  12    0.31    0.28
 -11  -1  11    1.77    0.35
 -10  -1  10    0.68    0.27
  -9  -1   9    0.08    0.20
  -8  -1   8    5.94    0.44
  -7  -1   7    0.08    0.15
  -7  -1   7    0.22    0.18
  -6  -1   6   16.88    0.59
  -6  -1   6   17.61    0.60
  -5  -1   5   14.94    0.50
  -5  -1   5   15.41    0.50
  -4  -1   4   25.76    0.62
  -4  -1   4   25.16    0.61
  -3  -1   3   22.79    0.51
  -3  -1   3   22.90    0.52
  -2  -1   2    0.83    0.12
  -1  -1   1   29.67    0.48
   0  -1   0   23.73    0.33
   0   1   0   23.43    0.35
   0   1   0   23.94    0.31
  -1   1   1   45.44    0.58
  -1   1   1   44.73    0.64
  -1   1   1   43.67    0.58
  -2   1   2    2.28    0.13
  -2   1   2    2.26    0.15
  -3   1   3   13.22    0.33
  -3   1   3   13.38    0.36
  -4   1   4    0.27    0.10
  -4   1   4    0.43    0.11
  -5   1   5    3.14    0.24
  -5   1   5    3.49    0.26
  -6   1   6    1.42    0.21
  -6   1   6    1.69    0.22
  -7   1   7    0.85    0.20
  -7   1   7    1.31    0.22
  -8   1   8   11.87    0.55
  -8   1   8   11.09    0.52
  -9   1   9    0.44    0.20
  -9   1   9    0.26    0.18
 -10   1  10    4.25    0.45
 -10   1  10    3.78    0.41
 -11   1  11   -0.09    0.20
 -11   1  11    0.00    0.22
 -12   1  12    2.82    0.41
 -12   0  11    0.32    0.26
 -11   0  10    6.33    0.52
 -10   0   9    0.14    0.21
  -9   0   8    0.58    0.22
  -9   0   8    0.42    0.22
  -8   0   7   -0.05    0.16
  -8   0   7   -0.15    0.15
  -7   0   6   11.02    0.50
  -7   0   6    9.49    0.47
  -6   0   5    0.05    0.13
  -6   0   5    0.11    0.12
  -5   0   4    2.01    0.22
  -5   0   4    1.53    0.19
  -4   0   3    0.24    0.10
  -4   0   3    0.07    0.09
  -3   0   2    0.71    0.12
  -3   0   2    0.71    0.11
  -2   0   1   85.47    1.19
  -2   0   1   85.35    1.17
  -1   0   0    1.74    0.08
  -1   0   0    1.62    0.05
  -1   0   2   23.00    0.38
  -2   0   3    0.07    0.07
  -2   0   3    0.05    0.08
  -3   0   4    0.33    0.10
  -3   0   4    0.11    0.09
  -4   0   5  129.43    1.91
  -4   0   5  128.40    1.89
  -5   0   6   56.05    1.08
  -5   0   6   58.82    1.12
  -6   0   7   -0.05    0.11
  -6   0   7   -0.13    0.13
  -7   0   8   12.21    0.53
  -7   0   8   11.74    0.52
  -8   0   9    0.74    0.22
  -8   0   9    0.82    0.22
  -9   0  10    0.20    0.20
  -9   0  10   -0.18    0.15
 -10   0  11    1.46    0.30
 -10   0  11    2.08    0.34
 -11   0  12    2.06    0.37
 -12   0  13    0.18    0.25
 -13   1  11    0.60    0.29
 -12   1  10    6.39    0.53
 -11   1   9   13.23    0.67
 -10   1   8    0.80    0.26
 -10   1   8    0.96    0.26
  -9   1   7    0.07    0.16
  -9   1   7    0.09    0.16
  -8   1   6    3.82    0.36
  -8   1   6    4.14    0.36
  -7   1   5   14.02    0.53
  -7   1   5   14.32    0.53
  -6   1   4   32.63    0.76
  -6   1   4   31.31    0.76
  -5   1   3    0.83    0.15
  -5   1   3    1.02    0.16
  -4   1   2   65.09    1.06
  -4   1   2   65.49    1.06
  -3   1   1   53.04    0.83
  -3   1   1   53.27    0.75
  -3   1   1   53.48    0.84
  -2   1   0  138.33    1.74
  -2   1   0  136.35    1.78
  -2   1   0  138.03    1.61
  -1   1  -1   26.61    0.38
  -1   1  -1   27.58    0.36
   1  -1   1   26.96    0.42
   0  -1   2    0.10    0.07
   0  -1   2    0.00    0.03
  -1  -1   3    1.88    0.14
  -1  -1   3    1.37    0.11
  -2  -1   4   59.42    0.96
  -2  -1   4   60.54    0.93
  -3  -1   5    3.48    0.24
  -3  -1   5    2.85    0.19
  -4  -1   6    0.56    0.14
  -4  -1   6    0.29    0.12
  -5  -1   7    2.80    0.27
  -5  -1   7    2.78    0.25
  -6  -1   8   18.65    0.64
  -6  -1   8   19.43    0.65
  -7  -1   9   17.01    0.65
  -7  -1   9   16.06    0.64
  -8  -1  10    0.02    0.16
  -8  -1  10    0.25    0.19
  -9  -1  11    3.19    0.40
  -9  -1  11    3.04    0.40
 -10  -1  12    8.68    0.58
 -11  -1  13    1.63    0.36
 -12  -1  14    0.15    0.27
 -13   2  10    0.70    0.28
 -12   2   9    3.14    0.42
 -11   2   8   11.59    0.62
 -11   2   8   12.55    0.66
 -10   2   7    3.08    0.36
 -10   2   7    3.19    0.37
  -9   2   6    5.34    0.40
  -9   2   6    3.73    0.36
  -8   2   5    3.54    0.30
  -8   2   5    3.45    0.33
  -7   2   4   40.41    0.92
  -7   2   4   38.75    0.89
  -6   2   3    5.35    0.30
  -6   2   3    5.66    0.31
  -5   2   2   18.48    0.44
  -5   2   2   18.78    0.49
  -5   2   2   18.84    0.50
  -4   2   1   41.21    0.68
  -4   2   1   41.91    0.74
  -4   2   1   40.70    0.73
  -3   2   0    3.69    0.17
  -3   2   0    4.04    0.18
  -3   2   0    3.82    0.19
  -2   2  -1   18.18    0.35
  -2   2  -1   18.01    0.32
   2  -2   1   17.34    0.36
  -1   2  -2  157.65    1.86
  -1   2  -2  161.98    1.91
   1  -2   2  155.68    2.05
   0  -2   3  307.02    4.00
  -1  -2   4   12.83    0.36
  -1  -2   4   12.65    0.30
  -2  -2   5  120.61    1.75
  -2  -2   5  119.55    1.68
  -3  -2   6   57.65    1.06
  -3  -2   6   57.90    1.02
  -4  -2   7    1.58    0.21
  -4  -2   7    1.35    0.19
  -5  -2   8   14.84    0.53
  -5  -2   8   14.64    0.55
  -6  -2   9   16.56    0.62
  -6  -2   9   16.41    0.63
  -7  -2  10    1.54    0.28
  -7  -2  10    1.54    0.26
  -8  -2  11    0.92    0.26
  -9  -2  12   15.69    0.75
 -10  -2  13    7.64    0.59
 -11  -2  14    1.02    0.32
 -13   3   9    2.34    0.39
 -12   3   8    7.71    0.56
 -12   3   8    8.37    0.55
 -11   3   7    9.78    0.57
 -11   3   7   10.73    0.57
 -10   3   6    2.80    0.34
 -10   3   6    2.73    0.34
  -9   3   5    0.05    0.16
  -9   3   5    0.60    0.20
  -8   3   4    1.51    0.24
  -8   3   4    1.97    0.26
  -7   3   3   20.85    0.59
  -7   3   3   19.70    0.61
  -7   3   3   19.91    0.55
  -6   3   2   16.33    0.48
  -6   3   2   16.02    0.45
  -6   3   2   16.00    0.49
  -5   3   1   59.62    0.97
  -5   3   1   62.27    1.03
  -5   3   1   61.33    1.03
  -4   3   0    4.10    0.21
  -4   3   0    4.02    0.22
  -4   3   0    3.83    0.20
  -3   3  -1   61.05    0.89
  -3   3  -1   60.19    0.89
   3  -3   1   59.39    0.92
  -2   3  -2   73.20    0.97
  -2   3  -2   73.62    1.01
   2  -3   2   71.62    1.09
  -1   3  -3    0.02    0.08
  -1   3  -3    0.17    0.09
   0   3  -4  108.37    1.41
   0  -3   4  108.76    1.54
  -1  -3   5    8.75    0.33
  -2  -3   6  106.21    1.64
  -3  -3   7   19.55    0.58
  -4  -3   8    0.12    0.15
  -5  -3   9   33.82    0.90
  -6  -3  10    8.76    0.51
  -7  -3  11    0.68    0.24
  -8  -3  12    6.34    0.49
  -9  -3  13   13.93    0.74
 -10  -3  14    0.25    0.27
 -11  -3  15    0.09    0.27
 -13   4   8    6.38    0.54
 -13   4   8    5.83    0.51
 -12   4   7    4.84    0.49
 -12   4   7    5.28    0.45
 -11   4   6    5.97    0.46
 -11   4   6    5.47    0.43
 -10   4   5    0.51    0.21
 -10   4   5    0.71    0.21
  -9   4   4    9.93    0.49
  -9   4   4    9.58    0.47
  -8   4   3   11.98    0.49
  -8   4   3   12.45    0.49
  -8   4   3   11.56    0.46
  -7   4   2    0.34    0.14
  -7   4   2    0.41    0.14
  -7   4   2    0.59    0.16
  -6   4   1  125.57    1.86
  -6   4   1  127.05    1.78
  -6   4   1  124.25    1.87
  -5   4   0   99.16    1.47
  -5   4   0   98.13    1.42
  -5   4   0   97.17    1.46
  -4   4  -1    0.38    0.10
  -4   4  -1    0.14    0.08
   4  -4   1    0.28    0.12
  -3   4  -2   41.52    0.73
  -3   4  -2   43.03    0.67
   3  -4   2   42.76    0.76
  -2   4  -3  100.49    1.35
  -2   4  -3   98.64    1.31
   2  -4   3   95.98    1.43
  -1   4  -4  176.89    2.22
  -1   4  -4  179.22    2.20
   1  -4   4  172.98    2.36
   0   4  -5  164.74    2.08
   0  -4   5  160.53    2.25
  -1  -4   6    4.15    0.28
  -2  -4   7   40.13    0.86
  -3  -4   8    5.28    0.34
  -4  -4   9   23.08    0.73
  -5  -4  10   64.96    1.40
  -6  -4  11   -0.32    0.16
  -7  -4  12    4.70    0.46
  -8  -4  13    8.78    0.58
  -9  -4  14    7.21    0.59
 -10  -4  15    0.40    0.30
 -14   5   8    3.51    0.49
 -13   5   7   20.06    0.88
 -12   5   6    1.08    0.27
 -12   5   6    1.36    0.29
 -11   5   5    0.07    0.18
 -11   5   5    0.30    0.19
 -10   5   4    3.17    0.33
 -10   5   4    3.18    0.35
  -9   5   3    0.87    0.20
  -9   5   3    0.83    0.21
  -9   5   3    0.91    0.20
  -8   5   2    3.35    0.29
  -8   5   2    3.46    0.29
  -8   5   2    3.04    0.29
  -7   5   1    1.96    0.22
  -7   5   1    1.92    0.23
  -7   5   1    1.93    0.22
  -6   5   0   68.31    1.17
  -6   5   0   68.61    1.17
   6  -5   0   68.95    1.15
  -5   5  -1  126.94    1.80
  -5   5  -1  125.69    1.77
   5  -5   1  124.75    1.80
  -4   5  -2    1.11    0.15
  -4   5  -2    1.14    0.13
   4  -5   2    0.92    0.19
  -3   5  -3  204.27    2.56
  -3   5  -3  197.43    2.53
   3  -5   3  200.27    2.71
  -2   5  -4   31.23    0.63
  -2   5  -4   30.75    0.56
   2  -5   4   29.90    0.64
  -1   5  -5    3.15    0.22
  -1   5  -5    3.33    0.21
   1  -5   5    3.24    0.26
   0   5  -6    5.60    0.27
   0   5  -6    5.79    0.25
   0  -5   6    5.67    0.30
   1   5  -7   36.35    0.73
  -1  -5   7   36.96    0.82
  -2  -5   8   10.85    0.46
  -3  -5   9    1.61    0.25
  -4  -5  10   16.51    0.64
  -5  -5  11   10.74    0.56
  -6  -5  12    2.26    0.34
  -7  -5  13    3.68    0.44
  -8  -5  14   13.99    0.76
  -9  -5  15    8.65    0.65
 -14   6   7    8.34    0.62
 -13   6   6    3.13    0.43
 -12   6   5   -0.14    0.17
 -11   6   4    6.57    0.45
 -11   6   4    6.15    0.45
 -10   6   3    1.81    0.27
 -10   6   3    2.01    0.29
 -10   6   3    1.81    0.27
  -9   6   2    8.94    0.45
  -9   6   2    8.10    0.43
  -9   6   2    7.86    0.43
  -8   6   1    1.80    0.24
  -8   6   1    1.50    0.23
  -8   6   1    1.66    0.22
   8  -6  -1    1.85    0.25
  -7   6   0   44.33    0.93
  -7   6   0   44.00    0.91
   7  -6   0   43.01    0.88
  -6   6  -1   55.66    1.00
  -6   6  -1   51.97    1.01
   6  -6   1   51.79    0.98
  -5   6  -2   14.50    0.48
  -5   6  -2   14.91    0.42
   5  -6   2   14.68    0.49
  -4   6  -3   43.70    0.75
  -4   6  -3   41.99    0.84
   4  -6   3   43.87    0.88
  -3   6  -4   41.69    0.72
  -3   6  -4   42.66    0.83
   3  -6   4   42.22    0.84
  -2   6  -5   11.77    0.40
  -2   6  -5   11.26    0.36
   2  -6   5   11.36    0.42
  -1   6  -6    1.88    0.19
  -1   6  -6    2.12    0.19
   1  -6   6    2.14    0.23
   0   6  -7   23.73    0.59
   0   6  -7   23.94    0.55
   0  -6   7   23.80    0.64
   1   6  -8    4.64    0.31
  -1  -6   8    5.38    0.36
   2   6  -9    2.82    0.26
  -2  -6   9    2.91    0.30
  -3  -6  10   40.73    1.05
  -4  -6  11   32.40    0.96
  -5  -6  12    3.38    0.40
  -6  -6  13   -0.02    0.21
  -7  -6  14    6.30    0.54
  -8  -6  15    3.37    0.48
  -9  -6  16    2.15    0.43
 -14   7   6    0.05    0.22
 -13   7   5    4.58    0.49
 -12   7   4    0.20    0.20
 -11   7   3    4.89    0.40
 -11   7   3    5.92    0.44
 -10   7   2    1.28    0.24
 -10   7   2    0.91    0.23
  10  -7  -2    1.25    0.25
  -9   7   1    0.72    0.19
  -9   7   1    0.60    0.19
   9  -7  -1    0.70    0.20
  -8   7   0   33.47    0.81
  -8   7   0   33.78    0.84
   8  -7   0   33.99    0.80
  -7   7  -1    3.91    0.32
  -7   7  -1    4.06    0.27
   7  -7   1    4.07    0.36
  -6   7  -2    0.54    0.16
  -6   7  -2    0.40    0.14
   6  -7   2    0.38    0.23
  -5   7  -3    0.14    0.12
  -5   7  -3    0.00    0.10
   5  -7   3    0.16    0.24
  -4   7  -4    7.27    0.37
  -4   7  -4    7.63    0.29
   4  -7   4    8.00    0.45
  -3   7  -5   13.13    0.40
  -3   7  -5   13.38    0.46
   3  -7   5   13.64    0.49
  -2   7  -6    8.51    0.35
  -2   7  -6    8.53    0.39
   2  -7   6    8.34    0.39
  -1   7  -7   21.99    0.54
  -1   7  -7   21.81    0.60
   1  -7   7   22.26    0.63
   0   7  -8   15.61    0.49
   0   7  -8   15.23    0.51
   0  -7   8   15.57    0.56
   1   7  -9    3.48    0.30
   1   7  -9    3.25    0.28
  -1  -7   9    3.45    0.33
   2   7 -10   -0.05    0.15
  -2  -7  10    0.15    0.19
   3   7 -11   23.05    0.70
  -3  -7  11   22.80    0.79
   4   7 -12    0.87    0.21
  -4  -7  12    0.59    0.25
   5   7 -13    0.06    0.17
  -5  -7  13   -0.16    0.18
  -6  -7  14    0.06    0.23
  -7  -7  15    4.13    0.52
  -8  -7  16    2.08    0.42
 -14   8   5    0.29    0.24
 -13   8   4    0.39    0.23
 -12   8   3    1.28    0.28
 -11   8   2    3.04    0.36
 -11   8   2    3.15    0.37
 -10   8   1    6.20    0.43
 -10   8   1    6.17    0.41
  -9   8   0    3.41    0.33
  -9   8   0    3.86    0.31
  -8   8  -1   10.45    0.50
  -8   8  -1   10.58    0.44
   8  -8   1   10.53    0.48
  -7   8  -2    3.81    0.29
  -7   8  -2    3.57    0.33
   7  -8   2    3.82    0.38
  -6   8  -3    2.57    0.28
  -6   8  -3    2.69    0.23
   6  -8   3    2.68    0.36
  -5   8  -4   23.86    0.68
  -5   8  -4   23.69    0.56
   5  -8   4   26.41    0.73
  -4   8  -5    8.32    0.34
  -4   8  -5    8.35    0.40
   4  -8   5    8.12    0.45
  -3   8  -6    3.83    0.31
  -3   8  -6    4.02    0.30
   3  -8   6    3.59    0.32
  -2   8  -7    5.53    0.35
  -2   8  -7    5.06    0.35
   2  -8   7    5.55    0.39
  -1   8  -8    0.53    0.18
  -1   8  -8    0.53    0.20
   1  -8   8    0.50    0.20
   0   8  -9    4.37    0.32
   0   8  -9    5.59    0.38
   0  -8   9    5.18    0.39
   1   8 -10    0.75    0.18
   1   8 -10    1.05    0.22
  -1  -8  10    1.13    0.23
   2   8 -11    0.16    0.15
   2   8 -11   -0.05    0.15
  -2  -8  11   -0.08    0.18
   3   8 -12    4.09    0.36
  -3  -8  12    4.00    0.42
   4   8 -13    2.26    0.31
  -4  -8  13    2.00    0.34
   5   8 -14    1.43    0.27
  -5  -8  14    1.33    0.32
   6   8 -15   -0.07    0.19
  -6  -8  15   -0.01    0.25
  -7  -8  16    1.68    0.39
 -12   9   2    0.15    0.19
 -12   9   2    0.14    0.20
 -11   9   1    1.21    0.27
 -11   9   1    0.63    0.21
 -10   9   0   -0.10    0.15
 -10   9   0   -0.02    0.16
  -9   9  -1    1.84    0.25
  -9   9  -1    1.94    0.29
  -8   9  -2    0.70    0.20
  -8   9  -2    0.75    0.18
  -7   9  -3    2.92    0.26
  -7   9  -3    3.17    0.32
   7  -9   3    3.08    0.36
  -6   9  -4    6.15    0.32
  -6   9  -4    7.22    0.42
   6  -9   4    6.90    0.52
  -5   9  -5    0.21    0.13
  -5   9  -5   -0.03    0.14
   5  -9   5    0.09    0.24
  -4   9  -6   13.88    0.44
  -4   9  -6   13.30    0.54
   4  -9   6   14.64    0.55
  -3   9  -7    0.72    0.21
  -3   9  -7    1.32    0.23
   3  -9   7    1.35    0.26
  -2   9  -8    0.00    0.16
  -2   9  -8    0.01    0.19
   2  -9   8   -0.16    0.19
  -1   9  -9    7.44    0.43
  -1   9  -9    7.35    0.41
   1  -9   9    7.46    0.44
   0   9 -10   -0.05    0.15
   0   9 -10    0.25    0.19
   0  -9  10   -0.24    0.16
   1   9 -11    0.32    0.19
   1   9 -11    0.20    0.17
  -1  -9  11    0.39    0.22
   2   9 -12    0.50    0.20
   2   9 -12    0.91    0.24
  -2  -9  12    0.50    0.24
   3   9 -13   -0.04    0.18
   3   9 -13    0.22    0.20
  -3  -9  13    0.07    0.20
   4   9 -14    4.24    0.41
   4   9 -14    3.82    0.40
  -4  -9  14    4.11    0.47
   5   9 -15    3.24    0.38
  -5  -9  15    3.62    0.49
   6   9 -16    5.69    0.50
  -6  -9  16    6.49    0.57
 -13  10   2    0.21    0.22
 -12  10   1    0.08    0.21
 -11  10   0    0.24    0.19
 -10  10  -1    0.20    0.19
  -9  10  -2   -0.23    0.15
  -8  10  -3   -0.03    0.16
  -7  10  -4    2.58    0.31
  -6  10  -5    1.97    0.29
   6 -10   5    1.64    0.30
  -5  10  -6    2.36    0.29
   5 -10   6    1.63    0.27
  -4  10  -7    2.27    0.30
   4 -10   7    2.66    0.31
  -3  10  -8   11.71    0.54
   3 -10   8   12.87    0.54
  -2  10  -9    6.86    0.43
   2 -10   9    6.74    0.44
  -1  10 -10    7.21    0.45
   1 -10  10    6.63    0.44
   0  10 -11    0.22    0.19
   0 -10  11    0.07    0.20
   1  10 -12   -0.08    0.16
  -1 -10  12    0.02    0.21
   2  10 -13    0.17    0.19
  -2 -10  13    0.37    0.24
   3  10 -14    1.23    0.27
  -3 -10  14    0.85    0.30
   4  10 -15    0.03    0.19
  -4 -10  15   -0.01    0.24
   5  10 -16    0.72    0.27
  -5 -10  16    0.80    0.33
 -13  11   1    1.18    0.32
 -12  11   0    0.59    0.26
 -11  11  -1    0.57    0.25
 -10  11  -2    0.00    0.19
  -9  11  -3    1.92    0.31
  -8  11  -4    0.10    0.17
  -7  11  -5    0.04    0.18
  -6  11  -6    0.12    0.18
  -5  11  -7   -0.02    0.15
   5 -11   7   -0.29    0.19
  -4  11  -8    3.66    0.37
   4 -11   8    3.31    0.35
  -3  11  -9    1.49    0.26
   3 -11   9    1.38    0.28
  -2  11 -10    5.36    0.42
   2 -11  10    4.81    0.41
  -1  11 -11   11.43    0.57
   1 -11  11   11.69    0.59
   0  11 -12    1.02    0.26
   0 -11  12    0.65    0.26
   1  11 -13    0.68    0.24
  -1 -11  13    1.18    0.30
   2  11 -14    0.25    0.22
  -2 -11  14    0.07    0.22
   3  11 -15    0.55    0.25
  -3 -11  15    0.84    0.31
   4  11 -16    0.02    0.21
  -4 -11  16    0.15    0.27
 -12  12  -1    4.10    0.46
 -11  12  -2    2.04    0.34
 -10  12  -3    0.26    0.22
  -9  12  -4    7.21    0.52
  -8  12  -5    2.19    0.34
  -7  12  -6   -0.09    0.16
  -6  12  -7    2.22    0.33
  -5  12  -8    7.95    0.50
  -4  12  -9    2.26    0.31
  -3  12 -10    0.21    0.20
   3 -12  10    0.14    0.23
  -2  12 -11    4.14    0.41
   2 -12  11    4.25    0.43
  -1  12 -12    0.52    0.23
   1 -12  12    0.62    0.26
   0  12 -13    1.81    0.31
   0 -12  13    1.46    0.32
   1  12 -14    1.36    0.30
  -1 -12  14    0.80    0.31
   2  12 -15    0.36    0.24
  -2 -12  15    0.34    0.28
   3  12 -16   -0.28    0.23
  -3 -12  16    0.18    0.28
 -12  13  -2    4.42    0.49
 -11  13  -3    0.19    0.23
 -10  13  -4    8.02    0.58
  -9  13  -5    6.96    0.54
  -8  13  -6    0.72    0.26
  -7  13  -7    3.07    0.39
  -6  13  -8    0.63    0.25
  -5  13  -9    3.34    0.40
  -4  13 -10    0.17    0.21
  -3  13 -11    9.94    0.59
  -2  13 -12    6.71    0.52
   2 -13  12    8.73    0.57
  -1  13 -13    0.24    0.23
   1 -13  13    0.18    0.25
   0  13 -14   -0.21    0.20
   0 -13  14   -0.17    0.23
   1  13 -15    1.35    0.32
  -1 -13  15    0.98    0.34
   2  13 -16    1.73    0.38
  -2 -13  16    1.78    0.40
 -11  14  -4    5.60    0.56
 -10  14  -5    2.33    0.38
  -9  14  -6    0.29    0.24
  -8  14  -7   -0.06    0.20
  -7  14  -8    7.80    0.57
  -6  14  -9    7.39    0.56
  -5  14 -10    0.54    0.27
  -4  14 -11    8.22    0.56
  -3  14 -12    6.66    0.53
  -2  14 -13   -0.05    0.22
  -1  14 -14    1.24    0.32
   0  14 -15    3.21    0.44
   0 -14  15    3.44    0.48
  -9  15  -7    0.27    0.27
  -8  15  -8    3.49    0.45
  -7  15  -9    0.69    0.31
  -6  15 -10    2.85    0.43
  -5  15 -11   -0.31    0.22
  -4  15 -12    5.51    0.56
  -3  15 -13    1.45    0.35
  -2  15 -14    1.10    0.33
  -4  16 -10    6.67    0.60
  -5  16  -9    1.61    0.36
  -6  16  -8    0.95    0.31
  -7  16  -7    5.34    0.55
  -1  15 -12    2.20    0.36
  -2  15 -11   -0.21    0.20
  -3  15 -10    8.46    0.60
  -4  15  -9    5.68    0.54
  -5  15  -8    0.73    0.30
  -6  15  -7    1.86    0.35
  -7  15  -6    1.29    0.32
  -8  15  -5    4.68    0.51
  -9  15  -4    4.22    0.49
 -10  15  -3    0.76    0.30
   1  14 -13    0.36    0.28
   0  14 -12    1.83    0.34
  -1  14 -11   -0.08    0.21
  -2  14 -10    0.29    0.24
  -3  14  -9    4.72    0.47
  -4  14  -8    3.66    0.42
  -5  14  -7    0.58    0.25
  -6  14  -6    4.04    0.45
  -7  14  -5    9.39    0.58
  -8  14  -4    0.31    0.23
  -9  14  -3    6.04    0.55
 -10  14  -2    0.44    0.25
 -11  14  -1    0.08    0.24
  -3 -13  14    0.25    0.28
  -2 -13  13    2.61    0.42
   2  13 -13    3.05    0.40
  -1 -13  12   18.02    0.80
   1  13 -12   17.94    0.76
   0 -13  11    0.55    0.27
   0  13 -11    0.80    0.26
  -1  13 -10    0.53    0.23
  -2  13  -9    4.67    0.43
  -3  13  -8    9.41    0.56
  -4  13  -7    1.73    0.30
  -5  13  -6    1.46    0.28
  -6  13  -5    3.95    0.41
  -7  13  -4    7.52    0.52
  -8  13  -3    0.03    0.20
  -9  13  -2    7.23    0.53
 -10  13  -1    1.31    0.31
 -11  13   0    0.26    0.22
 -12  13   1   10.30    0.67
  -4 -12  14    1.99    0.40
  -3 -12  13    0.21    0.26
   3  12 -13   -0.15    0.21
  -2 -12  12    7.18    0.54
   2  12 -12    6.75    0.50
  -1 -12  11    6.32    0.48
   1  12 -11    5.66    0.44
   0 -12  10    1.91    0.32
   0  12 -10    1.76    0.29
   1 -12   9   13.50    0.59
  -1  12  -9   14.12    0.62
  -2  12  -8   13.19    0.60
  -3  12  -7    0.80    0.24
  -4  12  -6    0.09    0.19
  -5  12  -5   23.04    0.80
  -6  12  -4    7.98    0.51
  -7  12  -3    1.22    0.27
  -8  12  -2   12.16    0.63
  -9  12  -1    8.43    0.54
 -10  12   0    1.40    0.29
 -11  12   1    0.89    0.28
 -12  12   2    6.10    0.56
  -5 -11  14    0.29    0.28
   5  11 -14    0.51    0.28
  -4 -11  13    0.70    0.28
   4  11 -13    0.92    0.32
  -3 -11  12    4.45    0.48
   3  11 -12    4.42    0.41
   3  11 -12    5.34    0.50
  -2 -11  11   14.71    0.69
   2  11 -11   14.48    0.69
   2  11 -11   15.01    0.63
  -1 -11  10   13.32    0.62
   1  11 -10   13.62    0.64
   1  11 -10   13.15    0.58
   0 -11   9    0.26    0.19
   0  11  -9    0.39    0.20
   0  11  -9    0.46    0.26
   1 -11   8   28.21    0.81
  -1  11  -8   28.51    0.86
  -1  11  -8   28.51    0.84
   2 -11   7   12.89    0.52
  -2  11  -7   13.17    0.57
  -2  11  -7   13.52    0.62
  -3  11  -6   10.20    0.50
  -3  11  -6    7.97    0.51
  -4  11  -5   27.33    0.80
  -4  11  -5   28.30    0.84
  -5  11  -4   59.63    1.24
  -5  11  -4   62.49    1.34
  -6  11  -3    0.26    0.19
  -6  11  -3    0.22    0.19
  -7  11  -2    7.06    0.43
  -7  11  -2    6.99    0.45
  -8  11  -1    7.52    0.47
  -8  11  -1    8.00    0.50
  -9  11   0    4.86    0.42
  -9  11   0    4.42    0.41
 -10  11   1    0.76    0.23
 -10  11   1    0.78    0.25
 -11  11   2    5.33    0.50
 -11  11   2    5.41    0.46
 -12  11   3   15.95    0.77
  -6 -10  14    2.44    0.45
   6  10 -14    2.50    0.41
  -5 -10  13    1.68    0.36
   5  10 -13    1.76    0.35
  -4 -10  12   -0.24    0.20
   4  10 -12    0.30    0.24
   4  10 -12    0.18    0.19
  -3 -10  11    9.39    0.56
   3  10 -11    9.19    0.56
   3  10 -11    8.95    0.49
  -2 -10  10    7.44    0.49
   2  10 -10    6.82    0.43
   2  10 -10    6.94    0.49
  -1 -10   9    0.46    0.21
   1  10  -9    0.62    0.26
   1  10  -9    0.88    0.22
   0 -10   8   18.39    0.65
   0  10  -8   19.27    0.68
   0  10  -8   18.29    0.62
   1 -10   7    6.29    0.39
  -1  10  -7    5.59    0.46
  -1  10  -7    5.46    0.38
   2 -10   6    0.86    0.19
  -2  10  -6    0.76    0.20
  -2  10  -6    1.14    0.29
   3 -10   5    0.15    0.14
  -3  10  -5    0.38    0.24
  -3  10  -5    0.23    0.17
  -4  10  -4    5.69    0.38
  -4  10  -4    5.49    0.41
  -5  10  -3   28.06    0.77
  -5  10  -3   28.74    0.81
  -6  10  -2    8.18    0.44
  -6  10  -2    8.97    0.48
  -7  10  -1   25.68    0.81
  -7  10  -1   24.53    0.75
  -8  10   0    3.25    0.34
  -8  10   0    3.49    0.36
  -9  10   1    0.13    0.18
  -9  10   1    0.14    0.19
 -10  10   2    4.14    0.41
 -10  10   2    3.67    0.40
 -11  10   3    2.79    0.38
 -11  10   3    2.97    0.39
 -12  10   4    3.72    0.44
 -13  10   5    0.06    0.22
  -7  -9  14    5.02    0.58
   7   9 -14    5.54    0.57
  -6  -9  13   10.52    0.69
   6   9 -13   11.99    0.68
  -5  -9  12    0.90    0.29
   5   9 -12    0.95    0.28
   5   9 -12    0.75    0.22
  -4  -9  11    0.85    0.27
   4   9 -11    0.70    0.26
   4   9 -11    1.13    0.23
  -3  -9  10    9.61    0.55
   3   9 -10    7.59    0.44
   3   9 -10    8.89    0.53
  -2  -9   9   13.37    0.60
   2   9  -9   15.28    0.56
   2   9  -9   12.92    0.59
  -1  -9   8   12.50    0.54
   1   9  -8   13.18    0.57
   1   9  -8   12.27    0.50
   0  -9   7    0.21    0.17
   0   9  -7    0.25    0.23
   0   9  -7    0.16    0.15
   1  -9   6    7.20    0.38
  -1   9  -6    8.14    0.42
  -1   9  -6    7.88    0.49
   2  -9   5    7.94    0.36
  -2   9  -5    8.29    0.47
  -2   9  -5    8.05    0.41
   3  -9   4    5.97    0.30
  -3   9  -4    5.90    0.41
  -3   9  -4    6.18    0.38
   4  -9   3    8.19    0.31
  -4   9  -3    7.69    0.44
  -4   9  -3    7.36    0.40
  -5   9  -2    6.17    0.38
  -5   9  -2    5.92    0.36
  -6   9  -1   19.58    0.66
  -6   9  -1   18.19    0.62
  -7   9   0    8.97    0.46
  -7   9   0    9.75    0.49
  -8   9   1   11.55    0.54
  -8   9   1   10.60    0.51
  -9   9   2    0.68    0.21
  -9   9   2    0.76    0.22
 -10   9   3    0.19    0.18
 -10   9   3   -0.16    0.17
 -11   9   4   -0.10    0.17
 -11   9   4    0.11    0.19
 -12   9   5    0.34    0.24
 -13   9   6   -0.25    0.20
  -8  -8  14    0.04    0.26
  -7  -8  13    1.55    0.37
  -6  -8  12    2.48    0.41
  -5  -8  11    0.18    0.21
   5   8 -11    0.19    0.17
  -4  -8  10    2.60    0.35
   4   8 -10    2.69    0.35
   4   8 -10    2.79    0.29
  -3  -8   9   -0.04    0.17
   3   8  -9    0.13    0.19
   3   8  -9    0.35    0.17
  -2  -8   8    0.81    0.21
   2   8  -8    1.05    0.19
   2   8  -8    1.13    0.26
  -1  -8   7    2.10    0.26
   1   8  -7    1.98    0.23
   1   8  -7    2.16    0.29
   0  -8   6    7.34    0.38
   0   8  -6    6.88    0.42
   0   8  -6    6.99    0.37
   1  -8   5    1.38    0.20
  -1   8  -5    1.01    0.25
  -1   8  -5    1.35    0.20
   2  -8   4    1.26    0.17
  -2   8  -4    0.99    0.24
  -2   8  -4    1.17    0.19
   3  -8   3    0.43    0.13
  -3   8  -3    0.39    0.15
  -3   8  -3    0.32    0.20
   4  -8   2    3.42    0.23
  -4   8  -2    3.40    0.30
  -4   8  -2    2.86    0.26
   5  -8   1    5.36    0.29
  -5   8  -1    5.47    0.35
  -5   8  -1    5.50    0.33
  -6   8   0    2.92    0.29
  -6   8   0    2.56    0.28
  -7   8   1    2.24    0.28
  -7   8   1    1.47    0.23
  -8   8   2    5.86    0.38
  -8   8   2    5.50    0.39
  -9   8   3    0.59    0.20
  -9   8   3    0.51    0.20
 -10   8   4    2.21    0.31
 -10   8   4    1.45    0.27
 -11   8   5    2.27    0.34
 -12   8   6    0.00    0.20
 -13   8   7    1.04    0.31
  -9  -7  14    1.20    0.38
  -8  -7  13    2.71    0.43
  -7  -7  12    0.15    0.23
  -6  -7  11    0.35    0.22
   6   7 -11    0.54    0.19
  -5  -7  10    6.22    0.48
   5   7 -10    6.08    0.37
  -4  -7   9   11.88    0.57
   4   7  -9   12.09    0.47
  -3  -7   8    6.67    0.44
   3   7  -8    6.50    0.44
   3   7  -8    8.00    0.38
  -2  -7   7    0.39    0.17
   2   7  -7    0.47    0.20
   2   7  -7    0.67    0.16
  -1  -7   6    5.54    0.34
   1   7  -6    5.86    0.38
   1   7  -6    5.69    0.31
   0  -7   5   20.07    0.56
   0   7  -5   19.47    0.58
   0   7  -5   19.86    0.54
   1  -7   4   46.99    0.86
  -1   7  -4   46.93    0.92
  -1   7  -4   45.76    0.87
   2  -7   3    0.05    0.10
  -2   7  -3    0.08    0.11
  -2   7  -3    0.09    0.17
   3  -7   2    5.74    0.24
  -3   7  -2    4.95    0.35
  -3   7  -2    5.89    0.30
   4  -7   1    4.93    0.24
  -4   7  -1    4.59    0.31
  -4   7  -1    4.42    0.28
   5  -7   0    4.12    0.28
  -5   7   0    4.75    0.32
  -5   7   0    3.78    0.28
   6  -7  -1   13.85    0.41
  -6   7   1   14.96    0.52
  -6   7   1   14.39    0.52
   7  -7  -2   14.79    0.43
  -7   7   2   14.82    0.55
  -7   7   2   15.40    0.57
  -8   7   3   -0.09    0.15
  -8   7   3   -0.08    0.15
  -9   7   4    5.96    0.42
  -9   7   4    5.53    0.41
 -10   7   5    1.41    0.27
 -11   7   6    3.32    0.39
 -12   7   7    0.74    0.28
 -13   7   8    5.61    0.57
 -10  -6  14    0.20    0.28
  -9  -6  13    0.23    0.25
  -8  -6  12    1.56    0.34
  -7  -6  11    4.96    0.50
  -6  -6  10    0.94    0.26
  -5  -6   9    0.42    0.20
   5   6  -9    0.36    0.16
  -4  -6   8    9.90    0.52
   4   6  -8   10.33    0.41
  -3  -6   7   20.18    0.67
   3   6  -7   21.31    0.56
  -2  -6   6   12.63    0.48
   2   6  -6   11.82    0.47
   2   6  -6   12.48    0.40
  -1  -6   5    4.68    0.29
   1   6  -5    5.11    0.26
   1   6  -5    4.62    0.32
   0  -6   4   26.00    0.60
   0   6  -4   25.79    0.62
   0   6  -4   24.64    0.56
   1  -6   3    6.50    0.26
  -1   6  -3    7.09    0.36
  -1   6  -3    6.38    0.29
   2  -6   2    2.79    0.18
  -2   6  -2    2.69    0.22
  -2   6  -2    2.77    0.25
   3  -6   1    0.21    0.09
  -3   6  -1    0.22    0.14
  -3   6  -1    0.20    0.10
   4  -6   0    6.28    0.26
  -4   6   0    6.53    0.33
  -4   6   0    6.26    0.30
   5  -6  -1   23.44    0.46
  -5   6   1   23.28    0.61
  -5   6   1   23.35    0.62
   6  -6  -2   24.68    0.52
  -6   6   2   24.93    0.69
  -6   6   2   25.94    0.67
  -7   6   3   37.07    0.73
  -7   6   3   36.56    0.91
  -7   6   3   36.83    0.86
  -8   6   4    3.64    0.27
  -8   6   4    2.73    0.29
  -8   6   4    3.15    0.32
  -9   6   5   16.95    0.55
  -9   6   5   16.01    0.65
 -10   6   6    2.67    0.34
 -11   6   7    1.30    0.28
 -12   6   8    0.09    0.20
 -13   6   9    2.77    0.42
 -10  -5  13    2.95    0.47
  -9  -5  12    0.35    0.27
  -8  -5  11    6.75    0.52
  -7  -5  10    2.69    0.37
  -6  -5   9    0.14    0.18
  -5  -5   8   18.56    0.68
  -4  -5   7   46.15    1.07
  -3  -5   6   32.31    0.81
   3   5  -6   32.02    0.65
  -2  -5   5    1.14    0.18
   2   5  -5    1.32    0.15
  -1  -5   4   53.60    0.97
   1   5  -4   52.74    0.85
   1   5  -4   53.45    0.96
   0  -5   3    7.19    0.27
   0   5  -3    6.90    0.31
   0   5  -3    7.79    0.28
   1  -5   2    0.18    0.08
  -1   5  -2    0.03    0.13
  -1   5  -2    0.25    0.09
   2  -5   1    3.79    0.15
  -2   5  -1    4.60    0.30
  -2   5  -1    4.06    0.21
   3  -5   0   79.26    1.07
  -3   5   0   83.21    1.29
  -3   5   0   80.34    1.21
   4  -5  -1   38.10    0.59
  -4   5   1   37.80    0.74
  -4   5   1   37.55    0.77
  -5   5   2   33.08    0.71
  -5   5   2   32.18    0.58
  -5   5   2   32.97    0.75
  -6   5   3   77.80    1.32
  -6   5   3   80.27    1.42
  -6   5   3   77.69    1.21
  -7   5   4   19.82    0.60
  -7   5   4   20.25    0.66
  -7   5   4   21.10    0.54
  -8   5   5   10.64    0.50
  -8   5   5   10.59    0.42
  -9   5   6   21.19    0.74
  -9   5   6   21.12    0.64
 -10   5   7    5.41    0.38
 -10   5   7    4.73    0.40
 -11   5   8    2.15    0.36
 -12   5   9    1.05    0.30
 -13   5  10    2.53    0.42
 -11  -4  13    3.80    0.52
 -10  -4  12    0.22    0.23
  -9  -4  11    5.06    0.53
  -8  -4  10    1.10    0.29
  -7  -4   9   10.91    0.58
  -6  -4   8    1.04    0.25
  -5  -4   7   39.05    0.98
  -4  -4   6   45.91    1.01
  -3  -4   5    2.00    0.23
  -2  -4   4  173.01    2.45
   2   4  -4  173.37    2.13
  -1  -4   3   65.43    1.06
   1   4  -3   65.39    1.06
   1   4  -3   66.36    0.93
   0  -4   2    1.68    0.14
   0   4  -2    1.81    0.17
   0   4  -2    1.48    0.13
   1  -4   1   64.42    0.89
  -1   4  -1   64.34    1.01
  -1   4  -1   63.69    0.92
   2  -4   0   21.48    0.32
  -2   4   0   21.89    0.51
  -2   4   0   21.43    0.45
   3  -4  -1   16.64    0.29
  -3   4   1   16.99    0.42
  -3   4   1   17.32    0.45
  -4   4   2    4.85    0.24
  -4   4   2    4.34    0.17
  -4   4   2    4.58    0.26
  -5   4   3   39.28    0.70
  -5   4   3   39.48    0.78
  -5   4   3   40.43    0.85
  -6   4   4   50.06    1.07
  -6   4   4   51.41    0.97
  -6   4   4   50.69    0.90
  -7   4   5   20.57    0.67
  -7   4   5   22.38    0.58
  -8   4   6    3.41    0.29
  -8   4   6    3.08    0.32
  -9   4   7   22.67    0.79
  -9   4   7   23.43    0.70
 -10   4   8   10.81    0.60
 -10   4   8   10.36    0.50
 -11   4   9    3.92    0.44
 -11   4   9    3.40    0.38
 -12   4  10    3.21    0.44
 -13   4  11    0.69    0.28
 -11  -3  12    0.00    0.26
 -10  -3  11    2.12    0.37
  -9  -3  10    6.34    0.52
  -8  -3   9   10.89    0.60
  -7  -3   8    0.74    0.22
  -6  -3   7   50.78    1.18
  -5  -3   6   46.47    1.05
  -4  -3   5   33.76    0.80
  -3  -3   4   32.98    0.73
  -2  -3   3   67.08    1.11
  -1  -3   2    3.92    0.20
   1   3  -2    3.62    0.23
   1   3  -2    4.21    0.17
   0  -3   1    8.98    0.24
   0   3  -1    8.78    0.30
   0   3  -1    9.60    0.24
   1  -3   0  150.86    1.85
  -1   3   0  149.76    1.82
  -1   3   0  153.86    2.01
  -2   3   1   82.69    1.12
  -2   3   1   83.61    1.23
  -3   3   2   -0.06    0.05
  -3   3   2    0.01    0.10
  -3   3   2   -0.12    0.06
  -4   3   3   75.44    1.09
  -4   3   3   72.56    1.22
  -4   3   3   75.37    1.14
  -5   3   4   61.11    1.00
  -6   3   5    1.21    0.17
  -6   3   5    1.62    0.21
  -7   3   6   10.44    0.42
  -7   3   6   10.13    0.46
  -8   3   7    8.67    0.43
  -8   3   7    7.84    0.45
  -9   3   8   10.23    0.55
  -9   3   8    9.73    0.49
 -10   3   9    0.81    0.23
 -10   3   9    0.71    0.23
 -11   3  10    5.41    0.53
 -11   3  10    6.40    0.47
 -12   3  11    0.62    0.28
 -12   3  11    0.81    0.28
 -13   3  12    0.18    0.24
 -12  -2  12    3.24    0.49
 -11  -2  11    0.52    0.29
 -10  -2  10    8.56    0.57
  -9  -2   9   14.38    0.68
  -8  -2   8    0.36    0.20
  -7  -2   7   24.79    0.81
  -6  -2   6   12.47    0.52
  -5  -2   5    3.65    0.29
  -4  -2   4    1.27    0.18
  -3  -2   3   23.25    0.56
  -2  -2   2    6.65    0.26
  -1  -2   1   64.09    0.94
   1   2  -1   63.48    0.78
   1   2  -1   64.12    0.95
   0  -2   0   98.53    1.24
   0   2   0   95.73    1.29
   0   2   0   96.41    1.15
  -1   2   1    2.63    0.13
  -1   2   1    2.96    0.21
  -2   2   2   31.22    0.46
  -2   2   2   30.26    0.52
  -2   2   2   30.78    0.58
  -3   2   3  132.54    1.87
  -3   2   3  132.06    1.70
  -3   2   3  135.60    1.76
  -4   2   4   67.11    1.04
  -5   2   5    9.58    0.35
  -5   2   5    9.99    0.39
  -6   2   6    5.51    0.30
  -6   2   6    5.03    0.32
  -7   2   7   10.88    0.49
  -7   2   7   11.54    0.47
  -8   2   8    5.64    0.38
  -8   2   8    6.16    0.43
  -9   2   9    1.88    0.28
  -9   2   9    1.73    0.29
 -10   2  10    5.02    0.43
 -10   2  10    4.45    0.40
 -11   2  11   22.85    0.93
 -11   2  11   23.46    0.87
 -12   2  12    0.29    0.24
 -12   2  12   -0.14    0.20
 -12  -1  11    0.26    0.27
 -11  -1  10    5.28    0.52
 -10  -1   9    8.58    0.55
  -9  -1   8    7.88    0.51
  -8  -1   7    8.31    0.49
  -7  -1   6   10.56    0.51
  -6  -1   5   18.80    0.62
  -5  -1   4    2.44    0.24
  -4  -1   3   27.26    0.64
  -3  -1   2    0.58    0.12
  -2  -1   1   47.04    0.77
  -1  -1   0  973.60   13.08
   1   1   0 1000.00   12.98
   0  -1  -1   93.43    1.19
   0   1   1   91.93    1.09
   0   1   1   94.40    1.23
   0   1   1   94.41    1.19
  -1   1   2  305.50    4.07
  -1   1   2  302.78    4.11
  -2   1   3   43.25    0.72
  -2   1   3   42.40    0.66
  -3   1   4  217.69    2.82
  -4   1   5    7.54    0.32
  -4   1   5    7.11    0.29
  -5   1   6   14.02    0.45
  -5   1   6   14.36    0.48
  -6   1   7    2.13    0.24
  -6   1   7    2.02    0.25
  -7   1   8   16.72    0.63
  -7   1   8   18.31    0.61
  -8   1   9    0.49    0.19
  -8   1   9    0.71    0.20
  -9   1  10    0.23    0.19
  -9   1  10   -0.01    0.17
 -10   1  11    4.46    0.47
 -10   1  11    3.80    0.41
 -11   1  12    1.11    0.31
 -11   1  12    0.72    0.27
 -12   1  13    0.15    0.24
 -12   1  13   -0.05    0.23
 -13   0  11    0.05    0.26
 -12   0  10    0.16    0.24
 -11   0   9    0.10    0.22
 -10   0   8    9.66    0.57
  -9   0   7    0.57    0.22
  -8   0   6   15.50    0.62
  -7   0   5    7.38    0.42
  -7   0   5    7.90    0.41
  -6   0   4   16.78    0.55
  -5   0   3   25.22    0.63
  -5   0   3   26.22    0.64
  -4   0   2   11.77    0.37
  -3   0   1    5.82    0.24
  -2   0   0    7.87    0.15
  -2   0   0    7.46    0.24
  -1   0  -1  245.15    3.00
  -1   0  -1  237.13    2.77
   1   0   1  244.33    3.11
   0   0   2   46.62    0.69
   0   0   2   47.60    0.65
  -1   0   3   98.48    1.31
  -1   0   3   97.07    1.31
  -2   0   4  143.56    1.91
  -2   0   4  141.25    1.91
  -3   0   5   58.53    0.99
  -3   0   5   59.80    0.99
  -4   0   6   27.46    0.65
  -4   0   6   27.79    0.64
  -5   0   7    0.96    0.18
  -5   0   7    1.06    0.18
  -6   0   8    9.64    0.45
  -6   0   8    9.86    0.44
  -7   0   9    0.17    0.16
  -7   0   9    0.18    0.17
  -8   0  10    0.44    0.20
  -8   0  10    0.36    0.19
  -9   0  11    1.16    0.28
  -9   0  11    1.69    0.33
 -10   0  12    5.17    0.50
 -10   0  12    5.01    0.51
 -11   0  13    0.24    0.24
 -12   0  14    0.14    0.25
 -13   1  10    0.96    0.31
 -12   1   9    3.83    0.46
 -11   1   8    0.73    0.27
 -10   1   7    7.58    0.50
  -9   1   6    0.07    0.16
  -9   1   6    0.06    0.16
  -8   1   5   32.16    0.89
  -8   1   5   30.98    0.85
  -7   1   4    5.74    0.35
  -7   1   4    5.98    0.35
  -6   1   3   13.18    0.47
  -6   1   3   12.72    0.46
  -5   1   2   17.13    0.48
  -5   1   2   16.90    0.48
  -4   1   1    1.44    0.12
  -4   1   1    1.75    0.17
  -4   1   1    1.65    0.15
  -3   1   0    0.06    0.06
  -3   1   0    0.06    0.07
  -3   1   0    0.06    0.09
  -2   1  -1  111.40    1.31
  -2   1  -1  109.30    1.40
  -2   1  -1  109.44    1.48
  -1   1  -2   69.51    0.85
   1  -1   2   66.97    0.83
   1  -1   2   67.86    0.97
   0  -1   3   23.79    0.38
   0  -1   3   28.23    0.51
  -1  -1   4   23.67    0.48
  -1  -1   4   23.28    0.43
  -2  -1   5   11.49    0.35
  -2  -1   5   12.69    0.34
  -3  -1   6    3.54    0.23
  -3  -1   6    2.89    0.20
  -4  -1   7   51.61    1.02
  -4  -1   7   52.47    1.01
  -5  -1   8    1.65    0.23
  -5  -1   8    1.70    0.23
  -6  -1   9    0.31    0.15
  -6  -1   9    0.02    0.14
  -7  -1  10    1.53    0.27
  -7  -1  10    1.53    0.26
  -8  -1  11    2.02    0.33
  -8  -1  11    1.83    0.31
  -9  -1  12    5.65    0.48
  -9  -1  12    6.46    0.51
 -10  -1  13    0.93    0.30
 -11  -1  14    0.32    0.26
 -13   2   9    0.18    0.24
 -12   2   8    0.61    0.26
 -11   2   7    3.23    0.40
 -10   2   6    2.51    0.33
 -10   2   6    2.57    0.34
  -9   2   5   12.97    0.57
  -9   2   5   13.79    0.59
  -8   2   4   41.88    1.00
  -8   2   4   39.04    0.97
  -7   2   3    3.30    0.30
  -7   2   3    3.22    0.27
  -6   2   2    0.05    0.12
  -6   2   2   -0.09    0.10
  -6   2   2    0.15    0.09
  -5   2   1   21.16    0.54
  -5   2   1   20.23    0.45
  -5   2   1   20.96    0.51
  -4   2   0   23.21    0.52
  -4   2   0   23.11    0.49
  -4   2   0   23.08    0.46
  -3   2  -1   17.40    0.35
  -3   2  -1   17.57    0.41
  -3   2  -1   17.20    0.36
  -2   2  -2    0.38    0.05
  -2   2  -2    0.25    0.08
   2  -2   2    0.13    0.13
  -1   2  -3   24.93    0.44
   1  -2   3   23.77    0.55
   0  -2   4  126.31    1.57
   0  -2   4  122.80    1.72
  -1  -2   5    3.28    0.24
  -1  -2   5    3.26    0.17
  -2  -2   6    2.66    0.23
  -2  -2   6    2.39    0.18
  -3  -2   7    6.05    0.28
  -3  -2   7    5.57    0.32
  -4  -2   8    0.35    0.13
  -4  -2   8    0.45    0.16
  -5  -2   9   -0.07    0.14
  -5  -2   9    0.17    0.14
  -6  -2  10   12.71    0.56
  -6  -2  10   12.19    0.55
  -7  -2  11    0.09    0.18
  -7  -2  11    0.09    0.18
  -8  -2  12    9.65    0.58
  -8  -2  12    9.58    0.56
  -9  -2  13    0.06    0.21
 -10  -2  14    1.62    0.36
 -11  -2  15    0.94    0.34
 -13   3   8    1.18    0.31
 -12   3   7    0.60    0.26
 -11   3   6    0.00    0.19
 -11   3   6    0.03    0.19
 -10   3   5    0.15    0.16
 -10   3   5    0.12    0.19
  -9   3   4    2.75    0.31
  -9   3   4    2.37    0.30
  -8   3   3    0.43    0.16
  -8   3   3    0.50    0.19
  -7   3   2    0.46    0.13
  -7   3   2    0.44    0.16
  -7   3   2    0.38    0.14
  -6   3   1    4.21    0.28
  -6   3   1    4.22    0.25
  -6   3   1    4.63    0.27
  -5   3   0    0.09    0.11
  -5   3   0    0.04    0.08
  -5   3   0   -0.01    0.08
  -4   3  -1   22.24    0.45
  -4   3  -1   22.30    0.47
  -4   3  -1   22.24    0.50
   4  -3   1   21.66    0.50
  -3   3  -2    1.63    0.11
  -3   3  -2    1.58    0.14
   3  -3   2    1.33    0.17
  -2   3  -3   50.71    0.66
   2  -3   3   50.77    0.89
  -1   3  -4    0.13    0.08
  -1   3  -4    0.01    0.05
   1  -3   4    0.22    0.17
   0  -3   5   29.19    0.62
  -1  -3   6   61.79    1.07
  -2  -3   7    0.42    0.14
  -2  -3   7    0.15    0.10
  -3  -3   8    3.72    0.28
  -3  -3   8    3.70    0.26
  -4  -3   9    4.19    0.35
  -4  -3   9    4.29    0.31
  -5  -3  10    0.12    0.14
  -5  -3  10    0.10    0.16
  -6  -3  11    0.28    0.19
  -7  -3  12    1.67    0.31
  -8  -3  13    0.18    0.22
  -9  -3  14    0.49    0.27
 -10  -3  15    0.92    0.32
 -13   4   7    0.49    0.26
 -12   4   6    0.32    0.22
 -12   4   6    0.13    0.21
 -11   4   5    3.31    0.39
 -11   4   5    3.15    0.37
 -10   4   4    4.02    0.39
 -10   4   4    4.39    0.39
  -9   4   3   12.46    0.53
  -9   4   3   12.81    0.54
  -8   4   2    4.16    0.32
  -8   4   2    3.55    0.30
  -8   4   2    3.87    0.32
  -7   4   1    7.42    0.37
  -7   4   1    7.05    0.33
  -7   4   1    6.57    0.34
  -6   4   0   16.87    0.50
  -6   4   0   17.81    0.49
  -6   4   0   17.71    0.49
  -5   4  -1    2.10    0.19
  -5   4  -1    2.36    0.18
   5  -4   1    2.28    0.21
  -4   4  -2   21.99    0.50
  -4   4  -2   21.95    0.43
   4  -4   2   21.81    0.52
  -3   4  -3   15.31    0.30
  -3   4  -3   15.64    0.41
   3  -4   3   15.04    0.46
  -2   4  -4    0.75    0.08
  -2   4  -4    0.70    0.12
   2  -4   4    0.77    0.19
  -1   4  -5    3.37    0.20
  -1   4  -5    3.17    0.15
   1  -4   5    3.38    0.25
   0   4  -6    0.18    0.11
   0  -4   6    0.18    0.14
  -1  -4   7    1.07    0.18
  -2  -4   8   13.07    0.48
  -3  -4   9   13.64    0.53
  -4  -4  10    1.38    0.26
  -5  -4  11   -0.22    0.17
  -6  -4  12    1.35    0.29
  -7  -4  13    3.57    0.42
  -8  -4  14   -0.12    0.20
  -9  -4  15    1.55    0.37
 -10  -4  16    1.25    0.38
 -13   5   6    7.10    0.54
 -12   5   5    2.02    0.35
 -12   5   5    2.36    0.35
 -11   5   4    0.61    0.22
 -11   5   4    0.75    0.23
 -10   5   3    4.52    0.37
 -10   5   3    4.69    0.37
  -9   5   2   12.39    0.53
  -9   5   2   12.14    0.50
  -9   5   2   11.96    0.51
  -8   5   1    0.81    0.18
  -8   5   1    1.15    0.22
  -8   5   1    1.12    0.19
  -7   5   0   -0.08    0.11
  -7   5   0   -0.03    0.10
  -7   5   0    0.12    0.14
   7  -5   0   -0.11    0.17
  -6   5  -1    8.00    0.34
  -6   5  -1    8.66    0.33
   6  -5   1    8.40    0.37
  -5   5  -2    6.99    0.31
  -5   5  -2    6.68    0.26
   5  -5   2    6.61    0.34
  -4   5  -3    5.11    0.28
  -4   5  -3    5.21    0.20
   4  -5   3    4.74    0.33
  -3   5  -4  109.11    1.43
  -3   5  -4  111.56    1.57
   3  -5   4  110.19    1.70
  -2   5  -5   33.60    0.68
  -2   5  -5   32.97    0.54
   2  -5   5   33.71    0.74
  -1   5  -6    1.60    0.17
  -1   5  -6    1.92    0.15
   1  -5   6    1.87    0.22
   0   5  -7   18.44    0.51
   0  -5   7   17.63    0.55
   1   5  -8   15.08    0.48
  -1  -5   8   14.12    0.51
  -2  -5   9   20.08    0.64
  -3  -5  10   10.59    0.50
  -4  -5  11    6.36    0.46
  -5  -5  12   10.70    0.57
  -6  -5  13    2.96    0.39
  -7  -5  14    1.88    0.35
  -8  -5  15    0.30    0.25
  -9  -5  16    2.60    0.45
 -13   6   5    2.16    0.37
 -12   6   4    2.45    0.35
 -11   6   3    0.37    0.19
 -11   6   3    0.15    0.21
 -10   6   2    1.81    0.27
 -10   6   2    1.56    0.25
 -10   6   2    1.37    0.26
  -9   6   1    4.77    0.36
  -9   6   1    4.17    0.33
  -9   6   1    5.94    0.38
   9  -6  -1    5.16    0.38
  -8   6   0    1.78    0.22
  -8   6   0    1.23    0.20
   8  -6   0    1.25    0.26
  -7   6  -1   24.94    0.62
  -7   6  -1   25.30    0.67
   7  -6   1   24.20    0.66
  -6   6  -2   12.27    0.45
  -6   6  -2   11.47    0.37
   6  -6   2   11.12    0.47
  -5   6  -3   12.49    0.44
  -5   6  -3   13.80    0.37
   5  -6   3   13.83    0.53
  -4   6  -4    5.16    0.29
  -4   6  -4    4.61    0.20
   4  -6   4    4.69    0.39
  -3   6  -5   59.57    1.04
  -3   6  -5   59.37    0.87
   3  -6   5   58.31    1.11
  -2   6  -6   62.73    1.08
  -2   6  -6   61.98    0.93
   2  -6   6   61.72    1.13
  -1   6  -7    1.02    0.15
  -1   6  -7    1.23    0.17
   1  -6   7    1.12    0.21
   0   6  -8   11.74    0.44
   0   6  -8   13.17    0.40
   0  -6   8   13.19    0.50
   1   6  -9    8.23    0.40
  -1  -6   9    7.74    0.42
   2   6 -10   44.95    0.96
  -2  -6  10   43.18    1.05
  -3  -6  11    3.46    0.38
  -4  -6  12   38.97    1.09
  -5  -6  13    6.60    0.50
  -6  -6  14    0.00    0.22
  -7  -6  15    4.09    0.49
  -8  -6  16    8.77    0.67
 -14   7   5    0.16    0.25
 -13   7   4    7.39    0.54
 -12   7   3    3.57    0.39
 -11   7   2    2.61    0.33
 -11   7   2    3.06    0.35
 -10   7   1   10.10    0.49
 -10   7   1    9.76    0.50
  10  -7  -1   10.62    0.52
  -9   7   0    1.81    0.25
  -9   7   0    1.84    0.24
   9  -7   0    2.34    0.29
  -8   7  -1   28.35    0.77
  -8   7  -1   29.52    0.73
   8  -7   1   28.01    0.76
  -7   7  -2    0.08    0.11
  -7   7  -2    0.09    0.12
   7  -7   2    0.14    0.23
  -6   7  -3   16.11    0.44
  -6   7  -3   15.32    0.54
   6  -7   3   16.32    0.59
  -5   7  -4   11.48    0.34
  -5   7  -4   10.52    0.43
   5  -7   4   10.79    0.53
  -4   7  -5   62.53    1.14
  -4   7  -5   60.78    0.94
   4  -7   5   62.32    1.20
  -3   7  -6   44.10    0.91
  -3   7  -6   43.85    0.74
   3  -7   6   45.16    0.95
  -2   7  -7   16.41    0.53
  -2   7  -7   16.14    0.43
   2  -7   7   16.41    0.57
  -1   7  -8   12.18    0.47
  -1   7  -8   12.55    0.40
   1  -7   8   12.42    0.52
   0   7  -9    1.32    0.22
   0   7  -9    1.64    0.20
   0  -7   9    1.70    0.27
   1   7 -10    2.68    0.28
  -1  -7  10    2.31    0.30
   2   7 -11   10.08    0.48
  -2  -7  11    9.72    0.51
   3   7 -12    5.57    0.39
  -3  -7  12    5.16    0.42
   4   7 -13    9.63    0.50
  -4  -7  13   10.27    0.60
  -5  -7  14    7.24    0.53
  -6  -7  15    0.04    0.25
  -7  -7  16    6.39    0.63
  -8  -7  17    3.41    0.50
 -13   8   3    3.20    0.41
 -12   8   2    0.03    0.18
 -12   8   2   -0.03    0.16
 -11   8   1    4.03    0.40
 -11   8   1    3.78    0.38
 -10   8   0   14.20    0.60
 -10   8   0   14.98    0.59
  -9   8  -1    0.63    0.18
  -9   8  -1    0.37    0.18
   9  -8   1    1.03    0.26
  -8   8  -2    6.58    0.41
  -8   8  -2    6.16    0.34
   8  -8   2    6.56    0.45
  -7   8  -3   13.60    0.44
  -7   8  -3   12.98    0.52
   7  -8   3   12.82    0.61
  -6   8  -4   53.62    1.13
  -6   8  -4   54.88    0.96
   6  -8   4   54.45    1.18
  -5   8  -5    1.28    0.15
  -5   8  -5    1.26    0.21
   5  -8   5    1.67    0.34
  -4   8  -6   21.64    0.66
  -4   8  -6   22.34    0.48
   4  -8   6   23.89    0.73
  -3   8  -7   41.26    0.93
  -3   8  -7   41.19    0.75
   3  -8   7   41.19    0.94
  -2   8  -8    2.69    0.28
  -2   8  -8    2.45    0.24
   2  -8   8    2.71    0.32
  -1   8  -9    5.91    0.35
  -1   8  -9    6.10    0.39
   1  -8   9    6.51    0.42
   0   8 -10   -0.31    0.14
   0   8 -10    0.14    0.16
   0  -8  10    0.23    0.19
   1   8 -11    4.11    0.32
   1   8 -11    3.93    0.35
  -1  -8  11    3.70    0.37
   2   8 -12    1.08    0.23
   2   8 -12    0.71    0.20
  -2  -8  12    0.46    0.22
   3   8 -13   15.56    0.63
  -3  -8  13   15.02    0.71
   4   8 -14   12.82    0.60
  -4  -8  14   11.99    0.67
   5   8 -15    1.14    0.27
  -5  -8  15    0.87    0.31
   6   8 -16    3.60    0.40
  -6  -8  16    3.91    0.52
   7   8 -17    0.32    0.23
  -7  -8  17    0.21    0.28
 -13   9   2    4.31    0.46
 -12   9   1    0.10    0.19
 -11   9   0   10.75    0.56
 -10   9  -1    1.24    0.25
  -9   9  -2   10.64    0.54
  -8   9  -3   11.34    0.54
   8  -9   3   12.40    0.60
  -7   9  -4    1.37    0.23
   7  -9   4    1.66    0.34
  -6   9  -5    4.26    0.37
   6  -9   5    4.42    0.43
  -5   9  -6   12.30    0.54
   5  -9   6   11.63    0.59
  -4   9  -7    6.37    0.39
   4  -9   7    7.40    0.46
  -3   9  -8   20.36    0.66
   3  -9   8   20.82    0.68
  -2   9  -9    1.34    0.23
   2  -9   9    1.33    0.28
  -1   9 -10   -0.14    0.13
   1  -9  10    0.11    0.18
   0   9 -11   43.83    0.92
   0   9 -11   43.31    1.04
   0  -9  11   41.95    1.09
   1   9 -12    0.81    0.23
   1   9 -12    0.91    0.21
  -1  -9  12    0.89    0.25
   2   9 -13   15.32    0.63
   2   9 -13   16.34    0.61
  -2  -9  13   15.15    0.72
   3   9 -14    5.59    0.43
   3   9 -14    5.38    0.41
  -3  -9  14    6.02    0.49
   4   9 -15    0.00    0.19
  -4  -9  15    0.09    0.25
   5   9 -16    1.00    0.28
  -5  -9  16    1.49    0.38
   6   9 -17    0.12    0.23
  -6  -9  17   -0.05    0.25
 -13  10   1    0.99    0.28
 -12  10   0    6.33    0.50
 -11  10  -1   10.99    0.59
 -10  10  -2    0.00    0.17
  -9  10  -3    1.14    0.25
  -8  10  -4    9.44    0.52
  -7  10  -5    3.99    0.38
  -6  10  -6    0.45    0.19
   6 -10   6   -0.29    0.27
  -5  10  -7    3.45    0.35
   5 -10   7    2.45    0.32
  -4  10  -8   19.89    0.70
   4 -10   8   20.39    0.70
  -3  10  -9    1.26    0.25
   3 -10   9    1.13    0.28
  -2  10 -10    5.74    0.40
   2 -10  10    5.00    0.41
  -1  10 -11    3.28    0.35
   1 -10  11    2.77    0.35
   0  10 -12    0.05    0.17
   0 -10  12   -0.22    0.17
   1  10 -13    3.54    0.37
  -1 -10  13    2.99    0.40
   2  10 -14    3.78    0.39
  -2 -10  14    3.61    0.44
   3  10 -15   12.02    0.62
  -3 -10  15   11.67    0.68
   4  10 -16    0.44    0.24
  -4 -10  16   -0.05    0.22
   5  10 -17   -0.02    0.21
  -5 -10  17   -0.08    0.27
 -13  11   0    0.15    0.23
 -12  11  -1    1.33    0.29
 -11  11  -2    0.25    0.21
 -10  11  -3    6.57    0.47
  -9  11  -4    6.46    0.48
  -8  11  -5    8.23    0.51
  -7  11  -6    1.96    0.29
  -6  11  -7    3.09    0.35
  -5  11  -8    7.10    0.48
   5 -11   8    7.70    0.48
  -4  11  -9    1.18    0.26
   4 -11   9    0.88    0.28
  -3  11 -10    1.89    0.29
   3 -11  10    2.66    0.34
  -2  11 -11    3.61    0.38
   2 -11  11    3.80    0.40
  -1  11 -12    2.52    0.34
   1 -11  12    3.51    0.40
   0  11 -13    0.23    0.20
   0 -11  13    0.22    0.22
   1  11 -14    0.42    0.23
  -1 -11  14    0.65    0.28
   2  11 -15    6.63    0.50
  -2 -11  15    6.32    0.55
   3  11 -16   -0.10    0.22
  -3 -11  16   -0.15    0.25
   4  11 -17    0.06    0.24
  -4 -11  17    0.59    0.33
 -12  12  -2    0.39    0.24
 -11  12  -3    0.33    0.21
 -10  12  -4    4.41    0.46
  -9  12  -5    0.55    0.24
  -8  12  -6    1.12    0.26
  -7  12  -7    0.10    0.19
  -6  12  -8   12.52    0.63
  -5  12  -9    2.17    0.33
  -4  12 -10    1.37    0.28
   4 -12  10    2.41    0.35
  -3  12 -11    4.23    0.41
   3 -12  11    4.31    0.43
  -2  12 -12    1.88    0.32
   2 -12  12    1.59    0.32
  -1  12 -13    2.10    0.33
   1 -12  13    1.41    0.32
   0  12 -14    2.93    0.38
   0 -12  14    2.93    0.43
   1  12 -15    4.68    0.48
  -1 -12  15    4.32    0.51
   2  12 -16    0.28    0.26
  -2 -12  16   -0.15    0.26
   3  12 -17   -0.23    0.22
  -3 -12  17   -0.10    0.27
 -12  13  -3    0.10    0.24
 -11  13  -4    0.94    0.30
 -10  13  -5    4.10    0.46
  -9  13  -6    4.69    0.49
  -8  13  -7   -0.06    0.19
  -7  13  -8    0.34    0.23
  -6  13  -9    0.40    0.22
  -5  13 -10    1.38    0.31
  -4  13 -11    0.14    0.22
  -3  13 -12   -0.20    0.18
   3 -13  12    0.02    0.25
  -2  13 -13    0.03    0.22
   2 -13  13    0.66    0.29
  -1  13 -14    0.12    0.22
   1 -13  14    0.07    0.26
   0  13 -15    5.81    0.54
   0 -13  15    6.50    0.62
   1  13 -16    3.63    0.46
  -1 -13  16    4.10    0.53
 -11  14  -5    0.17    0.23
 -10  14  -6    2.36    0.40
  -9  14  -7   -0.08    0.20
  -8  14  -8    1.29    0.31
  -7  14  -9    0.27    0.24
  -6  14 -10    1.43    0.32
  -5  14 -11    0.33    0.25
  -4  14 -12    0.17    0.22
  -3  14 -13    1.41    0.33
  -2  14 -14   -0.17    0.22
  -1  14 -15    3.34    0.45
   1 -14  15    3.77    0.50
  -9  15  -8    0.02    0.24
  -8  15  -9    2.10    0.38
  -7  15 -10    0.66    0.29
  -6  15 -11   -0.11    0.23
  -5  15 -12    0.51    0.27
  -4  15 -13    0.24    0.27
  -3  15 -14    1.07    0.33
  -3  16 -10   -0.09    0.23
  -4  16  -9   -0.22    0.21
  -5  16  -8    0.23    0.25
  -6  16  -7   -0.18    0.23
  -7  16  -6    0.01    0.24
  -8  16  -5   -0.27    0.22
   0  15 -12    2.37    0.38
  -1  15 -11    0.15    0.23
  -2  15 -10    0.47    0.26
  -3  15  -9    1.00    0.29
  -4  15  -8   -0.07    0.21
  -5  15  -7   -0.10    0.21
  -6  15  -6    1.28    0.31
  -7  15  -5    0.02    0.22
  -8  15  -4    1.04    0.31
  -9  15  -3    0.36    0.25
 -10  15  -2    0.54    0.28
   1  14 -12   -0.18    0.21
   0  14 -11    1.53    0.31
  -1  14 -10   -0.22    0.20
  -2  14  -9    0.17    0.23
  -3  14  -8    2.17    0.35
  -4  14  -7    0.21    0.21
  -5  14  -6    2.95    0.38
  -6  14  -5    0.04    0.21
  -7  14  -4    4.45    0.46
  -8  14  -3    0.93    0.29
  -9  14  -2    0.82    0.27
 -10  14  -1   -0.28    0.19
 -11  14   0    0.25    0.25
  -3 -13  13    7.73    0.61
  -2 -13  12    0.50    0.27
  -1 -13  11    0.66    0.27
   1  13 -11    1.17    0.27
   0  13 -10   -0.28    0.19
  -1  13  -9    0.34    0.22
  -2  13  -8    1.72    0.30
  -3  13  -7    1.63    0.30
  -4  13  -6    1.77    0.30
  -5  13  -5    0.09    0.19
  -6  13  -4    2.87    0.36
  -7  13  -3    1.96    0.32
  -8  13  -2    0.87    0.26
  -9  13  -1    0.23    0.22
 -10  13   0    0.42    0.22
 -11  13   1    1.13    0.32
  -4 -12  13    2.00    0.39
   4  12 -13    1.98    0.42
  -3 -12  12    1.56    0.34
   3  12 -12    2.31    0.41
  -2 -12  11    1.49    0.32
   2  12 -11    1.51    0.36
   2  12 -11    1.19    0.27
  -1 -12  10    4.01    0.43
   1  12 -10    4.30    0.47
   1  12 -10    4.29    0.40
   0 -12   9    0.86    0.24
   0  12  -9    0.91    0.31
   0  12  -9    0.69    0.22
  -1  12  -8   10.49    0.53
  -1  12  -8   10.96    0.64
  -2  12  -7    4.88    0.48
  -2  12  -7    5.54    0.42
  -3  12  -6    0.18    0.19
  -3  12  -6    0.12    0.27
  -4  12  -5    5.13    0.44
  -4  12  -5    7.08    0.47
  -5  12  -4   19.30    0.73
  -5  12  -4   18.64    0.71
  -6  12  -3   31.52    0.91
  -6  12  -3   32.11    0.96
  -7  12  -2    0.10    0.20
  -7  12  -2    0.27    0.20
  -8  12  -1    1.87    0.30
  -8  12  -1    2.21    0.32
  -9  12   0    5.38    0.48
  -9  12   0    4.63    0.44
 -10  12   1    0.32    0.23
 -11  12   2    0.17    0.22
 -12  12   3    2.43    0.39
  -6 -11  14    4.69    0.56
   6  11 -14    4.27    0.54
  -5 -11  13    0.12    0.26
   5  11 -13    0.19    0.27
  -4 -11  12    1.17    0.32
   4  11 -12    1.71    0.37
  -3 -11  11   -0.25    0.19
   3  11 -11    0.08    0.19
   3  11 -11    0.48    0.27
  -2 -11  10    8.48    0.53
   2  11 -10    8.81    0.48
   2  11 -10    8.30    0.56
  -1 -11   9    6.33    0.44
   1  11  -9    5.33    0.48
   1  11  -9    6.10    0.43
   0 -11   8    0.40    0.19
   0  11  -8    0.38    0.19
   0  11  -8    0.47    0.27
   1 -11   7   36.40    0.90
  -1  11  -7   37.69    1.02
  -1  11  -7   38.04    0.95
   2 -11   6   36.02    0.83
  -2  11  -6   35.12    0.97
  -2  11  -6   36.20    0.94
  -3  11  -5    2.44    0.36
  -3  11  -5    1.77    0.27
  -4  11  -4    0.36    0.24
  -4  11  -4    0.35    0.18
  -5  11  -3   11.75    0.55
  -5  11  -3   11.28    0.55
  -6  11  -2   11.59    0.54
  -6  11  -2   10.12    0.53
  -7  11  -1    2.00    0.30
  -7  11  -1    1.89    0.29
  -8  11   0    2.35    0.32
  -8  11   0    1.73    0.30
  -9  11   1    3.85    0.41
  -9  11   1    4.70    0.44
 -10  11   2    1.22    0.29
 -10  11   2    1.68    0.32
 -11  11   3    3.42    0.42
 -11  11   3    3.61    0.43
 -12  11   4   12.20    0.69
 -12  11   4   12.62    0.70
  -7 -10  14    3.08    0.49
   7  10 -14    3.29    0.48
  -6 -10  13    4.73    0.55
   6  10 -13    5.70    0.58
  -5 -10  12    1.77    0.37
   5  10 -12    3.10    0.43
  -4 -10  11    0.40    0.25
   4  10 -11    0.45    0.20
   4  10 -11    0.52    0.26
  -3 -10  10    2.84    0.38
   3  10 -10    2.59    0.30
   3  10 -10    3.08    0.40
  -2 -10   9   32.42    0.96
   2  10  -9   31.76    0.95
   2  10  -9   33.56    0.86
  -1 -10   8    1.82    0.28
   1  10  -8    1.83    0.25
   1  10  -8    1.69    0.31
   0 -10   7   46.04    1.04
   0  10  -7   46.32    1.02
   0  10  -7   46.72    1.12
   1 -10   6   44.23    0.96
  -1  10  -6   45.77    1.01
  -1  10  -6   44.28    1.08
   2 -10   5    0.54    0.16
  -2  10  -5    0.86    0.28
  -2  10  -5    0.38    0.17
  -3  10  -4    1.67    0.24
  -3  10  -4    1.77    0.31
  -4  10  -3   -0.22    0.13
  -4  10  -3   -0.09    0.20
  -5  10  -2    7.36    0.43
  -5  10  -2    7.62    0.42
  -6  10  -1    6.01    0.39
  -6  10  -1    5.51    0.41
  -7  10   0   12.20    0.56
  -7  10   0   10.94    0.52
  -8  10   1    2.40    0.30
  -8  10   1    2.56    0.33
  -9  10   2    1.03    0.26
  -9  10   2    0.74    0.22
 -10  10   3    0.00    0.18
 -10  10   3   -0.05    0.18
 -11  10   4   11.82    0.64
 -11  10   4   11.96    0.64
 -12  10   5    8.02    0.57
 -13  10   6    0.26    0.26
  -7  -9  13    2.77    0.44
   7   9 -13    2.78    0.43
  -6  -9  12   10.01    0.67
   6   9 -12    9.78    0.63
  -5  -9  11    1.25    0.31
   5   9 -11    0.95    0.29
  -4  -9  10    2.53    0.36
   4   9 -10    2.62    0.37
   4   9 -10    2.36    0.28
  -3  -9   9   17.25    0.70
   3   9  -9   17.87    0.72
   3   9  -9   18.25    0.61
  -2  -9   8   27.33    0.83
   2   9  -8   27.32    0.73
   2   9  -8   28.28    0.85
  -1  -9   7    1.49    0.24
   1   9  -7    1.58    0.29
   1   9  -7    2.11    0.24
   0  -9   6    4.28    0.31
   0   9  -6    3.67    0.38
   0   9  -6    3.93    0.31
   1  -9   5   13.79    0.47
  -1   9  -5   13.18    0.58
  -1   9  -5   13.75    0.50
   2  -9   4   27.20    0.62
  -2   9  -4   27.44    0.79
  -2   9  -4   27.30    0.72
   3  -9   3    4.94    0.25
  -3   9  -3    5.66    0.43
  -3   9  -3    4.68    0.32
  -4   9  -2   17.37    0.58
  -4   9  -2   17.22    0.61
  -5   9  -1    5.16    0.35
  -5   9  -1    5.25    0.40
  -6   9   0    9.06    0.45
  -6   9   0    9.84    0.48
  -7   9   1   16.59    0.63
  -7   9   1   17.08    0.63
  -8   9   2    1.22    0.24
  -8   9   2    1.64    0.27
  -9   9   3    0.21    0.18
  -9   9   3    0.00    0.18
 -10   9   4   10.58    0.57
 -10   9   4   10.51    0.57
 -11   9   5    6.54    0.49
 -12   9   6   10.53    0.64
 -13   9   7   -0.08    0.21
  -8  -8  13    1.43    0.36
  -7  -8  12    7.93    0.61
  -6  -8  11    9.56    0.62
   6   8 -11    8.10    0.57
  -5  -8  10    2.51    0.36
   5   8 -10    2.51    0.28
   5   8 -10    2.63    0.37
  -4  -8   9    2.41    0.34
   4   8  -9    1.92    0.30
   4   8  -9    2.23    0.26
  -3  -8   8    1.34    0.26
   3   8  -8    1.44    0.28
   3   8  -8    1.07    0.20
  -2  -8   7    4.75    0.36
   2   8  -7    5.38    0.32
   2   8  -7    5.36    0.43
  -1  -8   6    2.13    0.25
   1   8  -6    2.18    0.30
   1   8  -6    1.49    0.21
   0  -8   5   31.40    0.74
   0   8  -5   30.70    0.81
   0   8  -5   30.02    0.71
   1  -8   4    5.75    0.30
  -1   8  -4    5.47    0.31
  -1   8  -4    5.93    0.42
   2  -8   3    1.76    0.17
  -2   8  -3    1.80    0.28
  -2   8  -3    1.60    0.20
   3  -8   2    0.04    0.09
  -3   8  -2    0.03    0.21
  -3   8  -2    0.31    0.14
   4  -8   1    5.75    0.19
  -4   8  -1    5.80    0.38
  -4   8  -1    6.03    0.35
  -5   8   0    6.79    0.37
  -5   8   0    6.93    0.40
  -6   8   1   15.60    0.56
  -6   8   1   14.64    0.56
  -7   8   2   14.90    0.59
  -7   8   2   13.88    0.56
  -8   8   3   13.90    0.58
  -8   8   3   13.32    0.59
  -9   8   4    0.39    0.21
  -9   8   4    0.46    0.20
 -10   8   5    5.38    0.44
 -11   8   6    2.48    0.37
 -12   8   7    0.11    0.22
 -13   8   8    0.71    0.30
  -9  -7  13    1.85    0.40
  -8  -7  12    7.19    0.60
  -7  -7  11    9.76    0.62
  -6  -7  10    1.58    0.33
  -5  -7   9    4.82    0.41
   5   7  -9    3.81    0.31
  -4  -7   8   18.99    0.72
   4   7  -8   19.08    0.70
   4   7  -8   19.72    0.57
  -3  -7   7   19.11    0.66
   3   7  -7   19.61    0.66
   3   7  -7   19.94    0.55
  -2  -7   6    0.27    0.16
   2   7  -6    0.02    0.18
   2   7  -6    0.32    0.13
  -1  -7   5    5.51    0.32
   1   7  -5    5.12    0.38
   1   7  -5    4.98    0.29
   0  -7   4   15.15    0.46
   0   7  -4   16.08    0.55
   0   7  -4   15.31    0.46
   1  -7   3    0.01    0.10
  -1   7  -3   -0.09    0.09
  -1   7  -3    0.10    0.18
   2  -7   2    1.16    0.13
  -2   7  -2    0.87    0.22
  -2   7  -2    0.85    0.15
   3  -7   1   14.54    0.30
  -3   7  -1   15.18    0.47
  -3   7  -1   14.70    0.52
  -4   7   0   25.50    0.65
  -4   7   0   26.09    0.69
  -5   7   1    1.11    0.21
  -5   7   1    0.42    0.14
  -6   7   2   12.12    0.49
  -6   7   2   12.95    0.52
  -7   7   3   35.48    0.92
  -7   7   3   32.99    0.85
  -8   7   4    2.14    0.30
  -8   7   4    2.27    0.28
  -9   7   5   14.93    0.63
 -10   7   6    5.08    0.43
 -11   7   7    0.84    0.26
 -12   7   8    0.04    0.20
 -13   7   9    1.23    0.32
 -10  -6  13    0.23    0.26
  -9  -6  12    2.79    0.45
  -8  -6  11    4.14    0.49
  -7  -6  10    1.91    0.35
  -6  -6   9    0.17    0.19
   6   6  -9    0.40    0.16
  -5  -6   8    0.23    0.19
   5   6  -8   -0.02    0.13
  -4  -6   7   11.00    0.52
   4   6  -7    9.97    0.39
  -3  -6   6   10.24    0.47
   3   6  -6   11.03    0.38
   3   6  -6   11.82    0.52
  -2  -6   5   -0.08    0.11
   2   6  -5    0.05    0.11
   2   6  -5    0.08    0.17
  -1  -6   4   76.18    1.27
   1   6  -4   72.96    1.12
   1   6  -4   74.09    1.29
   0  -6   3   84.45    1.30
   0   6  -3   82.48    1.36
   0   6  -3   83.93    1.23
   1  -6   2   40.55    0.70
  -1   6  -2   42.76    0.86
  -1   6  -2   41.58    0.76
   2  -6   1   12.48    0.28
  -2   6  -1   12.00    0.46
  -2   6  -1   12.20    0.38
  -3   6   0    7.65    0.38
  -3   6   0    7.01    0.31
  -4   6   1    2.37    0.22
  -4   6   1    2.35    0.24
   5  -6  -2   10.38    0.26
  -5   6   2   10.01    0.40
  -5   6   2   10.69    0.45
  -6   6   3    4.28    0.32
  -6   6   3    4.64    0.31
  -6   6   3    3.96    0.22
  -7   6   4   31.17    0.81
  -7   6   4   32.56    0.66
  -7   6   4   32.68    0.88
  -8   6   5    0.35    0.18
  -8   6   5    0.64    0.15
  -9   6   6    1.18    0.25
 -10   6   7    5.66    0.43
 -11   6   8    0.29    0.21
 -12   6   9    3.62    0.46
 -13   6  10    0.48    0.27
 -10  -5  12    3.49    0.48
  -9  -5  11    2.20    0.40
  -8  -5  10   10.72    0.65
  -7  -5   9   -0.05    0.18
  -6  -5   8    0.81    0.23
  -5  -5   7    1.93    0.29
  -4  -5   6    4.96    0.35
   4   5  -6    4.83    0.28
  -3  -5   5   -0.14    0.12
   3   5  -5    0.15    0.10
  -2  -5   4    0.86    0.16
   2   5  -4    0.68    0.12
   2   5  -4    0.66    0.18
  -1  -5   3   24.86    0.57
   1   5  -3   26.15    0.51
   1   5  -3   24.60    0.62
   0  -5   2    6.57    0.25
   0   5  -2    6.39    0.24
   0   5  -2    6.56    0.32
   1  -5   1   60.38    0.88
  -1   5  -1   61.15    1.05
  -1   5  -1   60.31    0.93
   2  -5   0   29.58    0.42
  -2   5   0   30.88    0.69
  -2   5   0   29.36    0.58
  -3   5   1   11.02    0.41
  -3   5   1   10.23    0.34
   4  -5  -2   24.24    0.38
  -4   5   2   24.81    0.58
  -4   5   2   23.52    0.61
  -5   5   3    1.93    0.23
  -5   5   3    2.02    0.15
  -5   5   3    2.07    0.21
  -6   5   4    0.60    0.15
  -6   5   4    0.11    0.10
  -6   5   4    0.28    0.15
  -7   5   5    6.29    0.30
  -7   5   5    6.69    0.41
  -8   5   6   15.71    0.63
  -8   5   6   16.84    0.52
  -9   5   7   10.26    0.46
  -9   5   7   10.59    0.55
 -10   5   8    0.13    0.18
 -11   5   9    0.16    0.22
 -12   5  10    0.01    0.21
 -13   5  11    0.06    0.23
 -11  -4  12   -0.05    0.26
 -10  -4  11    0.37    0.28
  -9  -4  10    0.68    0.28
  -8  -4   9    4.36    0.46
  -7  -4   8    3.48    0.40
  -6  -4   7    1.03    0.23
  -5  -4   6    0.10    0.17
  -4  -4   5   15.11    0.54
  -3  -4   4    4.02    0.28
   3   4  -4    3.51    0.20
  -2  -4   3    0.82    0.15
   2   4  -3    1.24    0.12
   2   4  -3    0.83    0.16
  -1  -4   2   12.09    0.35
   1   4  -2   11.90    0.38
   1   4  -2   12.80    0.30
   0  -4   1   22.71    0.44
   0   4  -1   22.95    0.53
   0   4  -1   22.11    0.42
   1  -4   0   10.51    0.22
  -1   4   0   10.56    0.29
  -1   4   0   11.72    0.39
  -2   4   1   23.91    0.57
  -2   4   1   23.26    0.48
  -3   4   2    1.59    0.15
  -3   4   2    1.67    0.19
  -3   4   2    1.60    0.08
  -4   4   3    1.81    0.18
  -4   4   3    2.00    0.21
  -4   4   3    1.82    0.12
  -5   4   4    3.27    0.25
  -5   4   4    3.52    0.27
  -5   4   4    3.12    0.19
  -6   4   5    2.96    0.29
  -6   4   5    3.38    0.23
  -7   4   6    0.12    0.13
  -7   4   6    0.14    0.15
  -8   4   7   10.22    0.52
  -8   4   7    9.47    0.42
  -9   4   8    0.65    0.20
  -9   4   8    0.74    0.22
 -10   4   9    0.18    0.20
 -10   4   9    0.05    0.17
 -11   4  10    0.42    0.23
 -12   4  11    0.41    0.23
 -13   4  12   -0.18    0.21
 -11  -3  11    0.35    0.27
 -10  -3  10    0.12    0.21
  -9  -3   9    0.85    0.26
  -8  -3   8    4.93    0.44
  -7  -3   7    0.66    0.21
  -6  -3   6   13.60    0.57
  -5  -3   5    7.71    0.42
  -4  -3   4   27.74    0.71
  -3  -3   3    5.32    0.29
  -2  -3   2   -0.02    0.09
   2   3  -2   -0.05    0.05
  -1  -3   1    0.02    0.08
   1   3  -1    0.05    0.06
   1   3  -1   -0.19    0.09
   0  -3   0   12.26    0.27
   0   3   0   12.52    0.26
   0   3   0   12.27    0.36
   1  -3  -1   13.61    0.21
  -1   3   1   13.66    0.40
  -1   3   1   14.11    0.31
  -2   3   2    3.01    0.22
  -2   3   2    3.52    0.18
  -3   3   3    2.74    0.13
  -3   3   3    2.89    0.21
  -3   3   3    2.54    0.18
  -4   3   4    2.19    0.22
  -4   3   4    2.20    0.15
  -5   3   5   19.20    0.58
  -5   3   5   17.92    0.46
  -6   3   6   10.79    0.39
  -6   3   6   11.26    0.47
  -7   3   7    1.69    0.25
  -7   3   7    2.22    0.24
  -8   3   8    7.08    0.40
  -8   3   8    7.33    0.46
  -9   3   9    3.49    0.38
  -9   3   9    3.40    0.34
 -10   3  10    0.92    0.26
 -10   3  10    0.95    0.23
 -11   3  11    8.99    0.54
 -11   3  11    9.29    0.61
 -12   3  12    4.69    0.52
 -12  -2  11   -0.04    0.25
 -11  -2  10   -0.13    0.23
 -10  -2   9    0.36    0.25
  -9  -2   8    2.23    0.34
  -8  -2   7    0.50    0.21
  -7  -2   6    3.80    0.37
  -6  -2   5    0.52    0.19
  -5  -2   4   -0.06    0.12
  -4  -2   3    0.13    0.11
  -3  -2   2   17.40    0.47
  -2  -2   1    6.29    0.25
   2   2  -1    6.22    0.15
  -1  -2   0   51.88    0.79
   1   2   0   52.56    0.63
   1   2   0   51.95    0.82
   0  -2  -1   27.38    0.43
   0   2   1   27.42    0.52
   0   2   1   28.31    0.41
  -1   2   2    1.12    0.15
  -1   2   2    0.87    0.09
  -1   2   2    1.18    0.11
  -2   2   3   14.64    0.29
  -2   2   3   14.57    0.39
  -3   2   4    6.43    0.22
  -3   2   4    6.89    0.30
  -4   2   5   22.69    0.50
  -4   2   5   21.72    0.58
  -5   2   6    1.57    0.20
  -5   2   6    2.09    0.19
  -6   2   7    8.25    0.37
  -6   2   7    7.32    0.40
  -7   2   8    1.24    0.23
  -7   2   8    0.98    0.20
  -8   2   9    6.29    0.43
  -8   2   9    6.09    0.39
  -9   2  10    9.16    0.54
  -9   2  10    9.10    0.50
 -10   2  11    1.35    0.27
 -10   2  11    0.49    0.23
 -11   2  12    9.08    0.63
 -11   2  12    9.96    0.59
 -12   2  13    2.52    0.42
 -12   2  13    3.27    0.43
 -12  -1  10    0.17    0.25
 -11  -1   9   -0.18    0.21
 -10  -1   8    0.27    0.23
  -9  -1   7    5.99    0.44
  -8  -1   6    2.28    0.32
  -7  -1   5    3.15    0.32
  -6  -1   4   19.19    0.63
  -5  -1   3    5.62    0.31
  -4  -1   2    8.83    0.35
  -3  -1   1    8.97    0.32
  -2  -1   0    2.99    0.19
  -1  -1  -1   13.74    0.30
   1   1   1   13.73    0.31
   0   1   2   61.92    0.90
   0   1   2   60.95    0.85
  -1   1   3   60.34    0.91
  -1   1   3   59.37    0.86
  -2   1   4   21.75    0.43
  -2   1   4   20.63    0.47
  -3   1   5   44.22    0.85
  -3   1   5   48.40    0.80
  -4   1   6  125.09    1.90
  -4   1   6  126.84    1.84
  -5   1   7    7.99    0.37
  -5   1   7    7.96    0.35
  -6   1   8   15.49    0.57
  -6   1   8   15.83    0.54
  -7   1   9   11.26    0.49
  -7   1   9   12.67    0.56
  -8   1  10    1.27    0.25
  -8   1  10    1.03    0.23
  -9   1  11    3.55    0.40
  -9   1  11    4.20    0.42
 -10   1  12    0.26    0.22
 -10   1  12    0.10    0.21
 -11   1  13    3.59    0.47
 -11   1  13    4.21    0.47
 -12   1  14    2.94    0.44
 -12   1  14    3.83    0.51
 -13   0  10    0.43    0.27
 -12   0   9    0.24    0.26
 -11   0   8    0.46    0.25
 -10   0   7    5.49    0.46
  -9   0   6    0.78    0.23
  -8   0   5    8.46    0.48
  -7   0   4    6.96    0.40
  -6   0   3   -0.02    0.14
  -5   0   2    5.31    0.31
  -4   0   1    3.57    0.23
  -3   0   0   26.68    0.39
  -2   0  -1   52.78    0.84
  -2   0  -1   54.25    0.65
   1   0   2  106.18    1.43
   1   0   2  105.87    1.36
   0   0   3  137.54    1.86
   0   0   3  143.23    1.79
  -1   0   4   57.98    0.90
  -1   0   4   58.76    0.88
  -2   0   5   10.66    0.33
  -2   0   5   11.30    0.33
  -3   0   6   57.31    0.99
  -3   0   6   57.96    1.01
  -4   0   7  104.29    1.65
  -4   0   7  103.73    1.64
  -5   0   8    0.06    0.12
  -5   0   8   -0.06    0.10
  -6   0   9    6.74    0.40
  -6   0   9    7.10    0.40
  -7   0  10    1.24    0.24
  -7   0  10    1.14    0.23
  -8   0  11    4.40    0.39
  -8   0  11    4.23    0.42
  -9   0  12    0.01    0.18
  -9   0  12    0.13    0.20
 -10   0  13    2.20    0.37
 -10   0  13    1.90    0.35
 -11   0  14   10.84    0.71
 -11   0  14   12.14    0.71
 -13   1   9    0.55    0.28
 -12   1   8    2.82    0.40
 -11   1   7    9.64    0.59
 -10   1   6   16.51    0.71
  -9   1   5    0.05    0.17
  -8   1   4   49.52    1.14
  -7   1   3   25.09    0.70
  -7   1   3   25.52    0.72
  -6   1   2    9.54    0.39
  -6   1   2    9.11    0.41
  -5   1   1   53.50    0.81
  -5   1   1   55.22    1.01
  -5   1   1   54.22    0.97
  -4   1   0   81.67    1.30
  -4   1   0   82.79    1.08
  -3   1  -1   79.91    1.21
  -3   1  -1   79.74    1.01
  -2   1  -2   47.54    0.64
   2  -1   2   46.47    0.77
   1  -1   3  158.85    1.92
   1  -1   3  155.10    2.09
   0  -1   4   50.05    0.71
   0  -1   4   50.72    0.86
  -1  -1   5    2.65    0.21
  -1  -1   5    2.22    0.14
  -2  -1   6    1.80    0.15
  -2  -1   6    2.19    0.20
  -3  -1   7   32.52    0.70
  -3  -1   7   31.77    0.71
  -4  -1   8   48.56    1.00
  -4  -1   8   49.39    0.99
  -5  -1   9    1.14    0.20
  -5  -1   9    1.44    0.22
  -6  -1  10    4.56    0.37
  -6  -1  10    5.53    0.37
  -7  -1  11   17.01    0.68
  -7  -1  11   18.40    0.70
  -8  -1  12    0.94    0.26
  -8  -1  12    1.32    0.29
  -9  -1  13    0.65    0.26
  -9  -1  13    0.85    0.28
 -10  -1  14    3.01    0.43
 -10  -1  14    3.38    0.45
 -11  -1  15    5.51    0.59
 -13   2   8    0.23    0.24
 -12   2   7    4.79    0.50
 -11   2   6   16.41    0.72
 -10   2   5    6.32    0.45
  -9   2   4    0.02    0.15
  -9   2   4   -0.14    0.15
  -8   2   3   46.95    1.08
  -8   2   3   46.29    1.05
  -7   2   2   58.08    1.14
  -7   2   2   58.42    1.17
  -6   2   1    1.16    0.17
  -6   2   1    1.51    0.16
  -6   2   1    1.37    0.19
  -5   2   0   42.75    0.85
  -5   2   0   43.29    0.71
  -5   2   0   43.23    0.79
  -4   2  -1  139.89    1.90
  -4   2  -1  146.23    1.78
  -4   2  -1  142.12    2.02
  -3   2  -2   15.24    0.33
   3  -2   2   14.96    0.41
  -2   2  -3    9.66    0.26
   2  -2   3    9.25    0.36
  -1   2  -4    0.93    0.11
   1  -2   4    0.85    0.05
   1  -2   4    0.97    0.22
   0  -2   5   19.34    0.35
  -1  -2   6    7.33    0.24
  -1  -2   6    7.24    0.31
  -2  -2   7   28.52    0.60
  -2  -2   7   28.87    0.68
  -3  -2   8  155.26    2.31
  -3  -2   8  153.24    2.22
  -4  -2   9   25.02    0.68
  -4  -2   9   24.76    0.72
  -5  -2  10   13.59    0.53
  -5  -2  10   14.00    0.56
  -6  -2  11    7.40    0.43
  -6  -2  11    7.94    0.48
  -7  -2  12    5.57    0.45
  -7  -2  12    4.70    0.44
  -8  -2  13    4.45    0.45
  -8  -2  13    4.61    0.47
  -9  -2  14    0.73    0.28
 -10  -2  15   11.07    0.70
 -11  -2  16    3.06    0.49
 -13   3   7    2.29    0.39
 -12   3   6   13.27    0.68
 -11   3   5   10.28    0.57
 -10   3   4    0.21    0.19
 -10   3   4    0.26    0.18
  -9   3   3    2.26    0.29
  -9   3   3    2.49    0.30
  -8   3   2   36.06    0.91
  -8   3   2   37.18    0.79
  -8   3   2   37.07    0.89
  -7   3   1    6.51    0.37
  -7   3   1    5.66    0.30
  -7   3   1    6.04    0.33
  -6   3   0    1.97    0.22
  -6   3   0    1.91    0.18
  -6   3   0    2.52    0.20
  -5   3  -1    9.99    0.32
  -5   3  -1   11.02    0.39
  -5   3  -1   11.09    0.33
  -4   3  -2    6.54    0.25
  -4   3  -2    6.31    0.21
   4  -3   2    5.85    0.30
  -3   3  -3  128.02    1.64
  -3   3  -3  125.79    1.59
   3  -3   3  126.60    1.81
  -2   3  -4  203.75    2.47
   2  -3   4  203.53    2.77
  -1   3  -5  116.30    1.52
   1  -3   5  111.46    1.70
  -1  -3   7   29.87    0.69
  -1  -3   7   29.98    0.57
  -2  -3   8   99.15    1.51
  -2  -3   8   99.90    1.65
  -3  -3   9   43.16    0.98
  -3  -3   9   44.47    0.90
  -4  -3  10   13.12    0.50
  -4  -3  10   13.61    0.56
  -5  -3  11    1.99    0.26
  -5  -3  11    2.70    0.33
  -6  -3  12   -0.01    0.17
  -6  -3  12    0.06    0.17
  -7  -3  13    1.41    0.31
  -8  -3  14    0.66    0.26
  -9  -3  15    3.82    0.48
 -10  -3  16    0.87    0.33
 -14   4   7    0.77    0.29
 -13   4   6    0.41    0.27
 -12   4   5   11.88    0.63
 -11   4   4    1.81    0.31
 -11   4   4    1.41    0.27
 -10   4   3    1.62    0.25
 -10   4   3    1.91    0.29
  -9   4   2    5.84    0.38
  -9   4   2    6.52    0.42
  -9   4   2    7.12    0.37
  -8   4   1   24.61    0.64
  -8   4   1   25.76    0.74
  -8   4   1   24.86    0.69
  -7   4   0    0.59    0.14
  -7   4   0    0.91    0.20
  -7   4   0    0.55    0.14
  -6   4  -1   39.37    0.84
  -6   4  -1   37.53    0.76
  -6   4  -1   39.27    0.76
   6  -4   1   40.54    0.85
  -5   4  -2   39.93    0.75
  -5   4  -2   40.48    0.71
   5  -4   2   40.30    0.82
  -4   4  -3   59.76    0.87
  -4   4  -3   60.27    0.97
   4  -4   3   60.12    1.06
  -3   4  -4   38.53    0.70
  -3   4  -4   37.46    0.52
   3  -4   4   38.32    0.81
  -2   4  -5    2.09    0.18
   2  -4   5    2.35    0.27
  -1   4  -6  162.66    2.00
  -1   4  -6  162.31    2.10
   1  -4   6  156.44    2.29
   0   4  -7   14.74    0.43
   0  -4   7   14.50    0.48
  -1  -4   8   79.41    1.39
  -2  -4   9   52.34    1.09
  -3  -4  10    2.78    0.31
  -4  -4  11    9.28    0.50
  -5  -4  12    0.49    0.22
  -6  -4  13   -0.03    0.18
  -7  -4  14    1.19    0.30
  -8  -4  15    8.37    0.61
  -9  -4  16    7.95    0.64
 -13   5   5    6.65    0.55
 -12   5   4    1.62    0.33
 -12   5   4    1.80    0.32
 -11   5   3    0.23    0.18
 -11   5   3    0.17    0.20
 -10   5   2   -0.10    0.14
 -10   5   2   -0.04    0.17
 -10   5   2    0.03    0.15
  -9   5   1    6.00    0.38
  -9   5   1    6.23    0.41
  -9   5   1    6.14    0.38
  -8   5   0    0.64    0.16
  -8   5   0    0.53    0.21
  -8   5   0    0.77    0.17
   8  -5   0    1.07    0.24
  -7   5  -1    1.24    0.19
  -7   5  -1    1.30    0.17
   7  -5   1    1.30    0.24
  -6   5  -2   18.92    0.52
  -6   5  -2   18.39    0.46
   6  -5   2   17.11    0.55
  -5   5  -3    8.45    0.26
  -5   5  -3    8.45    0.34
   5  -5   3    8.34    0.40
  -4   5  -4    3.60    0.25
   4  -5   4    3.91    0.33
  -3   5  -5   28.31    0.41
  -3   5  -5   28.86    0.63
   3  -5   5   27.40    0.73
  -2   5  -6   37.18    0.74
  -2   5  -6   37.86    0.55
   2  -5   6   36.83    0.84
  -1   5  -7    2.12    0.20
  -1   5  -7    2.25    0.16
   1  -5   7    2.23    0.26
   0   5  -8    1.86    0.21
   0  -5   8    1.72    0.24
  -1  -5   9   -0.02    0.17
  -2  -5  10    4.67    0.39
  -3  -5  11    2.91    0.33
  -4  -5  12    9.51    0.54
  -5  -5  13    0.66    0.25
  -6  -5  14   -0.10    0.18
  -7  -5  15    0.46    0.28
  -8  -5  16   10.94    0.70
  -9  -5  17    2.24    0.43
 -13   6   4   11.39    0.65
 -12   6   3    0.15    0.23
 -12   6   3   -0.22    0.17
 -11   6   2    0.51    0.20
 -11   6   2    0.40    0.20
 -11   6   2    0.47    0.24
  11  -6  -2    0.51    0.23
 -10   6   1    2.21    0.27
 -10   6   1    2.16    0.32
 -10   6   1    1.74    0.26
  10  -6  -1    2.41    0.31
  -9   6   0    0.10    0.13
  -9   6   0    0.28    0.15
   9  -6   0    0.34    0.21
  -8   6  -1    9.04    0.42
  -8   6  -1    9.99    0.41
   8  -6   1    8.98    0.49
  -7   6  -2    2.49    0.25
  -7   6  -2    2.63    0.22
   7  -6   2    2.37    0.29
  -6   6  -3   28.21    0.69
  -6   6  -3   27.98    0.58
   6  -6   3   28.14    0.76
  -5   6  -4    0.06    0.07
  -5   6  -4    0.03    0.12
   5  -6   4   -0.13    0.24
  -4   6  -5    7.07    0.20
  -4   6  -5    7.02    0.34
   4  -6   5    6.93    0.50
  -3   6  -6   12.53    0.44
  -3   6  -6   13.24    0.26
   3  -6   6   12.40    0.55
  -2   6  -7    1.06    0.17
  -2   6  -7    0.97    0.13
   2  -6   7    1.28    0.25
  -1   6  -8    3.85    0.29
  -1   6  -8    3.99    0.22
   1  -6   8    4.19    0.36
   0   6  -9    0.21    0.14
   0  -6   9    0.32    0.19
   1   6 -10    6.53    0.38
  -1  -6  10    6.13    0.41
  -2  -6  11   13.37    0.60
  -3  -6  12    3.33    0.37
  -4  -6  13    0.30    0.21
  -5  -6  14    3.21    0.42
  -6  -6  15    1.80    0.36
  -7  -6  16    3.75    0.50
  -8  -6  17    0.23    0.28
 -13   7   3    0.44    0.24
 -12   7   2    0.06    0.19
 -12   7   2   -0.15    0.17
 -11   7   1    0.11    0.16
 -11   7   1    0.06    0.17
  11  -7  -1    0.42    0.24
 -10   7   0   -0.14    0.14
 -10   7   0    0.11    0.15
  10  -7   0    0.06    0.20
  -9   7  -1   -0.03    0.13
  -9   7  -1    0.14    0.13
   9  -7   1    0.14    0.20
  -8   7  -2    0.98    0.18
  -8   7  -2    0.44    0.16
   8  -7   2    1.09    0.27
  -7   7  -3   27.80    0.74
  -7   7  -3   27.29    0.62
   7  -7   3   26.65    0.80
  -6   7  -4    3.09    0.28
  -6   7  -4    2.91    0.20
   6  -7   4    2.44    0.37
  -5   7  -5    8.44    0.25
  -5   7  -5    7.37    0.39
   5  -7   5    8.32    0.57
  -4   7  -6   17.88    0.35
  -4   7  -6   16.72    0.55
   4  -7   6   16.82    0.66
  -3   7  -7    4.20    0.19
  -3   7  -7    4.75    0.32
   3  -7   7    4.89    0.44
  -2   7  -8    4.44    0.26
  -2   7  -8    4.60    0.31
   2  -7   8    5.04    0.41
  -1   7  -9   10.14    0.45
  -1   7  -9   10.63    0.36
   1  -7   9   10.38    0.49
   0   7 -10    0.00    0.13
   0   7 -10   -0.10    0.14
   0  -7  10    0.05    0.18
   1   7 -11    6.96    0.42
  -1  -7  11    6.70    0.46
   2   7 -12    0.22    0.16
  -2  -7  12   -0.03    0.18
   3   7 -13    4.13    0.37
  -3  -7  13    4.48    0.44
  -4  -7  14    0.01    0.22
  -5  -7  15    1.16    0.32
  -6  -7  16    0.00    0.24
  -7  -7  17    1.24    0.37
 -12   8   1    0.05    0.20
 -11   8   0    2.96    0.35
 -10   8  -1   -0.12    0.14
 -10   8  -1    0.00    0.15
  10  -8   1    0.19    0.24
  -9   8  -2    0.96    0.22
  -9   8  -2    1.14    0.20
   9  -8   2    0.95    0.27
  -8   8  -3    1.34    0.23
   8  -8   3    1.47    0.30
  -7   8  -4    0.08    0.13
   7  -8   4   -0.21    0.30
  -6   8  -5    7.00    0.41
   6  -8   5    7.55    0.60
  -5   8  -6   27.48    0.75
   5  -8   6   26.29    0.84
  -4   8  -7    1.18    0.22
   4  -8   7    1.42    0.34
  -3   8  -8    4.73    0.36
   3  -8   8    5.72    0.48
  -2   8  -9   15.21    0.58
   2  -8   9   15.78    0.62
  -1   8 -10    0.35    0.18
  -1   8 -10    0.25    0.17
   1  -8  10    0.39    0.23
   0   8 -11    2.27    0.28
   0   8 -11    2.53    0.25
   0  -8  11    1.89    0.31
   1   8 -12    2.51    0.30
   1   8 -12    2.34    0.25
  -1  -8  12    2.40    0.33
   2   8 -13    3.49    0.35
  -2  -8  13    2.93    0.38
   3   8 -14   -0.03    0.17
  -3  -8  14   -0.13    0.19
   4   8 -15    3.06    0.36
  -4  -8  15    3.77    0.46
   5   8 -16    3.56    0.41
  -5  -8  16    3.00    0.45
   6   8 -17    0.63    0.26
  -6  -8  17    0.61    0.31
   7   8 -18    0.00    0.24
  -7  -8  18    0.42    0.32
 -13   9   1    3.41    0.41
 -12   9   0    0.67    0.23
 -11   9  -1    3.59    0.38
 -10   9  -2    0.16    0.17
  -9   9  -3    0.25    0.18
   9  -9   3    0.13    0.28
  -8   9  -4    0.33    0.18
   8  -9   4    0.22    0.31
  -7   9  -5   -0.04    0.15
   7  -9   5   -0.24    0.29
  -6   9  -6    2.26    0.29
   6  -9   6    2.51    0.40
  -5   9  -7   -0.40    0.12
   5  -9   7    0.28    0.31
  -4   9  -8   13.89    0.56
   4  -9   8   15.51    0.63
  -3   9  -9   -0.07    0.15
   3  -9   9   -0.20    0.22
  -2   9 -10    0.36    0.17
   2  -9  10    0.22    0.22
  -1   9 -11   -0.31    0.13
   1  -9  11    0.00    0.18
   0   9 -12    8.75    0.49
   0  -9  12   10.14    0.54
   1   9 -13    0.02    0.17
  -1  -9  13   -0.22    0.19
   2   9 -14    0.54    0.22
  -2  -9  14    0.52    0.27
   3   9 -15    1.29    0.28
  -3  -9  15    1.88    0.37
   4   9 -16    1.86    0.33
  -4  -9  16    1.69    0.38
   5   9 -17    0.26    0.23
  -5  -9  17   -0.06    0.26
   6   9 -18    0.14    0.23
  -6  -9  18    0.20    0.31
 -13  10   0    3.50    0.43
 -12  10  -1    0.20    0.21
 -11  10  -2    6.29    0.48
 -10  10  -3    0.27    0.20
  -9  10  -4    2.17    0.31
  -8  10  -5   11.72    0.57
  -7  10  -6    1.08    0.25
   7 -10   6    0.96    0.35
  -6  10  -7    0.21    0.18
   6 -10   7   -0.01    0.29
  -5  10  -8    0.12    0.15
   5 -10   8   -0.19    0.25
  -4  10  -9   11.30    0.53
   4 -10   9   11.13    0.57
  -3  10 -10    7.18    0.45
   3 -10  10    6.27    0.47
  -2  10 -11    4.87    0.42
   2 -10  11    5.18    0.44
  -1  10 -12   20.33    0.75
   1 -10  12   21.69    0.80
   0  10 -13    1.77    0.29
   0 -10  13    1.85    0.34
   1  10 -14   -0.15    0.16
  -1 -10  14   -0.15    0.22
   2  10 -15    1.32    0.28
  -2 -10  15    1.14    0.33
   3  10 -16    6.05    0.49
  -3 -10  16    6.84    0.57
   4  10 -17    0.08    0.21
  -4 -10  17   -0.05    0.26
   5  10 -18    0.04    0.24
  -5 -10  18   -0.25    0.23
 -13  11  -1   -0.05    0.21
 -12  11  -2    0.16    0.20
 -11  11  -3    2.80    0.38
 -10  11  -4    2.78    0.36
  -9  11  -5   10.80    0.58
  -8  11  -6    6.63    0.46
  -7  11  -7    0.18    0.19
  -6  11  -8    7.01    0.46
   6 -11   8    7.43    0.54
  -5  11  -9    9.88    0.54
   5 -11   9    8.65    0.57
  -4  11 -10    3.19    0.36
   4 -11  10    2.99    0.38
  -3  11 -11    1.16    0.26
   3 -11  11    1.26    0.31
  -2  11 -12    2.87    0.35
   2 -11  12    2.44    0.38
  -1  11 -13    8.96    0.54
   1 -11  13    9.59    0.59
   0  11 -14    0.25    0.21
   0 -11  14    0.65    0.28
   1  11 -15    2.59    0.36
  -1 -11  15    2.10    0.39
   2  11 -16    2.63    0.37
  -2 -11  16    2.07    0.41
   3  11 -17    1.63    0.34
  -3 -11  17    1.97    0.42
 -12  12  -3    1.56    0.33
 -11  12  -4    0.68    0.26
 -10  12  -5    0.94    0.28
  -9  12  -6    7.39    0.53
  -8  12  -7    6.71    0.50
  -7  12  -8    0.57    0.22
  -6  12  -9    3.03    0.37
  -5  12 -10    6.75    0.49
   5 -12  10    5.47    0.48
  -4  12 -11    0.19    0.20
   4 -12  11    0.73    0.28
  -3  12 -12    6.37    0.47
   3 -12  12    6.23    0.50
  -2  12 -13    9.44    0.58
   2 -12  13    9.76    0.60
  -1  12 -14    0.92    0.28
   1 -12  14    0.64    0.29
   0  12 -15    0.77    0.28
   0 -12  15    0.85    0.32
   1  12 -16    2.96    0.41
  -1 -12  16    3.21    0.47
   2  12 -17    5.32    0.53
  -2 -12  17    5.74    0.62
 -11  13  -5    0.49    0.27
 -10  13  -6    3.37    0.43
  -9  13  -7   18.84    0.82
  -8  13  -8    0.71    0.28
  -7  13  -9    1.98    0.34
  -6  13 -10    3.65    0.42
  -5  13 -11    0.05    0.21
  -4  13 -12    1.26    0.31
  -3  13 -13   -0.14    0.20
   3 -13  13   -0.22    0.24
  -2  13 -14    0.97    0.29
   2 -13  14    1.68    0.37
  -1  13 -15    1.04    0.31
   1 -13  15    1.49    0.38
   0  13 -16    0.50    0.27
   0 -13  16   -0.17    0.28
   1  13 -17    5.67    0.56
  -1 -13  17    6.09    0.64
 -10  14  -7    3.79    0.47
  -9  14  -8    0.55    0.27
  -8  14  -9    0.66    0.27
  -7  14 -10    1.41    0.33
  -6  14 -11    8.14    0.60
  -5  14 -12    0.54    0.28
  -4  14 -13    0.40    0.25
  -3  14 -14   15.99    0.80
  -2  14 -15    4.68    0.53
  -1  14 -16    4.68    0.52
   1 -14  16    4.71    0.56
  -8  15 -10    1.23    0.35
  -7  15 -11    5.32    0.56
  -6  15 -12    2.58    0.42
  -5  15 -13    0.01    0.23
  -4  15 -14    0.78    0.31
  -2  16 -10    0.86    0.30
  -3  16  -9   -0.03    0.23
  -4  16  -8    2.48    0.39
  -5  16  -7    1.89    0.37
  -6  16  -6    0.14    0.25
  -7  16  -5    5.94    0.57
  -8  16  -4    7.18    0.57
   0  15 -11    8.70    0.60
  -1  15 -10    7.85    0.58
  -2  15  -9    0.04    0.22
  -3  15  -8    7.89    0.55
  -4  15  -7    4.77    0.48
  -5  15  -6    0.51    0.26
  -6  15  -5    0.73    0.29
  -7  15  -4    2.20    0.37
  -8  15  -3    1.40    0.33
  -9  15  -2    2.29    0.38
 -10  15  -1    1.87    0.37
   0  14 -10    3.15    0.39
  -1  14  -9    1.83    0.33
  -2  14  -8    2.12    0.34
  -3  14  -7    6.47    0.49
  -4  14  -6    3.03    0.38
  -5  14  -5    0.22    0.22
  -6  14  -4    7.57    0.54
  -7  14  -3    9.59    0.61
  -8  14  -2    0.61    0.25
  -9  14  -1    0.54    0.25
 -10  14   0    4.65    0.49
 -11  14   1    0.76    0.29
  -3 -13  12    0.27    0.28
  -2 -13  11    1.49    0.32
   1  13 -10    4.59    0.42
   0  13  -9    6.14    0.45
  -1  13  -8   -0.63    0.25
  -1  13  -8   -0.22    0.17
  -2  13  -7   -0.39    0.28
  -2  13  -7    0.53    0.22
  -3  13  -6    6.04    0.45
  -4  13  -5    0.17    0.20
  -5  13  -4    0.44    0.22
  -6  13  -3    0.15    0.19
  -7  13  -2    0.85    0.25
  -8  13  -1    0.76    0.25
  -9  13   0    0.56    0.25
 -10  13   1    1.24    0.29
 -11  13   2   -0.22    0.21
  -5 -12  13    0.44    0.30
  -4 -12  12    0.62    0.28
   4  12 -12   -0.06    0.29
  -3 -12  11    0.94    0.31
   3  12 -11    1.14    0.36
  -2 -12  10    0.26    0.22
   2  12 -10    0.21    0.31
   2  12 -10    0.24    0.21
  -1 -12   9    3.16    0.37
   1  12  -9    3.83    0.37
   1  12  -9    3.61    0.46
   0 -12   8    2.21    0.30
   0  12  -8    1.94    0.28
   0  12  -8    2.42    0.40
  -1  12  -7    0.25    0.19
  -1  12  -7   -0.10    0.27
  -2  12  -6    3.37    0.35
  -2  12  -6    3.00    0.41
  -3  12  -5   -0.01    0.18
  -3  12  -5   -0.25    0.23
  -4  12  -4   14.90    0.62
  -4  12  -4   13.57    0.66
  -5  12  -3    0.22    0.20
  -5  12  -3    0.04    0.22
  -6  12  -2    1.15    0.26
  -6  12  -2    0.87    0.27
  -7  12  -1    2.30    0.31
  -7  12  -1    1.65    0.31
  -8  12   0    2.99    0.38
  -8  12   0    2.32    0.33
  -9  12   1   -0.11    0.19
  -9  12   1   -0.09    0.16
 -10  12   2    0.82    0.26
 -10  12   2    1.31    0.32
 -11  12   3    1.28    0.31
 -11  12   3    1.36    0.31
 -12  12   4    0.22    0.23
 -12  12   4   -0.11    0.24
  -6 -11  13    0.23    0.28
   6  11 -13    0.29    0.30
  -5 -11  12    0.22    0.26
   5  11 -12    0.64    0.31
  -4 -11  11    0.34    0.25
   4  11 -11    0.46    0.29
  -3 -11  10   -0.01    0.20
   3  11 -10    0.48    0.27
  -2 -11   9    3.94    0.41
   2  11  -9    3.93    0.36
   2  11  -9    3.46    0.43
  -1 -11   8    0.99    0.25
   1  11  -8    1.73    0.35
   1  11  -8    1.41    0.25
   0 -11   7    0.33    0.19
   0  11  -7    0.17    0.19
   0  11  -7    0.14    0.26
   1 -11   6   -0.11    0.15
  -1  11  -6    0.24    0.27
  -1  11  -6   -0.23    0.15
  -2  11  -5    0.22    0.17
  -2  11  -5    0.15    0.25
  -3  11  -4    4.88    0.47
  -3  11  -4    5.49    0.39
  -4  11  -3    3.44    0.38
  -4  11  -3    2.91    0.30
  -5  11  -2    4.04    0.40
  -5  11  -2    3.71    0.35
  -6  11  -1    5.18    0.41
  -6  11  -1    4.31    0.40
  -7  11   0    3.07    0.36
  -7  11   0    2.56    0.33
  -8  11   1    0.30    0.20
  -8  11   1    0.17    0.19
  -9  11   2    3.38    0.40
  -9  11   2    3.46    0.38
 -10  11   3    1.34    0.30
 -10  11   3    1.13    0.31
 -11  11   4    0.53    0.26
 -11  11   4    0.94    0.29
 -12  11   5    0.00    0.23
  -7 -10  13    2.75    0.46
   7  10 -13    1.67    0.40
  -6 -10  12    0.04    0.24
   6  10 -12    0.28    0.28
  -5 -10  11    0.72    0.29
   5  10 -11    0.50    0.29
  -4 -10  10    0.84    0.27
   4  10 -10    0.54    0.28
  -3 -10   9   11.27    0.59
   3  10  -9   11.60    0.63
   3  10  -9   11.71    0.51
  -2 -10   8    0.40    0.21
   2  10  -8    0.32    0.25
   2  10  -8    0.29    0.17
  -1 -10   7    5.44    0.38
   1  10  -7    5.31    0.36
   1  10  -7    5.50    0.47
   0 -10   6    1.66    0.24
   0  10  -6    1.83    0.32
   0  10  -6    1.68    0.23
   1 -10   5    5.41    0.32
  -1  10  -5    5.33    0.46
  -1  10  -5    5.04    0.36
   2 -10   4    2.26    0.22
  -2  10  -4    2.02    0.26
  -2  10  -4    1.70    0.33
  -3  10  -3   -0.04    0.23
  -3  10  -3   -0.13    0.14
  -4  10  -2    0.17    0.16
  -4  10  -2    0.55    0.24
  -5  10  -1    0.47    0.19
  -5  10  -1    0.19    0.20
  -6  10   0    4.14    0.36
  -6  10   0    4.62    0.39
  -7  10   1    1.58    0.26
  -7  10   1    2.47    0.32
  -8  10   2    0.22    0.17
  -8  10   2    0.38    0.21
  -9  10   3    0.37    0.21
  -9  10   3    0.70    0.21
 -10  10   4   -0.14    0.17
 -10  10   4   -0.16    0.18
 -11  10   5    0.68    0.26
 -12  10   6    0.09    0.22
  -8  -9  13    0.64    0.31
   8   9 -13    0.99    0.35
  -7  -9  12    1.47    0.36
   7   9 -12    1.38    0.36
  -6  -9  11    0.27    0.26
   6   9 -11    0.59    0.28
  -5  -9  10   -0.01    0.21
   5   9 -10    0.17    0.24
  -4  -9   9    0.35    0.22
   4   9  -9    0.22    0.18
   4   9  -9    0.59    0.25
  -3  -9   8   19.15    0.72
   3   9  -8   18.66    0.74
   3   9  -8   18.56    0.60
  -2  -9   7    1.05    0.22
   2   9  -7    0.98    0.27
   2   9  -7    1.01    0.20
  -1  -9   6    1.05    0.21
   1   9  -6    1.22    0.20
   1   9  -6    1.02    0.29
   0  -9   5    0.33    0.15
   0   9  -5    0.13    0.14
   0   9  -5   -0.05    0.25
   1  -9   4    9.70    0.38
  -1   9  -4    8.72    0.41
  -1   9  -4    9.50    0.54
   2  -9   3   16.23    0.43
  -2   9  -3   16.54    0.65
  -2   9  -3   16.45    0.55
  -3   9  -2    1.98    0.32
  -3   9  -2    2.09    0.24
  -4   9  -1    2.69    0.33
  -4   9  -1    2.30    0.26
  -5   9   0    0.33    0.16
  -5   9   0    0.46    0.21
  -6   9   1    0.25    0.16
  -6   9   1    0.03    0.18
  -7   9   2    0.09    0.16
  -7   9   2    0.17    0.18
  -8   9   3    0.29    0.18
  -8   9   3    0.12    0.16
  -9   9   4   -0.14    0.15
  -9   9   4   -0.02    0.18
 -10   9   5    1.39    0.28
 -10   9   5    1.21    0.28
 -11   9   6   -0.01    0.18
 -12   9   7    1.08    0.30
 -13   9   8    0.23    0.24
  -8  -8  12    2.00    0.41
   8   8 -12    3.09    0.47
  -7  -8  11    1.48    0.36
   7   8 -11    1.83    0.39
  -6  -8  10    0.38    0.26
   6   8 -10    0.62    0.29
  -5  -8   9    1.07    0.27
   5   8  -9    1.24    0.30
  -4  -8   8    0.57    0.23
   4   8  -8    0.40    0.24
   4   8  -8    0.32    0.16
  -3  -8   7    2.97    0.33
   3   8  -7    2.76    0.25
   3   8  -7    3.90    0.39
  -2  -8   6    1.96    0.26
   2   8  -6    1.89    0.22
   2   8  -6    2.19    0.33
  -1  -8   5    4.49    0.32
   1   8  -5    3.30    0.36
   1   8  -5    4.57    0.30
   0  -8   4   43.04    0.88
   0   8  -4   42.56    0.85
   0   8  -4   44.59    1.01
   1  -8   3    2.73    0.21
  -1   8  -3    2.63    0.33
  -1   8  -3    2.66    0.24
   2  -8   2    4.62    0.22
  -2   8  -2    4.99    0.31
  -2   8  -2    4.98    0.42
   3  -8   1    0.50    0.08
  -3   8  -1    0.56    0.23
  -3   8  -1    0.24    0.12
  -4   8   0    8.31    0.46
  -4   8   0    7.83    0.39
  -5   8   1    4.23    0.37
  -5   8   1    4.83    0.33
  -6   8   2    0.33    0.16
  -6   8   2    0.60    0.22
  -7   8   3    0.91    0.23
  -7   8   3    0.59    0.19
  -8   8   4    0.43    0.20
  -8   8   4    0.63    0.22
  -9   8   5    0.95    0.23
  -9   8   5    0.37    0.22
 -10   8   6    4.92    0.47
 -11   8   7    2.49    0.38
 -12   8   8    0.29    0.23
 -13   8   9   -0.05    0.23
  -9  -7  12    4.00    0.53
  -8  -7  11    1.73    0.38
  -7  -7  10    2.06    0.38
  -6  -7   9    3.47    0.42
  -5  -7   8    1.87    0.30
   5   7  -8    2.29    0.24
   5   7  -8    1.87    0.31
  -4  -7   7   30.91    0.91
   4   7  -7   30.79    0.69
   4   7  -7   30.65    0.90
  -3  -7   6    6.57    0.40
   3   7  -6    6.22    0.42
   3   7  -6    6.22    0.31
  -2  -7   5    1.91    0.24
   2   7  -5    2.07    0.20
   2   7  -5    2.51    0.31
  -1  -7   4   27.76    0.68
   1   7  -4   27.06    0.61
   1   7  -4   27.45    0.75
   0  -7   3   24.97    0.59
   0   7  -3   27.07    0.72
   0   7  -3   26.29    0.59
   1  -7   2   32.12    0.62
  -1   7  -2   32.48    0.68
  -1   7  -2   33.30    0.81
   2  -7   1   20.46    0.39
  -2   7  -1   20.51    0.54
  -2   7  -1   20.47    0.64
  -3   7   0    7.04    0.42
  -3   7   0    7.14    0.34
  -4   7   1    8.41    0.43
  -4   7   1    6.90    0.35
  -5   7   2   -0.03    0.16
  -5   7   2    0.12    0.13
  -6   7   3   10.80    0.50
  -6   7   3   10.68    0.46
  -7   7   4   27.40    0.83
  -7   7   4   27.06    0.78
  -8   7   5    6.99    0.46
  -8   7   5    6.42    0.42
  -9   7   6    5.77    0.42
 -10   7   7    2.25    0.34
 -11   7   8    4.50    0.47
 -12   7   9    0.24    0.23
 -13   7  10   -0.08    0.21
 -10  -6  12    0.74    0.32
  -9  -6  11    0.27    0.26
  -8  -6  10    6.77    0.56
  -7  -6   9    6.61    0.52
  -6  -6   8    1.81    0.30
  -5  -6   7   30.21    0.91
   5   6  -7   28.94    0.66
  -4  -6   6   11.19    0.52
   4   6  -6   11.40    0.38
   4   6  -6   10.79    0.53
  -3  -6   5   10.96    0.47
   3   6  -5   11.46    0.37
   3   6  -5   11.96    0.50
  -2  -6   4   13.21    0.46
   2   6  -4   11.56    0.48
   2   6  -4   12.64    0.38
  -1  -6   3   67.11    1.16
   1   6  -3   67.98    1.22
   1   6  -3   68.12    1.03
   0  -6   2   77.81    1.21
   0   6  -2   78.52    1.33
   0   6  -2   79.23    1.16
   1  -6   1   14.54    0.34
  -1   6  -1   15.34    0.41
  -1   6  -1   14.82    0.50
   2  -6   0    9.02    0.19
  -2   6   0    9.48    0.42
  -2   6   0    9.24    0.33
  -3   6   1   72.51    1.17
  -3   6   1   72.56    1.30
  -4   6   2    1.21    0.16
  -4   6   2    1.19    0.20
  -5   6   3   31.96    0.81
  -5   6   3   30.49    0.72
  -6   6   4   39.15    0.89
  -6   6   4   39.71    0.97
  -6   6   4   39.53    0.66
  -7   6   5    0.22    0.17
  -7   6   5    0.64    0.14
  -7   6   5    0.75    0.21
  -8   6   6    6.01    0.44
  -9   6   7    4.61    0.41
 -10   6   8   15.00    0.70
 -11   6   9    5.59    0.50
 -12   6  10    0.16    0.23
 -13   6  11    1.90    0.39
 -11  -5  12    5.55    0.62
 -10  -5  11    0.14    0.27
  -9  -5  10    1.26    0.33
  -8  -5   9    9.88    0.60
  -7  -5   8   10.71    0.61
  -6  -5   7    3.11    0.37
  -5  -5   6   44.52    1.09
   5   5  -6   43.00    0.79
  -4  -5   5   71.87    1.41
   4   5  -5   74.50    1.10
  -3  -5   4    0.16    0.14
   3   5  -4    0.22    0.10
   3   5  -4   -0.28    0.15
  -2  -5   3   52.65    1.00
   2   5  -3   53.16    1.03
   2   5  -3   52.23    0.81
  -1  -5   2    7.42    0.30
   1   5  -2    7.35    0.25
   1   5  -2    6.32    0.35
   0  -5   1    7.27    0.25
   0   5  -1    7.28    0.25
   0   5  -1    7.75    0.37
   1  -5   0    0.04    0.06
  -1   5   0   -0.11    0.15
  -1   5   0   -0.06    0.07
  -2   5   1   35.23    0.66
  -2   5   1   36.55    0.79
  -3   5   2   38.14    0.73
  -3   5   2   37.79    0.81
  -4   5   3    5.10    0.33
  -4   5   3    6.34    0.31
  -4   5   3    5.50    0.14
  -5   5   4   48.94    0.95
  -5   5   4   47.70    1.02
  -5   5   4   48.42    0.75
  -6   5   5   56.82    1.21
  -6   5   5   59.03    0.95
  -7   5   6   40.93    0.81
  -7   5   6   42.43    1.05
  -8   5   7    9.14    0.39
  -8   5   7    8.64    0.49
  -9   5   8   62.94    1.23
  -9   5   8   63.02    1.45
 -10   5   9   14.44    0.70
 -11   5  10    0.33    0.23
 -12   5  11    1.95    0.37
 -13   5  12    4.24    0.54
 -11  -4  11    2.77    0.45
 -10  -4  10    0.35    0.27
  -9  -4   9    6.11    0.52
  -8  -4   8    5.48    0.47
  -7  -4   7    0.00    0.17
  -6  -4   6    7.12    0.45
  -5  -4   5   33.60    0.89
  -4  -4   4   16.11    0.56
  -3  -4   3    7.99    0.36
   3   4  -3    7.93    0.24
   2   4  -2   22.38    0.41
   2   4  -2   22.62    0.58
  -1  -4   1  204.30    2.66
   1   4  -1  199.46    2.34
   1   4  -1  198.51    2.70
   0  -4   0    6.10    0.21
   0   4   0    6.17    0.30
   0   4   0    5.78    0.20
   1  -4  -1  104.71    1.33
  -1   4   1  104.64    1.37
  -1   4   1  105.74    1.58
  -2   4   2   12.57    0.44
  -2   4   2   12.54    0.35
  -3   4   3    2.42    0.23
  -3   4   3    2.74    0.10
  -3   4   3    2.51    0.19
  -4   4   4   16.37    0.51
  -4   4   4   15.99    0.34
  -4   4   4   17.42    0.48
  -5   4   5   12.34    0.34
  -5   4   5   11.38    0.46
  -6   4   6    7.30    0.31
  -6   4   6    6.93    0.40
  -7   4   7   17.87    0.53
  -7   4   7   18.28    0.66
  -8   4   8   -0.09    0.13
  -8   4   8    0.06    0.15
  -9   4   9   34.73    1.04
  -9   4   9   35.66    0.90
 -10   4  10   10.46    0.51
 -10   4  10   10.47    0.60
 -11   4  11    0.42    0.25
 -12   4  12    3.98    0.49
 -12  -3  11    5.45    0.60
 -11  -3  10    0.82    0.32
 -10  -3   9    2.30    0.38
  -9  -3   8    6.67    0.50
  -8  -3   7    2.95    0.37
  -7  -3   6    2.79    0.33
  -6  -3   5   15.46    0.60
  -5  -3   4   92.62    1.64
  -4  -3   3    5.78    0.33
  -3  -3   2   14.72    0.46
   3   3  -2   14.75    0.29
  -2  -3   1    2.95    0.21
   2   3  -1    2.80    0.24
   2   3  -1    2.73    0.12
  -1  -3   0   17.03    0.38
   1   3   0   16.80    0.29
   1   3   0   16.87    0.44
   0  -3  -1   79.78    1.09
   0   3   1   78.20    1.01
   0   3   1   80.28    1.22
  -1   3   2   56.04    0.76
  -1   3   2   56.88    0.97
  -1   3   2   56.02    0.81
  -2   3   3  267.49    3.46
  -2   3   3  264.05    3.23
  -2   3   3  264.25    3.14
  -3   3   4   -0.04    0.10
  -3   3   4   -0.03    0.06
  -4   3   5   10.88    0.42
  -4   3   5   10.65    0.31
  -5   3   6   47.90    1.02
  -5   3   6   47.99    0.86
  -6   3   7    4.52    0.28
  -6   3   7    5.00    0.36
  -7   3   8    0.27    0.14
  -7   3   8    0.47    0.18
  -8   3   9    6.51    0.44
  -8   3   9    5.81    0.36
  -9   3  10   11.95    0.63
  -9   3  10   12.64    0.56
 -10   3  11    0.58    0.22
 -10   3  11    0.46    0.23
 -11   3  12    0.33    0.24
 -11   3  12    0.41    0.25
 -12   3  13    0.01    0.22
 -12  -2  10    0.89    0.32
 -11  -2   9    0.08    0.25
 -10  -2   8    9.72    0.61
  -9  -2   7    5.26    0.46
  -8  -2   6   13.02    0.60
  -7  -2   5    1.25    0.26
  -6  -2   4   46.85    1.07
  -5  -2   3   -0.04    0.11
  -4  -2   2    1.37    0.19
  -3  -2   1    0.07    0.09
  -2  -2   0    2.19    0.18
   2   2   0    1.99    0.18
  -1  -2  -1  167.53    2.19
   1   2   1  166.90    2.21
   1   2   1  167.40    1.87
   0   2   2  816.28   10.87
   0   2   2  825.49   10.92
  -1   2   3  302.67    3.83
  -1   2   3  300.42    3.73
  -2   2   4   18.44    0.47
  -2   2   4   18.73    0.37
  -3   2   5    0.09    0.08
  -3   2   5    0.08    0.10
  -4   2   6   35.16    0.79
  -4   2   6   34.06    0.68
  -5   2   7   11.99    0.49
  -5   2   7   11.56    0.40
  -6   2   8    5.10    0.35
  -6   2   8    5.00    0.31
  -7   2   9    3.60    0.35
  -7   2   9    3.63    0.30
  -8   2  10    1.24    0.27
  -8   2  10    1.38    0.24
  -9   2  11   10.99    0.55
  -9   2  11   10.65    0.61
 -10   2  12    0.10    0.20
 -10   2  12    0.04    0.17
 -11   2  13    0.59    0.27
 -11   2  13    0.54    0.26
 -12   2  14    3.68    0.50
 -12  -1   9    5.12    0.55
 -11  -1   8    1.79    0.34
 -10  -1   7    5.66    0.49
  -9  -1   6    2.99    0.37
  -8  -1   5    9.71    0.52
  -7  -1   4   15.21    0.60
  -6  -1   3   13.53    0.52
  -5  -1   2    6.52    0.34
  -4  -1   1    2.01    0.21
  -3  -1   0    3.84    0.23
  -2  -1  -1  137.58    1.87
   2   1   1  134.90    1.82
  -1  -1  -2  117.54    1.59
   1   1   2  118.09    1.58
   1   1   2  117.77    1.59
   0   1   3    0.56    0.15
   0   1   3    0.72    0.15
  -1   1   4  251.20    3.19
  -1   1   4  248.76    3.17
  -2   1   5    0.95    0.14
  -2   1   5    1.14    0.14
  -3   1   6   23.11    0.52
  -3   1   6   23.24    0.58
  -4   1   7    1.54    0.20
  -4   1   7    1.47    0.18
  -5   1   8    7.86    0.37
  -5   1   8    8.29    0.40
  -6   1   9    7.61    0.40
  -6   1   9    7.38    0.43
  -7   1  10    0.85    0.21
  -7   1  10    0.89    0.21
  -8   1  11   17.75    0.67
  -8   1  11   16.80    0.71
  -9   1  12   -0.03    0.18
  -9   1  12    0.14    0.20
 -10   1  13   -0.29    0.17
 -10   1  13    0.03    0.20
 -11   1  14    0.18    0.24
 -11   1  14    0.33    0.26
 -12   1  15   -0.15    0.24
 -12   1  15   -0.13    0.24
 -13   0   9    0.27    0.27
 -12   0   8    0.19    0.25
 -11   0   7    0.41    0.24
 -10   0   6    0.14    0.22
  -9   0   5    0.16    0.19
  -8   0   4    6.95    0.45
  -7   0   3    0.95    0.22
  -6   0   2    7.58    0.40
  -5   0   1   10.32    0.40
  -4   0   0   41.78    0.82
  -4   0   0   40.97    0.58
  -3   0  -1    0.06    0.04
  -3   0  -1    0.09    0.09
  -2   0  -2    0.39    0.11
  -2   0  -2    0.54    0.06
   2   0   2    0.22    0.11
   1   0   3    3.08    0.22
   1   0   3    2.09    0.19
   0   0   4    2.19    0.19
   0   0   4    1.89    0.22
  -1   0   5   61.53    0.95
  -1   0   5   61.86    0.99
  -2   0   6    3.77    0.25
  -2   0   6    3.52    0.21
  -3   0   7   33.34    0.72
  -3   0   7   33.20    0.72
  -4   0   8    0.42    0.15
  -4   0   8    0.48    0.14
  -5   0   9    6.84    0.37
  -5   0   9    6.32    0.37
  -6   0  10    0.99    0.22
  -6   0  10    1.58    0.25
  -7   0  11    7.60    0.46
  -7   0  11    7.78    0.46
  -8   0  12    0.02    0.16
  -8   0  12   -0.15    0.15
  -9   0  13    0.94    0.25
  -9   0  13    1.00    0.28
 -10   0  14   -0.12    0.22
 -10   0  14   -0.04    0.21
 -11   0  15    1.93    0.38
 -11   0  15    1.26    0.35
 -13   1   8    0.20    0.26
 -12   1   7   -0.26    0.20
 -11   1   6    1.13    0.29
 -10   1   5    5.47    0.44
  -9   1   4    3.16    0.34
  -8   1   3    0.69    0.22
  -7   1   2    0.47    0.18
  -6   1   1   10.37    0.44
  -5   1   0   71.42    1.24
  -5   1   0   69.93    0.98
  -4   1  -1    1.08    0.10
  -4   1  -1    1.08    0.16
  -3   1  -2   21.50    0.37
  -3   1  -2   22.49    0.51
  -2   1  -3    1.42    0.11
   2  -1   3    1.29    0.11
   2  -1   3    1.14    0.18
   1  -1   4   38.73    0.58
   1  -1   4   38.11    0.75
   0  -1   5    3.59    0.17
   0  -1   5    3.42    0.29
  -1  -1   6    0.62    0.11
  -1  -1   6    0.77    0.16
  -2  -1   7   12.84    0.38
  -2  -1   7   12.82    0.43
  -3  -1   8    1.58    0.21
  -3  -1   8    1.59    0.19
  -4  -1   9    6.86    0.38
  -4  -1   9    6.90    0.37
  -5  -1  10    1.36    0.22
  -5  -1  10    1.51    0.25
  -6  -1  11    1.50    0.25
  -6  -1  11    1.40    0.25
  -7  -1  12    5.01    0.40
  -7  -1  12    6.33    0.43
  -8  -1  13    2.84    0.36
  -8  -1  13    2.45    0.35
  -9  -1  14    1.47    0.32
  -9  -1  14    1.47    0.33
 -10  -1  15    1.35    0.34
 -10  -1  15    1.81    0.36
 -11  -1  16    7.07    0.61
 -13   2   7    0.21    0.24
 -12   2   6    0.14    0.24
 -11   2   5    2.01    0.34
 -10   2   4    0.07    0.20
  -9   2   3    2.04    0.30
  -8   2   2    1.05    0.23
  -7   2   1    5.56    0.27
  -7   2   1    4.82    0.34
  -6   2   0    8.84    0.39
  -6   2   0    8.70    0.30
  -5   2  -1    1.23    0.13
  -5   2  -1    1.28    0.18
  -4   2  -2    9.05    0.27
  -4   2  -2    8.85    0.34
   4  -2   2    8.40    0.35
  -3   2  -3   16.00    0.35
   3  -2   3   16.01    0.45
  -2   2  -4   13.15    0.32
   2  -2   4   13.06    0.43
   2  -2   4   12.98    0.23
   1  -2   5    8.81    0.18
   1  -2   5    9.66    0.44
   0  -2   6    0.25    0.17
   0  -2   6   -0.01    0.05
  -1  -2   7   29.23    0.67
  -1  -2   7   29.45    0.56
  -2  -2   8   20.20    0.50
  -2  -2   8   19.89    0.57
  -3  -2   9    8.45    0.37
  -3  -2   9    8.55    0.41
  -4  -2  10    1.60    0.21
  -4  -2  10    1.86    0.26
  -5  -2  11    5.72    0.42
  -5  -2  11    6.65    0.40
  -6  -2  12    6.64    0.44
  -6  -2  12    6.73    0.46
  -7  -2  13    9.82    0.57
  -7  -2  13    8.99    0.52
  -8  -2  14    2.45    0.37
  -8  -2  14    2.40    0.36
  -9  -2  15    0.01    0.23
 -10  -2  16    0.42    0.29
 -14   3   7    0.14    0.26
 -13   3   6    0.25    0.26
 -12   3   5    0.02    0.23
 -11   3   4    7.87    0.52
 -10   3   3    0.11    0.19
  -9   3   2    0.99    0.22
  -9   3   2    1.09    0.25
  -8   3   1    0.52    0.15
  -8   3   1    0.47    0.17
  -8   3   1    0.72    0.21
  -7   3   0    9.27    0.38
  -7   3   0    9.55    0.36
  -7   3   0    9.14    0.44
  -6   3  -1    0.96    0.14
  -6   3  -1    0.87    0.14
  -6   3  -1    1.01    0.19
  -5   3  -2    2.06    0.17
  -5   3  -2    2.47    0.17
   5  -3   2    2.35    0.23
  -4   3  -3    4.96    0.22
   4  -3   3    4.46    0.30
  -3   3  -4    1.12    0.13
   3  -3   4    1.17    0.20
  -2   3  -5    5.80    0.25
   2  -3   5    5.73    0.40
  -1   3  -6   21.21    0.49
   1  -3   6   20.42    0.59
   0  -3   7   20.85    0.40
   0  -3   7   20.82    0.57
  -1  -3   8    5.60    0.24
  -1  -3   8    5.27    0.33
  -2  -3   9   24.88    0.59
  -2  -3   9   24.26    0.68
  -3  -3  10   15.04    0.49
  -3  -3  10   14.91    0.57
  -4  -3  11   19.41    0.68
  -4  -3  11   19.81    0.63
  -5  -3  12    7.53    0.44
  -5  -3  12    7.59    0.48
  -6  -3  13   13.16    0.63
  -6  -3  13   12.17    0.59
  -7  -3  14    2.29    0.34
  -7  -3  14    2.10    0.36
  -8  -3  15    0.02    0.22
  -9  -3  16    4.75    0.53
 -10  -3  17    0.37    0.30
 -14   4   6    0.66    0.30
 -13   4   5    0.27    0.26
 -12   4   4    1.12    0.30
 -11   4   3    0.41    0.23
 -10   4   2   -0.02    0.18
 -10   4   2    0.15    0.16
  -9   4   1    1.06    0.24
  -9   4   1    1.20    0.22
  -9   4   1    1.01    0.19
  -8   4   0    9.99    0.41
  -8   4   0    9.27    0.41
  -8   4   0   10.35    0.49
  -7   4  -1    2.26    0.27
  -7   4  -1    2.45    0.23
  -7   4  -1    2.78    0.23
   7  -4   1    2.43    0.29
  -6   4  -2    8.80    0.34
  -6   4  -2    8.68    0.31
   6  -4   2    9.19    0.43
  -5   4  -3   11.74    0.38
  -5   4  -3   11.62    0.31
   5  -4   3   11.47    0.43
  -4   4  -4    1.58    0.16
   4  -4   4    1.48    0.24
  -3   4  -5    0.12    0.09
   3  -4   5    0.08    0.22
  -2   4  -6    7.84    0.30
   2  -4   6    8.90    0.47
  -1   4  -7    0.06    0.09
   1  -4   7    0.38    0.19
   0  -4   8    4.55    0.33
  -1  -4   9    4.85    0.35
  -2  -4  10    2.64    0.30
  -3  -4  11    6.75    0.45
  -4  -4  12    7.39    0.48
  -5  -4  13   17.87    0.74
  -6  -4  14    4.45    0.47
  -7  -4  15    0.54    0.27
  -8  -4  16   10.01    0.67
  -9  -4  17    6.18    0.62
 -13   5   4    8.42    0.61
 -12   5   3    5.07    0.48
 -11   5   2    0.87    0.24
 -11   5   2    1.06    0.28
 -10   5   1    5.06    0.37
 -10   5   1    5.15    0.41
 -10   5   1    5.02    0.37
  -9   5   0    9.07    0.44
  -9   5   0    9.28    0.42
  -9   5   0    9.92    0.50
   9  -5   0    9.88    0.50
  -8   5  -1   -0.19    0.10
  -8   5  -1    0.08    0.12
   8  -5   1   -0.30    0.19
  -7   5  -2    3.88    0.25
  -7   5  -2    3.84    0.28
   7  -5   2    4.04    0.35
  -6   5  -3    0.89    0.16
  -6   5  -3    0.91    0.13
   6  -5   3    0.66    0.22
  -5   5  -4    8.69    0.24
  -5   5  -4    8.58    0.36
   5  -5   4    8.50    0.45
  -4   5  -5    4.27    0.27
   4  -5   5    4.22    0.37
  -3   5  -6   35.21    0.73
   3  -5   6   34.13    0.85
  -2   5  -7  120.09    1.73
   2  -5   7  120.21    1.93
  -1   5  -8    3.43    0.27
  -1   5  -8    3.56    0.17
   1  -5   8    3.25    0.32
   0   5  -9    7.03    0.36
   0  -5   9    6.49    0.42
  -1  -5  10   63.89    1.30
  -2  -5  11    0.24    0.20
  -3  -5  12    7.26    0.48
  -4  -5  13    0.21    0.20
  -5  -5  14    3.86    0.43
  -6  -5  15    2.62    0.40
  -7  -5  16    3.48    0.48
  -8  -5  17    7.49    0.63
 -13   6   3   18.45    0.81
  13  -6  -3   19.43    0.82
 -12   6   2    3.07    0.42
  12  -6  -2    3.60    0.41
 -11   6   1    0.25    0.18
 -11   6   1    0.29    0.24
 -11   6   1    0.58    0.19
  11  -6  -1    0.58    0.25
 -10   6   0    3.01    0.31
 -10   6   0    3.10    0.31
  10  -6   0    3.08    0.36
  -9   6  -1    0.45    0.16
  -9   6  -1    0.75    0.17
   9  -6   1    0.36    0.22
  -8   6  -2   26.95    0.71
  -8   6  -2   25.07    0.64
   8  -6   2   25.18    0.76
  -7   6  -3    0.15    0.10
  -7   6  -3    0.13    0.13
   7  -6   3    0.05    0.23
  -6   6  -4   51.37    1.00
  -6   6  -4   52.28    0.85
   6  -6   4   52.08    1.12
  -5   6  -5    0.53    0.15
  -5   6  -5    0.48    0.08
   5  -6   5    0.64    0.29
  -4   6  -6    3.68    0.28
   4  -6   6    4.43    0.42
  -3   6  -7   41.30    0.86
   3  -6   7   39.96    0.97
  -2   6  -8   15.70    0.51
   2  -6   8   17.34    0.63
  -1   6  -9    1.37    0.14
  -1   6  -9    1.57    0.22
   1  -6   9    1.18    0.27
   0   6 -10    8.09    0.42
   0  -6  10    8.57    0.50
   1   6 -11   52.25    1.09
  -1  -6  11   53.05    1.20
  -2  -6  12   14.19    0.64
  -3  -6  13   -0.24    0.16
  -4  -6  14   11.34    0.63
  -5  -6  15   23.67    0.93
  -6  -6  16    0.83    0.32
  -8  -6  18    6.59    0.67
 -12   7   1    5.55    0.42
 -12   7   1    5.64    0.44
  12  -7  -1    6.49    0.49
 -11   7   0    8.34    0.47
 -11   7   0    9.06    0.51
  11  -7   0    8.44    0.52
 -10   7  -1   23.67    0.71
 -10   7  -1   22.34    0.72
  10  -7   1   23.28    0.79
  -9   7  -2    1.34    0.21
  -9   7  -2    0.54    0.18
   9  -7   2    1.37    0.28
  -8   7  -3    4.41    0.33
  -8   7  -3    3.41    0.24
   8  -7   3    4.14    0.39
  -7   7  -4   35.16    0.68
  -7   7  -4   34.32    0.85
   7  -7   4   33.69    0.93
  -6   7  -5    7.03    0.39
   6  -7   5    8.77    0.57
  -5   7  -6    3.64    0.29
   5  -7   6    3.55    0.43
  -4   7  -7   42.54    0.92
   4  -7   7   42.58    1.07
  -3   7  -8  145.25    2.15
   3  -7   8  148.17    2.35
  -2   7  -9   19.38    0.61
   2  -7   9   19.45    0.67
  -1   7 -10   -0.03    0.13
  -1   7 -10    0.14    0.13
   1  -7  10    0.10    0.20
   0   7 -11   24.22    0.72
   0   7 -11   23.10    0.57
   0  -7  11   22.35    0.77
   1   7 -12   19.57    0.66
  -1  -7  12   19.00    0.72
   2   7 -13    0.48    0.18
  -2  -7  13    0.47    0.24
   3   7 -14    8.51    0.49
  -3  -7  14    7.56    0.52
  -4  -7  15    6.65    0.54
  -5  -7  16    0.44    0.26
  -6  -7  17    0.66    0.32
  -7  -7  18    5.30    0.60
 -13   8   1   19.51    0.78
 -12   8   0    0.15    0.19
 -11   8  -1   21.48    0.75
 -10   8  -2    6.29    0.43
  10  -8   2    6.06    0.50
  -9   8  -3    0.07    0.15
   9  -8   3    0.10    0.25
  -8   8  -4    4.76    0.36
   8  -8   4    6.33    0.52
  -7   8  -5   22.26    0.70
   7  -8   5   22.61    0.84
  -6   8  -6   31.04    0.83
   6  -8   6   31.08    0.95
  -5   8  -7    6.49    0.40
   5  -8   7    6.54    0.58
  -4   8  -8   83.22    1.50
   4  -8   8   87.72    1.67
  -3   8  -9   37.99    0.92
   3  -8   9   39.52    1.01
  -2   8 -10    9.12    0.47
   2  -8  10    9.25    0.52
  -1   8 -11   27.52    0.79
   1  -8  11   26.36    0.85
   0   8 -12   34.52    0.92
   0  -8  12   36.04    1.02
   1   8 -13    0.19    0.17
  -1  -8  13    0.21    0.23
   2   8 -14    0.29    0.19
  -2  -8  14   -0.09    0.19
   3   8 -15   10.40    0.56
  -3  -8  15    9.80    0.61
   4   8 -16    3.78    0.40
  -4  -8  16    3.92    0.48
   5   8 -17   -0.21    0.20
  -5  -8  17   -0.15    0.23
   6   8 -18    6.57    0.56
  -6  -8  18    7.28    0.64
 -13   9   0    0.50    0.25
 -12   9  -1    5.75    0.46
 -11   9  -2    4.98    0.44
 -10   9  -3    2.89    0.34
  -9   9  -4    6.82    0.45
   9  -9   4    7.68    0.59
  -8   9  -5   15.42    0.61
   8  -9   5   15.88    0.76
  -7   9  -6    4.02    0.37
   7  -9   6    3.94    0.47
  -6   9  -7    8.79    0.48
   6  -9   7    8.48    0.59
  -5   9  -8   10.14    0.50
   5  -9   8    9.63    0.63
  -4   9  -9   32.48    0.89
   4  -9   9   33.95    0.95
  -3   9 -10    4.42    0.38
   3  -9  10    4.55    0.43
  -2   9 -11    0.38    0.19
   2  -9  11    0.39    0.25
  -1   9 -12    1.76    0.26
   1  -9  12    1.67    0.30
   0   9 -13    0.08    0.18
   0  -9  13    0.14    0.21
   1   9 -14    0.02    0.17
  -1  -9  14    0.49    0.26
   2   9 -15   12.08    0.60
  -2  -9  15   10.78    0.63
   3   9 -16    7.78    0.52
  -3  -9  16    7.48    0.58
   4   9 -17   -0.15    0.21
  -4  -9  17    0.00    0.26
   5   9 -18    1.91    0.35
  -5  -9  18    2.52    0.46
 -13  10  -1    0.33    0.22
 -12  10  -2    5.58    0.50
 -11  10  -3    0.04    0.19
 -10  10  -4   -0.22    0.15
  -9  10  -5    0.23    0.18
  -8  10  -6    3.46    0.37
   8 -10   6    3.92    0.48
  -7  10  -7    4.35    0.40
   7 -10   7    3.36    0.45
  -6  10  -8    0.88    0.23
   6 -10   8    0.82    0.34
  -5  10  -9   18.33    0.68
   5 -10   9   17.56    0.74
  -4  10 -10    1.06    0.24
   4 -10  10    1.17    0.32
  -3  10 -11    0.11    0.19
   3 -10  11    0.31    0.26
  -2  10 -12    0.53    0.20
   2 -10  12    0.36    0.25
  -1  10 -13    0.09    0.19
   1 -10  13    0.11    0.25
   0  10 -14    0.13    0.18
   0 -10  14    0.05    0.25
   1  10 -15    1.69    0.32
  -1 -10  15    2.46    0.40
   2  10 -16    2.05    0.34
  -2 -10  16    2.02    0.39
   3  10 -17   -0.10    0.20
  -3 -10  17    0.19    0.28
   4  10 -18    0.35    0.24
  -4 -10  18    0.09    0.27
 -13  11  -2   -0.01    0.22
 -12  11  -3    0.02    0.20
 -11  11  -4   -0.01    0.19
 -10  11  -5    0.78    0.26
  -9  11  -6    1.27    0.28
  -8  11  -7    4.76    0.44
  -7  11  -8    0.75    0.23
   7 -11   8   -0.15    0.32
  -6  11  -9    0.35    0.18
   6 -11   9    0.21    0.31
  -5  11 -10    0.28    0.19
   5 -11  10    0.19    0.29
  -4  11 -11    0.57    0.23
   4 -11  11    0.02    0.25
  -3  11 -12    1.09    0.25
   3 -11  12    1.03    0.31
  -2  11 -13    0.88    0.26
   2 -11  13    1.16    0.32
  -1  11 -14    5.61    0.50
   1 -11  14    5.42    0.52
   0  11 -15    0.32    0.21
   0 -11  15   -0.22    0.23
   1  11 -16    0.03    0.21
  -1 -11  16    0.20    0.26
   2  11 -17    0.21    0.23
  -2 -11  17   -0.06    0.24
   3  11 -18    0.30    0.25
  -3 -11  18    0.28    0.31
 -12  12  -4    0.05    0.21
 -11  12  -5    2.24    0.35
 -10  12  -6    1.84    0.34
  -9  12  -7    1.78    0.32
  -8  12  -8    0.78    0.26
  -7  12  -9   -0.03    0.20
  -6  12 -10    0.01    0.19
  -5  12 -11    1.34    0.29
   5 -12  11    0.57    0.31
  -4  12 -12    0.39    0.23
   4 -12  12    0.08    0.26
  -3  12 -13   -0.05    0.20
   3 -12  13   -0.01    0.26
  -2  12 -14    0.48    0.23
   2 -12  14    0.07    0.28
  -1  12 -15    2.37    0.37
   1 -12  15    2.01    0.39
   0  12 -16    4.85    0.49
   0 -12  16    4.88    0.55
   1  12 -17    3.76    0.46
  -1 -12  17    2.80    0.49
   2  12 -18    3.75    0.46
  -2 -12  18    5.03    0.60
 -11  13  -6    2.81    0.42
 -10  13  -7    0.64    0.27
  -9  13  -8    4.84    0.49
  -8  13  -9    1.81    0.35
  -7  13 -10    2.53    0.38
  -6  13 -11   10.99    0.63
  -5  13 -12    0.09    0.21
  -4  13 -13   -0.13    0.20
   4 -13  13   -0.46    0.26
  -3  13 -14   -0.04    0.22
   3 -13  14   -0.03    0.27
  -2  13 -15    2.82    0.41
   2 -13  15    3.21    0.47
  -1  13 -16    2.84    0.41
   1 -13  16    2.38    0.44
   0  13 -17   -0.16    0.22
   0 -13  17   -0.20    0.28
 -10  14  -8    0.67    0.28
  -9  14  -9    2.06    0.39
  -8  14 -10    5.98    0.57
  -7  14 -11   -0.14    0.18
  -6  14 -12    5.62    0.55
  -5  14 -13    1.54    0.34
  -4  14 -14    0.37    0.27
  -3  14 -15    6.58    0.60
  -2  14 -16   10.21    0.68
   2 -14  16   10.20    0.71
  -2  16  -9    0.31    0.27
  -3  16  -8    1.06    0.31
  -4  16  -7   -0.36    0.21
  -5  16  -6    0.25    0.25
  -6  16  -5   -0.14    0.22
  -7  16  -4    1.56    0.36
  -8  16  -3    1.89    0.39
  -1  15  -9    1.69    0.34
  -2  15  -8    0.14    0.22
  -3  15  -7    1.92    0.34
  -4  15  -6    1.41    0.32
  -5  15  -5    0.33    0.24
  -6  15  -4    1.02    0.29
  -7  15  -3    4.53    0.48
  -8  15  -2    0.58    0.26
  -9  15  -1    0.90    0.31
   0  14  -9    4.56    0.44
  -1  14  -8   -0.39    0.16
  -2  14  -7    0.90    0.27
  -3  14  -6    0.87    0.26
  -4  14  -5    0.18    0.21
  -5  14  -4   -0.07    0.18
  -6  14  -3    0.00    0.21
  -7  14  -2   11.13    0.63
  -8  14  -1    7.71    0.54
  -9  14   0    0.81    0.28
 -10  14   1    7.77    0.59
  -4 -13  12    2.78    0.45
   4  13 -12    3.02    0.51
  -3 -13  11    0.08    0.25
   3  13 -11    0.22    0.35
   2  13 -10   -0.09    0.32
   1  13  -9    5.76    0.44
   1  13  -9    5.16    0.56
   0  13  -8    1.78    0.30
   0  13  -8    2.47    0.43
  -1  13  -7    0.39    0.22
  -1  13  -7    0.52    0.33
  -2  13  -6    0.36    0.31
  -2  13  -6    0.07    0.19
  -3  13  -5    5.41    0.54
  -3  13  -5    5.85    0.45
  -4  13  -4    0.09    0.19
  -4  13  -4   -0.20    0.26
  -5  13  -3    2.20    0.33
  -5  13  -3    2.89    0.39
  -6  13  -2    0.39    0.22
  -6  13  -2    0.24    0.24
  -7  13  -1    3.41    0.41
  -7  13  -1    2.22    0.36
  -8  13   0    0.58    0.26
  -8  13   0    0.94    0.27
  -9  13   1    1.29    0.31
  -9  13   1    0.93    0.28
 -10  13   2    1.51    0.35
 -10  13   2    1.10    0.30
 -11  13   3    1.50    0.35
  -5 -12  12    0.79    0.31
   5  12 -12    0.75    0.35
  -4 -12  11    4.75    0.52
   4  12 -11    4.19    0.53
  -3 -12  10    0.17    0.24
   3  12 -10    0.27    0.32
  -2 -12   9    2.16    0.35
   2  12  -9    2.47    0.42
  -1 -12   8    7.94    0.50
   1  12  -8    7.75    0.60
   1  12  -8    8.10    0.46
   0  12  -7    0.12    0.17
   0  12  -7   -0.01    0.28
  -1  12  -6    1.78    0.39
  -1  12  -6    1.89    0.29
  -2  12  -5    0.51    0.33
  -2  12  -5    0.91    0.23
  -3  12  -4    5.57    0.41
  -3  12  -4    4.48    0.48
  -4  12  -3    0.76    0.22
  -4  12  -3    1.29    0.33
  -5  12  -2   19.17    0.72
  -5  12  -2   18.49    0.76
  -6  12  -1   16.62    0.71
  -6  12  -1   17.90    0.70
  -7  12   0    2.10    0.34
  -7  12   0    2.19    0.31
  -8  12   1    1.78    0.31
  -8  12   1    1.89    0.33
  -9  12   2    7.84    0.53
  -9  12   2    7.35    0.54
 -10  12   3    1.01    0.28
 -10  12   3    1.41    0.33
 -11  12   4    0.78    0.28
 -11  12   4    0.73    0.27
 -12  12   5    1.08    0.33
  -6 -11  12    0.93    0.34
   6  11 -12    1.09    0.37
  -5 -11  11    2.22    0.39
   5  11 -11    2.55    0.41
  -4 -11  10    1.51    0.34
   4  11 -10    1.66    0.38
  -3 -11   9    2.09    0.34
   3  11  -9    2.01    0.38
  -2 -11   8    4.25    0.42
   2  11  -8    4.64    0.48
   2  11  -8    3.98    0.35
  -1 -11   7    0.28    0.19
   1  11  -7   -0.31    0.26
   1  11  -7   -0.09    0.15
   0 -11   6    1.72    0.25
   0  11  -6    2.06    0.27
   0  11  -6    2.21    0.37
  -1  11  -5    0.06    0.16
  -1  11  -5    0.14    0.27
  -2  11  -4   12.96    0.55
  -2  11  -4   10.04    0.61
  -3  11  -3   21.54    0.69
  -3  11  -3   19.16    0.77
  -4  11  -2    0.85    0.21
  -4  11  -2    1.02    0.30
  -5  11  -1   34.16    0.93
  -5  11  -1   35.74    1.00
  -6  11   0    2.98    0.37
  -6  11   0    3.30    0.34
  -7  11   1    0.43    0.22
  -7  11   1    0.19    0.19
  -8  11   2    0.65    0.24
  -8  11   2    0.12    0.19
  -9  11   3    6.97    0.51
  -9  11   3    6.99    0.50
 -10  11   4    1.99    0.36
 -10  11   4    1.71    0.31
 -11  11   5    0.11    0.22
 -12  11   6    4.20    0.51
  -7 -10  12    0.63    0.31
   7  10 -12    1.06    0.35
  -6 -10  11    3.28    0.45
   6  10 -11    3.30    0.48
  -5 -10  10    8.09    0.58
   5  10 -10    7.52    0.59
  -4 -10   9    1.28    0.30
   4  10  -9    1.07    0.32
  -3 -10   8   27.84    0.91
   3  10  -8   29.41    0.76
   3  10  -8   28.38    0.95
  -2 -10   7   13.29    0.59
   2  10  -7   13.73    0.67
   2  10  -7   12.96    0.50
  -1 -10   6    1.38    0.24
   1  10  -6    0.93    0.19
   1  10  -6    1.47    0.32
   0 -10   5    0.97    0.19
   0  10  -5    0.98    0.20
   0  10  -5    1.03    0.31
   1 -10   4   30.71    0.71
  -1  10  -4   30.81    0.79
  -1  10  -4   31.98    0.95
  -2  10  -3   10.40    0.46
  -2  10  -3   11.19    0.61
  -3  10  -2    0.10    0.25
  -3  10  -2    0.04    0.13
  -4  10  -1    5.24    0.37
  -4  10  -1    4.68    0.43
  -5  10   0   14.48    0.62
  -5  10   0   15.86    0.60
  -6  10   1    8.84    0.48
  -6  10   1    8.63    0.51
  -7  10   2    7.74    0.49
  -7  10   2    6.60    0.44
  -8  10   3    7.78    0.49
  -8  10   3    7.64    0.51
  -9  10   4    5.86    0.46
  -9  10   4    5.49    0.47
 -10  10   5    0.42    0.21
 -10  10   5   -0.06    0.21
 -11  10   6    8.33    0.58
 -12  10   7    2.48    0.41
  -8  -9  12   -0.13    0.25
   8   9 -12    0.65    0.33
  -7  -9  11    4.04    0.50
   7   9 -11    3.37    0.49
  -6  -9  10   10.77    0.67
   6   9 -10    9.60    0.65
  -5  -9   9   10.57    0.61
   5   9  -9   10.06    0.63
  -4  -9   8    0.01    0.20
   4   9  -8    0.33    0.26
  -3  -9   7   30.58    0.92
   3   9  -7   30.99    0.96
   3   9  -7   30.55    0.74
  -2  -9   6   17.94    0.64
   2   9  -6   16.97    0.70
   2   9  -6   16.84    0.53
  -1  -9   5    0.18    0.15
   1   9  -5    0.08    0.13
   1   9  -5    0.19    0.23
   0  -9   4    5.34    0.31
   0   9  -4    5.19    0.33
   0   9  -4    5.62    0.50
   1  -9   3    9.07    0.35
  -1   9  -3    9.23    0.56
  -1   9  -3    9.90    0.43
   2  -9   2   16.50    0.41
  -2   9  -2   15.49    0.53
  -2   9  -2   17.62    0.69
  -3   9  -1   -0.01    0.12
  -3   9  -1    0.29    0.25
  -4   9   0   25.17    0.71
  -4   9   0   25.54    0.80
  -5   9   1    7.11    0.46
  -5   9   1    7.01    0.40
  -6   9   2    0.67    0.21
  -6   9   2    0.64    0.19
  -7   9   3    9.01    0.51
  -7   9   3    9.70    0.50
  -8   9   4   20.03    0.73
  -8   9   4   20.27    0.78
  -9   9   5    0.26    0.21
  -9   9   5    0.08    0.16
 -10   9   6    1.67    0.32
 -11   9   7    5.69    0.50
 -12   9   8    0.97    0.31
  -9  -8  12    0.22    0.28
  -8  -8  11    0.39    0.29
   8   8 -11    0.97    0.32
  -7  -8  10    4.65    0.52
   7   8 -10    4.66    0.50
  -6  -8   9    7.31    0.55
   6   8  -9    8.39    0.58
  -5  -8   8   -0.14    0.19
   5   8  -8    0.28    0.23
  -4  -8   7   18.85    0.72
   4   8  -7   17.62    0.72
   4   8  -7   17.27    0.53
  -3  -8   6    6.63    0.42
   3   8  -6    6.34    0.32
   3   8  -6    6.16    0.45
  -2  -8   5    0.06    0.14
   2   8  -5    0.12    0.12
   2   8  -5    0.25    0.23
  -1  -8   4    0.73    0.18
   1   8  -4    0.20    0.25
   1   8  -4    0.67    0.15
   0  -8   3    3.77    0.26
   0   8  -3    3.74    0.26
   0   8  -3    3.35    0.37
   1  -8   2   21.86    0.50
  -1   8  -2   20.94    0.57
  -1   8  -2   22.80    0.74
   2  -8   1    2.19    0.15
  -2   8  -1    1.55    0.19
  -2   8  -1    2.47    0.34
  -3   8   0   20.71    0.71
  -3   8   0   21.07    0.58
  -4   8   1   15.98    0.53
  -4   8   1   15.68    0.60
  -5   8   2    0.00    0.19
  -5   8   2   -0.14    0.12
  -6   8   3    7.15    0.46
  -6   8   3    7.98    0.42
  -7   8   4   13.49    0.61
  -7   8   4   12.12    0.53
  -8   8   5   -0.05    0.16
  -8   8   5   -0.06    0.18
  -9   8   6    1.59    0.31
 -10   8   7    7.23    0.52
 -11   8   8    0.64    0.26
 -12   8   9    1.25    0.33
  -9  -7  11    0.72    0.32
  -8  -7  10   -0.20    0.23
  -7  -7   9    3.72    0.46
  -6  -7   8    2.58    0.38
   6   7  -8    1.82    0.33
  -5  -7   7    0.80    0.25
   5   7  -7    0.70    0.24
  -4  -7   6    7.79    0.46
   4   7  -6    7.37    0.33
   4   7  -6    7.55    0.47
  -3  -7   5    2.73    0.30
   3   7  -5    2.15    0.31
   3   7  -5    2.79    0.22
  -2  -7   4    2.56    0.26
   2   7  -4    2.48    0.20
   2   7  -4    2.39    0.31
  -1  -7   3   19.99    0.55
   1   7  -3   19.26    0.48
   1   7  -3   19.55    0.67
   0  -7   2    3.13    0.22
   0   7  -2    3.25    0.23
   0   7  -2    3.01    0.33
   1  -7   1    2.86    0.18
  -1   7  -1    2.76    0.22
  -1   7  -1    2.76    0.30
   2  -7   0    8.37    0.20
  -2   7   0    8.76    0.35
  -2   7   0    8.62    0.48
  -3   7   1   18.90    0.64
  -3   7   1   18.65    0.53
  -4   7   2    6.12    0.32
  -4   7   2    6.34    0.41
  -5   7   3    0.19    0.18
  -5   7   3    0.09    0.13
  -6   7   4   12.03    0.50
  -6   7   4   11.32    0.54
  -7   7   5    3.68    0.38
  -7   7   5    3.36    0.32
  -8   7   6    1.57    0.28
  -9   7   7    0.30    0.20
 -10   7   8    4.43    0.47
 -11   7   9    1.23    0.30
 -12   7  10    0.05    0.22
 -10  -6  11   -0.12    0.25
  -9  -6  10    0.62    0.29
  -8  -6   9    2.08    0.37
  -7  -6   8    0.29    0.22
  -6  -6   7    4.18    0.43
  -5  -6   6    5.17    0.40
   5   6  -6    5.42    0.28
   5   6  -6    5.69    0.43
  -4  -6   5    3.24    0.33
   4   6  -5    3.34    0.22
   4   6  -5    3.18    0.36
  -3  -6   4    3.64    0.31
   3   6  -4    3.32    0.35
   3   6  -4    3.95    0.23
  -2  -6   3    1.42    0.19
   2   6  -3    1.50    0.15
   2   6  -3    2.00    0.28
  -1  -6   2    2.48    0.22
   1   6  -2    2.26    0.27
   1   6  -2    2.78    0.20
   0  -6   1    0.77    0.12
   0   6  -1    0.71    0.22
   0   6  -1    0.66    0.12
   1  -6   0    7.04    0.22
  -1   6   0    7.20    0.40
  -1   6   0    6.76    0.27
  -2   6   1   16.13    0.44
  -2   6   1   15.87    0.55
  -3   6   2   27.86    0.63
  -3   6   2   27.89    0.74
  -4   6   3   20.65    0.64
  -4   6   3   22.03    0.58
  -5   6   4    5.55    0.34
  -5   6   4    5.37    0.37
  -6   6   5    3.74    0.36
  -6   6   5    3.97    0.30
  -6   6   5    3.87    0.19
  -7   6   6    0.79    0.23
  -8   6   7    0.95    0.25
  -9   6   8    0.80    0.23
 -10   6   9    2.53    0.37
 -11   6  10    1.03    0.30
 -12   6  11   -0.32    0.19
 -11  -5  11    1.98    0.41
 -10  -5  10    1.35    0.35
  -9  -5   9    1.09    0.30
  -8  -5   8    0.77    0.27
  -7  -5   7    0.99    0.27
  -6  -5   6    2.68    0.34
  -5  -5   5    0.15    0.18
   5   5  -5    0.36    0.12
  -4  -5   4    3.59    0.31
   4   5  -4    4.11    0.36
   4   5  -4    4.46    0.22
  -3  -5   3   30.87    0.76
   3   5  -3   29.78    0.77
   3   5  -3   30.15    0.54
  -2  -5   2    0.15    0.12
   2   5  -2    0.29    0.08
   2   5  -2    0.33    0.17
  -1  -5   1    0.36    0.11
   1   5  -1    0.31    0.16
   1   5  -1    0.50    0.09
   0  -5   0   38.87    0.66
   0   5   0   37.83    0.64
   0   5   0   39.80    0.84
   1  -5  -1    5.90    0.18
  -1   5   1    6.65    0.36
  -1   5   1    5.97    0.24
  -2   5   2    7.35    0.29
  -2   5   2    6.95    0.40
  -3   5   3    3.36    0.28
  -3   5   3    2.90    0.21
  -4   5   4    0.71    0.18
  -4   5   4    1.02    0.09
  -4   5   4    0.87    0.16
  -5   5   5    0.31    0.17
  -5   5   5    0.29    0.09
  -5   5   5    0.03    0.12
  -6   5   6    2.12    0.28
  -6   5   6    2.10    0.18
  -7   5   7   14.69    0.45
  -7   5   7   15.18    0.63
  -8   5   8    2.86    0.35
  -8   5   8    3.25    0.28
  -9   5   9    7.59    0.50
 -10   5  10    8.95    0.58
 -11   5  11    1.75    0.36
 -12   5  12    0.16    0.21
 -11  -4  10    0.89    0.33
 -10  -4   9    0.63    0.29
  -9  -4   8    1.95    0.36
  -8  -4   7    1.03    0.27
  -7  -4   6    3.42    0.38
  -6  -4   5    0.67    0.23
  -5  -4   4   14.22    0.56
  -4  -4   3    9.40    0.43
   4   4  -3    9.34    0.26
  -3  -4   2    3.32    0.26
   3   4  -2    3.58    0.16
   3   4  -2    3.49    0.28
  -2  -4   1   40.27    0.78
   2   4  -1   40.91    0.84
   2   4  -1   40.76    0.58
  -1  -4   0   55.65    0.90
   1   4   0   53.99    0.75
   1   4   0   54.51    0.99
   0  -4  -1   35.36    0.60
   0   4   1   35.98    0.75
   0   4   1   35.93    0.57
  -1   4   2    2.01    0.13
  -1   4   2    2.27    0.24
  -1   4   2    1.85    0.15
  -2   4   3   14.82    0.39
  -2   4   3   14.64    0.49
  -2   4   3   14.55    0.25
  -3   4   4   28.90    0.70
  -3   4   4   29.12    0.45
  -3   4   4   28.07    0.61
  -4   4   5    6.26    0.36
  -4   4   5    6.07    0.21
  -5   4   6    1.51    0.15
  -5   4   6    1.55    0.23
  -6   4   7    1.28    0.17
  -6   4   7    1.35    0.24
  -7   4   8    0.33    0.17
  -7   4   8    0.10    0.13
  -8   4   9    0.08    0.15
  -8   4   9   -0.05    0.14
  -9   4  10   18.95    0.77
  -9   4  10   20.27    0.67
 -10   4  11    0.42    0.22
 -11   4  12    1.69    0.36
 -12   4  13   -0.02    0.22
 -12  -3  10    4.28    0.55
 -11  -3   9   -0.12    0.23
 -10  -3   8    0.24    0.24
  -9  -3   7    0.25    0.21
  -8  -3   6    0.17    0.20
  -7  -3   5   13.75    0.61
  -6  -3   4    0.68    0.21
  -5  -3   3   64.86    1.29
  -4  -3   2   44.37    0.94
   4   3  -2   45.64    0.62
  -3  -3   1   25.01    0.61
   3   3  -1   25.89    0.63
   3   3  -1   25.47    0.36
  -2  -3   0   38.54    0.73
   2   3   0   38.69    0.77
   2   3   0   38.97    0.50
  -1  -3  -1   35.87    0.64
   1   3   1   35.76    0.50
   1   3   1   34.72    0.70
   0  -3  -2  242.92    3.09
   0   3   2  244.95    3.22
   0   3   2  251.24    2.84
  -1   3   3   -0.02    0.07
  -1   3   3    0.31    0.15
  -1   3   3    0.15    0.10
  -2   3   4    0.01    0.11
  -2   3   4    0.03    0.08
  -3   3   5   18.86    0.40
  -3   3   5   19.75    0.56
  -4   3   6    0.64    0.17
  -4   3   6    0.52    0.11
  -5   3   7   18.28    0.48
  -5   3   7   18.04    0.61
  -6   3   8   24.24    0.78
  -6   3   8   30.41    0.69
  -7   3   9    0.84    0.22
  -7   3   9    0.93    0.18
  -8   3  10   18.65    0.74
  -8   3  10   18.58    0.63
  -9   3  11   15.40    0.62
  -9   3  11   16.47    0.74
 -10   3  12    0.70    0.25
 -10   3  12    0.66    0.23
 -11   3  13    1.12    0.29
 -12   3  14    0.80    0.31
 -12  -2   9    9.21    0.68
 -11  -2   8    4.29    0.50
 -10  -2   7    4.66    0.50
  -9  -2   6    8.35    0.53
  -8  -2   5    3.19    0.37
  -7  -2   4   17.60    0.67
  -6  -2   3   52.85    1.16
  -5  -2   2   12.72    0.48
  -4  -2   1   29.06    0.69
  -3  -2   0    1.63    0.18
   3   2   0    1.76    0.20
  -2  -2  -1   38.53    0.72
   2   2   1   38.83    0.74
  -1  -2  -2  177.74    2.32
   1   2   2  174.92    2.34
   0   2   3   18.85    0.41
   0   2   3   18.97    0.48
  -1   2   4   68.32    1.12
  -1   2   4   69.20    1.03
  -2   2   5   55.99    0.88
  -2   2   5   55.29    0.99
  -3   2   6   40.60    0.73
  -3   2   6   39.68    0.84
  -4   2   7   45.89    0.86
  -4   2   7   46.36    0.98
  -5   2   8    1.87    0.21
  -5   2   8    1.69    0.25
  -6   2   9    0.79    0.18
  -6   2   9    0.98    0.21
  -7   2  10    0.14    0.16
  -7   2  10   -0.09    0.13
  -8   2  11   20.81    0.71
  -8   2  11   22.39    0.81
  -9   2  12   13.96    0.62
  -9   2  12   12.57    0.67
 -10   2  13    0.70    0.25
 -10   2  13    0.76    0.27
 -11   2  14    4.15    0.50
 -11   2  14    4.26    0.47
 -12   2  15    2.88    0.46
 -13  -1   9    4.26    0.55
 -12  -1   8   10.52    0.69
 -11  -1   7    0.29    0.25
 -10  -1   6   19.59    0.82
  -9  -1   5    5.33    0.45
  -8  -1   4    1.30    0.27
  -7  -1   3    4.31    0.37
  -6  -1   2   45.14    1.02
  -5  -1   1   83.70    1.46
  -4  -1   0    0.27    0.12
  -3  -1  -1   49.26    0.89
   3   1   1   49.15    0.86
  -2  -1  -2  147.80    2.04
  -2  -1  -2  149.97    1.66
   2   1   2  148.41    2.00
   1   1   3    4.04    0.25
   1   1   3    4.98    0.27
   0   1   4  175.18    2.37
   0   1   4  179.70    2.36
  -1   1   5  110.76    1.60
  -1   1   5  111.21    1.58
  -2   1   6    0.92    0.15
  -2   1   6    1.46    0.17
  -3   1   7  129.23    1.95
  -3   1   7  130.05    1.89
  -4   1   8   45.38    0.90
  -5   1   9   30.35    0.81
  -5   1   9   30.40    0.75
  -6   1  10   19.11    0.62
  -6   1  10   18.85    0.67
  -7   1  11   21.94    0.79
  -7   1  11   24.43    0.76
  -8   1  12   23.36    0.79
  -8   1  12   23.56    0.86
  -9   1  13    1.74    0.31
  -9   1  13    2.35    0.36
 -10   1  14    0.74    0.27
 -10   1  14    1.39    0.31
 -11   1  15    5.35    0.57
 -11   1  15    5.86    0.57
 -13   0   8    2.03    0.41
 -12   0   7   -0.04    0.23
 -11   0   6    5.23    0.46
 -10   0   5   11.62    0.61
  -9   0   4    0.26    0.19
  -8   0   3    8.50    0.48
  -7   0   2   15.51    0.59
  -6   0   1   70.70    1.34
  -5   0   0    0.44    0.15
  -4   0  -1   74.25    0.92
  -4   0  -1   73.10    1.24
  -3   0  -2   29.00    0.42
  -3   0  -2   29.39    0.63
   3   0   2   28.85    0.57
  -2   0  -3   17.25    0.30
   2   0   3   17.60    0.44
   2   0   3   17.49    0.39
   1   0   4  122.72    1.65
   1   0   4  123.16    1.75
   0   0   5    7.24    0.27
   0   0   5    7.23    0.35
  -1   0   6   37.94    0.70
  -1   0   6   37.45    0.74
  -2   0   7   11.21    0.38
  -2   0   7   11.17    0.40
  -3   0   8   93.28    1.53
  -3   0   8   97.05    1.56
  -4   0   9   77.63    1.38
  -4   0   9   78.81    1.40
  -5   0  10    1.97    0.25
  -5   0  10    1.84    0.25
  -6   0  11   18.86    0.66
  -6   0  11   18.40    0.67
  -7   0  12   18.85    0.74
  -7   0  12   19.84    0.72
  -8   0  13    1.41    0.29
  -8   0  13    1.38    0.28
  -9   0  14    2.66    0.38
  -9   0  14    2.88    0.40
 -10   0  15    8.35    0.61
 -10   0  15    8.03    0.58
 -11   0  16    0.81    0.32
 -11   0  16    1.13    0.35
 -13   1   7    1.76    0.37
 -12   1   6    0.94    0.31
 -11   1   5    9.38    0.59
 -10   1   4    8.37    0.54
  -9   1   3    1.75    0.30
  -8   1   2   21.43    0.72
  -7   1   1   22.94    0.71
  -6   1   0   32.61    0.80
  -6   1   0   32.45    0.58
  -5   1  -1   53.57    0.78
  -5   1  -1   52.20    1.03
  -4   1  -2  132.50    1.97
  -4   1  -2  133.21    1.62
  -3   1  -3    0.12    0.06
   3  -1   3    0.29    0.14
   3  -1   3   -0.07    0.08
  -2   1  -4   80.62    1.07
   2  -1   4   80.53    1.27
   2  -1   4   80.98    1.10
   1  -1   5   30.23    0.68
   1  -1   5   29.58    0.51
   0  -1   6   19.54    0.41
   0  -1   6   19.72    0.55
  -1  -1   7   16.96    0.42
  -1  -1   7   16.32    0.48
  -2  -1   8   14.62    0.43
  -2  -1   8   15.15    0.50
  -3  -1   9   60.94    1.16
  -3  -1   9   60.19    1.11
  -4  -1  10   17.81    0.58
  -4  -1  10   18.17    0.60
  -5  -1  11    1.45    0.24
  -5  -1  11    1.48    0.26
  -6  -1  12   29.26    0.87
  -6  -1  12   30.14    0.88
  -7  -1  13    7.76    0.49
  -7  -1  13    7.36    0.49
  -8  -1  14    0.00    0.18
  -8  -1  14    0.03    0.20
  -9  -1  15    3.48    0.44
  -9  -1  15    3.31    0.43
 -10  -1  16   10.34    0.69
 -10  -1  16   10.43    0.69
 -13   2   6    0.17    0.25
 -12   2   5   10.68    0.65
 -11   2   4    4.44    0.46
 -10   2   3    4.67    0.45
  -9   2   2    2.19    0.31
  -8   2   1   16.93    0.64
  -7   2   0   11.38    0.36
  -7   2   0    9.63    0.46
  -6   2  -1   10.20    0.43
  -6   2  -1   10.11    0.32
  -5   2  -2   28.41    0.69
  -5   2  -2   28.74    0.54
  -4   2  -3   53.39    0.81
   4  -2   3   53.53    1.00
  -3   2  -4    1.92    0.15
   3  -2   4    1.71    0.21
   3  -2   4    1.88    0.13
  -2   2  -5   24.66    0.49
   2  -2   5   25.10    0.63
   2  -2   5   23.90    0.39
   1  -2   6    7.01    0.19
   1  -2   6    6.82    0.38
   0  -2   7   46.73    0.73
   0  -2   7   46.04    0.93
  -1  -2   8    8.99    0.40
  -1  -2   8    8.90    0.30
  -2  -2   9   12.79    0.49
  -2  -2   9   13.77    0.43
  -3  -2  10   18.75    0.56
  -3  -2  10   18.30    0.61
  -4  -2  11    3.70    0.36
  -4  -2  11    3.69    0.30
  -5  -2  12    0.63    0.19
  -5  -2  12    0.39    0.19
  -6  -2  13   19.68    0.73
  -6  -2  13   19.12    0.75
  -7  -2  14    2.13    0.32
  -7  -2  14    3.14    0.40
  -8  -2  15    0.50    0.24
  -8  -2  15    0.30    0.23
  -9  -2  16    3.03    0.44
  -9  -2  16    2.32    0.40
 -10  -2  17    4.09    0.54
 -14   3   6    9.40    0.66
 -13   3   5    0.34    0.27
 -12   3   4   18.73    0.81
 -11   3   3    2.39    0.36
 -10   3   2    2.79    0.35
  -9   3   1   21.82    0.74
  -9   3   1   21.12    0.58
  -8   3   0    0.95    0.17
  -8   3   0    0.49    0.20
  -7   3  -1    0.46    0.19
  -7   3  -1    0.14    0.11
  -6   3  -2    0.05    0.09
  -6   3  -2    0.11    0.16
   6  -3   2   -0.24    0.15
  -5   3  -3    0.08    0.08
   5  -3   3   -0.02    0.16
  -4   3  -4   20.81    0.47
   4  -3   4   20.08    0.57
  -3   3  -5   19.62    0.46
   3  -3   5   20.35    0.61
  -2   3  -6  118.03    1.60
   2  -3   6  116.39    1.86
   1  -3   7   71.57    1.31
   1  -3   7   72.47    0.96
   0  -3   8   12.85    0.31
   0  -3   8   13.28    0.49
  -1  -3   9   10.87    0.34
  -1  -3   9   11.03    0.46
  -2  -3  10   22.84    0.70
  -2  -3  10   22.03    0.57
  -3  -3  11    0.83    0.24
  -3  -3  11    0.76    0.16
  -4  -3  12    1.20    0.25
  -4  -3  12    1.38    0.23
  -5  -3  13    0.04    0.15
  -5  -3  13    0.11    0.20
  -6  -3  14    0.89    0.24
  -6  -3  14    1.09    0.29
  -7  -3  15    0.87    0.28
  -7  -3  15    0.54    0.24
  -8  -3  16   -0.04    0.24
  -9  -3  17    0.13    0.26
 -14   4   5    0.25    0.29
 -13   4   4    5.24    0.53
 -12   4   3    6.22    0.51
 -11   4   2    1.40    0.30
 -10   4   1    9.39    0.53
  -9   4   0    0.57    0.22
  -9   4   0    0.56    0.16
  -8   4  -1    0.03    0.11
  -8   4  -1    0.04    0.19
   8  -4   1    0.07    0.22
  -7   4  -2    0.89    0.16
   7  -4   2    0.71    0.23
  -6   4  -3    3.63    0.24
   6  -4   3    3.43    0.33
  -5   4  -4    2.18    0.20
   5  -4   4    1.85    0.25
  -4   4  -5    3.68    0.22
   4  -4   5    3.00    0.31
  -3   4  -6   11.13    0.37
   3  -4   6   10.72    0.54
  -2   4  -7    9.23    0.35
   2  -4   7    9.72    0.53
  -1   4  -8   -0.02    0.10
   1  -4   8    0.25    0.21
   0  -4   9    3.40    0.33
  -1  -4  10    5.98    0.40
  -1  -4  10    5.19    0.25
  -2  -4  11   10.67    0.51
  -2  -4  11   11.19    0.41
  -3  -4  12   22.10    0.64
  -3  -4  12   22.08    0.76
  -4  -4  13    1.32    0.27
  -4  -4  13    1.58    0.25
  -5  -4  14    1.39    0.30
  -6  -4  15    0.29    0.25
  -7  -4  16    0.02    0.21
  -8  -4  17    0.20    0.25
  -9  -4  18    0.00    0.26
 -14   5   4    1.77    0.39
 -13   5   3    0.11    0.28
 -12   5   2   -0.09    0.24
 -11   5   1    3.76    0.42
 -11   5   1    4.75    0.38
 -10   5   0    5.67    0.37
 -10   5   0    4.96    0.43
  10  -5   0    5.06    0.43
  -9   5  -1    2.33    0.25
   9  -5   1    2.77    0.34
  -8   5  -2    6.16    0.35
   8  -5   2    5.81    0.44
  -7   5  -3   19.13    0.55
   7  -5   3   19.75    0.67
  -6   5  -4    7.72    0.36
   6  -5   4    7.10    0.47
  -5   5  -5    0.52    0.14
   5  -5   5    0.23    0.23
  -4   5  -6   10.80    0.40
   4  -5   6    9.91    0.56
  -3   5  -7    7.90    0.35
   3  -5   7    8.37    0.50
  -2   5  -8    1.37    0.19
   2  -5   8    1.67    0.31
  -1   5  -9    0.61    0.15
   1  -5   9    0.45    0.23
   0   5 -10    2.91    0.28
   0  -5  10    2.98    0.33
  -1  -5  11    0.87    0.24
  -2  -5  12    6.44    0.45
  -3  -5  13    1.01    0.26
  -4  -5  14    0.66    0.25
  -5  -5  15    4.77    0.48
  -6  -5  16    2.23    0.38
  -7  -5  17   -0.11    0.23
  -8  -5  18    0.31    0.27
  13  -6  -2    1.78    0.37
  12  -6  -1    0.40    0.26
 -11   6   0    0.21    0.17
  11  -6   0    0.15    0.23
 -10   6  -1    0.03    0.13
  10  -6   1    0.25    0.25
  -9   6  -2    1.47    0.21
  -9   6  -2    1.39    0.22
   9  -6   2    1.26    0.29
  -8   6  -3    8.68    0.42
  -8   6  -3    8.36    0.35
   8  -6   3    9.31    0.52
  -7   6  -4    1.46    0.21
  -7   6  -4    1.72    0.17
   7  -6   4    1.39    0.31
  -6   6  -5    6.88    0.35
   6  -6   5    6.96    0.53
  -5   6  -6    0.11    0.13
   5  -6   6   -0.12    0.30
  -4   6  -7    0.97    0.18
   4  -6   7    0.71    0.34
  -3   6  -8    1.89    0.22
   3  -6   8    1.34    0.36
  -2   6  -9    0.16    0.14
   2  -6   9    0.39    0.28
  -1   6 -10    0.31    0.16
  -1   6 -10    0.07    0.09
   1  -6  10    0.23    0.23
   0   6 -11    4.12    0.34
   0  -6  11    4.44    0.42
   1   6 -12    0.27    0.17
  -1  -6  12   -0.15    0.21
  -2  -6  13    1.45    0.30
  -3  -6  14   -0.08    0.18
  -4  -6  15    1.22    0.31
  -5  -6  16    4.70    0.52
  -6  -6  17    7.79    0.60
  -7  -6  18    0.96    0.35
 -12   7   0    7.23    0.48
  12  -7   0    8.11    0.55
 -11   7  -1    0.08    0.16
  11  -7   1    0.45    0.26
 -10   7  -2    8.96    0.47
  10  -7   2    9.45    0.56
  -9   7  -3    2.71    0.29
   9  -7   3    2.29    0.34
  -8   7  -4    0.12    0.14
   8  -7   4   -0.04    0.25
  -7   7  -5    8.84    0.44
   7  -7   5    8.77    0.58
  -6   7  -6   20.05    0.64
   6  -7   6   21.80    0.83
  -5   7  -7    0.43    0.17
   5  -7   7    0.35    0.35
  -4   7  -8   17.68    0.59
   4  -7   8   18.16    0.77
  -3   7  -9    1.00    0.21
   3  -7   9    1.46    0.35
  -2   7 -10   17.22    0.59
   2  -7  10   17.62    0.70
  -1   7 -11   10.47    0.49
   1  -7  11   10.22    0.57
   0   7 -12   16.77    0.61
   0  -7  12   16.52    0.68
   1   7 -13   21.15    0.71
  -1  -7  13   22.09    0.82
   2   7 -14    5.09    0.41
  -2  -7  14    4.31    0.46
   3   7 -15    3.00    0.35
  -3  -7  15    4.32    0.46
  -4  -7  16    0.84    0.28
  -5  -7  17   -0.16    0.24
  -6  -7  18    5.19    0.59
  -7  -7  19    2.66    0.47
 -13   8   0    5.86    0.47
 -12   8  -1    2.61    0.35
 -11   8  -2    2.99    0.34
  11  -8   2    3.46    0.42
 -10   8  -3    4.49    0.39
  10  -8   3    4.42    0.45
  -9   8  -4    6.44    0.42
   9  -8   4    7.02    0.53
  -8   8  -5    1.09    0.22
   8  -8   5    0.93    0.35
  -7   8  -6    6.21    0.38
   7  -8   6    5.47    0.53
  -6   8  -7   16.52    0.60
   6  -8   7   17.52    0.78
  -5   8  -8    3.11    0.31
   5  -8   8    2.27    0.43
  -4   8  -9    3.98    0.35
   4  -8   9    5.60    0.51
  -3   8 -10    1.51    0.25
   3  -8  10    0.98    0.31
  -2   8 -11   12.75    0.55
   2  -8  11   12.36    0.63
  -1   8 -12    8.00    0.46
   1  -8  12    7.72    0.51
   0   8 -13   14.27    0.60
   0  -8  13   14.35    0.65
   1   8 -14    7.47    0.48
  -1  -8  14    7.39    0.52
   2   8 -15   -0.22    0.16
  -2  -8  15   -0.19    0.22
   3   8 -16   12.00    0.62
  -3  -8  16   11.77    0.70
   4   8 -17    2.90    0.38
  -4  -8  17    3.47    0.49
   5   8 -18    3.73    0.43
  -5  -8  18    4.28    0.54
   6   8 -19    1.08    0.30
  -6  -8  19    0.94    0.37
 -13   9  -1    4.84    0.47
 -12   9  -2    3.37    0.38
 -11   9  -3    7.26    0.48
 -10   9  -4    7.68    0.48
  10  -9   4    7.65    0.60
  -9   9  -5    1.65    0.27
   9  -9   5    2.42    0.43
  -8   9  -6   13.32    0.58
   8  -9   6   12.45    0.71
  -7   9  -7    1.50    0.25
   7  -9   7    1.80    0.40
  -6   9  -8    0.07    0.15
   6  -9   8   -0.33    0.34
  -5   9  -9   12.13    0.55
   5  -9   9   11.31    0.66
  -4   9 -10   12.01    0.54
   4  -9  10   13.77    0.66
  -3   9 -11    8.57    0.48
   3  -9  11    9.61    0.58
  -2   9 -12    0.56    0.19
   2  -9  12    0.96    0.30
  -1   9 -13    4.87    0.39
   1  -9  13    4.74    0.46
   0   9 -14   25.66    0.84
   0  -9  14   24.78    0.93
   1   9 -15    1.87    0.30
  -1  -9  15    1.66    0.34
   2   9 -16   17.53    0.74
  -2  -9  16   18.93    0.86
   3   9 -17    7.75    0.54
  -3  -9  17    8.43    0.64
   4   9 -18   -0.04    0.21
  -4  -9  18   -0.03    0.27
   5   9 -19    0.52    0.27
  -5  -9  19    0.50    0.32
 -13  10  -2    3.54    0.43
 -12  10  -3    1.96    0.35
 -10  10  -5    1.90    0.30
  -9  10  -6    0.00    0.16
   9 -10   6   -0.07    0.33
  -8  10  -7   14.09    0.63
   8 -10   7   13.40    0.77
  -7  10  -8    2.95    0.35
   7 -10   8    2.31    0.47
  -6  10  -9    4.92    0.42
   6 -10   9    4.88    0.51
  -5  10 -10    6.63    0.46
   5 -10  10    5.93    0.53
  -4  10 -11   11.89    0.58
   4 -10  11   11.11    0.64
  -3  10 -12    5.08    0.41
   3 -10  12    4.65    0.48
  -2  10 -13    4.65    0.44
   2 -10  13    5.70    0.50
  -1  10 -14   22.33    0.81
   1 -10  14   21.01    0.86
   0  10 -15    4.20    0.43
   0 -10  15    4.85    0.51
   1  10 -16    0.52    0.24
  -1 -10  16    0.59    0.30
   2  10 -17    2.82    0.38
  -2 -10  17    3.34    0.48
   3  10 -18    4.65    0.48
  -3 -10  18    5.21    0.59
   4  10 -19   -0.17    0.22
  -4 -10  19    0.32    0.31
 -13  11  -3    0.30    0.24
 -12  11  -4    0.13    0.21
 -11  11  -5    5.98    0.53
 -10  11  -6    0.30    0.22
  -9  11  -7   12.69    0.62
  -8  11  -8   18.51    0.76
  -7  11  -9    0.02    0.18
   7 -11   9   -0.50    0.33
  -6  11 -10   10.18    0.55
   6 -11  10   10.12    0.67
  -5  11 -11   20.79    0.78
   5 -11  11   20.66    0.83
  -4  11 -12   10.04    0.56
   4 -11  12    9.57    0.64
  -3  11 -13    0.09    0.19
   3 -11  13    0.35    0.29
  -2  11 -14    0.97    0.26
   2 -11  14    0.80    0.31
  -1  11 -15    1.94    0.33
   1 -11  15    2.42    0.41
   0  11 -16    0.32    0.22
   0 -11  16   -0.26    0.24
   1  11 -17    2.26    0.37
  -1 -11  17    2.69    0.45
   2  11 -18    5.09    0.52
  -2 -11  18    3.57    0.51
 -12  12  -5    1.47    0.32
 -11  12  -6    1.08    0.30
 -10  12  -7    6.93    0.53
  -9  12  -8   10.53    0.61
  -8  12  -9    5.77    0.52
  -7  12 -10    0.12    0.21
  -6  12 -11    4.29    0.44
   6 -12  11    4.06    0.50
  -5  12 -12    5.13    0.48
   5 -12  12    3.96    0.49
  -4  12 -13    8.80    0.56
   4 -12  13    9.50    0.63
  -3  12 -14    0.06    0.20
   3 -12  14   -0.11    0.26
  -2  12 -15   13.86    0.71
   2 -12  15   14.26    0.77
  -1  12 -16    2.99    0.42
   1 -12  16    3.19    0.48
   0  12 -17    1.78    0.34
   0 -12  17    2.07    0.43
   1  12 -18    3.47    0.45
  -1 -12  18    3.08    0.51
 -11  13  -7    0.10    0.24
 -10  13  -8    6.81    0.59
  -9  13  -9    8.30    0.59
  -8  13 -10   -0.02    0.23
  -7  13 -11    6.28    0.56
  -6  13 -12    1.31    0.32
  -5  13 -13    2.35    0.38
  -4  13 -14    0.56    0.27
   4 -13  14    0.33    0.31
  -3  13 -15    4.11    0.48
   3 -13  15    4.49    0.54
  -2  13 -16    1.78    0.35
   2 -13  16    1.69    0.42
  -1  13 -17    0.82    0.31
   1 -13  17    0.74    0.35
  -9  14 -10    1.30    0.32
  -8  14 -11    3.09    0.45
  -7  14 -12    2.86    0.43
  -6  14 -13   -0.17    0.21
  -5  14 -14    0.94    0.31
  -4  14 -15    1.14    0.32
  -3  14 -16    7.44    0.65
   3 -14  16    7.66    0.66
  -2  16  -8    1.17    0.31
  -3  16  -7    3.32    0.42
  -4  16  -6    5.59    0.52
  -5  16  -5    2.23    0.38
  -6  16  -4    0.73    0.31
  -7  16  -3    3.56    0.46
  -1  15  -8    0.28    0.24
  -2  15  -7    1.97    0.33
  -3  15  -6    7.13    0.52
  -4  15  -5    3.12    0.40
  -5  15  -4    0.02    0.22
  -6  15  -3    0.45    0.26
  -7  15  -2    0.82    0.29
  -8  15  -1    2.10    0.37
  -9  15   0    0.93    0.30
   2  14 -10    0.09    0.36
   1  14  -9    4.30    0.56
   0  14  -8    3.01    0.52
  -1  14  -7    0.85    0.26
  -1  14  -7    0.82    0.39
  -2  14  -6    4.27    0.42
  -2  14  -6    3.18    0.50
  -3  14  -5    4.70    0.56
  -3  14  -5    5.05    0.45
  -4  14  -4    3.48    0.47
  -4  14  -4    4.46    0.43
  -5  14  -3    3.96    0.42
  -5  14  -3    2.94    0.44
  -6  14  -2    5.81    0.55
  -6  14  -2    6.70    0.51
  -7  14  -1    1.96    0.34
  -8  14   0    0.13    0.22
  -9  14   1    0.24    0.24
 -10  14   2    0.04    0.24
  -4 -13  11    0.13    0.27
   4  13 -11    0.13    0.34
   3  13 -10   -0.38    0.31
   2  13  -9    1.21    0.43
   1  13  -8   -0.36    0.29
   0  13  -7    1.67    0.42
   0  13  -7    1.19    0.25
  -1  13  -6    5.00    0.42
  -1  13  -6    3.80    0.51
  -2  13  -5    3.43    0.37
  -2  13  -5    4.28    0.51
  -3  13  -4    0.21    0.19
  -3  13  -4   -0.06    0.29
  -4  13  -3    3.01    0.43
  -4  13  -3    2.48    0.33
  -5  13  -2    4.18    0.47
  -5  13  -2    4.33    0.42
  -6  13  -1   -0.32    0.21
  -6  13  -1   -0.24    0.15
  -7  13   0   -0.12    0.22
  -7  13   0    0.18    0.20
  -8  13   1    0.49    0.24
  -8  13   1    0.10    0.24
  -9  13   2    0.07    0.26
  -9  13   2    0.24    0.21
 -10  13   3    0.38    0.25
 -10  13   3    0.35    0.26
 -11  13   4    0.47    0.27
 -11  13   4    0.60    0.32
  -5 -12  11    0.08    0.26
   5  12 -11    0.42    0.35
  -4 -12  10    0.62    0.26
   4  12 -10    0.51    0.34
  -3 -12   9    0.47    0.25
   3  12  -9    0.29    0.32
  -2 -12   8    2.20    0.34
   2  12  -8    2.64    0.43
   1  12  -7    2.29    0.42
   1  12  -7    2.60    0.31
   0  12  -6    1.65    0.38
   0  12  -6    1.75    0.27
  -1  12  -5    4.05    0.48
  -1  12  -5    3.79    0.35
  -2  12  -4    2.12    0.29
  -2  12  -4    1.72    0.39
  -3  12  -3    2.90    0.43
  -3  12  -3    2.68    0.31
  -4  12  -2    1.99    0.37
  -4  12  -2    1.69    0.27
  -5  12  -1    7.16    0.47
  -5  12  -1    7.21    0.53
  -6  12   0    1.07    0.29
  -6  12   0    0.77    0.24
  -7  12   1    0.09    0.19
  -7  12   1   -0.20    0.20
  -8  12   2    4.66    0.48
  -8  12   2    5.29    0.43
  -9  12   3    1.94    0.33
  -9  12   3    2.28    0.37
 -10  12   4    4.98    0.49
 -10  12   4    5.52    0.55
 -11  12   5    0.08    0.25
  -6 -11  11    1.39    0.35
   6  11 -11    2.05    0.45
  -5 -11  10    0.79    0.31
   5  11 -10    0.94    0.36
  -4 -11   9    0.29    0.26
   4  11  -9    0.85    0.33
  -3 -11   8    0.45    0.23
   3  11  -8    0.12    0.29
  -2 -11   7    1.78    0.30
   2  11  -7    1.53    0.37
  -1 -11   6    1.14    0.23
   1  11  -6    1.27    0.22
   1  11  -6    0.98    0.34
   0  11  -5   11.53    0.49
   0  11  -5   11.47    0.65
  -1  11  -4   -0.14    0.27
  -1  11  -4    0.24    0.16
  -2  11  -3   22.22    0.69
  -2  11  -3   22.68    0.85
  -3  11  -2    1.62    0.35
  -3  11  -2    2.06    0.27
  -4  11  -1    0.27    0.25
  -4  11  -1    0.29    0.18
  -5  11   0   14.72    0.60
  -5  11   0   14.67    0.68
  -6  11   1    0.16    0.23
  -6  11   1    0.31    0.17
  -7  11   2    0.38    0.24
  -7  11   2    0.37    0.20
  -8  11   3    8.32    0.55
  -8  11   3    8.70    0.53
  -9  11   4    1.17    0.28
  -9  11   4    1.06    0.30
 -10  11   5    1.37    0.31
 -10  11   5    1.96    0.37
 -11  11   6    0.04    0.22
 -12  11   7    4.84    0.54
  -7 -10  11    0.53    0.30
   7  10 -11    1.37    0.38
  -6 -10  10    0.97    0.32
   6  10 -10    0.67    0.34
  -5 -10   9    3.88    0.46
   5  10  -9    3.05    0.44
  -4 -10   8   12.84    0.66
   4  10  -8   13.46    0.71
  -3 -10   7    0.15    0.21
   3  10  -7    0.12    0.27
  -2 -10   6   13.78    0.59
   2  10  -6   13.19    0.49
   2  10  -6   12.98    0.67
  -1 -10   5   11.68    0.50
   1  10  -5   12.28    0.62
   1  10  -5   11.21    0.46
   0 -10   4    3.64    0.29
   0  10  -4    3.68    0.30
   0  10  -4    4.21    0.45
  -1  10  -3   39.44    1.09
  -1  10  -3   39.83    0.89
  -2  10  -2   18.62    0.60
  -2  10  -2   19.31    0.77
  -3  10  -1   -0.02    0.14
  -3  10  -1   -0.23    0.24
  -4  10   0   10.60    0.58
  -4  10   0   10.96    0.49
  -5  10   1    5.35    0.38
  -5  10   1    4.97    0.41
  -6  10   2    3.90    0.35
  -6  10   2    4.15    0.42
  -7  10   3   12.54    0.58
  -7  10   3   12.82    0.63
  -8  10   4    2.63    0.37
  -8  10   4    2.61    0.34
  -9  10   5   11.34    0.60
  -9  10   5   10.94    0.62
 -10  10   6    1.83    0.36
 -11  10   7    1.92    0.35
 -12  10   8    4.62    0.53
  -8  -9  11    1.03    0.35
   8   9 -11    0.39    0.32
  -7  -9  10    0.82    0.33
   7   9 -10    0.78    0.32
  -6  -9   9   14.05    0.74
   6   9  -9   12.14    0.72
  -5  -9   8    9.62    0.58
   5   9  -8   11.26    0.66
  -4  -9   7    0.42    0.23
   4   9  -7    0.33    0.28
  -3  -9   6    9.32    0.50
   3   9  -6    8.51    0.54
   3   9  -6    9.07    0.40
  -2  -9   5    8.80    0.45
   2   9  -5    9.12    0.57
   2   9  -5    9.40    0.38
  -1  -9   4    0.00    0.14
   1   9  -4    0.07    0.12
   1   9  -4   -0.03    0.24
   0  -9   3    0.04    0.12
   0   9  -3   -0.01    0.25
   0   9  -3   -0.02    0.13
   1  -9   2    2.82    0.21
  -1   9  -2    3.22    0.39
  -1   9  -2    2.46    0.24
  -2   9  -1   29.69    0.92
  -2   9  -1   29.25    0.72
  -3   9   0    0.58    0.16
  -3   9   0    0.57    0.28
  -4   9   1   23.56    0.79
  -4   9   1   26.04    0.71
  -5   9   2   26.12    0.75
  -5   9   2   27.24    0.85
  -6   9   3    6.47    0.46
  -6   9   3    6.46    0.39
  -7   9   4    7.73    0.49
  -7   9   4    7.86    0.46
  -8   9   5   15.06    0.64
  -8   9   5   15.28    0.70
  -9   9   6    2.50    0.37
 -10   9   7    0.61    0.27
 -11   9   8    1.93    0.35
 -12   9   9    2.70    0.43
  -9  -8  11    3.49    0.51
   9   8 -11    4.40    0.54
  -8  -8  10    1.60    0.38
   8   8 -10    1.35    0.37
  -7  -8   9    3.98    0.48
   7   8  -9    3.64    0.46
  -6  -8   8   20.36    0.84
   6   8  -8   21.40    0.87
  -5  -8   7    0.47    0.22
   5   8  -7    0.41    0.27
  -4  -8   6    6.06    0.44
   4   8  -6    6.27    0.50
  -3  -8   5    5.86    0.40
   3   8  -5    7.07    0.32
   3   8  -5    6.06    0.49
  -2  -8   4    0.79    0.20
   2   8  -4    0.41    0.28
   2   8  -4    0.83    0.15
  -1  -8   3    0.26    0.14
   1   8  -3    0.38    0.27
   1   8  -3    0.11    0.12
   0  -8   2   17.82    0.49
   0   8  -2   17.87    0.69
   0   8  -2   17.08    0.49
   1  -8   1   33.80    0.64
  -1   8  -1   34.91    0.73
  -1   8  -1   34.39    0.92
   2  -8   0    1.17    0.11
  -2   8   0    1.28    0.19
  -2   8   0    1.45    0.31
  -3   8   1   30.72    0.86
  -3   8   1   29.91    0.71
  -4   8   2   25.24    0.78
  -4   8   2   25.30    0.68
  -5   8   3   35.79    0.97
  -5   8   3   35.51    0.85
  -6   8   4    0.68    0.22
  -6   8   4    0.66    0.19
  -7   8   5    0.73    0.23
  -7   8   5    0.51    0.18
  -8   8   6   14.39    0.68
  -9   8   7    2.95    0.39
 -10   8   8   15.09    0.74
 -11   8   9    5.18    0.53
 -12   8  10    2.05    0.37
  -9  -7  10    1.71    0.38
   9   7 -10    1.45    0.37
  -8  -7   9    4.03    0.49
   8   7  -9    3.96    0.51
  -7  -7   8   10.07    0.63
   7   7  -8   10.91    0.64
  -6  -7   7    2.03    0.35
   6   7  -7    1.79    0.33
  -5  -7   6    0.16    0.20
   5   7  -6   -0.04    0.22
  -4  -7   5    1.17    0.25
   4   7  -5    0.92    0.15
   4   7  -5    0.78    0.27
  -3  -7   4    5.55    0.37
   3   7  -4    5.74    0.27
   3   7  -4    5.07    0.45
  -2  -7   3    0.22    0.14
   2   7  -3    0.27    0.24
   2   7  -3    0.29    0.11
  -1  -7   2    8.25    0.35
   1   7  -2    7.85    0.47
   1   7  -2    8.19    0.31
   0  -7   1   46.14    0.83
   0   7  -1   44.79    1.03
   0   7  -1   45.57    0.81
   1  -7   0   20.60    0.42
  -1   7   0   19.49    0.50
  -1   7   0   20.44    0.69
  -2   7   1   13.57    0.43
  -2   7   1   12.43    0.57
  -3   7   2   10.73    0.53
  -3   7   2   10.18    0.40
  -4   7   3    6.23    0.34
  -4   7   3    5.48    0.42
  -5   7   4    4.35    0.30
  -5   7   4    4.94    0.41
  -6   7   5    0.15    0.19
  -6   7   5    0.37    0.17
  -7   7   6    2.90    0.35
  -8   7   7    8.88    0.55
  -9   7   8    0.34    0.22
 -10   7   9    9.72    0.60
 -11   7  10    3.18    0.43
 -12   7  11   -0.01    0.21
 -10  -6  10    2.47    0.44
  -9  -6   9    0.77    0.30
  -8  -6   8   11.38    0.66
  -7  -6   7    3.48    0.42
  -6  -6   6    0.04    0.18
   6   6  -6   -0.13    0.21
  -5  -6   5    6.83    0.44
   5   6  -5    7.08    0.47
  -4  -6   4   10.95    0.51
   4   6  -4   11.91    0.56
   4   6  -4   11.30    0.33
  -3  -6   3    7.02    0.37
   3   6  -3    6.89    0.26
   3   6  -3    7.05    0.47
  -2  -6   2   10.04    0.40
   2   6  -2   11.00    0.52
   2   6  -2    9.99    0.30
  -1  -6   1   45.50    0.85
   1   6  -1   45.32    0.98
   1   6  -1   44.34    0.73
   0  -6   0   83.28    1.26
   0   6   0   85.97    1.49
   0   6   0   84.82    1.20
   1  -6  -1    1.22    0.11
  -1   6   1    1.26    0.26
  -1   6   1    1.00    0.14
  -2   6   2   43.02    0.80
  -2   6   2   42.60    0.97
  -3   6   3    6.48    0.40
  -3   6   3    6.24    0.31
  -4   6   4    0.44    0.20
  -4   6   4    0.23    0.13
  -5   6   5    0.10    0.18
  -5   6   5    0.01    0.13
  -6   6   6    4.42    0.40
  -7   6   7    0.06    0.16
  -8   6   8   12.59    0.64
  -9   6   9    6.28    0.48
 -10   6  10   10.05    0.61
 -11   6  11    3.28    0.44
 -12   6  12    2.53    0.42
 -11  -5  10    3.37    0.50
 -10  -5   9    0.47    0.28
  -9  -5   8    4.64    0.51
  -8  -5   7    9.24    0.60
  -7  -5   6    6.43    0.49
  -6  -5   5    0.50    0.22
  -5  -5   4    4.04    0.36
   5   5  -4    4.60    0.40
  -4  -5   3   10.17    0.47
   4   5  -3    9.82    0.27
   4   5  -3   10.03    0.48
  -3  -5   2   11.78    0.45
   3   5  -2   10.92    0.27
   3   5  -2   11.35    0.51
  -2  -5   1   62.60    1.11
   2   5  -1   62.10    0.87
   2   5  -1   64.89    1.20
  -1  -5   0   76.04    1.20
   1   5   0   74.07    1.32
   1   5   0   77.61    1.03
   0  -5  -1    0.69    0.11
   0   5   1    0.71    0.21
   0   5   1    0.59    0.10
  -1   5   2    1.63    0.25
  -1   5   2    1.90    0.14
  -1   5   2    1.63    0.15
  -2   5   3    1.90    0.26
  -2   5   3    1.52    0.16
  -3   5   4    7.47    0.33
  -3   5   4    7.30    0.41
  -4   5   5    1.19    0.10
  -4   5   5    0.97    0.20
  -5   5   6   10.34    0.48
  -5   5   6   10.48    0.30
  -6   5   7   42.01    0.78
  -6   5   7   41.77    1.05
  -7   5   8   11.54    0.56
  -7   5   8   11.10    0.40
  -8   5   9   11.27    0.58
  -9   5  10   14.21    0.69
 -10   5  11    6.40    0.50
 -11   5  12    0.19    0.23
 -12   5  13    7.12    0.61
 -11  -4   9    2.62    0.44
 -10  -4   8    1.99    0.37
  -9  -4   7    5.86    0.51
  -8  -4   6   18.89    0.78
  -7  -4   5    2.43    0.33
  -6  -4   4   49.46    1.18
  -5  -4   3   50.89    1.13
   5   4  -3   49.68    0.71
  -4  -4   2    0.12    0.14
   4   4  -2    0.16    0.17
   4   4  -2    0.23    0.07
  -3  -4   1   14.42    0.47
   3   4  -1   14.46    0.51
   3   4  -1   13.43    0.25
  -2  -4   0    1.88    0.19
   2   4   0    2.19    0.11
   2   4   0    1.44    0.21
  -1  -4  -1   17.23    0.43
   1   4   1   17.00    0.33
   1   4   1   17.43    0.54
   0  -4  -2   29.72    0.54
   0   4   2   29.90    0.70
   0   4   2   31.14    0.53
  -1   4   3  112.69    1.47
  -1   4   3  107.96    1.72
  -1   4   3  109.31    1.46
  -2   4   4   15.04    0.32
  -2   4   4   15.31    0.53
  -3   4   5    8.10    0.39
  -3   4   5    7.67    0.22
  -4   4   6   32.26    0.59
  -4   4   6   31.96    0.81
  -5   4   7   44.27    1.03
  -5   4   7   43.17    0.79
  -6   4   8    2.97    0.33
  -6   4   8    3.27    0.25
  -7   4   9    1.57    0.28
  -7   4   9    1.41    0.20
  -8   4  10   11.99    0.50
  -8   4  10   13.38    0.64
  -9   4  11    3.84    0.43
 -10   4  12    7.20    0.55
 -11   4  13    1.53    0.35
 -12   4  14    6.34    0.65
 -12  -3   9    2.98    0.48
 -11  -3   8    0.30    0.27
 -10  -3   7    1.09    0.32
  -9  -3   6   10.31    0.62
  -8  -3   5    8.79    0.54
  -7  -3   4   18.63    0.71
  -6  -3   3   12.26    0.55
  -5  -3   2    7.80    0.42
   5   3  -2    8.32    0.20
  -4  -3   1    1.46    0.21
   4   3  -1    1.43    0.23
  -3  -3   0   34.79    0.76
   3   3   0   34.66    0.78
  -2  -3  -1   25.07    0.57
   2   3   1   25.18    0.62
  -1  -3  -2  256.99    3.31
   1   3   2  255.31    3.37
   0   3   3   67.67    1.00
   0   3   3   66.91    1.15
  -1   3   4  166.96    2.37
  -1   3   4  165.73    2.20
  -2   3   5   47.67    0.76
  -2   3   5   45.82    0.93
  -3   3   6    1.69    0.16
  -3   3   6    1.67    0.22
  -4   3   7   94.99    1.43
  -4   3   7   96.45    1.65
  -5   3   8    5.12    0.36
  -5   3   8    6.02    0.30
  -6   3   9    3.30    0.35
  -6   3   9    3.24    0.27
  -7   3  10    0.25    0.18
  -7   3  10   -0.05    0.13
  -8   3  11    9.10    0.53
  -8   3  11    9.29    0.47
  -9   3  12    0.72    0.24
  -9   3  12    0.64    0.22
 -10   3  13   -0.08    0.20
 -11   3  14    4.74    0.53
 -12  -2   8    0.21    0.28
 -11  -2   7   15.50    0.81
 -10  -2   6    3.98    0.46
  -9  -2   5    6.90    0.51
  -8  -2   4    0.19    0.20
  -7  -2   3    8.46    0.49
  -6  -2   2    2.17    0.29
  -5  -2   1    5.41    0.34
  -4  -2   0    6.81    0.33
  -3  -2  -1   18.94    0.51
   3   2   1   19.22    0.53
  -2  -2  -2    4.99    0.25
   2   2   2    4.52    0.29
   1   2   3  135.13    1.91
   1   2   3  136.33    1.87
   0   2   4  171.76    2.30
   0   2   4  173.37    2.38
  -1   2   5   43.08    0.84
  -1   2   5   41.22    0.76
  -2   2   6    0.43    0.14
  -2   2   6    0.18    0.13
  -3   2   7   30.46    0.74
  -3   2   7   30.26    0.64
  -4   2   8    0.18    0.14
  -4   2   8    0.36    0.14
  -5   2   9    2.10    0.27
  -5   2   9    2.14    0.23
  -6   2  10    0.00    0.13
  -6   2  10    0.05    0.14
  -7   2  11    6.38    0.39
  -7   2  11    6.17    0.43
  -8   2  12   -0.01    0.18
  -8   2  12   -0.02    0.16
  -9   2  13    0.15    0.20
  -9   2  13    0.34    0.21
 -10   2  14   -0.13    0.20
 -10   2  14   -0.20    0.16
 -11   2  15    0.37    0.24
 -13  -1   8    0.55    0.29
 -12  -1   7    2.63    0.44
 -11  -1   6    0.57    0.27
 -10  -1   5    1.13    0.28
  -9  -1   4    9.33    0.54
  -8  -1   3    3.57    0.37
  -7  -1   2   11.56    0.53
  -6  -1   1    2.38    0.28
  -5  -1   0    2.14    0.25
  -4  -1  -1    5.13    0.31
  -3  -1  -2    2.78    0.22
   3   1   2    2.79    0.23
   2   1   3   29.80    0.63
   2   1   3   30.28    0.61
   1   1   4  102.69    1.50
   1   1   4  105.02    1.52
   0   1   5   16.35    0.45
   0   1   5   16.52    0.48
  -1   1   6    1.92    0.21
  -1   1   6    1.64    0.18
  -2   1   7    0.91    0.17
  -2   1   7    0.72    0.15
  -3   1   8   -0.06    0.12
  -3   1   8   -0.08    0.10
  -4   1   9   14.68    0.54
  -4   1   9   13.75    0.48
  -5   1  10    6.67    0.39
  -5   1  10    6.53    0.38
  -6   1  11    3.00    0.31
  -6   1  11    3.05    0.34
  -7   1  12    1.84    0.29
  -7   1  12    1.27    0.25
  -8   1  13    0.48    0.23
  -8   1  13    0.42    0.22
  -9   1  14    3.68    0.41
  -9   1  14    2.15    0.36
 -10   1  15    0.46    0.27
 -10   1  15    0.91    0.28
 -11   1  16    0.71    0.30
 -11   1  16    0.12    0.23
 -13   0   7    0.76    0.32
 -12   0   6    1.21    0.32
 -11   0   5    0.09    0.21
 -10   0   4    2.33    0.36
  -9   0   3    5.10    0.44
  -8   0   2   33.35    0.96
  -7   0   1    8.74    0.46
  -6   0   0   13.24    0.51
  -5   0  -1    2.53    0.25
  -5   0  -1    2.84    0.13
  -4   0  -2   21.08    0.57
  -4   0  -2   21.21    0.35
  -3   0  -3   43.88    0.60
  -3   0  -3   43.93    0.85
   3   0   3   43.47    0.83
   3   0   3   43.17    0.76
   2   0   4   25.40    0.58
   2   0   4   25.20    0.51
   1   0   5    1.13    0.16
   1   0   5    1.28    0.21
   0   0   6    2.08    0.24
   0   0   6    2.44    0.20
  -1   0   7   31.49    0.65
  -1   0   7   31.46    0.71
  -2   0   8   26.99    0.65
  -2   0   8   26.33    0.63
  -3   0   9   57.00    1.10
  -4   0  10   24.73    0.70
  -4   0  10   22.87    0.68
  -5   0  11    0.83    0.20
  -5   0  11    0.93    0.22
  -6   0  12   20.32    0.71
  -6   0  12   20.11    0.72
  -7   0  13    3.98    0.41
  -7   0  13    5.39    0.42
  -8   0  14    1.71    0.32
  -8   0  14    2.30    0.36
  -9   0  15    0.67    0.26
  -9   0  15    0.62    0.25
 -10   0  16    6.17    0.60
 -10   0  16    5.41    0.55
 -13   1   6    1.60    0.36
 -12   1   5    0.25    0.24
 -11   1   4    2.03    0.36
 -10   1   3    2.24    0.35
  -9   1   2    0.81    0.25
  -8   1   1    4.18    0.39
  -7   1   0   27.04    0.78
  -6   1  -1   38.74    0.91
  -6   1  -1   38.75    0.64
  -5   1  -2    0.41    0.16
  -5   1  -2    0.32    0.08
  -4   1  -3   75.34    1.29
  -4   1  -3   73.97    1.00
   4  -1   3   75.63    1.29
  -3   1  -4   24.67    0.44
   3  -1   4   24.47    0.48
   3  -1   4   23.67    0.61
   2  -1   5    3.20    0.20
   2  -1   5    2.95    0.27
   1  -1   6    1.58    0.24
   1  -1   6    1.47    0.14
   0  -1   7    8.15    0.44
   0  -1   7    7.84    0.27
  -1  -1   8    7.36    0.39
  -1  -1   8    7.50    0.29
  -2  -1   9   53.21    0.97
  -2  -1   9   50.27    1.03
  -3  -1  10   28.22    0.70
  -3  -1  10   28.99    0.77
  -4  -1  11   56.37    1.19
  -4  -1  11   53.70    1.13
  -5  -1  12    2.68    0.31
  -5  -1  12    3.35    0.35
  -6  -1  13   18.63    0.71
  -6  -1  13   19.44    0.72
  -7  -1  14   11.87    0.60
  -7  -1  14   11.46    0.61
  -8  -1  15    2.50    0.36
  -8  -1  15    3.15    0.40
  -9  -1  16    1.64    0.35
  -9  -1  16    2.25    0.39
 -10  -1  17   11.75    0.74
 -10  -1  17   11.60    0.74
 -13   2   5    2.00    0.39
 -12   2   4    2.47    0.40
 -11   2   3    1.74    0.34
 -10   2   2    3.32    0.39
  -9   2   1    0.66    0.23
  -8   2   0   44.86    1.10
  -8   2   0   46.51    0.83
  -7   2  -1   71.88    1.09
  -7   2  -1   71.26    1.40
  -6   2  -2   29.34    0.57
  -6   2  -2   28.24    0.77
  -5   2  -3    2.35    0.18
   5  -2   3    1.80    0.24
  -4   2  -4   67.97    0.99
   4  -2   4   69.12    1.23
   4  -2   4   67.88    1.01
  -3   2  -5    3.22    0.20
   3  -2   5    2.86    0.27
   3  -2   5    3.63    0.19
  -2   2  -6   16.92    0.42
   2  -2   6   17.74    0.57
   2  -2   6   16.71    0.33
   1  -2   7   15.66    0.56
   1  -2   7   15.47    0.33
   0  -2   8   11.83    0.52
   0  -2   8   11.18    0.32
  -1  -2   9    4.22    0.36
  -1  -2   9    4.09    0.23
  -2  -2  10   20.74    0.66
  -2  -2  10   20.05    0.54
  -3  -2  11   82.29    1.45
  -3  -2  11   83.96    1.57
  -4  -2  12   14.10    0.60
  -4  -2  12   14.54    0.56
  -5  -2  13   27.64    0.88
  -5  -2  13   27.01    0.82
  -6  -2  14   15.81    0.67
  -6  -2  14   16.82    0.73
  -7  -2  15   16.33    0.75
  -7  -2  15   16.68    0.73
  -8  -2  16    0.81    0.27
  -8  -2  16    1.05    0.31
  -9  -2  17    1.32    0.35
  -9  -2  17    1.53    0.35
 -14   3   5    6.10    0.61
 -13   3   4    0.73    0.30
 -12   3   3    8.71    0.60
 -11   3   2   12.33    0.65
 -10   3   1    4.33    0.43
  -9   3   0    2.77    0.34
  -9   3   0    3.49    0.27
  -8   3  -1   33.15    0.92
  -8   3  -1   33.95    0.71
  -7   3  -2   26.18    0.60
  -7   3  -2   27.40    0.77
   7  -3   2   26.51    0.78
  -6   3  -3    0.46    0.11
   6  -3   3    0.04    0.21
  -5   3  -4   45.75    0.80
   5  -3   4   45.80    0.98
  -4   3  -5   50.64    0.85
   4  -3   5   49.94    0.74
   4  -3   5   50.67    1.03
  -3   3  -6   18.84    0.47
   3  -3   6   19.56    0.66
  -2   3  -7   11.87    0.39
   2  -3   7   12.26    0.57
   1  -3   8  120.08    1.57
   1  -3   8  123.15    1.99
   0  -3   9   51.10    1.08
   0  -3   9   54.26    0.85
  -1  -3  10   13.54    0.40
  -1  -3  10   12.88    0.53
  -2  -3  11   37.52    0.96
  -2  -3  11   37.97    0.80
  -3  -3  12  107.79    1.95
  -3  -3  12  108.85    1.78
  -4  -3  13    3.24    0.32
  -4  -3  13    3.32    0.38
  -5  -3  14    6.47    0.43
  -5  -3  14    5.87    0.48
  -6  -3  15   19.44    0.82
  -6  -3  15   20.00    0.77
  -7  -3  16    1.44    0.34
  -7  -3  16    1.40    0.30
  -8  -3  17    8.02    0.60
  -9  -3  18    0.51    0.31
 -14   4   4   -0.06    0.26
 -13   4   3    8.61    0.63
 -12   4   2    9.10    0.60
 -11   4   1    4.63    0.46
 -10   4   0    3.01    0.38
 -10   4   0    2.77    0.28
  -9   4  -1   14.36    0.49
  -9   4  -1   15.26    0.64
   9  -4   1   14.85    0.64
  -8   4  -2   44.69    0.88
   8  -4   2   44.42    1.06
  -7   4  -3   12.65    0.42
   7  -4   3   11.93    0.56
  -6   4  -4    6.97    0.31
   6  -4   4    6.22    0.45
  -5   4  -5   33.62    0.69
   5  -4   5   32.91    0.85
  -4   4  -6   39.89    0.78
   4  -4   6   41.25    0.99
  -3   4  -7    9.86    0.37
   3  -4   7    9.33    0.53
  -2   4  -8   67.20    1.14
   2  -4   8   67.44    1.34
  -1   4  -9   47.81    0.93
   1  -4   9   47.65    1.07
   0  -4  10    6.19    0.42
   0  -4  10    5.95    0.24
  -1  -4  11   10.72    0.55
  -1  -4  11   10.65    0.36
  -2  -4  12    3.19    0.27
  -2  -4  12    3.00    0.36
  -3  -4  13   23.62    0.81
  -3  -4  13   24.00    0.68
  -4  -4  14   -0.17    0.18
  -4  -4  14    0.07    0.15
  -5  -4  15   10.16    0.62
  -5  -4  15   11.09    0.56
  -6  -4  16    9.35    0.62
  -7  -4  17    0.52    0.29
  -8  -4  18    0.81    0.34
 -14   5   3    2.74    0.46
  14  -5  -3    3.46    0.45
 -13   5   2    2.23    0.41
  13  -5  -2    3.02    0.42
 -12   5   1    6.72    0.55
  12  -5  -1    7.24    0.53
 -11   5   0    1.29    0.31
 -11   5   0    1.44    0.24
  11  -5   0    1.17    0.30
 -10   5  -1    5.35    0.35
  10  -5   1    6.30    0.48
  -9   5  -2   63.20    1.17
   9  -5   2   58.91    1.33
  -8   5  -3   20.24    0.59
   8  -5   3   20.66    0.74
  -7   5  -4   33.25    0.76
   7  -5   4   32.45    0.91
  -6   5  -5   10.53    0.41
   6  -5   5   10.44    0.53
  -5   5  -6   11.26    0.42
   5  -5   6   11.68    0.61
  -4   5  -7   12.12    0.44
   4  -5   7   13.12    0.67
  -3   5  -8   16.19    0.51
   3  -5   8   15.40    0.67
  -2   5  -9   40.58    0.86
   2  -5   9   39.77    1.01
  -1   5 -10   37.72    0.86
   1  -5  10   36.65    0.95
   0  -5  11   42.87    1.07
  -1  -5  12   40.55    1.06
  -2  -5  13    0.16    0.23
  -3  -5  14    0.03    0.21
  -4  -5  15    3.90    0.43
  -5  -5  16    2.88    0.41
  -6  -5  17    0.36    0.28
  -7  -5  18    1.81    0.39
  -8  -5  19    1.57    0.39
  13  -6  -1    6.07    0.57
  12  -6   0    2.50    0.39
 -11   6  -1    1.43    0.24
  11  -6   1    1.55    0.32
 -10   6  -2    4.90    0.35
  10  -6   2    4.72    0.46
  -9   6  -3   15.89    0.57
   9  -6   3   15.02    0.65
  -8   6  -4    1.18    0.20
   8  -6   4    1.40    0.31
  -7   6  -5    8.59    0.41
   7  -6   5    8.23    0.57
  -6   6  -6    0.13    0.14
   6  -6   6    0.52    0.33
  -5   6  -7   -0.01    0.13
   5  -6   7    0.07    0.34
  -4   6  -8    8.92    0.40
   4  -6   8    8.59    0.58
  -3   6  -9   20.13    0.60
   3  -6   9   20.53    0.82
  -2   6 -10    3.95    0.33
   2  -6  10    4.44    0.44
  -1   6 -11   19.91    0.65
   1  -6  11   20.40    0.76
   0   6 -12   32.46    0.85
   0  -6  12   30.49    0.93
   1   6 -13    1.39    0.25
  -1  -6  13    1.21    0.28
  -2  -6  14    2.65    0.37
  -3  -6  15    0.06    0.20
  -4  -6  16    5.05    0.53
  -5  -6  17    4.92    0.55
  -6  -6  18    1.58    0.37
  -7  -6  19    4.65    0.57
  13  -7   0    1.02    0.34
 -12   7  -1    0.09    0.17
  12  -7   1    0.26    0.28
 -11   7  -2    3.06    0.33
  11  -7   2    2.91    0.40
 -10   7  -3   16.56    0.63
  10  -7   3   17.31    0.73
  -9   7  -4    2.99    0.31
   9  -7   4    2.94    0.39
  -8   7  -5   11.42    0.49
   8  -7   5   12.89    0.65
  -7   7  -6   18.03    0.61
   7  -7   6   18.36    0.78
  -6   7  -7    3.19    0.29
   6  -7   7    3.16    0.48
  -5   7  -8   28.84    0.78
   5  -7   8   31.10    0.98
  -4   7  -9    6.82    0.39
   4  -7   9    7.40    0.64
  -3   7 -10    3.52    0.32
   3  -7  10    3.64    0.46
  -2   7 -11    1.34    0.24
   2  -7  11    1.24    0.33
  -1   7 -12   18.15    0.64
   1  -7  12   18.42    0.75
   0   7 -13    0.07    0.14
   0  -7  13   -0.07    0.20
   1   7 -14    6.78    0.45
  -1  -7  14    6.26    0.48
   2   7 -15   -0.33    0.14
  -2  -7  15   -0.24    0.22
   3   7 -16    4.84    0.44
  -3  -7  16    5.83    0.50
  -4  -7  17    2.54    0.42
  -5  -7  18    2.01    0.42
  -6  -7  19   11.76    0.78
 -12   8  -2    0.98    0.24
  12  -8   2    0.84    0.34
 -11   8  -3    0.41    0.20
  11  -8   3    1.08    0.33
 -10   8  -4    1.25    0.25
  10  -8   4    1.70    0.37
  -9   8  -5    3.73    0.36
   9  -8   5    4.11    0.47
  -8   8  -6    1.45    0.25
   8  -8   6    1.95    0.40
  -7   8  -7    5.84    0.40
   7  -8   7    6.17    0.57
  -6   8  -8    0.39    0.16
   6  -8   8    0.07    0.36
  -5   8  -9   19.36    0.66
   5  -8   9   18.32    0.82
  -4   8 -10    3.92    0.36
   4  -8  10    3.75    0.45
  -3   8 -11    1.59    0.26
   3  -8  11    1.55    0.36
  -2   8 -12    5.62    0.41
   2  -8  12    4.68    0.48
  -1   8 -13    1.40    0.25
   1  -8  13    1.37    0.33
   0   8 -14    0.38    0.19
   0  -8  14    0.21    0.23
   1   8 -15    1.41    0.28
  -1  -8  15    1.53    0.33
   2   8 -16    0.28    0.20
  -2  -8  16   -0.28    0.23
   3   8 -17    0.95    0.26
  -3  -8  17    1.08    0.34
   4   8 -18    0.51    0.25
  -4  -8  18    0.79    0.32
   5   8 -19    6.96    0.55
  -5  -8  19    5.67    0.62
 -13   9  -2    6.94    0.50
 -12   9  -3    3.24    0.39
 -11   9  -4    1.75    0.29
 -10   9  -5    0.84    0.24
  10  -9   5    0.57    0.35
  -9   9  -6    1.08    0.24
   9  -9   6    1.68    0.44
  -8   9  -7   -0.17    0.14
   8  -9   7    0.13    0.35
  -7   9  -8    1.09    0.23
   7  -9   8    1.10    0.39
  -6   9  -9    0.89    0.22
   6  -9   9    0.92    0.40
  -5   9 -10    0.26    0.17
   5  -9  10    0.06    0.33
  -4   9 -11    1.90    0.28
   4  -9  11    2.09    0.40
  -3   9 -12    0.97    0.22
   3  -9  12    1.37    0.35
  -2   9 -13    1.56    0.27
   2  -9  13    1.34    0.33
  -1   9 -14    0.07    0.18
   1  -9  14   -0.24    0.26
   0   9 -15    2.18    0.33
   0  -9  15    1.52    0.34
   1   9 -16    3.64    0.41
  -1  -9  16    3.61    0.46
   2   9 -17    0.49    0.24
  -2  -9  17    0.77    0.31
   3   9 -18    0.08    0.20
  -3  -9  18    0.06    0.26
   4   9 -19    1.55    0.34
  -4  -9  19    2.11    0.43
 -13  10  -3    0.41    0.22
 -12  10  -4    0.09    0.20
 -11  10  -5    0.57    0.24
 -10  10  -6    1.19    0.26
  -9  10  -7    4.44    0.41
   9 -10   7    3.94    0.53
  -8  10  -8    0.91    0.25
   8 -10   8    0.48    0.41
  -7  10  -9    0.13    0.19
   7 -10   9   -0.04    0.36
  -6  10 -10    0.61    0.22
   6 -10  10    0.67    0.37
  -5  10 -11    0.52    0.22
   5 -10  11    0.81    0.34
  -4  10 -12   -0.19    0.16
   4 -10  12   -0.42    0.26
  -3  10 -13    0.87    0.23
   3 -10  13    0.36    0.30
  -2  10 -14    1.89    0.30
   2 -10  14    1.08    0.34
  -1  10 -15    0.05    0.20
   1 -10  15    0.20    0.27
   0  10 -16    0.28    0.20
   0 -10  16   -0.20    0.24
   1  10 -17    2.11    0.35
  -1 -10  17    1.39    0.35
   2  10 -18   -0.03    0.22
  -2 -10  18    0.00    0.26
   3  10 -19    0.38    0.26
  -3 -10  19    0.77    0.34
 -12  11  -5    0.60    0.25
 -11  11  -6    2.57    0.37
 -10  11  -7    0.66    0.24
  -9  11  -8    3.49    0.40
  -8  11  -9    1.66    0.31
   8 -11   9    1.18    0.43
  -7  11 -10    2.41    0.35
   7 -11  10    1.87    0.44
  -6  11 -11    0.69    0.24
   6 -11  11   -0.26    0.32
  -5  11 -12    1.58    0.31
   5 -11  12    1.31    0.38
  -4  11 -13    3.12    0.38
   4 -11  13    2.97    0.45
  -3  11 -14   -0.13    0.16
   3 -11  14   -0.22    0.27
  -2  11 -15    2.03    0.33
   2 -11  15    1.84    0.40
  -1  11 -16    4.77    0.48
   1 -11  16    5.01    0.55
   0  11 -17    0.08    0.21
   0 -11  17    0.03    0.25
   1  11 -18    1.81    0.36
  -1 -11  18    2.02    0.42
   2  11 -19    0.33    0.26
  -2 -11  19    0.26    0.33
 -12  12  -6    2.35    0.37
 -11  12  -7    1.92    0.35
 -10  12  -8    1.55    0.31
  -9  12  -9    2.73    0.39
  -8  12 -10    0.50    0.24
  -7  12 -11    1.32    0.29
   7 -12  11    0.77    0.39
  -6  12 -12    1.20    0.30
   6 -12  12    0.77    0.37
  -5  12 -13    2.86    0.39
   5 -12  13    2.66    0.46
  -4  12 -14    3.17    0.41
   4 -12  14    2.56    0.45
  -3  12 -15    4.92    0.50
   3 -12  15    6.13    0.60
  -2  12 -16    3.56    0.43
   2 -12  16    4.25    0.54
  -1  12 -17    0.01    0.23
   1 -12  17    0.13    0.28
   0  12 -18    0.01    0.23
   0 -12  18    0.26    0.33
 -10  13  -9    4.79    0.51
  -9  13 -10    8.40    0.60
  -8  13 -11    2.50    0.40
  -7  13 -12    5.96    0.56
  -6  13 -13   12.25    0.69
  -5  13 -14    6.16    0.56
   5 -13  14    6.93    0.66
  -4  13 -15    3.30    0.44
   4 -13  15    3.05    0.48
  -3  13 -16   12.81    0.73
   3 -13  16   12.81    0.79
  -2  13 -17    0.81    0.30
   2 -13  17    0.73    0.35
  -8  14 -12    2.09    0.40
  -7  14 -13    8.06    0.63
  -6  14 -14    1.86    0.39
  -5  14 -15    2.03    0.39
  -3  16  -6    0.29    0.26
  -4  16  -5    1.32    0.32
  -5  16  -4   -0.17    0.21
  -6  16  -3   -0.04    0.22
  -7  16  -2    0.59    0.28
  -2  15  -6    0.20    0.21
  -3  15  -5    5.23    0.47
  -4  15  -4   -0.15    0.19
  -5  15  -3    0.84    0.29
  -6  15  -2    0.19    0.24
  -7  15  -1   11.43    0.66
  -8  15   0    4.59    0.49
  -9  15   1    0.05    0.25
   2  14  -9    1.70    0.46
   1  14  -8    2.84    0.53
   0  14  -7    5.03    0.62
  -1  14  -6    1.77    0.46
  -1  14  -6    2.78    0.34
  -2  14  -5    2.76    0.35
  -2  14  -5    2.07    0.48
  -3  14  -4    6.78    0.48
  -3  14  -4    6.75    0.65
  -4  14  -3    4.60    0.44
  -4  14  -3    4.97    0.56
  -5  14  -2    9.49    0.66
  -5  14  -2   10.11    0.58
  -6  14  -1    3.57    0.42
  -6  14  -1    2.57    0.44
  -7  14   0   15.77    0.80
  -7  14   0   15.18    0.71
  -8  14   1    4.59    0.52
  -8  14   1    4.79    0.48
  -9  14   2    0.39    0.28
  -9  14   2    0.29    0.24
 -10  14   3    8.52    0.64
 -10  14   3    8.30    0.61
   4  13 -10    4.05    0.57
   3  13  -9    2.05    0.45
   2  13  -8    0.22    0.36
   1  13  -7    1.72    0.43
   0  13  -6   11.41    0.75
   0  13  -6   12.24    0.57
  -1  13  -5    6.02    0.42
  -1  13  -5    6.31    0.61
  -2  13  -4    8.76    0.66
  -2  13  -4   10.19    0.52
  -3  13  -3   17.02    0.67
  -3  13  -3   13.61    0.77
  -4  13  -2    0.33    0.20
  -4  13  -2    0.40    0.29
  -5  13  -1    0.04    0.18
  -5  13  -1    0.16    0.25
  -6  13   0    6.62    0.54
  -6  13   0    7.10    0.49
  -7  13   1    5.43    0.54
  -7  13   1    4.88    0.45
  -8  13   2    0.87    0.31
  -8  13   2    0.96    0.27
  -9  13   3    3.53    0.47
  -9  13   3    4.00    0.46
 -10  13   4    0.04    0.26
 -10  13   4    0.34    0.27
 -11  13   5    2.26    0.44
  -5 -12  10    1.44    0.35
   5  12 -10    1.37    0.43
  -4 -12   9    0.59    0.27
   4  12  -9    0.77    0.37
  -3 -12   8    0.67    0.26
   3  12  -8    1.28    0.40
   2  12  -7    0.24    0.30
   1  12  -6   29.21    1.04
   0  12  -5   15.75    0.59
   0  12  -5   15.57    0.78
  -1  12  -4    7.08    0.60
  -1  12  -4    7.12    0.43
  -2  12  -3   35.23    1.13
  -2  12  -3   35.76    0.93
  -3  12  -2   19.68    0.69
  -3  12  -2   18.59    0.83
  -4  12  -1    1.73    0.36
  -4  12  -1    1.70    0.28
  -5  12   0    9.44    0.60
  -5  12   0   10.30    0.54
  -6  12   1    4.24    0.40
  -6  12   1    5.03    0.50
  -7  12   2    1.41    0.28
  -7  12   2    1.02    0.30
  -8  12   3    4.63    0.49
  -8  12   3    5.02    0.46
  -9  12   4    6.20    0.58
  -9  12   4    4.74    0.46
 -10  12   5    4.47    0.52
 -10  12   5    3.88    0.45
 -11  12   6   -0.17    0.23
  -6 -11  10   -0.06    0.25
   6  11 -10    0.79    0.37
  -5 -11   9    6.08    0.53
   5  11  -9    5.49    0.59
  -4 -11   8    0.12    0.22
   4  11  -8    0.03    0.29
  -3 -11   7    5.46    0.44
   3  11  -7    4.68    0.52
  -2 -11   6    3.60    0.38
   2  11  -6    3.36    0.45
  -1 -11   5    6.56    0.41
   1  11  -5    6.02    0.37
   1  11  -5    5.89    0.55
   0  11  -4    1.65    0.38
   0  11  -4    1.67    0.24
  -1  11  -3    9.02    0.45
  -1  11  -3    9.25    0.62
  -2  11  -2   11.34    0.66
  -2  11  -2   11.26    0.49
  -3  11  -1    2.57    0.40
  -3  11  -1    2.41    0.28
  -4  11   0    2.90    0.40
  -4  11   0    2.48    0.29
  -5  11   1    7.00    0.52
  -5  11   1    7.38    0.45
  -6  11   2   15.07    0.63
  -6  11   2   15.25    0.69
  -7  11   3    2.27    0.31
  -7  11   3    1.89    0.34
  -8  11   4   24.16    0.92
  -8  11   4   24.13    0.86
  -9  11   5    3.94    0.47
  -9  11   5    3.13    0.39
 -10  11   6   -0.02    0.22
 -11  11   7    0.68    0.28
  -7 -10  10   -0.02    0.25
   7  10 -10   -0.16    0.29
  -6 -10   9    2.56    0.42
   6  10  -9    2.14    0.42
  -5 -10   8    2.62    0.39
   5  10  -8    3.43    0.47
  -4 -10   7    8.61    0.55
   4  10  -7   10.76    0.66
  -3 -10   6   25.04    0.84
   3  10  -6   26.13    0.93
  -2 -10   5   14.57    0.59
   2  10  -5   14.47    0.72
  -1 -10   4    0.41    0.17
   1  10  -4    0.52    0.16
   1  10  -4    0.48    0.30
   0 -10   3    7.59    0.37
   0  10  -3    7.01    0.55
   0  10  -3    7.23    0.37
  -1  10  -2   12.59    0.48
  -1  10  -2   12.22    0.66
  -2  10  -1    0.33    0.29
  -2  10  -1    0.15    0.15
  -3  10   0    1.78    0.24
  -3  10   0    1.82    0.35
  -4  10   1    0.69    0.19
  -4  10   1    0.22    0.25
  -5  10   2    2.66    0.37
  -5  10   2    2.25    0.28
  -6  10   3    0.36    0.18
  -6  10   3    0.43    0.24
  -7  10   4    8.65    0.56
  -7  10   4    8.08    0.49
  -8  10   5    1.71    0.29
  -8  10   5    1.55    0.33
  -9  10   6    1.23    0.31
 -10  10   7    2.05    0.37
 -11  10   8    6.11    0.59
 -12  10   9    0.28    0.26
  -8  -9  10    0.46    0.30
   8   9 -10    0.66    0.34
  -7  -9   9    2.43    0.41
   7   9  -9    2.84    0.47
  -6  -9   8    1.09    0.30
   6   9  -8    1.42    0.35
  -5  -9   7    1.05    0.28
   5   9  -7    1.23    0.33
  -4  -9   6    4.46    0.43
   4   9  -6    4.90    0.50
  -3  -9   5    1.79    0.29
   3   9  -5    1.81    0.33
  -2  -9   4    0.11    0.16
   2   9  -4    0.30    0.13
   2   9  -4    0.23    0.27
  -1  -9   3    0.13    0.14
   1   9  -3   -0.15    0.10
   1   9  -3    0.39    0.27
   0  -9   2    1.10    0.18
   0   9  -2    1.61    0.35
   0   9  -2    1.01    0.17
   1  -9   1   13.91    0.40
  -1   9  -1   13.54    0.46
  -1   9  -1   14.46    0.69
  -2   9   0    0.79    0.17
  -2   9   0    0.97    0.31
  -3   9   1    8.92    0.41
  -3   9   1    9.51    0.58
  -4   9   2   -0.01    0.15
  -4   9   2    0.09    0.24
  -5   9   3    7.95    0.43
  -5   9   3    7.56    0.48
  -6   9   4    2.80    0.30
  -6   9   4    2.12    0.33
  -7   9   5    0.09    0.20
  -7   9   5    0.20    0.18
  -8   9   6    1.01    0.29
  -9   9   7   -0.19    0.19
 -10   9   8    0.53    0.28
 -11   9   9    0.19    0.23
 -12   9  10    0.18    0.25
  -9  -8  10    0.05    0.26
   9   8 -10    0.23    0.30
  -8  -8   9    2.62    0.42
   8   8  -9    3.50    0.48
  -7  -8   8    2.38    0.39
   7   8  -8    2.32    0.40
  -6  -8   7   -0.27    0.18
   6   8  -7   -0.12    0.23
  -5  -8   6    7.43    0.49
   5   8  -6    7.72    0.56
  -4  -8   5    2.19    0.31
   4   8  -5    1.96    0.34
  -3  -8   4    0.89    0.22
   3   8  -4    1.16    0.29
  -2  -8   3   -0.11    0.13
   2   8  -3   -0.18    0.26
   2   8  -3   -0.01    0.11
  -1  -8   2    1.84    0.22
   1   8  -2    1.49    0.34
   1   8  -2    1.70    0.18
   0  -8   1    1.34    0.17
   0   8  -1    1.08    0.16
   0   8  -1    1.32    0.33
   1  -8   0    1.12    0.14
  -1   8   0    0.87    0.16
  -1   8   0    0.93    0.31
  -2   8   1   13.41    0.61
  -2   8   1   13.04    0.45
  -3   8   2    3.48    0.28
  -3   8   2    3.87    0.41
  -4   8   3    5.00    0.32
  -4   8   3    5.05    0.44
  -5   8   4   17.56    0.70
  -5   8   4   17.85    0.61
  -6   8   5    1.58    0.30
  -6   8   5    1.58    0.24
  -7   8   6    2.57    0.35
  -8   8   7    0.06    0.20
  -9   8   8    3.16    0.42
 -10   8   9    0.04    0.20
 -11   8  10    0.07    0.22
 -12   8  11    0.51    0.28
 -10  -7  10    0.05    0.28
  10   7 -10    0.12    0.29
  -9  -7   9    2.20    0.42
   9   7  -9    2.43    0.45
  -8  -7   8    0.41    0.27
   8   7  -8    0.29    0.27
  -7  -7   7    0.80    0.29
   7   7  -7    1.32    0.33
  -6  -7   6    3.76    0.41
   6   7  -6    3.33    0.41
  -5  -7   5   10.84    0.56
   5   7  -5   11.15    0.59
  -4  -7   4    2.89    0.32
   4   7  -4    3.22    0.40
  -3  -7   3    2.91    0.30
   3   7  -3    3.64    0.39
   3   7  -3    3.35    0.21
  -2  -7   2    1.88    0.23
   2   7  -2    2.24    0.18
   2   7  -2    2.08    0.35
  -1  -7   1    2.23    0.22
   1   7  -1    2.38    0.19
   1   7  -1    2.24    0.32
   0  -7   0    1.70    0.17
   0   7   0    1.90    0.18
   0   7   0    1.53    0.30
   1  -7  -1    0.41    0.10
  -1   7   1    0.56    0.13
  -1   7   1    0.53    0.27
  -2   7   2    8.14    0.53
  -2   7   2    8.44    0.35
  -3   7   3    2.37    0.22
  -3   7   3    2.96    0.34
  -4   7   4    8.17    0.47
  -4   7   4    7.58    0.38
  -5   7   5   17.36    0.67
  -5   7   5   17.57    0.59
  -6   7   6    3.46    0.38
  -7   7   7    9.80    0.56
  -8   7   8    3.58    0.42
  -9   7   9    1.25    0.30
 -10   7  10    1.60    0.34
 -11   7  11    0.37    0.25
 -12   7  12    0.01    0.23
 -10  -6   9    1.20    0.37
  10   6  -9    2.30    0.44
  -9  -6   8    0.68    0.29
   9   6  -8    1.06    0.33
  -8  -6   7   -0.09    0.22
   8   6  -7    0.18    0.26
  -7  -6   6    0.28    0.21
   7   6  -6    0.18    0.24
  -6  -6   5   18.74    0.73
   6   6  -5   17.83    0.73
  -5  -6   4   -0.09    0.16
   5   6  -4   -0.22    0.22
  -4  -6   3   -0.05    0.15
   4   6  -3   -0.09    0.22
  -3  -6   2   17.50    0.57
   3   6  -2   16.09    0.63
   3   6  -2   16.65    0.37
  -2  -6   1    6.06    0.32
   2   6  -1    5.93    0.22
   2   6  -1    5.48    0.42
  -1  -6   0   22.01    0.54
   1   6   0   21.74    0.45
   1   6   0   22.58    0.72
   0  -6  -1   12.87    0.36
   0   6   1   13.07    0.36
   0   6   1   13.85    0.58
  -1   6   2   26.44    0.47
  -1   6   2   26.48    0.78
  -1   6   2   25.40    0.55
  -2   6   3    0.67    0.22
  -2   6   3    0.52    0.13
  -3   6   4   42.78    1.01
  -3   6   4   40.18    0.83
  -4   6   5    7.62    0.47
  -4   6   5    7.44    0.36
  -5   6   6    6.48    0.45
  -6   6   7   12.80    0.59
  -7   6   8    8.94    0.54
  -8   6   9    0.60    0.25
  -9   6  10    3.84    0.44
 -10   6  11    4.45    0.49
 -11   6  12    2.05    0.37
 -12   6  13    2.10    0.40
 -11  -5   9    3.58    0.51
 -10  -5   8    1.45    0.36
  -9  -5   7    1.06    0.33
  -8  -5   6    0.25    0.23
  -7  -5   5   17.73    0.75
  -6  -5   4   10.44    0.55
   6   5  -4   10.37    0.57
  -5  -5   3    3.29    0.34
   5   5  -3    3.20    0.37
  -4  -5   2   11.66    0.49
   4   5  -2   12.01    0.57
   4   5  -2   11.65    0.25
  -3  -5   1    3.69    0.29
   3   5  -1    3.20    0.33
   3   5  -1    3.89    0.15
  -2  -5   0   27.31    0.65
   2   5   0   26.55    0.73
   2   5   0   26.25    0.44
  -1  -5  -1   29.94    0.63
   1   5   1   31.09    0.79
   1   5   1   30.05    0.52
   0  -5  -2    3.92    0.22
   0   5   2    4.55    0.21
   0   5   2    4.63    0.36
  -1   5   3    1.27    0.14
  -1   5   3    0.94    0.22
  -1   5   3    1.12    0.13
  -2   5   4   40.83    0.63
  -2   5   4   40.98    0.77
  -2   5   4   39.88    0.93
  -3   5   5   32.75    0.85
  -3   5   5   33.29    0.51
  -4   5   6    7.99    0.44
  -4   5   6    7.63    0.23
  -5   5   7    0.17    0.18
  -5   5   7   -0.04    0.09
  -6   5   8    6.25    0.28
  -6   5   8    6.45    0.44
  -7   5   9   14.27    0.64
  -8   5  10    0.04    0.18
  -9   5  11    7.10    0.52
 -10   5  12   10.85    0.64
 -11   5  13    4.88    0.54
 -12   5  14    1.60    0.38
 -11  -4   8    2.38    0.43
 -10  -4   7   -0.15    0.23
  -9  -4   6   -0.23    0.18
  -8  -4   5   18.38    0.77
  -7  -4   4   18.74    0.73
  -6  -4   3   22.87    0.76
  -5  -4   2   67.57    1.36
   5   4  -2   67.39    1.37
  -4  -4   1    8.62    0.40
   4   4  -1    8.51    0.44
  -3  -4   0   28.12    0.70
   3   4   0   28.95    0.75
  -2  -4  -1   33.24    0.71
   2   4   1   33.36    0.79
   2   4   1   32.46    0.47
  -1  -4  -2  238.65    3.16
   1   4   2  246.57    3.30
   1   4   2  237.74    2.77
   0   4   3   17.17    0.55
   0   4   3   16.62    0.41
  -1   4   4   49.28    0.82
  -1   4   4   51.44    1.05
  -2   4   5   50.64    0.80
  -2   4   5   49.30    1.03
  -3   4   6   68.42    1.01
  -3   4   6   66.04    1.29
  -4   4   7    0.07    0.10
  -4   4   7    0.25    0.18
  -5   4   8   23.26    0.55
  -5   4   8   24.18    0.76
  -6   4   9    4.81    0.29
  -6   4   9    5.29    0.42
  -7   4  10   -0.12    0.17
  -7   4  10    0.04    0.13
  -8   4  11   14.41    0.68
  -8   4  11   14.80    0.56
  -9   4  12    8.67    0.57
 -10   4  13    7.67    0.58
 -11   4  14   -0.01    0.23
 -12  -3   8   10.04    0.70
 -11  -3   7    0.24    0.24
 -10  -3   6    6.03    0.54
  -9  -3   5   20.46    0.85
  -8  -3   4    7.92    0.51
  -7  -3   3    5.31    0.41
  -6  -3   2    3.31    0.34
  -5  -3   1   31.04    0.83
   5   3  -1   32.24    0.84
  -4  -3   0   -0.04    0.11
   4   3   0   -0.06    0.15
  -3  -3  -1   62.64    1.14
   3   3   1   63.42    1.16
  -2  -3  -2  146.84    2.10
   2   3   2  147.96    2.14
  -1  -3  -3  155.42    2.11
   1   3   3  149.04    2.17
   1   3   3  150.69    2.08
   0   3   4    0.27    0.13
   0   3   4    0.28    0.16
  -1   3   5   57.07    0.95
  -1   3   5   54.69    1.06
  -2   3   6   28.59    0.59
  -2   3   6   27.80    0.70
  -3   3   7    3.09    0.29
  -3   3   7    3.34    0.23
  -4   3   8    0.57    0.18
  -4   3   8    0.63    0.15
  -5   3   9   22.68    0.74
  -5   3   9   22.59    0.60
  -6   3  10   21.73    0.62
  -6   3  10   21.20    0.76
  -7   3  11    6.61    0.39
  -7   3  11    5.84    0.45
  -8   3  12   25.89    0.78
  -8   3  12   24.54    0.89
  -9   3  13    8.71    0.50
  -9   3  13    7.23    0.53
 -10   3  14    0.39    0.24
 -11   3  15    1.60    0.35
 -12  -2   7    5.99    0.61
 -11  -2   6    2.00    0.37
 -10  -2   5    4.66    0.48
  -9  -2   4   18.13    0.76
  -8  -2   3   10.47    0.57
  -7  -2   2   29.63    0.88
  -6  -2   1  128.27    2.15
  -5  -2   0   16.04    0.56
  -4  -2  -1   36.49    0.82
   4   2   1   36.07    0.80
  -3  -2  -2   60.43    1.08
   3   2   2   58.49    1.06
  -2  -2  -3   37.31    0.74
   2   2   3   37.81    0.76
   1   2   4    3.50    0.25
   1   2   4    3.48    0.30
   0   2   5    2.33    0.22
   0   2   5    2.22    0.24
  -1   2   6   10.63    0.42
  -1   2   6   10.10    0.41
  -2   2   7    0.21    0.14
  -2   2   7    0.15    0.14
  -3   2   8    0.09    0.14
  -3   2   8    0.09    0.14
  -4   2   9   24.33    0.72
  -4   2   9   25.07    0.64
  -5   2  10   57.53    1.13
  -5   2  10   56.48    1.26
  -6   2  11    8.37    0.48
  -6   2  11    7.87    0.41
  -7   2  12   61.40    1.31
  -7   2  12   64.28    1.45
  -8   2  13   10.17    0.59
  -8   2  13   10.02    0.52
  -9   2  14    3.16    0.42
  -9   2  14    3.41    0.40
 -10   2  15    0.24    0.24
 -10   2  15   -0.03    0.21
 -11   2  16   -0.02    0.22
 -13  -1   7    5.39    0.59
 -12  -1   6    1.18    0.33
 -11  -1   5    0.76    0.28
 -10  -1   4    4.09    0.46
  -9  -1   3    9.25    0.56
  -8  -1   2    1.05    0.25
  -7  -1   1   14.50    0.62
  -6  -1   0   21.56    0.69
  -5  -1  -1   -0.25    0.13
  -4  -1  -2    0.31    0.14
   4   1   2    0.50    0.16
  -3  -1  -3  188.53    2.09
  -3  -1  -3  183.63    2.62
   3   1   3  186.22    2.53
   2   1   4   24.10    0.56
   2   1   4   25.02    0.60
   1   1   5   -0.18    0.14
   1   1   5    0.02    0.14
   0   1   6    8.32    0.35
   0   1   6    8.59    0.41
  -1   1   7   34.29    0.76
  -1   1   7   36.20    0.76
  -2   1   8   24.03    0.63
  -2   1   8   24.81    0.62
  -3   1   9   38.78    0.83
  -3   1   9   36.79    0.86
  -4   1  10   10.74    0.47
  -4   1  10   11.28    0.50
  -5   1  11    5.79    0.39
  -5   1  11    5.28    0.38
  -6   1  12    1.55    0.26
  -6   1  12    1.23    0.24
  -7   1  13    3.12    0.36
  -7   1  13    2.93    0.37
  -8   1  14   17.68    0.78
  -8   1  14   15.83    0.69
  -9   1  15   -0.17    0.18
  -9   1  15   -0.05    0.21
 -10   1  16    1.04    0.32
 -10   1  16    0.84    0.31
 -13   0   6    2.00    0.41
 -12   0   5    0.25    0.27
 -11   0   4    5.41    0.48
 -10   0   3    3.83    0.43
  -9   0   2    0.30    0.20
  -8   0   1    0.16    0.19
  -7   0   0   38.53    0.99
  -6   0  -1   10.19    0.48
  -5   0  -2    3.76    0.14
  -5   0  -2    3.18    0.28
  -4   0  -3    0.10    0.06
  -4   0  -3   -0.02    0.12
   4   0   3   -0.07    0.14
   4   0   3   -0.07    0.12
  -3   0  -4    4.91    0.18
   3   0   4    4.85    0.31
   3   0   4    5.02    0.27
   2   0   5    0.22    0.14
   2   0   5    0.13    0.15
   1   0   6   14.83    0.42
   1   0   6   14.21    0.52
   0   0   7   22.14    0.65
   0   0   7   22.55    0.53
  -1   0   8    6.57    0.37
  -1   0   8    6.30    0.30
  -2   0   9    2.93    0.25
  -2   0   9    3.49    0.30
  -3   0  10    2.37    0.28
  -3   0  10    2.17    0.25
  -4   0  11   27.39    0.78
  -4   0  11   28.37    0.78
  -5   0  12    1.06    0.21
  -5   0  12    0.85    0.22
  -6   0  13   13.65    0.62
  -6   0  13   12.99    0.60
  -7   0  14    2.57    0.36
  -7   0  14    2.15    0.33
  -8   0  15    1.91    0.34
  -8   0  15    1.80    0.33
  -9   0  16    1.40    0.32
  -9   0  16    1.16    0.30
 -10   0  17    1.19    0.33
 -10   0  17    0.84    0.32
 -13   1   5    0.04    0.26
 -12   1   4    0.33    0.26
 -11   1   3    4.38    0.46
 -10   1   2    6.36    0.50
  -9   1   1    4.39    0.39
  -8   1   0    2.13    0.32
  -7   1  -1    7.88    0.28
  -7   1  -1    7.52    0.46
  -6   1  -2    3.14    0.32
  -6   1  -2    3.09    0.18
  -5   1  -3    2.42    0.16
  -5   1  -3    2.25    0.26
   5  -1   3    1.79    0.25
  -4   1  -4   53.90    0.79
   4  -1   4   53.96    0.91
   4  -1   4   54.16    1.06
  -3   1  -5   37.52    0.63
   3  -1   5   38.87    0.85
   3  -1   5   38.14    0.67
   2  -1   6   32.61    0.79
   2  -1   6   31.94    0.61
   1  -1   7   -0.02    0.10
   1  -1   7   -0.01    0.21
   0  -1   8    7.61    0.43
   0  -1   8    7.91    0.29
  -1  -1   9    9.55    0.35
  -1  -1   9   10.12    0.47
  -2  -1  10    0.30    0.20
  -2  -1  10    0.19    0.12
  -3  -1  11    4.05    0.30
  -3  -1  11    5.62    0.40
  -4  -1  12   19.82    0.70
  -4  -1  12   19.13    0.63
  -5  -1  13    1.68    0.30
  -5  -1  13    1.24    0.25
  -6  -1  14    3.78    0.40
  -6  -1  14    4.93    0.43
  -7  -1  15    0.33    0.20
  -7  -1  15    0.08    0.21
  -8  -1  16    1.01    0.27
  -8  -1  16    0.85    0.28
  -9  -1  17    3.08    0.44
  -9  -1  17    3.17    0.46
 -10  -1  18   -0.27    0.23
 -10  -1  18    0.85    0.34
 -13   2   4    2.36    0.41
 -12   2   3    4.10    0.48
 -11   2   2    5.32    0.46
 -10   2   1    3.04    0.39
  -9   2   0    1.29    0.29
  -8   2  -1    1.93    0.30
  -8   2  -1    2.37    0.21
  -7   2  -2    0.55    0.12
  -7   2  -2    0.35    0.21
  -6   2  -3    0.72    0.12
  -6   2  -3    0.90    0.21
   6  -2   3    0.86    0.24
  -5   2  -4    0.14    0.09
   5  -2   4   -0.09    0.11
   5  -2   4   -0.01    0.17
  -4   2  -5   13.40    0.36
   4  -2   5   13.60    0.35
   4  -2   5   13.15    0.51
  -3   2  -6   13.74    0.37
   3  -2   6   13.32    0.34
   3  -2   6   13.62    0.55
  -2   2  -7   46.53    0.81
   2  -2   7   46.29    1.05
   2  -2   7   46.21    0.72
   1  -2   8    3.48    0.35
   1  -2   8    3.34    0.18
   0  -2   9   -0.14    0.07
   0  -2   9    0.06    0.21
  -1  -2  10    0.03    0.09
  -1  -2  10    0.31    0.22
  -2  -2  11    0.06    0.21
  -2  -2  11   -0.01    0.10
  -3  -2  12   -0.05    0.21
  -3  -2  12   -0.09    0.13
  -4  -2  13    0.94    0.21
  -4  -2  13    0.86    0.25
  -5  -2  14    9.21    0.55
  -5  -2  14    9.33    0.50
  -6  -2  15    0.03    0.16
  -6  -2  15   -0.16    0.19
  -7  -2  16    1.61    0.32
  -7  -2  16    2.08    0.36
  -8  -2  17    0.73    0.29
  -8  -2  17    1.21    0.33
  -9  -2  18    0.38    0.30
  -9  -2  18    0.37    0.28
 -14   3   4    1.37    0.38
 -13   3   3    0.61    0.31
 -12   3   2    1.76    0.35
 -11   3   1   -0.15    0.22
 -10   3   0    2.47    0.36
  -9   3  -1    0.20    0.13
  -9   3  -1    0.02    0.21
  -8   3  -2    1.56    0.29
  -8   3  -2    1.26    0.17
   8  -3   2    1.40    0.29
  -7   3  -3    9.07    0.35
   7  -3   3    8.67    0.49
  -6   3  -4    3.03    0.21
   6  -3   4    2.87    0.33
  -5   3  -5    0.33    0.11
   5  -3   5    0.31    0.23
   5  -3   5    0.26    0.11
  -4   3  -6    0.59    0.12
   4  -3   6    0.64    0.12
   4  -3   6    0.67    0.24
  -3   3  -7   31.80    0.66
   3  -3   7   31.95    0.86
  -2   3  -8    6.23    0.31
   2  -3   8    6.16    0.47
   2  -3   8    5.77    0.16
   1  -3   9   15.62    0.66
   1  -3   9   14.86    0.33
   0  -3  10    0.53    0.25
   0  -3  10    0.30    0.09
  -1  -3  11    0.22    0.11
  -1  -3  11    0.23    0.24
  -2  -3  12    8.27    0.38
  -2  -3  12    7.63    0.50
  -3  -3  13    0.72    0.25
  -3  -3  13    0.77    0.19
  -4  -3  14   36.26    0.93
  -4  -3  14   35.75    1.04
  -5  -3  15   -0.07    0.19
  -5  -3  15   -0.03    0.16
  -6  -3  16    2.69    0.36
  -6  -3  16    2.32    0.38
  -7  -3  17    0.24    0.25
  -7  -3  17   -0.22    0.18
  -8  -3  18    0.70    0.30
 -14   4   3    0.30    0.31
 -13   4   2    0.61    0.31
 -12   4   1    0.05    0.25
 -11   4   0    3.09    0.41
  11  -4   0    2.87    0.40
 -10   4  -1   -0.12    0.21
 -10   4  -1   -0.20    0.12
  10  -4   1    0.05    0.22
  -9   4  -2    9.40    0.40
   9  -4   2    8.62    0.53
  -8   4  -3   47.03    0.91
   8  -4   3   46.49    1.14
  -7   4  -4    8.61    0.36
   7  -4   4    8.33    0.53
  -6   4  -5    0.88    0.16
   6  -4   5    1.08    0.30
  -5   4  -6    0.28    0.12
   5  -4   6    0.33    0.11
   5  -4   6    0.17    0.27
  -4   4  -7   32.42    0.71
   4  -4   7   33.05    0.92
  -3   4  -8   -0.09    0.10
   3  -4   8    0.30    0.28
  -2   4  -9    3.79    0.29
   2  -4   9    3.16    0.39
  -1   4 -10    3.00    0.27
   1  -4  10    3.13    0.38
   1  -4  10    3.59    0.16
   0  -4  11    1.82    0.32
   0  -4  11    1.50    0.15
  -1  -4  12    7.56    0.32
  -1  -4  12    7.78    0.49
  -2  -4  13    0.23    0.14
  -2  -4  13    0.50    0.26
  -3  -4  14    5.13    0.34
  -3  -4  14    5.18    0.43
  -4  -4  15   -0.09    0.19
  -4  -4  15    0.06    0.14
  -5  -4  16    8.34    0.49
  -5  -4  16    9.10    0.59
  -6  -4  17    0.98    0.32
  -7  -4  18   -0.31    0.22
  -8  -4  19    2.14    0.42
 -14   5   2    1.19    0.39
  14  -5  -2    2.58    0.43
  13  -5  -1    0.80    0.31
  12  -5   0    1.54    0.35
  11  -5   1   -0.08    0.25
 -10   5  -2    0.17    0.15
  10  -5   2    0.16    0.25
  -9   5  -3    9.28    0.43
   9  -5   3    8.86    0.56
  -8   5  -4   14.22    0.50
   8  -5   4   14.74    0.66
  -7   5  -5    3.16    0.27
   7  -5   5    3.39    0.41
  -6   5  -6    0.27    0.13
   6  -5   6    0.10    0.27
  -5   5  -7    5.38    0.32
   5  -5   7    5.15    0.50
  -4   5  -8   18.40    0.56
   4  -5   8   17.36    0.75
  -3   5  -9    0.26    0.14
   3  -5   9    0.67    0.35
  -2   5 -10   22.64    0.64
   2  -5  10   22.17    0.80
  -1   5 -11   26.07    0.72
   1  -5  11   25.90    0.83
   0  -5  12   10.99    0.61
  -1  -5  13   29.90    0.94
  -2  -5  14    3.62    0.41
  -3  -5  15    2.44    0.36
  -4  -5  16    0.97    0.29
  -5  -5  17    9.59    0.65
  -6  -5  18    3.60    0.50
  -7  -5  19    3.22    0.49
  14  -6  -1    1.92    0.39
  13  -6   0   10.12    0.68
  12  -6   1    3.58    0.46
 -11   6  -2    5.27    0.38
  11  -6   2    4.67    0.48
 -10   6  -3   11.24    0.49
  10  -6   3   11.05    0.62
  -9   6  -4    8.96    0.43
   9  -6   4    8.36    0.56
  -8   6  -5    0.01    0.12
   8  -6   5   -0.06    0.25
  -7   6  -6    0.34    0.15
   7  -6   6    0.22    0.32
  -6   6  -7    1.30    0.21
   6  -6   7    0.76    0.35
  -5   6  -8    0.55    0.17
   5  -6   8    0.24    0.38
  -4   6  -9    2.38    0.25
   4  -6   9    2.71    0.46
  -3   6 -10   36.51    0.88
   3  -6  10   38.67    1.11
  -2   6 -11   62.29    1.22
   2  -6  11   61.88    1.40
  -1   6 -12    9.85    0.49
   1  -6  12   10.50    0.58
   0   6 -13   18.09    0.64
   0  -6  13   20.06    0.77
  -1  -6  14   12.66    0.65
  -2  -6  15    0.82    0.27
  -3  -6  16    1.38    0.32
  -4  -6  17    1.90    0.38
  -5  -6  18   17.16    0.88
  -6  -6  19    0.22    0.30
  13  -7   1    0.64    0.31
  12  -7   2    2.32    0.40
 -11   7  -3   -0.07    0.16
  11  -7   3    0.08    0.27
 -10   7  -4   18.46    0.66
  10  -7   4   18.83    0.79
  -9   7  -5    7.53    0.42
   9  -7   5    7.76    0.57
  -8   7  -6    1.13    0.21
   8  -7   6    0.49    0.32
  -7   7  -7   37.44    0.91
   7  -7   7   37.78    1.10
  -6   7  -8   14.06    0.54
   6  -7   8   14.49    0.79
  -5   7  -9    4.03    0.34
   5  -7   9    3.95    0.52
  -4   7 -10    0.12    0.16
   4  -7  10    0.17    0.34
  -3   7 -11   18.43    0.65
   3  -7  11   20.18    0.80
  -2   7 -12    6.30    0.41
   2  -7  12    5.59    0.51
  -1   7 -13    0.52    0.19
   1  -7  13    1.52    0.34
   0   7 -14   11.22    0.56
   0  -7  14   11.36    0.62
   1   7 -15   24.09    0.81
  -1  -7  15   24.39    0.90
   2   7 -16    0.23    0.19
  -2  -7  16    0.24    0.25
   3   7 -17    0.88    0.26
  -3  -7  17    1.43    0.36
  -4  -7  18    9.24    0.67
  -5  -7  19    0.75    0.32
 -12   8  -3    0.18    0.19
  12  -8   3    0.55    0.32
 -11   8  -4    5.80    0.43
  11  -8   4    7.33    0.58
 -10   8  -5   12.92    0.58
  10  -8   5   12.75    0.71
  -9   8  -6    0.33    0.18
   9  -8   6    0.32    0.34
  -8   8  -7    0.35    0.18
   8  -8   7   -0.06    0.34
  -7   8  -8    7.94    0.45
   7  -8   8    8.49    0.67
  -6   8  -9    0.65    0.19
   6  -8   9    0.88    0.38
  -5   8 -10    1.34    0.23
   5  -8  10    1.11    0.37
  -4   8 -11   10.76    0.51
   4  -8  11   10.66    0.68
  -3   8 -12   22.67    0.75
   3  -8  12   22.60    0.87
  -2   8 -13    3.12    0.34
   2  -8  13    2.70    0.41
  -1   8 -14    3.85    0.38
   1  -8  14    4.48    0.49
   0   8 -15   22.32    0.79
   0  -8  15   20.37    0.84
   1   8 -16    0.62    0.24
  -1  -8  16    0.68    0.31
   2   8 -17    3.75    0.42
  -2  -8  17    2.49    0.41
   3   8 -18    2.56    0.37
  -3  -8  18    2.41    0.42
   4   8 -19    1.45    0.32
  -4  -8  19    2.09    0.45
   5   8 -20    0.79    0.30
  -5  -8  20    0.60    0.36
 -12   9  -4    1.91    0.32
 -11   9  -5    8.27    0.51
  11  -9   5    8.70    0.66
 -10   9  -6   21.43    0.76
  10  -9   6   19.43    0.93
  -9   9  -7   -0.14    0.15
   9  -9   7    0.11    0.37
  -8   9  -8   15.09    0.64
   8  -9   8   15.08    0.82
  -7   9  -9    9.95    0.53
   7  -9   9   10.58    0.73
  -6   9 -10    0.71    0.20
   6  -9  10    0.63    0.39
  -5   9 -11    6.47    0.44
   5  -9  11    6.00    0.58
  -4   9 -12    8.27    0.50
   4  -9  12    8.26    0.63
  -3   9 -13    0.05    0.18
   3  -9  13    0.08    0.27
  -2   9 -14    0.09    0.17
   2  -9  14   -0.47    0.26
  -1   9 -15   10.61    0.56
   1  -9  15   10.00    0.66
   0   9 -16   11.94    0.63
   0  -9  16   11.52    0.71
   1   9 -17    1.05    0.28
  -1  -9  17    0.44    0.31
   2   9 -18    3.68    0.43
  -2  -9  18    3.74    0.51
   3   9 -19    3.67    0.46
  -3  -9  19    4.33    0.56
   4   9 -20    0.16    0.25
  -4  -9  20   -0.09    0.29
 -12  10  -5    4.44    0.46
 -10  10  -7    0.31    0.21
  10 -10   7   -0.32    0.38
  -9  10  -8    0.50    0.21
   9 -10   8    0.04    0.39
  -8  10  -9    3.65    0.39
   8 -10   9    3.64    0.55
  -7  10 -10    1.40    0.28
   7 -10  10    0.41    0.43
  -6  10 -11    3.78    0.40
   6 -10  11    3.79    0.52
  -5  10 -12   18.85    0.75
   5 -10  12   20.10    0.87
  -4  10 -13    8.74    0.52
   4 -10  13    9.81    0.66
  -3  10 -14    0.58    0.23
   3 -10  14    0.57    0.33
  -2  10 -15    6.98    0.49
   2 -10  15    5.70    0.57
  -1  10 -16    5.58    0.49
   1 -10  16    6.62    0.61
   0  10 -17    1.05    0.27
   0 -10  17    1.07    0.36
   1  10 -18   -0.32    0.18
  -1 -10  18   -0.08    0.27
   2  10 -19    0.28    0.25
  -2 -10  19    0.39    0.32
 -12  11  -6    3.06    0.40
 -11  11  -7    0.21    0.21
 -10  11  -8    0.29    0.22
  -9  11  -9    0.93    0.26
   9 -11   9    0.76    0.47
  -8  11 -10    3.91    0.44
   8 -11  10    3.45    0.55
  -7  11 -11    0.75    0.25
   7 -11  11    0.95    0.44
  -6  11 -12    7.75    0.52
   6 -11  12    7.36    0.65
  -5  11 -13   12.90    0.66
   5 -11  13   11.15    0.71
  -4  11 -14    1.94    0.33
   4 -11  14    1.50    0.40
  -3  11 -15    4.09    0.45
   3 -11  15    3.34    0.47
  -2  11 -16    5.14    0.50
   2 -11  16    5.80    0.60
  -1  11 -17    0.98    0.29
   1 -11  17    1.62    0.41
   0  11 -18   -0.28    0.20
   0 -11  18    0.37    0.32
   1  11 -19    0.02    0.25
  -1 -11  19    0.38    0.34
 -11  12  -8    0.87    0.29
 -10  12  -9    2.50    0.39
  -9  12 -10    1.90    0.35
  -8  12 -11    1.38    0.32
  -7  12 -12    0.56    0.25
   7 -12  12    0.27    0.39
  -6  12 -13    0.30    0.24
   6 -12  13    0.02    0.35
  -5  12 -14    1.04    0.29
   5 -12  14    0.43    0.37
  -4  12 -15    0.32    0.22
   4 -12  15   -0.16    0.33
  -3  12 -16    3.61    0.44
   3 -12  16    3.88    0.53
  -2  12 -17    0.18    0.25
   2 -12  17    0.04    0.32
  -1  12 -18    2.44    0.41
   1 -12  18    2.89    0.50
 -10  13 -10   -0.05    0.24
  -9  13 -11    1.35    0.34
  -8  13 -12    4.58    0.50
  -7  13 -13    0.17    0.24
  -6  13 -14   -0.48    0.17
   6 -13  14   -0.89    0.30
  -5  13 -15   -0.18    0.21
   5 -13  15   -0.79    0.32
  -4  13 -16   -0.22    0.23
   4 -13  16   -0.36    0.31
  -3  13 -17    0.17    0.24
   3 -13  17    0.20    0.35
  -3  16  -5    0.57    0.27
  -4  16  -4    0.45    0.26
  -5  16  -3    0.28    0.24
  -6  16  -2    0.18    0.23
  -7  16  -1    1.08    0.31
   1  15  -8    0.64    0.46
   0  15  -7   -0.13    0.40
  -1  15  -6    4.10    0.62
  -2  15  -5    4.14    0.42
  -2  15  -5    3.77    0.60
  -3  15  -4    0.47    0.37
  -3  15  -4    0.14    0.21
  -4  15  -3    1.23    0.30
  -4  15  -3    1.29    0.41
  -5  15  -2    4.89    0.47
  -5  15  -2    4.74    0.56
  -6  15  -1    3.66    0.52
  -6  15  -1    4.13    0.46
  -7  15   0    0.00    0.29
  -7  15   0    0.00    0.21
  -8  15   1    0.17    0.24
   2  14  -8    1.82    0.48
   1  14  -7    0.88    0.43
   0  14  -6    0.13    0.39
  -1  14  -5    2.95    0.52
  -2  14  -4    3.03    0.51
  -2  14  -4    3.37    0.38
  -3  14  -3    2.12    0.44
  -3  14  -3    1.69    0.29
  -4  14  -2    1.71    0.41
  -4  14  -2    2.43    0.34
  -5  14  -1    1.87    0.39
  -5  14  -1    1.82    0.32
  -6  14   0    2.87    0.39
  -6  14   0    1.93    0.41
  -7  14   1   -0.31    0.24
  -7  14   1    0.17    0.23
  -8  14   2    2.61    0.39
  -8  14   2    2.16    0.41
  -9  14   3    0.72    0.29
  -9  14   3    0.00    0.29
 -10  14   4    0.45    0.29
   4  13  -9    1.96    0.47
   3  13  -8    2.57    0.51
   2  13  -7    0.02    0.36
   1  13  -6   -0.41    0.32
   0  13  -5   11.06    0.75
  -1  13  -4    6.32    0.42
  -1  13  -4    7.29    0.65
  -2  13  -3    0.11    0.18
  -2  13  -3    0.35    0.34
  -3  13  -2    0.11    0.31
  -3  13  -2    0.31    0.20
  -4  13  -1   -0.04    0.17
  -4  13  -1   -0.12    0.26
  -5  13   0    0.56    0.31
  -5  13   0    1.16    0.26
  -6  13   1    0.24    0.27
  -6  13   1    0.39    0.22
  -7  13   2    3.36    0.39
  -7  13   2    4.55    0.51
  -8  13   3    0.18    0.19
  -8  13   3   -0.30    0.23
  -9  13   4    4.95    0.50
  -9  13   4    4.76    0.53
 -10  13   5    0.24    0.28
  -5 -12   9    0.62    0.29
   5  12  -9    0.70    0.39
  -4 -12   8    1.62    0.35
   4  12  -8    2.33    0.47
   3  12  -7   -0.09    0.29
   2  12  -6    0.97    0.37
   1  12  -5    2.32    0.44
   0  12  -4    6.09    0.39
   0  12  -4    6.78    0.63
  -1  12  -3    4.09    0.35
  -1  12  -3    4.00    0.51
  -2  12  -2    2.15    0.28
  -2  12  -2    2.18    0.43
  -3  12  -1   11.30    0.54
  -3  12  -1   12.02    0.71
  -4  12   0    1.98    0.29
  -4  12   0    2.41    0.41
  -5  12   1    8.37    0.59
  -5  12   1    8.16    0.49
  -6  12   2    2.10    0.39
  -6  12   2    2.00    0.29
  -7  12   3   12.28    0.69
  -7  12   3   11.90    0.60
  -8  12   4    0.18    0.22
  -8  12   4    0.16    0.24
  -9  12   5    8.57    0.63
  -9  12   5    9.59    0.60
 -10  12   6    7.34    0.61
 -11  12   7    0.12    0.27
  -6 -11   9    1.07    0.33
   6  11  -9    0.57    0.34
  -5 -11   8   21.61    0.90
   5  11  -8   22.21    0.99
  -4 -11   7    2.20    0.36
   4  11  -7    2.22    0.42
  -3 -11   6   15.31    0.67
   3  11  -6   13.98    0.77
  -2 -11   5    3.82    0.38
   2  11  -5    4.86    0.53
   1  11  -4    6.59    0.58
   0  11  -3   -0.12    0.13
   0  11  -3    0.23    0.31
  -1  11  -2   11.37    0.66
  -1  11  -2   10.82    0.48
  -2  11  -1    8.25    0.61
  -2  11  -1    8.94    0.44
  -3  11   0    0.23    0.16
  -3  11   0    0.34    0.27
  -4  11   1   11.17    0.51
  -4  11   1   11.69    0.66
  -5  11   2   12.12    0.55
  -5  11   2   11.19    0.64
  -6  11   3   25.48    0.93
  -6  11   3   25.98    0.84
  -7  11   4    0.37    0.21
  -7  11   4   -0.11    0.22
  -8  11   5   10.38    0.58
  -8  11   5   11.31    0.67
  -9  11   6    6.66    0.56
 -10  11   7    2.18    0.40
 -11  11   8    1.65    0.37
  -7 -10   9    0.26    0.27
   7  10  -9    0.04    0.32
  -6 -10   8    9.63    0.64
   6  10  -8    9.70    0.71
  -5 -10   7   10.24    0.62
   5  10  -7   10.51    0.69
  -4 -10   6    0.04    0.21
   4  10  -6   -0.39    0.27
  -3 -10   5   13.13    0.61
   3  10  -5   13.58    0.73
  -2 -10   4    9.10    0.48
   2  10  -4    8.64    0.61
  -1 -10   3    7.83    0.40
   1  10  -3    7.22    0.35
   1  10  -3    6.32    0.56
   0  10  -2    0.78    0.31
   0  10  -2    0.67    0.16
  -1  10  -1   38.05    1.12
  -1  10  -1   38.01    0.85
  -2  10   0   48.27    1.00
  -2  10   0   49.18    1.28
  -3  10   1    0.61    0.18
  -3  10   1    0.57    0.27
  -4  10   2   20.96    0.66
  -4  10   2   19.52    0.80
  -5  10   3   13.87    0.67
  -5  10   3   13.69    0.57
  -6  10   4   -0.23    0.15
  -6  10   4   -0.18    0.18
  -7  10   5    0.58    0.26
  -7  10   5    1.12    0.24
  -8  10   6    7.48    0.55
  -9  10   7   10.08    0.65
 -10  10   8    0.02    0.23
 -11  10   9    8.37    0.63
  -8  -9   9    4.92    0.56
   8   9  -9    4.39    0.57
  -7  -9   8    3.02    0.45
   7   9  -8    2.38    0.45
  -6  -9   7   14.85    0.73
   6   9  -7   15.25    0.80
  -5  -9   6    7.28    0.52
   5   9  -6    6.78    0.55
  -4  -9   5    3.20    0.37
   4   9  -5    2.84    0.40
  -3  -9   4   22.28    0.75
   3   9  -4   20.86    0.82
  -2  -9   3    7.83    0.41
   2   9  -3    7.58    0.57
  -1  -9   2    1.15    0.20
   1   9  -2    0.92    0.16
   1   9  -2    0.96    0.30
   0  -9   1    6.90    0.33
   0   9  -1    7.57    0.58
   0   9  -1    7.39    0.34
  -1   9   0   27.54    0.93
  -1   9   0   25.95    0.66
  -2   9   1    0.72    0.31
  -2   9   1    0.69    0.16
  -3   9   2    1.76    0.23
  -3   9   2    2.04    0.34
  -4   9   3   18.66    0.61
  -4   9   3   18.19    0.73
  -5   9   4   23.31    0.71
  -5   9   4   23.05    0.82
  -6   9   5    3.72    0.35
  -6   9   5    4.11    0.43
  -7   9   6   15.42    0.72
  -8   9   7   46.94    1.31
  -9   9   8    0.21    0.24
 -10   9   9    5.19    0.57
 -11   9  10    3.20    0.47
  -9  -8   9    4.76    0.57
   9   8  -9    3.83    0.52
  -8  -8   8    0.11    0.23
   8   8  -8    0.43    0.29
  -7  -8   7    6.92    0.56
   7   8  -7    7.30    0.60
  -6  -8   6    9.45    0.60
   6   8  -6    9.54    0.64
  -5  -8   5    0.52    0.23
   5   8  -5    0.78    0.31
  -4  -8   4    8.93    0.49
   4   8  -4    8.26    0.57
  -3  -8   3   22.08    0.70
   3   8  -3   22.65    0.82
  -2  -8   2   32.67    0.81
   2   8  -2   33.34    0.64
   2   8  -2   33.70    1.01
  -1  -8   1    0.45    0.15
   1   8  -1    0.32    0.11
   1   8  -1    0.21    0.30
   0  -8   0   35.07    0.72
   0   8   0   36.20    1.00
   0   8   0   36.06    0.72
   1  -8  -1   18.08    0.42
  -1   8   1   19.25    0.77
  -1   8   1   17.46    0.50
  -2   8   2    1.95    0.36
  -2   8   2    1.46    0.19
  -3   8   3    2.16    0.23
  -3   8   3    2.78    0.36
  -4   8   4   38.46    0.89
  -4   8   4   38.42    1.04
  -5   8   5    5.85    0.36
  -5   8   5    5.33    0.43
  -6   8   6    0.20    0.19
  -7   8   7   22.68    0.86
  -8   8   8   26.45    0.97
  -9   8   9    0.34    0.25
 -10   8  10    5.80    0.57
 -11   8  11    5.23    0.56
 -10  -7   9    5.67    0.64
  10   7  -9    5.31    0.61
  -9  -7   8    0.56    0.30
   9   7  -8    0.36    0.30
  -8  -7   7    1.28    0.33
   8   7  -7    0.62    0.29
  -7  -7   6    3.68    0.45
   7   7  -6    3.93    0.48
  -6  -7   5    2.17    0.33
   6   7  -5    2.49    0.38
  -5  -7   4    1.12    0.26
   5   7  -4    1.66    0.33
  -4  -7   3   12.94    0.56
   4   7  -3   12.55    0.62
  -3  -7   2   35.85    0.89
   3   7  -2   37.97    1.04
  -2  -7   1    2.02    0.23
   2   7  -1    2.06    0.34
   2   7  -1    1.81    0.16
  -1  -7   0   26.14    0.63
   1   7   0   27.64    0.86
   1   7   0   26.77    0.55
   0  -7  -1   36.46    0.71
   0   7   1   37.30    0.97
   0   7   1   35.55    0.69
  -1   7   2    4.78    0.27
  -1   7   2    4.74    0.23
  -1   7   2    5.05    0.45
  -2   7   3    1.30    0.31
  -2   7   3    1.12    0.17
  -3   7   4   10.25    0.54
  -3   7   4   10.10    0.42
  -4   7   5   19.37    0.60
  -4   7   5   18.86    0.72
  -5   7   6    4.34    0.42
  -6   7   7    1.16    0.28
  -7   7   8    3.52    0.40
  -8   7   9    7.47    0.54
  -9   7  10    1.24    0.32
 -10   7  11    2.05    0.36
 -11   7  12    0.45    0.26
 -10  -6   8    0.41    0.27
  10   6  -8    0.34    0.30
  -9  -6   7    1.85    0.38
   9   6  -7    1.61    0.38
  -8  -6   6    6.37    0.51
   8   6  -6    5.16    0.52
  -7  -6   5    2.52    0.37
   7   6  -5    2.27    0.37
  -6  -6   4   -0.02    0.19
   6   6  -4    0.33    0.23
  -5  -6   3    3.42    0.35
   5   6  -3    2.93    0.37
  -4  -6   2   33.57    0.88
   4   6  -2   33.02    0.95
  -3  -6   1   26.61    0.72
   3   6  -1   26.67    0.84
   3   6  -1   26.85    0.46
  -2  -6   0    4.24    0.28
   2   6   0    3.36    0.36
   2   6   0    4.17    0.19
  -1  -6  -1    4.11    0.26
   1   6   1    4.13    0.20
   1   6   1    3.67    0.36
   0  -6  -2   16.69    0.43
   0   6   2   16.79    0.63
   0   6   2   16.09    0.41
  -1   6   3    0.13    0.10
  -1   6   3    0.17    0.22
  -1   6   3    0.16    0.11
  -2   6   4   14.22    0.59
  -2   6   4   15.22    0.45
  -2   6   4   14.19    0.34
  -3   6   5   18.86    0.67
  -4   6   6   -0.07    0.17
  -5   6   7   11.04    0.57
  -6   6   8    3.37    0.38
  -7   6   9    4.27    0.43
  -8   6  10   -0.03    0.18
  -9   6  11   -0.01    0.18
 -10   6  12    4.27    0.49
 -11   6  13   -0.20    0.20
 -11  -5   8    0.16    0.29
  11   5  -8    0.13    0.26
 -10  -5   7    0.09    0.26
  -9  -5   6    5.35    0.53
   9   5  -6    4.10    0.48
  -8  -5   5    4.93    0.49
   8   5  -5    4.45    0.48
  -7  -5   4    3.18    0.39
   7   5  -4    3.76    0.43
  -6  -5   3    5.75    0.43
   6   5  -3    5.26    0.43
  -5  -5   2    0.03    0.16
   5   5  -2   -0.02    0.24
  -4  -5   1    0.45    0.18
   4   5  -1    0.79    0.27
  -3  -5   0    0.69    0.17
   3   5   0    0.61    0.06
   3   5   0    0.50    0.25
  -2  -5  -1    0.95    0.17
   2   5   1    0.90    0.26
   2   5   1    0.80    0.09
  -1  -5  -2    0.14    0.11
   1   5   2   -0.12    0.21
   1   5   2    0.12    0.08
   0   5   3   11.10    0.32
   0   5   3   10.97    0.35
   0   5   3   12.40    0.52
  -1   5   4    5.27    0.39
  -1   5   4    4.75    0.27
  -2   5   5    0.59    0.21
  -2   5   5    0.27    0.14
  -3   5   6    0.84    0.22
  -3   5   6    0.55    0.11
  -4   5   7    8.89    0.48
  -4   5   7    8.89    0.28
  -5   5   8    1.32    0.26
  -5   5   8    1.10    0.15
  -6   5   9    0.47    0.20
  -7   5  10    7.55    0.52
  -8   5  11    2.27    0.35
  -9   5  12    0.09    0.21
 -10   5  13   -0.07    0.21
 -11   5  14    2.66    0.44
 -11  -4   7    0.14    0.24
 -10  -4   6    0.56    0.28
  -9  -4   5    4.76    0.51
  -8  -4   4    4.09    0.45
  -7  -4   3    0.54    0.23
   7   4  -3    0.02    0.22
  -6  -4   2   -0.12    0.18
   6   4  -2   -0.05    0.23
  -5  -4   1    9.28    0.48
   5   4  -1    7.88    0.47
  -4  -4   0    3.83    0.32
   4   4   0    3.37    0.34
  -3  -4  -1   14.13    0.49
   3   4   1   14.26    0.56
  -2  -4  -2    6.12    0.31
   2   4   2    5.55    0.38
  -1  -4  -3  102.36    1.54
   1   4   3  104.35    1.70
   1   4   3  102.81    1.54
   0   4   4  185.59    2.47
   0   4   4  183.39    2.69
  -1   4   5   24.66    0.71
  -1   4   5   25.45    0.58
  -2   4   6    0.12    0.14
  -2   4   6    0.06    0.17
  -3   4   7   22.30    0.70
  -3   4   7   22.49    0.51
  -4   4   8    6.83    0.42
  -4   4   8    6.51    0.29
  -5   4   9    2.24    0.31
  -5   4   9    1.76    0.20
  -6   4  10    1.57    0.21
  -6   4  10    1.34    0.26
  -7   4  11   20.49    0.62
  -7   4  11   19.01    0.79
  -8   4  12    0.00    0.17
  -9   4  13    1.89    0.34
 -10   4  14    1.61    0.35
 -11   4  15    0.28    0.26
 -12  -3   7    4.18    0.55
 -11  -3   6    1.59    0.38
 -10  -3   5    0.61    0.27
  -9  -3   4    2.07    0.37
  -8  -3   3    9.08    0.54
  -7  -3   2    1.22    0.25
  -6  -3   1    0.02    0.16
   6   3  -1    0.05    0.22
  -5  -3   0   -0.07    0.16
   5   3   0    0.03    0.18
  -4  -3  -1    6.85    0.36
   4   3   1    7.12    0.43
  -3  -3  -2   -0.01    0.12
   3   3   2    0.13    0.17
  -2  -3  -3   20.06    0.54
   2   3   3   19.69    0.60
   1   3   4   87.86    1.37
   1   3   4   87.70    1.46
   0   3   5    1.07    0.22
   0   3   5    0.81    0.18
  -1   3   6   23.60    0.66
  -1   3   6   24.46    0.60
  -2   3   7   12.86    0.49
  -2   3   7   12.62    0.42
  -3   3   8   14.11    0.55
  -3   3   8   15.87    0.46
  -4   3   9    3.90    0.28
  -4   3   9    4.06    0.37
  -5   3  10    0.42    0.19
  -5   3  10    0.48    0.17
  -6   3  11   18.85    0.60
  -6   3  11   17.88    0.73
  -7   3  12   -0.04    0.15
  -7   3  12    0.10    0.18
  -8   3  13    8.70    0.55
  -8   3  13    8.31    0.48
  -9   3  14    1.41    0.32
 -10   3  15    2.00    0.39
 -11   3  16    0.01    0.23
 -12  -2   6    2.59    0.43
 -11  -2   5    1.30    0.33
 -10  -2   4    1.81    0.36
  -9  -2   3    5.37    0.46
  -8  -2   2   23.84    0.85
  -7  -2   1    0.05    0.19
  -6  -2   0    4.94    0.40
   6   2   0    5.42    0.41
  -5  -2  -1    0.34    0.18
   5   2   1    0.22    0.19
  -4  -2  -2    2.79    0.27
   4   2   2    3.22    0.29
  -3  -2  -3    0.16    0.13
   3   2   3    0.12    0.17
   2   2   4   79.34    1.33
   2   2   4   80.38    1.32
   1   2   5   26.28    0.62
   1   2   5   25.23    0.66
   0   2   6    2.71    0.27
   0   2   6    2.66    0.27
  -1   2   7    0.53    0.20
  -1   2   7    0.63    0.17
  -2   2   8   33.37    0.73
  -2   2   8   33.12    0.80
  -3   2   9    0.33    0.16
  -3   2   9   -0.11    0.15
  -4   2  10    2.48    0.26
  -4   2  10    2.11    0.28
  -5   2  11   23.21    0.68
  -5   2  11   21.61    0.76
  -6   2  12    0.16    0.16
  -6   2  12    0.27    0.18
  -7   2  13    9.37    0.56
  -7   2  13    9.39    0.50
  -8   2  14    4.42    0.43
  -8   2  14    4.36    0.46
  -9   2  15    0.69    0.28
  -9   2  15    1.00    0.28
 -10   2  16    0.36    0.26
 -13  -1   6    1.83    0.40
 -12  -1   5    7.33    0.61
 -11  -1   4    1.50    0.34
 -10  -1   3    2.98    0.41
  -9  -1   2    0.72    0.24
  -8  -1   1    0.14    0.20
  -7  -1   0    0.72    0.23
  -6  -1  -1    0.30    0.18
  -5  -1  -2    3.62    0.31
   5   1   2    2.91    0.28
  -4  -1  -3    0.17    0.15
   4   1   3    0.06    0.15
  -3  -1  -4    6.01    0.18
   3   1   4    6.56    0.37
   3   1   4    6.68    0.35
   2   1   5   60.48    1.05
   2   1   5   59.56    1.09
   1   1   6    4.50    0.31
   1   1   6    4.76    0.36
   0   1   7   17.26    0.51
   0   1   7   17.39    0.58
  -1   1   8   94.64    1.57
  -1   1   8   97.50    1.55
  -2   1   9   -0.01    0.13
  -2   1   9    0.33    0.19
  -3   1  10    0.80    0.21
  -3   1  10    0.91    0.20
  -4   1  11    5.63    0.39
  -4   1  11    4.83    0.36
  -5   1  12    0.11    0.15
  -5   1  12    0.05    0.17
  -6   1  13    6.59    0.44
  -6   1  13    6.87    0.46
  -7   1  14    0.66    0.24
  -7   1  14    0.68    0.24
  -8   1  15    3.29    0.43
  -8   1  15    4.02    0.44
  -9   1  16    0.40    0.25
  -9   1  16    0.02    0.22
 -10   1  17    0.05    0.23
 -10   1  17    0.06    0.26
 -13   0   5    3.74    0.51
 -12   0   4    0.40    0.26
 -11   0   3    0.24    0.26
 -10   0   2    6.64    0.52
  -9   0   1    2.15    0.34
  -8   0   0    1.79    0.30
  -7   0  -1   20.85    0.72
  -6   0  -2   15.10    0.30
  -6   0  -2   15.40    0.58
  -5   0  -3    2.68    0.14
  -5   0  -3    2.46    0.28
   5   0   3    2.62    0.25
  -4   0  -4   57.81    0.79
   4   0   4   56.59    1.12
   4   0   4   59.78    1.03
  -3   0  -5  123.98    1.56
   3   0   5  125.93    1.79
   3   0   5  125.37    1.93
   2   0   6   27.18    0.61
   2   0   6   26.99    0.71
   1   0   7    5.93    0.31
   1   0   7    5.92    0.40
   0   0   8    6.22    0.45
   0   0   8    5.70    0.29
  -1   0   9    1.46    0.26
  -1   0   9    1.66    0.20
  -2   0  10    0.19    0.20
  -2   0  10   -0.05    0.12
  -3   0  11    2.12    0.28
  -3   0  11    1.87    0.25
  -4   0  12   31.94    0.87
  -4   0  12   31.97    0.86
  -5   0  13    1.01    0.23
  -5   0  13    1.26    0.26
  -6   0  14    8.76    0.52
  -6   0  14    8.34    0.51
  -7   0  15   17.12    0.74
  -7   0  15   16.88    0.73
  -8   0  16    3.06    0.42
  -8   0  16    2.36    0.37
  -9   0  17    0.33    0.26
  -9   0  17    1.02    0.33
 -10   0  18    4.57    0.54
 -10   0  18    4.66    0.56
 -13   1   4    1.02    0.34
 -12   1   3    0.00    0.24
 -11   1   2    5.13    0.52
 -10   1   1   14.88    0.71
  -9   1   0    5.68    0.46
  -8   1  -1   26.37    0.85
  -7   1  -2   14.72    0.37
  -7   1  -2   16.07    0.64
  -6   1  -3    9.58    0.28
  -6   1  -3   10.42    0.49
   6  -1   3    8.88    0.50
  -5   1  -4   29.67    0.52
   5  -1   4   27.80    0.64
   5  -1   4   28.95    0.79
  -4   1  -5   90.89    1.23
   4  -1   5   92.57    1.38
   4  -1   5   93.68    1.59
  -3   1  -6   63.71    0.96
   3  -1   6   64.09    1.02
   3  -1   6   64.18    1.22
   2  -1   7    1.86    0.30
   2  -1   7    1.83    0.19
   1  -1   8    0.81    0.25
   1  -1   8    0.78    0.14
   0  -1   9   33.75    0.69
   0  -1   9   34.44    0.87
  -1  -1  10    0.17    0.12
  -1  -1  10    0.09    0.22
  -2  -1  11   13.54    0.49
  -2  -1  11   13.82    0.58
  -3  -1  12   22.45    0.72
  -3  -1  12   22.05    0.66
  -4  -1  13    1.60    0.28
  -4  -1  13    1.59    0.24
  -5  -1  14    0.13    0.18
  -5  -1  14    0.15    0.20
  -6  -1  15   12.64    0.62
  -6  -1  15   12.88    0.65
  -7  -1  16   10.03    0.60
  -7  -1  16   11.84    0.66
  -8  -1  17    2.70    0.40
  -8  -1  17    2.34    0.40
  -9  -1  18   -0.30    0.23
  -9  -1  18    0.27    0.25
 -13   2   3    0.13    0.27
 -12   2   2    7.88    0.59
 -11   2   1   10.82    0.64
 -10   2   0    2.09    0.35
  -9   2  -1    5.74    0.44
  -8   2  -2   52.59    0.88
  -8   2  -2   51.00    1.22
  -7   2  -3   40.36    0.73
  -7   2  -3   39.53    1.02
   7  -2   3   40.69    1.03
  -6   2  -4    0.95    0.13
   6  -2   4    0.72    0.17
   6  -2   4    0.60    0.26
  -5   2  -5   45.41    0.76
   5  -2   5   43.95    1.01
   5  -2   5   45.01    0.81
  -4   2  -6   45.30    0.78
   4  -2   6   45.31    1.03
   4  -2   6   44.45    0.77
  -3   2  -7    4.93    0.25
   3  -2   7    5.69    0.47
   3  -2   7    5.71    0.27
   2  -2   8   37.77    0.97
   2  -2   8   36.27    0.63
   1  -2   9   48.20    0.81
   1  -2   9   49.60    1.12
   0  -2  10    0.24    0.10
   0  -2  10    0.46    0.26
  -1  -2  11    5.15    0.28
  -1  -2  11    5.50    0.45
  -2  -2  12   66.27    1.39
  -2  -2  12   68.59    1.22
  -3  -2  13   37.74    1.02
  -3  -2  13   38.06    0.91
  -4  -2  14    0.78    0.21
  -4  -2  14    0.83    0.26
  -5  -2  15    6.83    0.49
  -5  -2  15    7.84    0.47
  -6  -2  16   22.60    0.83
  -6  -2  16   22.80    0.90
  -7  -2  17    2.48    0.40
  -7  -2  17    2.11    0.35
  -8  -2  18    3.01    0.44
  -8  -2  18    2.54    0.43
  -9  -2  19    1.78    0.38
  -9  -2  19    1.06    0.36
 -14   3   3   -0.15    0.28
 -13   3   2    0.06    0.27
 -12   3   1    9.03    0.63
 -11   3   0    7.45    0.56
 -10   3  -1    0.68    0.27
  -9   3  -2   30.85    0.95
   9  -3   2   30.11    0.94
  -8   3  -3   22.73    0.56
   8  -3   3   20.99    0.78
  -7   3  -4    0.19    0.11
   7  -3   4    0.39    0.25
  -6   3  -5    4.03    0.25
   6  -3   5    3.83    0.40
   6  -3   5    4.35    0.26
  -5   3  -6   28.61    0.61
   5  -3   6   27.30    0.81
   5  -3   6   27.65    0.55
  -4   3  -7   25.92    0.59
   4  -3   7   26.15    0.49
   4  -3   7   25.51    0.82
  -3   3  -8    0.97    0.16
   3  -3   8    0.45    0.29
   3  -3   8    0.89    0.09
  -2   3  -9    8.62    0.37
   2  -3   9    8.69    0.23
   2  -3   9    9.17    0.61
   1  -3  10   24.67    0.48
   1  -3  10   24.57    0.81
   0  -3  11    0.31    0.26
   0  -3  11    0.43    0.11
  -1  -3  12   12.77    0.62
  -1  -3  12   12.24    0.41
  -2  -3  13  105.82    1.98
  -2  -3  13  110.50    1.75
  -3  -3  14    6.47    0.38
  -3  -3  14    6.12    0.48
  -4  -3  15    3.25    0.33
  -4  -3  15    3.82    0.42
  -5  -3  16    1.84    0.29
  -5  -3  16    1.73    0.33
  -6  -3  17    6.94    0.50
  -6  -3  17    5.45    0.54
  -7  -3  18    6.49    0.62
  -7  -3  18    6.35    0.52
  -8  -3  19    0.43    0.31
 -14   4   2    1.79    0.44
  14  -4  -2    2.67    0.44
 -13   4   1    0.70    0.35
  13  -4  -1    1.25    0.34
 -12   4   0   10.85    0.68
  12  -4   0   13.09    0.71
  11  -4   1    1.13    0.32
  10  -4   2    9.43    0.59
  -9   4  -3   27.91    0.69
   9  -4   3   28.85    0.91
  -8   4  -4   -0.07    0.11
   8  -4   4   -0.03    0.25
  -7   4  -5    0.57    0.15
   7  -4   5    0.63    0.30
  -6   4  -6    2.08    0.21
   6  -4   6    2.59    0.22
   6  -4   6    2.25    0.37
  -5   4  -7   11.51    0.42
   5  -4   7   11.55    0.61
  -4   4  -8    0.50    0.15
   4  -4   8    1.03    0.34
  -3   4  -9    0.50    0.13
   3  -4   9   -0.02    0.34
  -2   4 -10   57.80    1.10
   2  -4  10   60.14    1.38
   1  -4  11    5.54    0.50
   1  -4  11    5.55    0.20
   0  -4  12   13.16    0.37
   0  -4  12   13.70    0.62
  -1  -4  13    0.62    0.14
  -1  -4  13    1.06    0.31
  -2  -4  14    4.32    0.44
  -2  -4  14    3.98    0.29
  -3  -4  15    2.07    0.35
  -3  -4  15    2.76    0.29
  -4  -4  16   -0.07    0.22
  -4  -4  16   -0.06    0.15
  -5  -4  17    0.19    0.19
  -5  -4  17    0.10    0.25
  -6  -4  18    2.76    0.43
  -7  -4  19    1.34    0.35
  14  -5  -1    0.46    0.31
  13  -5   0    1.03    0.34
  12  -5   1    1.61    0.36
  11  -5   2    8.62    0.59
 -10   5  -3    3.65    0.32
  10  -5   3    3.21    0.43
  -9   5  -4   13.65    0.50
   9  -5   4   13.64    0.67
  -8   5  -5    0.76    0.17
   8  -5   5    0.89    0.30
  -7   5  -6    1.99    0.23
   7  -5   6    1.95    0.37
  -6   5  -7    8.53    0.39
   6  -5   7    7.74    0.62
  -5   5  -8   20.41    0.59
   5  -5   8   18.80    0.80
  -4   5  -9    0.44    0.15
   4  -5   9    0.49    0.39
  -3   5 -10    0.11    0.15
   3  -5  10   -0.10    0.33
  -2   5 -11    0.23    0.16
   2  -5  11    0.93    0.37
  -1   5 -12    1.87    0.25
   1  -5  12    2.38    0.40
   0  -5  13    1.15    0.31
  -1  -5  14    3.58    0.42
  -2  -5  15    5.01    0.49
  -3  -5  16   -0.10    0.23
  -4  -5  17    0.50    0.27
  -5  -5  18    0.34    0.28
  -6  -5  19   -0.25    0.25
  -7  -5  20   -0.09    0.25
  14  -6   0    0.46    0.31
  13  -6   1    0.45    0.32
  12  -6   2    2.15    0.40
  11  -6   3    0.33    0.29
 -10   6  -4    2.23    0.27
  10  -6   4    1.86    0.38
  -9   6  -5    0.86    0.20
   9  -6   5    1.27    0.35
  -8   6  -6    0.86    0.19
   8  -6   6    0.55    0.31
  -7   6  -7    0.23    0.14
   7  -6   7    0.20    0.33
  -6   6  -8    6.80    0.38
   6  -6   8    7.90    0.66
  -5   6  -9    0.11    0.14
   5  -6   9    0.15    0.39
  -4   6 -10    6.79    0.40
   4  -6  10    7.43    0.63
  -3   6 -11    0.44    0.18
   3  -6  11    0.58    0.38
  -2   6 -12    0.82    0.21
   2  -6  12    1.32    0.38
  -1   6 -13   10.83    0.52
   1  -6  13   11.17    0.61
   0   6 -14    0.25    0.17
   0  -6  14    0.00    0.25
  -1  -6  15    0.01    0.22
  -2  -6  16    0.43    0.29
  -3  -6  17    0.05    0.25
  -4  -6  18   -0.01    0.27
  -5  -6  19    0.10    0.29
  -6  -6  20    0.06    0.28
  13  -7   2    1.48    0.39
  12  -7   3    5.90    0.57
 -11   7  -4    0.05    0.17
  11  -7   4    0.29    0.30
 -10   7  -5    0.33    0.18
  10  -7   5    0.76    0.33
  -9   7  -6    0.03    0.15
   9  -7   6    0.05    0.31
  -8   7  -7    4.57    0.36
   8  -7   7    4.74    0.52
  -7   7  -8    0.37    0.17
   7  -7   8    0.43    0.34
  -6   7  -9   14.14    0.56
   6  -7   9   15.40    0.82
  -5   7 -10    1.64    0.25
   5  -7  10    1.72    0.41
  -4   7 -11    2.09    0.27
   4  -7  11    1.53    0.40
  -3   7 -12    0.73    0.20
   3  -7  12   -0.14    0.29
  -2   7 -13    2.74    0.32
   2  -7  13    2.54    0.39
  -1   7 -14    0.07    0.16
   1  -7  14   -0.45    0.26
   0   7 -15    1.22    0.26
   0  -7  15    1.48    0.37
   1   7 -16   -0.13    0.16
  -1  -7  16   -0.29    0.21
   2   7 -17    0.49    0.23
  -2  -7  17    0.79    0.30
   3   7 -18   -0.03    0.18
  -3  -7  18   -0.10    0.24
  -4  -7  19    1.05    0.36
  -5  -7  20   -0.16    0.26
  13  -8   3    2.04    0.43
  12  -8   4    0.46    0.34
 -11   8  -5    0.45    0.21
  11  -8   5    1.16    0.39
 -10   8  -6    9.62    0.51
  10  -8   6   10.46    0.70
  -9   8  -7    2.66    0.31
   9  -8   7    3.16    0.50
  -8   8  -8    1.11    0.23
   8  -8   8    0.71    0.41
  -7   8  -9    0.62    0.20
   7  -8   9    0.76    0.38
  -6   8 -10    0.05    0.14
   6  -8  10   -0.40    0.35
  -5   8 -11    0.84    0.22
   5  -8  11    1.05    0.41
  -4   8 -12    0.71    0.20
   4  -8  12    0.46    0.36
  -3   8 -13    0.20    0.18
   3  -8  13   -0.02    0.31
  -2   8 -14    2.56    0.32
   2  -8  14    2.87    0.45
  -1   8 -15    0.48    0.21
   1  -8  15    0.12    0.30
   0   8 -16   10.58    0.58
   0  -8  16   11.27    0.69
   1   8 -17    3.10    0.38
  -1  -8  17    3.31    0.47
   2   8 -18    1.70    0.32
  -2  -8  18    2.28    0.42
   3   8 -19    2.57    0.38
  -3  -8  19    1.64    0.38
   4   8 -20    0.10    0.24
  -4  -8  20   -0.05    0.29
 -12   9  -5   -0.20    0.19
  12  -9   5    0.22    0.36
  11  -9   6    0.83    0.41
 -10   9  -7   12.41    0.60
  10  -9   7   13.19    0.82
  -9   9  -8    1.58    0.28
   9  -9   8    1.71    0.48
  -8   9  -9    4.36    0.41
   8  -9   9    3.74    0.56
  -7   9 -10    4.05    0.39
   7  -9  10    4.02    0.56
  -6   9 -11    0.81    0.23
   6  -9  11    0.05    0.39
  -5   9 -12    0.32    0.19
   5  -9  12    0.11    0.33
  -4   9 -13    0.94    0.23
   4  -9  13    0.38    0.33
  -3   9 -14    2.18    0.31
   3  -9  14    2.15    0.42
  -2   9 -15    3.00    0.37
   2  -9  15    2.86    0.44
  -1   9 -16    0.35    0.20
   1  -9  16   -0.13    0.30
   0   9 -17    2.53    0.35
   0  -9  17    2.97    0.45
   1   9 -18    1.76    0.32
  -1  -9  18    1.67    0.38
   2   9 -19   -0.06    0.19
  -2  -9  19   -0.16    0.27
   3   9 -20    5.61    0.55
  -3  -9  20    5.51    0.63
 -12  10  -6    2.25    0.35
 -11  10  -7    1.47    0.29
 -10  10  -8    0.58    0.23
  10 -10   8    0.71    0.48
  -9  10  -9    0.45    0.22
   9 -10   9   -0.31    0.42
  -8  10 -10    1.61    0.30
   8 -10  10    1.24    0.48
  -7  10 -11    2.07    0.32
   7 -10  11    1.23    0.46
  -6  10 -12    0.09    0.19
   6 -10  12   -0.25    0.37
  -5  10 -13    8.69    0.54
   5 -10  13    9.72    0.70
  -4  10 -14   11.50    0.62
   4 -10  14   11.28    0.72
  -3  10 -15    1.35    0.29
   3 -10  15    0.76    0.34
  -2  10 -16    0.93    0.26
   2 -10  16    1.39    0.39
  -1  10 -17    3.55    0.42
   1 -10  17    3.09    0.46
   0  10 -18    0.53    0.24
   0 -10  18    0.06    0.31
   1  10 -19    2.91    0.41
  -1 -10  19    3.41    0.52
   2  10 -20    1.38    0.33
  -2 -10  20    1.44    0.40
 -12  11  -7    0.72    0.28
 -11  11  -8   -0.26    0.18
 -10  11  -9    0.92    0.27
  -9  11 -10    0.21    0.22
   9 -11  10   -0.21    0.43
  -8  11 -11    6.20    0.54
   8 -11  11    5.33    0.66
  -7  11 -12    8.27    0.53
   7 -11  12    7.37    0.69
  -6  11 -13    0.35    0.22
   6 -11  13   -0.20    0.36
  -5  11 -14   15.99    0.75
   5 -11  14   16.30    0.86
  -4  11 -15    0.11    0.21
   4 -11  15   -0.26    0.33
  -3  11 -16    1.25    0.29
   3 -11  16    1.22    0.41
  -2  11 -17    0.31    0.24
   2 -11  17    0.29    0.33
  -1  11 -18    1.05    0.31
   1 -11  18    0.90    0.38
   0  11 -19    2.30    0.39
   0 -11  19    1.42    0.42
 -11  12  -9    0.15    0.22
 -10  12 -10    0.40    0.25
  -9  12 -11    0.60    0.28
  -8  12 -12    0.41    0.26
   8 -12  12   -0.32    0.40
  -7  12 -13    0.26    0.22
   7 -12  13   -0.88    0.37
  -6  12 -14    1.80    0.35
   6 -12  14    1.74    0.47
   5 -12  15    2.93    0.52
  -4  12 -16   -0.29    0.17
   4 -12  16   -0.09    0.34
  -3  12 -17    0.36    0.25
   3 -12  17    0.11    0.34
  -2  12 -18    0.39    0.26
   2 -12  18    0.07    0.34
  -9  13 -12    0.29    0.25
  -8  13 -13   -0.12    0.23
  -7  13 -14    0.22    0.23
  -6  13 -15    3.27    0.45
   6 -13  15    2.94    0.54
  -5  13 -16    3.31    0.45
   5 -13  16    2.53    0.51
  -4  13 -17    2.72    0.43
   4 -13  17    1.81    0.46
  -4  16  -3    3.00    0.40
  -5  16  -2    1.33    0.32
  -6  16  -1   -0.14    0.22
   1  15  -7   -0.34    0.40
   0  15  -6    8.01    0.79
  -1  15  -5    4.15    0.62
  -2  15  -4    0.34    0.42
  -3  15  -3    6.86    0.69
  -3  15  -3    5.89    0.46
  -4  15  -2   12.57    0.81
  -4  15  -2   14.23    0.68
  -5  15  -1   -0.33    0.28
  -5  15  -1    0.17    0.22
  -6  15   0   11.66    0.65
  -6  15   0   10.81    0.76
  -7  15   1    7.46    0.64
  -7  15   1    6.55    0.57
  -8  15   2    3.75    0.52
  -8  15   2    3.70    0.45
   2  14  -7   -0.04    0.40
   1  14  -6    2.60    0.54
   0  14  -5   11.19    0.81
  -1  14  -4    0.16    0.38
  -2  14  -3    9.91    0.55
  -2  14  -3    9.82    0.75
  -3  14  -2    3.49    0.38
  -3  14  -2    3.51    0.55
  -4  14  -1    6.45    0.47
  -4  14  -1    6.86    0.65
  -5  14   0   -0.06    0.28
  -5  14   0    0.36    0.24
  -6  14   1    5.11    0.47
  -6  14   1    6.06    0.60
  -7  14   2    7.07    0.53
  -7  14   2    7.41    0.62
  -8  14   3    0.45    0.25
  -8  14   3    0.30    0.28
  -9  14   4    1.27    0.32
  -9  14   4    1.00    0.35
   4  13  -8    2.81    0.53
   3  13  -7    3.13    0.55
   2  13  -6    2.87    0.52
   1  13  -5   12.85    0.81
   0  13  -4    0.15    0.35
  -1  13  -3    4.35    0.57
  -1  13  -3    4.81    0.39
  -2  13  -2    9.11    0.49
  -2  13  -2    8.62    0.68
  -3  13  -1    0.82    0.23
  -3  13  -1    0.93    0.37
  -4  13   0    1.16    0.24
  -4  13   0    0.54    0.32
  -5  13   1    1.42    0.27
  -5  13   1    1.16    0.35
  -6  13   2    6.53    0.58
  -6  13   2    7.28    0.50
  -7  13   3    0.13    0.27
  -7  13   3    0.24    0.22
  -8  13   4    0.48    0.29
  -8  13   4    0.97    0.29
  -9  13   5    0.20    0.27
  -9  13   5    0.05    0.22
 -10  13   6   -0.25    0.24
  -5 -12   8    1.69    0.35
   5  12  -8    1.19    0.43
   4  12  -7    0.25    0.37
   3  12  -6    3.25    0.52
   2  12  -5    0.61    0.34
   1  12  -4    0.82    0.38
   0  12  -3    0.13    0.33
  -1  12  -2    5.88    0.39
  -1  12  -2    5.53    0.58
  -2  12  -1    4.51    0.35
  -2  12  -1    5.38    0.57
  -3  12   0   -0.28    0.27
  -3  12   0    0.29    0.18
  -4  12   1   -0.05    0.26
  -4  12   1   -0.02    0.16
  -5  12   2    1.50    0.27
  -5  12   2    1.20    0.34
  -6  12   3   -0.17    0.24
  -6  12   3    0.38    0.19
  -7  12   4    4.86    0.46
  -7  12   4    5.14    0.53
  -8  12   5   -0.23    0.22
  -8  12   5   -0.17    0.20
  -9  12   6   -0.09    0.25
 -10  12   7   -0.06    0.25
  -6 -11   8    0.07    0.25
   6  11  -8    0.30    0.36
  -5 -11   7    1.52    0.34
   5  11  -7    1.78    0.45
  -4 -11   6   -0.03    0.23
   4  11  -6   -0.11    0.28
  -3 -11   5    0.22    0.20
   3  11  -5    0.26    0.32
   2  11  -4    1.18    0.39
   1  11  -3    2.46    0.44
   0  11  -2   13.58    0.50
   0  11  -2   13.55    0.76
  -1  11  -1    1.10    0.37
  -1  11  -1    1.30    0.21
  -2  11   0    0.32    0.17
  -2  11   0    0.54    0.32
  -3  11   1    0.16    0.29
  -3  11   1    0.27    0.16
  -4  11   2    0.05    0.26
  -4  11   2   -0.08    0.15
  -5  11   3    0.12    0.15
  -5  11   3   -0.20    0.22
  -6  11   4    1.30    0.26
  -6  11   4    1.40    0.32
  -7  11   5    2.20    0.31
  -7  11   5    2.20    0.38
  -8  11   6    1.08    0.33
  -9  11   7    0.31    0.25
 -10  11   8    2.51    0.43
 -11  11   9    0.69    0.34
  -7 -10   8    0.92    0.32
   7  10  -8    0.52    0.36
  -6 -10   7    0.65    0.29
   6  10  -7    0.60    0.36
  -5 -10   6    0.30    0.25
   5  10  -6    0.62    0.32
  -4 -10   5    0.57    0.25
   4  10  -5    0.73    0.35
  -3 -10   4    0.39    0.21
   3  10  -4    0.13    0.28
  -2 -10   3    0.53    0.19
   2  10  -3    0.35    0.29
   1  10  -2    0.92    0.35
   0  10  -1    7.48    0.60
   0  10  -1    7.94    0.37
  -1  10   0    0.02    0.13
  -1  10   0   -0.22    0.28
  -2  10   1    1.69    0.35
  -2  10   1    1.35    0.21
  -3  10   2    1.74    0.36
  -3  10   2    1.94    0.24
  -4  10   3    8.82    0.59
  -4  10   3    9.65    0.47
  -5  10   4    1.53    0.31
  -5  10   4    1.33    0.24
  -6  10   5    0.01    0.22
  -6  10   5   -0.07    0.16
  -7  10   6   -0.24    0.19
  -8  10   7    0.05    0.23
  -9  10   8    1.27    0.32
 -10  10   9   -0.20    0.22
 -11  10  10    0.85    0.31
  -8  -9   8    1.25    0.37
   8   9  -8    1.81    0.43
  -7  -9   7    0.12    0.26
   7   9  -7    0.33    0.32
  -6  -9   6   10.40    0.64
   6   9  -6    9.55    0.65
  -5  -9   5    8.71    0.55
   5   9  -5    8.71    0.64
  -4  -9   4    1.11    0.25
   4   9  -4    1.00    0.33
  -3  -9   3    0.12    0.19
   3   9  -3    0.46    0.28
  -2  -9   2    6.64    0.38
   2   9  -2    6.28    0.52
  -1  -9   1    0.32    0.15
   1   9  -1    0.51    0.31
   1   9  -1    0.33    0.12
   0   9   0    0.83    0.16
   0   9   0    0.68    0.33
  -1   9   1    0.36    0.14
  -1   9   1   -0.02    0.26
  -2   9   2    1.98    0.36
  -2   9   2    2.13    0.23
  -3   9   3    1.60    0.22
  -3   9   3    2.03    0.37
  -4   9   4   10.00    0.47
  -4   9   4   10.33    0.60
  -5   9   5   22.13    0.83
  -5   9   5   22.07    0.70
  -6   9   6    0.49    0.25
  -7   9   7    4.12    0.46
  -8   9   8    8.01    0.57
  -9   9   9    0.67    0.28
 -10   9  10   -0.12    0.22
 -11   9  11   -0.27    0.21
  -9  -8   8    2.97    0.49
   9   8  -8    2.80    0.48
  -8  -8   7   -0.19    0.22
   8   8  -7    0.16    0.31
  -7  -8   6    2.75    0.42
   7   8  -6    3.08    0.45
  -6  -8   5   19.84    0.82
   6   8  -5   21.36    0.90
  -5  -8   4    0.40    0.23
   5   8  -4    0.45    0.28
  -4  -8   3    0.39    0.20
   4   8  -3    0.26    0.26
  -3  -8   2   16.33    0.60
   3   8  -2   16.57    0.74
  -2  -8   1    0.95    0.19
   2   8  -1    1.38    0.35
  -1  -8   0    5.08    0.31
   1   8   0    6.13    0.52
   1   8   0    5.63    0.27
   0  -8  -1    0.15    0.13
   0   8   1    0.26    0.32
   0   8   1    0.05    0.10
  -1   8   2    9.81    0.38
  -1   8   2    8.61    0.57
  -2   8   3   15.31    0.50
  -2   8   3   16.29    0.74
  -3   8   4    1.26    0.31
  -3   8   4    1.25    0.20
  -4   8   5   47.75    1.22
  -4   8   5   46.80    1.01
  -5   8   6   21.57    0.81
  -6   8   7    5.79    0.47
  -7   8   8    0.23    0.22
  -8   8   9    1.22    0.31
  -9   8  10    0.97    0.31
 -10   8  11   -0.02    0.19
 -11   8  12    0.40    0.25
 -10  -7   8   10.79    0.77
  10   7  -8    9.85    0.74
  -9  -7   7    0.35    0.28
   9   7  -7    0.49    0.31
  -8  -7   6    0.24    0.26
   8   7  -6    0.74    0.33
  -7  -7   5   12.08    0.67
   7   7  -5   12.52    0.71
  -6  -7   4   10.32    0.59
   6   7  -4    9.14    0.62
  -5  -7   3    0.94    0.24
   5   7  -3    1.01    0.31
  -4  -7   2   11.26    0.53
   4   7  -2   10.23    0.58
  -3  -7   1   51.91    1.12
   3   7  -1   53.01    1.27
  -2  -7   0    0.82    0.18
   2   7   0    0.95    0.30
   2   7   0    1.01    0.12
  -1  -7  -1   15.00    0.48
   1   7   1   15.04    0.39
   1   7   1   15.26    0.67
   0  -7  -2   35.21    0.71
   0   7   2   35.39    0.69
   0   7   2   36.88    1.03
  -1   7   3    9.98    0.32
  -1   7   3    9.03    0.55
  -1   7   3    9.68    0.36
  -2   7   4   11.59    0.42
  -2   7   4   11.91    0.63
  -3   7   5    7.33    0.37
  -3   7   5    6.94    0.49
  -4   7   6   48.30    1.20
  -5   7   7    5.29    0.43
  -6   7   8   12.38    0.62
  -7   7   9    0.66    0.24
  -8   7  10    0.16    0.20
  -9   7  11    0.95    0.31
 -10   7  12    2.54    0.43
 -11   7  13    2.27    0.42
 -10  -6   7    2.88    0.47
  10   6  -7    3.18    0.49
  -9  -6   6    1.71    0.38
   9   6  -6    1.61    0.38
  -8  -6   5   14.03    0.72
   8   6  -5   13.61    0.74
  -7  -6   4   12.75    0.65
   7   6  -4   12.38    0.69
  -6  -6   3   -0.26    0.17
   6   6  -3    0.32    0.24
  -5  -6   2    0.52    0.20
   5   6  -2    0.20    0.26
  -4  -6   1   23.13    0.72
   4   6  -1   24.28    0.82
  -3  -6   0   23.19    0.68
   3   6   0   25.08    0.82
  -2  -6  -1    0.97    0.19
   2   6   1    0.73    0.28
   2   6   1    0.93    0.11
  -1  -6  -2   18.05    0.51
   1   6   2   18.48    0.69
   1   6   2   19.04    0.42
   0   6   3   22.73    0.53
   0   6   3   22.61    0.50
   0   6   3   22.93    0.79
  -1   6   4   15.88    0.65
  -1   6   4   16.08    0.43
  -2   6   5    4.63    0.29
  -2   6   5    4.62    0.42
  -3   6   6   46.08    1.11
  -4   6   7    9.47    0.52
  -5   6   8   13.54    0.64
  -6   6   9   16.32    0.71
  -7   6  10    3.02    0.38
  -8   6  11    0.72    0.24
  -9   6  12    0.37    0.23
 -10   6  13   17.28    0.85
 -11   6  14    1.60    0.37
 -11  -5   7    9.09    0.70
  11   5  -7    8.51    0.69
 -10  -5   6    2.13    0.40
  10   5  -6    1.78    0.39
  -9  -5   5    3.93    0.48
   9   5  -5    2.74    0.43
  -8  -5   4   11.61    0.66
   8   5  -4   10.63    0.64
  -7  -5   3   -0.09    0.20
   7   5  -3    0.08    0.22
  -6  -5   2    0.38    0.21
   6   5  -2    0.39    0.23
  -5  -5   1   11.59    0.54
   5   5  -1   11.37    0.58
  -4  -5   0   14.88    0.57
   4   5   0   14.29    0.65
  -3  -5  -1    2.31    0.26
   3   5   1    2.47    0.34
  -2  -5  -2   36.48    0.80
   2   5   2   35.67    0.92
  -1  -5  -3   30.24    0.67
   1   5   3   30.46    0.85
   0   5   4   16.98    0.46
   0   5   4   16.81    0.63
  -1   5   5    5.67    0.43
  -1   5   5    5.39    0.34
  -2   5   6   32.44    0.65
  -2   5   6   32.41    0.88
  -3   5   7   27.56    0.56
  -3   5   7   28.42    0.84
  -4   5   8    0.28    0.12
  -4   5   8    0.42    0.21
  -5   5   9    1.27    0.26
  -6   5  10   11.60    0.61
  -7   5  11    1.32    0.28
  -8   5  12   -0.02    0.18
  -9   5  13    4.89    0.52
 -10   5  14   12.37    0.72
 -11   5  15   -0.22    0.20
 -11  -4   6    1.60    0.38
  11   4  -6    1.62    0.37
 -10  -4   5    0.12    0.25
  10   4  -5   -0.20    0.22
  -9  -4   4    5.77    0.55
   9   4  -4    6.02    0.53
  -8  -4   3    2.53    0.36
   8   4  -3    2.72    0.38
  -7  -4   2    6.42    0.46
   7   4  -2    7.01    0.50
  -6  -4   1    1.17    0.24
   6   4  -1    1.24    0.30
  -5  -4   0   31.79    0.88
   5   4   0   32.33    0.92
  -4  -4  -1    0.64    0.18
   4   4   1    0.98    0.26
  -3  -4  -2    2.04    0.24
   3   4   2    1.86    0.29
  -2  -4  -3   35.40    0.78
   2   4   3   36.28    0.88
   1   4   4    0.64    0.17
   1   4   4    1.06    0.25
   0   4   5   -0.11    0.21
   0   4   5    0.18    0.16
  -1   4   6    0.14    0.20
  -1   4   6    0.13    0.20
  -2   4   7   51.85    1.12
  -2   4   7   51.79    0.93
  -3   4   8   53.23    0.94
  -3   4   8   52.31    1.16
  -4   4   9   10.99    0.40
  -4   4   9   11.75    0.56
  -5   4  10   49.98    1.22
  -5   4  10   52.98    1.01
  -6   4  11    2.55    0.36
  -6   4  11    3.09    0.29
  -7   4  12    0.92    0.26
  -8   4  13    0.22    0.20
  -9   4  14    3.32    0.44
 -10   4  15    0.47    0.26
 -11   4  16    0.40    0.28
 -12  -3   6    0.27    0.29
 -11  -3   5    0.73    0.31
 -10  -3   4    0.71    0.27
  -9  -3   3   14.29    0.74
  -8  -3   2    0.50    0.24
   8   3  -2    0.62    0.26
  -7  -3   1   13.02    0.62
   7   3  -1   12.56    0.60
  -6  -3   0   21.78    0.73
   6   3   0   21.32    0.74
  -5  -3  -1    0.17    0.18
   5   3   1    0.38    0.24
  -4  -3  -2   -0.15    0.15
   4   3   2    0.15    0.21
  -3  -3  -3    1.67    0.22
   3   3   3    1.59    0.25
   2   3   4    4.19    0.31
   2   3   4    3.49    0.33
   1   3   5   30.15    0.69
   1   3   5   30.37    0.79
   0   3   6   18.35    0.55
   0   3   6   19.20    0.62
  -1   3   7   15.63    0.56
  -1   3   7   15.84    0.54
  -2   3   8   53.57    1.00
  -2   3   8   53.87    1.13
  -3   3   9   32.46    0.88
  -3   3   9   33.21    0.75
  -4   3  10   10.96    0.43
  -4   3  10   10.90    0.54
  -5   3  11    3.91    0.40
  -5   3  11    4.11    0.32
  -6   3  12    7.13    0.41
  -6   3  12    7.13    0.51
  -7   3  13   -0.02    0.18
  -7   3  13   -0.01    0.18
  -8   3  14    0.52    0.23
  -9   3  15    0.27    0.23
 -10   3  16    0.71    0.28
 -12  -2   5    0.61    0.32
 -11  -2   4    0.54    0.26
 -10  -2   3    7.88    0.56
  -9  -2   2   16.24    0.75
  -8  -2   1    0.51    0.24
  -7  -2   0    5.21    0.43
   7   2   0    4.98    0.42
  -6  -2  -1    3.57    0.36
   6   2   1    3.27    0.34
  -5  -2  -2   29.44    0.81
   5   2   2   28.15    0.78
  -4  -2  -3    0.39    0.17
   4   2   3    0.26    0.18
  -3  -2  -4   38.69    0.53
   3   2   4   39.96    0.88
   3   2   4   41.18    0.88
   2   2   5    5.89    0.34
   2   2   5    6.41    0.39
   1   2   6    7.28    0.41
   1   2   6    8.43    0.41
   0   2   7   31.21    0.77
   0   2   7   30.61    0.77
  -1   2   8    0.27    0.22
  -1   2   8    0.06    0.14
  -2   2   9    1.15    0.22
  -2   2   9    1.29    0.24
  -3   2  10    2.74    0.30
  -3   2  10    2.66    0.28
  -4   2  11    2.66    0.33
  -4   2  11    3.09    0.31
  -5   2  12    2.54    0.29
  -5   2  12    2.77    0.34
  -6   2  13    2.75    0.34
  -6   2  13    2.43    0.31
  -7   2  14    3.36    0.39
  -7   2  14    2.92    0.36
  -8   2  15    7.23    0.54
  -8   2  15    7.41    0.50
  -9   2  16    0.03    0.22
 -10   2  17   -0.28    0.20
 -13  -1   5    0.40    0.30
 -12  -1   4    1.06    0.34
 -11  -1   3    3.03    0.43
 -10  -1   2    2.63    0.40
  -9  -1   1    5.38    0.48
  -8  -1   0    0.53    0.23
  -7  -1  -1    5.32    0.40
   7   1   1    5.22    0.39
  -6  -1  -2    0.19    0.18
   6   1   2    0.04    0.19
  -5  -1  -3   24.80    0.73
   5   1   3   25.03    0.69
  -4  -1  -4    0.18    0.06
   4   1   4   -0.05    0.16
   4   1   4    0.20    0.18
  -3  -1  -5   30.32    0.50
   3   1   5   30.23    0.73
   3   1   5   31.37    0.76
   2   1   6   17.12    0.54
   2   1   6   16.64    0.56
   1   1   7   15.60    0.58
   1   1   7   15.92    0.54
   0   1   8    3.43    0.29
   0   1   8    3.20    0.34
  -1   1   9    1.04    0.19
  -1   1   9    1.22    0.27
  -2   1  10   -0.27    0.19
  -2   1  10   -0.14    0.13
  -3   1  11    0.11    0.15
  -3   1  11    0.22    0.19
  -4   1  12    0.05    0.18
  -4   1  12    0.00    0.15
  -5   1  13   -0.02    0.15
  -5   1  13    0.17    0.18
  -6   1  14    0.33    0.21
  -6   1  14    0.12    0.19
  -7   1  15   10.45    0.60
  -7   1  15    9.80    0.56
  -8   1  16    0.63    0.26
  -8   1  16    0.49    0.26
  -9   1  17    0.89    0.30
  -9   1  17    0.72    0.30
 -10   1  18    0.56    0.29
 -13   0   4   -0.11    0.25
 -12   0   3    0.37    0.28
 -11   0   2    4.88    0.52
 -10   0   1    0.07    0.23
  -9   0   0   -0.04    0.20
  -8   0  -1    0.24    0.21
  -7   0  -2    2.16    0.30
   7   0   2    2.10    0.29
  -6   0  -3   -0.02    0.06
  -6   0  -3   -0.13    0.18
   6   0   3   -0.17    0.16
  -5   0  -4    0.19    0.07
   5   0   4    0.36    0.18
   5   0   4   -0.06    0.19
  -4   0  -5   12.03    0.29
   4   0   5   11.96    0.45
   4   0   5   11.67    0.53
  -3   0  -6    0.06    0.09
   3   0   6    0.01    0.21
   3   0   6    0.28    0.17
   2   0   7    9.08    0.38
   2   0   7    8.91    0.49
   1   0   8    6.50    0.46
   1   0   8    7.22    0.35
   0   0   9   11.11    0.41
   0   0   9   11.16    0.57
  -1   0  10    0.06    0.23
  -1   0  10    0.13    0.13
  -2   0  11    1.66    0.29
  -2   0  11    1.32    0.21
  -3   0  12    4.55    0.35
  -3   0  12    3.85    0.37
  -4   0  13    1.40    0.24
  -4   0  13    1.81    0.29
  -5   0  14    2.38    0.33
  -5   0  14    2.77    0.33
  -6   0  15    0.27    0.20
  -6   0  15    0.05    0.21
  -7   0  16    0.02    0.21
  -7   0  16   -0.01    0.20
  -8   0  17    1.86    0.36
  -8   0  17    2.10    0.37
  -9   0  18    0.03    0.25
  -9   0  18    0.07    0.24
 -13   1   3    0.00    0.27
 -12   1   2   -0.14    0.25
 -11   1   1    0.60    0.28
 -10   1   0   -0.15    0.22
  -9   1  -1    0.22    0.23
  -8   1  -2    4.54    0.40
  -7   1  -3    2.03    0.31
   7  -1   3    1.55    0.25
   7  -1   3    1.37    0.31
  -6   1  -4    4.29    0.21
   6  -1   4    3.60    0.30
   6  -1   4    4.41    0.41
  -5   1  -5    1.01    0.12
   5  -1   5    1.25    0.21
   5  -1   5    1.20    0.27
  -4   1  -6    6.34    0.25
   4  -1   6    6.10    0.42
   4  -1   6    6.20    0.33
  -3   1  -7    2.14    0.18
   3  -1   7    2.37    0.33
   3  -1   7    2.35    0.23
   2  -1   8    9.90    0.37
   2  -1   8    8.91    0.52
   1  -1   9    0.63    0.15
   1  -1   9    0.65    0.30
   0  -1  10    0.11    0.11
   0  -1  10    0.55    0.27
  -1  -1  11    7.08    0.49
  -1  -1  11    7.01    0.34
  -2  -1  12    0.30    0.23
  -2  -1  12    0.61    0.18
  -3  -1  13    5.25    0.44
  -3  -1  13    5.44    0.37
  -4  -1  14    3.39    0.34
  -4  -1  14    2.88    0.36
  -5  -1  15    1.45    0.30
  -5  -1  15    1.49    0.28
  -6  -1  16    3.04    0.39
  -6  -1  16    2.14    0.36
  -7  -1  17    1.91    0.36
  -7  -1  17    1.88    0.33
  -8  -1  18    0.59    0.27
  -8  -1  18    0.46    0.29
  -9  -1  19    0.06    0.25
  -9  -1  19    0.05    0.27
 -13   2   2    1.15    0.36
 -12   2   1    0.45    0.29
 -11   2   0    0.04    0.24
 -10   2  -1   -0.01    0.24
  -9   2  -2    5.43    0.48
   9  -2   2    4.95    0.48
  -8   2  -3    1.07    0.27
   8  -2   3    0.97    0.27
  -7   2  -4    3.57    0.23
   7  -2   4    3.43    0.40
   7  -2   4    3.79    0.31
  -6   2  -5    0.02    0.09
   6  -2   5   -0.10    0.16
   6  -2   5    0.00    0.25
  -5   2  -6    1.37    0.15
   5  -2   6    1.30    0.30
   5  -2   6    1.80    0.22
  -4   2  -7   46.38    0.82
   4  -2   7   46.29    1.11
   4  -2   7   47.20    0.82
  -3   2  -8   16.55    0.47
   3  -2   8   16.77    0.71
   3  -2   8   16.00    0.42
   2  -2   9    7.07    0.53
   2  -2   9    7.81    0.29
   1  -2  10    2.78    0.40
   1  -2  10    2.03    0.18
   0  -2  11    0.33    0.12
   0  -2  11    0.46    0.30
  -1  -2  12    2.73    0.24
  -1  -2  12    2.34    0.34
  -2  -2  13    1.68    0.22
  -2  -2  13    1.42    0.30
  -3  -2  14   25.05    0.83
  -3  -2  14   26.51    0.75
  -4  -2  15    5.97    0.46
  -4  -2  15    5.70    0.40
  -5  -2  16    1.14    0.25
  -5  -2  16    1.10    0.30
  -6  -2  17    6.50    0.49
  -6  -2  17    6.11    0.53
  -7  -2  18   10.36    0.66
  -7  -2  18   10.09    0.62
  -8  -2  19   -0.18    0.25
  -8  -2  19    0.21    0.25
 -13   3   1    2.80    0.46
  13  -3  -1    2.84    0.44
 -12   3   0   -0.19    0.25
  12  -3   0    0.42    0.27
 -11   3  -1    0.22    0.28
  11  -3   1    0.66    0.27
 -10   3  -2    1.62    0.33
  10  -3   2    2.11    0.37
   9  -3   3   17.16    0.75
  -8   3  -4   12.12    0.41
   8  -3   4   12.54    0.61
  -7   3  -5    3.34    0.25
   7  -3   5    4.35    0.45
   7  -3   5    4.13    0.30
  -6   3  -6    3.98    0.25
   6  -3   6    4.46    0.43
   6  -3   6    4.08    0.29
  -5   3  -7   26.88    0.62
   5  -3   7   26.59    0.56
   5  -3   7   28.31    0.87
  -4   3  -8    2.84    0.23
   4  -3   8    2.82    0.42
   4  -3   8    2.78    0.22
  -3   3  -9    4.48    0.29
   3  -3   9    3.92    0.46
   3  -3   9    4.87    0.19
  -2   3 -10    3.45    0.28
   2  -3  10    3.49    0.17
   2  -3  10    3.23    0.43
   1  -3  11   32.21    0.60
   1  -3  11   33.72    0.98
   0  -3  12   15.43    0.43
   0  -3  12   14.88    0.66
  -1  -3  13    0.44    0.29
  -1  -3  13   -0.06    0.09
  -2  -3  14    5.90    0.35
  -2  -3  14    5.93    0.49
  -3  -3  15   10.03    0.47
  -3  -3  15    9.09    0.56
  -4  -3  16    4.69    0.37
  -4  -3  16    4.17    0.46
  -5  -3  17    0.99    0.31
  -5  -3  17    1.17    0.26
  -6  -3  18    8.40    0.63
  -6  -3  18    7.56    0.53
  -7  -3  19    2.34    0.43
  -7  -3  19    3.06    0.42
  -8  -3  20   -0.37    0.26
  14  -4  -1    1.53    0.39
  13  -4   0    1.05    0.35
  12  -4   1    2.76    0.43
  11  -4   2    1.61    0.36
  10  -4   3    0.29    0.25
  -9   4  -4   23.04    0.62
   9  -4   4   22.42    0.86
  -8   4  -5    3.29    0.27
   8  -4   5    3.79    0.42
  -7   4  -6    0.56    0.15
   7  -4   6    0.15    0.30
  -6   4  -7    1.53    0.20
   6  -4   7    1.27    0.37
  -5   4  -8   46.40    0.92
   5  -4   8   45.56    1.22
  -4   4  -9   38.18    0.83
   4  -4   9   39.26    1.13
  -3   4 -10    1.89    0.24
   3  -4  10    1.55    0.40
  -2   4 -11   38.05    0.87
   2  -4  11   36.50    1.09
   1  -4  12    2.68    0.43
   0  -4  13   14.22    0.69
  -1  -4  14    5.95    0.48
  -1  -4  14    5.91    0.30
  -2  -4  15    9.07    0.41
  -2  -4  15    9.58    0.59
  -3  -4  16    3.02    0.31
  -3  -4  16    2.65    0.39
  -4  -4  17    0.44    0.19
  -4  -4  17    0.53    0.27
  -5  -4  18    3.82    0.49
  -5  -4  18    4.52    0.44
  -6  -4  19    1.15    0.37
  -7  -4  20    0.38    0.31
  14  -5   0    0.49    0.34
  13  -5   1    0.76    0.35
  12  -5   2    1.80    0.39
  11  -5   3    0.53    0.30
  10  -5   4    5.08    0.50
  -9   5  -5   13.52    0.51
   9  -5   5   14.26    0.72
  -8   5  -6   11.70    0.46
   8  -5   6   11.46    0.66
  -7   5  -7    7.02    0.36
   7  -5   7    7.35    0.59
  -6   5  -8    3.46    0.29
   6  -5   8    3.39    0.49
  -5   5  -9   49.64    1.02
   5  -5   9   51.46    1.37
  -4   5 -10   16.72    0.56
   4  -5  10   16.71    0.86
  -3   5 -11    9.07    0.44
   3  -5  11    7.42    0.64
  -2   5 -12   -0.07    0.14
   2  -5  12    0.12    0.33
  -1   5 -13    0.89    0.21
   1  -5  13    1.36    0.37
   0  -5  14    0.48    0.26
  -1  -5  15   15.50    0.74
  -2  -5  16    2.16    0.36
  -3  -5  17    0.60    0.30
  -4  -5  18    9.47    0.65
  -5  -5  19   13.37    0.79
  -6  -5  20    0.10    0.29
  13  -6   2    4.81    0.55
  12  -6   3   12.59    0.74
  11  -6   4    0.15    0.30
 -10   6  -5   10.63    0.49
  10  -6   5   12.10    0.70
  -9   6  -6   22.31    0.68
   9  -6   6   23.30    0.91
  -8   6  -7    2.16    0.26
   8  -6   7    2.28    0.42
  -7   6  -8   13.32    0.52
   7  -6   8   13.97    0.77
  -6   6  -9    0.46    0.17
   6  -6   9    0.16    0.38
  -5   6 -10   13.58    0.54
   5  -6  10   12.75    0.75
  -4   6 -11    0.00    0.14
   4  -6  11   -0.16    0.34
  -3   6 -12   21.39    0.68
   3  -6  12   22.08    0.91
  -2   6 -13    2.41    0.30
   2  -6  13    3.08    0.44
  -1   6 -14    0.12    0.15
   1  -6  14    0.38    0.30
   0   6 -15   11.79    0.56
   0  -6  15   12.01    0.68
  -1  -6  16   11.29    0.68
  -2  -6  17   12.98    0.72
  -3  -6  18    0.31    0.28
  -4  -6  19   13.42    0.80
  -5  -6  20    0.37    0.32
  13  -7   3    2.99    0.49
  12  -7   4    5.39    0.58
  11  -7   5    3.55    0.49
 -10   7  -6   10.95    0.53
  10  -7   6   10.92    0.71
  -9   7  -7   14.12    0.58
   9  -7   7   14.27    0.79
  -8   7  -8    0.96    0.21
   8  -7   8    1.47    0.42
  -7   7  -9   10.22    0.48
   7  -7   9    9.75    0.69
  -6   7 -10   20.55    0.68
   6  -7  10   19.99    0.89
  -5   7 -11    2.92    0.32
   5  -7  11    3.18    0.51
  -4   7 -12   19.44    0.69
   4  -7  12   21.19    0.89
  -3   7 -13    3.02    0.34
   3  -7  13    3.11    0.47
  -2   7 -14    0.29    0.18
   2  -7  14    0.11    0.31
  -1   7 -15    0.75    0.23
   1  -7  15    0.71    0.34
   0   7 -16    5.95    0.46
   0  -7  16    7.13    0.60
   1   7 -17   12.33    0.63
  -1  -7  17   13.33    0.75
   2   7 -18    6.56    0.50
  -2  -7  18    6.20    0.60
   3   7 -19    2.53    0.38
  -3  -7  19    2.45    0.45
  -4  -7  20    5.09    0.61
  13  -8   4    0.63    0.36
  12  -8   5    1.00    0.40
 -11   8  -6   10.43    0.56
 -10   8  -7    3.08    0.35
  10  -8   7    2.94    0.50
  -9   8  -8   -0.09    0.16
   9  -8   8   -0.01    0.37
  -8   8  -9    2.35    0.31
   8  -8   9    2.24    0.51
  -7   8 -10    7.68    0.46
   7  -8  10    8.10    0.72
  -6   8 -11    0.86    0.23
   6  -8  11    0.56    0.42
  -5   8 -12    2.44    0.31
   5  -8  12    2.74    0.50
  -4   8 -13    2.51    0.33
   4  -8  13    2.73    0.48
  -3   8 -14   11.60    0.58
   3  -8  14   10.54    0.71
  -2   8 -15    1.15    0.26
   2  -8  15    0.85    0.34
  -1   8 -16    5.16    0.46
   1  -8  16    5.29    0.57
   0   8 -17    4.35    0.43
   0  -8  17    4.65    0.53
   1   8 -18    0.89    0.27
  -1  -8  18    1.24    0.40
   2   8 -19    1.08    0.30
  -2  -8  19    1.22    0.38
   3   8 -20    1.53    0.32
  -3  -8  20    1.69    0.42
  12  -9   6    1.61    0.46
 -11   9  -7    0.50    0.23
  11  -9   7    1.00    0.45
 -10   9  -8    1.39    0.27
  10  -9   8    1.00    0.46
  -9   9  -9    1.40    0.29
   9  -9   9    0.29    0.43
  -8   9 -10    0.51    0.21
   8  -9  10    1.19    0.46
  -7   9 -11    7.74    0.49
   7  -9  11    7.38    0.70
  -6   9 -12    0.39    0.20
   6  -9  12    0.19    0.39
  -5   9 -13    4.99    0.44
   5  -9  13    4.39    0.57
  -4   9 -14    0.93    0.24
   4  -9  14    0.60    0.35
  -3   9 -15    2.69    0.36
   3  -9  15    2.49    0.47
  -2   9 -16    2.22    0.33
   2  -9  16    2.02    0.43
  -1   9 -17    1.99    0.33
   1  -9  17    1.79    0.42
   0   9 -18    7.27    0.52
   0  -9  18    6.46    0.64
   1   9 -19    0.15    0.20
  -1  -9  19    0.10    0.30
   2   9 -20    0.71    0.28
  -2  -9  20    0.57    0.33
 -11  10  -8   -0.22    0.18
  11 -10   8    0.07    0.49
 -10  10  -9    0.85    0.25
  10 -10   9    1.41    0.53
  -9  10 -10    0.11    0.20
   9 -10  10   -0.33    0.41
  -8  10 -11    0.32    0.22
   8 -10  11    0.73    0.47
  -7  10 -12   -0.05    0.18
   7 -10  12   -0.54    0.38
  -6  10 -13    2.69    0.37
   6 -10  13    1.75    0.49
  -5  10 -14   -0.02    0.19
   5 -10  14   -0.29    0.35
  -4  10 -15    0.78    0.26
   4 -10  15    0.35    0.38
  -3  10 -16   -0.09    0.18
   3 -10  16    0.16    0.33
  -2  10 -17    0.05    0.21
   2 -10  17   -0.16    0.32
  -1  10 -18    0.59    0.24
   1 -10  18    0.10    0.33
   0  10 -19    0.15    0.25
   0 -10  19    0.37    0.34
   1  10 -20   -0.17    0.19
  -1 -10  20    0.11    0.32
 -11  11  -9   -0.05    0.19
 -10  11 -10   -0.12    0.18
  10 -11  10   -0.87    0.46
  -9  11 -11    0.14    0.22
   9 -11  11    0.26    0.47
  -8  11 -12   -0.02    0.20
   8 -11  12   -0.44    0.43
  -7  11 -13   -0.05    0.19
   7 -11  13   -0.46    0.38
  -6  11 -14    2.59    0.39
   6 -11  14    2.48    0.51
  -5  11 -15    0.07    0.21
   5 -11  15   -0.40    0.35
  -4  11 -16   -0.30    0.19
   4 -11  16   -0.34    0.34
  -3  11 -17    0.09    0.22
   3 -11  17   -0.18    0.33
  -2  11 -18    4.40    0.49
   2 -11  18    4.87    0.60
  -1  11 -19    0.34    0.25
   1 -11  19    0.16    0.36
 -10  12 -11   -0.13    0.20
  -9  12 -12    0.44    0.26
  -8  12 -13    0.77    0.27
   8 -12  13   -0.31    0.42
  -7  12 -14   -0.07    0.21
   7 -12  14   -0.84    0.36
  -6  12 -15   -0.15    0.21
   6 -12  15   -0.99    0.37
  -5  12 -16    1.74    0.36
   5 -12  16    0.61    0.43
  -4  12 -17    1.32    0.33
   4 -12  17    0.56    0.40
  -3  12 -18    1.62    0.35
   3 -12  18    1.38    0.44
  -2  16  -4   -0.41    0.41
  -3  16  -3    0.17    0.42
  -4  16  -2    2.26    0.36
  -4  16  -2    2.30    0.51
  -5  16  -1    1.37    0.45
  -5  16  -1    2.03    0.35
   1  15  -6   -0.49    0.41
   0  15  -5    2.16    0.57
  -1  15  -4    5.34    0.69
  -2  15  -3   -0.25    0.38
  -3  15  -2   -0.57    0.35
  -3  15  -2    0.25    0.21
  -4  15  -1   11.62    0.62
  -4  15  -1   11.18    0.82
  -5  15   0    8.00    0.54
  -5  15   0    7.65    0.71
  -6  15   1   -0.27    0.29
  -6  15   1    0.22    0.24
  -7  15   2    2.04    0.44
  -7  15   2    2.87    0.40
  -8  15   3    2.57    0.41
   2  14  -6   -0.73    0.35
   1  14  -5    6.37    0.71
   0  14  -4   12.40    0.86
  -1  14  -3    0.04    0.38
  -2  14  -2   -0.38    0.34
  -3  14  -1    2.55    0.48
  -3  14  -1    2.39    0.32
  -4  14   0    7.07    0.67
  -4  14   0    7.86    0.50
  -5  14   1    2.87    0.36
  -5  14   1    3.10    0.48
  -6  14   2    1.25    0.38
  -6  14   2    1.40    0.30
  -7  14   3    2.51    0.45
  -7  14   3    3.55    0.42
  -8  14   4    0.20    0.28
  -8  14   4   -0.10    0.20
  -9  14   5    0.11    0.28
   4  13  -7    5.71    0.67
   3  13  -6    3.96    0.58
   2  13  -5    0.51    0.37
   1  13  -4    6.94    0.68
   0  13  -3   -0.02    0.36
  -1  13  -2    4.33    0.58
  -2  13  -1    0.28    0.36
  -2  13  -1    0.26    0.18
  -3  13   0   12.70    0.58
  -3  13   0   14.87    0.82
  -4  13   1    4.81    0.56
  -4  13   1    3.97    0.38
  -5  13   2   -0.05    0.19
  -5  13   2   -0.21    0.24
  -6  13   3   22.42    0.97
  -6  13   3   22.28    0.82
  -7  13   4    0.37    0.24
  -7  13   4    0.29    0.29
  -8  13   5    5.79    0.53
  -8  13   5    7.47    0.62
  -9  13   6    2.03    0.43
   5  12  -7    3.36    0.56
   4  12  -6   -0.05    0.32
   3  12  -5    0.50    0.39
   2  12  -4    0.19    0.35
   1  12  -3    4.62    0.57
   0  12  -2    0.80    0.38
  -1  12  -1    3.40    0.32
  -1  12  -1    2.89    0.49
  -2  12   0    3.93    0.52
  -2  12   0    3.09    0.31
  -3  12   1    5.91    0.40
  -3  12   1    5.67    0.57
  -4  12   2    0.40    0.31
  -4  12   2    0.51    0.20
  -5  12   3   11.42    0.56
  -5  12   3   12.16    0.71
  -6  12   4    3.79    0.48
  -6  12   4    2.99    0.36
  -7  12   5    2.63    0.44
  -7  12   5    1.78    0.31
  -8  12   6   -0.20    0.24
  -9  12   7    1.54    0.38
 -10  12   8    2.40    0.45
  -6 -11   7    0.48    0.29
   6  11  -7    0.33    0.36
  -5 -11   6    5.30    0.52
   5  11  -6    4.46    0.58
  -4 -11   5    4.08    0.44
   4  11  -5    3.75    0.51
   3  11  -4    0.53    0.36
   2  11  -3   10.00    0.67
   1  11  -2    3.43    0.50
   0  11  -1    0.61    0.35
  -1  11   0    8.52    0.41
  -1  11   0    8.41    0.62
  -2  11   1    5.05    0.36
  -2  11   1    5.12    0.54
  -3  11   2    0.08    0.28
  -3  11   2    0.24    0.16
  -4  11   3    1.83    0.26
  -4  11   3    2.32    0.40
  -5  11   4    3.82    0.38
  -5  11   4    4.29    0.48
  -6  11   5    5.21    0.42
  -6  11   5    4.19    0.48
  -7  11   6    3.26    0.46
  -8  11   7    3.23    0.46
  -9  11   8    6.78    0.58
 -10  11   9    0.10    0.27
  -7 -10   7    0.37    0.29
   7  10  -7    0.15    0.33
  -6 -10   6    6.97    0.56
   6  10  -6    8.36    0.69
  -5 -10   5   13.66    0.68
   5  10  -5   12.78    0.78
  -4 -10   4    0.25    0.20
   4  10  -4    0.26    0.31
  -3 -10   3    6.09    0.44
   3  10  -3    5.01    0.55
  -2 -10   2    8.57    0.45
   2  10  -2    7.61    0.63
   1  10  -1    1.35    0.36
   0  10   0    5.49    0.32
   0  10   0    4.49    0.52
  -1  10   1    6.74    0.59
  -1  10   1    5.93    0.34
  -2  10   2    6.21    0.58
  -2  10   2    6.43    0.37
  -3  10   3    2.73    0.28
  -3  10   3    2.84    0.42
  -4  10   4    7.72    0.57
  -4  10   4    7.35    0.43
  -5  10   5    6.13    0.53
  -5  10   5    6.87    0.43
  -6  10   6    1.53    0.33
  -7  10   7    5.67    0.55
  -8  10   8    0.12    0.25
  -9  10   9    0.52    0.27
 -10  10  10    0.67    0.31
  -8  -9   7    0.19    0.28
   8   9  -7    0.26    0.31
  -7  -9   6    1.53    0.37
   7   9  -6    1.72    0.43
  -6  -9   5    6.19    0.52
   6   9  -5    6.15    0.60
  -5  -9   4    1.34    0.30
   5   9  -4    1.95    0.41
  -4  -9   3    5.28    0.44
   4   9  -3    4.06    0.47
  -3  -9   2   17.16    0.64
   3   9  -2   18.75    0.84
  -2  -9   1    1.01    0.22
   2   9  -1    0.98    0.33
  -1  -9   0    5.87    0.34
   1   9   0    5.24    0.53
   0   9   1    5.71    0.54
   0   9   1    5.49    0.29
  -1   9   2   18.33    0.54
  -1   9   2   16.85    0.76
  -2   9   3   15.07    0.51
  -2   9   3   14.81    0.72
  -3   9   4   21.66    0.65
  -3   9   4   20.51    0.82
  -4   9   5   17.02    0.75
  -4   9   5   17.07    0.60
  -5   9   6    0.56    0.26
  -6   9   7    0.35    0.25
  -7   9   8    6.87    0.55
  -8   9   9    0.09    0.24
  -9   9  10    0.79    0.30
 -10   9  11    2.71    0.46
 -11   9  12    1.57    0.39
  -9  -8   7    2.50    0.46
   9   8  -7    2.97    0.49
  -8  -8   6    0.55    0.29
   8   8  -6   -0.10    0.31
  -7  -8   5    6.20    0.55
   7   8  -5    7.38    0.63
  -6  -8   4    3.05    0.41
   6   8  -4    3.03    0.45
  -5  -8   3    2.38    0.34
   5   8  -3    2.45    0.41
  -4  -8   2    2.46    0.32
   4   8  -2    3.07    0.44
  -3  -8   1    0.40    0.19
   3   8  -1    1.09    0.34
  -2  -8   0    0.97    0.20
   2   8   0    1.00    0.34
  -1  -8  -1    0.23    0.15
   1   8   1    0.28    0.29
   1   8   1    0.33    0.11
   0  -8  -2   20.33    0.54
   0   8   2   20.30    0.80
   0   8   2   20.08    0.52
  -1   8   3   15.87    0.73
  -1   8   3   16.52    0.50
  -2   8   4    0.45    0.31
  -2   8   4    0.78    0.17
  -3   8   5   15.91    0.73
  -3   8   5   16.40    0.55
  -4   8   6    7.11    0.53
  -5   8   7    0.64    0.25
  -6   8   8    8.09    0.54
  -7   8   9    5.59    0.53
  -8   8  10    1.99    0.37
  -9   8  11   -0.01    0.23
 -10   8  12    1.44    0.35
 -11   8  13    2.15    0.41
 -10  -7   7    1.06    0.37
  10   7  -7    1.65    0.42
  -9  -7   6    1.24    0.34
   9   7  -6    1.41    0.39
  -8  -7   5    0.06    0.22
   8   7  -5   -0.43    0.25
  -7  -7   4    0.48    0.27
   7   7  -4    0.90    0.34
  -6  -7   3    0.40    0.23
   6   7  -3    0.35    0.29
  -5  -7   2    4.65    0.40
   5   7  -2    3.60    0.45
  -4  -7   1   14.39    0.60
   4   7  -1   14.68    0.72
  -3  -7   0    0.02    0.16
   3   7   0    0.60    0.31
  -2  -7  -1    2.44    0.26
   2   7   1    2.14    0.40
  -1  -7  -2   12.92    0.46
   1   7   2   12.98    0.65
   1   7   2   12.60    0.36
   0   7   3    7.47    0.59
   0   7   3    8.03    0.32
   0   7   3    7.00    0.34
  -1   7   4    0.39    0.17
  -1   7   4    0.85    0.30
  -2   7   5    1.11    0.32
  -3   7   6    0.41    0.25
  -4   7   7    3.60    0.41
  -5   7   8    0.51    0.24
  -6   7   9    4.19    0.43
  -7   7  10   -0.05    0.19
  -8   7  11    0.86    0.29
  -9   7  12    3.26    0.47
 -10   7  13    0.16    0.23
 -11   7  14   -0.17    0.21
 -10  -6   6   -0.19    0.26
  10   6  -6    0.45    0.31
  -9  -6   5    0.13    0.26
   9   6  -5   -0.07    0.28
  -8  -6   4    4.32    0.48
   8   6  -4    4.75    0.51
  -7  -6   3    0.14    0.20
   7   6  -3   -0.10    0.25
  -6  -6   2    0.66    0.24
   6   6  -2    0.50    0.29
  -5  -6   1    1.49    0.27
   5   6  -1    1.60    0.34
  -4  -6   0    2.13    0.29
   4   6   0    1.90    0.35
  -3  -6  -1    0.03    0.16
   3   6   1    0.05    0.25
  -2  -6  -2    0.04    0.15
   2   6   2    0.11    0.30
  -1  -6  -3    1.02    0.19
   1   6   3    1.00    0.30
   1   6   3    0.49    0.18
   0   6   4    9.15    0.59
   0   6   4   10.27    0.40
  -1   6   5    4.95    0.46
  -1   6   5    4.55    0.34
  -2   6   6   -0.19    0.21
  -2   6   6   -0.06    0.18
  -3   6   7   10.80    0.56
  -4   6   8    0.09    0.20
  -5   6   9    1.05    0.26
  -6   6  10   -0.04    0.20
  -7   6  11    1.50    0.32
  -8   6  12    0.10    0.21
  -9   6  13    0.34    0.24
 -10   6  14    2.60    0.44
 -11  -5   6    0.28    0.31
  11   5  -6    0.39    0.32
 -10  -5   5    0.19    0.28
  10   5  -5    0.55    0.32
  -9  -5   4    1.57    0.36
   9   5  -4    2.03    0.39
  -8  -5   3    1.03    0.29
   8   5  -3    0.65    0.30
  -7  -5   2    0.33    0.23
   7   5  -2    0.24    0.27
  -6  -5   1    6.17    0.44
   6   5  -1    6.67    0.49
  -5  -5   0    3.10    0.33
   5   5   0    2.96    0.39
  -4  -5  -1    0.31    0.18
   4   5   1    0.50    0.29
  -3  -5  -2    2.99    0.29
   3   5   2    2.96    0.37
  -2  -5  -3    4.67    0.32
   2   5   3    4.18    0.41
   1   5   4  164.11    2.58
   1   5   4  165.51    2.36
   0   5   5   13.83    0.65
   0   5   5   13.31    0.45
  -1   5   6   51.74    1.20
  -1   5   6   51.41    0.98
  -2   5   7   15.83    0.65
  -2   5   7   17.15    0.51
  -3   5   8    4.14    0.41
  -3   5   8    3.77    0.28
  -4   5   9    0.94    0.26
  -4   5   9    0.95    0.17
  -5   5  10    0.17    0.19
  -6   5  11    7.17    0.50
  -7   5  12    1.72    0.32
  -8   5  13   -0.08    0.20
  -9   5  14    0.45    0.26
 -10   5  15    3.01    0.45
 -11  -4   5   -0.18    0.26
  11   4  -5    0.54    0.30
 -10  -4   4    1.28    0.33
  10   4  -4    0.99    0.33
  -9  -4   3    6.56    0.56
   9   4  -3    7.01    0.55
  -8  -4   2    1.86    0.33
   8   4  -2    1.36    0.32
  -7  -4   1    0.60    0.24
   7   4  -1    0.62    0.27
  -6  -4   0    0.27    0.20
   6   4   0    0.29    0.24
  -5  -4  -1    3.82    0.36
   5   4   1    3.36    0.38
  -4  -4  -2    0.80    0.20
   4   4   2    0.65    0.26
  -3  -4  -3    4.95    0.35
   3   4   3    4.00    0.40
   2   4   4   27.76    0.80
   2   4   4   27.67    0.69
   1   4   5   45.73    1.06
   1   4   5   48.40    0.94
   0   4   6    4.81    0.37
   0   4   6    5.94    0.47
  -1   4   7    0.26    0.23
  -1   4   7    0.30    0.23
  -2   4   8   25.05    0.64
  -2   4   8   22.74    0.74
  -3   4   9    4.84    0.34
  -3   4   9    5.95    0.44
  -4   4  10    1.51    0.28
  -4   4  10    1.38    0.22
  -5   4  11    6.95    0.36
  -5   4  11    6.92    0.46
  -6   4  12    7.49    0.50
  -7   4  13    0.01    0.22
  -8   4  14    3.64    0.44
  -9   4  15    4.12    0.50
 -10   4  16   -0.05    0.20
 -12  -3   5    0.86    0.35
  12   3  -5    1.80    0.42
 -11  -3   4    8.86    0.66
  11   3  -4    8.67    0.64
 -10  -3   3    0.36    0.27
  10   3  -3    0.64    0.29
  -9  -3   2   30.25    1.05
   9   3  -2   30.62    1.02
  -8  -3   1   12.81    0.64
   8   3  -1   12.14    0.62
  -7  -3   0    5.32    0.45
   7   3   0    5.66    0.45
  -6  -3  -1    7.00    0.45
   6   3   1    7.43    0.48
  -5  -3  -2    3.58    0.35
   5   3   2    3.90    0.38
  -4  -3  -3    4.99    0.37
   4   3   3    4.73    0.40
  -3  -3  -4    0.26    0.17
   3   3   4    0.05    0.21
   3   3   4    0.05    0.18
   2   3   5   65.80    1.28
   2   3   5   65.67    1.21
   1   3   6   35.78    0.90
   1   3   6   36.30    0.82
   0   3   7    0.62    0.24
   0   3   7    0.70    0.25
  -1   3   8   39.72    0.89
  -1   3   8   38.74    0.94
  -2   3   9   11.19    0.53
  -2   3   9   12.69    0.50
  -3   3  10   13.92    0.60
  -3   3  10   14.46    0.53
  -4   3  11   -0.01    0.17
  -4   3  11   -0.02    0.18
  -5   3  12   11.73    0.58
  -5   3  12   12.80    0.50
  -6   3  13    1.84    0.32
  -6   3  13    1.87    0.28
  -7   3  14    0.44    0.21
  -7   3  14    0.62    0.23
  -8   3  15    2.44    0.38
  -9   3  16    2.64    0.42
 -10   3  17    0.49    0.28
 -12  -2   4    6.10    0.62
 -11  -2   3    1.25    0.34
 -10  -2   2    4.84    0.51
  -9  -2   1   38.42    1.16
   9   2  -1   37.26    1.09
  -8  -2   0   13.73    0.65
   8   2   0   12.27    0.60
  -7  -2  -1    0.73    0.25
   7   2   1    0.58    0.24
  -6  -2  -2    2.32    0.31
   6   2   2    2.65    0.33
  -5  -2  -3   26.34    0.79
   5   2   3   24.64    0.75
  -4  -2  -4   20.00    0.66
   4   2   4   19.90    0.66
   4   2   4   19.40    0.65
   3   2   5   23.22    0.68
   3   2   5   23.87    0.70
   2   2   6   57.97    1.15
   2   2   6   58.76    1.13
   1   2   7    7.64    0.45
   1   2   7    7.12    0.43
   0   2   8    7.17    0.48
   0   2   8    7.89    0.43
  -1   2   9   18.70    0.65
  -1   2   9   17.69    0.61
  -2   2  10   17.52    0.62
  -2   2  10   18.00    0.62
  -3   2  11    8.84    0.46
  -3   2  11   10.33    0.48
  -4   2  12   11.72    0.57
  -4   2  12   11.78    0.52
  -5   2  13   15.43    0.60
  -5   2  13   15.35    0.68
  -6   2  14   17.50    0.73
  -6   2  14   18.28    0.70
  -7   2  15    2.74    0.36
  -7   2  15    3.88    0.44
  -8   2  16    9.64    0.63
  -8   2  16    8.30    0.56
  -9   2  17    2.99    0.46
 -10   2  18    0.91    0.33
 -13  -1   4    2.56    0.45
 -12  -1   3    4.26    0.52
 -11  -1   2    0.01    0.25
 -10  -1   1    6.58    0.52
  -9  -1   0   11.40    0.63
  -8  -1  -1    0.01    0.19
   8   1   1    0.09    0.21
  -7  -1  -2   11.39    0.58
   7   1   2   10.76    0.53
  -6  -1  -3   15.21    0.64
   6   1   3   15.15    0.58
  -5  -1  -4    8.64    0.46
   5   1   4    9.71    0.49
   5   1   4    9.43    0.47
  -4  -1  -5    1.68    0.13
   4   1   5    1.24    0.27
   4   1   5    1.12    0.25
   3   1   6   52.46    1.10
   3   1   6   53.16    1.04
   2   1   7   18.06    0.59
   2   1   7   17.23    0.63
   1   1   8    0.75    0.26
   1   1   8    0.86    0.21
   0   1   9   31.96    0.85
   0   1   9   31.90    0.77
  -1   1  10   23.90    0.69
  -1   1  10   24.77    0.76
  -2   1  11   40.52    0.95
  -2   1  11   39.17    0.95
  -3   1  12   -0.04    0.16
  -3   1  12   -0.08    0.20
  -4   1  13    3.08    0.35
  -4   1  13    3.48    0.36
  -5   1  14    9.86    0.54
  -5   1  14    9.94    0.53
  -6   1  15   -0.17    0.16
  -6   1  15   -0.11    0.19
  -7   1  16    6.69    0.52
  -7   1  16    5.03    0.50
  -8   1  17    2.39    0.40
  -8   1  17    1.69    0.35
  -9   1  18    2.43    0.42
 -13   0   3    1.80    0.42
 -12   0   2    0.56    0.32
 -11   0   1   10.29    0.65
 -10   0   0    4.49    0.48
  -9   0  -1    0.88    0.27
  -8   0  -2    2.99    0.37
   8   0   2    2.65    0.31
  -7   0  -3    3.58    0.38
   7   0   3    3.73    0.35
   6   0   4    8.39    0.50
   6   0   4    7.86    0.43
  -5   0  -5    0.31    0.08
   5   0   5    0.31    0.25
   5   0   5    0.36    0.22
  -4   0  -6   24.22    0.47
   4   0   6   23.98    0.64
   4   0   6   22.74    0.72
  -3   0  -7   66.63    0.99
   3   0   7   65.95    1.17
   3   0   7   63.41    1.29
   2   0   8   11.38    0.59
   2   0   8   11.74    0.47
   1   0   9   24.04    0.81
   1   0   9   23.33    0.61
   0   0  10   25.30    0.66
   0   0  10   25.95    0.81
  -1   0  11    6.99    0.38
  -1   0  11    6.72    0.50
  -2   0  12    1.79    0.32
  -2   0  12    1.61    0.24
  -3   0  13    0.51    0.24
  -3   0  13    0.56    0.19
  -4   0  14    8.30    0.47
  -4   0  14    7.51    0.49
  -5   0  15   15.87    0.69
  -5   0  15   16.32    0.67
  -6   0  16    0.40    0.24
  -6   0  16    0.78    0.25
  -7   0  17    5.03    0.52
  -7   0  17    4.85    0.50
  -8   0  18    9.60    0.64
  -8   0  18    9.26    0.63
  -9   0  19    4.48    0.54
  -9   0  19    4.75    0.56
 -13   1   2   -0.04    0.26
 -12   1   1   -0.27    0.22
 -11   1   0    4.29    0.49
 -10   1  -1    5.17    0.51
  -9   1  -2    0.78    0.28
  -8   1  -3   14.89    0.66
   8  -1   3   14.21    0.55
   8  -1   3   14.87    0.66
   7  -1   4    5.64    0.37
   7  -1   4    5.75    0.46
  -6   1  -5    0.09    0.09
   6  -1   5    0.20    0.18
   6  -1   5    0.31    0.25
  -5   1  -6    0.81    0.13
   5  -1   6    0.97    0.30
   5  -1   6    0.67    0.21
  -4   1  -7    5.74    0.27
   4  -1   7    5.69    0.36
   4  -1   7    6.08    0.49
  -3   1  -8    2.89    0.23
   3  -1   8    2.80    0.26
   3  -1   8    2.40    0.38
   2  -1   9    2.02    0.22
   2  -1   9    1.71    0.39
   1  -1  10    0.43    0.34
   1  -1  10    0.03    0.14
   0  -1  11    8.58    0.59
   0  -1  11    7.42    0.35
  -1  -1  12    3.42    0.28
  -1  -1  12    3.07    0.39
  -2  -1  13    0.73    0.28
  -2  -1  13    0.75    0.19
  -3  -1  14    9.07    0.46
  -3  -1  14    8.68    0.53
  -4  -1  15    0.96    0.22
  -4  -1  15    0.75    0.26
  -5  -1  16    2.73    0.35
  -5  -1  16    2.59    0.38
  -6  -1  17    3.64    0.43
  -6  -1  17    3.92    0.47
  -7  -1  18    7.36    0.55
  -7  -1  18    6.13    0.55
  -8  -1  19    2.18    0.39
  -8  -1  19    1.41    0.36
 -13   2   1    0.53    0.34
 -12   2   0    4.70    0.55
 -11   2  -1    7.56    0.57
  11  -2   1    8.29    0.61
 -10   2  -2    0.46    0.26
  10  -2   2    0.53    0.29
   9  -2   3    0.88    0.31
   8  -2   4    0.20    0.17
   8  -2   4   -0.01    0.24
  -7   2  -5    2.37    0.20
   7  -2   5    2.35    0.38
   7  -2   5    3.05    0.29
  -6   2  -6    0.22    0.11
   6  -2   6   -0.06    0.17
   6  -2   6   -0.40    0.27
  -5   2  -7    6.17    0.29
   5  -2   7    5.86    0.53
   5  -2   7    6.61    0.36
  -4   2  -8   12.58    0.40
   4  -2   8   12.76    0.44
   4  -2   8   12.88    0.68
  -3   2  -9   11.83    0.42
   3  -2   9   13.08    0.41
   3  -2   9   12.15    0.70
   2  -2  10    3.46    0.24
   2  -2  10    3.27    0.46
   1  -2  11    3.35    0.46
   1  -2  11    3.29    0.23
   0  -2  12    6.97    0.53
   0  -2  12    7.83    0.34
  -1  -2  13   11.56    0.43
  -1  -2  13   11.03    0.62
  -2  -2  14    7.64    0.51
  -2  -2  14    6.97    0.37
  -3  -2  15    3.41    0.41
  -3  -2  15    3.37    0.33
  -4  -2  16   -0.05    0.15
  -4  -2  16   -0.13    0.22
  -5  -2  17    1.83    0.36
  -5  -2  17    2.34    0.33
  -6  -2  18    3.53    0.47
  -6  -2  18    2.53    0.36
  -7  -2  19    1.32    0.37
  -7  -2  19    1.72    0.34
  -8  -2  20    0.57    0.32
  -8  -2  20    0.76    0.30
 -13   3   0    4.49    0.57
  13  -3   0    5.04    0.57
  12  -3   1    3.50    0.48
  11  -3   2    1.73    0.37
  10  -3   3    0.33    0.27
   9  -3   4    0.03    0.24
   9  -3   4    0.43    0.18
   8  -3   5    2.24    0.36
   8  -3   5    2.45    0.25
  -7   3  -6    4.49    0.28
   7  -3   6    4.55    0.31
   7  -3   6    4.25    0.46
  -6   3  -7    3.72    0.26
   6  -3   7    3.26    0.42
   6  -3   7    4.15    0.31
  -5   3  -8    0.75    0.16
   5  -3   8    0.78    0.36
  -4   3  -9    1.37    0.19
   4  -3   9    1.39    0.38
  -3   3 -10    1.60    0.21
   3  -3  10    1.54    0.43
  -2   3 -11    0.62    0.18
   2  -3  11    0.56    0.35
   1  -3  12   -0.07    0.34
   1  -3  12    0.05    0.09
   0  -3  13   12.27    0.64
   0  -3  13   13.03    0.41
  -1  -3  14    7.09    0.34
  -1  -3  14    7.89    0.53
  -2  -3  15   15.31    0.70
  -2  -3  15   15.82    0.55
  -3  -3  16    0.04    0.15
  -3  -3  16   -0.24    0.23
  -4  -3  17    2.02    0.29
  -4  -3  17    2.00    0.36
  -5  -3  18    3.36    0.38
  -5  -3  18    2.74    0.43
  -6  -3  19    5.96    0.61
  -6  -3  19    6.32    0.50
  -7  -3  20    0.72    0.34
  -7  -3  20    0.30    0.25
  13  -4   1    0.35    0.33
  12  -4   2    2.64    0.45
  11  -4   3    0.12    0.28
  10  -4   4    1.96    0.39
   9  -4   5    1.17    0.32
  -8   4  -6   18.68    0.55
   8  -4   6   18.90    0.80
  -7   4  -7    0.86    0.17
   7  -4   7    1.01    0.33
  -6   4  -8   48.20    0.95
   6  -4   8   48.94    1.30
  -5   4  -9    1.48    0.21
   5  -4   9    1.45    0.41
  -4   4 -10    4.30    0.32
   4  -4  10    4.64    0.57
  -3   4 -11    0.49    0.17
   3  -4  11    0.38    0.40
  -2   4 -12   -0.08    0.13
   2  -4  12    0.39    0.37
   1  -4  13   10.43    0.63
   0  -4  14    0.00    0.28
  -1  -4  15    7.00    0.55
  -2  -4  16    0.04    0.25
  -3  -4  17   -0.22    0.23
  -4  -4  18    0.22    0.27
  -5  -4  19    0.66    0.32
  -6  -4  20    1.56    0.39
  13  -5   2    2.08    0.45
  12  -5   3    0.33    0.32
  11  -5   4    0.02    0.28
  10  -5   5   -0.15    0.25
  -9   5  -6    2.99    0.28
   9  -5   6    2.66    0.44
  -8   5  -7    0.37    0.17
   8  -5   7    0.59    0.33
  -7   5  -8    0.04    0.13
   7  -5   8    0.12    0.31
  -6   5  -9    1.16    0.20
   6  -5   9    1.04    0.38
  -5   5 -10    2.88    0.28
   5  -5  10    1.84    0.45
  -4   5 -11    0.43    0.16
   4  -5  11    0.37    0.37
  -3   5 -12    3.29    0.31
   3  -5  12    2.82    0.50
  -2   5 -13    8.94    0.48
   2  -5  13   11.27    0.67
  -1   5 -14    0.22    0.17
   1  -5  14    0.40    0.32
   0  -5  15   13.66    0.70
  -1  -5  16   -0.23    0.26
  -2  -5  17   -0.09    0.25
  -3  -5  18   -0.14    0.23
  -4  -5  19    0.30    0.28
  -5  -5  20    0.75    0.35
  -6  -5  21    0.97    0.38
  13  -6   3    1.07    0.39
  12  -6   4    2.40    0.46
  11  -6   5    1.04    0.37
  10  -6   6    0.04    0.27
  -9   6  -7    0.14    0.15
   9  -6   7    0.20    0.31
  -8   6  -8    0.30    0.17
   8  -6   8    0.23    0.35
  -7   6  -9    4.10    0.34
   7  -6   9    3.72    0.51
  -6   6 -10   -0.20    0.12
   6  -6  10   -0.15    0.37
  -5   6 -11    0.81    0.20
   5  -6  11    1.01    0.42
  -4   6 -12    3.14    0.32
   4  -6  12    2.03    0.47
  -3   6 -13    2.27    0.29
   3  -6  13    1.88    0.44
  -2   6 -14    0.34    0.19
   2  -6  14    0.49    0.32
  -1   6 -15    1.31    0.26
   1  -6  15    1.00    0.36
   0   6 -16    0.09    0.16
   0  -6  16    0.26    0.29
   1   6 -17    4.05    0.42
  -1  -6  17    4.37    0.52
  -2  -6  18    4.76    0.55
  -3  -6  19   -0.28    0.27
  -4  -6  20   -0.27    0.26
  -5  -6  21    0.18    0.30
  13  -7   4    1.03    0.40
  12  -7   5    0.19    0.34
  11  -7   6    6.25    0.63
 -10   7  -7    5.70    0.41
  10  -7   7    5.70    0.61
  -9   7  -8    0.45    0.18
   9  -7   8    1.04    0.42
  -8   7  -9    1.92    0.28
   8  -7   9    2.58    0.51
  -7   7 -10    4.28    0.37
   7  -7  10    4.28    0.59
  -6   7 -11   10.26    0.51
   6  -7  11    9.99    0.77
  -5   7 -12    0.55    0.20
   5  -7  12    0.67    0.43
  -4   7 -13    0.49    0.18
   4  -7  13   -0.05    0.34
  -3   7 -14    0.17    0.18
   3  -7  14    0.09    0.31
  -2   7 -15    3.20    0.36
   2  -7  15    3.35    0.49
  -1   7 -16    0.71    0.22
   1  -7  16    0.71    0.35
   0   7 -17    3.38    0.39
   0  -7  17    3.34    0.49
   1   7 -18    1.85    0.32
  -1  -7  18    1.68    0.39
   2   7 -19    0.22    0.22
  -2  -7  19    0.60    0.31
   3   7 -20    1.19    0.30
  -3  -7  20    0.65    0.35
   4   7 -21    1.76    0.36
  -4  -7  21    1.75    0.44
  13  -8   5    0.24    0.39
  12  -8   6    0.25    0.39
  11  -8   7    6.16    0.66
 -10   8  -8    9.50    0.53
  10  -8   8    8.90    0.75
  -9   8  -9    0.01    0.18
   9  -8   9    0.16    0.42
  -8   8 -10    2.47    0.32
   8  -8  10    2.78    0.54
  -7   8 -11   11.98    0.57
   7  -8  11   12.07    0.84
  -6   8 -12    5.43    0.42
   6  -8  12    5.54    0.64
  -5   8 -13    0.59    0.21
   5  -8  13    0.24    0.37
  -4   8 -14    2.47    0.34
   4  -8  14    1.47    0.42
  -3   8 -15    4.94    0.44
   3  -8  15    4.53    0.53
  -2   8 -16    0.30    0.21
   2  -8  16    0.45    0.33
  -1   8 -17    3.45    0.40
   1  -8  17    3.17    0.50
   0   8 -18   14.18    0.69
   0  -8  18   13.22    0.77
   1   8 -19   13.67    0.71
  -1  -8  19   14.85    0.86
   2   8 -20    1.15    0.32
  -2  -8  20    0.79    0.37
   3   8 -21    4.83    0.52
  -3  -8  21    5.92    0.65
  12  -9   7    2.62    0.56
 -11   9  -8    4.77    0.46
  11  -9   8    4.11    0.63
 -10   9  -9    6.61    0.47
  10  -9   9    7.05    0.75
  -9   9 -10    4.50    0.43
   9  -9  10    4.03    0.62
  -8   9 -11   -0.03    0.18
   8  -9  11   -0.21    0.42
  -7   9 -12    9.24    0.54
   7  -9  12    8.63    0.77
  -6   9 -13    1.24    0.27
   6  -9  13    1.12    0.43
  -5   9 -14    4.16    0.43
   5  -9  14    3.80    0.53
  -4   9 -15    2.66    0.36
   4  -9  15    2.86    0.50
  -3   9 -16    1.59    0.30
   3  -9  16    1.54    0.44
  -2   9 -17   -0.01    0.20
   2  -9  17   -0.38    0.31
  -1   9 -18    6.19    0.54
   1  -9  18    6.38    0.63
   0   9 -19   14.68    0.74
   0  -9  19   14.61    0.86
   1   9 -20   -0.03    0.22
  -1  -9  20    0.51    0.36
 -11  10  -9    6.84    0.51
  11 -10   9    5.76    0.72
 -10  10 -10   10.74    0.61
  10 -10  10   11.08    0.88
  -9  10 -11    1.67    0.32
   9 -10  11    0.36    0.49
  -8  10 -12   16.24    0.74
   8 -10  12   16.75    0.99
  -7  10 -13    4.68    0.46
   7 -10  13    5.05    0.66
  -6  10 -14    2.22    0.36
   6 -10  14    1.82    0.50
  -5  10 -15    1.59    0.31
   5 -10  15    0.92    0.44
  -4  10 -16    4.61    0.48
   4 -10  16    3.75    0.56
  -3  10 -17    5.28    0.52
   3 -10  17    5.69    0.61
  -2  10 -18    4.95    0.49
   2 -10  18    4.63    0.60
  -1  10 -19   12.15    0.70
   1 -10  19   11.21    0.76
   0  10 -20    7.49    0.59
   0 -10  20    8.90    0.74
 -10  11 -11    1.48    0.32
  10 -11  11    0.69    0.51
  -9  11 -12    0.25    0.24
   9 -11  12   -0.57    0.46
  -8  11 -13    4.84    0.51
   8 -11  13    3.38    0.62
  -7  11 -14   10.47    0.64
   7 -11  14   10.65    0.83
  -6  11 -15    1.16    0.31
   6 -11  15   -0.32    0.40
  -5  11 -16    5.92    0.55
   5 -11  16    6.60    0.69
  -4  11 -17    9.88    0.64
   4 -11  17   10.38    0.78
  -3  11 -18    0.51    0.27
   3 -11  18    1.03    0.43
  -2  11 -19    7.62    0.59
   2 -11  19    7.46    0.72
  -9  12 -13    3.56    0.47
   9 -12  13    2.09    0.59
  -8  12 -14    5.56    0.56
   8 -12  14    4.07    0.63
  -7  12 -15    0.49    0.26
   7 -12  15   -0.38    0.40
  -6  12 -16    1.40    0.33
   6 -12  16    1.47    0.49
  -5  12 -17    0.41    0.27
   5 -12  17    0.10    0.40
  -4  12 -18    0.30    0.25
   4 -12  18    0.62    0.43
   0  15  -4   -0.50    0.40
  -1  15  -3   -0.17    0.39
  -2  15  -2   -0.69    0.36
  -3  15  -1    1.41    0.46
  -4  15   0    1.26    0.29
  -4  15   0    1.59    0.46
  -5  15   1    0.11    0.23
  -5  15   1    0.02    0.33
  -6  15   2    2.76    0.38
  -6  15   2    2.53    0.48
  -7  15   3    3.13    0.52
  -7  15   3    3.63    0.45
   2  14  -5    1.72    0.53
   1  14  -4    1.53    0.49
   0  14  -3    0.33    0.42
  -1  14  -2   -0.31    0.33
  -2  14  -1   -0.16    0.36
  -3  14   0    0.14    0.35
  -3  14   0   -0.18    0.16
  -4  14   1    0.06    0.32
  -4  14   1    0.39    0.23
  -5  14   2    0.44    0.22
  -5  14   2   -0.26    0.30
  -6  14   3   -0.02    0.29
  -6  14   3    0.27    0.24
  -7  14   4   -0.09    0.28
  -7  14   4    0.17    0.23
  -8  14   5    1.04    0.37
   4  13  -6    0.37    0.45
   3  13  -5    0.02    0.40
   2  13  -4    0.34    0.42
   1  13  -3    0.18    0.41
   0  13  -2    0.35    0.41
  -1  13  -1    1.61    0.46
  -2  13   0    0.45    0.19
  -2  13   0   -0.08    0.34
  -3  13   1   -0.04    0.18
  -3  13   1   -0.11    0.32
  -4  13   2    0.49    0.20
  -4  13   2   -0.23    0.29
  -5  13   3    0.03    0.20
  -5  13   3   -0.01    0.29
  -6  13   4    0.82    0.26
  -6  13   4    0.57    0.33
  -7  13   5    1.65    0.39
  -7  13   5    1.13    0.29
  -8  13   6    0.61    0.32
  -9  13   7   -0.19    0.27
   5  12  -6   -0.39    0.36
   4  12  -5    5.56    0.66
   3  12  -4    0.43    0.36
   2  12  -3   -0.54    0.33
   1  12  -2    0.96    0.41
   0  12  -1    2.11    0.45
  -1  12   0   -0.32    0.32
  -2  12   1    0.34    0.18
  -2  12   1   -0.02    0.33
  -3  12   2    3.03    0.48
  -3  12   2    2.24    0.30
  -4  12   3    0.96    0.34
  -4  12   3    1.44    0.26
  -5  12   4    1.21    0.35
  -5  12   4    1.39    0.27
  -6  12   5   -0.11    0.26
  -6  12   5    0.17    0.21
  -7  12   6    2.30    0.43
  -8  12   7    0.11    0.24
  -9  12   8    0.25    0.26
  -6 -11   6    0.86    0.32
   6  11  -6    0.71    0.39
  -5 -11   5    0.25    0.26
   5  11  -5    0.40    0.38
  -4 -11   4    1.89    0.32
   4  11  -4    1.37    0.40
   3  11  -3   -0.31    0.29
   2  11  -2    1.06    0.40
   1  11  -1    7.56    0.67
   0  11   0    1.62    0.41
  -1  11   1    2.12    0.42
  -1  11   1    2.01    0.24
  -2  11   2    0.04    0.15
  -2  11   2   -0.21    0.27
  -3  11   3    0.75    0.20
  -3  11   3    0.67    0.31
  -4  11   4    3.69    0.36
  -4  11   4    3.89    0.48
  -5  11   5    0.49    0.21
  -5  11   5    0.18    0.24
  -6  11   6    2.04    0.40
  -7  11   7    0.45    0.30
  -8  11   8    3.67    0.50
  -9  11   9    2.32    0.44
 -10  11  10    1.49    0.38
  -7 -10   6    0.62    0.29
   7  10  -6    0.01    0.34
  -6 -10   5    2.17    0.38
   6  10  -5    1.56    0.42
  -5 -10   4    0.64    0.26
   5  10  -4    0.82    0.35
  -4 -10   3    0.76    0.26
   4  10  -3    0.05    0.31
  -3 -10   2    4.19    0.40
   3  10  -2    4.24    0.53
   2  10  -1   20.17    0.91
   1  10   0   11.78    0.74
   0  10   1    0.33    0.33
  -1  10   2    0.08    0.13
  -1  10   2   -0.48    0.28
  -2  10   3    0.31    0.15
  -2  10   3    0.10    0.29
  -3  10   4    0.55    0.31
  -3  10   4    0.97    0.21
  -4  10   5    0.11    0.17
  -4  10   5    0.47    0.26
  -5  10   6    1.14    0.33
  -6  10   7    0.64    0.30
  -7  10   8    0.94    0.32
  -8  10   9    7.83    0.62
  -9  10  10    1.52    0.37
 -10  10  11    1.62    0.38
  -8  -9   6    0.72    0.31
   8   9  -6    0.53    0.38
  -7  -9   5    4.28    0.49
   7   9  -5    3.27    0.49
  -6  -9   4    1.80    0.36
   6   9  -4    1.77    0.42
  -5  -9   3    2.31    0.34
   5   9  -3    2.25    0.44
  -4  -9   2    0.31    0.21
   4   9  -2    0.35    0.32
  -3  -9   1    9.40    0.50
   3   9  -1    9.54    0.68
  -2  -9   0    4.71    0.35
   2   9   0    4.41    0.52
   1   9   1    4.31    0.51
   0   9   2    4.10    0.28
   0   9   2    3.66    0.46
  -1   9   3   15.09    0.50
  -1   9   3   15.09    0.77
  -2   9   4    0.66    0.18
  -2   9   4    0.47    0.31
  -3   9   5    2.76    0.40
  -4   9   6    9.52    0.59
  -5   9   7    2.61    0.40
  -6   9   8    5.87    0.50
  -7   9   9    4.55    0.50
  -8   9  10   32.99    1.16
  -9   9  11    8.17    0.62
 -10   9  12    0.29    0.28
  -9  -8   6    3.42    0.50
   9   8  -6    3.35    0.51
  -8  -8   5    0.52    0.30
   8   8  -5    1.09    0.38
  -7  -8   4   13.51    0.73
   7   8  -4   13.39    0.79
  -6  -8   3    0.73    0.26
   6   8  -3    1.44    0.36
  -5  -8   2    0.45    0.23
   5   8  -2    0.42    0.30
  -4  -8   1    7.62    0.47
   4   8  -1    7.57    0.61
  -3  -8   0    4.14    0.37
   3   8   0    4.14    0.48
  -2  -8  -1    7.70    0.41
   2   8   1    8.23    0.57
  -1  -8  -2   -0.17    0.14
   1   8   2    0.37    0.32
   0   8   3   12.74    0.68
   0   8   3   12.74    0.41
  -1   8   4    0.35    0.31
  -2   8   5    0.97    0.32
  -3   8   6    5.09    0.50
  -4   8   7   33.79    1.04
  -5   8   8    1.61    0.32
  -6   8   9    0.10    0.23
  -7   8  10    6.44    0.54
  -8   8  11   16.41    0.83
  -9   8  12    2.62    0.42
 -10   8  13    0.44    0.28
 -10  -7   6    7.94    0.68
  10   7  -6    7.85    0.69
  -9  -7   5   -0.28    0.24
   9   7  -5    0.03    0.29
  -8  -7   4    7.77    0.59
   8   7  -4    8.41    0.66
  -7  -7   3    0.25    0.25
   7   7  -3   -0.05    0.26
  -6  -7   2    5.23    0.46
   6   7  -2    4.50    0.49
  -5  -7   1    3.08    0.36
   5   7  -1    3.45    0.44
  -4  -7   0   12.74    0.57
   4   7   0   13.69    0.68
  -3  -7  -1   23.15    0.72
   3   7   1   23.05    0.85
  -2  -7  -2    7.15    0.39
   2   7   2    5.45    0.50
  -1  -7  -3   13.35    0.48
   1   7   3   13.50    0.73
   1   7   3   13.27    0.49
   0   7   4   52.99    1.31
   0   7   4   53.35    0.97
  -1   7   5   14.07    0.69
  -2   7   6    7.78    0.57
  -3   7   7   23.23    0.83
  -4   7   8    5.32    0.45
  -5   7   9    1.20    0.29
  -6   7  10    0.50    0.25
  -7   7  11    3.07    0.42
  -8   7  12    3.84    0.47
  -9   7  13    0.07    0.24
 -10   7  14    0.64    0.29
 -10  -6   5    4.54    0.56
  10   6  -5    3.79    0.52
  -9  -6   4    1.09    0.34
   9   6  -4    0.19    0.30
  -8  -6   3    1.43    0.35
   8   6  -3    2.24    0.41
  -7  -6   2    9.72    0.60
   7   6  -2    8.98    0.63
  -6  -6   1   12.11    0.62
   6   6  -1   11.21    0.63
  -5  -6   0    0.16    0.19
   5   6   0   -0.02    0.24
  -4  -6  -1   15.57    0.61
   4   6   1   15.84    0.73
  -3  -6  -2   15.85    0.58
   3   6   2   15.92    0.75
  -2  -6  -3    4.83    0.36
   2   6   3    3.70    0.45
   1   6   4    0.00    0.18
   1   6   4   -0.08    0.30
   0   6   5   13.28    0.48
   0   6   5   14.59    0.71
  -1   6   6   21.87    0.83
  -1   6   6   20.30    0.61
  -2   6   7    0.16    0.24
  -3   6   8   16.26    0.68
  -4   6   9   30.18    0.96
  -5   6  10    0.93    0.28
  -6   6  11   12.27    0.66
  -7   6  12    2.30    0.38
  -8   6  13    1.17    0.32
  -9   6  14    2.76    0.43
 -10   6  15    1.53    0.35
 -11  -5   5   16.89    0.91
  11   5  -5   16.95    0.91
 -10  -5   4    3.53    0.49
  10   5  -4    2.76    0.47
  -9  -5   3    0.19    0.25
   9   5  -3    0.73    0.32
  -8  -5   2    4.86    0.50
   8   5  -2    4.68    0.50
  -7  -5   1   14.65    0.68
   7   5  -1   13.64    0.69
  -6  -5   0    0.30    0.22
   6   5   0    0.31    0.25
  -5  -5  -1    8.50    0.49
   5   5   1    9.41    0.58
  -4  -5  -2   40.44    0.99
   4   5   2   40.31    1.09
  -3  -5  -3    0.14    0.17
   3   5   3    0.53    0.29
   2   5   4    3.41    0.40
   2   5   4    3.81    0.33
   1   5   5    3.19    0.30
   1   5   5    2.82    0.38
   0   5   6   57.71    1.08
   0   5   6   56.29    1.28
  -1   5   7    0.75    0.25
  -1   5   7    0.70    0.28
  -2   5   8   21.16    0.75
  -2   5   8   21.91    0.61
  -3   5   9    2.70    0.37
  -3   5   9    2.87    0.26
  -4   5  10    0.75    0.26
  -5   5  11    0.00    0.20
  -6   5  12    0.82    0.27
  -7   5  13   12.13    0.67
  -8   5  14    1.42    0.33
  -9   5  15    5.17    0.55
 -10   5  16    2.28    0.42
 -11  -4   4    9.90    0.72
  11   4  -4    9.71    0.70
 -10  -4   3    0.40    0.28
  10   4  -3   -0.01    0.26
  -9  -4   2   -0.07    0.25
   9   4  -2    0.56    0.29
  -8  -4   1    1.67    0.33
   8   4  -1    1.60    0.34
  -7  -4   0    2.50    0.35
   7   4   0    1.96    0.33
  -6  -4  -1   -0.05    0.19
   6   4   1    0.15    0.24
  -5  -4  -2    5.84    0.43
   5   4   2    7.00    0.53
  -4  -4  -3    4.15    0.37
   4   4   3    3.62    0.40
  -3  -4  -4    0.04    0.16
   3   4   4    0.03    0.25
   3   4   4   -0.09    0.19
   2   4   5   13.66    0.65
   2   4   5   14.52    0.54
   1   4   6   70.59    1.27
   1   4   6   68.40    1.40
   0   4   7    0.16    0.24
   0   4   7    0.61    0.26
  -1   4   8    1.63    0.30
  -1   4   8    1.23    0.29
  -2   4   9   26.45    0.83
  -2   4   9   26.16    0.69
  -3   4  10    2.62    0.33
  -3   4  10    2.11    0.26
  -4   4  11    5.56    0.37
  -4   4  11    6.56    0.45
  -5   4  12    2.58    0.28
  -5   4  12    2.42    0.35
  -6   4  13   11.40    0.62
  -7   4  14    2.26    0.38
  -8   4  15    1.48    0.33
  -9   4  16    1.93    0.39
 -10   4  17    0.48    0.29
 -12  -3   4    0.71    0.33
  12   3  -4    1.76    0.39
 -11  -3   3    0.29    0.28
  11   3  -3   -0.01    0.25
 -10  -3   2    1.94    0.38
  10   3  -2    2.60    0.40
  -9  -3   1    0.07    0.24
   9   3  -1    0.15    0.24
  -8  -3   0    5.24    0.46
   8   3   0    5.67    0.49
  -7  -3  -1   -0.09    0.19
   7   3   1    0.09    0.21
  -6  -3  -2    8.60    0.52
   6   3   2    8.71    0.51
  -5  -3  -3   27.03    0.81
   5   3   3   26.74    0.84
  -4  -3  -4    0.44    0.22
   4   3   4    0.16    0.22
   4   3   4    0.43    0.27
   3   3   5    0.23    0.22
   3   3   5    0.54    0.26
   2   3   6   24.21    0.78
   2   3   6   24.39    0.71
   1   3   7    0.55    0.27
   1   3   7    0.35    0.26
   0   3   8   -0.20    0.26
   0   3   8    0.31    0.21
  -1   3   9    1.07    0.26
  -1   3   9    1.45    0.30
  -2   3  10    6.02    0.44
  -2   3  10    5.97    0.44
  -3   3  11    6.79    0.41
  -3   3  11    6.45    0.43
  -4   3  12    0.94    0.25
  -4   3  12    0.88    0.22
  -5   3  13    0.86    0.26
  -5   3  13    0.66    0.22
  -6   3  14    1.62    0.32
  -6   3  14    1.69    0.29
  -7   3  15    4.10    0.46
  -8   3  16    0.67    0.27
  -9   3  17    0.96    0.33
 -12  -2   3    0.06    0.27
  12   2  -3    0.63    0.31
 -11  -2   2    0.78    0.29
  11   2  -2    0.60    0.29
 -10  -2   1    1.06    0.32
  10   2  -1    0.30    0.27
  -9  -2   0    0.16    0.23
   9   2   0    0.63    0.27
  -8  -2  -1    5.02    0.45
   8   2   1    5.89    0.44
  -7  -2  -2    0.33    0.23
   7   2   2    0.49    0.25
  -6  -2  -3    7.84    0.50
   6   2   3    8.22    0.51
  -5  -2  -4    0.63    0.24
   5   2   4    0.20    0.23
   5   2   4    0.17    0.24
   4   2   5    3.62    0.37
   4   2   5    2.94    0.33
   3   2   6    3.29    0.35
   3   2   6    3.47    0.36
   2   2   7    5.33    0.44
   2   2   7    5.63    0.44
   1   2   8    5.86    0.44
   1   2   8    5.13    0.43
   0   2   9    1.19    0.25
   0   2   9    1.15    0.32
  -1   2  10    0.27    0.27
  -1   2  10   -0.05    0.18
  -2   2  11    6.94    0.48
  -2   2  11    6.72    0.44
  -3   2  12    2.26    0.31
  -3   2  12    2.35    0.31
  -4   2  13    0.10    0.18
  -4   2  13   -0.07    0.19
  -5   2  14    0.47    0.22
  -5   2  14    0.50    0.23
  -6   2  15    1.88    0.32
  -6   2  15    1.98    0.33
  -7   2  16    0.29    0.22
  -7   2  16   -0.17    0.20
  -8   2  17    0.81    0.29
  -9   2  18   -0.07    0.21
 -12  -1   2    1.59    0.40
  12   1  -2    1.85    0.38
 -11  -1   1    0.11    0.26
  11   1  -1    0.12    0.25
 -10  -1   0    0.14    0.23
  10   1   0   -0.26    0.20
  -9  -1  -1   -0.02    0.21
   9   1   1    0.61    0.25
  -8  -1  -2    6.78    0.49
   8   1   2    7.37    0.48
  -7  -1  -3    0.16    0.22
   7   1   3    0.29    0.22
  -6  -1  -4    0.24    0.22
   6   1   4    0.10    0.23
   6   1   4    0.12    0.23
   5   1   5   -0.17    0.23
   5   1   5   -0.04    0.23
  -4  -1  -6    3.02    0.17
   4   1   6    2.08    0.32
   4   1   6    3.21    0.34
   3   1   7    7.01    0.50
   3   1   7    7.95    0.49
   2   1   8   13.85    0.56
   2   1   8   13.18    0.62
   1   1   9   15.80    0.58
   1   1   9   14.90    0.69
   0   1  10    0.28    0.31
   0   1  10    0.02    0.18
  -1   1  11   22.70    0.78
  -1   1  11   24.88    0.72
  -2   1  12   19.88    0.70
  -2   1  12   20.16    0.68
  -3   1  13    0.01    0.21
  -3   1  13    0.42    0.19
  -4   1  14   15.69    0.65
  -4   1  14   16.14    0.68
  -5   1  15    0.22    0.19
  -5   1  15   -0.18    0.18
  -6   1  16   -0.22    0.20
  -6   1  16    0.00    0.17
  -7   1  17    0.10    0.23
  -7   1  17    0.06    0.21
  -8   1  18    0.26    0.27
  -8   1  18    0.56    0.27
  -9   1  19    0.42    0.28
 -13   0   2   -0.02    0.29
 -12   0   1    0.76    0.32
 -11   0   0   -0.16    0.24
  11   0   0    0.41    0.25
 -10   0  -1    0.43    0.26
  10   0   1    0.31    0.24
  -9   0  -2    5.99    0.49
   9   0   2    6.52    0.45
  -8   0  -3    7.37    0.50
   8   0   3    7.27    0.45
   8   0   3    6.14    0.48
   7   0   4    3.30    0.40
   7   0   4    3.77    0.36
   6   0   5   10.69    0.49
   6   0   5   10.37    0.59
  -5   0  -6    0.14    0.09
   5   0   6    0.19    0.22
   5   0   6   -0.17    0.26
  -4   0  -7   14.43    0.38
   4   0   7   14.15    0.65
   4   0   7   14.36    0.55
   3   0   8   -0.38    0.25
   3   0   8    0.09    0.20
   2   0   9    0.35    0.20
   2   0   9    0.50    0.34
   1   0  10   19.77    0.80
   1   0  10   20.49    0.60
   0   0  11    9.35    0.63
   0   0  11   10.13    0.45
  -1   0  12   23.17    0.68
  -1   0  12   23.60    0.80
  -2   0  13    4.04    0.41
  -2   0  13    4.52    0.36
  -3   0  14    1.06    0.28
  -3   0  14    0.76    0.23
  -4   0  15    7.77    0.47
  -4   0  15    5.78    0.47
  -5   0  16    0.06    0.18
  -5   0  16   -0.21    0.21
  -6   0  17    0.24    0.25
  -6   0  17    0.28    0.22
  -7   0  18    5.36    0.54
  -7   0  18    5.94    0.57
  -8   0  19    7.98    0.61
  -8   0  19    7.53    0.63
 -13   1   1    0.27    0.33
 -12   1   0    0.00    0.26
 -11   1  -1    0.99    0.35
  11  -1   1    0.58    0.26
 -10   1  -2    2.73    0.41
  10  -1   2    3.17    0.44
  10  -1   2    3.09    0.36
  -9   1  -3   12.38    0.66
   9  -1   3   14.06    0.69
   9  -1   3   13.48    0.57
   8  -1   4    0.03    0.25
   8  -1   4    0.29    0.19
   7  -1   5   16.18    0.69
   7  -1   5   15.35    0.56
   6  -1   6   24.22    0.83
   6  -1   6   23.59    0.68
  -5   1  -7   14.21    0.40
   5  -1   7   14.90    0.55
   5  -1   7   13.92    0.67
  -4   1  -8   27.20    0.60
   4  -1   8   29.66    0.71
   4  -1   8   28.48    0.89
  -3   1  -9    0.69    0.15
   3  -1   9    0.93    0.22
   3  -1   9    0.19    0.31
   2  -1  10    3.19    0.44
   2  -1  10    3.69    0.30
   1  -1  11    0.44    0.36
   1  -1  11    0.13    0.14
   0  -1  12   20.38    0.79
   0  -1  12   20.38    0.59
  -1  -1  13    5.50    0.46
  -1  -1  13    4.54    0.33
  -2  -1  14    1.74    0.25
  -2  -1  14    1.86    0.34
  -3  -1  15    7.30    0.52
  -3  -1  15    5.96    0.40
  -4  -1  16    0.05    0.17
  -4  -1  16    0.09    0.24
  -5  -1  17    0.12    0.24
  -5  -1  17    0.13    0.19
  -6  -1  18    5.96    0.49
  -6  -1  18    5.56    0.56
  -7  -1  19    4.28    0.52
  -7  -1  19    5.46    0.55
  -8  -1  20    0.71    0.30
  -8  -1  20    0.52    0.32
 -13   2   0    0.92    0.39
  13  -2   0    2.07    0.44
 -12   2  -1    2.63    0.46
  12  -2   1    2.86    0.46
  11  -2   2    1.96    0.31
  11  -2   2    2.05    0.40
  10  -2   3    3.17    0.35
  10  -2   3    2.81    0.42
   9  -2   4    2.45    0.40
   9  -2   4    2.80    0.31
   8  -2   5    2.21    0.37
   8  -2   5    2.31    0.28
   7  -2   6    9.17    0.43
   7  -2   6    9.62    0.57
  -6   2  -7    1.79    0.18
   6  -2   7    1.24    0.36
   6  -2   7    1.68    0.26
  -5   2  -8    2.51    0.22
   5  -2   8    2.26    0.41
   5  -2   8    2.76    0.28
  -4   2  -9    5.60    0.31
   4  -2   9    5.13    0.51
   4  -2   9    5.32    0.37
  -3   2 -10   41.44    0.85
   3  -2  10   41.79    1.21
   3  -2  10   41.75    0.79
   2  -2  11    0.09    0.12
   2  -2  11    0.65    0.39
   1  -2  12   32.06    0.70
   1  -2  12   33.21    1.03
   0  -2  13   36.35    1.05
   0  -2  13   38.25    0.82
  -1  -2  14    2.90    0.27
  -1  -2  14    2.76    0.40
  -2  -2  15   27.45    0.75
  -2  -2  15   27.27    0.93
  -3  -2  16    1.29    0.24
  -3  -2  16    1.19    0.31
  -4  -2  17    0.91    0.23
  -4  -2  17    0.62    0.29
  -5  -2  18    0.36    0.28
  -5  -2  18    0.78    0.25
  -6  -2  19    9.52    0.68
  -6  -2  19    9.87    0.60
  -7  -2  20    7.79    0.58
  -7  -2  20    7.36    0.64
  13  -3   1    0.41    0.34
  12  -3   2    2.05    0.43
  11  -3   3   10.36    0.68
  10  -3   4    0.53    0.31
   9  -3   5    1.32    0.36
   8  -3   6   16.02    0.76
  -7   3  -7   16.11    0.48
   7  -3   7   15.40    0.75
  -6   3  -8   25.40    0.62
   6  -3   8   26.98    0.96
  -5   3  -9   23.14    0.61
   5  -3   9   23.14    0.92
  -4   3 -10    5.62    0.33
   4  -3  10    5.33    0.59
  -3   3 -11    0.56    0.17
   3  -3  11    0.90    0.39
   2  -3  12    1.46    0.44
   1  -3  13   12.94    0.74
   0  -3  14   32.71    1.03
  -1  -3  15    0.07    0.24
  -2  -3  16   12.31    0.69
  -3  -3  17    1.92    0.27
  -3  -3  17    1.64    0.37
  -4  -3  18    0.10    0.17
  -4  -3  18   -0.46    0.22
  -5  -3  19    4.38    0.52
  -6  -3  20    6.06    0.63
  13  -4   2    1.28    0.39
  12  -4   3   10.17    0.69
  11  -4   4    7.09    0.61
  10  -4   5    0.31    0.30
   9  -4   6    7.49    0.61
  -8   4  -7   24.15    0.65
   8  -4   7   24.40    0.94
  -7   4  -8    0.11    0.13
   7  -4   8   -0.23    0.30
  -6   4  -9   43.23    0.90
   6  -4   9   41.81    1.22
  -5   4 -10   58.26    1.11
   5  -4  10   54.07    1.44
  -4   4 -11   12.06    0.49
   4  -4  11   12.70    0.80
  -3   4 -12    2.93    0.30
   3  -4  12    3.01    0.50
  -2   4 -13   16.65    0.60
   2  -4  13   14.35    0.75
   1  -4  14   57.83    1.42
   0  -4  15   -0.10    0.29
  -1  -4  16    7.86    0.57
  -2  -4  17    5.66    0.56
  -3  -4  18   -0.15    0.25
  -4  -4  19    3.18    0.46
  -5  -4  20   -0.03    0.25
  -6  -4  21    8.92    0.72
  13  -5   3    8.80    0.71
  12  -5   4    2.27    0.46
  11  -5   5    0.91    0.36
  10  -5   6    3.36    0.49
   9  -5   7   28.30    1.02
  -8   5  -8    3.99    0.32
   8  -5   8    3.98    0.50
  -7   5  -9    0.04    0.14
   7  -5   9   -0.59    0.29
  -6   5 -10   26.51    0.72
   6  -5  10   25.78    1.05
  -5   5 -11   23.17    0.70
   5  -5  11   25.90    1.01
  -4   5 -12    5.00    0.36
   4  -5  12    4.70    0.59
  -3   5 -13    0.05    0.15
   3  -5  13    0.17    0.35
  -2   5 -14    5.18    0.39
   2  -5  14    4.69    0.52
  -1   5 -15    2.30    0.31
   1  -5  15    2.69    0.42
   0  -5  16   -0.28    0.28
  -1  -5  17    2.74    0.42
  -2  -5  18    7.11    0.60
  -3  -5  19    2.15    0.42
  -4  -5  20    5.72    0.60
  -5  -5  21   12.00    0.81
  13  -6   4   12.99    0.83
  12  -6   5    1.42    0.42
  11  -6   6    0.90    0.38
  10  -6   7    3.29    0.50
  -9   6  -8   12.74    0.54
   9  -6   8   12.34    0.75
  -8   6  -9    0.10    0.16
   8  -6   9   -0.26    0.36
  -7   6 -10   13.85    0.55
   7  -6  10   15.34    0.89
  -6   6 -11   34.78    0.89
   6  -6  11   34.76    1.20
   5  -6  12    0.80    0.40
  -4   6 -13    0.62    0.20
   4  -6  13    0.83    0.42
  -3   6 -14    0.10    0.17
   3  -6  14   -0.19    0.36
  -2   6 -15    0.70    0.21
   2  -6  15    0.58    0.37
  -1   6 -16    0.37    0.20
   1  -6  16    1.02    0.37
   0   6 -17    1.31    0.28
   0  -6  17    1.54    0.40
   1   6 -18   12.04    0.62
  -1  -6  18   11.17    0.70
  -2  -6  19    0.96    0.36
  -3  -6  20    4.15    0.56
  -4  -6  21    7.00    0.63
  13  -7   5    3.59    0.54
  12  -7   6   -0.03    0.37
  11  -7   7    0.41    0.40
  10  -7   8    0.47    0.36
  -9   7  -9    1.94    0.28
   9  -7   9    2.39    0.50
  -8   7 -10    0.09    0.16
   8  -7  10   -0.35    0.40
  -7   7 -11    1.03    0.23
   7  -7  11    1.08    0.47
  -6   7 -12    0.20    0.18
   6  -7  12    0.03    0.42
  -5   7 -13    0.08    0.17
   5  -7  13    0.10    0.41
  -4   7 -14    2.91    0.34
   4  -7  14    3.19    0.54
  -3   7 -15    3.56    0.37
   3  -7  15    3.57    0.52
  -2   7 -16    0.69    0.23
   2  -7  16    0.71    0.35
  -1   7 -17   -0.19    0.14
   1  -7  17   -0.04    0.28
   0   7 -18    1.51    0.31
   0  -7  18    0.90    0.36
   1   7 -19    1.48    0.31
  -1  -7  19    1.51    0.40
   2   7 -20    0.25    0.24
  -2  -7  20    0.11    0.31
   3   7 -21    1.30    0.32
  -3  -7  21    1.20    0.41
  12  -8   7    1.18    0.47
  11  -8   8    2.18    0.54
 -10   8  -9   -0.19    0.17
  10  -8   9   -0.13    0.38
  -9   8 -10    0.10    0.19
   9  -8  10    0.06    0.44
  -8   8 -11    0.69    0.23
   8  -8  11   -0.02    0.44
  -7   8 -12    4.37    0.41
   7  -8  12    4.32    0.63
  -6   8 -13    0.55    0.21
   6  -8  13    0.23    0.43
  -5   8 -14   -0.06    0.15
   5  -8  14   -0.36    0.37
  -4   8 -15   -0.08    0.16
   4  -8  15   -0.60    0.33
  -3   8 -16    0.11    0.18
   3  -8  16    0.02    0.34
  -2   8 -17   -0.22    0.16
   2  -8  17   -0.40    0.29
  -1   8 -18    3.47    0.41
   1  -8  18    3.45    0.53
   0   8 -19    0.29    0.23
   0  -8  19   -0.05    0.32
   1   8 -20    0.72    0.28
  -1  -8  20    0.66    0.38
   2   8 -21   -0.25    0.19
  -2  -8  21    0.34    0.35
  12  -9   8    0.78    0.51
  11  -9   9    1.09    0.52
 -10   9 -10    0.35    0.21
  10  -9  10   -0.02    0.47
  -9   9 -11    0.37    0.21
   9  -9  11   -0.33    0.46
  -8   9 -12    0.12    0.20
   8  -9  12   -0.09    0.45
  -7   9 -13   -0.10    0.17
   7  -9  13   -0.01    0.42
  -6   9 -14    0.42    0.22
   6  -9  14    0.28    0.45
  -5   9 -15    0.16    0.20
   5  -9  15    0.29    0.37
  -4   9 -16    1.10    0.27
   4  -9  16    0.46    0.40
  -3   9 -17   -0.02    0.20
   3  -9  17    0.09    0.37
  -2   9 -18   -0.01    0.20
   2  -9  18   -0.46    0.33
  -1   9 -19    0.22    0.24
   1  -9  19    0.00    0.36
   0   9 -20    0.14    0.21
   0  -9  20   -0.29    0.28
   1   9 -21   -0.04    0.22
  -1  -9  21    0.24    0.35
  11 -10  10   -0.22    0.49
 -10  10 -11    0.47    0.26
  10 -10  11    0.05    0.49
  -9  10 -12   -0.11    0.18
   9 -10  12   -0.18    0.47
  -8  10 -13   -0.15    0.19
   8 -10  13   -0.74    0.44
  -7  10 -14    4.26    0.47
   7 -10  14    4.15    0.65
  -6  10 -15    3.94    0.44
   6 -10  15    3.89    0.60
  -5  10 -16    0.76    0.26
   5 -10  16    0.84    0.45
  -4  10 -17    4.11    0.47
   4 -10  17    3.72    0.60
  -3  10 -18    3.29    0.44
   3 -10  18    3.50    0.57
  -2  10 -19    0.72    0.28
   2 -10  19    0.40    0.40
  -1  10 -20    0.61    0.28
   1 -10  20    0.65    0.40
 -10  11 -12    0.02    0.22
  10 -11  12   -0.48    0.49
  -9  11 -13    2.14    0.37
   9 -11  13    1.28    0.57
  -8  11 -14    0.02    0.24
   8 -11  14   -0.40    0.46
  -7  11 -15    9.09    0.62
   7 -11  15    7.80    0.78
  -6  11 -16   -0.05    0.22
   6 -11  16   -0.24    0.41
  -5  11 -17    0.74    0.29
   5 -11  17   -0.19    0.41
  -4  11 -18    0.81    0.29
   4 -11  18    0.94    0.43
  -3  11 -19    1.70    0.36
   3 -11  19    0.90    0.45
   0  15  -3   -0.37    0.40
  -1  15  -2    0.21    0.44
  -2  15  -1   -0.27    0.39
  -3  15   0    0.62    0.42
  -4  15   1    6.23    0.69
  -5  15   2    3.19    0.40
  -5  15   2    3.42    0.54
  -6  15   3    2.86    0.41
  -6  15   3    2.59    0.50
   2  14  -4    0.09    0.44
   1  14  -3   -0.41    0.39
   0  14  -2    3.23    0.60
  -1  14  -1   15.83    0.96
  -2  14   0   -0.08    0.39
  -3  14   1   10.26    0.79
  -4  14   2   11.48    0.79
  -4  14   2   10.62    0.57
  -5  14   3    1.61    0.43
  -5  14   3    2.00    0.34
  -6  14   4    4.36    0.57
  -6  14   4    4.41    0.46
  -7  14   5   -0.05    0.29
   4  13  -5   11.42    0.84
   3  13  -4   14.13    0.90
   2  13  -3    0.38    0.40
   1  13  -2    2.89    0.53
   0  13  -1   11.15    0.83
  -1  13   0    0.46    0.40
  -2  13   1    3.96    0.57
  -3  13   2   14.79    0.61
  -3  13   2   15.69    0.88
  -4  13   3    8.48    0.69
  -4  13   3    7.73    0.49
  -5  13   4    1.69    0.31
  -5  13   4    1.57    0.40
  -6  13   5    3.74    0.53
  -7  13   6    7.11    0.68
  -8  13   7    0.27    0.30
   5  12  -5    4.19    0.62
   4  12  -4   15.93    0.96
   3  12  -3    1.42    0.44
   2  12  -2    4.31    0.59
   1  12  -1    3.57    0.53
   0  12   0    0.77    0.41
  -1  12   1   -0.17    0.33
  -2  12   2    3.65    0.34
  -2  12   2    3.88    0.55
  -3  12   3   10.32    0.73
  -3  12   3   10.64    0.52
  -4  12   4   -0.02    0.28
  -4  12   4    0.04    0.17
  -5  12   5    5.67    0.59
  -6  12   6    7.37    0.60
  -7  12   7    1.26    0.38
  -8  12   8    0.17    0.25
  -9  12   9    2.95    0.50
  -6 -11   5    1.05    0.33
   6  11  -5    1.45    0.45
  -5 -11   4    4.54    0.49
   5  11  -4    5.30    0.65
   4  11  -3    2.02    0.49
   3  11  -2    0.75    0.41
   2  11  -1    5.04    0.60
   1  11   0   -0.16    0.31
   0  11   1    0.48    0.37
  -1  11   2    0.95    0.39
  -2  11   3   12.21    0.77
  -2  11   3   11.04    0.49
  -3  11   4    2.60    0.30
  -3  11   4    2.82    0.44
  -4  11   5    0.42    0.30
  -5  11   6    4.71    0.52
  -6  11   7    1.82    0.38
  -7  11   8    0.67    0.29
  -8  11   9    0.10    0.26
  -9  11  10    9.14    0.70
  -7 -10   5    0.11    0.26
   7  10  -5    0.00    0.38
  -6 -10   4    1.68    0.37
   6  10  -4    2.06    0.48
  -5 -10   3    2.98    0.40
   5  10  -3    2.25    0.48
  -4 -10   2    0.20    0.22
   4  10  -2   -0.19    0.30
   3  10  -1    0.87    0.40
   2  10   0    0.09    0.34
   1  10   1    0.02    0.34
   0  10   2   -0.30    0.32
  -1  10   3    4.62    0.32
  -1  10   3    5.21    0.55
  -2  10   4   -0.05    0.30
  -2  10   4   -0.09    0.15
  -3  10   5    5.49    0.56
  -4  10   6   -0.13    0.24
  -5  10   7    0.39    0.28
  -6  10   8    0.44    0.26
  -7  10   9    3.57    0.48
  -8  10  10    1.06    0.35
  -9  10  11    1.08    0.35
  -8  -9   5    1.16    0.36
   8   9  -5    1.39    0.44
  -7  -9   4    2.83    0.44
   7   9  -4    2.99    0.52
  -6  -9   3    0.55    0.28
   6   9  -3    0.20    0.31
  -5  -9   2    0.22    0.23
   5   9  -2    0.45    0.35
  -4  -9   1    0.23    0.20
   4   9  -1    0.09    0.32
  -3  -9   0    2.08    0.30
   3   9   0    2.06    0.42
  -2  -9  -1    0.34    0.19
   2   9   1    0.37    0.31
   1   9   2    0.56    0.32
   0   9   3   -0.04    0.28
  -1   9   4    2.20    0.40
  -2   9   5    0.33    0.29
  -3   9   6    6.58    0.53
  -4   9   7    0.16    0.25
  -5   9   8    2.35    0.39
  -6   9   9    3.83    0.48
  -7   9  10    0.29    0.26
  -8   9  11    4.81    0.55
  -9   9  12    3.58    0.50
 -10   9  13   -0.01    0.23
  -9  -8   5    0.59    0.32
   9   8  -5    0.59    0.39
  -8  -8   4    0.25    0.28
   8   8  -4   -0.03    0.32
  -7  -8   3    0.48    0.28
   7   8  -3    1.03    0.38
  -6  -8   2    0.16    0.23
   6   8  -2    0.22    0.32
  -5  -8   1    1.40    0.29
   5   8  -1    1.40    0.38
  -4  -8   0    1.57    0.28
   4   8   0    1.17    0.38
  -3  -8  -1   10.47    0.52
   3   8   1    9.41    0.66
  -2  -8  -2    5.69    0.38
   2   8   2    4.32    0.48
   1   8   3    2.18    0.25
   1   8   3    1.69    0.38
   0   8   4    0.61    0.30
  -1   8   5    0.69    0.30
  -2   8   6    3.14    0.43
  -3   8   7    0.20    0.24
  -4   8   8   -0.15    0.20
  -5   8   9    0.24    0.22
  -6   8  10    0.15    0.21
  -7   8  11   -0.02    0.21
  -8   8  12    6.69    0.58
  -9   8  13    1.85    0.38
 -10   8  14    0.23    0.24
  -9  -7   4    0.53    0.31
   9   7  -4    0.83    0.35
  -8  -7   3   -0.13    0.25
   8   7  -3   -0.04    0.31
  -7  -7   2    1.91    0.35
   7   7  -2    2.38    0.41
  -6  -7   1    2.80    0.37
   6   7  -1    2.34    0.40
  -5  -7   0    2.67    0.35
   5   7   0    2.16    0.39
  -4  -7  -1    0.26    0.20
   4   7   1    0.08    0.31
  -3  -7  -2    3.38    0.34
   3   7   2    4.28    0.49
  -2  -7  -3   17.67    0.60
   2   7   3   17.06    0.79
   1   7   4   17.32    0.80
   1   7   4   18.03    0.57
   0   7   5    0.59    0.34
   0   7   5    0.64    0.21
  -1   7   6   26.43    0.95
  -2   7   7    0.22    0.24
  -3   7   8    0.57    0.27
  -4   7   9    0.08    0.22
  -5   7  10    0.62    0.27
  -6   7  11    0.15    0.21
  -7   7  12    0.45    0.25
  -8   7  13    5.65    0.58
  -9   7  14    2.42    0.45
 -10   7  15    0.11    0.25
 -10  -6   4    0.89    0.35
  10   6  -4    1.61    0.43
  -9  -6   3   -0.03    0.24
   9   6  -3    0.05    0.28
  -8  -6   2    0.10    0.26
   8   6  -2    0.66    0.31
  -7  -6   1    9.28    0.61
   7   6  -1   10.35    0.68
  -6  -6   0    6.22    0.49
   6   6   0    6.31    0.56
  -5  -6  -1   -0.26    0.17
   5   6   1   -0.20    0.25
  -4  -6  -2    7.37    0.45
   4   6   2    7.24    0.58
  -3  -6  -3   27.00    0.79
   3   6   3   28.29    0.96
   2   6   4    0.11    0.31
   2   6   4   -0.09    0.20
   1   6   5   12.66    0.50
   1   6   5   11.31    0.64
   0   6   6   11.31    0.51
   0   6   6   11.86    0.68
  -1   6   7    5.93    0.46
  -1   6   7    5.29    0.49
  -2   6   8    4.78    0.47
  -3   6   9    0.48    0.25
  -4   6  10    2.70    0.37
  -5   6  11   -0.16    0.20
  -6   6  12    0.77    0.26
  -7   6  13    3.30    0.45
  -8   6  14   11.01    0.72
  -9   6  15    0.14    0.22
 -10   6  16    0.19    0.25
 -11  -5   4    6.20    0.67
  11   5  -4    8.32    0.69
 -10  -5   3    1.17    0.35
  10   5  -3    1.22    0.38
  -9  -5   2   -0.07    0.23
   9   5  -2   -0.27    0.23
  -8  -5   1    2.89    0.42
   8   5  -1    3.44    0.46
  -7  -5   0   25.78    0.92
   7   5   0   26.35    0.96
  -6  -5  -1    0.32    0.23
   6   5   1    0.59    0.30
  -5  -5  -2    7.30    0.47
   5   5   2    6.93    0.52
  -4  -5  -3    7.13    0.45
   4   5   3    7.58    0.57
  -3  -5  -4    4.30    0.37
   3   5   4    3.80    0.44
   3   5   4    3.84    0.36
   2   5   5    0.71    0.25
   2   5   5    0.56    0.34
   1   5   6    0.00    0.22
   1   5   6    0.31    0.29
   0   5   7   34.23    1.01
   0   5   7   35.76    0.87
  -1   5   8    1.56    0.33
  -1   5   8    1.11    0.29
  -2   5   9   28.00    0.89
  -2   5   9   29.11    0.72
  -3   5  10    9.94    0.57
  -4   5  11    1.84    0.31
  -5   5  12    1.07    0.30
  -6   5  13    3.02    0.42
  -7   5  14   11.12    0.66
  -8   5  15    2.08    0.39
  -9   5  16    0.33    0.27
 -11  -4   3    3.03    0.50
  11   4  -3    3.24    0.50
 -10  -4   2    0.11    0.25
  10   4  -2    0.30    0.30
  -9  -4   1    2.64    0.42
   9   4  -1    2.55    0.40
  -8  -4   0    9.16    0.60
   8   4   0    8.30    0.57
  -7  -4  -1    7.70    0.54
   7   4   1    8.13    0.57
  -6  -4  -2    2.28    0.34
   6   4   2    2.06    0.34
  -5  -4  -3   18.67    0.71
   5   4   3   19.70    0.77
  -4  -4  -4    9.68    0.52
   4   4   4    9.84    0.51
   4   4   4    9.54    0.60
   3   4   5    0.54    0.31
   3   4   5    0.44    0.24
   2   4   6   17.99    0.73
   2   4   6   16.31    0.61
   1   4   7    5.58    0.46
   1   4   7    4.63    0.44
   0   4   8    1.37    0.30
   0   4   8    1.79    0.34
  -1   4   9    5.65    0.47
  -1   4   9    5.65    0.49
  -2   4  10   18.39    0.72
  -2   4  10   18.74    0.63
  -3   4  11   48.02    1.00
  -3   4  11   44.35    1.15
  -4   4  12    1.54    0.30
  -4   4  12    1.15    0.24
  -5   4  13    4.41    0.46
  -6   4  14   22.17    0.88
  -7   4  15    4.12    0.48
  -8   4  16    2.93    0.45
  -9   4  17    4.53    0.53
 -12  -3   3    3.24    0.50
  12   3  -3    3.40    0.50
 -11  -3   2    1.08    0.36
  11   3  -2    1.30    0.36
 -10  -3   1    3.65    0.48
  10   3  -1    3.49    0.45
  -9  -3   0   17.76    0.81
   9   3   0   18.68    0.81
  -8  -3  -1    7.24    0.54
   8   3   1    7.49    0.54
  -7  -3  -2   -0.14    0.17
   7   3   2    0.00    0.25
  -6  -3  -3   28.40    0.90
   6   3   3   25.92    0.85
  -5  -3  -4   26.94    0.83
   5   3   4   26.27    0.81
   5   3   4   28.45    0.88
   4   3   5    0.88    0.32
   4   3   5    0.78    0.27
   3   3   6   10.31    0.54
   3   3   6   10.61    0.59
   2   3   7   13.58    0.64
   2   3   7   14.73    0.60
   1   3   8   49.20    1.16
   1   3   8   48.53    1.11
   0   3   9    0.25    0.24
   0   3   9    0.45    0.32
  -1   3  10   25.58    0.81
  -1   3  10   24.35    0.79
  -2   3  11   42.31    0.99
  -2   3  11   41.77    1.07
  -3   3  12    0.52    0.23
  -3   3  12    0.43    0.21
  -4   3  13    2.62    0.36
  -4   3  13    2.07    0.30
  -5   3  14   27.39    0.83
  -5   3  14   26.61    0.94
  -6   3  15    7.12    0.55
  -7   3  16    5.85    0.51
  -8   3  17    5.60    0.58
  -9   3  18    2.72    0.45
 -12  -2   2    3.34    0.51
  12   2  -2    3.60    0.48
 -11  -2   1    0.47    0.31
  11   2  -1    0.90    0.32
 -10  -2   0    1.72    0.38
  10   2   0    1.99    0.36
  -9  -2  -1   18.30    0.83
   9   2   1   17.79    0.76
  -8  -2  -2    2.66    0.38
   8   2   2    3.40    0.41
  -7  -2  -3    5.82    0.45
   7   2   3    4.63    0.43
  -6  -2  -4   14.02    0.65
   6   2   4   13.51    0.62
   6   2   4   12.68    0.62
   5   2   5   13.53    0.62
   5   2   5   13.26    0.60
   4   2   6    0.29    0.27
   4   2   6    0.33    0.27
   3   2   7   17.95    0.68
   3   2   7   17.47    0.66
   2   2   8   39.82    1.01
   2   2   8   39.18    0.99
   1   2   9   -0.27    0.29
   1   2   9    0.22    0.23
   0   2  10   11.91    0.54
   0   2  10   12.27    0.64
  -1   2  11   29.57    0.90
  -1   2  11   30.62    0.85
  -2   2  12   11.36    0.55
  -2   2  12   12.25    0.56
  -3   2  13   -0.16    0.16
  -3   2  13    0.09    0.20
  -4   2  14    4.57    0.44
  -4   2  14    4.13    0.40
  -5   2  15   18.91    0.74
  -5   2  15   19.14    0.80
  -6   2  16    0.66    0.25
  -6   2  16    0.29    0.23
  -7   2  17    1.23    0.31
  -8   2  18   11.61    0.70
 -12  -1   1    0.77    0.36
  12   1  -1    1.03    0.33
 -11  -1   0   -0.05    0.23
  11   1   0    0.88    0.30
 -10  -1  -1    3.27    0.45
  10   1   1    3.88    0.44
  -9  -1  -2   14.40    0.74
   9   1   2   13.59    0.64
  -8  -1  -3    0.26    0.25
   8   1   3    0.71    0.28
   8   1   3    0.35    0.24
  -7  -1  -4    8.38    0.55
   7   1   4    8.24    0.49
   7   1   4    7.14    0.52
   6   1   5   19.71    0.76
   6   1   5   19.92    0.70
   5   1   6   16.82    0.66
   5   1   6   17.49    0.72
  -4  -1  -7    3.87    0.21
   4   1   7    3.94    0.39
   4   1   7    3.06    0.37
   3   1   8   33.54    0.88
   3   1   8   32.33    0.95
   2   1   9   21.65    0.82
   2   1   9   21.67    0.71
   1   1  10    2.98    0.43
   1   1  10    3.01    0.33
   0   1  11   17.33    0.75
   0   1  11   15.11    0.58
  -1   1  12   12.57    0.63
  -1   1  12   12.37    0.54
  -2   1  13    0.01    0.24
  -2   1  13    0.36    0.19
  -3   1  14    0.55    0.26
  -3   1  14    1.03    0.25
  -4   1  15   20.44    0.77
  -5   1  16    7.26    0.51
  -5   1  16    6.65    0.48
  -6   1  17   -0.15    0.16
  -6   1  17    0.02    0.22
  -7   1  18   10.35    0.64
  -7   1  18    9.86    0.65
  -8   1  19    0.95    0.31
 -13   0   1    6.40    0.66
  13   0  -1    7.02    0.58
 -12   0   0    1.05    0.37
  12   0   0    1.20    0.32
 -11   0  -1    1.07    0.35
  11   0   1    1.60    0.33
 -10   0  -2    6.45    0.54
  10   0   2    5.55    0.46
  10   0   2    6.35    0.54
  -9   0  -3    0.31    0.28
   9   0   3    1.01    0.27
   9   0   3    0.61    0.29
   8   0   4    2.11    0.32
   8   0   4    2.58    0.39
   7   0   5    7.58    0.47
   7   0   5    8.17    0.56
   6   0   6    6.78    0.46
   6   0   6    6.06    0.49
   5   0   7    2.96    0.33
   5   0   7    1.86    0.37
  -4   0  -8    2.14    0.18
   4   0   8    2.23    0.39
   4   0   8    1.73    0.30
   3   0   9   38.55    0.90
   3   0   9   37.09    1.05
   2   0  10   16.12    0.79
   2   0  10   16.36    0.58
   1   0  11    2.94    0.30
   1   0  11    3.36    0.44
   0   0  12   12.69    0.50
   0   0  12   11.72    0.68
  -1   0  13    6.82    0.40
  -1   0  13    6.75    0.53
  -2   0  14   23.28    0.82
  -2   0  14   24.27    0.76
  -3   0  15    6.11    0.46
  -3   0  15    4.74    0.41
  -4   0  16   28.08    0.95
  -4   0  16   27.76    0.89
  -5   0  17   -0.01    0.18
  -5   0  17   -0.31    0.20
  -6   0  18   -0.14    0.22
  -6   0  18    0.06    0.21
  -7   0  19    2.37    0.43
  -7   0  19    2.24    0.39
  -8   0  20    0.69    0.29
  -8   0  20    0.55    0.31
 -13   1   0    0.20    0.31
  13  -1   0    0.12    0.31
  13  -1   0    0.68    0.28
 -12   1  -1   -0.18    0.29
  12  -1   1    0.77    0.28
  12  -1   1    0.54    0.33
 -11   1  -2    3.37    0.50
  11  -1   2    4.02    0.49
  11  -1   2    4.54    0.45
  10  -1   3    3.44    0.39
  10  -1   3    2.32    0.40
   9  -1   4    0.28    0.21
   9  -1   4    0.16    0.28
   8  -1   5   12.88    0.67
   8  -1   5   13.20    0.57
   7  -1   6   20.94    0.67
   7  -1   6   21.76    0.84
   6  -1   7    1.86    0.29
   6  -1   7    1.92    0.38
  -5   1  -8    1.00    0.15
   5  -1   8    0.99    0.26
   5  -1   8    1.00    0.35
  -4   1  -9    6.37    0.31
   4  -1   9    7.13    0.45
   4  -1   9    6.81    0.61
  -3   1 -10    0.46    0.14
   3  -1  10    0.34    0.20
   3  -1  10   -0.30    0.33
   2  -1  11   -0.03    0.34
   2  -1  11    0.18    0.17
   1  -1  12   -0.04    0.14
   1  -1  12    0.30    0.37
   0  -1  13    4.67    0.50
   0  -1  13    5.70    0.35
  -1  -1  14    0.06    0.15
  -1  -1  14   -0.03    0.26
  -2  -1  15    6.19    0.40
  -2  -1  15    6.13    0.51
  -3  -1  16    6.74    0.53
  -3  -1  16    7.24    0.45
  -4  -1  17    0.76    0.22
  -4  -1  17    1.23    0.32
  -5  -1  18    0.35    0.21
  -5  -1  18    0.17    0.25
  -6  -1  19    0.15    0.22
  -6  -1  19   -0.29    0.24
  -7  -1  20    0.67    0.33
  -7  -1  20    0.71    0.27
  13  -2   1    0.76    0.34
  12  -2   2    0.30    0.32
  11  -2   3    1.16    0.35
  10  -2   4    1.26    0.36
   9  -2   5    0.39    0.31
   8  -2   6   17.78    0.78
   7  -2   7   -0.09    0.25
  -6   2  -8   -0.06    0.10
   6  -2   8    0.24    0.31
  -5   2  -9    0.00    0.12
   5  -2   9    0.34    0.33
  -4   2 -10    3.72    0.29
   4  -2  10    4.11    0.51
  -3   2 -11    0.44    0.15
   3  -2  11    0.52    0.38
   2  -2  12    2.01    0.46
   1  -2  13   10.41    0.65
   1  -2  13   10.37    0.40
   0  -2  14   -0.01    0.13
   0  -2  14    0.47    0.29
  -1  -2  15   10.61    0.45
  -1  -2  15    9.03    0.58
  -2  -2  16    0.34    0.26
  -2  -2  16    0.41    0.17
  -3  -2  17   -0.06    0.24
  -3  -2  17    0.24    0.19
  -4  -2  18    4.51    0.43
  -4  -2  18    5.10    0.54
  -5  -2  19    2.81    0.37
  -5  -2  19    2.19    0.41
  -6  -2  20    1.70    0.41
  -6  -2  20    2.13    0.36
  13  -3   2    1.95    0.45
  12  -3   3    0.15    0.31
  11  -3   4    4.62    0.54
  10  -3   5    0.26    0.30
   9  -3   6    1.95    0.39
   8  -3   7    0.04    0.26
   7  -3   8   14.73    0.76
  -6   3  -9   -0.09    0.11
   6  -3   9    0.18    0.34
  -5   3 -10   13.79    0.49
   5  -3  10   13.52    0.75
  -4   3 -11   15.11    0.53
   4  -3  11   15.91    0.87
  -3   3 -12    6.89    0.39
   3  -3  12    8.10    0.65
  -2   3 -13    0.71    0.19
   2  -3  13    1.08    0.38
   1  -3  14    0.92    0.37
   0  -3  15    9.85    0.65
  -1  -3  16    0.37    0.29
  -2  -3  17    1.00    0.31
  -3  -3  18    6.87    0.58
  -4  -3  19    0.79    0.34
  -5  -3  20    0.27    0.27
  -6  -3  21    0.64    0.35
  13  -4   3    0.30    0.33
  12  -4   4    6.11    0.64
  11  -4   5    2.49    0.46
  10  -4   6    0.01    0.28
   9  -4   7    0.89    0.36
   8  -4   8    0.39    0.34
  -7   4  -9    2.83    0.26
   7  -4   9    2.65    0.48
  -6   4 -10    5.54    0.35
   6  -4  10    6.43    0.63
  -5   4 -11    4.01    0.33
   5  -4  11    4.33    0.55
  -4   4 -12   20.26    0.65
   4  -4  12   19.42    0.90
  -3   4 -13    8.03    0.44
   3  -4  13    8.21    0.66
  -2   4 -14    3.09    0.32
   2  -4  14    3.14    0.47
   1  -4  15   52.77    1.39
   0  -4  16    8.19    0.63
  -1  -4  17    1.75    0.38
  -2  -4  18    5.17    0.55
  -3  -4  19    0.95    0.33
  -4  -4  20    0.34    0.30
[truncated: 98,156 more chars]
