# Supplementary material for: Living Polymerization of Propylene with ansa-Dimethylsilylene(fluorenyl)(cumylamido) Titanium Complexes
Source: Polymers (Basel). 2017 Apr 5;9(4):131. doi: 10.3390/polym9040131 (PMC6432314; doi:10.3390/polym9040131)
Supplement: Supplementary file 1 [file polymers-09-00131-s001.zip › 2a(CCDC 1540563).cif]

data_dm16699
_audit_creation_date              2016-10-27
_audit_creation_method
;
Olex2 1.2
(compiled 2016.09.09 svn.r3337 for OlexSys, GUI svn.r5227)
;
_publ_contact_author_address      ?
_publ_contact_author_email        ?
_publ_contact_author_id_orcid     ?
_publ_contact_author_name         ''
_publ_contact_author_phone        ?
_publ_section_references
;
Dolomanov, O.V., Bourhis, L.J., Gildea, R.J, Howard, J.A.K. & Puschmann, H.
 (2009), J. Appl. Cryst. 42, 339-341.

Sheldrick, G.M. (2008). Acta Cryst. A64, 112-122.

Sheldrick, G.M. (2015). Acta Cryst. C71, 3-8.
;
_chemical_name_common             ?
_chemical_name_systematic         ?
_chemical_formula_moiety          'C30 H33 N Si Ti'
_chemical_formula_sum             'C30 H33 N Si Ti'
_chemical_formula_weight          483.56
_chemical_melting_point           ?
loop_
  _atom_type_symbol
  _atom_type_description
  _atom_type_scat_dispersion_real
  _atom_type_scat_dispersion_imag
  _atom_type_scat_source
 'C' 'C' 0.0033 0.0016 'International Tables Vol C Tables 4.2.6.8 and 6.1.1.4'
 'H' 'H' 0.0000 0.0000 'International Tables Vol C Tables 4.2.6.8 and 6.1.1.4'
 'N' 'N' 0.0061 0.0033 'International Tables Vol C Tables 4.2.6.8 and 6.1.1.4'
 'Si' 'Si' 0.0817 0.0704 'International Tables Vol C Tables 4.2.6.8 and 6.1.1.4'
 'Ti' 'Ti' 0.2776 0.4457 'International Tables Vol C Tables 4.2.6.8 and 6.1.1.4'

_shelx_space_group_comment
;
The symmetry employed for this shelxl refinement is uniquely defined
by the following loop, which should always be used as a source of
symmetry information in preference to the above space-group names.
They are only intended as comments.
;
_space_group_crystal_system       'monoclinic'
_space_group_IT_number            14
_space_group_name_H-M_alt         'P 1 21/c 1'
_space_group_name_Hall            '-P 2ybc'
loop_
  _space_group_symop_operation_xyz
 'x, y, z'
 '-x, y+1/2, -z+1/2'
 '-x, -y, -z'
 'x, -y-1/2, z-1/2'

_cell_length_a                    12.742(3)
_cell_length_b                    17.562(4)
_cell_length_c                    11.404(2)
_cell_angle_alpha                 90
_cell_angle_beta                  95.269(4)
_cell_angle_gamma                 90
_cell_volume                      2541.1(9)
_cell_formula_units_Z             4
_cell_measurement_reflns_used     4212
_cell_measurement_temperature     130
_cell_measurement_theta_max       28.43
_cell_measurement_theta_min       2.32
_shelx_estimated_absorpt_T_max    0.953
_shelx_estimated_absorpt_T_min    0.924
_exptl_absorpt_coefficient_mu     0.402
_exptl_absorpt_correction_T_max   0.7461
_exptl_absorpt_correction_T_min   0.6498
_exptl_absorpt_correction_type    multi-scan
_exptl_absorpt_process_details
;
SADABS-2008/1 (Bruker,2008) was used for absorption correction.
wR2(int) was 0.0546 before and 0.0416 after correction.
The Ratio of minimum to maximum transmission is 0.8709.
The \l/2 correction factor is 0.0015.
;
_exptl_absorpt_special_details    ?
_exptl_crystal_colour             'yellow'
_exptl_crystal_density_diffrn     1.264
_exptl_crystal_density_meas       .
_exptl_crystal_density_method     ?
_exptl_crystal_description        'block'
_exptl_crystal_F_000              1024
_exptl_crystal_size_max           0.2
_exptl_crystal_size_mid           0.15
_exptl_crystal_size_min           0.12
_exptl_transmission_factor_max    ?
_exptl_transmission_factor_min    ?
_diffrn_reflns_av_R_equivalents   0.0610
_diffrn_reflns_av_unetI/netI      0.0717
_diffrn_reflns_Laue_measured_fraction_full 1.000
_diffrn_reflns_Laue_measured_fraction_max 0.995
_diffrn_reflns_limit_h_max        18
_diffrn_reflns_limit_h_min        -17
_diffrn_reflns_limit_k_max        25
_diffrn_reflns_limit_k_min        -25
_diffrn_reflns_limit_l_max        16
_diffrn_reflns_limit_l_min        -13
_diffrn_reflns_number             25451
_diffrn_reflns_point_group_measured_fraction_full 1.000
_diffrn_reflns_point_group_measured_fraction_max 0.995
_diffrn_reflns_theta_full         26.000
_diffrn_reflns_theta_max          30.772
_diffrn_reflns_theta_min          1.980
_diffrn_ambient_temperature       130
_diffrn_detector_area_resol_mean  ?
_diffrn_measured_fraction_theta_full 1.000
_diffrn_measured_fraction_theta_max 0.995
_diffrn_measurement_device_type   'Bruker APEX-II CCD'
_diffrn_measurement_method        '\f and \w scans'
_diffrn_radiation_monochromator   'graphite'
_diffrn_radiation_type            MoK\a
_diffrn_radiation_wavelength      0.71073
_diffrn_source                    ?
_diffrn_standards_number          0
_reflns_Friedel_coverage          0.000
_reflns_Friedel_fraction_full     .
_reflns_Friedel_fraction_max      .
_reflns_number_gt                 4845
_reflns_number_total              7920
_reflns_special_details
;
 Reflections were merged by SHELXL according to the crystal
 class for the calculation of statistics and refinement.
 
 _reflns_Friedel_fraction is defined as the number of unique
 Friedel pairs measured divided by the number that would be
 possible theoretically, ignoring centric projections and
 systematic absences.
;
_reflns_threshold_expression      'I > 2\s(I)'
_computing_cell_refinement        'SAINT v7.68A (Bruker, 2009)'
_computing_data_collection        ?
_computing_data_reduction         'SAINT v7.68A (Bruker, 2009)'
_computing_molecular_graphics     'Olex2 (Dolomanov et al., 2009)'
_computing_publication_material   'Olex2 (Dolomanov et al., 2009)'
_computing_structure_refinement   'ShelXL (Sheldrick, 2015)'
_computing_structure_solution     'ShelXS (Sheldrick, 2008)'
_refine_diff_density_max          0.442
_refine_diff_density_min          -0.747
_refine_diff_density_rms          0.068
_refine_ls_extinction_coef        .
_refine_ls_extinction_method      none
_refine_ls_goodness_of_fit_ref    1.006
_refine_ls_hydrogen_treatment     constr
_refine_ls_matrix_type            full
_refine_ls_number_parameters      304
_refine_ls_number_reflns          7920
_refine_ls_number_restraints      0
_refine_ls_R_factor_all           0.1020
_refine_ls_R_factor_gt            0.0455
_refine_ls_restrained_S_all       1.006
_refine_ls_shift/su_max           0.001
_refine_ls_shift/su_mean          0.000
_refine_ls_structure_factor_coef  Fsqd
_refine_ls_weighting_details
'w=1/[\s^2^(Fo^2^)+(0.0612P)^2^] where P=(Fo^2^+2Fc^2^)/3'
_refine_ls_weighting_scheme       calc
_refine_ls_wR_factor_gt           0.1040
_refine_ls_wR_factor_ref          0.1301
_refine_special_details           ?
_olex2_refinement_description
;
1. Fixed Uiso
 At 1.2 times of:
  All C(H) groups
 At 1.5 times of:
  All C(H,H,H) groups
2.a Aromatic/amide H refined with riding coordinates:
 C4(H4), C5(H5), C6(H6), C7(H7), C10(H10), C11(H11), C12(H12), C13(H13),
 C23(H23), C24(H24), C25(H25), C26(H26), C28(H28), C29(H29), C30(H30)
2.b Idealised Me refined as rotating group:
 C14(H14A,H14B,H14C), C15(H15A,H15B,H15C), C16(H16A,H16B,H16C), C17(H17A,H17B,
 H17C), C19(H19A,H19B,H19C), C20(H20A,H20B,H20C)
;
_atom_sites_solution_hydrogens    geom
_atom_sites_solution_primary      direct
_atom_sites_solution_secondary    ?
loop_
  _atom_site_label
  _atom_site_type_symbol
  _atom_site_fract_x
  _atom_site_fract_y
  _atom_site_fract_z
  _atom_site_U_iso_or_equiv
  _atom_site_adp_type
  _atom_site_occupancy
  _atom_site_site_symmetry_order
  _atom_site_calc_flag
  _atom_site_refinement_flags_posn
  _atom_site_refinement_flags_adp
  _atom_site_refinement_flags_occupancy
  _atom_site_disorder_assembly
  _atom_site_disorder_group
 Ti1 Ti 0.25028(3) 0.09719(2) 0.85291(3) 0.02134(9) Uani 1 1 d . . . . .
 Si1 Si 0.37332(4) -0.02240(3) 0.76646(5) 0.02653(14) Uani 1 1 d . . . . .
 N1 N 0.26408(12) 0.03438(9) 0.71718(14) 0.0217(3) Uani 1 1 d . . . . .
 C1 C 0.43209(14) 0.09963(11) 0.93367(18) 0.0250(4) Uani 1 1 d . . . . .
 C2 C 0.39062(14) 0.02389(11) 0.91380(17) 0.0230(4) Uani 1 1 d . . . . .
 C3 C 0.32007(14) 0.01231(11) 1.00508(17) 0.0217(4) Uani 1 1 d . . . . .
 C4 C 0.25869(15) -0.05128(12) 1.03421(18) 0.0268(4) Uani 1 1 d . . . . .
 H4 H 0.262453 -0.097776 0.992226 0.032 Uiso 1 1 calc R . . . .
 C5 C 0.19436(16) -0.04512(12) 1.12283(19) 0.0313(5) Uani 1 1 d . . . . .
 H5 H 0.154568 -0.088169 1.142920 0.038 Uiso 1 1 calc R . . . .
 C6 C 0.18524(16) 0.02345(12) 1.18557(18) 0.0312(5) Uani 1 1 d . . . . .
 H6 H 0.138799 0.025828 1.246043 0.037 Uiso 1 1 calc R . . . .
 C7 C 0.24203(16) 0.08647(12) 1.16085(18) 0.0281(4) Uani 1 1 d . . . . .
 H7 H 0.235807 0.132458 1.203524 0.034 Uiso 1 1 calc R . . . .
 C8 C 0.31045(15) 0.08154(11) 1.06998(18) 0.0243(4) Uani 1 1 d . . . . .
 C9 C 0.38152(15) 0.13654(11) 1.02524(18) 0.0256(4) Uani 1 1 d . . . . .
 C10 C 0.40631(17) 0.21194(12) 1.0583(2) 0.0337(5) Uani 1 1 d . . . . .
 H10 H 0.372409 0.236006 1.119222 0.040 Uiso 1 1 calc R . . . .
 C11 C 0.48075(18) 0.25033(13) 1.0008(2) 0.0417(6) Uani 1 1 d . . . . .
 H11 H 0.498134 0.301431 1.021855 0.050 Uiso 1 1 calc R . . . .
 C12 C 0.53097(18) 0.21459(14) 0.9114(2) 0.0441(6) Uani 1 1 d . . . . .
 H12 H 0.583087 0.241911 0.874252 0.053 Uiso 1 1 calc R . . . .
 C13 C 0.50758(16) 0.14180(13) 0.8759(2) 0.0338(5) Uani 1 1 d . . . . .
 H13 H 0.541323 0.119583 0.813313 0.041 Uiso 1 1 calc R . . . .
 C14 C 0.24898(16) 0.21267(12) 0.80510(19) 0.0306(5) Uani 1 1 d . . . . .
 H14A H 0.321473 0.231813 0.809444 0.046 Uiso 1 1 calc GR . . . .
 H14B H 0.208811 0.241804 0.859071 0.046 Uiso 1 1 calc GR . . . .
 H14C H 0.216041 0.218283 0.724476 0.046 Uiso 1 1 calc GR . . . .
 C15 C 0.09389(16) 0.08606(13) 0.8977(2) 0.0321(5) Uani 1 1 d . . . . .
 H15A H 0.044904 0.093871 0.827329 0.048 Uiso 1 1 calc GR . . . .
 H15B H 0.080453 0.124178 0.957271 0.048 Uiso 1 1 calc GR . . . .
 H15C H 0.083722 0.034959 0.929276 0.048 Uiso 1 1 calc GR . . . .
 C16 C 0.35018(19) -0.12677(13) 0.7758(2) 0.0399(6) Uani 1 1 d . . . . .
 H16A H 0.408266 -0.150332 0.825217 0.060 Uiso 1 1 calc GR . . . .
 H16B H 0.346383 -0.148933 0.696606 0.060 Uiso 1 1 calc GR . . . .
 H16C H 0.283717 -0.136020 0.810327 0.060 Uiso 1 1 calc GR . . . .
 C17 C 0.48962(17) -0.01120(17) 0.6796(2) 0.0474(7) Uani 1 1 d . . . . .
 H17A H 0.498860 0.042736 0.661062 0.071 Uiso 1 1 calc GR . . . .
 H17B H 0.478106 -0.040405 0.606330 0.071 Uiso 1 1 calc GR . . . .
 H17C H 0.552935 -0.030052 0.725844 0.071 Uiso 1 1 calc GR . . . .
 C18 C 0.21366(15) 0.03607(11) 0.59360(17) 0.0235(4) Uani 1 1 d . . . . .
 C19 C 0.28216(18) 0.08777(12) 0.52208(19) 0.0322(5) Uani 1 1 d . . . . .
 H19A H 0.250250 0.091466 0.440759 0.048 Uiso 1 1 calc GR . . . .
 H19B H 0.353036 0.066029 0.522580 0.048 Uiso 1 1 calc GR . . . .
 H19C H 0.286704 0.138645 0.557501 0.048 Uiso 1 1 calc GR . . . .
 C20 C 0.10364(16) 0.07388(12) 0.58442(19) 0.0298(5) Uani 1 1 d . . . . .
 H20A H 0.075083 0.075698 0.501693 0.045 Uiso 1 1 calc GR . . . .
 H20B H 0.109751 0.125751 0.615992 0.045 Uiso 1 1 calc GR . . . .
 H20C H 0.056333 0.044153 0.629760 0.045 Uiso 1 1 calc GR . . . .
 C21 C 0.20481(15) -0.04538(11) 0.54462(18) 0.0261(4) Uani 1 1 d . . . . .
 C22 C 0.14372(15) -0.10302(11) 0.59873(19) 0.0272(4) Uani 1 1 d . . . . .
 C23 C 0.09234(15) -0.09136(12) 0.7021(2) 0.0314(5) Uani 1 1 d . . . . .
 H23 H 0.096330 -0.042785 0.738902 0.038 Uiso 1 1 calc R . . . .
 C24 C 0.03695(17) -0.14846(14) 0.7504(2) 0.0399(6) Uani 1 1 d . . . . .
 H24 H 0.003111 -0.139039 0.819833 0.048 Uiso 1 1 calc R . . . .
 C25 C 0.02996(19) -0.22086(14) 0.6978(3) 0.0483(7) Uani 1 1 d . . . . .
 H25 H -0.009372 -0.260041 0.730992 0.058 Uiso 1 1 calc R . . . .
 C26 C 0.07925(19) -0.23468(14) 0.6001(3) 0.0455(6) Uani 1 1 d . . . . .
 H26 H 0.074744 -0.284016 0.565793 0.055 Uiso 1 1 calc R . . . .
 C27 C 0.13768(16) -0.17717(12) 0.5472(2) 0.0333(5) Uani 1 1 d . . . . .
 C28 C 0.19232(19) -0.19397(14) 0.4486(2) 0.0420(6) Uani 1 1 d . . . . .
 H28 H 0.188138 -0.243617 0.415427 0.050 Uiso 1 1 calc R . . . .
 C29 C 0.25107(19) -0.13958(14) 0.4004(2) 0.0406(6) Uani 1 1 d . . . . .
 H29 H 0.288436 -0.151224 0.334338 0.049 Uiso 1 1 calc R . . . .
 C30 C 0.25609(18) -0.06589(13) 0.44925(19) 0.0334(5) Uani 1 1 d . . . . .
 H30 H 0.297164 -0.028543 0.414185 0.040 Uiso 1 1 calc R . . . .

loop_
  _atom_site_aniso_label
  _atom_site_aniso_U_11
  _atom_site_aniso_U_22
  _atom_site_aniso_U_33
  _atom_site_aniso_U_23
  _atom_site_aniso_U_13
  _atom_site_aniso_U_12
 Ti1 0.01741(16) 0.02442(18) 0.02229(18) 0.00276(14) 0.00243(12) 0.00237(13)
 Si1 0.0202(3) 0.0365(3) 0.0230(3) -0.0014(2) 0.0022(2) 0.0077(2)
 N1 0.0182(7) 0.0263(8) 0.0204(8) 0.0021(6) 0.0011(6) 0.0011(6)
 C1 0.0173(9) 0.0289(10) 0.0281(11) 0.0063(8) -0.0010(7) 0.0019(8)
 C2 0.0181(9) 0.0284(10) 0.0225(10) 0.0032(8) 0.0011(7) 0.0031(7)
 C3 0.0177(8) 0.0244(10) 0.0225(10) 0.0021(7) -0.0009(7) 0.0020(7)
 C4 0.0240(10) 0.0259(10) 0.0303(11) 0.0023(8) 0.0009(8) 0.0012(8)
 C5 0.0248(10) 0.0328(12) 0.0367(13) 0.0112(9) 0.0047(9) -0.0004(8)
 C6 0.0287(11) 0.0415(13) 0.0244(11) 0.0058(9) 0.0068(8) 0.0051(9)
 C7 0.0283(10) 0.0332(11) 0.0225(11) 0.0014(8) 0.0007(8) 0.0063(8)
 C8 0.0226(9) 0.0272(10) 0.0225(10) 0.0026(7) -0.0009(8) 0.0023(7)
 C9 0.0225(9) 0.0260(10) 0.0274(11) 0.0031(8) -0.0022(8) -0.0005(8)
 C10 0.0313(11) 0.0299(11) 0.0381(13) -0.0001(9) -0.0072(9) 0.0010(9)
 C11 0.0337(12) 0.0271(11) 0.0622(17) 0.0061(11) -0.0068(11) -0.0062(9)
 C12 0.0265(11) 0.0407(14) 0.0650(18) 0.0179(12) 0.0048(11) -0.0061(10)
 C13 0.0218(10) 0.0408(13) 0.0395(13) 0.0115(10) 0.0063(9) 0.0003(9)
 C14 0.0300(11) 0.0299(11) 0.0316(12) 0.0032(9) 0.0007(9) 0.0018(8)
 C15 0.0205(10) 0.0415(13) 0.0350(12) 0.0079(9) 0.0064(8) 0.0067(8)
 C16 0.0444(13) 0.0345(12) 0.0380(13) -0.0091(10) -0.0105(11) 0.0172(10)
 C17 0.0275(12) 0.084(2) 0.0311(13) -0.0001(12) 0.0068(10) 0.0165(12)
 C18 0.0231(9) 0.0257(10) 0.0214(10) 0.0024(8) -0.0005(7) -0.0010(7)
 C19 0.0384(12) 0.0336(12) 0.0243(11) 0.0060(9) 0.0007(9) -0.0076(9)
 C20 0.0270(10) 0.0292(11) 0.0314(12) 0.0029(9) -0.0058(9) 0.0034(8)
 C21 0.0214(9) 0.0294(10) 0.0263(11) 0.0029(8) -0.0040(8) 0.0011(8)
 C22 0.0187(9) 0.0280(10) 0.0338(12) 0.0040(8) -0.0042(8) 0.0004(8)
 C23 0.0211(10) 0.0304(11) 0.0424(13) 0.0069(9) 0.0011(9) -0.0003(8)
 C24 0.0261(11) 0.0414(13) 0.0530(16) 0.0131(11) 0.0074(10) -0.0010(9)
 C25 0.0305(12) 0.0356(14) 0.078(2) 0.0148(13) 0.0016(13) -0.0072(10)
 C26 0.0366(13) 0.0285(12) 0.0692(19) 0.0039(11) -0.0065(13) -0.0045(10)
 C27 0.0291(11) 0.0265(11) 0.0424(13) 0.0012(9) -0.0074(10) -0.0015(8)
 C28 0.0454(14) 0.0330(12) 0.0449(15) -0.0100(10) -0.0102(12) 0.0069(10)
 C29 0.0462(14) 0.0446(14) 0.0305(12) -0.0051(10) 0.0013(10) 0.0068(11)
 C30 0.0356(12) 0.0376(12) 0.0264(11) 0.0008(9) -0.0003(9) 0.0021(9)

_geom_special_details
;
 All esds (except the esd in the dihedral angle between two l.s. planes)
 are estimated using the full covariance matrix.  The cell esds are taken
 into account individually in the estimation of esds in distances, angles
 and torsion angles; correlations between esds in cell parameters are only
 used when they are defined by crystal symmetry.  An approximate (isotropic)
 treatment of cell esds is used for estimating esds involving l.s. planes.
;
loop_
  _geom_bond_atom_site_label_1
  _geom_bond_atom_site_label_2
  _geom_bond_distance
  _geom_bond_site_symmetry_2
  _geom_bond_publ_flag
 Ti1 N1 1.9220(17) . ?
 Ti1 C1 2.4135(19) . ?
 Ti1 C2 2.2603(19) . ?
 Ti1 C3 2.3960(19) . ?
 Ti1 C14 2.100(2) . ?
 Ti1 C15 2.111(2) . ?
 Si1 N1 1.7618(16) . ?
 Si1 C2 1.861(2) . ?
 Si1 C16 1.861(2) . ?
 Si1 C17 1.867(2) . ?
 N1 C18 1.494(2) . ?
 C1 C2 1.441(3) . ?
 C1 C9 1.432(3) . ?
 C1 C13 1.423(3) . ?
 C2 C3 1.451(3) . ?
 C3 C4 1.420(3) . ?
 C3 C8 1.434(3) . ?
 C4 H4 0.9500 . ?
 C4 C5 1.363(3) . ?
 C5 H5 0.9500 . ?
 C5 C6 1.411(3) . ?
 C6 H6 0.9500 . ?
 C6 C7 1.366(3) . ?
 C7 H7 0.9500 . ?
 C7 C8 1.417(3) . ?
 C8 C9 1.449(3) . ?
 C9 C10 1.405(3) . ?
 C10 H10 0.9500 . ?
 C10 C11 1.378(3) . ?
 C11 H11 0.9500 . ?
 C11 C12 1.401(4) . ?
 C12 H12 0.9500 . ?
 C12 C13 1.365(3) . ?
 C13 H13 0.9500 . ?
 C14 H14A 0.9800 . ?
 C14 H14B 0.9800 . ?
 C14 H14C 0.9800 . ?
 C15 H15A 0.9800 . ?
 C15 H15B 0.9800 . ?
 C15 H15C 0.9800 . ?
 C16 H16A 0.9800 . ?
 C16 H16B 0.9800 . ?
 C16 H16C 0.9800 . ?
 C17 H17A 0.9800 . ?
 C17 H17B 0.9800 . ?
 C17 H17C 0.9800 . ?
 C18 C19 1.543(3) . ?
 C18 C20 1.546(3) . ?
 C18 C21 1.536(3) . ?
 C19 H19A 0.9800 . ?
 C19 H19B 0.9800 . ?
 C19 H19C 0.9800 . ?
 C20 H20A 0.9800 . ?
 C20 H20B 0.9800 . ?
 C20 H20C 0.9800 . ?
 C21 C22 1.449(3) . ?
 C21 C30 1.368(3) . ?
 C22 C23 1.415(3) . ?
 C22 C27 1.428(3) . ?
 C23 H23 0.9500 . ?
 C23 C24 1.371(3) . ?
 C24 H24 0.9500 . ?
 C24 C25 1.405(4) . ?
 C25 H25 0.9500 . ?
 C25 C26 1.351(4) . ?
 C26 H26 0.9500 . ?
 C26 C27 1.421(3) . ?
 C27 C28 1.408(3) . ?
 C28 H28 0.9500 . ?
 C28 C29 1.360(4) . ?
 C29 H29 0.9500 . ?
 C29 C30 1.408(3) . ?
 C30 H30 0.9500 . ?

loop_
  _geom_angle_atom_site_label_1
  _geom_angle_atom_site_label_2
  _geom_angle_atom_site_label_3
  _geom_angle
  _geom_angle_site_symmetry_1
  _geom_angle_site_symmetry_3
  _geom_angle_publ_flag
 N1 Ti1 C1 99.31(7) . . ?
 N1 Ti1 C2 78.01(7) . . ?
 N1 Ti1 C3 99.84(7) . . ?
 N1 Ti1 C14 110.14(8) . . ?
 N1 Ti1 C15 107.45(8) . . ?
 C2 Ti1 C1 35.74(7) . . ?
 C2 Ti1 C3 36.16(7) . . ?
 C3 Ti1 C1 56.99(6) . . ?
 C14 Ti1 C1 93.80(7) . . ?
 C14 Ti1 C2 128.10(8) . . ?
 C14 Ti1 C3 141.49(8) . . ?
 C14 Ti1 C15 99.62(8) . . ?
 C15 Ti1 C1 143.48(8) . . ?
 C15 Ti1 C2 127.64(8) . . ?
 C15 Ti1 C3 93.61(7) . . ?
 N1 Si1 Ti1 41.39(5) . . ?
 N1 Si1 C2 93.75(8) . . ?
 N1 Si1 C16 116.81(9) . . ?
 N1 Si1 C17 114.42(10) . . ?
 C2 Si1 Ti1 52.36(6) . . ?
 C2 Si1 C17 113.51(10) . . ?
 C16 Si1 Ti1 127.66(8) . . ?
 C16 Si1 C2 112.65(10) . . ?
 C16 Si1 C17 105.76(12) . . ?
 C17 Si1 Ti1 126.47(10) . . ?
 Si1 N1 Ti1 101.30(8) . . ?
 C18 N1 Ti1 133.22(12) . . ?
 C18 N1 Si1 124.80(12) . . ?
 C2 C1 Ti1 66.33(10) . . ?
 C9 C1 Ti1 78.80(11) . . ?
 C9 C1 C2 110.45(17) . . ?
 C13 C1 Ti1 119.91(14) . . ?
 C13 C1 C2 131.4(2) . . ?
 C13 C1 C9 118.09(19) . . ?
 Si1 C2 Ti1 86.94(7) . . ?
 C1 C2 Ti1 77.94(11) . . ?
 C1 C2 Si1 123.79(15) . . ?
 C1 C2 C3 105.01(16) . . ?
 C3 C2 Ti1 77.02(10) . . ?
 C3 C2 Si1 123.82(14) . . ?
 C2 C3 Ti1 66.82(10) . . ?
 C4 C3 Ti1 118.88(13) . . ?
 C4 C3 C2 131.98(18) . . ?
 C4 C3 C8 118.09(18) . . ?
 C8 C3 Ti1 78.63(11) . . ?
 C8 C3 C2 109.84(17) . . ?
 C3 C4 H4 120.2 . . ?
 C5 C4 C3 119.52(19) . . ?
 C5 C4 H4 120.2 . . ?
 C4 C5 H5 119.1 . . ?
 C4 C5 C6 121.8(2) . . ?
 C6 C5 H5 119.1 . . ?
 C5 C6 H6 119.4 . . ?
 C7 C6 C5 121.1(2) . . ?
 C7 C6 H6 119.4 . . ?
 C6 C7 H7 120.8 . . ?
 C6 C7 C8 118.34(19) . . ?
 C8 C7 H7 120.8 . . ?
 C3 C8 Ti1 67.73(11) . . ?
 C3 C8 C9 107.31(17) . . ?
 C7 C8 Ti1 123.75(13) . . ?
 C7 C8 C3 121.11(18) . . ?
 C7 C8 C9 131.57(19) . . ?
 C9 C8 Ti1 74.15(11) . . ?
 C1 C9 Ti1 67.87(11) . . ?
 C1 C9 C8 107.03(17) . . ?
 C8 C9 Ti1 72.81(11) . . ?
 C10 C9 Ti1 125.20(14) . . ?
 C10 C9 C1 121.17(19) . . ?
 C10 C9 C8 131.8(2) . . ?
 C9 C10 H10 120.6 . . ?
 C11 C10 C9 118.7(2) . . ?
 C11 C10 H10 120.6 . . ?
 C10 C11 H11 119.7 . . ?
 C10 C11 C12 120.5(2) . . ?
 C12 C11 H11 119.7 . . ?
 C11 C12 H12 118.9 . . ?
 C13 C12 C11 122.2(2) . . ?
 C13 C12 H12 118.9 . . ?
 C1 C13 H13 120.4 . . ?
 C12 C13 C1 119.2(2) . . ?
 C12 C13 H13 120.4 . . ?
 Ti1 C14 H14A 109.5 . . ?
 Ti1 C14 H14B 109.5 . . ?
 Ti1 C14 H14C 109.5 . . ?
 H14A C14 H14B 109.5 . . ?
 H14A C14 H14C 109.5 . . ?
 H14B C14 H14C 109.5 . . ?
 Ti1 C15 H15A 109.5 . . ?
 Ti1 C15 H15B 109.5 . . ?
 Ti1 C15 H15C 109.5 . . ?
 H15A C15 H15B 109.5 . . ?
 H15A C15 H15C 109.5 . . ?
 H15B C15 H15C 109.5 . . ?
 Si1 C16 H16A 109.5 . . ?
 Si1 C16 H16B 109.5 . . ?
 Si1 C16 H16C 109.5 . . ?
 H16A C16 H16B 109.5 . . ?
 H16A C16 H16C 109.5 . . ?
 H16B C16 H16C 109.5 . . ?
 Si1 C17 H17A 109.5 . . ?
 Si1 C17 H17B 109.5 . . ?
 Si1 C17 H17C 109.5 . . ?
 H17A C17 H17B 109.5 . . ?
 H17A C17 H17C 109.5 . . ?
 H17B C17 H17C 109.5 . . ?
 N1 C18 C19 107.15(15) . . ?
 N1 C18 C20 112.40(16) . . ?
 N1 C18 C21 109.58(15) . . ?
 C19 C18 C20 105.36(16) . . ?
 C21 C18 C19 112.45(17) . . ?
 C21 C18 C20 109.85(16) . . ?
 C18 C19 H19A 109.5 . . ?
 C18 C19 H19B 109.5 . . ?
 C18 C19 H19C 109.5 . . ?
 H19A C19 H19B 109.5 . . ?
 H19A C19 H19C 109.5 . . ?
 H19B C19 H19C 109.5 . . ?
 C18 C20 H20A 109.5 . . ?
 C18 C20 H20B 109.5 . . ?
 C18 C20 H20C 109.5 . . ?
 H20A C20 H20B 109.5 . . ?
 H20A C20 H20C 109.5 . . ?
 H20B C20 H20C 109.5 . . ?
 C22 C21 C18 121.34(18) . . ?
 C30 C21 C18 120.66(19) . . ?
 C30 C21 C22 118.0(2) . . ?
 C23 C22 C21 124.15(19) . . ?
 C23 C22 C27 117.59(19) . . ?
 C27 C22 C21 118.2(2) . . ?
 C22 C23 H23 119.2 . . ?
 C24 C23 C22 121.6(2) . . ?
 C24 C23 H23 119.2 . . ?
 C23 C24 H24 119.8 . . ?
 C23 C24 C25 120.3(2) . . ?
 C25 C24 H24 119.8 . . ?
 C24 C25 H25 120.0 . . ?
 C26 C25 C24 119.9(2) . . ?
 C26 C25 H25 120.0 . . ?
 C25 C26 H26 119.2 . . ?
 C25 C26 C27 121.6(2) . . ?
 C27 C26 H26 119.2 . . ?
 C26 C27 C22 119.0(2) . . ?
 C28 C27 C22 120.5(2) . . ?
 C28 C27 C26 120.4(2) . . ?
 C27 C28 H28 119.8 . . ?
 C29 C28 C27 120.4(2) . . ?
 C29 C28 H28 119.8 . . ?
 C28 C29 H29 120.2 . . ?
 C28 C29 C30 119.5(2) . . ?
 C30 C29 H29 120.2 . . ?
 C21 C30 C29 123.3(2) . . ?
 C21 C30 H30 118.4 . . ?
 C29 C30 H30 118.4 . . ?

loop_
  _geom_torsion_atom_site_label_1
  _geom_torsion_atom_site_label_2
  _geom_torsion_atom_site_label_3
  _geom_torsion_atom_site_label_4
  _geom_torsion
  _geom_torsion_site_symmetry_1
  _geom_torsion_site_symmetry_2
  _geom_torsion_site_symmetry_3
  _geom_torsion_site_symmetry_4
  _geom_torsion_publ_flag
 Ti1 Si1 N1 C18 171.66(19) . . . . ?
 Ti1 Si1 C2 C1 -73.29(15) . . . . ?
 Ti1 Si1 C2 C3 72.15(15) . . . . ?
 Ti1 N1 C18 C19 88.68(19) . . . . ?
 Ti1 N1 C18 C20 -26.6(2) . . . . ?
 Ti1 N1 C18 C21 -149.04(14) . . . . ?
 Ti1 C1 C2 Si1 77.96(13) . . . . ?
 Ti1 C1 C2 C3 -72.84(12) . . . . ?
 Ti1 C1 C9 C8 62.73(13) . . . . ?
 Ti1 C1 C9 C10 -118.77(18) . . . . ?
 Ti1 C1 C13 C12 94.7(2) . . . . ?
 Ti1 C2 C3 C4 108.8(2) . . . . ?
 Ti1 C2 C3 C8 -67.51(13) . . . . ?
 Ti1 C3 C4 C5 -93.1(2) . . . . ?
 Ti1 C3 C8 C7 117.01(17) . . . . ?
 Ti1 C3 C8 C9 -64.10(13) . . . . ?
 Ti1 C8 C9 C1 -59.52(13) . . . . ?
 Ti1 C8 C9 C10 122.2(2) . . . . ?
 Ti1 C9 C10 C11 -83.5(2) . . . . ?
 Si1 N1 C18 C19 -80.06(19) . . . . ?
 Si1 N1 C18 C20 164.65(13) . . . . ?
 Si1 N1 C18 C21 42.2(2) . . . . ?
 Si1 C2 C3 Ti1 -77.27(13) . . . . ?
 Si1 C2 C3 C4 31.5(3) . . . . ?
 Si1 C2 C3 C8 -144.79(15) . . . . ?
 N1 Si1 C2 Ti1 0.18(7) . . . . ?
 N1 Si1 C2 C1 -73.10(16) . . . . ?
 N1 Si1 C2 C3 72.33(16) . . . . ?
 N1 C18 C21 C22 61.1(2) . . . . ?
 N1 C18 C21 C30 -117.8(2) . . . . ?
 C1 C2 C3 Ti1 73.51(12) . . . . ?
 C1 C2 C3 C4 -177.74(19) . . . . ?
 C1 C2 C3 C8 6.0(2) . . . . ?
 C1 C9 C10 C11 0.0(3) . . . . ?
 C2 Si1 N1 Ti1 -0.22(9) . . . . ?
 C2 Si1 N1 C18 171.44(15) . . . . ?
 C2 C1 C9 Ti1 -59.29(13) . . . . ?
 C2 C1 C9 C8 3.4(2) . . . . ?
 C2 C1 C9 C10 -178.06(18) . . . . ?
 C2 C1 C13 C12 178.4(2) . . . . ?
 C2 C3 C4 C5 -176.88(19) . . . . ?
 C2 C3 C8 Ti1 60.04(12) . . . . ?
 C2 C3 C8 C7 177.05(17) . . . . ?
 C2 C3 C8 C9 -4.1(2) . . . . ?
 C3 C4 C5 C6 1.2(3) . . . . ?
 C3 C8 C9 Ti1 59.92(13) . . . . ?
 C3 C8 C9 C1 0.4(2) . . . . ?
 C3 C8 C9 C10 -177.9(2) . . . . ?
 C4 C3 C8 Ti1 -116.81(16) . . . . ?
 C4 C3 C8 C7 0.2(3) . . . . ?
 C4 C3 C8 C9 179.09(17) . . . . ?
 C4 C5 C6 C7 -0.9(3) . . . . ?
 C5 C6 C7 C8 0.2(3) . . . . ?
 C6 C7 C8 Ti1 82.7(2) . . . . ?
 C6 C7 C8 C3 0.1(3) . . . . ?
 C6 C7 C8 C9 -178.5(2) . . . . ?
 C7 C8 C9 Ti1 -121.3(2) . . . . ?
 C7 C8 C9 C1 179.1(2) . . . . ?
 C7 C8 C9 C10 0.8(4) . . . . ?
 C8 C3 C4 C5 -0.9(3) . . . . ?
 C8 C9 C10 C11 178.1(2) . . . . ?
 C9 C1 C2 Ti1 67.06(14) . . . . ?
 C9 C1 C2 Si1 145.02(15) . . . . ?
 C9 C1 C2 C3 -5.8(2) . . . . ?
 C9 C1 C13 C12 1.7(3) . . . . ?
 C9 C10 C11 C12 -0.3(3) . . . . ?
 C10 C11 C12 C13 1.3(4) . . . . ?
 C11 C12 C13 C1 -2.0(3) . . . . ?
 C13 C1 C2 Ti1 -109.8(2) . . . . ?
 C13 C1 C2 Si1 -31.9(3) . . . . ?
 C13 C1 C2 C3 177.3(2) . . . . ?
 C13 C1 C9 Ti1 118.07(18) . . . . ?
 C13 C1 C9 C8 -179.21(17) . . . . ?
 C13 C1 C9 C10 -0.7(3) . . . . ?
 C16 Si1 N1 Ti1 117.52(10) . . . . ?
 C16 Si1 N1 C18 -70.82(17) . . . . ?
 C16 Si1 C2 Ti1 -120.95(9) . . . . ?
 C16 Si1 C2 C1 165.76(16) . . . . ?
 C16 Si1 C2 C3 -48.80(19) . . . . ?
 C17 Si1 N1 Ti1 -118.18(11) . . . . ?
 C17 Si1 N1 C18 53.48(18) . . . . ?
 C17 Si1 C2 Ti1 118.89(10) . . . . ?
 C17 Si1 C2 C1 45.60(19) . . . . ?
 C17 Si1 C2 C3 -168.96(16) . . . . ?
 C18 C21 C22 C23 -3.2(3) . . . . ?
 C18 C21 C22 C27 179.01(17) . . . . ?
 C18 C21 C30 C29 179.97(19) . . . . ?
 C19 C18 C21 C22 -179.82(17) . . . . ?
 C19 C18 C21 C30 1.2(3) . . . . ?
 C20 C18 C21 C22 -62.8(2) . . . . ?
 C20 C18 C21 C30 118.2(2) . . . . ?
 C21 C22 C23 C24 -178.9(2) . . . . ?
 C21 C22 C27 C26 179.19(19) . . . . ?
 C21 C22 C27 C28 1.8(3) . . . . ?
 C22 C21 C30 C29 1.0(3) . . . . ?
 C22 C23 C24 C25 0.1(3) . . . . ?
 C22 C27 C28 C29 -0.5(3) . . . . ?
 C23 C22 C27 C26 1.3(3) . . . . ?
 C23 C22 C27 C28 -176.10(19) . . . . ?
 C23 C24 C25 C26 0.9(4) . . . . ?
 C24 C25 C26 C27 -0.8(4) . . . . ?
 C25 C26 C27 C22 -0.3(3) . . . . ?
 C25 C26 C27 C28 177.1(2) . . . . ?
 C26 C27 C28 C29 -177.8(2) . . . . ?
 C27 C22 C23 C24 -1.2(3) . . . . ?
 C27 C28 C29 C30 -0.6(3) . . . . ?
 C28 C29 C30 C21 0.4(3) . . . . ?
 C30 C21 C22 C23 175.73(19) . . . . ?
 C30 C21 C22 C27 -2.0(3) . . . . ?

_shelx_res_file
;
TITL dm16699 in P2(1)/c
    dm16699.res
    created by SHELXL-2016/6 at 16:13:46 on 27-Oct-2016
CELL 0.71073 12.742 17.5617 11.404 90 95.269 90
ZERR 4 0.0026 0.0035 0.0023 0 0.004 0
LATT 1
SYMM -X,0.5+Y,0.5-Z
SFAC C H N Si Ti
UNIT 120 132 4 4 4

L.S. 5
PLAN  -10 0 0
SIZE 0.12 0.15 0.2
TEMP -143.15
CONN 6 1.45 Ti1
BOND $H
fmap 2
MORE -1
ACTA 52
CONF
REM <olex2.extras>
REM <HklSrc "%.\\dm16699.hkl">
REM </olex2.extras>

WGHT    0.061200
FVAR       0.15545
TI1   5    0.250277    0.097195    0.852914    11.00000    0.01741    0.02442 =
         0.02229    0.00276    0.00243    0.00237
SI1   4    0.373319   -0.022402    0.766463    11.00000    0.02017    0.03649 =
         0.02297   -0.00136    0.00224    0.00765
N1    3    0.264083    0.034381    0.717175    11.00000    0.01822    0.02635 =
         0.02045    0.00214    0.00115    0.00106
C1    1    0.432090    0.099633    0.933667    11.00000    0.01733    0.02894 =
         0.02814    0.00634   -0.00103    0.00187
C2    1    0.390617    0.023894    0.913804    11.00000    0.01806    0.02838 =
         0.02250    0.00323    0.00109    0.00310
C3    1    0.320067    0.012315    1.005079    11.00000    0.01767    0.02443 =
         0.02252    0.00207   -0.00089    0.00199
C4    1    0.258691   -0.051280    1.034211    11.00000    0.02400    0.02589 =
         0.03032    0.00229    0.00095    0.00124
AFIX  43
H4    2    0.262453   -0.097776    0.992226    11.00000   -1.20000
AFIX   0
C5    1    0.194361   -0.045118    1.122833    11.00000    0.02475    0.03281 =
         0.03675    0.01119    0.00467   -0.00039
AFIX  43
H5    2    0.154568   -0.088169    1.142920    11.00000   -1.20000
AFIX   0
C6    1    0.185241    0.023452    1.185569    11.00000    0.02871    0.04147 =
         0.02437    0.00584    0.00683    0.00512
AFIX  43
H6    2    0.138799    0.025828    1.246043    11.00000   -1.20000
AFIX   0
C7    1    0.242028    0.086467    1.160853    11.00000    0.02834    0.03316 =
         0.02247    0.00140    0.00068    0.00626
AFIX  43
H7    2    0.235807    0.132458    1.203524    11.00000   -1.20000
AFIX   0
C8    1    0.310451    0.081538    1.069983    11.00000    0.02260    0.02720 =
         0.02253    0.00263   -0.00090    0.00234
C9    1    0.381524    0.136539    1.025241    11.00000    0.02254    0.02598 =
         0.02742    0.00312   -0.00221   -0.00054
C10   1    0.406310    0.211940    1.058331    11.00000    0.03129    0.02987 =
         0.03807   -0.00013   -0.00721    0.00098
AFIX  43
H10   2    0.372409    0.236006    1.119222    11.00000   -1.20000
AFIX   0
C11   1    0.480752    0.250329    1.000764    11.00000    0.03372    0.02711 =
         0.06223    0.00614   -0.00679   -0.00625
AFIX  43
H11   2    0.498134    0.301431    1.021855    11.00000   -1.20000
AFIX   0
C12   1    0.530972    0.214586    0.911410    11.00000    0.02653    0.04074 =
         0.06502    0.01794    0.00478   -0.00611
AFIX  43
H12   2    0.583087    0.241911    0.874252    11.00000   -1.20000
AFIX   0
C13   1    0.507585    0.141803    0.875880    11.00000    0.02183    0.04079 =
         0.03948    0.01146    0.00625    0.00027
AFIX  43
H13   2    0.541323    0.119583    0.813313    11.00000   -1.20000
AFIX   0
C14   1    0.248977    0.212667    0.805102    11.00000    0.03001    0.02990 =
         0.03155    0.00316    0.00074    0.00182
AFIX 137
H14A  2    0.321473    0.231813    0.809444    11.00000   -1.50000
H14B  2    0.208811    0.241804    0.859071    11.00000   -1.50000
H14C  2    0.216041    0.218283    0.724476    11.00000   -1.50000
AFIX   0
C15   1    0.093892    0.086059    0.897696    11.00000    0.02055    0.04148 =
         0.03503    0.00795    0.00643    0.00670
AFIX 137
H15A  2    0.044904    0.093871    0.827329    11.00000   -1.50000
H15B  2    0.080453    0.124178    0.957271    11.00000   -1.50000
H15C  2    0.083722    0.034959    0.929276    11.00000   -1.50000
AFIX   0
C16   1    0.350183   -0.126775    0.775753    11.00000    0.04444    0.03448 =
         0.03802   -0.00912   -0.01046    0.01723
AFIX 137
H16A  2    0.408266   -0.150332    0.825217    11.00000   -1.50000
H16B  2    0.346383   -0.148933    0.696606    11.00000   -1.50000
H16C  2    0.283717   -0.136020    0.810327    11.00000   -1.50000
AFIX   0
C17   1    0.489617   -0.011200    0.679609    11.00000    0.02753    0.08446 =
         0.03107   -0.00008    0.00684    0.01650
AFIX 137
H17A  2    0.498860    0.042736    0.661062    11.00000   -1.50000
H17B  2    0.478106   -0.040405    0.606330    11.00000   -1.50000
H17C  2    0.552935   -0.030052    0.725844    11.00000   -1.50000
AFIX   0
C18   1    0.213656    0.036074    0.593596    11.00000    0.02313    0.02567 =
         0.02137    0.00242   -0.00048   -0.00098
C19   1    0.282164    0.087771    0.522083    11.00000    0.03839    0.03355 =
         0.02429    0.00604    0.00074   -0.00757
AFIX 137
H19A  2    0.250250    0.091466    0.440759    11.00000   -1.50000
H19B  2    0.353036    0.066029    0.522580    11.00000   -1.50000
H19C  2    0.286704    0.138645    0.557501    11.00000   -1.50000
AFIX   0
C20   1    0.103636    0.073879    0.584420    11.00000    0.02702    0.02923 =
         0.03144    0.00293   -0.00584    0.00336
AFIX 137
H20A  2    0.075083    0.075698    0.501693    11.00000   -1.50000
H20B  2    0.109751    0.125751    0.615992    11.00000   -1.50000
H20C  2    0.056333    0.044153    0.629760    11.00000   -1.50000
AFIX   0
C21   1    0.204807   -0.045380    0.544622    11.00000    0.02139    0.02941 =
         0.02632    0.00288   -0.00399    0.00108
C22   1    0.143719   -0.103024    0.598734    11.00000    0.01874    0.02795 =
         0.03382    0.00403   -0.00422    0.00039
C23   1    0.092341   -0.091361    0.702102    11.00000    0.02114    0.03039 =
         0.04236    0.00691    0.00109   -0.00035
AFIX  43
H23   2    0.096330   -0.042785    0.738902    11.00000   -1.20000
AFIX   0
C24   1    0.036951   -0.148461    0.750426    11.00000    0.02612    0.04141 =
         0.05300    0.01313    0.00743   -0.00098
AFIX  43
H24   2    0.003111   -0.139039    0.819833    11.00000   -1.20000
AFIX   0
C25   1    0.029963   -0.220858    0.697835    11.00000    0.03054    0.03564 =
         0.07794    0.01485    0.00157   -0.00717
AFIX  43
H25   2   -0.009372   -0.260041    0.730992    11.00000   -1.20000
AFIX   0
C26   1    0.079253   -0.234680    0.600053    11.00000    0.03658    0.02849 =
         0.06921    0.00393   -0.00654   -0.00449
AFIX  43
H26   2    0.074744   -0.284016    0.565793    11.00000   -1.20000
AFIX   0
C27   1    0.137676   -0.177173    0.547246    11.00000    0.02909    0.02646 =
         0.04237    0.00122   -0.00738   -0.00150
C28   1    0.192321   -0.193965    0.448589    11.00000    0.04543    0.03299 =
         0.04485   -0.00997   -0.01023    0.00685
AFIX  43
H28   2    0.188138   -0.243617    0.415427    11.00000   -1.20000
AFIX   0
C29   1    0.251068   -0.139579    0.400429    11.00000    0.04618    0.04459 =
         0.03052   -0.00507    0.00127    0.00676
AFIX  43
H29   2    0.288436   -0.151224    0.334338    11.00000   -1.20000
AFIX   0
C30   1    0.256089   -0.065891    0.449253    11.00000    0.03558    0.03756 =
         0.02637    0.00080   -0.00034    0.00207
AFIX  43
H30   2    0.297164   -0.028543    0.414185    11.00000   -1.20000
AFIX   0
HKLF 4


REM  dm16699 in P2(1)/c
REM R1 =  0.0455 for    4845 Fo > 4sig(Fo)  and  0.1020 for all    7920 data
REM    304 parameters refined using      0 restraints

END

WGHT      0.0607      0.0000

REM Highest difference peak  0.442,  deepest hole -0.747,  1-sigma level  0.068
Q1    1   0.8746  0.0214  0.0609  11.00000  0.05    0.44
Q2    1   0.2720  0.1675  0.8865  11.00000  0.05    0.38
Q3    1   0.2572  0.0616  0.7623  11.00000  0.05    0.38
Q4    1   0.2673  0.1564  0.8013  11.00000  0.05    0.37
Q5    1   0.1753  0.0965  0.8806  11.00000  0.05    0.36
Q6    1   0.4402 -0.0213  0.7333  11.00000  0.05    0.34
Q7    1   0.3010 -0.0106  0.7219  11.00000  0.05    0.33
Q8    1   0.3768  0.2167  0.7662  11.00000  0.05    0.31
Q9    1   0.2431 -0.2090  0.3508  11.00000  0.05    0.30
Q10   1   0.3446 -0.0832  0.7615  11.00000  0.05    0.29
;
_shelx_res_checksum               13369
_shelx_hkl_file
;
   0   0   1    0.01    0.07
   0   0   1    0.00    0.08
   0   0   2   45.97    0.98
   0   0   2   46.13    1.14
   0   0   3    0.58    0.37
   0   0   3   -0.20    0.33
   0   0   4    3.91    0.42
   0   0   4    4.61    0.53
   0   0   5    0.10    0.34
   0   0   5   -0.37    0.37
   0   0   6   32.24    1.48
   0   0   6   35.54    1.23
   0   0   7    0.34    0.53
   0   0   7    0.04    0.53
   0   0   8    0.07    0.61
   0   0   8    0.69    0.64
   0   0   9    0.05    0.74
   0   0   9    0.46    0.72
   0   0  10    6.14    1.05
   0   0  10    7.30    0.99
   0   0  11   -0.70    0.69
   0   0  12    1.93    0.91
   0   0  13    0.49    0.91
   0   0  14    1.37    1.04
   0   0  15   -1.10    0.95
   0   0  16    2.61    1.26
  -1   0  16   -0.38    1.12
  -1   0  15   -0.55    1.02
  -1   0  14    2.82    1.13
  -1   0  13   -1.13    0.80
  -1   0  12   25.17    1.97
  -1   0  11    0.27    0.75
  -1   0  11   -1.01    0.78
  -1   0  10    1.30    0.81
  -1   0  10    0.86    0.76
  -1   0   9    0.06    0.72
  -1   0   9   -0.55    0.67
  -1   0   8    6.53    0.92
  -1   0   8    6.59    0.82
  -1   0   7    0.42    0.52
  -1   0   7   -0.11    0.57
  -1   0   6   39.42    1.67
  -1   0   6   42.21    1.39
  -1   0   5    0.00    0.36
  -1   0   5   -0.15    0.41
   1   0  -4   11.49    0.69
  -1   0   4   11.39    0.72
  -1   0   4   11.63    0.96
   1   0  -3    0.04    0.33
  -1   0   3    0.42    0.45
   1   0  -2   20.97    0.67
  -1   0   2   21.10    0.77
   1   0  -1   -0.03    0.12
   1   0   1   -0.39    0.11
   1   0   1   -0.27    0.11
   1   0   1   -0.27    0.11
   1   0   2   74.10    1.63
   1   0   2   75.26    1.46
   1   0   3    0.05    0.33
   1   0   3    0.08    0.34
   1   0   4  249.68    4.52
   1   0   4  251.22    4.83
   1   0   5    0.12    0.37
   1   0   5    0.18    0.36
   1   0   6   73.99    1.87
   1   0   6   73.44    2.22
   1   0   7    0.25    0.53
   1   0   7   -0.16    0.49
   1   0   8    1.07    0.67
   1   0   8    1.24    0.68
   1   0   9   -0.45    0.73
   1   0   9    0.80    0.71
   1   0  10    4.60    0.94
   1   0  10    5.88    0.94
   1   0  11    0.26    0.74
   1   0  12   59.95    2.75
   1   0  13    0.70    0.91
   1   0  14   -0.45    0.90
   1   0  15   -0.81    0.92
   1   0  16   -1.16    1.03
  -2   0  16   -0.14    1.17
  -2   0  15   -0.47    1.08
  -2   0  14   -0.29    0.96
  -2   0  13   -2.15    0.83
  -2   0  12   -0.16    0.87
  -2   0  11   -0.33    0.76
  -2   0  11    0.73    0.80
  -2   0  10   35.12    2.12
  -2   0  10   42.33    1.87
  -2   0   9    0.37    0.80
  -2   0   9    0.40    0.74
  -2   0   8   63.55    2.46
  -2   0   8   67.47    2.11
  -2   0   7    0.16    0.64
  -2   0   7   -0.27    0.52
  -2   0   6   17.75    1.04
  -2   0   6   21.96    1.32
   2   0  -5    0.18    0.36
  -2   0   5    0.17    0.46
   2   0  -4    1.40    0.38
  -2   0   4    1.59    0.47
   2   0  -3   -0.11    0.34
  -2   0   3    0.17    0.45
   2   0  -2   62.27    1.48
   2   0  -1    0.03    0.09
   2   0  -1   -0.28    0.19
   2   0   0  713.90   12.01
   2   0   0  705.25   11.09
   2   0   1   -0.04    0.16
   2   0   1    0.20    0.18
   2   0   1   -0.04    0.16
   2   0   2  315.40    5.66
   2   0   2  312.65    5.43
   2   0   3    0.86    0.31
   2   0   3    0.86    0.33
   2   0   4   82.43    1.80
   2   0   4   81.92    2.11
   2   0   5    0.23    0.39
   2   0   5   -0.18    0.37
   2   0   6   72.23    2.25
   2   0   6   75.20    1.88
   2   0   7    0.76    0.56
   2   0   7    0.29    0.54
   2   0   8   60.26    1.96
   2   0   8   60.57    2.34
   2   0   9    0.63    0.71
   2   0   9   -0.09    0.73
   2   0  10   17.88    1.61
   2   0  11   -0.52    0.68
   2   0  12    9.70    1.35
   2   0  13   -0.32    0.79
   2   0  14   12.85    1.66
   2   0  15   -0.40    0.97
   2   0  16   12.52    1.78
  -3   0  16    2.27    1.36
  -3   0  15   -1.75    1.09
  -3   0  14   -0.96    0.98
  -3   0  13   -0.93    0.88
  -3   0  12    1.18    0.90
  -3   0  12   -1.12    0.85
  -3   0  11    0.12    0.79
  -3   0  11    0.49    0.87
  -3   0  10   11.65    1.35
  -3   0  10   15.57    1.37
  -3   0   9    1.33    0.92
  -3   0   9   -0.38    0.73
  -3   0   8   92.80    2.61
  -3   0   8   96.86    3.05
   3   0  -7   -0.33    0.51
  -3   0   7   -0.73    0.54
  -3   0   7    1.74    0.73
   3   0  -6   70.49    2.04
  -3   0   6   71.69    2.34
   3   0  -5   -0.04    0.40
  -3   0   5    0.16    0.53
   3   0  -4  199.08    4.02
  -3   0   4  198.17    4.08
   3   0  -3   -0.24    0.31
  -3   0   3   -0.63    0.37
   3   0  -2    8.20    0.70
   3   0  -1   -0.36    0.31
   3   0  -1    0.26    0.24
   3   0   0   31.17    1.01
   3   0   0   30.32    0.87
   3   0   0   30.69    0.98
   3   0   1   -0.16    0.27
   3   0   1   -0.19    0.26
   3   0   1    0.06    0.24
   3   0   2  507.99    8.98
   3   0   2  513.22    8.77
   3   0   3    0.18    0.25
   3   0   3    0.27    0.28
   3   0   4  281.95    5.53
   3   0   4  285.11    5.09
   3   0   5    0.25    0.39
   3   0   5   -0.07    0.36
   3   0   6   19.29    1.04
   3   0   6   20.67    1.32
   3   0   7    0.00    0.55
   3   0   7    0.39    0.55
   3   0   8    6.54    0.96
   3   0   8    7.16    0.82
   3   0   9    0.47    0.66
   3   0  10    1.17    0.73
   3   0  11    0.44    0.73
   3   0  12    5.67    1.13
   3   0  13    1.48    0.94
   3   0  14   13.31    1.68
   3   0  15    1.31    1.11
  -4   0  16   -1.85    1.15
  -4   0  15   -3.11    1.06
  -4   0  14    3.16    1.25
  -4   0  13   -0.76    0.97
  -4   0  12    7.65    1.18
  -4   0  12    5.87    1.25
  -4   0  11    0.65    0.83
  -4   0  11   -1.26    0.85
  -4   0  10   14.58    1.43
  -4   0  10   15.71    1.55
  -4   0   9    0.08    0.81
  -4   0   9    1.09    0.96
   4   0  -8    1.39    0.71
  -4   0   8   -0.46    0.70
  -4   0   8    1.75    0.94
   4   0  -7    0.03    0.60
  -4   0   7    0.60    0.80
   4   0  -6  354.10    6.95
  -4   0   6  355.29    7.05
   4   0  -5    0.30    0.45
  -4   0   5    0.70    0.58
   4   0  -4   49.94    1.60
  -4   0   4   49.13    1.72
   4   0  -3   -0.03    0.35
   4   0  -2   39.93    1.30
   4   0  -1    0.05    0.26
   4   0  -1   -0.69    0.29
   4   0   0  294.43    5.51
   4   0   0  299.13    5.48
   4   0   1    0.25    0.30
   4   0   1    0.16    0.27
   4   0   2    0.84    0.31
   4   0   2    1.05    0.32
   4   0   3    0.41    0.28
   4   0   3    0.32    0.30
   4   0   4  149.12    3.42
   4   0   4  147.80    2.91
   4   0   5   -0.40    0.31
   4   0   5   -0.24    0.38
   4   0   6  106.88    2.98
   4   0   6  107.68    2.36
   4   0   7    0.69    0.57
   4   0   7    0.16    0.49
   4   0   8   -0.38    0.53
   4   0   8   -0.29    0.58
   4   0   9   -0.02    0.64
   4   0  10    4.82    0.98
   4   0  11    0.25    0.75
   4   0  12   -0.81    0.75
   4   0  13   -0.11    0.79
   4   0  14    1.53    1.07
   4   0  15   -0.63    0.98
  -5   0  16    4.94    1.59
  -5   0  15   -3.10    1.08
  -5   0  14   -0.94    1.08
  -5   0  13   -2.07    0.96
  -5   0  13    2.02    1.04
  -5   0  12    1.50    0.95
  -5   0  12    0.73    1.06
  -5   0  11    0.61    0.87
  -5   0  11   -0.58    0.93
  -5   0  10    2.57    0.88
  -5   0  10    2.67    1.03
   5   0  -9    0.46    0.75
  -5   0   9   -0.44    0.98
  -5   0   9   -0.43    0.79
   5   0  -8   67.75    2.40
  -5   0   8   63.53    2.71
   5   0  -7    0.62    0.63
  -5   0   7    0.95    0.88
   5   0  -6   12.76    1.18
  -5   0   6   12.01    1.13
   5   0  -5   -0.32    0.47
  -5   0   5   -0.07    0.57
   5   0  -4    0.86    0.49
   5   0  -3   -0.16    0.38
   5   0  -2  194.21    4.04
   5   0  -1    0.06    0.28
   5   0  -1   -0.39    0.33
   5   0   0    4.05    0.51
   5   0   0    3.61    0.46
   5   0   1   -0.11    0.32
   5   0   1    0.05    0.27
   5   0   2    8.24    0.80
   5   0   2    7.68    0.66
   5   0   3    0.39    0.35
   5   0   3    0.26    0.32
   5   0   4   25.12    0.98
   5   0   4   27.43    1.34
   5   0   5    0.20    0.34
   5   0   5    0.38    0.44
   5   0   6  101.39    2.98
   5   0   6  100.62    2.27
   5   0   7    0.46    0.57
   5   0   7   -0.14    0.43
   5   0   8   33.36    1.94
   5   0   9    0.19    0.62
   5   0  10   44.86    2.35
   5   0  11   -0.29    0.71
   5   0  12    0.59    0.86
   5   0  13    1.03    0.90
   5   0  14    9.30    1.51
   5   0  15   -1.73    0.85
  -6   0  15   -1.99    1.17
  -6   0  14   28.32    2.59
  -6   0  13   -0.50    1.06
  -6   0  13    0.93    0.97
  -6   0  12    6.82    1.40
  -6   0  12    9.11    1.32
  -6   0  11    1.24    0.85
  -6   0  11   -0.91    1.01
  -6   0  10    4.41    1.00
  -6   0  10    2.93    1.14
   6   0  -9    0.01    0.76
  -6   0   9    0.34    1.01
   6   0  -8   27.19    1.70
  -6   0   8   26.99    2.16
   6   0  -7    0.22    0.65
  -6   0   7    0.15    0.92
   6   0  -6   18.06    1.38
  -6   0   6   20.23    1.77
   6   0  -5   -0.14    0.52
  -6   0   5   -0.45    0.62
   6   0  -4   46.62    1.74
   6   0  -3   -0.48    0.43
   6   0  -2    7.01    0.75
   6   0  -1    0.14    0.41
   6   0  -1   -0.34    0.29
   6   0   0  230.74    4.72
   6   0   0  233.21    4.68
   6   0   1   -0.11    0.32
   6   0   1   -0.21    0.34
   6   0   2    6.48    0.63
   6   0   2    5.85    0.66
   6   0   3    0.00    0.35
   6   0   3   -0.05    0.37
   6   0   4   70.29    2.27
   6   0   4   69.72    1.83
   6   0   5    0.21    0.48
   6   0   5    0.25    0.40
   6   0   6    6.10    0.85
   6   0   6    7.43    0.65
   6   0   7    0.66    0.62
   6   0   8    8.46    1.11
   6   0   9   -0.14    0.61
   6   0  10   28.75    2.03
   6   0  11    0.37    0.81
   6   0  12    4.38    1.13
   6   0  13   -0.34    0.88
   6   0  14   -0.30    0.96
  -7   0  15   -1.26    1.26
  -7   0  14    4.50    1.50
  -7   0  14    9.34    1.49
  -7   0  13   -1.41    1.17
  -7   0  13    1.10    1.01
  -7   0  12    9.23    1.33
  -7   0  12    9.47    1.61
  -7   0  11   -0.08    1.08
  -7   0  11   -0.35    0.85
   7   0 -10    0.55    0.81
  -7   0  10   -0.07    0.82
  -7   0  10   -0.59    1.00
   7   0  -9    0.50    0.76
  -7   0   9    0.43    0.99
   7   0  -8    7.86    1.14
  -7   0   8    6.05    1.27
   7   0  -7    0.42    0.74
  -7   0   7   -0.91    0.93
   7   0  -6   17.31    1.41
  -7   0   6   18.65    1.81
   7   0  -5   -0.03    0.60
   7   0  -4   15.17    1.19
   7   0  -3    0.01    0.49
   7   0  -2  339.28    6.74
   7   0  -1   -0.11    0.34
   7   0  -1    0.43    0.49
   7   0   0   80.60    2.31
   7   0   0   80.02    2.29
   7   0   1    0.27    0.37
   7   0   1    0.12    0.44
   7   0   2   40.96    1.66
   7   0   2   42.05    1.49
   7   0   3   -0.41    0.39
   7   0   3   -0.15    0.39
   7   0   4   14.89    0.97
   7   0   4   17.45    1.29
   7   0   5    0.42    0.44
   7   0   5   -0.03    0.50
   7   0   6   37.74    1.37
   7   0   6   37.20    1.93
   7   0   7    0.62    0.61
   7   0   8   10.98    1.23
   7   0   9   -0.88    0.56
   7   0  10    0.03    0.71
   7   0  11   -0.11    0.74
   7   0  12    2.50    1.05
   7   0  13   -0.78    0.86
   7   0  14    0.98    1.01
  -8   0  15   -3.38    1.27
  -8   0  14   -0.73    1.08
  -8   0  14   -0.14    1.39
  -8   0  13   -1.36    1.24
  -8   0  13    0.64    1.06
  -8   0  12   -1.38    1.09
  -8   0  12   -0.21    0.89
  -8   0  11    0.21    0.92
  -8   0  11    1.89    1.24
   8   0 -10    2.75    0.97
  -8   0  10    2.30    0.99
  -8   0  10    2.56    1.22
   8   0  -9   -1.26    0.68
  -8   0   9   -0.89    0.99
   8   0  -8   25.56    1.75
  -8   0   8   24.73    2.15
   8   0  -7   -1.19    0.68
  -8   0   7    0.52    1.05
   8   0  -6   25.52    1.69
  -8   0   6   25.17    2.09
   8   0  -5   -0.32    0.65
   8   0  -4    6.27    0.95
   8   0  -3   -0.14    0.57
   8   0  -2  104.41    2.90
   8   0  -1   -0.04    0.50
   8   0  -1    0.03    0.43
   8   0   0  271.73    5.72
   8   0   0  271.11    5.63
   8   0   1   -0.74    0.38
   8   0   1   -0.32    0.47
   8   0   2   19.65    1.20
   8   0   2   20.86    1.33
   8   0   3   -0.19    0.46
   8   0   3   -0.08    0.44
   8   0   4    0.51    0.52
   8   0   4    0.15    0.47
   8   0   5   -0.49    0.46
   8   0   5    0.01    0.53
   8   0   6    0.12    0.48
   8   0   6    0.07    0.58
   8   0   7    0.39    0.60
   8   0   8    7.88    1.14
   8   0   9    0.12    0.70
   8   0  10   33.93    2.23
   8   0  11    0.65    0.82
   8   0  12    0.26    0.88
   8   0  13    1.43    1.01
   8   0  14    1.13    1.05
  -9   0  14   -0.60    1.37
  -9   0  14    3.82    1.30
  -9   0  13   -1.38    1.31
  -9   0  13    0.26    1.05
  -9   0  12   29.63    2.13
  -9   0  12   21.22    2.14
   9   0 -11    0.44    0.90
  -9   0  11   -0.28    1.19
  -9   0  11   -0.63    0.91
   9   0 -10    0.55    0.89
  -9   0  10    0.51    1.16
   9   0  -9    0.60    0.85
  -9   0   9   -0.60    1.00
   9   0  -8   10.00    1.29
  -9   0   8    8.64    1.36
   9   0  -7    0.21    0.77
  -9   0   7    0.89    0.96
   9   0  -6    1.52    0.91
   9   0  -5   -1.03    0.69
   9   0  -4    0.70    0.74
   9   0  -3   -0.45    0.62
   9   0  -2   18.08    1.35
   9   0  -1   -0.08    0.59
   9   0  -1    0.37    0.50
   9   0   0   30.45    1.62
   9   0   0   29.41    1.56
   9   0   1    0.36    0.46
   9   0   1   -0.32    0.56
   9   0   2   66.90    2.40
   9   0   2   72.06    2.27
   9   0   3   -0.35    0.53
   9   0   3   -0.15    0.47
   9   0   4   50.42    2.18
   9   0   4   47.39    1.74
   9   0   5    0.25    0.57
   9   0   5    0.20    0.49
   9   0   6    2.67    0.76
   9   0   7    0.17    0.62
   9   0   8    0.51    0.70
   9   0   9    0.13    0.70
   9   0  10    5.59    1.14
   9   0  11   -1.15    0.74
   9   0  12    6.43    1.33
   9   0  13    0.22    0.93
 -10   0  14   -1.60    1.38
 -10   0  14    1.03    1.25
 -10   0  13    1.34    1.15
 -10   0  13   -1.41    1.30
 -10   0  12    3.66    1.58
 -10   0  12    9.57    1.52
  10   0 -11   -0.09    0.92
 -10   0  11   -0.12    0.98
 -10   0  11   -1.29    1.17
  10   0 -10   24.23    1.95
 -10   0  10   26.95    2.46
  10   0  -9    0.30    0.85
 -10   0   9    1.82    1.18
  10   0  -8   21.91    1.77
 -10   0   8   25.25    2.20
  10   0  -7   -0.46    0.79
 -10   0   7   -0.70    0.89
  10   0  -6    7.22    1.18
  10   0  -5   -0.81    0.71
  10   0  -4    2.80    0.92
  10   0  -3    0.52    0.71
  10   0  -2   34.79    1.80
  10   0  -1    0.47    0.67
  10   0  -1   -0.22    0.50
  10   0   0    7.78    1.01
  10   0   0    7.57    0.94
  10   0   1    0.34    0.54
  10   0   1    0.17    0.65
  10   0   2   26.13    1.49
  10   0   2   27.48    1.66
  10   0   3    0.46    0.64
  10   0   3    0.71    0.57
  10   0   4    0.09    0.53
  10   0   4    0.66    0.58
  10   0   5    0.53    0.60
  10   0   5    0.20    0.55
  10   0   6   16.84    1.56
  10   0   7    0.05    0.63
  10   0   8    1.01    0.76
  10   0   9    0.68    0.74
  10   0  10   13.59    1.68
  10   0  11    0.45    0.92
  10   0  12    3.81    1.24
 -11   0  13    1.71    1.21
 -11   0  13   -2.26    1.38
 -11   0  12    7.01    1.79
 -11   0  12    8.19    1.55
  11   0 -11   -0.55    0.94
 -11   0  11    0.43    1.05
 -11   0  11   -1.59    1.21
  11   0 -10   -0.08    0.91
 -11   0  10   -0.83    1.17
  11   0  -9    0.12    0.89
 -11   0   9    0.19    1.13
  11   0  -8   26.44    1.99
 -11   0   8   28.21    2.27
  11   0  -7    0.00    0.82
 -11   0   7    0.84    1.00
  11   0  -6   16.00    1.62
  11   0  -5    0.71    0.80
  11   0  -4    6.29    1.10
  11   0  -3    0.13    0.73
  11   0  -2   19.13    1.51
  11   0  -1    0.16    0.56
  11   0  -1    0.37    0.70
  11   0   0    8.77    1.08
  11   0   0    7.79    1.01
  11   0   1   -0.01    0.62
  11   0   1   -0.05    0.55
  11   0   2  127.52    3.73
  11   0   2  131.57    3.52
  11   0   3   -0.27    0.49
  11   0   3    0.25    0.60
  11   0   4    5.22    0.97
  11   0   4    6.56    0.90
  11   0   5    0.65    0.63
  11   0   6   -0.26    0.59
  11   0   7    1.43    0.76
  11   0   8    5.48    1.14
  11   0   9   -0.30    0.70
  11   0  10    0.40    0.87
  11   0  11    0.27    0.88
  11   0  12    0.55    0.96
 -12   0  13   -2.01    1.40
 -12   0  13    0.64    1.19
 -12   0  12    0.74    1.18
 -12   0  12    0.03    1.50
  12   0 -11   -0.12    1.00
 -12   0  11    0.20    1.11
 -12   0  11   -3.22    1.25
  12   0 -10   -1.15    0.89
 -12   0  10   -0.12    1.25
  12   0  -9   -0.76    0.91
 -12   0   9   -0.43    1.12
  12   0  -8    2.84    1.05
 -12   0   8    0.59    1.08
  12   0  -7   -0.29    0.86
 -12   0   7   -0.72    0.94
  12   0  -6   47.38    2.46
  12   0  -5    0.04    0.81
  12   0  -4  112.47    3.66
  12   0  -3   -0.33    0.75
  12   0  -2    4.54    1.00
  12   0  -1   -0.43    0.67
  12   0  -1    1.03    0.63
  12   0   0   16.83    1.38
  12   0   0   16.10    1.49
  12   0   1    0.09    0.55
  12   0   1    0.60    0.66
  12   0   2    6.17    0.96
  12   0   2    5.14    0.94
  12   0   3    0.98    0.69
  12   0   3    0.78    0.66
  12   0   4    9.88    1.23
  12   0   4    9.65    1.08
  12   0   5   -0.47    0.58
  12   0   6   29.88    2.00
  12   0   7   -0.11    0.68
  12   0   8   -0.27    0.70
  12   0   9   -0.83    0.73
  12   0  10    2.18    1.03
  12   0  11    0.21    0.89
 -13   0  12    6.35    1.84
 -13   0  12    8.43    1.60
  13   0 -11   -0.11    1.07
 -13   0  11   -1.74    1.38
 -13   0  11    0.67    1.19
  13   0 -10   -0.18    1.00
 -13   0  10   -0.51    1.32
  13   0  -9   -0.09    0.94
 -13   0   9   -0.05    1.21
  13   0  -8    7.24    1.35
 -13   0   8    4.37    1.30
  13   0  -7    0.18    0.87
  13   0  -6    8.42    1.36
  13   0  -5   -0.10    0.89
  13   0  -4    1.87    0.97
  13   0  -3    0.52    0.83
  13   0  -2    6.70    1.20
  13   0  -1    0.30    0.63
  13   0  -1   -0.43    0.72
  13   0   0    0.52    0.65
  13   0   0    0.63    0.73
  13   0   1   -0.88    0.56
  13   0   1    0.57    0.75
  13   0   2   16.50    1.44
  13   0   2   12.87    1.40
  13   0   3    0.13    0.63
  13   0   3   -0.41    0.62
  13   0   4    1.11    0.76
  13   0   5   -0.70    0.60
  13   0   6   27.75    2.05
  13   0   7    0.24    0.74
  13   0   8   16.59    1.80
  13   0   9   -0.04    0.83
  13   0  10    1.30    1.01
  14   0 -11   -0.70    1.05
 -14   0  11   -1.63    1.40
 -14   0  11   -0.02    1.17
  14   0 -10   -0.82    1.06
 -14   0  10    0.22    1.46
  14   0  -9    0.00    0.98
 -14   0   9   -0.56    1.27
  14   0  -8   -0.11    0.95
 -14   0   8    0.16    1.17
  14   0  -7    0.18    0.95
  14   0  -6   12.10    1.59
  14   0  -5    0.81    0.97
  14   0  -4    6.54    1.29
  14   0  -3   -0.37    0.85
  14   0  -2    0.50    0.86
  14   0  -1   -0.08    0.83
  14   0   0   37.67    2.15
  14   0   0   32.45    1.97
  14   0   1   -0.23    0.62
  14   0   1    0.42    0.77
  14   0   2    5.63    1.09
  14   0   2    7.82    1.19
  14   0   3    0.50    0.70
  14   0   4    1.95    0.83
  14   0   5   -0.60    0.68
  14   0   6    5.15    1.17
  14   0   7    1.41    0.89
  14   0   8    2.24    0.99
  14   0   9    0.00    0.81
  15   0 -10    0.88    1.20
 -15   0  10   -0.73    1.38
  15   0  -9    0.60    1.06
 -15   0   9   -0.12    1.34
  15   0  -8   -0.20    0.96
 -15   0   8    0.38    1.24
  15   0  -7   -0.39    0.95
  15   0  -6    1.65    1.12
  15   0  -5   -0.23    0.89
  15   0  -4    4.39    1.19
  15   0  -3    1.07    0.98
  15   0  -2   74.85    3.09
  15   0  -1    0.12    0.85
  15   0   0    0.82    0.86
  15   0   0    0.39    0.74
  15   0   1   -0.38    0.68
  15   0   1    0.54    0.85
  15   0   2    1.65    0.89
  15   0   2    1.10    0.84
  15   0   3   -0.41    0.71
  15   0   4    0.14    0.74
  15   0   5   -1.19    0.64
  15   0   6    4.05    1.15
  15   0   7    1.18    0.85
  15   0   8    1.21    0.94
  16   0  -9   -0.03    1.13
 -16   0   9    0.53    1.38
  16   0  -8    0.63    1.18
 -16   0   8    1.69    1.35
  16   0  -7    0.94    1.10
  16   0  -6   18.07    2.04
  16   0  -5   -0.12    1.02
  16   0  -4   -0.84    0.90
  16   0  -3    0.47    1.00
  16   0  -2    2.15    1.06
  16   0  -1    0.60    0.96
  16   0   0   28.33    2.06
  16   0   1    0.34    0.90
  16   0   1    0.23    0.81
  16   0   2    1.74    0.93
  16   0   3    0.14    0.78
  16   0   4    2.45    0.99
  16   0   5    0.06    0.79
  16   0   6   -0.25    0.78
  17   0  -7    1.52    1.22
  17   0  -6    3.06    1.30
  17   0  -5    0.02    1.07
  17   0  -4    0.15    1.00
  17   0  -3    0.72    1.02
  17   0  -2    3.41    1.21
  17   0  -1    1.62    1.05
  17   0   0   26.74    2.12
  17   0   1   -1.16    0.75
  17   0   2    1.86    0.99
  17   0   3   -0.28    0.79
  17   0   4    4.50    1.18
  18   0  -4    2.27    1.27
  18   0  -3    0.01    1.05
  18   0  -2    1.00    1.11
  18   0  -1    0.78    1.03
  18   1   0    1.65    1.07
  18   1  -1    5.32    1.30
  18   1  -2    8.36    1.55
  18   1  -3    0.86    1.07
  18   1  -4    0.84    1.09
  17   1   4    0.06    0.85
  17   1   3   11.88    1.65
  17   1   2    1.04    0.92
  17   1   1    0.74    0.96
  17   1   1    2.00    0.98
  17   1   0    1.13    1.04
  17   1  -1    5.29    1.26
  17   1  -2    6.09    1.40
  17   1  -3    1.65    1.08
  17   1  -4    1.87    1.09
  17   1  -5    3.17    1.27
  17   1  -6    2.15    1.21
  17   1  -7    1.04    1.17
  16   1   6    1.71    0.96
  16   1   5    0.29    0.83
  16   1   4    1.45    0.90
  16   1   3    3.81    1.07
  16   1   2    3.92    1.11
  16   1   1   16.42    1.70
  16   1   1   15.02    1.67
  16   1   0    1.76    1.03
  16   1  -1   12.85    1.60
  16   1  -2    2.12    1.04
  16   1  -3    9.35    1.52
  16   1  -4    1.43    1.05
  16   1  -5    3.17    1.26
  16   1  -6    2.29    1.21
  16   1  -7    3.63    1.26
 -16  -1   8    4.55    1.53
  16   1  -8    6.87    1.49
 -16  -1   9    0.14    1.36
  16   1  -9    0.42    1.18
  15   1   8   -0.74    0.80
  15   1   7    6.10    1.27
  15   1   6    0.59    0.87
  15   1   5    2.99    0.98
  15   1   4    0.66    0.80
  15   1   3    5.30    1.12
  15   1   2    1.81    0.88
  15   1   2    2.22    0.94
  15   1   1    4.40    1.03
  15   1   1    3.97    1.04
  15   1   0    8.68    1.29
  15   1   0    7.71    1.23
  15   1  -1   -0.38    0.84
  15   1  -2    1.55    1.01
  15   1  -3    2.11    1.04
  15   1  -4    6.55    1.33
  15   1  -5    5.18    1.25
  15   1  -6    2.22    1.11
  15   1  -7   -0.10    1.00
 -15  -1   8    1.38    1.33
  15   1  -8    1.59    1.10
 -15  -1   9    3.15    1.52
  15   1  -9    2.65    1.21
 -15  -1  10    2.42    1.56
  15   1 -10   -0.06    1.10
  14   1   9    1.13    0.93
  14   1   8    0.06    0.86
  14   1   7   26.42    2.15
  14   1   6    1.25    0.86
  14   1   5    1.00    0.80
  14   1   4   16.24    1.65
  14   1   3    2.71    0.89
  14   1   3    1.05    0.80
  14   1   2    2.54    0.84
  14   1   2    4.58    1.01
  14   1   1    5.28    1.04
  14   1   1    5.57    1.06
  14   1   0    1.06    0.80
  14   1   0    0.44    0.84
  14   1  -1   47.32    2.36
  14   1  -2   -0.59    0.76
  14   1  -3    8.51    1.34
  14   1  -4    3.06    1.06
  14   1  -5    2.54    1.05
  14   1  -6    0.29    0.89
  14   1  -7   -0.57    0.86
 -14  -1   8    1.75    1.29
  14   1  -8    0.00    0.97
 -14  -1   9   -1.60    1.24
  14   1  -9    0.40    1.00
 -14  -1  10   -0.16    1.36
  14   1 -10    0.23    1.07
 -14  -1  11   -0.93    1.48
  14   1 -11    0.16    1.10
  13   1  10    0.25    0.87
  13   1   9   -0.56    0.75
  13   1   8    2.21    0.95
  13   1   7    3.05    0.96
  13   1   6    1.53    0.86
  13   1   5   17.75    1.70
  13   1   4    2.44    0.85
  13   1   3    0.93    0.68
  13   1   3    1.43    0.79
  13   1   2    0.60    0.75
  13   1   2    1.05    0.68
  13   1   1    3.95    0.92
  13   1   1    4.75    0.97
  13   1   0   11.00    1.30
  13   1   0   10.58    1.29
  13   1  -1    1.62    0.85
  13   1  -2   -0.31    0.78
  13   1  -3   -0.25    0.80
  13   1  -4   -0.19    0.84
  13   1  -5   57.61    2.70
  13   1  -6    1.73    0.96
  13   1  -7    4.82    1.22
 -13  -1   8   -0.12    1.09
  13   1  -8    1.67    1.04
 -13  -1   9   -2.05    1.14
  13   1  -9    0.37    0.94
 -13  -1  10    6.71    1.70
  13   1 -10    4.50    1.31
 -13  -1  11   -0.41    1.43
  13   1 -11   -0.99    1.02
 -13  -1  12   -0.04    1.55
 -13  -1  12    2.43    1.29
  13   1 -12   -0.96    1.04
  12   1  11   -0.08    0.92
  12   1  10    0.39    0.86
  12   1   9    5.09    1.19
  12   1   8    0.76    0.80
  12   1   7   16.39    1.71
  12   1   6    0.62    0.71
  12   1   5   -0.07    0.64
  12   1   4    0.75    0.66
  12   1   4    0.32    0.69
  12   1   3    4.76    0.95
  12   1   3    4.92    0.93
  12   1   2    5.25    0.94
  12   1   2    4.31    0.90
  12   1   1   24.57    1.62
  12   1   1   25.50    1.73
  12   1   0    0.88    0.63
  12   1   0    0.09    0.71
  12   1  -1    7.18    1.11
  12   1  -1    6.61    0.99
  12   1  -2    9.86    1.25
  12   1  -3    0.19    0.78
  12   1  -4   14.25    1.57
  12   1  -5   16.23    1.66
  12   1  -6    5.22    1.17
 -12  -1   7   37.20    2.48
  12   1  -7   33.93    2.15
 -12  -1   8    1.76    1.16
  12   1  -8    2.91    1.05
 -12  -1   9    9.45    1.62
  12   1  -9   12.64    1.64
 -12  -1  10    2.06    1.38
  12   1 -10    2.46    1.08
 -12  -1  11   -1.25    1.35
  12   1 -11    0.02    1.01
 -12  -1  12   -0.13    1.11
 -12  -1  12   -1.55    1.41
  12   1 -12   -0.03    1.11
 -12  -1  13   -1.51    1.55
 -12  -1  13    1.35    1.21
  11   1  12   -0.11    0.90
  11   1  11    0.33    0.91
  11   1  10   10.73    1.57
  11   1   9    0.96    0.88
  11   1   8   -0.15    0.73
  11   1   7    3.62    0.93
  11   1   6    1.20    0.73
  11   1   5   23.04    1.71
  11   1   4    4.44    0.91
  11   1   4    4.92    0.87
  11   1   3   10.83    1.11
  11   1   3   10.81    1.21
  11   1   2   15.07    1.36
  11   1   2   12.78    1.26
  11   1   1    0.47    0.66
  11   1   1    0.34    0.59
  11   1   0    9.06    1.12
  11   1   0    8.96    1.08
  11   1  -1    0.66    0.72
  11   1  -1   -0.41    0.52
  11   1  -2   14.69    1.45
  11   1  -3    0.46    0.75
  11   1  -4    8.60    1.22
  11   1  -5   42.48    2.21
  11   1  -6    7.43    1.23
 -11  -1   7    0.06    0.99
  11   1  -7   -0.19    0.75
 -11  -1   8   -0.46    1.03
  11   1  -8    0.38    0.87
 -11  -1   9   10.07    1.59
  11   1  -9    8.40    1.36
 -11  -1  10    2.12    1.36
  11   1 -10    2.12    1.01
 -11  -1  11    2.05    1.43
  11   1 -11   -0.80    0.91
 -11  -1  12   -0.11    1.47
 -11  -1  12    1.28    1.14
  11   1 -12   -0.20    1.01
 -11  -1  13   13.56    2.15
 -11  -1  13   16.70    1.88
  10   1  12    0.33    0.95
  10   1  11    6.71    1.32
  10   1  10    0.75    0.84
  10   1   9    2.64    0.94
  10   1   8    1.59    0.83
  10   1   7    0.67    0.67
  10   1   6    1.89    0.76
  10   1   5   11.91    1.28
  10   1   5   14.15    1.20
  10   1   4    1.86    0.64
  10   1   4    1.66    0.66
  10   1   3   75.40    2.42
  10   1   3   73.94    2.69
  10   1   2   14.80    1.40
  10   1   2   13.65    1.33
  10   1   1   26.98    1.61
  10   1   1   23.69    1.59
  10   1   0    0.42    0.64
  10   1   0    0.62    0.57
  10   1  -1    2.83    0.71
  10   1  -1    3.03    0.82
  10   1  -2   12.85    1.31
  10   1  -3    1.24    0.76
  10   1  -4    9.32    1.21
  10   1  -5   -0.21    0.73
  10   1  -6    7.38    1.14
 -10  -1   7   29.68    2.23
  10   1  -7   30.79    1.97
 -10  -1   8   12.94    1.60
  10   1  -8   13.82    1.53
 -10  -1   9   17.13    1.82
  10   1  -9   15.93    1.61
 -10  -1  10    1.47    1.24
  10   1 -10    0.93    0.89
 -10  -1  11    0.92    1.32
  10   1 -11    2.11    1.07
 -10  -1  12    6.62    1.39
 -10  -1  12    0.77    1.44
  10   1 -12    2.51    1.19
 -10  -1  13    1.30    1.53
 -10  -1  13    3.81    1.30
 -10  -1  14   -1.04    1.47
 -10  -1  14    1.04    1.17
   9   1  13    2.94    1.18
   9   1  12   -0.02    0.91
   9   1  11    1.69    0.99
   9   1  10    1.08    0.84
   9   1   9    3.19    0.97
   9   1   8    0.51    0.68
   9   1   7    0.18    0.62
   9   1   6   10.44    1.18
   9   1   5    1.74    0.67
   9   1   5    1.29    0.60
   9   1   4    8.22    1.04
   9   1   4    9.93    0.97
   9   1   3   13.71    1.24
   9   1   3   11.55    1.17
   9   1   2    1.97    0.67
   9   1   2    1.62    0.59
   9   1   1   52.69    1.97
   9   1   1   50.79    2.05
   9   1   0   -0.42    0.56
   9   1   0    0.96    0.53
   9   1  -1   89.09    2.75
   9   1  -1   89.15    2.70
   9   1  -2    2.26    0.72
   9   1  -3   26.84    1.59
   9   1  -4    2.07    0.78
   9   1  -5   21.54    1.61
   9   1  -6   73.71    2.74
  -9  -1   7   11.09    1.39
   9   1  -7   13.17    1.39
  -9  -1   8    3.18    1.14
   9   1  -8    4.52    1.04
  -9  -1   9   18.65    1.84
   9   1  -9   20.22    1.66
  -9  -1  10    0.93    1.16
   9   1 -10    1.38    0.90
  -9  -1  11    9.65    1.70
   9   1 -11   10.64    1.45
  -9  -1  12    0.56    1.00
  -9  -1  12   -0.70    1.26
  -9  -1  13   -0.05    1.36
  -9  -1  13    2.28    1.12
  -9  -1  14    4.17    1.32
  -9  -1  14    1.07    1.51
   8   1  14    0.32    0.98
   8   1  13    3.54    1.18
   8   1  12   -0.27    0.84
   8   1  11   21.45    1.94
   8   1  10    0.02    0.73
   8   1   9    3.30    0.91
   8   1   8   10.54    1.32
   8   1   7   10.88    1.24
   8   1   6    0.09    0.51
   8   1   6    0.41    0.60
   8   1   5    0.09    0.53
   8   1   5    0.19    0.51
   8   1   4    1.97    0.63
   8   1   4    1.49    0.57
   8   1   3   34.02    1.50
   8   1   3   35.19    1.69
   8   1   2    6.03    0.76
   8   1   2    4.89    0.76
   8   1   1   -0.06    0.48
   8   1   1   -0.12    0.41
   8   1   0   -0.09    0.53
   8   1   0    0.09    0.40
   8   1  -1    4.69    0.70
   8   1  -1    3.06    0.71
   8   1  -2   19.04    1.35
   8   1  -3   14.33    1.23
   8   1  -4    6.34    0.93
   8   1  -5    4.91    0.92
  -8  -1   6    6.63    1.19
   8   1  -6    5.21    0.99
  -8  -1   7   18.02    1.67
   8   1  -7   18.72    1.59
  -8  -1   8    3.40    1.13
   8   1  -8    2.56    0.90
  -8  -1   9   -0.25    1.01
   8   1  -9   -0.69    0.70
  -8  -1  10    1.44    1.19
   8   1 -10   -0.26    0.81
  -8  -1  11   29.77    1.94
  -8  -1  11   26.09    2.42
   8   1 -11   26.60    1.93
  -8  -1  12    6.78    1.28
  -8  -1  12    1.31    1.27
  -8  -1  13   10.42    1.81
  -8  -1  13   15.04    1.64
  -8  -1  14    0.76    1.14
  -8  -1  14   -0.70    1.38
  -8  -1  15    5.39    1.77
   7   1  14    2.56    1.12
   7   1  13   -0.30    0.84
   7   1  12    0.22    0.85
   7   1  11   11.88    1.48
   7   1  10    5.03    1.09
   7   1   9   22.69    1.79
   7   1   8    0.49    0.63
   7   1   7   12.30    1.27
   7   1   6    8.69    1.04
   7   1   6   11.34    0.99
   7   1   5    3.53    0.61
   7   1   5    3.76    0.74
   7   1   4   10.69    0.92
   7   1   4    9.90    1.01
   7   1   3    2.38    0.55
   7   1   3    2.54    0.59
   7   1   2   14.27    1.05
   7   1   2   11.83    0.94
   7   1   1  138.46    3.32
   7   1   1  129.78    3.13
   7   1   0  123.51    3.02
   7   1   0  124.52    3.12
   7   1  -1  136.15    3.30
   7   1  -1  137.99    3.32
   7   1  -2    4.79    0.74
   7   1  -3    8.64    0.90
   7   1  -4   17.53    1.24
   7   1  -5   25.61    1.49
  -7  -1   6   -0.22    0.82
   7   1  -6    0.19    0.64
  -7  -1   7    9.51    1.35
   7   1  -7   11.10    1.20
  -7  -1   8   -0.12    1.04
   7   1  -8    0.09    0.69
  -7  -1   9   12.27    1.50
   7   1  -9   14.45    1.42
  -7  -1  10    3.28    1.26
   7   1 -10    3.96    1.00
  -7  -1  11    0.78    0.90
  -7  -1  11    0.79    1.19
  -7  -1  12   -1.37    1.07
  -7  -1  12    2.01    0.92
  -7  -1  13    3.10    1.40
  -7  -1  13    8.08    1.35
  -7  -1  14   -1.48    1.26
  -7  -1  15   12.30    1.94
   6   1  14    1.01    1.05
   6   1  13   -0.87    0.82
   6   1  12    2.50    1.02
   6   1  11    0.67    0.84
   6   1  10   -0.72    0.63
   6   1   9   36.54    2.10
   6   1   8    0.83    0.67
   6   1   7   87.26    2.95
   6   1   7   89.09    2.28
   6   1   6   -0.18    0.44
   6   1   6    0.11    0.52
   6   1   5   61.21    2.21
   6   1   5   59.23    1.73
   6   1   4   46.51    1.51
   6   1   4   47.57    1.82
   6   1   3    0.84    0.42
   6   1   3    0.56    0.39
   6   1   2   29.58    1.36
   6   1   2   31.19    1.24
   6   1   1    0.55    0.36
   6   1   1   -0.21    0.36
   6   1   0    4.15    0.55
   6   1   0    5.60    0.64
   6   1  -1   58.08    1.80
   6   1  -1   59.37    1.84
   6   1  -2    0.31    0.43
   6   1  -3   92.94    2.52
   6   1  -4   -0.12    0.44
  -6  -1   5   12.75    1.14
   6   1  -5   14.00    1.14
  -6  -1   6    3.02    0.92
   6   1  -6    3.78    0.77
  -6  -1   7    2.44    1.01
   6   1  -7    2.05    0.77
  -6  -1   8    5.01    1.21
   6   1  -8    7.20    1.05
  -6  -1   9   10.22    1.41
   6   1  -9   11.62    1.23
  -6  -1  10   -0.46    1.00
  -6  -1  10   -0.62    0.75
   6   1 -10   -0.59    0.71
  -6  -1  11   17.58    1.60
  -6  -1  11   12.66    1.60
  -6  -1  12    1.52    0.95
  -6  -1  12    1.86    1.20
  -6  -1  13    6.30    1.22
  -6  -1  13    1.82    1.24
  -6  -1  14    0.51    1.30
  -6  -1  15   -0.74    1.27
   5   1  15    0.61    1.09
   5   1  14    2.36    1.12
   5   1  13    1.00    0.90
   5   1  12    0.33    0.81
   5   1  11    0.40    0.75
   5   1  10    3.89    0.94
   5   1   9    5.32    0.99
   5   1   8    0.82    0.65
   5   1   7    0.55    0.59
   5   1   7   -0.64    0.49
   5   1   6   19.97    1.10
   5   1   6   21.09    1.45
   5   1   5   16.62    1.22
   5   1   5   14.64    0.93
   5   1   4    0.91    0.41
   5   1   4    0.66    0.39
   5   1   3   32.66    1.37
   5   1   3   31.82    1.15
   5   1   2   10.35    0.85
   5   1   2   11.52    0.78
   5   1   1   45.76    1.48
   5   1   1   45.22    1.40
   5   1   0   49.00    1.50
   5   1   0   46.22    1.48
   5   1  -1    1.40    0.37
   5   1  -1    1.01    0.41
   5   1  -2   58.43    1.78
   5   1  -3   82.95    2.23
   5   1  -4   17.39    1.06
  -5  -1   5  195.51    4.38
   5   1  -5  192.44    4.27
  -5  -1   6   17.21    1.64
   5   1  -6   17.63    1.22
  -5  -1   7   42.46    2.20
   5   1  -7   40.81    1.77
  -5  -1   8    1.42    1.00
   5   1  -8    1.01    0.72
  -5  -1   9    0.58    1.00
   5   1  -9    0.18    0.71
  -5  -1  10   12.51    1.25
  -5  -1  10    9.08    1.34
  -5  -1  11   -0.29    0.75
  -5  -1  11    1.37    1.05
  -5  -1  12   -0.29    1.06
  -5  -1  12    0.79    0.93
  -5  -1  13    9.98    1.35
  -5  -1  13    5.42    1.39
  -5  -1  14    4.45    1.37
  -5  -1  15    7.55    1.69
  -5  -1  16   -1.99    1.20
   4   1  15    3.41    1.24
   4   1  14    0.29    0.97
   4   1  13    0.38    0.85
   4   1  12    2.22    0.94
   4   1  11    2.26    0.91
   4   1  10    3.21    0.88
   4   1   9   17.51    1.58
   4   1   8    7.45    0.87
   4   1   8    6.61    0.97
   4   1   7   96.79    2.96
   4   1   7   94.84    2.43
   4   1   6    0.53    0.49
   4   1   6    0.66    0.50
   4   1   5   50.42    1.47
   4   1   5   46.93    1.78
   4   1   4    4.97    0.61
   4   1   4    5.17    0.53
   4   1   3  192.54    3.72
   4   1   3  191.82    4.02
   4   1   2    1.15    0.34
   4   1   2    0.82    0.33
   4   1   1   51.62    1.51
   4   1   1   51.84    1.42
   4   1   0    2.04    0.40
   4   1   0    2.12    0.37
   4   1  -1   91.63    2.17
   4   1  -1   95.05    2.19
   4   1  -2  146.10    3.14
   4   1  -3    0.32    0.37
  -4  -1   4   86.24    2.36
   4   1  -4   81.88    2.17
  -4  -1   5    0.26    0.58
   4   1  -5    0.06    0.45
  -4  -1   6    2.49    0.76
   4   1  -6    1.82    0.61
  -4  -1   7  140.99    3.77
   4   1  -7  140.88    3.45
  -4  -1   8    8.99    1.21
   4   1  -8    8.14    0.98
  -4  -1   9   43.73    2.42
  -4  -1   9   43.96    1.93
   4   1  -9   44.58    1.93
  -4  -1  10    2.15    0.98
  -4  -1  10    1.74    0.79
  -4  -1  11    6.59    1.27
  -4  -1  11    7.36    1.06
  -4  -1  12    9.58    1.22
  -4  -1  12    4.80    1.27
  -4  -1  13   -0.52    0.98
  -4  -1  14   -0.97    1.04
  -4  -1  15    5.01    1.50
  -4  -1  16    1.96    1.40
   3   1  15   13.29    1.81
   3   1  14    0.95    1.01
   3   1  13   19.90    1.93
   3   1  12    0.13    0.79
   3   1  11    1.50    0.82
   3   1  10    5.34    0.99
   3   1   9    8.48    1.09
   3   1   9    9.00    1.04
   3   1   8    4.70    0.86
   3   1   8    5.55    0.85
   3   1   7   77.16    2.53
   3   1   7   76.01    2.17
   3   1   6   18.34    1.15
   3   1   6   18.96    1.26
   3   1   5  151.26    3.12
   3   1   5  145.97    3.45
   3   1   4   64.24    1.86
   3   1   4   64.55    1.64
   3   1   3   75.03    1.96
   3   1   3   74.31    1.72
   3   1   2  494.83    8.62
   3   1   2  497.73    8.77
   3   1   1  354.79    6.31
   3   1   1  356.42    6.39
   3   1   0  119.17    2.46
   3   1   0  120.70    2.50
   3   1  -1    1.10    0.37
   3   1  -2   86.82    2.04
  -3  -1   3    0.09    0.42
   3   1  -3    0.33    0.34
  -3  -1   4    0.53    0.48
   3   1  -4    0.43    0.37
  -3  -1   5   78.69    2.34
   3   1  -5   78.80    2.07
  -3  -1   6   19.06    1.48
   3   1  -6   16.88    1.06
  -3  -1   7    0.65    0.73
   3   1  -7    2.71    0.67
  -3  -1   8    1.59    0.73
  -3  -1   8    0.95    0.84
   3   1  -8    1.62    0.66
  -3  -1   9   39.51    2.26
  -3  -1   9   36.56    1.73
  -3  -1  10   -0.95    0.69
  -3  -1  10    1.46    0.90
  -3  -1  11    0.00    0.86
  -3  -1  11   -0.78    0.72
  -3  -1  12   -1.27    0.86
  -3  -1  12   -0.27    0.81
  -3  -1  13   -0.22    0.97
  -3  -1  14    1.66    1.16
  -3  -1  15   -0.82    1.09
  -3  -1  16   -0.77    1.17
   2   1  16   -0.94    0.99
   2   1  15    1.74    1.11
   2   1  14   -0.83    0.85
   2   1  13    3.65    1.08
   2   1  12   -0.65    0.74
   2   1  11    4.71    0.98
   2   1  10    3.53    0.86
   2   1   9    1.55    0.76
   2   1   9    1.29    0.85
   2   1   8   58.61    2.28
   2   1   8   59.85    2.07
   2   1   7   53.34    2.02
   2   1   7   55.29    1.81
   2   1   6    5.19    0.70
   2   1   6    5.57    0.67
   2   1   5   48.05    1.45
   2   1   5   45.70    1.62
   2   1   4   68.60    1.69
   2   1   4   67.68    1.87
   2   1   3  756.69   13.05
   2   1   3  760.06   12.94
   2   1   2  330.15    5.83
   2   1   2  331.44    5.93
   2   1   1   28.33    0.85
   2   1   1   28.02    0.80
   2   1   0  223.84    4.03
   2   1   0  224.69    4.03
   2   1  -1   20.98    0.72
   2   1  -2   19.12    0.79
  -2  -1   3    1.42    0.48
   2   1  -3    0.93    0.34
  -2  -1   4   18.44    1.15
   2   1  -4   16.11    0.82
  -2  -1   5   35.11    1.49
   2   1  -5   34.93    1.22
  -2  -1   6   18.69    1.39
   2   1  -6   18.03    1.02
  -2  -1   7  153.31    3.38
  -2  -1   7  159.21    3.87
  -2  -1   8    8.75    1.10
  -2  -1   8   10.15    0.92
  -2  -1   9   31.63    2.04
  -2  -1   9   32.06    1.60
  -2  -1  10    0.58    0.80
  -2  -1  10    0.44    0.72
  -2  -1  11    2.17    0.95
  -2  -1  11    1.71    0.81
  -2  -1  12    5.14    1.17
  -2  -1  13    5.58    1.25
  -2  -1  14   -1.99    0.91
  -2  -1  15    0.70    1.12
  -2  -1  16    0.62    1.26
   1   1  16   -0.90    0.99
   1   1  15   12.85    1.73
   1   1  14    2.95    1.12
   1   1  13   11.32    1.46
   1   1  12    1.52    0.92
   1   1  11   -0.21    0.72
   1   1  10    7.25    1.09
   1   1  10    8.04    1.06
   1   1   9    0.45    0.68
   1   1   9   -0.69    0.75
   1   1   8    0.28    0.70
   1   1   8    0.14    0.63
   1   1   7    0.25    0.59
   1   1   7    0.33    0.53
   1   1   6    5.77    0.70
   1   1   6    7.21    0.71
   1   1   5    8.23    0.84
   1   1   5    5.43    0.61
   1   1   4   11.91    0.80
   1   1   4   13.46    0.87
   1   1   3   64.55    1.57
   1   1   3   67.48    1.66
   1   1   2   41.68    1.08
   1   1   2   42.47    1.11
   1   1   1   33.61    0.83
   1   1   1   34.53    0.84
   1   1   0   21.13    0.56
   1   1   0   21.71    0.56
  -1  -1   1  909.67   15.22
   1   1  -1 1000.00   16.69
  -1  -1   2    0.62    0.28
  -1  -1   2    0.82    0.12
   1   1  -2    0.72    0.22
  -1  -1   3    0.75    0.46
  -1  -1   3    0.15    0.17
   1   1  -3   -0.15    0.29
  -1  -1   4   17.03    1.08
  -1  -1   4   17.18    0.60
   1   1  -4   18.18    0.77
  -1  -1   5    1.47    0.49
   1   1  -5    1.64    0.38
  -1  -1   6  142.99    3.43
  -1  -1   6  141.43    2.96
  -1  -1   7  116.48    3.16
  -1  -1   7  122.16    2.73
  -1  -1   8   -0.30    0.56
  -1  -1   8    0.41    0.70
  -1  -1   9   31.06    1.96
  -1  -1   9   30.27    1.52
  -1  -1  10    0.93    0.72
  -1  -1  10   -0.19    0.75
  -1  -1  11   11.60    1.35
  -1  -1  12    1.96    0.95
  -1  -1  13    1.30    0.95
  -1  -1  14    5.23    1.29
  -1  -1  15    6.12    1.44
  -1  -1  16   -2.38    0.99
   0   1  16   -0.88    1.01
   0   1  15   -1.71    0.94
   0   1  14    0.28    0.97
   0   1  13   26.62    2.10
   0   1  12    1.44    0.89
   0   1  11   17.43    1.64
   0   1  11   16.27    1.38
   0   1  10   -0.08    0.79
   0   1  10   -0.08    0.68
   0   1   9   -0.30    0.76
   0   1   9   -0.32    0.69
   0   1   8    1.56    0.68
   0   1   8    0.10    0.71
   0   1   7   60.22    2.09
   0   1   7   62.57    1.93
   0   1   6   42.70    1.64
   0   1   6   44.21    1.47
   0   1   5    3.22    0.52
   0   1   5    2.29    0.48
   0   1   4   42.74    1.37
   0   1   4   40.32    1.23
   0   1   3  124.90    2.55
   0   1   3  131.43    2.66
   0   1   2  180.08    3.22
   0   1   2  172.70    3.19
   0   1   1   83.87    1.51
   0   1   1   82.63    1.57
   0  -1   0   -1.11    0.03
   0   1   0   -1.13    0.03
   0  -1   1   81.81    1.43
   0  -1   1   85.41    1.60
   0   1  -1   86.65    1.50
   0  -1   2  180.10    2.99
   0  -1   2  182.64    3.35
   0   1  -2  177.66    3.15
   0  -1   3  129.93    2.74
   0  -1   3  128.35    2.31
   0   1  -3  126.29    2.41
   0  -1   4   40.86    1.41
   0  -1   4   41.45    1.05
   0  -1   4   37.86    1.03
   0  -1   5    2.45    0.39
   0  -1   5    2.62    0.52
   0  -1   6   41.57    1.26
   0  -1   6   43.71    1.68
   0  -1   7   60.24    1.68
   0  -1   7   63.41    2.18
   0  -1   8    0.61    0.59
   0  -1   8    0.36    0.64
   0  -1   9    0.04    0.72
   0  -1   9    0.33    0.67
   0  -1  10    0.11    0.73
   0  -1  10   -0.51    0.69
   0  -1  11   16.81    1.67
   0  -1  12   -1.08    0.76
   0  -1  13   25.04    2.06
   0  -1  14    0.32    0.98
   0  -1  15   -0.38    1.01
   0  -1  16   -0.23    1.06
  -1   1  16   -0.72    1.04
  -1   1  15    5.87    1.45
  -1   1  14    4.15    1.24
  -1   1  13    2.17    1.04
  -1   1  12    1.54    0.92
  -1   1  11   11.32    1.29
  -1   1  11   15.81    1.56
  -1   1  10   -0.77    0.77
  -1   1  10    0.60    0.73
  -1   1   9   31.99    1.69
  -1   1   9   32.51    1.92
  -1   1   8    0.72    0.67
  -1   1   8    0.59    0.66
  -1   1   7  122.79    2.88
  -1   1   7  122.03    3.17
  -1   1   6  141.79    3.33
  -1   1   6  141.18    3.06
  -1   1   5    0.28    0.42
  -1   1   5    1.46    0.44
  -1   1   4   19.12    0.91
  -1   1   4   20.20    1.05
  -1   1   3   -0.76    0.38
  -1   1   3    0.74    0.41
  -1   1   2    1.27    0.28
  -1   1   2    0.78    0.26
   1  -1  -1  897.58   14.71
   1  -1  -1  943.74   16.30
   1  -1   0   21.93    0.50
   1  -1   0   20.78    0.49
   1  -1   0   21.37    0.52
   1  -1   1   33.53    0.82
   1  -1   1   34.77    0.79
   1  -1   2   40.24    0.97
   1  -1   2   43.39    1.14
   1  -1   3   65.39    1.33
   1  -1   3   64.59    1.46
   1  -1   3   67.85    1.73
   1  -1   4   12.56    0.90
   1  -1   4   12.28    0.67
   1  -1   4   10.87    0.62
   1  -1   5    6.43    0.49
   1  -1   5    5.30    0.63
   1  -1   6    5.73    0.71
   1  -1   6    6.31    0.57
   1  -1   7   -0.38    0.46
   1  -1   7    0.69    0.55
   1  -1   8   -0.20    0.58
   1  -1   8    0.73    0.65
   1  -1   9   -0.04    0.68
   1  -1   9    0.13    0.68
   1  -1  10    8.90    1.13
   1  -1  11   -0.33    0.69
   1  -1  12    1.64    0.94
   1  -1  13    8.92    1.36
   1  -1  14    3.01    1.10
   1  -1  15   13.00    1.70
   1  -1  16   -0.99    1.04
  -2   1  16    0.05    1.18
  -2   1  15    0.46    1.11
  -2   1  14   -1.30    0.90
  -2   1  13    5.01    1.21
  -2   1  12    6.65    1.18
  -2   1  12    7.96    1.26
  -2   1  11    1.38    0.87
  -2   1  11    1.43    0.87
  -2   1  10    1.31    0.81
  -2   1  10    0.33    0.79
  -2   1   9   33.09    1.98
  -2   1   9   32.47    1.76
  -2   1   8    8.31    1.01
  -2   1   8    9.15    0.98
  -2   1   7  159.42    3.82
  -2   1   7  156.85    3.53
  -2   1   6   16.49    1.28
  -2   1   6   18.31    1.07
  -2   1   5   35.56    1.45
  -2   1   5   36.01    1.25
   2  -1  -4   16.59    0.88
  -2   1   4   16.55    0.88
  -2   1   4   16.45    1.05
   2  -1  -3    1.12    0.38
  -2   1   3    1.33    0.45
   2  -1  -2   21.16    0.49
   2  -1  -2   19.45    0.83
  -2   1   2   17.86    0.91
   2  -1  -1   19.65    0.70
   2  -1  -1   20.34    0.51
   2  -1   0  216.26    3.56
   2  -1   0  218.35    3.82
   2  -1   0  212.79    3.83
   2  -1   1   29.21    0.80
   2  -1   1   28.66    0.86
   2  -1   1   29.35    0.71
   2  -1   2  337.70    5.52
   2  -1   2  318.57    5.43
   2  -1   2  317.98    5.81
   2  -1   3  742.10   12.91
   2  -1   3  758.26   12.04
   2  -1   4   64.02    1.60
   2  -1   4   65.68    1.85
   2  -1   4   65.79    1.39
   2  -1   5   46.81    1.22
   2  -1   5   48.16    1.66
   2  -1   6    3.62    0.63
   2  -1   6    5.06    0.53
   2  -1   7   51.91    1.59
   2  -1   7   56.59    2.09
   2  -1   8   60.03    2.31
   2  -1   8   58.85    1.84
   2  -1   9    0.37    0.68
   2  -1  10    2.12    0.81
   2  -1  11    3.99    0.96
   2  -1  12   -0.12    0.79
   2  -1  13    4.59    1.12
   2  -1  14   -1.76    0.79
   2  -1  15    0.19    1.09
   2  -1  16   -0.41    1.04
  -3   1  16   -0.39    1.21
  -3   1  15   -1.48    1.05
  -3   1  14    0.79    1.11
  -3   1  13   -0.89    0.90
  -3   1  12   -1.01    0.90
  -3   1  12   -0.34    0.86
  -3   1  11    0.46    0.83
  -3   1  11    0.70    0.85
  -3   1  10    0.02    0.83
  -3   1  10   -0.47    0.79
  -3   1   9   35.86    1.80
  -3   1   9   39.64    2.22
  -3   1   8    1.21    0.78
  -3   1   8    2.99    0.89
  -3   1   7    0.63    0.68
  -3   1   7    0.72    0.62
   3  -1  -6   15.72    1.12
  -3   1   6   16.01    1.13
  -3   1   6   16.95    1.36
   3  -1  -5   80.42    2.15
  -3   1   5   76.22    2.21
   3  -1  -4    0.36    0.39
  -3   1   4    1.07    0.47
   3  -1  -3    0.14    0.36
  -3   1   3   -0.43    0.37
   3  -1  -2   87.76    2.03
   3  -1  -2   86.30    1.54
   3  -1  -1    0.51    0.24
   3  -1  -1    0.14    0.33
   3  -1  -1    0.40    0.19
   3  -1   0  120.51    2.43
   3  -1   0  120.03    2.22
   3  -1   0  118.78    2.40
   3  -1   1  362.16    6.25
   3  -1   1  354.79    5.94
   3  -1   1  354.93    6.37
   3  -1   2  500.09    8.91
   3  -1   2  513.92    8.65
   3  -1   3   72.27    1.91
   3  -1   3   73.49    1.48
   3  -1   3   73.61    1.77
   3  -1   4   58.59    1.78
   3  -1   4   61.24    1.65
   3  -1   4   58.45    1.27
   3  -1   5  144.08    2.72
   3  -1   5  143.13    3.38
   3  -1   6   17.48    0.84
   3  -1   6   17.90    1.25
   3  -1   7   73.34    2.44
   3  -1   7   74.82    1.86
   3  -1   8    4.67    0.86
   3  -1   8    5.19    0.69
   3  -1   9    9.79    1.14
   3  -1  10    4.41    0.93
   3  -1  11    0.33    0.71
   3  -1  12    0.05    0.76
   3  -1  13   21.43    1.97
   3  -1  14    1.06    0.98
   3  -1  15   13.14    1.79
  -4   1  16   -1.98    1.18
  -4   1  15    5.55    1.51
  -4   1  14   -1.90    0.96
  -4   1  13   -0.85    0.98
  -4   1  13   -1.63    0.90
  -4   1  12    7.65    1.26
  -4   1  12    6.31    1.26
  -4   1  11    6.21    1.09
  -4   1  11    5.14    1.17
  -4   1  10    1.92    0.97
  -4   1  10    2.30    0.87
  -4   1   9   42.77    2.01
  -4   1   9   47.62    2.38
  -4   1   8    8.04    1.14
  -4   1   8    7.14    0.99
   4  -1  -7  137.79    3.50
  -4   1   7  140.35    3.70
  -4   1   7  147.51    3.47
   4  -1  -6    2.49    0.66
  -4   1   6    2.39    0.72
   4  -1  -5    0.30    0.48
  -4   1   5    1.14    0.58
   4  -1  -4   84.88    2.25
  -4   1   4   84.34    2.23
   4  -1  -3    0.31    0.38
   4  -1  -2  138.63    2.42
   4  -1  -2  139.79    3.00
   4  -1  -1   90.76    2.11
   4  -1  -1   89.76    1.77
   4  -1  -1   92.21    2.08
   4  -1   0    1.67    0.30
   4  -1   0    2.28    0.39
   4  -1   0    2.08    0.34
   4  -1   1   50.46    1.34
   4  -1   1   49.06    1.41
   4  -1   1   51.26    1.33
   4  -1   2    0.87    0.29
   4  -1   2    1.16    0.33
   4  -1   2    1.09    0.32
   4  -1   3  190.86    4.02
   4  -1   3  198.76    3.77
   4  -1   3  193.93    3.59
   4  -1   4    4.83    0.56
   4  -1   4    5.35    0.50
   4  -1   4    4.89    0.60
   4  -1   5   45.14    1.14
   4  -1   5   46.27    1.75
   4  -1   6    0.28    0.32
   4  -1   6    0.85    0.50
   4  -1   7   93.86    2.91
   4  -1   8    7.10    1.01
   4  -1   9   17.97    1.57
   4  -1  10    2.92    0.86
   4  -1  11    3.00    0.94
   4  -1  12    1.87    0.93
   4  -1  13    0.65    0.92
   4  -1  14   -0.43    0.90
   4  -1  15    2.26    1.13
  -5   1  16   -2.17    1.15
  -5   1  15    7.00    1.60
  -5   1  14    2.91    1.32
  -5   1  13    4.58    1.27
  -5   1  13    8.72    1.39
  -5   1  12   -0.87    0.98
  -5   1  12   -0.15    0.94
  -5   1  11   -0.11    0.96
  -5   1  11    1.02    0.88
  -5   1  10   10.99    1.36
  -5   1  10   12.01    1.29
  -5   1   9    0.03    0.95
  -5   1   9   -0.09    0.85
   5  -1  -8    1.15    0.76
  -5   1   8    1.37    0.97
  -5   1   8    1.02    0.81
   5  -1  -7   41.49    1.88
  -5   1   7   44.35    2.19
   5  -1  -6   18.89    1.28
  -5   1   6   18.10    1.56
   5  -1  -5  184.63    4.16
  -5   1   5  186.75    4.16
   5  -1  -4   17.80    1.10
   5  -1  -3   83.61    2.24
   5  -1  -3   82.12    1.55
   5  -1  -2   57.41    1.69
   5  -1  -2   54.52    1.24
   5  -1  -1    1.53    0.36
   5  -1  -1    1.32    0.27
   5  -1  -1    1.82    0.43
   5  -1   0   46.75    1.41
   5  -1   0   45.83    1.45
   5  -1   0   46.71    1.27
   5  -1   1   43.35    1.33
   5  -1   1   47.42    1.48
   5  -1   1   44.45    1.32
   5  -1   2   10.64    0.70
   5  -1   2   10.30    0.76
   5  -1   2   11.31    0.85
   5  -1   3   32.02    1.05
   5  -1   3   30.41    1.26
   5  -1   3   30.91    1.30
   5  -1   4    0.29    0.30
   5  -1   4    0.87    0.43
   5  -1   5   14.39    1.19
   5  -1   5   14.84    0.73
   5  -1   6   21.47    1.46
   5  -1   6   19.47    0.83
   5  -1   7   -0.06    0.56
   5  -1   8    0.24    0.65
   5  -1   9    5.48    0.96
   5  -1  10    3.17    0.92
   5  -1  11    1.29    0.83
   5  -1  12   -0.14    0.80
   5  -1  13    0.96    0.91
   5  -1  14    1.98    1.06
   5  -1  15    1.76    1.11
  -6   1  15    0.80    1.31
  -6   1  14    1.28    1.20
  -6   1  14    0.49    1.23
  -6   1  13    3.98    1.33
  -6   1  13    6.36    1.27
  -6   1  12    1.13    1.15
  -6   1  12    2.69    1.06
  -6   1  11   14.18    1.61
  -6   1  11   19.48    1.75
  -6   1  10    0.80    0.98
  -6   1  10   -0.37    0.77
  -6   1   9   10.63    1.41
  -6   1   9   12.80    1.32
   6  -1  -8    7.55    1.10
  -6   1   8    4.55    1.16
   6  -1  -7    1.67    0.78
  -6   1   7    1.13    0.91
   6  -1  -6    2.87    0.77
  -6   1   6    2.19    0.87
   6  -1  -5   13.30    1.15
  -6   1   5   11.43    1.04
   6  -1  -4    0.26    0.50
   6  -1  -3   91.64    2.50
   6  -1  -2    0.62    0.45
   6  -1  -2    0.40    0.24
   6  -1  -1   56.31    1.73
   6  -1  -1   56.90    1.45
   6  -1  -1   57.04    1.74
   6  -1   0    5.23    0.62
   6  -1   0    3.85    0.52
   6  -1   0    5.36    0.50
   6  -1   1   -0.26    0.31
   6  -1   1    0.11    0.32
   6  -1   1   -0.50    0.34
   6  -1   2   30.50    1.23
   6  -1   2   31.76    1.17
   6  -1   2   30.10    1.34
   6  -1   3   -0.09    0.35
   6  -1   3   -0.04    0.33
   6  -1   4   45.77    1.37
   6  -1   4   48.84    1.80
   6  -1   5   59.01    2.13
   6  -1   5   57.94    1.53
   6  -1   6    0.07    0.53
   6  -1   6   -0.18    0.35
   6  -1   7   84.75    2.92
   6  -1   8    1.00    0.66
   6  -1   9   35.06    2.07
   6  -1  10    1.03    0.76
   6  -1  11   -0.78    0.70
   6  -1  12    2.13    0.98
   6  -1  13    1.44    0.96
   6  -1  14   -0.70    0.91
  -7   1  15   12.08    1.88
  -7   1  14    0.11    1.12
  -7   1  13    7.48    1.37
  -7   1  13    3.64    1.39
  -7   1  12    1.63    1.03
  -7   1  12   -0.56    1.08
  -7   1  11   -0.75    1.05
  -7   1  11    1.32    0.93
  -7   1  10    5.61    1.12
  -7   1  10    4.24    1.26
   7  -1  -9   15.57    1.48
  -7   1   9   12.34    1.48
  -7   1   9   15.32    1.50
   7  -1  -8   -0.13    0.73
  -7   1   8   -0.38    1.02
   7  -1  -7   11.10    1.25
  -7   1   7    9.88    1.29
   7  -1  -6    0.13    0.67
  -7   1   6    0.13    0.79
   7  -1  -5   25.63    1.52
   7  -1  -4   15.84    1.23
   7  -1  -3    9.76    0.97
   7  -1  -2    5.52    0.76
   7  -1  -1  136.33    3.24
   7  -1  -1  138.69    3.28
   7  -1   0  127.63    2.99
   7  -1   0  122.87    3.02
   7  -1   0  118.09    2.66
   7  -1   1  132.31    3.22
   7  -1   1  131.72    3.06
   7  -1   2   14.11    1.04
   7  -1   2   13.22    0.97
   7  -1   3    3.29    0.62
   7  -1   3    2.25    0.52
   7  -1   4   11.55    1.16
   7  -1   4    9.34    0.84
   7  -1   5    3.52    0.72
   7  -1   5    3.63    0.53
   7  -1   6    8.01    1.01
   7  -1   6   11.06    0.84
   7  -1   7   11.82    1.26
   7  -1   8   -0.36    0.56
   7  -1   9   22.37    1.79
   7  -1  10    4.12    1.04
   7  -1  11   10.80    1.47
   7  -1  12    1.00    0.96
   7  -1  13   -0.70    0.89
   7  -1  14    2.52    1.16
  -8   1  15    7.11    1.71
  -8   1  14   -2.26    1.25
  -8   1  14    3.10    1.25
  -8   1  13   13.96    1.67
  -8   1  13   13.46    1.86
  -8   1  12    5.34    1.22
  -8   1  12    1.07    1.21
  -8   1  11   23.16    2.35
  -8   1  11   28.06    1.93
   8  -1 -10   -0.16    0.82
  -8   1  10   -0.95    0.85
  -8   1  10   -1.09    1.09
   8  -1  -9    0.51    0.81
  -8   1   9    0.99    1.03
   8  -1  -8    2.19    0.90
  -8   1   8    3.66    1.14
   8  -1  -7   19.03    1.60
  -8   1   7   17.63    1.61
   8  -1  -6    7.54    1.11
  -8   1   6    6.45    1.12
   8  -1  -5    5.11    0.94
   8  -1  -4    5.68    0.94
   8  -1  -3   12.75    1.22
   8  -1  -2   18.86    1.29
   8  -1  -1    4.58    0.76
   8  -1  -1    3.96    0.63
   8  -1   0    0.07    0.42
   8  -1   0    0.73    0.54
   8  -1   1   -0.31    0.37
   8  -1   1   -0.08    0.47
   8  -1   2    5.63    0.75
   8  -1   2    6.64    0.76
   8  -1   3   33.32    1.47
   8  -1   3   37.58    1.70
   8  -1   4    1.74    0.54
   8  -1   4    2.18    0.65
   8  -1   5   -0.38    0.44
   8  -1   5    0.01    0.54
   8  -1   6    0.86    0.59
   8  -1   7    8.55    1.13
   8  -1   8   12.38    1.38
   8  -1   9    1.22    0.77
   8  -1  10    1.25    0.82
   8  -1  11   23.75    2.03
   8  -1  12   -0.10    0.84
   8  -1  13    4.26    1.21
   8  -1  14   -0.13    0.94
  -9   1  14    3.29    1.30
  -9   1  14   -0.05    1.41
  -9   1  13    4.55    1.34
  -9   1  13    0.30    1.34
  -9   1  12   -0.88    1.15
  -9   1  12   -0.01    1.01
  -9   1  11   10.85    1.49
  -9   1  11    8.75    1.58
   9  -1 -10    1.68    1.00
  -9   1  10    0.35    1.15
  -9   1  10    0.97    0.99
   9  -1  -9   18.52    1.69
  -9   1   9   19.56    1.85
   9  -1  -8    3.32    0.98
  -9   1   8    4.35    1.15
   9  -1  -7   12.03    1.37
  -9   1   7   12.27    1.40
   9  -1  -6   71.52    2.74
   9  -1  -5   24.62    1.72
   9  -1  -4    2.40    0.83
   9  -1  -3   25.64    1.60
   9  -1  -2    4.04    0.82
   9  -1  -1   86.98    2.65
   9  -1  -1   85.59    2.63
   9  -1   0    0.07    0.46
   9  -1   0   -0.28    0.59
   9  -1   1   49.87    2.01
   9  -1   1   51.98    1.89
   9  -1   2    1.52    0.58
   9  -1   2    2.56    0.67
   9  -1   3   13.27    1.27
   9  -1   3   12.69    1.07
   9  -1   4    9.76    0.99
   9  -1   4    8.18    1.01
   9  -1   5    0.11    0.55
   9  -1   5    0.99    0.54
   9  -1   6   11.03    1.24
   9  -1   7    0.76    0.70
   9  -1   8    0.21    0.70
   9  -1   9    3.14    0.96
   9  -1  10    1.81    0.90
   9  -1  11    3.07    1.09
   9  -1  12   -0.03    0.94
   9  -1  13    1.79    1.09
 -10   1  14   -1.39    1.40
 -10   1  14    0.41    1.23
 -10   1  13    2.52    1.25
 -10   1  13    1.24    1.46
 -10   1  12    5.21    1.28
 -10   1  12    1.62    1.45
 -10   1  11    4.41    1.23
 -10   1  11    1.85    1.34
  10  -1 -10   -0.36    0.88
 -10   1  10    0.10    1.16
 -10   1  10    0.63    1.00
  10  -1  -9   17.01    1.75
 -10   1   9   14.87    1.73
  10  -1  -8   13.91    1.57
 -10   1   8   11.96    1.53
  10  -1  -7   27.91    1.90
 -10   1   7   27.13    2.10
  10  -1  -6    7.23    1.16
  10  -1  -5    0.17    0.76
  10  -1  -4    8.47    1.18
  10  -1  -3    1.52    0.79
  10  -1  -2   14.10    1.41
  10  -1  -1    2.40    0.68
  10  -1  -1    3.11    0.82
  10  -1   0    0.39    0.66
  10  -1   0    0.67    0.53
  10  -1   1   22.72    1.52
  10  -1   1   24.21    1.45
  10  -1   2   13.18    1.31
  10  -1   2   13.61    1.22
  10  -1   3   76.15    2.69
  10  -1   3   77.24    2.38
  10  -1   4    2.00    0.65
  10  -1   4    2.63    0.75
  10  -1   5   15.42    1.46
  10  -1   6    1.87    0.72
  10  -1   7    1.06    0.67
  10  -1   8    1.41    0.81
  10  -1   9    2.52    0.99
  10  -1  10    2.18    0.98
  10  -1  11    8.11    1.44
  10  -1  12    0.22    0.94
 -11   1  13   10.06    1.88
 -11   1  13   17.61    1.94
 -11   1  12    0.67    1.13
 -11   1  12   -0.34    1.39
 -11   1  11    0.30    1.32
 -11   1  11    1.96    1.13
  11  -1 -10    0.47    1.00
 -11   1  10    2.06    1.08
 -11   1  10   -0.04    1.22
  11  -1  -9    6.28    1.26
 -11   1   9    7.05    1.44
  11  -1  -8   -0.32    0.87
 -11   1   8    0.69    1.09
  11  -1  -7   -0.71    0.76
 -11   1   7    0.42    1.00
  11  -1  -6    6.69    1.20
  11  -1  -5   42.99    2.23
  11  -1  -4    9.53    1.26
  11  -1  -3    0.43    0.76
  11  -1  -2   14.30    1.42
  11  -1  -1    0.12    0.72
  11  -1  -1   -0.06    0.53
  11  -1   0    8.25    1.04
  11  -1   0   10.99    1.19
  11  -1   1    0.78    0.67
  11  -1   1    0.71    0.57
  11  -1   2   16.54    1.43
  11  -1   2   13.52    1.24
  11  -1   3   10.04    1.04
  11  -1   3    9.49    1.13
  11  -1   4    4.52    0.89
  11  -1   4    4.17    0.78
  11  -1   5   23.69    1.73
  11  -1   6   -0.09    0.64
  11  -1   7    1.33    0.79
  11  -1   8    0.46    0.76
  11  -1   9    0.61    0.83
  11  -1  10    7.88    1.42
  11  -1  11   -0.29    0.81
  11  -1  12    0.31    0.92
 -12   1  13   -1.53    1.47
 -12   1  13    2.16    1.27
 -12   1  12    0.06    1.47
 -12   1  12    0.79    1.18
  12  -1 -11   -1.99    0.94
 -12   1  11   -0.28    1.34
 -12   1  11    0.74    1.16
  12  -1 -10    2.38    1.17
 -12   1  10    3.13    1.42
  12  -1  -9   11.50    1.61
 -12   1   9    9.75    1.65
  12  -1  -8    2.87    1.11
 -12   1   8    1.71    1.15
  12  -1  -7   33.96    2.19
 -12   1   7   36.62    2.39
  12  -1  -6    3.82    1.12
  12  -1  -5   15.34    1.62
  12  -1  -4   16.57    1.65
  12  -1  -3    1.11    0.82
  12  -1  -2   11.74    1.36
  12  -1  -1    5.43    0.94
  12  -1  -1    6.64    1.10
  12  -1   0    1.46    0.68
  12  -1   0    0.65    0.70
  12  -1   1   23.67    1.56
  12  -1   1   27.09    1.74
  12  -1   2    4.79    0.91
  12  -1   2    5.72    0.95
  12  -1   3    5.90    0.95
  12  -1   3    5.60    0.98
  12  -1   4   -0.44    0.57
  12  -1   5    0.12    0.61
  12  -1   6   -0.39    0.60
  12  -1   7   18.60    1.78
  12  -1   8    1.27    0.88
  12  -1   9    4.05    1.15
  12  -1  10   -0.59    0.77
  12  -1  11    1.25    1.02
 -13   1  12   -2.24    1.39
 -13   1  12    0.68    1.21
  13  -1 -11   -1.70    1.01
 -13   1  11    0.92    1.20
 -13   1  11   -2.39    1.34
  13  -1 -10    4.65    1.35
 -13   1  10    2.82    1.47
  13  -1  -9    0.97    1.03
 -13   1   9    0.23    1.24
  13  -1  -8    0.61    0.96
 -13   1   8    0.21    1.07
  13  -1  -7    3.60    1.17
 -13   1   7    5.69    1.32
  13  -1  -6    2.18    1.03
  13  -1  -5   58.94    2.75
  13  -1  -4   -0.21    0.83
  13  -1  -3    0.53    0.88
  13  -1  -2    0.07    0.82
  13  -1  -1    1.20    0.72
  13  -1  -1    0.54    0.78
  13  -1   0   11.33    1.33
  13  -1   0   12.63    1.38
  13  -1   1    4.85    1.00
  13  -1   1    3.06    0.84
  13  -1   2    0.25    0.73
  13  -1   2   -0.34    0.59
  13  -1   3    0.41    0.67
  13  -1   3    1.41    0.75
  13  -1   4    4.39    0.96
  13  -1   5   18.11    1.71
  13  -1   6    1.32    0.86
  13  -1   7    0.65    0.82
  13  -1   8    1.81    0.97
  13  -1   9   -1.18    0.73
  13  -1  10    0.92    0.95
  14  -1 -11   -1.17    1.10
 -14   1  11    2.53    1.29
 -14   1  11   -1.30    1.40
  14  -1 -10    0.39    1.13
 -14   1  10    0.00    1.32
  14  -1  -9   -0.09    1.04
 -14   1   9   -0.56    1.26
  14  -1  -8    0.35    1.02
 -14   1   8   -0.29    1.14
  14  -1  -7    0.59    1.01
  14  -1  -6    0.74    1.02
  14  -1  -5    2.07    1.05
  14  -1  -4    3.77    1.13
  14  -1  -3    8.93    1.41
  14  -1  -2    0.25    0.84
  14  -1  -1   46.70    2.34
  14  -1   0    1.13    0.79
  14  -1   0    0.46    0.82
  14  -1   1    4.70    1.03
  14  -1   1    4.25    1.04
  14  -1   2    4.70    1.01
  14  -1   2    2.95    0.90
  14  -1   3    1.33    0.76
  14  -1   4   14.59    1.58
  14  -1   5    0.29    0.72
  14  -1   6    2.36    0.98
  14  -1   7   28.59    2.23
  14  -1   8   -0.02    0.80
  14  -1   9    2.05    1.03
  15  -1 -10    0.09    1.14
 -15   1  10    1.52    1.21
 -15   1  10   -2.31    1.33
  15  -1  -9    2.04    1.24
 -15   1   9    2.10    1.44
  15  -1  -8   -0.37    0.98
 -15   1   8    1.41    1.27
  15  -1  -7    0.94    1.11
  15  -1  -6    3.92    1.27
  15  -1  -5    6.11    1.34
  15  -1  -4    6.78    1.37
  15  -1  -3    2.61    1.08
  15  -1  -2    1.86    1.03
  15  -1  -1    1.30    0.90
  15  -1   0    9.79    1.34
  15  -1   0    9.22    1.34
  15  -1   1    4.61    1.11
  15  -1   1    3.28    0.97
  15  -1   2    1.89    0.87
  15  -1   3    3.57    1.05
  15  -1   4    2.33    0.92
  15  -1   5    2.72    0.99
  15  -1   6    1.26    0.88
  15  -1   7    8.27    1.40
  15  -1   8   -0.09    0.86
  16  -1  -9    2.37    1.37
 -16   1   9    0.85    1.43
  16  -1  -8    5.33    1.44
 -16   1   8    5.98    1.57
  16  -1  -7    3.74    1.38
  16  -1  -6    1.32    1.11
  16  -1  -5    3.30    1.28
  16  -1  -4    1.21    1.05
  16  -1  -3    8.78    1.50
  16  -1  -2   -0.02    0.94
  16  -1  -1   12.00    1.59
  16  -1   0    1.68    1.01
  16  -1   0    3.42    1.06
  16  -1   1   15.36    1.68
  16  -1   1   18.11    1.76
  16  -1   2    5.86    1.19
  16  -1   3    3.36    1.06
  16  -1   4    1.31    0.90
  16  -1   5    1.52    0.89
  16  -1   6    0.88    0.92
  17  -1  -7    1.32    1.21
  17  -1  -6    2.71    1.33
  17  -1  -5    4.12    1.32
  17  -1  -4   -0.39    1.03
  17  -1  -3    0.90    1.08
  17  -1  -2    5.62    1.31
  17  -1  -1    3.77    1.19
  17  -1   0    1.14    1.06
  17  -1   1    1.03    0.90
  17  -1   2   -0.18    0.83
  17  -1   3   10.46    1.57
  17  -1   4    0.12    0.84
  18  -1  -4    0.05    1.06
  18  -1  -3    1.66    1.16
  18  -1  -2    7.53    1.50
  18  -1  -1    3.52    1.22
  18   2   0    1.08    1.00
  18   2  -1    3.18    1.21
  18   2  -2    1.10    1.07
  18   2  -3    2.97    1.22
  18   2  -4    0.59    1.07
  17   2   4    3.42    1.15
  17   2   3    0.70    0.89
  17   2   2   -0.32    0.83
  17   2   1    7.12    1.35
  17   2   1    8.70    1.45
  17   2   0   11.72    1.56
  17   2  -1    5.88    1.30
  17   2  -2    2.35    1.11
  17   2  -3    6.67    1.42
  17   2  -4   -0.21    1.02
  17   2  -5    0.78    1.12
  17   2  -6    1.86    1.18
  17   2  -7    3.67    1.29
  16   2   6   -0.31    0.77
  16   2   5    3.39    1.06
  16   2   4    1.13    0.90
  16   2   3   -0.25    0.80
  16   2   2   -0.05    0.77
  16   2   2    1.00    0.93
  16   2   1    1.98    1.00
  16   2   1    3.01    1.04
  16   2   0   15.33    1.67
  16   2  -1   17.07    1.82
  16   2  -2    3.12    1.13
  16   2  -3    1.21    1.03
  16   2  -4    1.20    1.00
  16   2  -5    9.48    1.58
  16   2  -6    0.56    1.03
  16   2  -7    0.79    1.05
 -16  -2   8    2.09    1.44
  16   2  -8    1.50    1.16
 -16  -2   9    5.17    1.61
  16   2  -9    5.02    1.39
  15   2   8    0.99    0.92
  15   2   7    7.31    1.37
  15   2   6    3.22    1.07
  15   2   5    0.43    0.78
  15   2   4   -0.09    0.77
  15   2   3   20.24    1.85
  15   2   2   -0.34    0.78
  15   2   2    0.01    0.77
  15   2   1   16.74    1.62
  15   2   1   13.93    1.62
  15   2   0    0.89    0.81
  15   2   0    2.38    0.97
  15   2  -1    2.63    1.02
  15   2  -2    2.45    1.05
  15   2  -3    0.76    0.91
  15   2  -4    1.05    0.93
  15   2  -5    1.02    0.98
  15   2  -6    0.22    0.97
  15   2  -7   10.10    1.58
 -15  -2   8    0.66    1.28
  15   2  -8    0.21    0.98
 -15  -2   9    4.93    1.64
  15   2  -9    3.36    1.25
 -15  -2  10   -0.25    1.49
  15   2 -10    2.55    1.25
  14   2   9    4.76    1.23
  14   2   8    4.84    1.28
  14   2   7   -0.76    0.77
  14   2   6   -0.12    0.74
  14   2   5    3.66    0.99
  14   2   4    0.59    0.74
  14   2   3    0.35    0.73
  14   2   3    2.90    0.89
  14   2   2    0.29    0.70
  14   2   2    0.55    0.79
  14   2   1   22.99    1.80
  14   2   1   17.43    1.61
  14   2   0    0.95    0.77
  14   2   0    1.87    0.94
  14   2  -1    0.61    0.88
  14   2  -2    6.84    1.22
  14   2  -3    7.42    1.29
  14   2  -4    5.27    1.22
  14   2  -5    6.64    1.28
  14   2  -6    7.46    1.38
  14   2  -7    1.14    0.97
 -14  -2   8   -0.80    1.22
  14   2  -8    0.21    0.98
 -14  -2   9    2.44    1.46
  14   2  -9    1.07    1.06
 -14  -2  10    1.33    1.48
  14   2 -10    0.40    1.06
 -14  -2  11   -1.10    1.49
  14   2 -11    0.43    1.08
  13   2  10    0.39    0.90
  13   2   9   -0.61    0.77
  13   2   8    3.23    1.03
  13   2   7    7.69    1.29
  13   2   6   12.95    1.55
  13   2   5    1.45    0.79
  13   2   4   14.97    1.45
  13   2   4   16.00    1.61
  13   2   3    3.43    0.96
  13   2   3    2.79    0.88
  13   2   2   -0.34    0.59
  13   2   2    0.16    0.73
  13   2   1   14.66    1.47
  13   2   1   16.14    1.52
  13   2   0    0.18    0.66
  13   2   0    0.21    0.74
  13   2  -1    1.62    0.85
  13   2  -2    6.62    1.16
  13   2  -3   62.31    2.69
  13   2  -4    0.79    0.93
  13   2  -5   -0.61    0.82
  13   2  -6    1.39    0.94
  13   2  -7    1.92    1.02
 -13  -2   8   -0.38    1.10
  13   2  -8   -0.61    0.84
 -13  -2   9    0.52    1.27
  13   2  -9    2.01    1.10
 -13  -2  10   -0.55    1.34
  13   2 -10   -0.32    0.94
 -13  -2  11    1.19    1.55
  13   2 -11    3.23    1.24
 -13  -2  12    0.63    1.63
  13   2 -12    1.09    1.19
  12   2  11    2.04    1.06
  12   2  10    0.95    0.96
  12   2   9   13.33    1.66
  12   2   8   -0.61    0.68
  12   2   7    0.02    0.68
  12   2   6    6.58    1.15
  12   2   5    0.87    0.68
  12   2   4    6.52    1.08
  12   2   4   11.22    1.20
  12   2   3    7.88    1.09
  12   2   3    5.41    1.00
  12   2   2    0.02    0.69
  12   2   2    1.15    0.68
  12   2   1   43.91    2.16
  12   2   1   44.21    2.16
  12   2   0    0.12    0.71
  12   2   0    0.34    0.62
  12   2  -1   15.62    1.43
  12   2  -1   14.70    1.47
  12   2  -2    7.14    1.16
  12   2  -3    1.76    0.90
  12   2  -4    1.28    0.86
  12   2  -5    3.13    0.97
  12   2  -6   22.37    1.84
 -12  -2   7   -0.80    0.99
  12   2  -7   -1.04    0.75
 -12  -2   8    2.07    1.17
  12   2  -8    1.82    0.95
 -12  -2   9   10.59    1.69
  12   2  -9   11.04    1.54
 -12  -2  10    0.59    1.30
  12   2 -10   -0.54    0.85
 -12  -2  11    0.33    1.45
  12   2 -11    2.26    1.16
 -12  -2  12   -0.46    1.46
  12   2 -12   -0.04    1.02
 -12  -2  13   -0.41    1.60
 -12  -2  13    6.49    1.50
  12   2 -13    1.40    1.29
  11   2  12    0.26    0.94
  11   2  11    0.26    0.90
  11   2  10    1.25    0.93
  11   2   9    1.86    0.94
  11   2   8    6.03    1.19
  11   2   7    9.84    1.34
  11   2   6   -0.34    0.59
  11   2   5    1.14    0.68
  11   2   5    1.60    0.72
  11   2   4    1.01    0.67
  11   2   4    1.02    0.66
  11   2   3    1.97    0.72
  11   2   3    3.13    0.80
  11   2   2   26.67    1.62
  11   2   2   26.76    1.71
  11   2   1   25.00    1.64
  11   2   1   25.01    1.64
  11   2   0   15.72    1.52
  11   2   0   16.37    1.48
  11   2  -1   11.12    1.25
  11   2  -1   12.01    1.24
  11   2  -2    4.87    0.97
  11   2  -3   98.06    3.20
  11   2  -4   21.02    1.65
  11   2  -5   20.26    1.66
  11   2  -6   18.26    1.66
 -11  -2   7   12.30    1.58
  11   2  -7   11.46    1.46
 -11  -2   8   14.84    1.71
  11   2  -8   12.94    1.52
 -11  -2   9    0.36    1.18
  11   2  -9    0.80    0.93
 -11  -2  10    2.86    1.39
  11   2 -10    4.13    1.14
 -11  -2  11    1.40    1.42
  11   2 -11   -0.03    0.92
 -11  -2  12    1.44    1.52
  11   2 -12    1.90    1.13
 -11  -2  13   -0.82    1.56
 -11  -2  13    4.01    1.31
  10   2  12    1.82    1.09
  10   2  11    5.73    1.33
  10   2  10    4.07    1.10
  10   2   9    3.24    1.01
  10   2   8    1.27    0.79
  10   2   7    6.83    1.13
  10   2   6    0.25    0.60
  10   2   5    7.71    1.05
  10   2   5    6.58    0.91
  10   2   4    4.97    0.85
  10   2   4    5.14    0.86
  10   2   3    0.14    0.55
  10   2   3    0.90    0.67
  10   2   2    2.67    0.74
  10   2   2    1.66    0.65
  10   2   1   20.28    1.47
  10   2   1   19.02    1.46
  10   2   0    0.18    0.53
  10   2   0    1.03    0.69
  10   2  -1    0.05    0.52
  10   2  -1   -0.50    0.63
  10   2  -2    1.17    0.74
  10   2  -3    1.21    0.76
  10   2  -4    2.48    0.84
  10   2  -5   12.94    1.35
  10   2  -6    5.29    1.07
 -10  -2   7   26.34    2.18
  10   2  -7   25.08    1.80
 -10  -2   8   16.87    1.78
  10   2  -8   19.01    1.66
 -10  -2   9    3.14    1.32
  10   2  -9    5.06    1.13
 -10  -2  10   17.29    1.94
  10   2 -10   20.27    1.75
 -10  -2  11   -0.51    1.23
  10   2 -11   -0.11    0.88
 -10  -2  12    1.19    1.11
 -10  -2  12   -0.40    1.41
  10   2 -12    0.38    0.99
 -10  -2  13   14.29    1.78
 -10  -2  13    9.10    1.91
 -10  -2  14   -2.10    1.48
 -10  -2  14    4.06    1.27
   9   2  13   -0.99    0.87
   9   2  12    3.58    1.19
   9   2  11   -0.48    0.79
   9   2  10    2.98    0.99
   9   2   9    1.10    0.84
   9   2   8   -0.26    0.61
   9   2   7   56.44    2.57
   9   2   6    4.52    0.79
   9   2   6    4.06    0.85
   9   2   5    8.25    1.07
   9   2   5    7.19    0.89
   9   2   4    5.62    0.81
   9   2   4    3.30    0.77
   9   2   3   39.79    1.89
   9   2   3   39.54    1.72
   9   2   2   79.01    2.63
   9   2   2   75.78    2.42
   9   2   1    9.95    1.05
   9   2   1    9.83    1.03
   9   2   0    2.22    0.65
   9   2   0    1.67    0.67
   9   2  -1    4.29    0.83
   9   2  -1    6.78    0.87
   9   2  -2    1.09    0.67
   9   2  -3   26.24    1.60
   9   2  -4    1.64    0.75
   9   2  -5   -0.21    0.66
   9   2  -6   -0.52    0.72
  -9  -2   7   30.15    2.23
   9   2  -7   27.15    1.82
  -9  -2   8    0.45    1.04
   9   2  -8   -0.68    0.69
  -9  -2   9    8.83    1.49
   9   2  -9   10.20    1.34
  -9  -2  10    2.86    1.29
   9   2 -10    1.23    0.88
  -9  -2  11    4.10    1.43
   9   2 -11    3.49    1.11
  -9  -2  12    2.90    1.50
  -9  -2  12    9.25    1.39
   9   2 -12    5.39    1.27
  -9  -2  13    7.64    1.38
  -9  -2  13    2.46    1.49
  -9  -2  14    0.72    1.13
  -9  -2  14   -0.76    1.42
   8   2  13    6.99    1.42
   8   2  12   -0.89    0.78
   8   2  11    1.88    0.94
   8   2  10   22.86    1.94
   8   2   9    1.78    0.87
   8   2   8    3.11    0.89
   8   2   7    3.54    0.86
   8   2   6    3.02    0.77
   8   2   6    2.68    0.68
   8   2   5    6.97    0.96
   8   2   5    7.69    0.87
   8   2   4    3.31    0.71
   8   2   4    3.75    0.71
   8   2   3   10.70    1.10
   8   2   3    8.79    0.94
   8   2   2   11.31    1.08
   8   2   2   11.96    1.18
   8   2   1    7.60    0.86
   8   2   1    6.97    0.86
   8   2   0   29.05    1.44
   8   2   0   28.36    1.46
   8   2  -1   40.57    1.72
   8   2  -1   43.29    1.80
   8   2  -2   78.47    2.52
   8   2  -3   10.40    1.09
   8   2  -4    0.50    0.60
   8   2  -5   79.53    2.64
  -8  -2   6   20.04    2.04
   8   2  -6   18.68    1.49
  -8  -2   7    1.57    1.07
   8   2  -7    1.16    0.78
  -8  -2   8    1.16    1.05
   8   2  -8    1.53    0.80
  -8  -2   9    5.12    1.29
   8   2  -9    5.52    1.03
  -8  -2  10    3.56    1.28
   8   2 -10    3.44    0.99
  -8  -2  11    1.22    1.28
   8   2 -11    1.81    0.96
  -8  -2  12    1.36    1.29
  -8  -2  12    3.18    1.06
   8   2 -12   -1.16    0.85
  -8  -2  13    0.75    1.39
  -8  -2  13    0.35    1.02
  -8  -2  14   -1.33    1.37
  -8  -2  14    5.77    1.33
  -8  -2  15    3.13    1.64
   7   2  14   -1.55    0.78
   7   2  13    0.01    0.92
   7   2  12    1.61    1.01
   7   2  11    1.94    0.95
   7   2  10    0.80    0.80
   7   2   9    0.44    0.68
   7   2   8    0.23    0.64
   7   2   7   67.36    2.09
   7   2   7   64.26    2.60
   7   2   6    3.95    0.80
   7   2   6    4.00    0.71
   7   2   5    0.84    0.56
   7   2   5    1.44    0.59
   7   2   4    9.09    0.96
   7   2   4   10.13    0.99
   7   2   3  189.16    4.34
   7   2   3  178.51    3.97
   7   2   2    0.34    0.47
   7   2   2    0.51    0.42
   7   2   1   61.17    2.05
   7   2   1   61.71    1.94
   7   2   0   18.29    1.20
   7   2   0   17.24    1.17
   7   2  -1   27.22    1.34
   7   2  -1   25.58    1.32
   7   2  -2  103.55    2.79
   7   2  -3   14.05    1.11
   7   2  -4    3.54    0.73
   7   2  -5   21.25    1.38
  -7  -2   6   -0.73    0.83
   7   2  -6    0.16    0.64
  -7  -2   7   11.53    1.44
   7   2  -7    9.68    1.16
  -7  -2   8    0.90    1.08
   7   2  -8    2.74    0.87
  -7  -2   9    6.24    1.29
   7   2  -9    7.41    1.08
  -7  -2  10    2.18    1.21
   7   2 -10    2.57    0.91
  -7  -2  11    3.04    0.98
  -7  -2  11    2.17    1.26
   7   2 -11    1.77    0.93
  -7  -2  12    7.41    1.51
  -7  -2  12    9.91    1.34
  -7  -2  13    3.43    1.08
  -7  -2  13   -0.10    1.28
  -7  -2  14    2.92    1.53
  -7  -2  15   -1.58    1.26
   6   2  14    0.70    1.05
   6   2  13    2.53    1.12
   6   2  12    0.41    0.83
   6   2  11    1.99    0.92
   6   2  10   20.25    1.77
   6   2   9    0.70    0.71
   6   2   8   15.91    1.52
   6   2   7    2.41    0.74
   6   2   7    4.03    0.73
   6   2   6   13.66    1.14
   6   2   6   14.46    1.30
   6   2   5    5.05    0.68
   6   2   5    3.49    0.70
   6   2   4   21.84    1.13
   6   2   4   21.78    1.33
   6   2   3   79.71    2.35
   6   2   3   78.94    2.13
   6   2   2    3.67    0.59
   6   2   2    4.25    0.60
   6   2   1  137.50    3.22
   6   2   1  135.01    3.11
   6   2   0   30.30    1.29
   6   2   0   29.60    1.34
   6   2  -1   68.53    2.05
   6   2  -1   71.60    2.05
   6   2  -2    0.25    0.43
   6   2  -3   19.30    1.14
   6   2  -4   21.00    1.21
  -6  -2   5   13.66    1.20
   6   2  -5   13.06    1.10
  -6  -2   6    9.66    1.18
   6   2  -6    8.78    1.00
  -6  -2   7    3.99    1.08
   6   2  -7    4.62    0.88
  -6  -2   8    5.15    1.25
   6   2  -8    4.88    0.96
  -6  -2   9    8.77    1.38
   6   2  -9    9.88    1.20
  -6  -2  10    0.16    1.02
   6   2 -10   -0.62    0.69
  -6  -2  11    6.45    1.11
  -6  -2  11    5.84    1.35
   6   2 -11    8.08    1.21
  -6  -2  12    5.08    1.36
  -6  -2  12    7.30    1.17
  -6  -2  13    1.22    0.98
  -6  -2  13    0.37    1.18
  -6  -2  14   12.79    1.87
  -6  -2  15    4.14    1.55
   5   2  15    0.27    1.03
   5   2  14    4.22    1.26
   5   2  13   18.96    1.97
   5   2  12    0.09    0.79
   5   2  11    2.20    0.93
   5   2  10    5.15    1.03
   5   2   9   -0.31    0.60
   5   2   8   26.47    1.79
   5   2   8   27.87    1.52
   5   2   7   12.58    1.20
   5   2   7   15.37    1.23
   5   2   6   61.36    2.23
   5   2   6   62.19    1.90
   5   2   5    0.67    0.48
   5   2   5    0.25    0.45
   5   2   4    1.32    0.47
   5   2   4    1.14    0.47
   5   2   3  133.22    3.16
   5   2   3  135.79    2.95
   5   2   2    2.17    0.44
   5   2   2    2.97    0.48
   5   2   1   43.05    1.40
   5   2   1   45.84    1.52
   5   2   0    1.26    0.43
   5   2   0    1.14    0.37
   5   2  -1    0.32    0.38
   5   2  -1    0.33    0.31
   5   2  -2   17.85    1.01
   5   2  -3  214.54    4.50
   5   2  -4   30.18    1.32
  -5  -2   5    0.03    0.61
   5   2  -5    0.61    0.50
  -5  -2   6    2.55    0.85
   5   2  -6    2.17    0.64
  -5  -2   7   12.14    1.33
   5   2  -7   14.02    1.25
  -5  -2   8    0.71    0.95
   5   2  -8    0.22    0.65
  -5  -2   9   31.02    2.31
   5   2  -9   25.62    1.61
  -5  -2  10    5.22    0.97
  -5  -2  10    5.07    1.17
   5   2 -10    4.11    0.94
  -5  -2  11   24.50    1.64
  -5  -2  11   18.72    1.81
  -5  -2  12    0.81    0.87
  -5  -2  12    1.72    1.12
  -5  -2  13    1.89    1.20
  -5  -2  14    0.01    1.24
  -5  -2  15   -0.06    1.23
  -5  -2  16   -0.16    1.30
   4   2  15    0.46    1.08
   4   2  14   -0.12    0.97
   4   2  13    2.02    1.03
   4   2  12    1.72    0.91
   4   2  11   -0.16    0.72
   4   2  10   10.10    1.24
   4   2   9   16.30    1.51
   4   2   9   16.53    1.56
   4   2   8    7.09    1.01
   4   2   8    9.80    1.04
   4   2   7    0.84    0.58
   4   2   7    0.65    0.67
   4   2   6   21.15    1.25
   4   2   6   21.61    1.39
   4   2   5    0.72    0.46
   4   2   5    1.04    0.50
   4   2   4   51.03    1.73
   4   2   4   52.57    1.55
   4   2   3  119.98    2.83
   4   2   3  120.71    2.62
   4   2   2  132.57    2.94
   4   2   2  132.67    2.81
   4   2   1  370.08    6.75
   4   2   1  371.58    6.81
   4   2   0    1.07    0.33
   4   2   0    1.28    0.39
   4   2  -1  140.88    3.02
   4   2  -1  145.21    3.04
   4   2  -2    1.66    0.43
   4   2  -3    0.57    0.40
  -4  -2   4   18.21    1.22
   4   2  -4   16.79    0.98
  -4  -2   5   12.07    1.04
   4   2  -5   13.72    0.95
  -4  -2   6   78.90    2.57
   4   2  -6   76.89    2.23
  -4  -2   7    5.95    1.03
   4   2  -7    8.77    0.94
  -4  -2   8   10.16    1.29
   4   2  -8   11.87    1.19
  -4  -2   9   63.45    2.77
   4   2  -9   58.11    2.18
  -4  -2  10   11.87    1.14
  -4  -2  10    8.40    1.29
  -4  -2  11    3.85    1.12
  -4  -2  11    4.15    0.90
  -4  -2  12    8.01    1.42
  -4  -2  12   13.58    1.33
  -4  -2  13    2.37    1.20
  -4  -2  14   -0.14    1.13
  -4  -2  15    4.54    1.48
  -4  -2  16   -3.24    1.08
   3   2  15   -2.38    0.87
   3   2  14    7.38    1.41
   3   2  13   13.81    1.65
   3   2  12    1.92    0.91
   3   2  11    4.63    0.99
   3   2  10    0.33    0.67
   3   2   9   14.97    1.25
   3   2   9   15.00    1.50
   3   2   8    0.68    0.64
   3   2   8    2.01    0.80
   3   2   7   94.96    2.60
   3   2   7   94.27    2.84
   3   2   6   17.67    1.23
   3   2   6   18.73    1.27
   3   2   5   17.23    1.12
   3   2   5   16.71    1.11
   3   2   4  180.45    3.87
   3   2   4  184.35    3.70
   3   2   3  172.50    3.41
   3   2   3  167.62    3.53
   3   2   2  539.35    9.55
   3   2   2  554.82    9.63
   3   2   1   68.81    1.68
   3   2   1   67.92    1.72
   3   2   0   10.33    0.70
   3   2   0   10.97    0.73
   3   2  -1  102.37    2.27
   3   2  -2   26.81    1.03
  -3  -2   3  216.65    4.37
   3   2  -3  221.20    4.31
  -3  -2   4   18.20    1.23
   3   2  -4   15.69    0.86
  -3  -2   5    0.26    0.55
   3   2  -5    0.24    0.38
  -3  -2   6  109.92    3.03
   3   2  -6  107.16    2.66
  -3  -2   7    9.66    1.12
   3   2  -7   10.67    0.99
  -3  -2   8   80.86    2.89
   3   2  -8   86.75    2.48
  -3  -2   9    3.71    1.05
  -3  -2   9    7.45    0.95
  -3  -2  10    7.46    0.95
  -3  -2  10    6.52    1.18
  -3  -2  11   15.55    1.38
  -3  -2  11   10.04    1.36
  -3  -2  12   -0.22    0.95
  -3  -2  13    7.37    1.40
  -3  -2  14   -0.09    1.05
  -3  -2  15    1.22    1.27
  -3  -2  16   -1.32    1.18
   2   2  16    3.66    1.32
   2   2  15   -1.02    0.97
   2   2  14    7.41    1.40
   2   2  13    2.53    1.02
   2   2  12    4.26    1.03
   2   2  11    2.41    0.89
   2   2  10   -0.05    0.65
   2   2  10   -0.74    0.81
   2   2   9   56.43    2.27
   2   2   9   57.37    2.38
   2   2   8    1.53    0.69
   2   2   8    1.87    0.82
   2   2   7    0.99    0.57
   2   2   7    0.71    0.68
   2   2   6   14.39    1.19
   2   2   6   14.22    1.12
   2   2   5    0.20    0.38
   2   2   5    0.54    0.50
   2   2   4   10.99    0.84
   2   2   4   11.13    0.91
   2   2   3   33.06    1.14
   2   2   3   32.03    1.14
   2   2   2  333.66    5.94
   2   2   2  327.42    5.95
   2   2   1  138.90    2.73
   2   2   1  140.25    2.73
   2   2   0  699.56   11.86
   2   2   0  689.74   11.75
   2   2  -1  125.16    2.50
  -2  -2   2    1.11    0.21
   2   2  -2    0.09    0.31
  -2  -2   3   23.05    0.58
  -2  -2   3   22.89    1.14
   2   2  -3   21.36    0.86
  -2  -2   4    0.45    0.16
  -2  -2   4    0.06    0.44
   2   2  -4    0.03    0.30
  -2  -2   5   53.52    1.15
  -2  -2   5   53.24    1.89
   2   2  -5   53.56    1.52
  -2  -2   6    2.98    0.70
   2   2  -6    2.96    0.53
  -2  -2   7   15.65    1.54
   2   2  -7   13.45    1.02
  -2  -2   8   45.78    1.68
  -2  -2   8   42.10    2.18
  -2  -2   9    6.80    1.11
  -2  -2   9    8.77    0.92
  -2  -2  10    3.53    1.00
  -2  -2  10    4.85    0.84
  -2  -2  11    0.35    0.85
  -2  -2  11    0.55    0.71
  -2  -2  12    3.06    1.09
  -2  -2  13   -0.34    0.95
  -2  -2  14   -1.21    0.97
  -2  -2  15    7.89    1.55
  -2  -2  16   -1.50    1.09
   1   2  16   -2.42    0.90
   1   2  15   -0.31    0.98
   1   2  14    0.49    1.00
   1   2  13    1.01    0.90
   1   2  12   24.04    1.92
   1   2  11    1.35    0.80
   1   2  10    4.93    1.01
   1   2  10    4.80    0.95
   1   2   9   45.19    2.07
   1   2   9   46.58    2.15
   1   2   8   -0.05    0.62
   1   2   8    0.40    0.75
   1   2   7   15.45    1.27
   1   2   7   14.19    1.27
   1   2   6    3.94    0.63
   1   2   6    3.42    0.66
   1   2   5   22.28    1.15
   1   2   5   22.54    1.14
   1   2   4   13.98    0.87
   1   2   4   14.35    0.95
   1   2   3  108.40    2.37
   1   2   3  113.68    2.37
   1   2   2   17.15    0.93
   1   2   2   15.53    0.68
   1   2   1  575.88    9.78
   1   2   1  568.76    9.63
   1   2   0   27.16    0.75
   1   2   0   25.66    0.68
  -1  -2   1  214.03    3.56
   1   2  -1  225.80    3.93
  -1  -2   2  278.11    4.43
  -1  -2   2  269.69    4.97
   1   2  -2  278.59    4.89
  -1  -2   3   90.00    1.67
  -1  -2   3   92.85    2.19
   1   2  -3   90.26    1.91
  -1  -2   4   39.43    0.96
  -1  -2   4   40.56    1.49
   1   2  -4   38.52    1.10
  -1  -2   5   16.99    0.68
  -1  -2   5   15.13    1.17
   1   2  -5   15.06    0.78
  -1  -2   6   45.64    1.81
  -1  -2   6   42.78    1.19
   1   2  -6   41.84    1.32
  -1  -2   7   12.97    0.95
  -1  -2   7   17.60    1.40
  -1  -2   8   -0.40    0.69
  -1  -2   8    0.48    0.56
  -1  -2   9   35.04    1.51
  -1  -2   9   36.04    2.00
  -1  -2  10    0.54    0.66
  -1  -2  10    0.62    0.79
  -1  -2  11    1.24    0.86
  -1  -2  12    6.88    1.24
  -1  -2  13    2.79    1.06
  -1  -2  14    1.07    1.03
  -1  -2  15   -0.18    1.06
  -1  -2  16   -2.70    1.01
   0   2  16    1.03    1.16
   0   2  15    2.12    1.14
   0   2  14   -0.36    0.95
   0   2  13    1.22    0.96
   0   2  12    3.03    0.96
   0   2  11    1.09    0.79
   0   2  11    0.79    0.90
   0   2  10    3.45    0.86
   0   2  10    3.34    0.97
   0   2   9    8.95    1.10
   0   2   9    9.68    1.13
   0   2   8    7.38    0.94
   0   2   8    8.40    1.00
   0   2   7    3.90    0.75
   0   2   7    2.17    0.62
   0   2   6    3.21    0.58
   0   2   6    3.47    0.67
   0   2   5  118.71    2.65
   0   2   5  114.47    2.69
   0   2   4    1.54    0.37
   0   2   4    1.62    0.46
   0   2   3  512.26    8.86
   0   2   2   35.32    1.06
   0   2   2   37.43    0.94
   0   2   1   22.35    0.69
   0   2   1   21.47    0.52
   0  -2   0  752.13   11.91
   0   2   0  723.66   13.10
   0  -2   1   21.92    0.65
   0  -2   1   21.69    0.58
   0   2  -1   21.35    0.56
   0  -2   2   37.63    1.12
   0  -2   2   34.13    0.84
   0   2  -2   35.85    0.81
   0  -2   3  497.39    8.06
   0  -2   3  516.74    8.86
   0   2  -3  495.06    8.55
   0  -2   4    1.93    0.46
   0  -2   4    1.21    0.26
   0   2  -4    1.08    0.27
   0  -2   5  112.97    2.29
   0  -2   5  112.56    2.30
   0  -2   5  118.35    2.82
   0  -2   6    3.10    0.44
   0  -2   6    3.52    0.65
   0  -2   6    2.58    0.40
   0  -2   7    1.75    0.64
   0  -2   7    2.41    0.49
   0  -2   8    8.99    0.77
   0  -2   8    6.93    0.96
   0  -2   9    9.49    0.87
   0  -2   9    9.08    1.13
   0  -2  10    3.10    0.90
   0  -2  11   -0.28    0.76
   0  -2  12    1.90    0.91
   0  -2  13    1.89    1.02
   0  -2  14   -1.47    0.91
   0  -2  15    3.97    1.28
   0  -2  16   -0.64    1.12
  -1   2  16   -1.65    1.01
  -1   2  15    1.54    1.21
  -1   2  14    0.37    1.01
  -1   2  13    4.44    1.13
  -1   2  12    8.99    1.32
  -1   2  12    7.15    1.17
  -1   2  11    2.27    0.86
  -1   2  11    1.95    0.95
  -1   2  10   -0.01    0.72
  -1   2  10   -0.04    0.86
  -1   2   9   33.64    1.83
  -1   2   9   35.23    1.92
  -1   2   8   -0.30    0.62
  -1   2   8   -0.24    0.68
  -1   2   7   14.94    1.26
  -1   2   7   13.93    1.24
  -1   2   6   38.89    1.50
  -1   2   6   45.39    1.65
  -1   2   5   15.79    0.93
  -1   2   5   15.07    1.05
  -1   2   4   41.10    1.32
  -1   2   4   42.00    1.35
  -1   2   3   92.27    2.04
  -1   2   3   89.25    2.06
  -1   2   2  279.44    4.71
  -1   2   2  258.03    4.83
   1  -2  -1  212.56    3.46
  -1   2   1  217.21    3.59
  -1   2   1  204.81    3.78
   1  -2   0   26.98    0.67
   1  -2   0   27.25    0.57
  -1   2   0   24.37    0.65
   1  -2   1  554.49    9.41
   1  -2   1  575.69    8.87
  -1   2  -1  550.20    9.50
   1  -2   2   16.03    0.67
   1  -2   2   18.80    0.84
   1  -2   3  110.34    2.19
   1  -2   3  114.72    2.49
   1  -2   4   13.65    0.93
   1  -2   4   11.74    0.49
   1  -2   4   12.65    0.69
   1  -2   5   20.37    0.88
   1  -2   5   22.05    1.19
   1  -2   5   19.57    0.70
   1  -2   6    3.38    0.46
   1  -2   6    3.25    0.62
   1  -2   6    3.55    0.43
   1  -2   7   14.80    1.27
   1  -2   7   15.85    0.97
   1  -2   8    0.46    0.67
   1  -2   8    0.07    0.53
   1  -2   9   47.30    1.69
   1  -2   9   44.24    2.14
   1  -2  10    5.45    1.00
   1  -2  11    1.74    0.82
   1  -2  12   24.78    1.97
   1  -2  13    0.11    0.89
   1  -2  14    1.26    1.01
   1  -2  15   -0.27    1.01
   1  -2  16   -1.12    0.99
  -2   2  16   -2.66    1.03
  -2   2  15    9.47    1.61
  -2   2  14   -1.06    0.95
  -2   2  13   -0.82    0.84
  -2   2  12    1.02    0.94
  -2   2  12    5.83    1.21
  -2   2  11    1.13    0.93
  -2   2  11    0.93    0.81
  -2   2  10    4.91    1.00
  -2   2  10    6.84    1.06
  -2   2   9    6.36    1.02
  -2   2   9    7.88    1.07
  -2   2   8   43.20    1.85
  -2   2   8   41.61    1.98
  -2   2   7   13.04    1.32
  -2   2   7   12.62    1.18
  -2   2   6    3.34    0.64
  -2   2   6    3.50    0.66
  -2   2   5   55.08    1.77
  -2   2   5   58.42    1.69
  -2   2   4   -0.02    0.40
  -2   2   4    0.01    0.39
  -2   2   3   22.48    1.01
  -2   2   3   25.23    1.08
   2  -2  -2    0.60    0.20
   2  -2  -2    0.97    0.38
  -2   2   2   -0.67    0.32
  -2   2   2    0.11    0.41
   2  -2  -1  121.59    2.41
   2  -2  -1  120.22    2.11
   2  -2   0  704.94   11.80
   2  -2   0  707.96   11.95
   2  -2   0  703.42   11.10
   2  -2   1  136.64    2.50
   2  -2   1  141.20    2.49
   2  -2   1  135.42    2.62
   2  -2   2  319.59    5.72
   2  -2   2  316.28    5.36
   2  -2   3   29.92    1.13
   2  -2   3   29.30    1.03
   2  -2   4   10.56    0.85
   2  -2   4   10.85    0.74
   2  -2   5    0.20    0.39
   2  -2   5   -0.16    0.28
   2  -2   6   11.14    0.92
   2  -2   6   12.77    1.09
   2  -2   7   -0.08    0.43
   2  -2   7    0.61    0.58
   2  -2   8    1.45    0.72
   2  -2   8    0.99    0.56
   2  -2   9   56.53    2.44
   2  -2  10   -0.07    0.68
   2  -2  11    2.62    0.91
   2  -2  12    3.54    1.01
   2  -2  13    1.35    0.96
   2  -2  14    5.13    1.22
   2  -2  15   -0.31    0.98
   2  -2  16    1.76    1.16
  -3   2  16   -1.59    1.13
  -3   2  15   -0.58    1.13
  -3   2  14   -1.11    1.00
  -3   2  13    7.37    1.32
  -3   2  13   10.65    1.51
  -3   2  12    0.65    0.97
  -3   2  12   -0.22    0.88
  -3   2  11   11.49    1.35
  -3   2  11   12.39    1.34
  -3   2  10   10.00    1.22
  -3   2  10    6.45    1.08
  -3   2   9    6.19    1.06
  -3   2   9    7.42    1.10
  -3   2   8   86.26    2.61
  -3   2   8   88.73    2.85
  -3   2   7    9.43    0.97
  -3   2   7    9.17    0.99
  -3   2   6  108.87    2.86
  -3   2   6  111.99    2.74
  -3   2   5    0.52    0.51
  -3   2   5   -0.12    0.48
   3  -2  -4   15.81    0.56
   3  -2  -4   15.87    0.96
  -3   2   4   16.98    1.08
  -3   2   4   15.64    1.00
   3  -2  -3  204.27    3.42
   3  -2  -3  212.41    4.17
  -3   2   3  208.70    4.00
   3  -2  -2   27.88    0.72
   3  -2  -2   26.17    1.05
   3  -2  -1   94.82    1.99
   3  -2  -1   96.85    1.83
   3  -2  -1   97.84    2.14
   3  -2   0   11.07    0.64
   3  -2   0    9.61    0.66
   3  -2   0    9.83    0.62
   3  -2   1   64.00    1.50
   3  -2   1   65.13    1.57
   3  -2   1   64.83    1.42
   3  -2   2  551.03    9.28
   3  -2   2  550.95    9.00
   3  -2   2  543.33    9.58
   3  -2   3  166.22    3.24
   3  -2   3  168.84    3.49
   3  -2   4  164.83    3.33
   3  -2   4  171.50    3.66
   3  -2   5   15.89    0.94
   3  -2   5   18.31    1.15
   3  -2   6   16.09    1.20
   3  -2   6   16.52    1.06
   3  -2   7   92.21    2.84
   3  -2   8    1.87    0.71
   3  -2   9   11.14    1.20
   3  -2  10    0.45    0.69
   3  -2  11    3.94    0.98
   3  -2  12    0.54    0.81
   3  -2  13   11.06    1.48
   3  -2  14    7.73    1.40
   3  -2  15   -0.32    0.97
  -4   2  16   -3.52    1.01
  -4   2  15    4.26    1.40
  -4   2  14    1.72    1.20
  -4   2  13    5.08    1.27
  -4   2  13    2.28    1.13
  -4   2  12   12.68    1.44
  -4   2  12    8.92    1.39
  -4   2  11    1.61    0.95
  -4   2  11    3.09    1.04
  -4   2  10   10.31    1.22
  -4   2  10    8.89    1.26
  -4   2   9   58.04    2.53
  -4   2   9   62.04    2.36
  -4   2   8   10.55    1.17
  -4   2   8    8.12    1.07
  -4   2   7    5.86    0.90
  -4   2   7    6.73    0.97
   4  -2  -6   79.43    2.33
  -4   2   6   79.38    2.44
  -4   2   6   72.38    2.22
   4  -2  -5   12.40    1.07
  -4   2   5   11.92    1.18
   4  -2  -4   15.99    0.99
  -4   2   4   17.66    1.13
   4  -2  -3    0.36    0.40
   4  -2  -3    0.41    0.17
   4  -2  -2    2.56    0.27
   4  -2  -2    2.24    0.48
   4  -2  -1  142.94    2.61
   4  -2  -1  139.67    2.87
   4  -2  -1  145.68    3.00
   4  -2   0    0.98    0.26
   4  -2   0    1.15    0.30
   4  -2   0    0.92    0.34
   4  -2   1  369.64    6.65
   4  -2   1  369.57    6.50
   4  -2   1  358.62    6.20
   4  -2   2  130.63    2.69
   4  -2   2  129.28    2.85
   4  -2   2  132.19    2.55
   4  -2   3  117.62    2.78
   4  -2   3  119.71    2.62
   4  -2   3  122.41    2.31
   4  -2   4   51.76    1.59
   4  -2   4   49.15    1.68
   4  -2   5    1.08    0.44
   4  -2   6   21.23    1.40
   4  -2   6   19.06    1.18
   4  -2   7    0.32    0.56
   4  -2   8    7.90    1.05
   4  -2   9   15.76    1.48
   4  -2  10    8.66    1.19
   4  -2  11   -0.25    0.73
   4  -2  12    0.45    0.82
   4  -2  13    2.69    1.08
   4  -2  14    0.11    0.94
   4  -2  15    3.02    1.21
  -5   2  16    2.35    1.48
  -5   2  15   -2.14    1.07
  -5   2  14    0.63    1.21
  -5   2  14   -1.12    1.05
  -5   2  13    4.86    1.23
  -5   2  13    3.18    1.21
  -5   2  12   -1.88    0.90
  -5   2  12    0.02    0.95
  -5   2  11   18.01    1.69
  -5   2  11   22.09    1.78
  -5   2  10    5.21    1.12
  -5   2  10    3.54    1.06
  -5   2   9   30.15    2.07
  -5   2   9   23.69    1.70
  -5   2   8   -0.20    0.80
  -5   2   8   -0.70    0.87
   5  -2  -7   15.68    1.33
  -5   2   7   13.21    1.33
  -5   2   7   13.15    1.25
   5  -2  -6    2.07    0.68
  -5   2   6    2.66    0.79
   5  -2  -5    0.64    0.53
  -5   2   5    1.45    0.62
   5  -2  -4   31.85    1.41
   5  -2  -3  205.78    4.43
   5  -2  -3  216.56    3.61
   5  -2  -2   17.10    0.99
   5  -2  -2   17.36    0.71
   5  -2  -1   -0.14    0.26
   5  -2  -1    0.25    0.37
   5  -2  -1    0.09    0.22
   5  -2   0    1.32    0.34
   5  -2   0    1.38    0.32
   5  -2   0    1.22    0.40
   5  -2   1   43.31    1.43
   5  -2   1   45.83    1.32
   5  -2   1   46.93    1.37
   5  -2   2    1.65    0.39
   5  -2   2    2.30    0.42
   5  -2   2    1.96    0.38
   5  -2   3  135.49    2.67
   5  -2   3  134.88    3.14
   5  -2   3  130.56    2.90
   5  -2   4    0.64    0.43
   5  -2   4    0.73    0.30
   5  -2   4    1.55    0.47
   5  -2   5    0.73    0.49
   5  -2   5    0.50    0.43
   5  -2   6   60.63    2.21
   5  -2   7   12.20    1.19
   5  -2   8   27.07    1.79
   5  -2   9    0.24    0.63
   5  -2  10    4.84    1.02
   5  -2  11    3.79    1.00
   5  -2  12   -0.02    0.81
   5  -2  13   22.74    2.08
   5  -2  14    2.97    1.18
   5  -2  15   -0.87    0.89
  -6   2  15    3.23    1.40
  -6   2  14   15.56    1.77
  -6   2  14   11.24    1.66
  -6   2  13   -0.86    1.06
  -6   2  13    2.34    1.12
  -6   2  12    7.82    1.33
  -6   2  12    5.46    1.29
  -6   2  11    7.65    1.26
  -6   2  11    6.38    1.28
  -6   2  10    0.11    0.88
  -6   2  10    0.20    0.94
  -6   2   9    9.15    1.31
  -6   2   9   10.75    1.28
  -6   2   8    3.34    1.01
  -6   2   8    4.38    1.12
   6  -2  -7    4.90    0.94
  -6   2   7    4.81    1.03
   6  -2  -6    7.92    1.00
  -6   2   6    9.17    1.08
   6  -2  -5   13.66    1.21
  -6   2   5   12.13    1.06
   6  -2  -4   21.80    1.30
   6  -2  -4   21.99    0.69
   6  -2  -3   18.01    1.16
   6  -2  -3   17.31    0.72
   6  -2  -2   -0.36    0.44
   6  -2  -2    0.53    0.25
   6  -2  -1   72.67    1.73
   6  -2  -1   73.54    2.03
   6  -2  -1   68.82    1.94
   6  -2   0   27.89    1.15
   6  -2   0   29.52    1.10
   6  -2   0   27.85    1.20
   6  -2   1  132.50    2.92
   6  -2   1  131.37    3.06
   6  -2   1  135.63    2.87
   6  -2   2    3.88    0.52
   6  -2   2    3.18    0.48
   6  -2   2    3.09    0.53
   6  -2   3   80.73    1.93
   6  -2   3   78.91    2.18
   6  -2   3   80.39    2.31
   6  -2   4   20.14    1.24
   6  -2   4   19.56    1.28
   6  -2   4   19.50    0.86
   6  -2   5    3.77    0.66
   6  -2   5    3.93    0.71
   6  -2   5    3.67    0.45
   6  -2   6   14.27    1.35
   6  -2   7    3.59    0.81
   6  -2   8   15.58    1.47
   6  -2   9   -0.32    0.60
   6  -2  10   18.57    1.72
   6  -2  11    3.05    0.98
   6  -2  12   -0.36    0.81
   6  -2  13    2.86    1.14
   6  -2  14   -0.62    0.92
  -7   2  15   -0.39    1.31
  -7   2  14    4.25    1.35
  -7   2  14    2.78    1.40
  -7   2  13   -0.49    1.13
  -7   2  13    2.83    1.18
  -7   2  12    5.81    1.40
  -7   2  12    9.38    1.41
  -7   2  11    1.44    1.14
  -7   2  11    3.97    1.16
  -7   2  10    4.25    1.04
  -7   2  10    1.01    1.06
  -7   2   9    5.34    1.20
  -7   2   9    6.43    1.12
   7  -2  -8    2.48    0.93
  -7   2   8    1.56    1.08
  -7   2   8    1.80    0.95
   7  -2  -7   13.01    1.32
  -7   2   7   11.15    1.32
   7  -2  -6    0.28    0.71
  -7   2   6    0.07    0.81
   7  -2  -5   20.78    1.45
   7  -2  -4    2.90    0.33
   7  -2  -4    3.50    0.77
   7  -2  -3   12.79    0.71
   7  -2  -3   13.57    1.15
   7  -2  -2  106.08    2.26
   7  -2  -2  105.66    2.80
   7  -2  -1   28.67    1.37
   7  -2  -1   28.17    1.29
   7  -2   0   17.36    1.00
   7  -2   0   15.76    1.05
   7  -2   0   16.77    1.06
   7  -2   1   61.70    1.84
   7  -2   1   62.35    1.98
   7  -2   1   61.45    1.81
   7  -2   2    0.15    0.37
   7  -2   2    0.09    0.38
   7  -2   2    0.38    0.42
   7  -2   3  178.50    4.16
   7  -2   3  174.79    3.68
   7  -2   3  182.76    3.91
   7  -2   4    8.70    0.78
   7  -2   4    7.75    0.84
   7  -2   4    9.13    0.95
   7  -2   5    1.67    0.60
   7  -2   5    1.15    0.44
   7  -2   6    3.14    0.76
   7  -2   7   61.17    2.49
   7  -2   8    1.29    0.74
   7  -2   9    0.89    0.71
   7  -2  10    0.45    0.74
   7  -2  11    3.35    1.05
   7  -2  12    3.04    1.07
   7  -2  13    0.23    0.97
   7  -2  14    0.81    1.03
  -8   2  15   -0.82    1.34
  -8   2  15    5.49    1.54
  -8   2  14   -0.13    1.18
  -8   2  14   -0.30    1.34
  -8   2  13    3.21    1.22
  -8   2  13   -0.34    1.24
  -8   2  12   -1.02    1.13
  -8   2  12    2.44    1.14
  -8   2  11    1.07    0.99
  -8   2  11   -0.50    1.09
  -8   2  10    3.65    1.10
  -8   2  10    3.45    1.23
   8  -2  -9    5.20    1.12
  -8   2   9    5.21    1.12
  -8   2   9    5.33    1.26
   8  -2  -8    0.95    0.83
  -8   2   8    0.07    0.96
   8  -2  -7    1.24    0.84
  -8   2   7    1.59    1.03
   8  -2  -6   17.88    1.58
  -8   2   6   18.47    1.53
   8  -2  -5   83.74    2.80
   8  -2  -4   -0.84    0.61
   8  -2  -3   11.16    0.78
   8  -2  -3    8.91    1.03
   8  -2  -2   76.78    2.39
   8  -2  -2   73.17    1.87
   8  -2  -1   40.05    1.63
   8  -2  -1   40.75    1.42
   8  -2  -1   41.45    1.69
   8  -2   0   29.58    1.43
   8  -2   0   29.06    1.26
   8  -2   0   30.62    1.42
   8  -2   1    8.19    0.84
   8  -2   1    8.42    0.78
   8  -2   1    9.12    0.93
   8  -2   2   12.48    1.00
   8  -2   2   10.10    0.90
   8  -2   2   11.49    1.07
   8  -2   3    9.76    0.91
   8  -2   3    8.50    0.93
   8  -2   4    3.16    0.59
   8  -2   4    3.20    0.71
   8  -2   5    5.45    0.88
   8  -2   5    7.66    0.71
   8  -2   6    0.65    0.64
   8  -2   7    1.39    0.70
   8  -2   8    2.78    0.85
   8  -2   9    1.59    0.81
   8  -2  10   23.65    1.93
   8  -2  11    0.22    0.81
   8  -2  12   -0.26    0.82
   8  -2  13    5.59    1.27
  -9   2  14   -1.16    1.34
  -9   2  14    1.14    1.21
  -9   2  13    5.61    1.41
  -9   2  13    3.26    1.49
  -9   2  12    6.12    1.49
  -9   2  12    7.99    1.42
  -9   2  11    4.31    1.36
  -9   2  11    2.92    1.11
  -9   2  10    0.37    1.10
  -9   2  10    0.91    0.96
   9  -2  -9    9.49    1.38
  -9   2   9    8.67    1.31
  -9   2   9    8.45    1.44
   9  -2  -8    0.62    0.88
  -9   2   8    0.54    0.98
   9  -2  -7   28.58    1.89
  -9   2   7   30.78    2.10
   9  -2  -6   -0.10    0.83
  -9   2   6   -0.01    0.90
   9  -2  -5   -0.80    0.74
   9  -2  -4    0.94    0.78
   9  -2  -3   25.83    1.63
   9  -2  -2    1.16    0.73
   9  -2  -1    5.65    0.90
   9  -2  -1    7.00    0.83
   9  -2   0    3.75    0.69
   9  -2   0    3.25    0.77
   9  -2   1    9.60    1.00
   9  -2   1   10.76    1.07
   9  -2   2   76.71    2.56
   9  -2   2   78.53    2.30
   9  -2   3   39.93    1.54
   9  -2   3   38.01    1.85
   9  -2   4    4.63    0.69
   9  -2   4    3.58    0.76
   9  -2   5    6.82    0.97
   9  -2   6    4.05    0.87
   9  -2   7   60.45    2.63
   9  -2   8    1.12    0.73
   9  -2   9    0.27    0.75
   9  -2  10    2.32    0.93
   9  -2  11   -0.45    0.79
   9  -2  12    3.74    1.19
   9  -2  13    0.31    0.95
 -10   2  14   -1.13    1.43
 -10   2  14    2.67    1.36
 -10   2  13    8.82    1.79
 -10   2  13   15.65    1.85
 -10   2  12   -1.58    1.25
 -10   2  12    0.27    1.10
 -10   2  11    0.94    1.04
 -10   2  11   -1.06    1.22
 -10   2  10   21.83    1.88
 -10   2  10   23.06    2.30
  10  -2  -9    4.75    1.15
 -10   2   9    3.62    1.23
 -10   2   9    4.14    1.16
 -10   2   8   19.94    1.82
  10  -2  -7   27.15    1.90
 -10   2   7   28.27    2.10
  10  -2  -6    4.80    1.06
  10  -2  -5   12.54    1.44
  10  -2  -4    2.88    0.94
  10  -2  -3    0.40    0.74
  10  -2  -2    2.73    0.84
  10  -2  -1    0.37    0.53
  10  -2  -1    0.08    0.69
  10  -2   0   -0.02    0.66
  10  -2   0    1.76    0.60
  10  -2   1   20.56    1.43
  10  -2   1   19.86    1.40
  10  -2   2    1.75    0.68
  10  -2   2    1.23    0.59
  10  -2   3    0.75    0.58
  10  -2   3    1.04    0.63
  10  -2   4    6.23    0.79
  10  -2   4    6.08    0.95
  10  -2   5    6.73    1.01
  10  -2   6    0.17    0.62
  10  -2   7    6.74    1.12
  10  -2   8    2.41    0.90
  10  -2   9    4.08    1.07
  10  -2  10    3.44    1.07
  10  -2  11    4.42    1.23
  10  -2  12    1.47    1.08
 -11   2  13    2.26    1.51
 -11   2  13    3.62    1.38
 -11   2  12    5.03    1.33
 -11   2  12    2.18    1.52
 -11   2  11   -0.41    1.28
 -11   2  11   -0.01    1.11
  11  -2 -10    4.19    1.24
 -11   2  10    3.98    1.41
 -11   2  10    6.63    1.36
  11  -2  -9    1.31    1.00
 -11   2   9    0.18    1.12
  11  -2  -8   14.26    1.66
 -11   2   8   13.16    1.60
  11  -2  -7   11.69    1.48
 -11   2   7    9.41    1.40
  11  -2  -6   19.17    1.72
  11  -2  -5   20.97    1.79
  11  -2  -4   23.61    1.74
  11  -2  -3   98.08    3.25
  11  -2  -2    4.69    1.02
  11  -2  -1   11.76    1.17
  11  -2  -1   11.80    1.24
  11  -2   0   15.57    1.39
  11  -2   0   13.42    1.35
  11  -2   1   25.10    1.55
  11  -2   1   27.09    1.64
  11  -2   2   27.47    1.69
  11  -2   2   26.68    1.52
  11  -2   3    2.89    0.77
  11  -2   3    3.47    0.76
  11  -2   4    0.65    0.60
  11  -2   5    0.17    0.61
  11  -2   6    0.71    0.68
  11  -2   7   10.33    1.34
  11  -2   8    6.34    1.19
  11  -2   9    0.61    0.84
  11  -2  10    0.22    0.85
  11  -2  11    0.06    0.86
  11  -2  12    0.95    1.02
 -12   2  13    5.78    1.56
 -12   2  13    2.16    1.61
 -12   2  12    1.08    1.19
 -12   2  12   -2.03    1.34
 -12   2  11   -1.03    1.29
 -12   2  11    3.19    1.27
  12  -2 -10    1.63    1.11
 -12   2  10    0.24    1.26
 -12   2  10   -0.75    1.06
  12  -2  -9   10.68    1.62
 -12   2   9   11.98    1.64
  12  -2  -8    1.05    1.00
 -12   2   8    2.21    1.15
  12  -2  -7    0.60    0.93
 -12   2   7    0.66    0.98
  12  -2  -6   26.20    2.00
  12  -2  -5    4.39    1.13
  12  -2  -4    0.83    0.86
  12  -2  -3    1.84    0.93
  12  -2  -2    9.76    1.28
  12  -2  -1   12.03    1.24
  12  -2  -1   12.78    1.34
  12  -2   0   -0.22    0.67
  12  -2   0    0.02    0.56
  12  -2   1   43.82    2.04
  12  -2   1   46.44    2.22
  12  -2   2    0.70    0.71
  12  -2   2    0.04    0.60
  12  -2   3    7.27    1.05
  12  -2   3    6.34    0.98
  12  -2   4    8.35    1.16
  12  -2   5    0.07    0.62
  12  -2   6    8.11    1.21
  12  -2   7   -0.35    0.66
  12  -2   8   -0.37    0.73
  12  -2   9   14.25    1.74
  12  -2  10    1.10    0.94
  12  -2  11    1.21    0.99
 -13   2  12   -0.30    1.51
 -13   2  12    3.32    1.34
 -13   2  11    2.79    1.30
 -13   2  11   -0.98    1.37
  13  -2 -10   -0.21    1.04
 -13   2  10   -0.32    1.14
 -13   2  10   -0.48    1.34
  13  -2  -9    1.85    1.12
 -13   2   9    1.04    1.24
  13  -2  -8    0.02    0.97
 -13   2   8   -0.99    1.00
  13  -2  -7    2.99    1.12
 -13   2   7    3.61    1.18
  13  -2  -6    2.55    1.10
  13  -2  -5    0.47    0.92
  13  -2  -4    3.11    1.04
  13  -2  -3   58.39    2.66
  13  -2  -2    5.53    1.17
  13  -2  -1    0.87    0.72
  13  -2  -1    1.43    0.88
  13  -2   0   -0.94    0.55
  13  -2   0    0.24    0.79
  13  -2   1   12.12    1.33
  13  -2   1   16.33    1.45
  13  -2   2    0.10    0.60
  13  -2   2    0.66    0.77
  13  -2   3    2.62    0.86
  13  -2   4   16.72    1.60
  13  -2   5    3.75    0.99
  13  -2   6   11.79    1.45
  13  -2   7    8.45    1.30
  13  -2   8    4.30    1.17
  13  -2   9   -0.11    0.83
  13  -2  10    0.33    0.92
 -14   2  11    0.59    1.22
 -14   2  11    0.00    1.47
  14  -2 -10    1.79    1.27
 -14   2  10    3.03    1.31
 -14   2  10    0.71    1.42
  14  -2  -9    0.29    1.12
 -14   2   9   -1.39    1.21
  14  -2  -8    0.73    1.08
 -14   2   8    0.46    1.14
  14  -2  -7   -0.88    0.93
 -14   2   7   -0.27    1.04
  14  -2  -6    7.81    1.44
  14  -2  -5    7.56    1.40
  14  -2  -4    7.84    1.35
  14  -2  -3    8.42    1.37
  14  -2  -2    7.47    1.28
  14  -2  -1    1.03    0.91
  14  -2   0    1.78    0.92
  14  -2   0    1.44    0.80
  14  -2   1   20.33    1.72
  14  -2   1   19.64    1.66
  14  -2   2    0.78    0.78
  14  -2   2    0.63    0.69
  14  -2   3    2.16    0.78
  14  -2   4    0.15    0.70
  14  -2   5    3.14    0.93
  14  -2   6    0.94    0.83
  14  -2   7    0.53    0.78
  14  -2   8    2.64    1.04
  14  -2   9    2.92    1.07
  15  -2 -10   -0.24    1.19
 -15   2  10   -1.72    1.33
 -15   2  10    2.52    1.38
  15  -2  -9    3.18    1.37
 -15   2   9    2.50    1.44
  15  -2  -8   -1.15    1.02
 -15   2   8    0.67    1.25
  15  -2  -7    7.68    1.57
  15  -2  -6    0.04    1.02
  15  -2  -5    0.06    0.98
  15  -2  -4    0.11    0.97
  15  -2  -3   -0.12    0.92
  15  -2  -2    2.04    1.02
  15  -2  -1    3.03    1.03
  15  -2   0    1.05    0.77
  15  -2   0    2.40    0.99
  15  -2   1   14.26    1.56
  15  -2   1   16.68    1.67
  15  -2   2   -0.39    0.72
  15  -2   3   21.16    1.91
  15  -2   4   -0.01    0.70
  15  -2   5    0.06    0.76
  15  -2   6    5.08    1.20
  15  -2   7    6.91    1.36
  15  -2   8    0.73    0.91
  16  -2  -9    4.36    1.50
 -16   2   9    8.39    1.65
 -16   2   9    5.80    1.61
  16  -2  -8   -1.29    1.08
 -16   2   8    0.95    1.30
  16  -2  -7   -0.74    1.06
  16  -2  -6    0.64    1.11
  16  -2  -5   10.62    1.70
  16  -2  -4    1.70    1.08
  16  -2  -3    0.28    0.98
  16  -2  -2    4.40    1.20
  16  -2  -1   15.16    1.70
  16  -2   0   16.56    1.73
  16  -2   0   14.54    1.59
  16  -2   1    1.74    0.91
  16  -2   2    0.67    0.87
  16  -2   3   -0.35    0.74
  16  -2   4    0.37    0.82
  16  -2   5    1.93    0.91
  16  -2   6    1.25    0.85
  17  -2  -7   -0.52    1.20
 -17   2   7    1.71    1.24
  17  -2  -6    1.42    1.24
  17  -2  -5    1.75    1.21
  17  -2  -4   -0.62    1.03
  17  -2  -3    7.97    1.51
  17  -2  -2    0.38    1.03
  17  -2  -1    6.02    1.36
  17  -2   1    8.40    1.38
  17  -2   2   -0.42    0.81
  17  -2   3    0.61    0.91
  17  -2   4    2.04    0.97
  18  -2  -4   -1.38    0.99
  18  -2  -3    2.08    1.21
  18  -2  -2    1.45    1.11
  18  -2  -1    2.73    1.14
  18   3   0    1.11    1.00
  18   3  -1    2.38    1.13
  18   3  -2    7.29    1.47
  18   3  -3    3.79    1.26
  17   3   4    0.72    0.88
  17   3   3    6.00    1.26
  17   3   2    1.23    0.89
  17   3   1    1.55    1.04
  17   3   0    1.79    1.00
  17   3  -1    1.25    1.00
  17   3  -2    4.17    1.23
  17   3  -3    4.04    1.26
  17   3  -4    6.79    1.45
  17   3  -5    1.35    1.13
  17   3  -6    6.66    1.50
  17   3  -7    1.62    1.18
  16   3   6    8.22    1.41
  16   3   5   -0.20    0.83
  16   3   4    2.61    1.01
  16   3   3    1.37    0.88
  16   3   2    9.94    1.43
  16   3   2    8.50    1.39
  16   3   1    0.99    0.97
  16   3   1    1.60    0.92
  16   3   0   -0.54    0.83
  16   3  -1    0.92    0.97
  16   3  -2    1.47    1.02
  16   3  -3    0.29    0.91
  16   3  -4   -0.12    0.97
  16   3  -5    0.71    1.07
  16   3  -6    3.57    1.27
  16   3  -7    2.83    1.23
 -16  -3   8   13.53    2.07
  16   3  -8   12.32    1.78
  16   3  -9    4.32    1.37
  15   3   7    6.09    1.30
  15   3   6    8.02    1.36
  15   3   5   10.06    1.43
  15   3   4    2.07    0.95
  15   3   3    3.41    1.00
  15   3   3    3.09    1.01
  15   3   2    0.17    0.75
  15   3   2    0.47    0.84
  15   3   1    1.54    0.93
  15   3   1    1.77    0.88
  15   3   0   15.31    1.64
  15   3  -1    0.61    0.90
  15   3  -2    1.32    0.93
  15   3  -3    0.13    0.89
  15   3  -4    7.06    1.33
  15   3  -5    1.88    1.06
  15   3  -6    5.54    1.31
  15   3  -7   -0.70    0.87
 -15  -3   8   -0.28    1.28
  15   3  -8    0.55    1.01
 -15  -3   9    2.78    1.55
  15   3  -9    1.51    1.12
 -15  -3  10    4.32    1.69
  15   3 -10    5.12    1.40
  14   3   9   -0.01    0.88
  14   3   8    3.14    1.10
  14   3   7    1.35    0.91
  14   3   6    5.25    1.16
  14   3   5    1.99    0.92
  14   3   4    9.08    1.31
  14   3   3    4.70    1.10
  14   3   3    4.46    1.05
  14   3   2   21.98    1.84
  14   3   2   18.82    1.68
  14   3   1   -0.17    0.70
  14   3   1   -0.29    0.76
  14   3   0    4.43    1.09
  14   3   0    3.86    0.99
  14   3  -1    4.55    1.09
  14   3  -2    1.14    0.92
  14   3  -3    1.81    0.97
  14   3  -4    0.39    0.87
  14   3  -5    2.09    1.00
  14   3  -6    6.81    1.33
  14   3  -7    2.09    1.04
 -14  -3   8    7.57    1.65
  14   3  -8    8.78    1.49
 -14  -3   9    4.14    1.61
  14   3  -9    5.16    1.31
 -14  -3  10    3.27    1.63
  14   3 -10    4.29    1.32
 -14  -3  11    1.78    1.58
  14   3 -11    1.82    1.17
  13   3  10    4.55    1.22
  13   3   9   -0.16    0.80
  13   3   8   11.70    1.57
  13   3   7    1.76    0.92
  13   3   6   -0.28    0.68
  13   3   5   -0.35    0.65
  13   3   4    4.89    1.02
  13   3   4    4.97    1.07
  13   3   3    1.11    0.70
  13   3   3    1.99    0.84
  13   3   2    1.25    0.81
  13   3   2    1.93    0.77
  13   3   1    2.23    0.92
  13   3   1    1.74    0.79
  13   3   0   16.66    1.59
  13   3   0   17.47    1.59
  13   3  -1    5.66    1.13
  13   3  -2   16.37    1.65
  13   3  -3    9.81    1.37
  13   3  -4   35.52    2.14
  13   3  -5    0.81    0.86
  13   3  -6    2.12    0.96
  13   3  -7    1.84    0.97
 -13  -3   8    1.39    1.21
  13   3  -8    0.98    0.96
 -13  -3   9    7.15    1.61
  13   3  -9    6.92    1.34
 -13  -3  10    4.73    1.63
  13   3 -10    7.52    1.44
 -13  -3  11    0.59    1.53
  13   3 -11    1.79    1.13
 -13  -3  12    2.60    1.68
  13   3 -12    4.72    1.42
  12   3  11    3.33    1.16
  12   3  10   -0.88    0.83
  12   3   9    0.59    0.85
  12   3   8    2.25    0.92
  12   3   7    0.47    0.73
  12   3   6    1.62    0.81
  12   3   5   -0.31    0.64
  12   3   5    0.53    0.70
  12   3   4    1.29    0.72
  12   3   4    1.97    0.78
  12   3   3    6.55    1.05
  12   3   3    6.57    1.04
  12   3   2   11.48    1.28
  12   3   2   13.38    1.34
  12   3   1    5.37    0.96
  12   3   1    5.08    1.00
  12   3   0   -0.03    0.58
  12   3   0    0.78    0.74
  12   3  -1    1.31    0.82
  12   3  -2   28.06    1.82
  12   3  -3   23.33    1.80
  12   3  -4    2.85    0.96
  12   3  -5    6.26    1.17
  12   3  -6    2.90    1.01
 -12  -3   7    0.43    1.10
  12   3  -7    2.06    0.95
 -12  -3   8    1.88    1.19
  12   3  -8    2.16    0.99
 -12  -3   9    1.56    1.28
  12   3  -9    3.16    1.04
 -12  -3  10    8.51    1.74
  12   3 -10    8.07    1.43
 -12  -3  11    4.06    1.72
  12   3 -11    7.41    1.44
 -12  -3  12    0.72    1.55
  12   3 -12    4.78    1.33
 -12  -3  13    2.94    1.29
 -12  -3  13   -0.22    1.64
  12   3 -13    0.22    1.11
  11   3  12    0.98    1.04
  11   3  11    2.22    1.07
  11   3  10   23.31    2.12
  11   3   9   -0.01    0.75
  11   3   8   12.92    1.52
  11   3   7    0.55    0.72
  11   3   6    9.95    1.29
  11   3   5    5.43    0.94
  11   3   5    3.14    0.87
  11   3   4   13.74    1.32
  11   3   4   10.89    1.23
  11   3   3    1.79    0.68
  11   3   3    0.71    0.68
  11   3   2    8.13    1.07
  11   3   2    7.80    1.06
  11   3   1   17.00    1.47
  11   3   1   17.13    1.49
  11   3   0   15.92    1.47
  11   3   0   14.65    1.44
  11   3  -1   14.14    1.40
  11   3  -1   14.89    1.45
  11   3  -2    7.30    1.11
  11   3  -3   23.15    1.69
  11   3  -4    6.76    1.13
  11   3  -5    2.11    0.89
  11   3  -6   25.10    1.80
 -11  -3   7    0.26    1.02
  11   3  -7    1.81    0.89
 -11  -3   8    3.57    1.26
  11   3  -8    4.98    1.12
 -11  -3   9   -0.49    1.17
  11   3  -9    1.05    0.90
 -11  -3  10   13.64    1.91
  11   3 -10   11.58    1.55
 -11  -3  11   -2.14    1.24
  11   3 -11    0.43    0.93
 -11  -3  12   -1.09    1.45
  11   3 -12   -1.05    0.97
 -11  -3  13    2.80    1.28
 -11  -3  13   -0.40    1.55
  11   3 -13   -0.08    1.09
  10   3  12    1.11    1.00
  10   3  11    1.45    0.98
  10   3  10    1.07    0.89
  10   3   9    1.52    0.83
  10   3   8    5.79    1.11
  10   3   7    2.65    0.85
  10   3   6   15.33    1.54
  10   3   6   18.04    1.45
  10   3   5    5.58    0.92
  10   3   5    6.25    0.93
  10   3   4    0.48    0.64
  10   3   4    1.66    0.64
  10   3   3    0.09    0.62
  10   3   3   -0.13    0.53
  10   3   2    2.54    0.78
  10   3   2    1.33    0.62
  10   3   1   32.02    1.71
  10   3   1   33.58    1.86
  10   3   0    3.39    0.83
  10   3   0    4.62    0.83
  10   3  -1   22.01    1.61
  10   3  -1   23.82    1.56
  10   3  -2   16.12    1.48
  10   3  -3   29.24    1.76
  10   3  -4    3.29    0.90
  10   3  -5   27.68    1.77
  10   3  -6   15.64    1.50
 -10  -3   7    2.56    1.11
  10   3  -7    3.32    0.96
 -10  -3   8   15.92    1.76
  10   3  -8   18.28    1.63
 -10  -3   9    2.64    1.31
  10   3  -9    3.24    1.01
 -10  -3  10    0.36    1.26
  10   3 -10    0.96    0.90
 -10  -3  11    1.26    1.33
  10   3 -11    1.10    0.94
 -10  -3  12    6.37    1.79
  10   3 -12    6.87    1.38
 -10  -3  13    0.60    1.56
 -10  -3  13    4.34    1.28
  10   3 -13    0.46    1.15
 -10  -3  14    2.49    1.25
 -10  -3  14   -0.32    1.57
   9   3  13   -0.15    0.97
   9   3  12   -0.61    0.86
   9   3  11    0.55    0.91
   9   3  10   30.58    2.23
   9   3   9    1.61    0.85
   9   3   8    0.64    0.73
   9   3   7    0.30    0.63
   9   3   6   17.34    1.39
   9   3   6   17.49    1.55
   9   3   5    0.64    0.61
   9   3   5    0.42    0.63
   9   3   4   13.33    1.30
   9   3   4   14.97    1.36
   9   3   3    4.63    0.83
   9   3   3    4.22    0.81
   9   3   2   11.44    1.14
   9   3   2   15.05    1.29
   9   3   1    0.87    0.64
   9   3   1    1.04    0.56
   9   3   0    0.66    0.53
   9   3   0   -0.09    0.59
   9   3  -1    2.69    0.67
   9   3  -1    2.71    0.74
   9   3  -2   31.64    1.71
   9   3  -3   10.66    1.19
   9   3  -4   39.72    1.93
   9   3  -5    2.46    0.86
   9   3  -6   88.47    2.99
  -9  -3   7   36.56    2.30
   9   3  -7   33.21    1.93
  -9  -3   8    0.67    1.06
   9   3  -8    2.36    0.85
  -9  -3   9    0.14    1.11
   9   3  -9    0.02    0.72
  -9  -3  10    3.56    1.38
   9   3 -10    5.68    1.13
  -9  -3  11    0.16    1.26
   9   3 -11    0.70    0.88
  -9  -3  12    0.22    1.36
   9   3 -12    0.32    1.03
  -9  -3  13   10.01    1.48
  -9  -3  13    2.23    1.53
  -9  -3  14    3.39    1.72
  -9  -3  14    5.86    1.33
   8   3  13    0.05    0.92
   8   3  12    1.47    1.01
   8   3  11    0.53    0.94
   8   3  10   -0.59    0.71
   8   3   9    0.55    0.74
   8   3   8    9.02    1.25
   8   3   7   17.89    1.39
   8   3   7   20.05    1.58
   8   3   6   97.32    2.78
   8   3   6   99.68    3.24
   8   3   5    7.64    1.00
   8   3   5    9.78    1.01
   8   3   4   48.64    1.86
   8   3   4   48.53    2.11
   8   3   3    2.83    0.70
   8   3   3    2.37    0.63
   8   3   2   50.48    1.89
   8   3   2   48.34    1.96
   8   3   1   19.52    1.27
   8   3   1   18.07    1.29
   8   3   0    0.22    0.53
   8   3   0   -0.55    0.38
   8   3  -1    0.08    0.53
   8   3  -1    0.09    0.44
   8   3  -2    0.55    0.58
   8   3  -3   22.84    1.48
   8   3  -4    9.89    1.08
   8   3  -5    2.31    0.78
  -8  -3   6    6.55    1.22
   8   3  -6    6.47    1.03
  -8  -3   7   26.26    2.25
   8   3  -7   24.57    1.69
  -8  -3   8   20.08    2.03
   8   3  -8   19.65    1.52
  -8  -3   9    4.31    1.30
   8   3  -9    5.15    1.01
  -8  -3  10    0.51    1.16
   8   3 -10    0.19    0.77
  -8  -3  11    3.41    1.37
   8   3 -11    2.08    0.94
  -8  -3  12   10.53    1.39
  -8  -3  12    6.98    1.60
   8   3 -12    7.26    1.34
  -8  -3  13    6.90    1.68
  -8  -3  13    6.40    1.28
  -8  -3  14    0.81    1.50
  -8  -3  15   10.63    1.99
   7   3  14   10.08    1.65
   7   3  13    9.56    1.55
   7   3  12   -0.24    0.84
   7   3  11    1.85    0.86
   7   3  10    9.36    1.32
   7   3   9    0.89    0.73
   7   3   8    6.10    1.04
   7   3   7   26.58    1.76
   7   3   7   25.98    1.51
   7   3   6   15.77    1.29
   7   3   6   12.03    1.22
   7   3   5   33.73    1.79
   7   3   5   34.36    1.55
   7   3   4   47.81    1.81
   7   3   4   49.12    2.01
   7   3   3   32.69    1.47
   7   3   3   31.59    1.58
   7   3   2    0.12    0.48
   7   3   2   -0.18    0.38
   7   3   1    3.91    0.67
   7   3   1    3.61    0.62
   7   3   0   29.40    1.40
   7   3   0   31.28    1.42
   7   3  -1   74.50    2.24
   7   3  -1   70.08    2.21
   7   3  -2    5.32    0.76
   7   3  -3   12.06    1.14
   7   3  -4   92.77    2.74
   7   3  -5   10.96    1.10
  -7  -3   6   33.24    2.23
   7   3  -6   33.68    1.71
  -7  -3   7    3.00    1.13
   7   3  -7    2.24    0.79
  -7  -3   8   53.80    2.73
   7   3  -8   52.40    2.20
  -7  -3   9    3.46    1.16
   7   3  -9    4.76    0.95
  -7  -3  10    4.00    1.29
   7   3 -10    4.79    1.00
  -7  -3  11    5.27    1.41
   7   3 -11    4.03    1.05
  -7  -3  12    2.45    1.31
  -7  -3  12    5.62    1.20
   7   3 -12    5.60    1.19
  -7  -3  13    1.21    0.97
  -7  -3  13   -0.78    1.19
  -7  -3  14    0.75    1.39
  -7  -3  15   -2.35    1.24
   6   3  14    0.96    1.06
   6   3  13    3.72    1.23
   6   3  12    8.99    1.41
   6   3  11    3.65    1.01
   6   3  10    3.48    0.99
   6   3   9    0.37    0.70
   6   3   8    6.34    1.02
   6   3   8    9.70    1.02
   6   3   7    0.22    0.65
   6   3   7    0.20    0.58
   6   3   6   13.19    1.19
   6   3   6   14.17    1.37
   6   3   5  116.78    3.26
   6   3   5  118.63    2.95
   6   3   4   20.89    1.28
   6   3   4   21.52    1.25
   6   3   3   20.14    1.24
   6   3   3   20.61    1.19
   6   3   2   25.33    1.19
   6   3   2   25.11    1.25
   6   3   1   27.18    1.32
   6   3   1   27.24    1.24
   6   3   0   11.35    0.97
   6   3   0   12.80    0.97
   6   3  -1    3.11    0.53
   6   3  -1    3.97    0.63
   6   3  -2   20.76    1.19
   6   3  -3   17.22    1.14
   6   3  -4    0.26    0.50
  -6  -3   5   13.51    1.25
   6   3  -5   12.03    1.09
  -6  -3   6   35.06    2.15
   6   3  -6   33.07    1.60
  -6  -3   7    1.30    0.99
   6   3  -7    0.27    0.64
  -6  -3   8   25.72    2.22
   6   3  -8   25.30    1.61
  -6  -3   9    7.56    1.36
   6   3  -9    7.11    1.03
  -6  -3  10    3.76    1.21
   6   3 -10    4.16    0.94
  -6  -3  11    0.94    1.11
   6   3 -11   -0.92    0.72
  -6  -3  12   19.42    1.71
  -6  -3  12   10.99    1.68
  -6  -3  13   -0.32    1.18
  -6  -3  14    2.01    1.40
  -6  -3  15   -1.19    1.28
   5   3  15   -0.55    0.94
   5   3  14    8.27    1.52
   5   3  13    1.07    0.96
   5   3  12    7.26    1.31
   5   3  11    1.81    0.86
   5   3  10    2.77    0.90
   5   3   9    3.10    0.86
   5   3   8    7.54    1.06
   5   3   8    8.26    1.04
   5   3   7    5.97    0.89
   5   3   7    5.80    0.92
   5   3   6    0.31    0.50
   5   3   6   -0.14    0.60
   5   3   5    1.61    0.54
   5   3   5    0.95    0.57
   5   3   4  345.59    6.84
   5   3   4  344.67    6.57
   5   3   3   21.23    1.13
   5   3   3   23.26    1.13
   5   3   2  139.84    3.10
   5   3   2  139.57    3.23
   5   3   1    8.11    0.72
   5   3   1    6.36    0.62
   5   3   0  186.18    3.96
   5   3   0  192.63    3.98
   5   3  -1    2.78    0.51
   5   3  -1    2.19    0.44
   5   3  -2   22.90    1.14
   5   3  -3  209.18    4.40
   5   3  -4    0.02    0.44
  -5  -3   5    3.96    0.80
   5   3  -5    2.80    0.62
  -5  -3   6    9.63    1.14
   5   3  -6    9.24    0.93
  -5  -3   7    5.63    1.10
   5   3  -7    7.20    0.93
  -5  -3   8   22.30    2.02
   5   3  -8   22.01    1.46
  -5  -3   9   34.41    2.41
   5   3  -9   34.11    1.75
  -5  -3  10   30.33    2.25
   5   3 -10   28.47    1.69
  -5  -3  11    8.22    1.41
  -5  -3  11    9.13    1.15
   5   3 -11    7.50    1.16
  -5  -3  12    0.36    0.79
  -5  -3  12   -1.29    1.02
  -5  -3  13   -0.36    1.09
  -5  -3  14    4.30    1.42
  -5  -3  15   -0.74    1.27
   4   3  15   -0.96    0.90
   4   3  14    1.01    1.04
   4   3  13    5.27    1.23
   4   3  12   13.25    1.52
   4   3  11    3.20    0.94
   4   3  10    5.12    1.01
   4   3   9    4.18    0.96
   4   3   9    3.00    0.82
   4   3   8   18.49    1.57
   4   3   8   19.25    1.62
   4   3   7    4.88    0.83
   4   3   7    6.59    0.93
   4   3   6   22.63    1.36
   4   3   6   20.49    1.33
   4   3   5   33.22    1.52
   4   3   5   35.05    1.47
   4   3   4    0.91    0.41
   4   3   4    0.60    0.51
   4   3   3   33.39    1.30
   4   3   3   34.46    1.30
   4   3   2   33.82    1.25
   4   3   2   36.14    1.30
   4   3   1   86.68    2.12
   4   3   1   91.38    2.20
   4   3   0   55.31    1.58
   4   3   0   55.57    1.60
   4   3  -1   11.04    0.81
   4   3  -2   49.80    1.53
   4   3  -3  197.37    4.07
  -4  -3   4   26.88    1.48
   4   3  -4   25.52    1.20
  -4  -3   5   14.87    1.43
   4   3  -5   12.24    0.92
  -4  -3   6   18.92    1.59
   4   3  -6   20.20    1.14
  -4  -3   7    6.00    1.06
   4   3  -7    7.71    0.88
  -4  -3   8   67.88    2.85
   4   3  -8   67.14    2.26
  -4  -3   9    4.20    1.14
   4   3  -9    3.13    0.82
  -4  -3  10   12.52    1.46
   4   3 -10   15.63    1.40
  -4  -3  11    3.67    0.88
  -4  -3  11    1.09    1.00
  -4  -3  12   23.03    2.21
  -4  -3  13    1.78    1.14
  -4  -3  14    1.03    1.26
  -4  -3  15   -1.25    1.15
  -4  -3  16    0.06    1.32
   3   3  15   -0.90    0.93
   3   3  14    7.69    1.41
   3   3  13    3.80    1.15
   3   3  12    3.98    1.05
   3   3  11   -0.05    0.71
   3   3  10   61.63    2.58
   3   3  10   57.80    2.35
   3   3   9   29.93    1.86
   3   3   9   29.57    1.87
   3   3   8   22.45    1.61
   3   3   8   21.87    1.68
   3   3   7    1.38    0.76
   3   3   7    0.80    0.58
   3   3   6   18.32    1.33
   3   3   6   19.48    1.28
   3   3   5    1.10    0.57
   3   3   5    0.30    0.40
   3   3   4    4.08    0.55
   3   3   4    4.58    0.64
   3   3   3    0.87    0.44
   3   3   3    1.05    0.34
   3   3   2  474.61    8.44
   3   3   2  468.51    8.40
   3   3   1   21.92    0.93
   3   3   1   24.04    0.97
   3   3   0   11.08    0.77
   3   3   0   10.21    0.76
   3   3  -1    1.34    0.39
   3   3  -2   35.41    1.19
  -3  -3   3   13.58    0.55
  -3  -3   3   13.15    1.03
   3   3  -3   12.74    0.79
  -3  -3   4    0.36    0.49
  -3  -3   4    0.05    0.15
   3   3  -4   -0.04    0.33
  -3  -3   5    0.46    0.18
  -3  -3   5    0.65    0.58
   3   3  -5    0.83    0.42
  -3  -3   6  154.55    2.76
  -3  -3   6  160.74    3.86
   3   3  -6  158.52    3.50
  -3  -3   7    2.38    0.85
   3   3  -7    2.43    0.60
  -3  -3   8    9.82    1.21
   3   3  -8   10.10    0.97
  -3  -3   9   -0.40    0.89
   3   3  -9    0.01    0.62
  -3  -3  10    5.07    0.85
  -3  -3  10    6.21    1.15
  -3  -3  11    3.30    0.84
  -3  -3  11    2.69    1.01
  -3  -3  12   -0.40    0.93
  -3  -3  13    1.27    1.11
  -3  -3  14   11.39    1.71
  -3  -3  15    0.50    1.21
  -3  -3  16    1.35    1.37
   2   3  15   -2.35    0.85
   2   3  14    0.27    0.98
   2   3  13   -0.28    0.87
   2   3  12    6.72    1.17
   2   3  11    0.42    0.76
   2   3  10    2.37    0.95
   2   3  10    1.75    0.81
   2   3   9    3.13    0.98
   2   3   9    1.79    0.74
   2   3   8   41.72    1.95
   2   3   8   42.01    1.97
   2   3   7    2.00    0.77
   2   3   7    0.66    0.56
   2   3   6  110.14    2.86
   2   3   6  108.22    2.77
   2   3   5    5.25    0.71
   2   3   5    4.05    0.57
   2   3   4    5.59    0.64
   2   3   4    4.95    0.54
   2   3   3    0.97    0.32
   2   3   3    1.00    0.44
   2   3   2    2.37    0.34
   2   3   2    2.95    0.50
   2   3   1  371.93    6.72
   2   3   1  380.00    6.61
   2   3   0   18.10    0.84
   2   3   0   17.79    0.76
   2   3  -1   15.94    0.79
  -2  -3   2   39.25    1.00
   2   3  -2   39.98    1.19
  -2  -3   3   10.01    0.49
  -2  -3   3   11.42    0.96
   2   3  -3    9.29    0.67
  -2  -3   4    4.09    0.62
  -2  -3   4    3.51    0.28
   2   3  -4    4.69    0.50
  -2  -3   5   45.35    1.79
  -2  -3   5   43.80    1.08
   2   3  -5   44.90    1.38
  -2  -3   6   40.44    1.84
  -2  -3   6   36.43    1.02
   2   3  -6   36.34    1.32
  -2  -3   7   20.47    1.64
  -2  -3   7   16.43    0.78
   2   3  -7   18.19    1.04
  -2  -3   8   23.80    1.87
   2   3  -8   22.72    1.27
  -2  -3   9    3.91    1.00
  -2  -3   9    2.79    0.74
  -2  -3  10    3.83    1.01
  -2  -3  10    5.44    0.82
  -2  -3  11    5.79    1.16
  -2  -3  12   10.69    1.42
  -2  -3  13    6.02    1.29
  -2  -3  14    1.04    1.11
  -2  -3  15   -1.02    1.05
  -2  -3  16   -0.60    1.22
   1   3  16    0.84    1.13
   1   3  15    0.03    1.01
   1   3  14    7.77    1.39
   1   3  13    1.45    0.96
   1   3  12    7.33    1.19
   1   3  11   -1.68    0.88
   1   3  11   -0.34    0.70
   1   3  10   30.30    1.88
   1   3  10   31.70    1.89
   1   3   9   10.90    1.23
   1   3   9    9.94    1.13
   1   3   8    3.10    0.77
   1   3   8    3.00    0.90
   1   3   7   21.66    1.43
   1   3   7   19.15    1.41
   1   3   6   20.63    1.23
   1   3   6   21.49    1.33
   1   3   5   50.12    1.68
   1   3   5   53.26    1.66
   1   3   4   82.91    2.01
   1   3   4   77.90    2.03
   1   3   3   10.58    0.70
   1   3   3   11.16    0.96
   1   3   2   30.77    1.26
   1   3   2   30.40    0.95
   1   3   1   83.01    1.88
   1   3   1   86.32    1.71
   1   3   0  187.28    3.49
  -1  -3   1   91.40    1.76
   1   3  -1   96.77    1.94
  -1  -3   2    6.35    0.55
  -1  -3   2    4.13    0.53
   1   3  -2    4.55    0.41
  -1  -3   3   31.88    1.32
  -1  -3   3   32.99    0.88
   1   3  -3   32.25    0.96
  -1  -3   4  159.29    2.83
  -1  -3   4  160.99    3.47
   1   3  -4  154.84    3.08
  -1  -3   5   58.21    1.92
  -1  -3   5   56.61    1.35
   1   3  -5   55.93    1.46
  -1  -3   6   43.32    1.23
  -1  -3   6   44.11    1.85
   1   3  -6   45.71    1.36
  -1  -3   7   24.61    1.65
  -1  -3   7   25.34    1.02
   1   3  -7   25.40    1.12
  -1  -3   8    0.54    0.72
  -1  -3   8   -0.02    0.52
  -1  -3   9    1.18    0.85
  -1  -3   9    2.23    0.66
  -1  -3  10    0.48    0.76
  -1  -3  10    0.90    0.62
  -1  -3  11    1.14    0.90
  -1  -3  12   10.16    1.39
  -1  -3  13    8.02    1.36
  -1  -3  14   14.55    1.72
  -1  -3  15   -1.14    0.97
  -1  -3  16    5.56    1.53
   0   3  16   -1.28    1.00
   0   3  15    0.28    1.07
   0   3  14    1.53    1.04
   0   3  13    0.17    0.85
   0   3  12    6.82    1.19
   0   3  11   -1.08    0.68
   0   3  11   -1.77    0.88
   0   3  10   -0.69    0.86
   0   3  10   -0.08    0.68
   0   3   9    8.12    1.03
   0   3   9   10.52    1.22
   0   3   8   56.94    2.19
   0   3   8   55.47    2.18
   0   3   7    2.76    0.65
   0   3   7    3.21    0.78
   0   3   6   88.03    2.38
   0   3   6   88.24    2.37
   0   3   5    0.00    0.35
   0   3   5   -0.36    0.48
   0   3   4    1.71    0.50
   0   3   4    0.72    0.33
   0   3   3   49.58    1.29
   0   3   3   46.84    1.46
   0   3   2   18.14    0.67
   0   3   2   18.28    1.02
   0   3   1   -0.23    0.29
   0   3   1    0.12    0.11
   0  -3   0   -0.19    0.17
   0   3   0   -0.23    0.24
   0  -3   1   -0.09    0.16
   0  -3   1   -0.21    0.21
   0   3  -1    0.12    0.22
   0  -3   2   18.21    1.02
   0  -3   2   19.04    0.71
   0   3  -2   17.47    0.63
   0  -3   3   51.73    1.56
   0  -3   3   47.01    1.16
   0   3  -3   46.74    1.09
   0  -3   4    0.39    0.23
   0  -3   4    0.62    0.43
   0   3  -4    0.52    0.24
   0  -3   5    0.88    0.48
   0  -3   5   -0.23    0.23
   0   3  -5    0.04    0.26
   0  -3   6   91.14    2.60
   0  -3   6   87.96    2.04
   0  -3   7    2.58    0.45
   0  -3   7    2.94    0.47
   0  -3   7    1.51    0.67
   0  -3   8   53.79    1.56
   0  -3   8   49.24    2.17
   0  -3   9    7.92    0.78
   0  -3   9    7.82    1.10
   0  -3  10   -0.02    0.72
   0  -3  11    0.96    0.82
   0  -3  12    5.86    1.17
   0  -3  13   -0.19    0.88
   0  -3  14    1.74    1.11
   0  -3  15   -0.11    1.04
   0  -3  16    0.65    1.19
  -1   3  16    4.40    1.39
  -1   3  15   -1.47    0.93
  -1   3  14   15.77    1.73
  -1   3  13   10.23    1.40
  -1   3  12    8.79    1.35
  -1   3  12    9.28    1.27
  -1   3  11    1.35    0.78
  -1   3  11    1.27    1.00
  -1   3  10   -0.53    0.85
  -1   3  10    1.33    0.78
  -1   3   9    2.65    0.82
  -1   3   9    2.05    0.99
  -1   3   8   -0.16    0.81
  -1   3   8    0.32    0.65
  -1   3   7   25.47    1.49
  -1   3   7   23.94    1.46
  -1   3   6   43.62    1.64
  -1   3   5   61.05    1.79
  -1   3   5   59.07    1.75
  -1   3   4  155.34    3.27
  -1   3   4  156.14    3.17
  -1   3   3   34.35    1.10
  -1   3   2    4.92    0.59
   1  -3  -1   89.31    1.71
   1  -3   0  184.06    3.12
   1  -3   0  185.30    3.15
  -1   3   0  182.88    3.35
   1  -3   1   82.47    1.62
   1  -3   1   81.10    1.64
  -1   3  -1   79.90    1.60
   1  -3   2   29.85    0.94
   1  -3   2   31.98    1.08
   1  -3   3   11.97    0.80
   1  -3   3   10.61    0.64
   1  -3   4   80.39    1.82
   1  -3   4   82.18    2.11
   1  -3   5   49.04    1.37
   1  -3   5   50.50    1.70
   1  -3   5   46.26    1.07
   1  -3   6   20.10    1.00
   1  -3   6   20.34    1.33
   1  -3   6   19.87    0.74
   1  -3   7   17.73    1.05
   1  -3   7   20.22    1.45
   1  -3   7   20.74    0.91
   1  -3   8    4.16    0.61
   1  -3   8    3.48    0.81
   1  -3   9   10.93    1.21
   1  -3  10   30.86    1.90
   1  -3  11   -0.62    0.70
   1  -3  12    7.31    1.26
   1  -3  13    1.78    1.00
   1  -3  14    7.59    1.41
   1  -3  15    0.16    1.06
   1  -3  16    0.58    1.11
  -2   3  16    0.72    1.24
  -2   3  15   -0.15    1.04
  -2   3  14   -0.32    1.00
  -2   3  13    3.90    1.11
  -2   3  12   15.29    1.55
  -2   3  12   13.78    1.51
  -2   3  11    4.41    1.03
  -2   3  11    6.13    1.19
  -2   3  10    5.02    1.00
  -2   3  10    4.12    1.04
  -2   3   9    1.91    0.95
  -2   3   9    2.49    0.84
  -2   3   8   21.64    1.58
  -2   3   8   20.66    1.54
  -2   3   7   16.00    1.37
  -2   3   7   19.63    1.43
  -2   3   6   36.13    1.52
  -2   3   6   35.23    1.48
  -2   3   5   45.15    1.56
  -2   3   5   43.74    1.54
  -2   3   4    3.50    0.48
  -2   3   4    2.58    0.54
  -2   3   3    8.99    0.84
  -2   3   3   10.08    0.76
   2  -3  -2   40.61    1.01
  -2   3   2   37.46    1.29
  -2   3   2   37.19    1.11
   2  -3  -1   17.10    0.69
  -2   3   1   15.46    0.87
   2  -3   0   19.06    0.70
   2  -3   0   20.10    0.62
  -2   3   0   18.07    0.79
   2  -3   1  358.61    6.17
   2  -3   1  356.20    5.89
  -2   3  -1  349.65    6.10
   2  -3   2    1.98    0.34
   2  -3   2    1.61    0.31
   2  -3   3    0.95    0.29
   2  -3   3    1.58    0.37
   2  -3   4    4.66    0.46
   2  -3   4    4.77    0.56
   2  -3   5    4.56    0.51
   2  -3   5    5.09    0.67
   2  -3   6  103.31    2.80
   2  -3   6  104.27    2.45
   2  -3   7    0.37    0.58
   2  -3   7    0.92    0.44
   2  -3   8   44.26    2.07
   2  -3   9    1.48    0.78
   2  -3  10    2.85    0.87
   2  -3  11   -0.03    0.75
   2  -3  12    4.70    1.09
   2  -3  13   -0.57    0.80
   2  -3  14   -0.83    0.87
   2  -3  15   -0.50    0.97
  -3   3  16    1.25    1.30
  -3   3  15    0.84    1.18
  -3   3  14   10.06    1.51
  -3   3  13    1.99    1.07
  -3   3  13    2.82    1.23
  -3   3  12   -0.84    0.83
  -3   3  12    0.11    1.06
  -3   3  11    2.59    0.95
  -3   3  11    2.10    1.00
  -3   3  10    6.88    1.13
  -3   3  10    6.31    1.05
  -3   3   9    0.40    0.81
  -3   3   9   -0.12    0.91
  -3   3   8    9.12    1.07
  -3   3   8   12.11    1.20
  -3   3   7    1.14    0.67
  -3   3   7    1.53    0.75
  -3   3   6  160.13    3.63
  -3   3   6  159.10    3.62
  -3   3   5   -0.33    0.53
  -3   3   5    0.60    0.51
   3  -3  -4    0.03    0.20
  -3   3   4    0.21    0.40
  -3   3   4   -0.59    0.41
   3  -3  -3   11.99    0.58
  -3   3   3   12.77    0.88
  -3   3   3   13.74    0.91
   3  -3  -2   33.75    1.15
   3  -3  -2   33.93    0.89
  -3   3   2   30.87    1.17
   3  -3  -1    1.06    0.23
   3  -3  -1    1.28    0.39
   3  -3  -1    1.23    0.27
  -3   3   1    0.50    0.41
   3  -3   0   11.27    0.63
   3  -3   0   11.33    0.66
   3  -3   0   11.26    0.71
  -3   3   0    9.65    0.75
   3  -3   1   23.16    0.84
   3  -3   1   22.20    0.84
   3  -3   1   23.12    0.77
   3  -3   2  450.77    7.57
   3  -3   2  460.83    8.05
  -3   3  -2  449.50    7.69
   3  -3   3    1.20    0.35
   3  -3   3    0.96    0.33
   3  -3   4    4.90    0.58
   3  -3   4    2.48    0.42
   3  -3   5    0.69    0.43
   3  -3   5    0.34    0.34
   3  -3   6   17.99    1.08
   3  -3   6   17.22    1.30
   3  -3   7    0.53    0.49
   3  -3   7    1.33    0.65
   3  -3   8   19.36    1.59
   3  -3   9   28.89    1.87
   3  -3  10   58.16    2.55
   3  -3  11   -0.05    0.70
   3  -3  12    1.99    0.94
   3  -3  13    3.36    1.10
   3  -3  14    8.36    1.42
   3  -3  15   -0.87    0.87
  -4   3  16   -0.86    1.18
  -4   3  15    0.26    1.16
  -4   3  14   -0.31    1.07
  -4   3  13    2.33    1.23
  -4   3  13    1.40    1.10
  -4   3  12   30.58    2.17
  -4   3  12   24.55    2.06
  -4   3  11    1.20    0.94
  -4   3  11    1.51    0.98
  -4   3  10   13.36    1.35
  -4   3  10   20.15    1.71
  -4   3   9    2.58    0.97
  -4   3   9    2.35    1.00
  -4   3   8   68.12    2.38
  -4   3   8   64.60    2.48
  -4   3   7    7.30    0.99
  -4   3   7    7.99    1.02
   4  -3  -6   20.43    0.77
  -4   3   6   21.86    1.36
  -4   3   6   23.79    1.46
   4  -3  -5   11.32    0.58
  -4   3   5   12.37    1.20
  -4   3   5   12.03    1.07
   4  -3  -4   28.12    1.29
   4  -3  -4   26.25    0.75
  -4   3   4   22.09    1.19
  -4   3   4   25.95    1.29
   4  -3  -3  197.16    4.12
   4  -3  -3  196.07    3.38
   4  -3  -2   51.91    1.57
   4  -3  -2   51.44    1.22
   4  -3  -1   10.58    0.63
   4  -3  -1   11.13    0.67
   4  -3  -1   10.91    0.77
   4  -3   0   54.51    1.42
   4  -3   0   53.97    1.37
   4  -3   0   54.76    1.45
   4  -3   1   89.73    2.01
   4  -3   1   91.49    1.99
   4  -3   1   93.92    2.12
   4  -3   2   33.54    1.20
   4  -3   2   32.88    1.16
   4  -3   2   33.47    0.94
   4  -3   3   32.76    1.28
   4  -3   3   32.43    1.24
   4  -3   3   33.13    0.85
   4  -3   4    0.53    0.39
   4  -3   4    0.54    0.35
   4  -3   5   32.79    1.50
   4  -3   5   31.78    1.36
   4  -3   6   20.60    1.39
   4  -3   6   18.84    1.20
   4  -3   7    6.64    0.92
   4  -3   7    5.34    0.73
   4  -3   8   16.70    1.54
   4  -3   9    3.88    0.88
   4  -3  10    4.20    0.95
   4  -3  11    3.43    0.99
   4  -3  12   19.04    1.83
   4  -3  13    6.12    1.23
   4  -3  14    0.83    1.01
   4  -3  15    0.35    1.01
  -5   3  15   -2.54    1.07
  -5   3  14    3.55    1.29
  -5   3  14    5.94    1.49
  -5   3  13   -0.81    1.00
  -5   3  13    0.20    1.11
  -5   3  12   -0.65    0.92
  -5   3  12   -1.20    0.93
  -5   3  11    5.22    1.17
  -5   3  11    7.99    1.28
  -5   3  10   31.30    1.94
  -5   3  10   29.36    2.06
  -5   3   9   31.72    2.15
  -5   3   9   33.32    2.01
  -5   3   8   20.55    1.85
  -5   3   8   21.78    1.72
  -5   3   7    7.14    1.04
  -5   3   7    6.29    1.01
  -5   3   6    7.88    0.98
  -5   3   6    8.70    0.98
   5  -3  -5    3.04    0.70
   5  -3  -5    3.11    0.29
  -5   3   5    2.44    0.67
  -5   3   5    2.75    0.68
   5  -3  -4   -0.25    0.46
   5  -3  -4    0.12    0.20
  -5   3   4    0.21    0.49
   5  -3  -3  209.96    3.64
   5  -3  -3  208.14    4.42
   5  -3  -2   21.65    1.11
   5  -3  -2   22.66    0.83
   5  -3  -1    2.13    0.33
   5  -3  -1    2.66    0.51
   5  -3  -1    2.22    0.36
   5  -3   0  182.97    3.72
   5  -3   0  185.35    3.50
   5  -3   0  184.57    3.72
   5  -3   1    7.51    0.67
   5  -3   1    6.17    0.54
   5  -3   1    7.55    0.74
   5  -3   2  139.88    3.12
   5  -3   2  138.06    2.80
   5  -3   2  137.84    2.96
   5  -3   3   21.90    1.13
   5  -3   3   19.89    1.07
   5  -3   3   21.08    0.78
   5  -3   4  336.62    6.72
   5  -3   4  345.08    6.30
   5  -3   5    1.10    0.45
   5  -3   5    1.46    0.54
   5  -3   6   -0.33    0.46
   5  -3   6   -0.06    0.50
   5  -3   7    5.02    0.89
   5  -3   7    6.00    0.81
   5  -3   8    6.59    1.01
   5  -3   9    3.49    0.88
   5  -3  10    2.65    0.87
   5  -3  11    0.25    0.76
   5  -3  12    6.86    1.26
   5  -3  13    0.82    0.92
   5  -3  14   10.22    1.69
   5  -3  15    0.17    1.01
  -6   3  15   -1.04    1.15
  -6   3  14    0.32    1.19
  -6   3  14    3.68    1.39
  -6   3  13   -0.98    1.03
  -6   3  13   -0.14    1.05
  -6   3  12   15.47    1.60
  -6   3  12   11.62    1.52
  -6   3  11    0.78    0.98
  -6   3  11   -1.32    0.95
  -6   3  10    2.22    1.00
  -6   3  10    2.70    1.07
  -6   3   9    9.63    1.25
  -6   3   9    6.37    1.20
  -6   3   8   25.30    2.01
  -6   3   8   21.90    1.71
  -6   3   7   -0.59    0.79
  -6   3   7    0.66    0.90
   6  -3  -6   35.92    1.79
  -6   3   6   32.19    1.91
  -6   3   6   31.31    1.72
   6  -3  -5   13.40    1.25
   6  -3  -5   14.73    0.62
  -6   3   5   14.70    1.39
   6  -3  -4    0.27    0.22
   6  -3  -4    0.51    0.56
   6  -3  -3   18.76    1.24
   6  -3  -3   16.70    0.77
   6  -3  -2   21.32    1.19
   6  -3  -2   22.20    0.91
   6  -3  -1    3.47    0.42
   6  -3  -1    3.45    0.48
   6  -3  -1    3.71    0.60
   6  -3   0   14.32    0.85
   6  -3   0   12.11    0.85
   6  -3   0   13.31    0.91
   6  -3   1   26.54    1.21
   6  -3   1   25.94    1.11
   6  -3   1   26.03    1.10
   6  -3   2   26.70    1.05
   6  -3   2   27.29    1.23
   6  -3   2   25.73    1.23
   6  -3   3   21.19    1.21
   6  -3   3   19.84    1.14
   6  -3   3   20.96    0.91
   6  -3   4   18.93    1.28
   6  -3   4   20.31    1.17
   6  -3   4   20.55    0.81
   6  -3   5  113.06    2.93
   6  -3   5  112.25    3.13
   6  -3   6   13.50    1.35
   6  -3   6   10.97    1.00
   6  -3   7    1.03    0.65
   6  -3   8    5.99    0.98
   6  -3   9    0.67    0.68
   6  -3  10    4.12    0.99
   6  -3  11    2.97    0.97
   6  -3  12    8.34    1.34
   6  -3  13    1.36    0.98
   6  -3  14    0.14    0.92
  -7   3  15   -1.91    1.16
  -7   3  15    3.42    1.46
  -7   3  14   -0.68    1.17
  -7   3  14    1.16    1.22
  -7   3  13   -1.68    1.02
  -7   3  13   -0.28    1.07
  -7   3  12    6.34    1.27
  -7   3  12    3.29    1.26
  -7   3  11    4.72    1.18
  -7   3  11    4.44    1.26
  -7   3  10    3.94    1.13
  -7   3  10    2.94    1.13
  -7   3   9    3.16    0.95
  -7   3   9    3.85    1.14
  -7   3   8   55.55    2.64
  -7   3   8   59.20    2.46
   7  -3  -7    2.03    0.89
  -7   3   7    2.56    1.02
  -7   3   7    1.77    0.93
   7  -3  -6   37.86    1.94
  -7   3   6   35.95    2.07
   7  -3  -5   11.18    1.18
  -7   3   5    9.65    1.06
   7  -3  -4   95.02    2.80
   7  -3  -4   94.31    1.97
   7  -3  -3   14.40    1.19
   7  -3  -3   12.97    0.77
   7  -3  -2    5.96    0.53
   7  -3  -2    6.53    0.82
   7  -3  -1   75.34    2.09
   7  -3  -1   73.70    1.89
   7  -3  -1   70.63    2.15
   7  -3   0   30.76    1.33
   7  -3   0   32.41    1.26
   7  -3   0   31.96    1.36
   7  -3   1    3.31    0.56
   7  -3   1    3.52    0.55
   7  -3   1    2.77    0.56
   7  -3   2   -0.11    0.37
   7  -3   2    0.12    0.41
   7  -3   2    0.07    0.38
   7  -3   3   29.00    1.42
   7  -3   3   33.50    1.22
   7  -3   3   31.98    1.51
   7  -3   4   44.91    1.76
   7  -3   4   42.64    1.33
   7  -3   4   44.89    1.88
   7  -3   5   33.70    1.08
   7  -3   5   34.57    1.74
   7  -3   5   30.86    1.58
   7  -3   6   12.95    1.24
   7  -3   7   24.17    1.71
   7  -3   8    4.50    0.95
   7  -3   9   -0.35    0.65
   7  -3  10    9.02    1.31
   7  -3  11    1.15    0.90
   7  -3  12    1.10    0.95
   7  -3  13    7.85    1.47
   7  -3  14    8.65    1.52
  -8   3  15   14.72    1.98
  -8   3  15    8.77    1.81
  -8   3  14    3.86    1.43
  -8   3  14    0.72    1.35
  -8   3  13    6.16    1.43
  -8   3  13    0.97    1.32
  -8   3  12    6.78    1.47
  -8   3  12    9.42    1.44
  -8   3  11    4.50    1.21
  -8   3  11    3.57    1.25
  -8   3  10    0.32    1.08
  -8   3  10    0.32    0.93
  -8   3   9    5.38    1.16
  -8   3   9    2.85    1.12
   8  -3  -8   17.09    1.62
  -8   3   8   15.41    1.49
  -8   3   8   17.13    1.61
   8  -3  -7   22.48    1.74
  -8   3   7   23.14    2.06
   8  -3  -6    6.91    1.12
  -8   3   6    6.39    1.08
   8  -3  -5    2.27    0.34
   8  -3  -5    1.61    0.83
   8  -3  -4   10.26    1.15
   8  -3  -4   10.92    0.75
   8  -3  -3   23.45    1.04
   8  -3  -3   24.13    1.56
   8  -3  -2    0.03    0.58
   8  -3  -2    0.51    0.37
   8  -3  -1    0.09    0.36
   8  -3  -1   -0.31    0.57
   8  -3  -1   -0.03    0.39
   8  -3   0   -0.10    0.38
   8  -3   0    0.28    0.55
   8  -3   0    0.06    0.37
   8  -3   1   18.85    1.15
   8  -3   1   17.81    1.16
   8  -3   1   17.35    1.25
   8  -3   2   52.39    1.95
   8  -3   2   51.02    1.71
   8  -3   2   53.96    1.88
   8  -3   3    1.74    0.56
   8  -3   3    2.71    0.65
   8  -3   3    1.04    0.54
   8  -3   4   46.76    1.99
   8  -3   4   46.38    1.90
   8  -3   4   46.11    1.51
   8  -3   5    8.19    0.95
   8  -3   5    9.04    1.06
   8  -3   6   95.02    3.13
   8  -3   7   19.21    1.61
   8  -3   8    9.40    1.22
   8  -3   9    0.59    0.74
   8  -3  10   -0.15    0.73
   8  -3  11    2.05    0.94
   8  -3  12   -0.15    0.82
   8  -3  13    0.36    0.92
  -9   3  14    2.42    1.50
  -9   3  14    4.48    1.44
  -9   3  13    1.19    1.39
  -9   3  13    7.48    1.49
  -9   3  12    3.03    1.23
  -9   3  12    0.42    1.24
  -9   3  11    0.11    1.16
  -9   3  11   -0.07    1.00
  -9   3  10    7.88    1.34
  -9   3  10    5.40    1.37
  -9   3   9   -0.72    0.97
  -9   3   9   -0.19    0.92
   9  -3  -8    2.05    0.97
  -9   3   8    1.43    1.01
  -9   3   8    3.83    1.05
   9  -3  -7   34.80    2.05
  -9   3   7   34.76    2.22
   9  -3  -6   94.55    3.18
  -9   3   6   96.38    3.15
   9  -3  -5    4.08    1.00
   9  -3  -4   34.66    1.92
   9  -3  -4   39.68    1.27
   9  -3  -3   10.79    0.91
   9  -3  -3   11.71    1.23
   9  -3  -2   31.55    1.68
   9  -3  -2   29.81    1.29
   9  -3  -1    2.71    0.77
   9  -3  -1    2.62    0.53
   9  -3  -1    2.30    0.60
   9  -3   0   -0.19    0.44
   9  -3   0   -1.24    0.55
   9  -3   0   -0.12    0.43
   9  -3   1    1.71    0.64
   9  -3   1    0.97    0.51
   9  -3   1    0.59    0.50
   9  -3   2   12.28    1.08
   9  -3   2   11.18    1.01
   9  -3   2   13.77    1.23
   9  -3   3    6.30    0.78
   9  -3   3    4.39    0.79
   9  -3   3    4.39    0.80
   9  -3   4   14.27    1.04
   9  -3   4   14.29    1.35
   9  -3   5    1.42    0.63
   9  -3   6   17.49    1.54
   9  -3   7    0.50    0.63
   9  -3   8   -0.89    0.62
   9  -3   9    1.11    0.80
   9  -3  10   32.31    2.25
   9  -3  11    0.82    0.90
   9  -3  12    0.45    0.94
   9  -3  13   -0.53    0.87
 -10   3  14   -2.31    1.31
 -10   3  14    4.48    1.45
 -10   3  13    0.75    1.40
 -10   3  13    5.51    1.44
 -10   3  12    4.80    1.51
 -10   3  12    7.79    1.52
 -10   3  11   -1.50    1.14
 -10   3  11    0.31    1.04
 -10   3  10    0.09    0.98
 -10   3  10   -1.37    1.04
 -10   3   9    2.91    1.20
 -10   3   9    4.85    1.19
  10  -3  -8   13.51    1.56
 -10   3   8   17.91    1.69
 -10   3   8   18.80    1.80
  10  -3  -7    3.21    1.06
 -10   3   7    1.91    0.98
  10  -3  -6   15.82    1.59
  10  -3  -5   27.20    1.85
  10  -3  -4    1.78    0.90
  10  -3  -3   30.36    1.83
  10  -3  -2   16.07    1.14
  10  -3  -2   16.68    1.46
  10  -3  -1   24.40    1.55
  10  -3  -1   23.23    1.34
  10  -3  -1   26.98    1.65
  10  -3   0    4.58    0.91
  10  -3   0    3.86    0.74
  10  -3   0    4.36    0.70
  10  -3   1   34.64    1.74
  10  -3   1   29.49    1.63
  10  -3   1   33.41    1.66
  10  -3   2    2.66    0.72
  10  -3   2    1.55    0.63
  10  -3   3   -0.29    0.47
  10  -3   3    0.80    0.60
  10  -3   4    1.03    0.63
  10  -3   5    5.86    0.96
  10  -3   6   17.47    1.56
  10  -3   7    2.63    0.88
  10  -3   8    6.43    1.18
  10  -3   9    0.41    0.77
  10  -3  10    0.41    0.87
  10  -3  11   -0.01    0.88
  10  -3  12   -0.21    0.93
 -11   3  13    2.97    1.35
 -11   3  13   -1.95    1.31
 -11   3  12   -1.86    1.09
 -11   3  12   -1.64    1.28
 -11   3  11   -2.02    1.22
 -11   3  11    0.61    1.08
 -11   3  10   16.12    1.74
 -11   3  10   12.31    1.68
  11  -3  -9    0.46    0.95
 -11   3   9    2.78    1.12
 -11   3   9    1.42    1.17
  11  -3  -8    3.48    1.11
 -11   3   8    4.28    1.22
  11  -3  -7    1.97    1.00
 -11   3   7    1.03    1.00
  11  -3  -6   21.88    1.83
  11  -3  -5    2.18    0.94
  11  -3  -4    6.70    1.16
  11  -3  -3   21.76    1.68
  11  -3  -2    8.93    1.19
  11  -3  -1   14.90    1.33
  11  -3  -1   13.25    1.35
  11  -3   0   15.21    1.40
  11  -3   0   16.80    1.41
  11  -3   1   16.04    1.36
  11  -3   1   18.51    1.45
  11  -3   2    6.67    0.96
  11  -3   2    7.99    1.00
  11  -3   3   -0.11    0.57
  11  -3   3    0.44    0.60
  11  -3   4   10.54    1.22
  11  -3   5    2.58    0.82
  11  -3   6    8.24    1.20
  11  -3   7    0.82    0.72
  11  -3   8   11.16    1.48
  11  -3   9    0.59    0.85
  11  -3  10   21.87    2.07
  11  -3  11    1.57    1.00
  11  -3  12    0.28    0.91
 -12   3  13   -1.86    1.39
 -12   3  13    1.77    1.38
 -12   3  12    0.69    1.51
 -12   3  12    5.26    1.46
 -12   3  11    3.61    1.50
 -12   3  11    8.18    1.54
 -12   3  10    5.03    1.52
 -12   3  10    9.62    1.58
  12  -3  -9    1.08    1.08
 -12   3   9    0.67    1.03
 -12   3   9   -0.34    1.12
  12  -3  -8    0.89    1.03
 -12   3   8    2.22    1.15
  12  -3  -7    1.26    0.99
 -12   3   7    0.86    0.97
  12  -3  -6    2.43    1.04
  12  -3  -5    6.48    1.25
  12  -3  -4    3.94    1.12
  12  -3  -3   27.38    1.87
  12  -3  -2   24.78    1.75
  12  -3  -1    1.17    0.82
  12  -3  -1    2.27    0.70
  12  -3   0    0.16    0.59
  12  -3   0    0.79    0.75
  12  -3   1    5.70    1.02
  12  -3   1    6.41    1.00
  12  -3   2   13.60    1.30
  12  -3   2   11.89    1.24
  12  -3   3    6.14    0.99
  12  -3   4    0.94    0.68
  12  -3   5   -0.62    0.58
  12  -3   6    1.56    0.84
  12  -3   7    2.72    0.94
  12  -3   8    4.07    1.08
  12  -3   9    0.25    0.85
  12  -3  10   -0.19    0.84
  12  -3  11    2.22    1.15
 -13   3  12    5.10    1.45
 -13   3  12   -0.37    1.52
 -13   3  11   -0.19    1.44
 -13   3  11    1.31    1.21
 -13   3  10    8.13    1.52
 -13   3  10    1.88    1.42
  13  -3  -9    8.77    1.58
 -13   3   9   11.86    1.66
 -13   3   9    8.57    1.64
  13  -3  -8    1.56    1.10
 -13   3   8    0.61    1.05
  13  -3  -7    0.77    1.01
 -13   3   7    2.87    1.10
  13  -3  -6    1.24    1.02
  13  -3  -5    0.74    0.92
  13  -3  -4   38.30    2.26
  13  -3  -3    8.24    1.38
  13  -3  -2   15.13    1.61
  13  -3  -1    6.88    1.05
  13  -3  -1    5.58    1.11
  13  -3   0   16.07    1.50
  13  -3   0   13.11    1.34
  13  -3   1    1.12    0.83
  13  -3   1    2.03    0.77
  13  -3   2    2.04    0.85
  13  -3   2    3.17    0.84
  13  -3   3    1.62    0.75
  13  -3   4    4.09    0.95
  13  -3   5    0.16    0.68
  13  -3   6    0.17    0.71
  13  -3   7    3.16    1.00
  13  -3   8    6.23    1.23
  13  -3   9   -1.15    0.76
  13  -3  10    3.61    1.19
 -14   3  11    2.71    1.34
 -14   3  11    0.06    1.46
 -14   3  10    2.91    1.53
 -14   3  10    6.77    1.52
  14  -3  -9    4.41    1.40
 -14   3   9    5.30    1.50
 -14   3   9    7.45    1.54
  14  -3  -8    7.33    1.52
 -14   3   8    8.49    1.49
  14  -3  -7    1.58    1.12
 -14   3   7    0.61    1.03
  14  -3  -6    6.30    1.38
  14  -3  -5    2.83    1.12
  14  -3  -4    0.75    0.94
  14  -3  -3    0.75    0.95
  14  -3  -2    3.82    1.14
  14  -3  -1    5.89    1.18
  14  -3   0    5.31    1.04
  14  -3   0    5.27    1.09
  14  -3   1    0.05    0.68
  14  -3   1    0.61    0.83
  14  -3   2   24.04    1.84
  14  -3   3    5.37    1.04
  14  -3   4    9.91    1.35
  14  -3   5    1.67    0.88
  14  -3   6    4.82    1.14
  14  -3   7    0.05    0.80
  14  -3   8    4.40    1.16
  14  -3   9   -0.48    0.78
 -15   3  10    5.91    1.51
 -15   3  10    1.48    1.54
  15  -3  -9   -0.06    1.21
 -15   3   9    0.59    1.18
 -15   3   9   -0.62    1.29
  15  -3  -8    0.89    1.17
 -15   3   8    1.36    1.21
 -15   3   8   -0.41    1.08
  15  -3  -7   -0.15    1.07
 -15   3   7    2.34    1.20
  15  -3  -6    4.13    1.31
  15  -3  -5    0.92    1.04
  15  -3  -4    4.71    1.28
  15  -3  -3    0.87    0.98
  15  -3  -2    1.10    0.94
  15  -3  -1    1.05    0.93
  15  -3   0   14.02    1.57
  15  -3   0   11.15    1.43
  15  -3   1    0.78    0.81
  15  -3   1    2.16    0.98
  15  -3   2    0.01    0.72
  15  -3   3    1.62    0.86
  15  -3   4    2.24    0.93
  15  -3   5   12.56    1.58
  15  -3   6    8.95    1.43
  15  -3   7    5.11    1.25
  16  -3  -9    3.82    1.53
  16  -3  -8   11.26    1.85
 -16   3   8   12.94    1.84
 -16   3   8   11.01    1.73
  16  -3  -7    1.33    1.24
 -16   3   7    3.99    1.37
  16  -3  -6    5.17    1.43
  16  -3  -5    1.86    1.21
  16  -3  -4    0.49    1.03
  16  -3  -3    0.67    1.07
  16  -3  -2    0.44    0.98
  16  -3  -1    1.61    1.02
  16  -3   0   -0.27    0.91
  16  -3   0   -0.36    0.75
  16  -3   1    2.01    0.95
  16  -3   2    8.35    1.31
  16  -3   3    0.86    0.81
  16  -3   4    2.70    0.99
  16  -3   5    0.76    0.82
  16  -3   6    5.90    1.26
  17  -3  -7    0.98    1.27
  17  -3  -6    5.34    1.55
  17  -3  -5    1.09    1.19
  17  -3  -3    2.62    1.23
  17  -3  -2    4.30    1.31
  17  -3  -1   -0.55    0.97
  17  -3   1   -0.42    0.80
  17  -3   2    0.23    0.83
  17  -3   3    7.16    1.37
  17  -3   4    1.71    0.98
  18  -3  -3    2.36    1.27
  18  -3  -2    8.58    1.60
  18   4  -1    1.10    1.08
  18   4  -2    0.87    1.05
  18   4  -3    0.77    1.10
  17   4   4    0.18    0.89
  17   4   3    0.82    0.90
  17   4   2    0.62    0.91
  17   4   1    4.01    1.20
  17   4   0   -1.10    0.84
  17   4  -1    1.85    1.07
  17   4  -2   10.60    1.60
  17   4  -3    3.46    1.22
  17   4  -4    3.88    1.29
  17   4  -5    1.06    1.08
  17   4  -6    2.27    1.19
  16   4   6    1.54    0.97
  16   4   5    1.82    1.01
  16   4   4   16.20    1.79
  16   4   3   -0.68    0.78
  16   4   2    4.33    1.18
  16   4   2    5.63    1.21
  16   4   1   -0.07    0.79
  16   4   1    0.55    0.91
  16   4   0    0.83    0.90
  16   4  -1    0.73    0.94
  16   4  -2    4.84    1.20
  16   4  -3    2.33    1.08
  16   4  -4   10.19    1.59
  16   4  -5    7.60    1.54
  16   4  -6    3.84    1.24
  16   4  -7    1.89    1.15
 -16  -4   8    2.40    1.52
  16   4  -8    0.28    1.00
  15   4   7    4.34    1.20
  15   4   6   10.19    1.49
  15   4   5    1.79    0.92
  15   4   4    2.15    0.94
  15   4   3    4.48    1.18
  15   4   3    3.03    1.00
  15   4   2    9.56    1.41
  15   4   2    8.27    1.28
  15   4   1    7.29    1.26
  15   4   1    5.43    1.18
  15   4   0    2.75    1.09
  15   4  -1    0.42    0.89
  15   4  -2    0.46    0.85
  15   4  -3   -0.02    0.83
  15   4  -4    1.29    0.95
  15   4  -5    1.97    1.02
  15   4  -6    3.70    1.20
  15   4  -7    3.61    1.20
 -15  -4   8    7.93    1.74
  15   4  -8    8.43    1.53
 -15  -4   9    7.19    1.85
  15   4  -9    7.54    1.51
 -15  -4  10    0.23    1.55
  15   4 -10    0.57    1.08
  14   4   9    1.33    1.01
  14   4   8    0.55    0.86
  14   4   7    0.83    0.91
  14   4   6    9.50    1.40
  14   4   5    2.82    0.94
  14   4   4   12.11    1.48
  14   4   4   13.29    1.53
  14   4   3    0.56    0.74
  14   4   3    0.48    0.87
  14   4   2   -0.01    0.71
  14   4   2   -0.77    0.79
  14   4   1   12.52    1.49
  14   4   1   10.63    1.39
  14   4   0    0.30    0.83
  14   4   0    0.20    0.76
  14   4  -1    0.88    0.83
  14   4  -2    8.46    1.34
  14   4  -3    0.10    0.84
  14   4  -4    0.55    0.89
  14   4  -5    0.16    0.81
  14   4  -6    3.28    1.09
  14   4  -7    0.63    0.92
 -14  -4   8    4.82    1.56
  14   4  -8    4.39    1.24
 -14  -4   9    5.62    1.73
  14   4  -9    5.66    1.33
 -14  -4  10   11.03    1.97
  14   4 -10   13.99    1.87
 -14  -4  11    1.09    1.67
  14   4 -11    1.13    1.10
  13   4  10    2.90    1.12
  13   4   9    0.23    0.83
  13   4   8    0.40    0.86
  13   4   7    1.40    0.89
  13   4   6    3.12    0.93
  13   4   5    2.33    0.85
  13   4   4    5.88    1.07
  13   4   4    3.72    0.96
  13   4   3   10.83    1.31
  13   4   3    9.38    1.31
  13   4   2   14.06    1.49
  13   4   2   14.80    1.52
  13   4   1   24.19    1.84
  13   4   1   24.51    1.82
  13   4   0    2.08    0.82
  13   4   0    3.79    1.04
  13   4  -1   -0.48    0.78
  13   4  -2    6.94    1.23
  13   4  -3    6.66    1.22
  13   4  -4    1.17    0.88
  13   4  -5    1.74    0.95
  13   4  -6    9.83    1.44
  13   4  -7    7.44    1.31
 -13  -4   8   11.47    1.74
  13   4  -8   12.50    1.61
 -13  -4   9   -0.31    1.29
  13   4  -9   -0.64    0.86
 -13  -4  10    2.00    1.53
  13   4 -10    0.85    1.05
 -13  -4  11   -0.80    1.48
  13   4 -11    0.39    1.00
 -13  -4  12   -2.00    1.47
  13   4 -12    0.01    1.05
  12   4  11    2.27    1.12
  12   4  10    5.16    1.30
  12   4   9   11.08    1.56
  12   4   8   -0.62    0.70
  12   4   7   -0.53    0.64
  12   4   6    0.94    0.74
  12   4   5   -0.22    0.75
  12   4   5    0.19    0.66
  12   4   4    7.27    1.12
  12   4   4    7.69    1.16
  12   4   3   -0.13    0.71
  12   4   3    0.07    0.63
  12   4   2    1.43    0.70
  12   4   2    0.32    0.74
  12   4   1   20.13    1.64
  12   4   1   19.19    1.62
  12   4   0   27.43    1.78
  12   4   0   29.10    1.87
  12   4  -1    0.69    0.76
  12   4  -2   35.02    2.06
  12   4  -3    4.20    1.03
  12   4  -4   12.35    1.46
  12   4  -5    0.59    0.84
  12   4  -6    1.58    0.90
 -12  -4   7    0.78    1.07
  12   4  -7    0.93    0.86
 -12  -4   8   11.09    1.66
  12   4  -8    9.02    1.40
 -12  -4   9    2.08    1.33
  12   4  -9    2.33    1.03
 -12  -4  10    4.05    1.53
  12   4 -10    6.73    1.34
 -12  -4  11    3.32    1.66
  12   4 -11    3.79    1.19
 -12  -4  12    1.54    1.64
  12   4 -12    0.45    1.04
  12   4 -13    3.59    1.36
  11   4  11    0.53    0.95
  11   4  10    0.72    0.90
  11   4   9    0.99    0.85
  11   4   8    2.45    0.93
  11   4   7    4.04    0.98
  11   4   6    9.85    1.28
  11   4   5    4.66    0.96
  11   4   5    6.51    1.03
  11   4   4    0.19    0.55
  11   4   4    0.11    0.65
  11   4   3   -0.31    0.65
  11   4   3    0.33    0.56
  11   4   2    1.50    0.72
  11   4   2    0.64    0.72
  11   4   1    1.52    0.67
  11   4   1    1.86    0.77
  11   4   0    1.76    0.79
  11   4   0    3.97    0.83
  11   4  -1   11.51    1.30
  11   4  -2   59.33    2.49
  11   4  -3   35.43    1.98
  11   4  -4   -0.38    0.67
  11   4  -5    0.86    0.79
  11   4  -6    3.72    1.01
 -11  -4   7    7.43    1.40
  11   4  -7    5.08    1.08
 -11  -4   8    0.00    1.08
  11   4  -8    0.04    0.82
 -11  -4   9    0.28    1.20
  11   4  -9    1.04    0.91
 -11  -4  10   14.92    1.94
  11   4 -10   16.80    1.79
 -11  -4  11    6.05    1.69
  11   4 -11    8.59    1.42
 -11  -4  12    6.75    1.87
  11   4 -12    7.49    1.42
 -11  -4  13    3.21    1.69
  11   4 -13    4.90    1.41
  10   4  12    4.69    1.27
  10   4  11    8.42    1.45
  10   4  10   19.67    1.99
  10   4   9   20.54    1.91
  10   4   8    1.65    0.81
  10   4   7   16.24    1.64
  10   4   6    0.97    0.76
  10   4   6    1.52    0.71
  10   4   5    3.56    0.81
  10   4   5    2.94    0.83
  10   4   4   16.33    1.47
  10   4   4   15.95    1.37
  10   4   3    1.05    0.63
  10   4   3    0.26    0.68
  10   4   2   -0.40    0.60
  10   4   2    0.44    0.55
  10   4   1    8.05    1.07
  10   4   1    7.72    0.99
  10   4   0   53.04    2.19
  10   4   0   52.24    2.25
  10   4  -1    2.10    0.77
  10   4  -1    3.02    0.77
  10   4  -2   -0.05    0.65
  10   4  -3    3.19    0.92
  10   4  -4   11.30    1.29
  10   4  -5    5.47    1.00
  10   4  -6   16.30    1.50
 -10  -4   7   12.22    1.56
  10   4  -7   14.24    1.46
 -10  -4   8    0.54    1.09
  10   4  -8    0.10    0.77
 -10  -4   9    4.47    1.38
  10   4  -9    4.03    1.07
 -10  -4  10   -0.47    1.18
  10   4 -10    1.21    0.87
 -10  -4  11   -0.92    1.25
  10   4 -11    1.06    0.89
 -10  -4  12    0.07    1.48
  10   4 -12    0.24    0.94
 -10  -4  13   12.84    2.15
  10   4 -13   13.13    1.73
 -10  -4  14    4.23    1.78
 -10  -4  14    7.29    1.44
   9   4  13   -0.83    0.91
   9   4  12    0.53    1.01
   9   4  11   -0.36    0.84
   9   4  10    0.41    0.78
   9   4   9    1.62    0.86
   9   4   8    0.99    0.72
   9   4   7   64.29    2.73
   9   4   7   62.02    2.38
   9   4   6   21.55    1.51
   9   4   6   22.76    1.66
   9   4   5   10.38    1.16
   9   4   5   11.57    1.16
   9   4   4    3.88    0.81
   9   4   4    3.99    0.86
   9   4   3   10.39    1.12
   9   4   3    8.46    1.01
   9   4   2    5.02    0.89
   9   4   2    3.61    0.76
   9   4   1    1.13    0.57
   9   4   1    3.00    0.77
   9   4   0   14.53    1.36
   9   4   0   11.75    1.16
   9   4  -1    1.63    0.62
   9   4  -1    1.93    0.72
   9   4  -2   35.30    1.79
   9   4  -3   10.53    1.17
   9   4  -4   12.91    1.29
   9   4  -5   28.82    1.77
   9   4  -6   -0.07    0.69
  -9  -4   7    8.42    1.37
   9   4  -7    9.24    1.21
  -9  -4   8   24.90    2.29
   9   4  -8   25.72    1.73
  -9  -4   9   11.30    1.66
   9   4  -9   11.67    1.39
  -9  -4  10    0.18    1.24
   9   4 -10   -0.07    0.78
  -9  -4  11    0.63    1.29
   9   4 -11    1.56    0.91
  -9  -4  12    6.22    1.67
   9   4 -12    4.85    1.24
  -9  -4  13    1.67    1.52
  -9  -4  13    4.41    1.25
   9   4 -13    0.64    1.13
  -9  -4  14   -1.29    1.43
   8   4  13    5.77    1.38
   8   4  12    3.00    1.16
   8   4  11    7.41    1.34
   8   4  10    1.11    0.87
   8   4   9    0.96    0.83
   8   4   8    9.00    1.21
   8   4   7   22.01    1.58
   8   4   7   23.88    1.78
   8   4   6   48.67    2.03
   8   4   6   45.14    2.14
   8   4   5   14.38    1.41
   8   4   5   15.48    1.38
   8   4   4  134.76    3.51
   8   4   4  142.98    3.81
   8   4   3   31.26    1.65
   8   4   3   30.73    1.60
   8   4   2    5.48    0.86
   8   4   2    4.70    0.78
   8   4   1   13.43    1.24
   8   4   1   13.34    1.25
   8   4   0   27.94    1.50
   8   4   0   28.72    1.57
   8   4  -1    1.90    0.56
   8   4  -1    2.30    0.68
   8   4  -2   35.33    1.70
   8   4  -3   24.28    1.52
   8   4  -4   19.92    1.51
   8   4  -5   12.70    1.30
  -8  -4   6   22.63    2.16
   8   4  -6   25.19    1.65
  -8  -4   7   24.42    2.24
   8   4  -7   24.90    1.64
  -8  -4   8    1.83    1.12
   8   4  -8    1.82    0.77
  -8  -4   9    1.79    1.22
   8   4  -9    2.44    0.86
  -8  -4  10    2.22    1.27
   8   4 -10    1.80    0.86
  -8  -4  11   -0.26    1.23
   8   4 -11    0.49    0.81
  -8  -4  12   -0.26    1.28
   8   4 -12   -0.63    0.84
  -8  -4  13    0.70    1.05
  -8  -4  13   -0.98    1.34
   8   4 -13   -0.19    1.05
  -8  -4  14    4.47    1.70
  -8  -4  15    2.35    1.62
   7   4  14    0.29    1.00
   7   4  13   -0.66    0.86
   7   4  12   13.74    1.68
   7   4  11    3.34    1.04
   7   4  10   -0.09    0.71
   7   4   9   -0.17    0.67
   7   4   8    9.08    1.22
   7   4   8    9.45    1.12
   7   4   7   86.52    2.72
   7   4   7   88.36    3.07
   7   4   6   11.41    1.18
   7   4   6   11.51    1.14
   7   4   5   11.12    1.06
   7   4   5    9.90    1.07
   7   4   4    2.04    0.62
   7   4   4    2.27    0.69
   7   4   3   55.13    1.93
   7   4   3   56.79    2.03
   7   4   2    0.13    0.41
   7   4   2    0.42    0.54
   7   4   1   10.83    1.06
   7   4   1    9.84    0.95
   7   4   0   50.21    1.86
   7   4   0   46.76    1.82
   7   4  -1   20.79    1.23
   7   4  -1   19.69    1.24
   7   4  -2   20.76    1.30
   7   4  -3   15.93    1.22
   7   4  -4    1.05    0.62
   7   4  -5   48.19    1.98
  -7  -4   6   75.18    2.99
   7   4  -6   70.03    2.44
  -7  -4   7    5.23    1.26
   7   4  -7    6.07    0.97
  -7  -4   8    9.48    1.41
   7   4  -8    9.66    1.16
  -7  -4   9   12.59    1.57
   7   4  -9   12.56    1.31
  -7  -4  10   -0.78    1.06
   7   4 -10   -0.37    0.73
  -7  -4  11    0.15    1.16
   7   4 -11    2.17    0.90
  -7  -4  12   -0.38    1.17
   7   4 -12    0.53    0.89
  -7  -4  13    3.13    1.45
  -7  -4  13    5.40    1.18
  -7  -4  14   -0.65    1.38
  -7  -4  15   -0.94    1.37
   6   4  14    6.90    1.45
   6   4  13    5.33    1.32
   6   4  12    0.23    0.84
   6   4  11    1.71    0.91
   6   4  10    0.38    0.70
   6   4   9   -0.31    0.65
   6   4   8   -0.63    0.59
   6   4   8   -0.77    0.69
   6   4   7    4.64    0.89
   6   4   7    5.83    0.94
   6   4   6   83.66    2.77
   6   4   6   85.12    2.55
   6   4   5   16.95    1.34
   6   4   5   19.87    1.32
   6   4   4   11.18    1.10
   6   4   4   12.87    1.14
   6   4   3  146.75    3.45
   6   4   3  150.49    3.62
   6   4   2   -0.09    0.34
   6   4   2    0.39    0.48
   6   4   1   14.54    1.01
   6   4   1   15.30    1.06
   6   4   0   92.34    2.50
   6   4   0   94.33    2.54
   6   4  -1   86.42    2.42
   6   4  -1   87.87    2.41
   6   4  -2    5.98    0.75
   6   4  -3   46.66    1.74
   6   4  -4    5.61    0.80
  -6  -4   5    0.32    0.76
   6   4  -5    0.14    0.54
  -6  -4   6   34.02    2.18
   6   4  -6   33.25    1.64
  -6  -4   7    2.84    1.08
   6   4  -7    3.32    0.81
  -6  -4   8    5.14    1.28
   6   4  -8    5.75    0.98
  -6  -4   9   25.02    2.21
   6   4  -9   22.79    1.55
  -6  -4  10   13.56    1.64
   6   4 -10   15.75    1.40
  -6  -4  11    3.98    1.31
   6   4 -11    5.38    1.08
  -6  -4  12   16.40    1.61
  -6  -4  12   10.67    1.65
   6   4 -12   10.82    1.39
  -6  -4  13   -1.06    1.13
  -6  -4  14   -0.56    1.23
  -6  -4  15    1.21    1.38
   5   4  15   -0.65    0.99
   5   4  14    4.13    1.27
   5   4  13    5.87    1.34
   5   4  12    4.77    1.15
   5   4  11   10.24    1.37
   5   4  10    3.55    0.98
   5   4   9    1.57    0.76
   5   4   9    1.21    0.87
   5   4   8    0.33    0.62
   5   4   8    0.53    0.80
   5   4   7   24.24    1.62
   5   4   7   23.08    1.66
   5   4   6    9.44    1.00
   5   4   6   14.95    1.37
   5   4   5    1.23    0.65
   5   4   5    1.65    0.56
   5   4   4   27.93    1.41
   5   4   4   28.42    1.38
   5   4   3   33.34    1.41
   5   4   3   30.55    1.35
   5   4   2  261.34    5.28
   5   4   2  264.29    5.25
   5   4   1   14.50    0.93
   5   4   1   14.52    0.98
   5   4   0   57.68    1.78
   5   4   0   59.58    1.82
   5   4  -1   24.09    1.16
   5   4  -2  100.43    2.57
   5   4  -3    5.48    0.70
  -5  -4   4    1.51    0.30
   5   4  -4    0.90    0.49
  -5  -4   5   20.91    1.55
   5   4  -5   21.17    1.21
  -5  -4   6   53.39    2.37
   5   4  -6   49.56    1.86
  -5  -4   7    4.01    1.07
   5   4  -7    3.91    0.75
  -5  -4   8   -0.29    0.99
   5   4  -8   -0.17    0.62
  -5  -4   9   32.23    2.38
   5   4  -9   30.69    1.68
  -5  -4  10    1.36    1.02
   5   4 -10    1.27    0.73
  -5  -4  11   14.81    1.73
   5   4 -11   13.93    1.42
  -5  -4  12   20.46    1.62
  -5  -4  12   14.69    1.80
  -5  -4  13    3.86    1.35
  -5  -4  14    1.38    1.33
  -5  -4  15    0.14    1.23
   4   4  15    0.17    1.07
   4   4  14    6.33    1.37
   4   4  13    1.00    0.97
   4   4  12    5.34    1.18
   4   4  11    0.76    0.79
   4   4  10   18.35    1.67
   4   4   9   30.16    1.88
   4   4   9   29.75    1.92
   4   4   8   21.94    1.78
   4   4   8   21.56    1.62
   4   4   7    0.04    0.55
   4   4   7    0.44    0.79
   4   4   6    5.81    0.90
   4   4   6    4.34    0.74
   4   4   5    1.95    0.67
   4   4   5    1.49    0.50
   4   4   4   66.75    2.00
   4   4   4   64.59    2.02
   4   4   3   71.10    2.05
   4   4   3   77.90    2.11
   4   4   2   38.51    1.37
   4   4   2   37.09    1.34
   4   4   1   24.87    1.08
   4   4   1   25.03    1.11
   4   4   0   21.21    1.02
   4   4   0   18.70    0.98
   4   4  -1   52.58    1.61
   4   4  -2   10.14    0.83
   4   4  -3   59.50    1.78
  -4  -4   4   18.92    1.34
  -4  -4   4   19.36    0.72
   4   4  -4   19.09    1.10
  -4  -4   5   14.11    0.58
  -4  -4   5   14.05    1.16
   4   4  -5   14.41    1.00
  -4  -4   6    1.66    0.81
   4   4  -6    1.58    0.54
  -4  -4   7    0.46    0.86
   4   4  -7   -0.03    0.53
  -4  -4   8   45.40    2.49
   4   4  -8   42.32    1.78
  -4  -4   9   30.62    2.19
   4   4  -9   31.70    1.64
  -4  -4  10   63.48    2.88
   4   4 -10   69.65    2.40
  -4  -4  11    0.17    1.00
  -4  -4  11    2.84    0.83
  -4  -4  12    0.54    1.10
  -4  -4  13   -0.06    1.09
  -4  -4  14    0.03    1.14
  -4  -4  15    3.77    1.46
  -4  -4  16   -2.05    1.18
   3   4  15   -2.68    0.79
   3   4  14    5.95    1.32
   3   4  13    9.92    1.48
   3   4  12    2.97    1.03
   3   4  11    5.72    1.10
   3   4  10   11.39    1.29
   3   4  10   12.68    1.38
   3   4   9   24.80    1.78
   3   4   9   24.86    1.81
   3   4   8   13.71    1.39
   3   4   8   13.19    1.28
   3   4   7   55.85    2.20
   3   4   7   58.80    2.19
   3   4   6   27.55    1.46
   3   4   6   28.16    1.54
   3   4   5    0.12    0.40
   3   4   5    0.06    0.58
   3   4   4   36.28    1.48
   3   4   4   32.81    1.32
   3   4   3    5.05    0.66
   3   4   3    5.53    0.56
   3   4   2   36.74    1.23
   3   4   2   37.08    1.35
   3   4   1   24.20    0.97
   3   4   1   24.55    1.05
   3   4   0   10.27    0.72
   3   4   0    9.33    0.77
   3   4  -1    6.36    0.58
   3   4  -2   75.66    1.93
  -3  -4   3    7.31    0.58
  -3  -4   3    6.99    0.71
   3   4  -3    7.99    0.70
  -3  -4   4    6.07    0.49
  -3  -4   4    5.11    0.71
   3   4  -4    6.48    0.63
  -3  -4   5    0.22    0.61
  -3  -4   5   -0.13    0.20
   3   4  -5    0.06    0.40
  -3  -4   6    1.57    0.73
  -3  -4   6    1.62    0.27
   3   4  -6    1.42    0.51
  -3  -4   7    1.99    0.87
  -3  -4   7    1.45    0.30
   3   4  -7    1.03    0.55
  -3  -4   8    2.68    0.97
   3   4  -8    4.30    0.75
  -3  -4   9   22.84    2.03
   3   4  -9   22.84    1.40
  -3  -4  10   15.02    1.24
  -3  -4  10   12.88    1.45
   3   4 -10   10.89    1.10
  -3  -4  11   31.94    1.61
  -3  -4  11   27.55    2.17
  -3  -4  12    8.44    1.40
  -3  -4  13    5.47    1.33
  -3  -4  14    0.82    1.17
  -3  -4  15   -2.18    1.05
  -3  -4  16   -0.30    1.27
   2   4  15   -1.18    0.99
   2   4  14    1.35    1.04
   2   4  13    1.15    0.97
   2   4  12    0.95    0.87
   2   4  11    0.55    0.76
   2   4  11    0.46    1.01
   2   4  10   24.03    1.84
   2   4  10   22.24    1.69
   2   4   9   51.27    2.32
   2   4   9   51.96    2.30
   2   4   8    5.92    1.04
   2   4   8    5.89    0.88
   2   4   7    0.77    0.78
   2   4   7    0.92    0.56
   2   4   6   17.72    1.36
   2   4   6   14.61    1.14
   2   4   5    4.84    0.75
   2   4   5    4.47    0.59
   2   4   4   48.57    1.68
   2   4   4   50.94    1.55
   2   4   3    0.04    0.45
   2   4   3    0.14    0.24
   2   4   2    0.52    0.45
   2   4   2    0.27    0.24
   2   4   1    9.73    0.88
   2   4   1    7.06    0.63
   2   4   0   84.17    1.84
   2   4   0   80.98    1.94
   2   4  -1   52.86    1.45
  -2  -4   2   23.29    0.84
   2   4  -2   22.20    0.92
  -2  -4   3   31.51    0.90
  -2  -4   3   31.01    1.36
   2   4  -3   30.35    1.08
  -2  -4   4   58.97    1.87
  -2  -4   4   57.33    1.31
   2   4  -4   58.40    1.57
  -2  -4   5  117.83    2.28
  -2  -4   5  121.38    3.05
   2   4  -5  119.68    2.66
  -2  -4   6   41.65    1.89
  -2  -4   6   36.33    1.08
   2   4  -6   37.98    1.32
  -2  -4   7    0.78    0.72
  -2  -4   7    0.46    0.29
   2   4  -7    0.25    0.46
  -2  -4   8    0.32    0.34
  -2  -4   8    0.13    0.80
   2   4  -8   -0.49    0.49
  -2  -4   9    6.76    1.17
   2   4  -9    8.48    0.91
  -2  -4  10    0.99    0.88
  -2  -4  10    1.49    0.63
  -2  -4  11    5.93    1.19
  -2  -4  12    2.10    1.05
  -2  -4  13   -1.46    0.88
  -2  -4  14    7.75    1.50
  -2  -4  15    9.84    1.66
  -2  -4  16    4.05    1.44
   1   4  16   -0.03    1.07
   1   4  15    1.95    1.10
   1   4  14   -1.00    0.90
   1   4  13   -0.20    0.83
   1   4  12   -1.01    0.72
   1   4  11   -0.73    0.68
   1   4  11   -1.88    0.94
   1   4  10    0.54    0.69
   1   4  10    0.53    0.93
   1   4   9   34.81    1.87
   1   4   9   32.34    2.07
   1   4   8   23.44    1.74
   1   4   8   25.61    1.58
   1   4   7   96.33    2.76
   1   4   7   98.17    2.77
   1   4   6   49.43    1.75
   1   4   6   48.93    1.86
   1   4   5    9.76    0.89
   1   4   5    9.60    0.88
   1   4   4    2.01    0.37
   1   4   4    1.11    0.53
   1   4   3   65.25    1.59
   1   4   3   64.26    1.81
   1   4   2   68.65    1.85
   1   4   2   67.52    1.54
   1   4   1   71.96    1.84
   1   4   1   71.18    1.53
   1   4   0   70.25    1.74
  -1  -4   1   30.74    1.00
   1   4  -1   33.95    1.09
  -1  -4   2  137.78    2.56
  -1  -4   2  141.10    2.91
   1   4  -2  137.06    2.75
  -1  -4   3   41.05    1.45
  -1  -4   3   40.95    1.06
   1   4  -3   40.20    1.14
  -1  -4   4   52.05    1.76
  -1  -4   4   50.97    1.26
   1   4  -4   51.87    1.36
  -1  -4   5   13.62    1.23
  -1  -4   5   10.74    0.66
   1   4  -5   11.66    0.70
  -1  -4   6    9.11    0.68
  -1  -4   6    9.05    0.94
   1   4  -6    9.12    0.71
  -1  -4   7    0.96    0.34
  -1  -4   7    0.84    0.67
   1   4  -7    0.59    0.43
  -1  -4   8    1.47    0.41
  -1  -4   8    3.61    0.90
   1   4  -8    2.90    0.58
  -1  -4   9   21.07    1.20
  -1  -4   9   21.38    1.86
  -1  -4  10    0.84    0.82
  -1  -4  11   -1.17    0.74
  -1  -4  12   12.15    1.48
  -1  -4  13    6.52    1.32
  -1  -4  14   -0.93    0.95
  -1  -4  15    0.94    1.19
  -1  -4  16    0.88    1.22
   0   4  16    2.93    1.26
   0   4  15    3.74    1.27
   0   4  14    2.05    1.09
   0   4  13    0.57    0.87
   0   4  12    0.90    0.87
   0   4  12    0.54    1.10
   0   4  11   -0.67    0.69
   0   4  11   -1.02    0.93
   0   4  10   19.58    1.74
   0   4  10   22.05    1.68
   0   4   9   14.54    1.40
   0   4   9   11.14    1.15
   0   4   8    2.31    0.74
   0   4   8    2.93    0.95
   0   4   7    0.00    0.52
   0   4   7   -0.77    0.72
   0   4   6   17.00    1.12
   0   4   6   14.15    1.30
   0   4   5    1.68    0.44
   0   4   5    1.87    0.63
   0   4   4  135.31    2.80
   0   4   4  128.78    2.96
   0   4   3  161.48    3.39
   0   4   3  162.47    3.10
   0   4   2    6.43    0.48
   0   4   2    5.42    0.65
   0   4   1   29.51    1.20
   0   4   1   26.57    0.66
   0  -4   0    0.14    0.27
   0   4   0    0.73    0.41
   0  -4   1   28.07    0.95
   0  -4   1   28.38    1.03
   0   4  -1   29.35    0.99
   0  -4   2    5.27    0.42
   0  -4   2    5.65    0.53
   0   4  -2    7.07    0.57
   0  -4   3  159.32    2.98
   0  -4   3  163.87    3.37
   0   4  -3  164.97    3.04
   0  -4   4  134.19    3.06
   0  -4   4  134.94    2.62
   0   4  -4  134.15    2.60
   0  -4   5    1.99    0.57
   0  -4   5    2.01    0.34
   0   4  -5    1.70    0.31
   0  -4   6   15.60    0.87
   0  -4   6   15.84    1.31
   0   4  -6   15.11    0.74
   0  -4   7    0.23    0.34
   0  -4   7   -0.32    0.37
   0  -4   7    0.24    0.63
   0  -4   8    1.83    0.49
   0  -4   8    3.43    0.56
   0  -4   8    1.37    0.77
   0  -4   9   10.65    1.25
   0  -4   9   12.27    1.00
   0  -4  10   19.31    1.71
   0  -4  11   -0.06    0.78
   0  -4  12    0.95    0.93
   0  -4  13    0.00    0.90
   0  -4  14    2.31    1.13
   0  -4  15    2.45    1.26
   0  -4  16    0.81    1.19
  -1   4  16    0.82    1.19
  -1   4  15    0.95    1.09
  -1   4  14    1.42    1.04
  -1   4  13    6.40    1.23
  -1   4  12   16.58    1.67
  -1   4  12   14.68    1.50
  -1   4  11   -0.04    0.97
  -1   4  11   -1.28    0.67
  -1   4  10   -0.19    0.67
  -1   4  10   -0.72    0.91
  -1   4   9   24.93    1.72
  -1   4   9   21.39    1.85
  -1   4   8    1.38    0.69
  -1   4   8    2.13    0.93
  -1   4   7    0.52    0.54
  -1   4   7    0.45    0.79
  -1   4   6    8.40    0.93
  -1   4   6    7.91    0.74
  -1   4   5   11.58    1.10
  -1   4   5   13.13    0.93
  -1   4   4   51.65    1.43
  -1   4   3   41.13    1.12
  -1   4   2  122.57    2.82
  -1   4   2  136.34    2.37
   1  -4  -1   30.58    0.97
  -1   4   1   28.96    1.18
   1  -4   0   67.79    1.51
   1  -4   0   68.90    1.26
  -1   4   0   65.12    1.61
   1  -4   1   70.89    1.54
   1  -4   1   72.69    1.57
  -1   4  -1   68.84    1.60
   1  -4   2   67.00    1.55
   1  -4   2   71.20    1.70
  -1   4  -2   69.10    1.45
   1  -4   3   63.23    1.54
   1  -4   3   66.46    1.75
  -1   4  -3   65.45    1.30
   1  -4   4    1.28    0.44
   1  -4   4    1.44    0.31
   1  -4   5    8.79    0.82
   1  -4   5    6.70    0.56
   1  -4   6   47.85    1.48
   1  -4   6   45.16    1.79
   1  -4   7   95.86    2.34
   1  -4   7   91.91    2.78
   1  -4   7   90.69    1.92
   1  -4   8   20.97    1.66
   1  -4   8   22.53    0.98
   1  -4   8   23.34    1.23
   1  -4   9   29.69    1.95
   1  -4  10   -0.38    0.70
   1  -4  11    0.44    0.76
   1  -4  12    0.71    0.86
   1  -4  13   -0.17    0.85
   1  -4  14    0.75    1.01
   1  -4  15   -0.79    1.02
   1  -4  16    0.33    1.15
  -2   4  16    2.36    1.27
  -2   4  15    6.07    1.39
  -2   4  14    7.66    1.42
  -2   4  13   -0.10    1.12
  -2   4  13   -0.71    0.87
  -2   4  12    3.42    1.20
  -2   4  12    1.92    0.94
  -2   4  11    6.49    1.26
  -2   4  11    6.49    1.10
  -2   4  10    1.40    0.79
  -2   4  10    0.71    1.01
  -2   4   9    8.02    1.23
  -2   4   9    6.79    1.02
  -2   4   8    1.09    0.70
  -2   4   8    0.24    0.84
  -2   4   7    0.95    0.60
  -2   4   7    0.59    0.77
  -2   4   6   39.47    1.57
  -2   4   6   38.44    1.65
  -2   4   5  121.30    2.94
  -2   4   5  124.72    2.81
  -2   4   4   56.91    1.57
  -2   4   4   59.35    1.76
   2  -4  -3   31.47    0.99
  -2   4   3   31.76    1.03
  -2   4   3   30.31    1.23
   2  -4  -2   21.66    0.82
  -2   4   2   21.22    0.75
  -2   4   2   20.71    1.05
   2  -4  -1   52.12    1.27
  -2   4   1   48.46    1.45
   2  -4   0   86.20    1.65
   2  -4   0   84.49    1.79
   2  -4   1    9.35    0.66
   2  -4   1    8.85    0.58
  -2   4  -1    8.01    0.71
   2  -4   2    0.27    0.27
   2  -4   2   -0.10    0.24
   2  -4   3    0.16    0.26
   2  -4   3   -0.21    0.28
   2  -4   4   47.38    1.56
   2  -4   4   45.26    1.35
   2  -4   5    5.22    0.67
   2  -4   5    4.30    0.51
   2  -4   6   16.14    1.25
   2  -4   6   14.49    0.97
   2  -4   7    0.28    0.60
   2  -4   7    0.48    0.45
   2  -4   8    5.02    0.68
   2  -4   8    5.51    0.93
   2  -4   9   45.36    2.24
   2  -4  10   22.60    1.76
   2  -4  11    0.74    0.86
   2  -4  12    3.36    1.02
   2  -4  13    0.13    0.89
   2  -4  14   -1.18    0.88
   2  -4  15   -1.99    0.87
  -3   4  16   -1.66    1.09
  -3   4  15   -2.72    0.94
  -3   4  14    0.74    1.05
  -3   4  13    8.28    1.49
  -3   4  13    5.86    1.24
  -3   4  12   11.21    1.54
  -3   4  12    8.58    1.28
  -3   4  11   26.31    1.95
  -3   4  10   12.04    1.25
  -3   4  10   13.31    1.40
  -3   4   9   21.52    1.84
  -3   4   9   19.90    1.68
  -3   4   8    3.98    0.88
  -3   4   8    3.54    1.01
  -3   4   7    1.45    0.79
  -3   4   7    2.11    0.70
  -3   4   6    1.62    0.59
  -3   4   6    0.67    0.67
   3  -4  -5   -0.16    0.29
  -3   4   5    0.00    0.47
  -3   4   5   -0.02    0.55
   3  -4  -4    5.43    0.42
  -3   4   4    5.73    0.57
  -3   4   4    4.81    0.67
   3  -4  -3    7.42    0.57
  -3   4   3    7.67    0.75
  -3   4   3    6.62    0.70
   3  -4  -2   71.63    1.54
  -3   4   2   68.67    1.83
   3  -4  -1    4.66    0.39
  -3   4   1    5.34    0.57
   3  -4   0   10.30    0.55
   3  -4   0    8.73    0.64
  -3   4   0    9.49    0.74
   3  -4   1   26.24    0.95
   3  -4   1   25.01    0.86
  -3   4  -1   23.05    0.84
   3  -4   2   35.37    1.13
   3  -4   2   35.98    1.17
  -3   4  -2   32.98    0.89
   3  -4   3    4.41    0.52
   3  -4   3    4.53    0.47
   3  -4   4   32.49    1.21
   3  -4   4   33.65    1.37
   3  -4   5   -0.44    0.39
   3  -4   5    0.20    0.35
   3  -4   6   27.19    1.29
   3  -4   6   26.82    1.47
   3  -4   7   52.30    2.17
   3  -4   7   55.63    1.86
   3  -4   8    9.29    0.90
   3  -4   8   10.87    1.19
   3  -4   9   23.58    1.78
   3  -4  10   11.28    1.33
   3  -4  11    6.00    1.13
   3  -4  12    3.71    1.03
   3  -4  13    8.96    1.45
   3  -4  14    6.87    1.38
   3  -4  15   -0.54    0.98
  -4   4  16   -2.54    1.05
  -4   4  15    2.59    1.31
  -4   4  14    1.11    1.30
  -4   4  14   -0.74    1.02
  -4   4  13    0.34    1.00
  -4   4  13    2.06    1.28
  -4   4  12    1.10    0.96
  -4   4  12    1.00    1.07
  -4   4  11    0.07    0.84
  -4   4  11    1.54    1.05
  -4   4  10   65.52    2.66
  -4   4  10   69.30    2.65
  -4   4   9   31.01    1.91
  -4   4   9   32.64    2.02
   4  -4  -8   41.52    1.40
  -4   4   8   46.41    2.06
  -4   4   8   42.61    2.10
   4  -4  -7   -0.11    0.33
  -4   4   7    0.83    0.71
  -4   4   7    0.61    0.79
   4  -4  -6    1.57    0.33
  -4   4   6    0.76    0.72
  -4   4   6    1.80    0.68
   4  -4  -5   13.79    0.70
  -4   4   5   17.03    1.23
  -4   4   5   15.36    1.17
   4  -4  -4   19.79    0.79
  -4   4   4   19.84    1.16
  -4   4   4   21.52    1.19
   4  -4  -3   56.25    1.33
  -4   4   3   57.24    1.75
   4  -4  -2   10.29    0.60
  -4   4   2    8.67    0.84
   4  -4  -1   47.52    1.24
   4  -4  -1   49.09    1.27
  -4   4   1   47.11    1.45
   4  -4   0   19.83    0.80
   4  -4   0   18.35    0.84
  -4   4   0   19.24    0.89
   4  -4   1   26.65    0.98
   4  -4   1   24.98    1.01
  -4   4  -1   23.76    0.90
   4  -4   2   34.66    1.19
   4  -4   2   35.02    1.20
  -4   4  -2   33.14    0.94
   4  -4   3   71.15    1.98
   4  -4   3   74.41    1.93
   4  -4   4   61.51    1.83
   4  -4   4   64.25    1.97
   4  -4   5    2.14    0.56
   4  -4   5    1.02    0.43
   4  -4   6    4.50    0.63
   4  -4   6    4.25    0.75
   4  -4   7   -0.42    0.53
   4  -4   7   -0.19    0.44
   4  -4   8   17.29    1.60
   4  -4   8   20.85    1.40
   4  -4   9   25.34    1.80
   4  -4  10   17.29    1.67
   4  -4  11    0.52    0.77
   4  -4  12    3.12    1.02
   4  -4  13    0.44    0.92
   4  -4  14    6.34    1.36
   4  -4  15    0.39    1.03
  -5   4  15   -1.96    1.11
  -5   4  14    4.13    1.49
  -5   4  14    0.34    1.11
  -5   4  13    3.49    1.19
  -5   4  13    7.02    1.40
  -5   4  12   13.35    1.56
  -5   4  12   19.74    1.98
  -5   4  11   18.72    1.78
  -5   4  11   11.48    1.42
  -5   4  10    0.95    0.88
  -5   4  10    2.01    1.01
  -5   4   9   30.28    1.89
  -5   4   9   30.26    1.96
  -5   4   8   -0.22    0.84
  -5   4   8   -0.84    0.90
  -5   4   7    4.89    0.97
  -5   4   7    3.49    0.94
   5  -4  -6   47.43    1.21
  -5   4   6   51.87    1.96
  -5   4   6   49.41    1.99
   5  -4  -5   23.24    0.82
  -5   4   5   22.09    1.39
  -5   4   5   22.99    1.41
   5  -4  -4    0.88    0.26
  -5   4   4    1.46    0.61
  -5   4   4    1.41    0.52
   5  -4  -3    5.44    0.73
   5  -4  -3    4.56    0.41
  -5   4   3    3.88    0.68
   5  -4  -2   97.76    2.08
   5  -4  -2  100.84    2.54
   5  -4  -1   23.26    0.95
   5  -4  -1   25.01    0.97
   5  -4  -1   25.91    1.16
   5  -4   0   57.76    1.58
   5  -4   0   56.91    1.55
   5  -4   0   57.98    1.64
   5  -4   1   14.16    0.84
   5  -4   1   13.72    0.82
   5  -4   1   15.32    0.84
   5  -4   2  272.33    5.01
   5  -4   2  262.58    4.91
   5  -4   2  265.46    5.22
   5  -4   3   29.86    0.92
   5  -4   3   30.71    1.31
   5  -4   3   29.28    1.26
   5  -4   4   26.97    1.36
   5  -4   4   25.13    1.26
   5  -4   5    0.88    0.53
   5  -4   5    1.63    0.50
   5  -4   6   10.13    1.03
   5  -4   6    8.95    0.87
   5  -4   7   18.13    1.47
   5  -4   7   21.04    1.40
   5  -4   8   -0.53    0.60
   5  -4   8   -0.40    0.54
   5  -4   9    1.95    0.79
   5  -4  10    2.99    0.95
   5  -4  11   10.58    1.38
   5  -4  12    6.00    1.24
   5  -4  13    5.80    1.29
   5  -4  14    3.97    1.26
   5  -4  15   -1.05    0.96
  -6   4  15    0.27    1.26
  -6   4  14    0.58    1.15
  -6   4  14    0.55    1.25
  -6   4  13    1.28    1.16
  -6   4  13   -2.20    0.91
  -6   4  12   10.36    1.49
  -6   4  12   13.39    1.58
  -6   4  11    6.91    1.27
  -6   4  11    4.44    1.15
  -6   4  10   11.24    1.39
  -6   4  10   15.44    1.53
  -6   4   9   18.54    1.67
  -6   4   9   20.49    1.85
  -6   4   8    4.60    1.10
  -6   4   8    5.03    1.13
  -6   4   7    3.75    0.98
  -6   4   7    3.10    0.97
  -6   4   6   33.33    1.86
  -6   4   6   29.35    1.70
   6  -4  -5    1.17    0.67
   6  -4  -5    0.90    0.28
  -6   4   5   -0.36    0.68
  -6   4   5    0.80    0.65
   6  -4  -4    5.13    0.43
   6  -4  -4    6.69    0.89
  -6   4   4    5.35    0.83
   6  -4  -3   45.04    1.28
   6  -4  -3   47.09    1.77
   6  -4  -2    6.51    0.78
   6  -4  -2    5.66    0.50
   6  -4  -1   87.73    2.20
   6  -4  -1   91.73    2.10
   6  -4  -1   88.96    2.38
   6  -4   0   90.23    2.26
   6  -4   0   93.67    2.22
   6  -4   0   92.41    2.33
   6  -4   1   15.59    0.98
   6  -4   1   16.40    0.94
   6  -4   1   16.05    0.99
   6  -4   2    0.14    0.36
   6  -4   2    1.09    0.38
   6  -4   2    0.57    0.37
   6  -4   3  142.67    2.91
   6  -4   3  140.25    3.40
   6  -4   3  148.76    3.29
   6  -4   4    9.49    0.63
   6  -4   4   10.73    1.01
   6  -4   4   10.26    0.96
   6  -4   5   17.93    1.35
   6  -4   5   16.97    1.32
   6  -4   6   81.43    2.72
   6  -4   6   79.05    2.48
   6  -4   7    4.99    0.93
   6  -4   7    4.31    0.77
   6  -4   8    0.07    0.63
   6  -4   9   -0.81    0.63
   6  -4  10   -0.47    0.69
   6  -4  11    1.27    0.88
   6  -4  12    0.56    0.90
   6  -4  13    3.08    1.13
   6  -4  14    6.76    1.43
  -7   4  15   -0.20    1.25
  -7   4  15    1.78    1.45
  -7   4  14    3.82    1.43
  -7   4  14   -0.20    1.20
  -7   4  13    3.01    1.31
  -7   4  13    4.85    1.37
  -7   4  12    0.26    1.05
  -7   4  12   -1.63    0.98
  -7   4  11   -0.11    1.02
  -7   4  11    2.18    1.09
  -7   4  10   -0.94    0.93
  -7   4  10   -0.57    0.93
  -7   4   9   14.16    1.44
  -7   4   9   14.04    1.46
  -7   4   8    8.85    1.20
  -7   4   8    9.94    1.25
  -7   4   7    4.57    1.07
  -7   4   7    4.72    1.10
   7  -4  -6   73.42    2.64
  -7   4   6   73.81    2.65
  -7   4   6   80.21    2.68
   7  -4  -5   49.20    2.08
   7  -4  -5   48.77    1.28
  -7   4   5   48.09    2.03
  -7   4   5   46.64    2.05
   7  -4  -4    0.93    0.32
   7  -4  -4    1.07    0.71
   7  -4  -3   19.69    0.95
   7  -4  -3   19.51    1.33
   7  -4  -2   22.34    1.03
   7  -4  -2   22.12    1.31
   7  -4  -1   19.10    1.08
   7  -4  -1   20.54    1.05
   7  -4  -1   17.38    1.13
   7  -4   0   50.63    1.71
   7  -4   0   51.70    1.63
   7  -4   0   47.87    1.67
   7  -4   1   10.24    0.89
   7  -4   1    9.72    0.93
   7  -4   1    9.01    0.82
   7  -4   2    0.68    0.42
   7  -4   2    0.53    0.41
   7  -4   2   -0.52    0.43
   7  -4   3   54.16    1.92
   7  -4   3   54.00    1.94
   7  -4   3   53.46    1.57
   7  -4   4    0.83    0.52
   7  -4   4    2.15    0.61
   7  -4   4    1.63    0.47
   7  -4   5    9.03    0.93
   7  -4   5   10.09    1.07
   7  -4   6   14.78    1.41
   7  -4   6   11.37    1.05
   7  -4   7   82.58    2.95
   7  -4   7   84.43    2.75
   7  -4   8    9.32    1.21
   7  -4   9   -0.79    0.62
   7  -4  10   -0.28    0.72
   7  -4  11    3.69    1.06
   7  -4  12   14.44    1.76
   7  -4  13    1.50    1.05
   7  -4  14   -1.62    0.85
  -8   4  15    2.81    1.48
  -8   4  14    1.20    1.34
  -8   4  14    6.17    1.54
  -8   4  13    2.63    1.30
  -8   4  13   -1.66    1.16
  -8   4  12    0.90    1.10
  -8   4  12   -1.69    1.06
  -8   4  11    0.57    1.01
  -8   4  11   -0.74    1.03
  -8   4  10    0.37    1.01
  -8   4  10    1.09    1.08
  -8   4   9    4.02    1.16
  -8   4   9    3.24    1.07
  -8   4   8    2.49    1.02
  -8   4   8    2.60    0.98
  -8   4   7   25.33    2.04
  -8   4   7   23.54    1.80
   8  -4  -6   24.52    1.77
  -8   4   6   21.22    1.80
  -8   4   6   24.05    1.87
   8  -4  -5   13.20    1.34
   8  -4  -5   13.62    0.81
   8  -4  -4   21.39    0.98
   8  -4  -4   22.97    1.58
   8  -4  -3   27.39    1.16
   8  -4  -3   26.44    1.59
   8  -4  -2   40.32    1.42
   8  -4  -2   39.50    1.80
   8  -4  -1    2.39    0.68
   8  -4  -1    2.56    0.55
   8  -4  -1    2.23    0.49
   8  -4   0   28.78    1.39
   8  -4   0   27.13    1.42
   8  -4   0   28.44    1.32
   8  -4   1   14.06    1.10
   8  -4   1   12.76    1.08
   8  -4   1   12.85    1.05
   8  -4   2    4.96    0.72
   8  -4   2    4.66    0.71
   8  -4   2    4.33    0.69
   8  -4   3   31.35    1.59
   8  -4   3   31.95    1.56
   8  -4   3   31.14    1.30
   8  -4   4  130.92    2.91
   8  -4   4  135.26    3.42
   8  -4   4  131.27    3.56
   8  -4   5   17.12    1.44
   8  -4   5   15.50    1.32
   8  -4   6   45.77    1.99
   8  -4   6   43.59    2.11
   8  -4   7   21.21    1.64
   8  -4   8   10.32    1.29
   8  -4   9    1.09    0.80
   8  -4  10    0.55    0.79
   8  -4  11    7.60    1.35
   8  -4  12    1.67    1.04
   8  -4  13    7.89    1.48
  -9   4  14    1.82    1.34
  -9   4  14   -2.72    1.23
  -9   4  13    3.96    1.39
  -9   4  13    2.74    1.43
  -9   4  12    3.24    1.36
  -9   4  12    8.01    1.53
  -9   4  11    1.62    1.10
  -9   4  11   -1.50    1.05
  -9   4  10    1.12    1.03
  -9   4  10   -0.57    1.10
  -9   4   9   11.25    1.42
  -9   4   9   10.18    1.42
  -9   4   8   23.43    2.05
  -9   4   8   25.63    1.90
   9  -4  -7   12.47    1.45
  -9   4   7   10.01    1.28
  -9   4   7    9.58    1.28
   9  -4  -6   -1.17    0.79
  -9   4   6   -0.03    0.87
   9  -4  -5   31.39    1.93
   9  -4  -4   14.76    1.48
   9  -4  -4   12.37    0.95
   9  -4  -3   12.27    0.95
   9  -4  -3   10.55    1.21
   9  -4  -2   36.56    1.85
   9  -4  -2   38.21    1.50
   9  -4  -1    2.49    0.78
   9  -4  -1    2.70    0.60
   9  -4  -1    1.94    0.54
   9  -4   0   10.79    1.08
   9  -4   0   12.73    1.17
   9  -4   0   11.47    0.94
   9  -4   1    1.76    0.57
   9  -4   1    2.32    0.58
   9  -4   1    1.91    0.71
   9  -4   2    3.65    0.72
   9  -4   2    3.83    0.72
   9  -4   2    3.56    0.74
   9  -4   3    7.65    0.90
   9  -4   3    8.92    1.00
   9  -4   3   11.15    1.02
   9  -4   4    5.01    0.82
   9  -4   4    4.93    0.69
   9  -4   4    3.71    0.77
   9  -4   5   10.17    1.12
   9  -4   5   10.01    1.05
   9  -4   6   22.82    1.69
   9  -4   7   61.03    2.64
   9  -4   8    0.28    0.72
   9  -4   9   -0.06    0.69
   9  -4  10    1.42    0.91
   9  -4  11    0.07    0.85
   9  -4  12    1.34    1.04
   9  -4  13   -0.97    0.88
 -10   4  14    7.03    1.62
 -10   4  13    9.52    1.78
 -10   4  12    1.39    1.22
 -10   4  12   -1.04    1.20
 -10   4  11   -2.00    1.14
 -10   4  11    1.60    1.17
 -10   4  10    0.37    1.01
 -10   4  10   -0.08    1.10
 -10   4   9    6.75    1.30
 -10   4   9    4.87    1.28
 -10   4   8   -0.12    0.94
 -10   4   8   -0.55    0.99
  10  -4  -7   15.26    1.65
 -10   4   7   14.35    1.51
 -10   4   7   14.31    1.41
  10  -4  -6   17.33    1.72
 -10   4   6   17.91    1.77
  10  -4  -5    5.53    1.11
  10  -4  -4   12.54    0.97
  10  -4  -4   11.49    1.36
  10  -4  -3    2.61    0.91
  10  -4  -3    2.59    0.54
  10  -4  -2    0.04    0.44
  10  -4  -2   -0.12    0.74
  10  -4  -1    2.61    0.88
  10  -4  -1    2.73    0.61
  10  -4  -1    1.65    0.62
  10  -4   0   55.16    1.99
  10  -4   0   61.73    2.22
  10  -4   0   54.53    2.19
  10  -4   1    9.19    1.07
  10  -4   1    9.25    0.94
  10  -4   1    8.57    0.99
  10  -4   2   -0.17    0.49
  10  -4   2    0.85    0.64
  10  -4   2   -0.51    0.51
  10  -4   3    1.11    0.61
  10  -4   3    0.27    0.50
  10  -4   3    0.14    0.59
  10  -4   4   13.05    1.22
  10  -4   4   14.48    1.36
  10  -4   5    3.17    0.83
  10  -4   6    0.41    0.68
  10  -4   7   13.02    1.44
  10  -4   8    2.22    0.91
  10  -4   9   14.38    1.63
  10  -4  10   13.60    1.65
  10  -4  11    8.13    1.48
  10  -4  12    4.28    1.26
 -11   4  13    6.00    1.55
 -11   4  12    8.11    1.58
 -11   4  12    3.99    1.50
 -11   4  11    8.57    1.68
 -11   4  11   12.63    1.73
 -11   4  10   13.04    1.72
 -11   4  10   17.98    1.82
 -11   4   9   -0.63    1.08
 -11   4   9    2.25    1.10
  11  -4  -8   -0.83    0.88
 -11   4   8   -0.68    0.95
 -11   4   8   -0.53    0.94
  11  -4  -7    6.10    1.28
 -11   4   7    7.08    1.27
 -11   4   7    6.84    1.19
  11  -4  -6    3.62    1.10
  11  -4  -5    0.89    0.88
  11  -4  -4   -0.19    0.78
  11  -4  -3   39.01    1.58
  11  -4  -3   36.21    2.01
  11  -4  -2   59.79    2.03
  11  -4  -2   60.18    2.42
  11  -4  -1    8.54    0.89
  11  -4  -1    9.58    1.21
  11  -4  -1    9.92    1.04
  11  -4   0    1.40    0.61
  11  -4   0    2.00    0.82
  11  -4   0    2.16    0.64
  11  -4   1    1.19    0.61
  11  -4   1    1.74    0.61
  11  -4   1    2.24    0.79
  11  -4   2    1.56    0.71
  11  -4   2   -0.06    0.56
  11  -4   2    1.49    0.63
  11  -4   3   -0.17    0.53
  11  -4   3    0.74    0.64
  11  -4   4   -0.40    0.50
  11  -4   5    5.65    1.01
  11  -4   6    9.40    1.23
  11  -4   7    2.63    0.92
  11  -4   8    2.53    0.95
  11  -4   9    0.05    0.79
  11  -4  10    0.67    0.86
  11  -4  11    2.39    1.04
 -12   4  12    3.00    1.36
 -12   4  11    4.92    1.41
 -12   4  11    2.28    1.46
 -12   4  10    4.77    1.45
 -12   4  10    7.55    1.48
 -12   4   9    1.10    1.17
 -12   4   9    2.67    1.21
  12  -4  -8   11.93    1.63
 -12   4   8    9.38    1.47
 -12   4   8   12.13    1.57
  12  -4  -7   -0.85    0.85
 -12   4   7    0.56    0.94
 -12   4   7    1.64    1.05
  12  -4  -6    0.70    0.97
  12  -4  -5    0.52    0.88
  12  -4  -4   12.84    1.54
  12  -4  -3    3.76    1.09
  12  -4  -2   33.48    1.98
  12  -4  -1    0.03    0.55
  12  -4  -1    1.81    0.86
  12  -4   0   31.27    1.79
  12  -4   0   30.08    1.79
  12  -4   1   20.91    1.56
  12  -4   1   18.35    1.51
  12  -4   2    0.52    0.73
  12  -4   2    0.22    0.57
  12  -4   3    0.70    0.62
  12  -4   4    7.45    1.13
  12  -4   5    0.39    0.60
  12  -4   6    0.33    0.72
  12  -4   7    0.74    0.72
  12  -4   8   -0.17    0.75
  12  -4   9    9.75    1.47
  12  -4  10    4.16    1.24
  12  -4  11    2.27    1.15
 -13   4  12   -0.27    1.22
 -13   4  11    0.41    1.18
 -13   4  10    1.40    1.19
 -13   4  10   -0.82    1.29
 -13   4   9   -0.51    1.15
 -13   4   9    1.09    1.13
  13  -4  -8   11.23    1.72
 -13   4   8   14.21    1.72
 -13   4   8   12.01    1.60
  13  -4  -7    8.35    1.48
 -13   4   7    8.66    1.40
 -13   4   7    8.37    1.44
  13  -4  -6   12.30    1.63
  13  -4  -5    2.02    1.06
  13  -4  -4    1.78    1.01
  13  -4  -3    7.57    1.29
  13  -4  -2    8.12    1.26
  13  -4  -1   -0.06    0.63
  13  -4  -1    0.70    0.83
  13  -4   0    2.21    0.93
  13  -4   0    1.16    0.68
  13  -4   1   24.33    1.72
  13  -4   1   23.19    1.68
  13  -4   2   18.57    1.56
  13  -4   2   14.31    1.42
  13  -4   3   10.97    1.31
  13  -4   4    4.28    0.94
  13  -4   5    1.25    0.78
  13  -4   6    1.98    0.84
  13  -4   7    0.35    0.83
  13  -4   8    0.15    0.83
  13  -4   9   -0.38    0.78
  13  -4  10    4.30    1.24
 -14   4  11    2.11    1.26
 -14   4  10   15.17    1.91
 -14   4   9    4.61    1.48
 -14   4   9   10.38    1.66
  14  -4  -8    1.71    1.22
 -14   4   8    6.14    1.43
 -14   4   8    4.47    1.32
  14  -4  -7   -0.47    1.02
 -14   4   7    1.24    1.16
 -14   4   7    0.48    1.04
  14  -4  -6    1.16    1.10
  14  -4  -5    0.00    0.95
  14  -4  -4    1.38    1.03
  14  -4  -3   -0.07    0.89
  14  -4  -2   11.96    1.52
  14  -4  -1    1.05    0.86
  14  -4   0    0.25    0.69
  14  -4   0    1.34    0.93
  14  -4   1   11.72    1.34
  14  -4   1   11.72    1.37
  14  -4   2    0.00    0.67
  14  -4   3   -0.50    0.63
  14  -4   4   13.88    1.55
  14  -4   5    3.32    1.02
  14  -4   6   10.03    1.40
  14  -4   7   -0.07    0.74
  14  -4   8    0.10    0.82
  14  -4   9    1.86    1.03
 -15   4  10    0.41    1.25
 -15   4   9    6.39    1.58
  15  -4  -8    7.44    1.65
 -15   4   8   10.88    1.69
 -15   4   8    8.28    1.51
  15  -4  -7    1.37    1.26
 -15   4   7    2.97    1.30
 -15   4   7    3.87    1.32
  15  -4  -6    3.59    1.36
  15  -4  -5    0.63    1.06
  15  -4  -4   -0.78    0.99
  15  -4  -3    0.32    1.00
  15  -4  -2    0.33    0.96
  15  -4  -1    0.36    0.93
  15  -4   0    2.96    1.07
  15  -4   0    4.24    1.02
  15  -4   1    6.25    1.10
  15  -4   2    8.24    1.23
  15  -4   3    4.19    1.00
  15  -4   4    5.39    1.13
  15  -4   5    0.61    0.78
  15  -4   6    6.78    1.29
  15  -4   7    3.48    1.12
 -16   4   8    1.58    1.29
  16  -4  -7    0.49    1.28
 -16   4   7    0.54    1.16
 -16   4   7    0.59    1.22
  16  -4  -6    2.41    1.31
  16  -4  -5    7.72    1.57
  16  -4  -4   12.13    1.76
  16  -4  -3    3.04    1.24
  16  -4  -2    4.61    1.31
  16  -4  -1   -0.05    1.01
  16  -4   0    1.64    1.02
  16  -4   0   -0.11    0.83
  16  -4   1   -0.12    0.78
  16  -4   2    5.51    1.11
  16  -4   3    0.71    0.83
  16  -4   4   13.70    1.64
  16  -4   5    2.25    0.97
  16  -4   6    0.56    0.88
  17  -4  -6    2.78    1.41
 -17   4   6    4.11    1.37
  17  -4  -5   -0.34    1.13
  17  -4  -4    2.40    1.31
  17  -4  -3    2.28    1.23
  17  -4  -2    9.89    1.62
  17  -4  -1    0.44    1.12
  17  -4   1    3.03    1.03
  17  -4   2   -0.24    0.79
  17  -4   3    0.45    0.87
  17  -4   4   -0.22    0.86
  18  -4  -2    0.89    1.26
  17   5   3    1.04    0.98
  17   5   2    0.54    1.00
  17   5   2    0.73    0.93
  17   5   1    0.81    1.00
  17   5   0    2.19    1.10
  17   5  -1    0.83    1.02
  17   5  -2   -0.84    0.94
  17   5  -3    2.66    1.19
  17   5  -4    2.35    1.16
  17   5  -5   12.73    1.83
  17   5  -6    2.86    1.23
  16   5   5    5.31    1.25
  16   5   4    1.32    0.92
  16   5   3    3.53    1.11
  16   5   3    3.37    1.15
  16   5   2    1.77    1.03
  16   5   2    2.02    1.04
  16   5   1    6.15    1.25
  16   5   1    6.07    1.32
  16   5   0    2.59    1.07
  16   5  -1    6.76    1.34
  16   5  -2    2.39    1.11
  16   5  -3    2.50    1.15
  16   5  -4    0.99    1.02
  16   5  -5    1.64    1.08
  16   5  -6    4.01    1.28
  16   5  -7    3.48    1.24
 -16  -5   8   -0.40    1.37
  16   5  -8    0.81    1.05
  15   5   7    1.95    0.96
  15   5   6    0.10    0.81
  15   5   5   38.16    2.50
  15   5   4    0.71    0.80
  15   5   3    1.01    1.02
  15   5   3    0.27    0.81
  15   5   2   -0.39    0.76
  15   5   2   -1.11    0.84
  15   5   1    5.12    1.23
  15   5   1    4.23    1.06
  15   5   0   -0.86    0.82
  15   5  -1    1.39    0.94
  15   5  -2    5.19    1.24
  15   5  -3    0.49    0.89
  15   5  -4    4.81    1.22
  15   5  -5    6.90    1.34
  15   5  -6    1.02    0.97
  15   5  -7    0.73    0.99
 -15  -5   8    2.66    1.51
  15   5  -8    2.26    1.15
 -15  -5   9    7.14    1.78
  15   5  -9    9.76    1.61
  15   5 -10   -0.03    1.04
  14   5   8    1.69    0.94
  14   5   7   11.18    1.56
  14   5   6   -0.09    0.77
  14   5   5    1.38    0.85
  14   5   4    4.01    1.09
  14   5   4    4.30    1.08
  14   5   3   11.14    1.42
  14   5   3   12.75    1.52
  14   5   2   10.40    1.38
  14   5   2   10.26    1.41
  14   5   1    1.26    0.96
  14   5   1    2.23    0.89
  14   5   0    2.64    1.01
  14   5  -1   -0.03    0.86
  14   5  -2    0.68    0.88
  14   5  -3    6.16    1.25
  14   5  -4    7.71    1.36
  14   5  -5    2.85    1.06
  14   5  -6    2.17    0.99
  14   5  -7   20.22    1.91
 -14  -5   8    0.17    1.30
  14   5  -8    0.54    0.95
 -14  -5   9    3.84    1.55
  14   5  -9    2.84    1.16
 -14  -5  10    1.44    1.55
  14   5 -10    2.99    1.16
 -14  -5  11    0.72    1.62
  14   5 -11    1.45    1.15
  13   5   9    1.33    1.00
  13   5   8    2.57    1.06
  13   5   7    0.16    0.81
  13   5   6    0.22    0.76
  13   5   5    4.77    1.08
  13   5   5    6.71    1.22
  13   5   4   -0.36    0.77
  13   5   4   -0.20    0.62
  13   5   3    2.50    0.96
  13   5   3    1.61    0.78
  13   5   2    2.18    0.91
  13   5   2    1.87    0.80
  13   5   1    6.02    1.09
  13   5   1    7.75    1.26
  13   5   0    9.74    1.33
  13   5   0    8.04    1.18
  13   5  -1   20.34    1.83
  13   5  -2    0.05    0.87
  13   5  -3   -0.09    0.82
  13   5  -4    0.84    0.87
  13   5  -5    0.91    0.88
  13   5  -6    0.56    0.85
 -13  -5   7    5.44    1.43
  13   5  -7    5.94    1.26
 -13  -5   8    0.12    1.19
  13   5  -8    0.95    0.97
 -13  -5   9   16.56    2.10
  13   5  -9   18.52    1.85
 -13  -5  10    0.05    1.44
  13   5 -10    1.05    0.99
 -13  -5  11    1.40    1.61
  13   5 -11    3.12    1.21
  13   5 -12    1.98    1.18
  12   5  10    0.52    0.92
  12   5   9    0.94    0.97
  12   5   8    1.75    0.92
  12   5   7   14.46    1.65
  12   5   6    0.03    0.69
  12   5   5   -0.47    0.60
  12   5   5    0.15    0.77
  12   5   4    1.28    0.74
  12   5   4    0.91    0.81
  12   5   3   10.17    1.28
  12   5   3    9.88    1.30
  12   5   2    7.95    1.20
  12   5   2    7.96    1.13
  12   5   1   18.71    1.60
  12   5   1   18.86    1.63
  12   5   0    3.67    0.86
  12   5   0    4.12    0.99
  12   5  -1    0.04    0.75
  12   5  -2    2.67    0.96
  12   5  -3   52.46    2.50
  12   5  -4    0.66    0.80
  12   5  -5    1.99    0.94
  12   5  -6    0.45    0.80
 -12  -5   7    5.27    1.37
  12   5  -7    3.79    1.04
 -12  -5   8    5.87    1.46
  12   5  -8    5.39    1.18
 -12  -5   9   -0.40    1.18
  12   5  -9    1.43    0.93
 -12  -5  10    1.54    1.41
  12   5 -10    1.68    1.00
 -12  -5  11    2.55    1.63
  12   5 -11    4.34    1.26
 -12  -5  12   -1.29    1.51
  12   5 -12   -0.84    0.91
  11   5  11    6.12    1.42
  11   5  10    0.46    0.86
  11   5   9    3.27    1.07
  11   5   8    2.82    0.99
  11   5   7    4.95    1.06
  11   5   6    1.55    0.80
  11   5   6    0.80    0.83
  11   5   5    0.67    0.75
  11   5   5   -0.57    0.61
  11   5   4   15.33    1.54
  11   5   4   15.62    1.49
  11   5   3    2.25    0.85
  11   5   3    2.78    0.78
  11   5   2    2.39    0.74
  11   5   2    1.66    0.80
  11   5   1   27.27    1.75
  11   5   1   25.55    1.70
  11   5   0    1.89    0.72
  11   5   0    1.71    0.80
  11   5  -1   21.26    1.59
  11   5  -2   20.16    1.68
  11   5  -3    7.64    1.16
  11   5  -4    3.74    0.96
  11   5  -5   18.16    1.61
  11   5  -6    7.44    1.20
 -11  -5   7    0.87    1.12
  11   5  -7    1.09    0.84
 -11  -5   8   -0.13    1.08
  11   5  -8    0.95    0.85
 -11  -5   9   13.64    1.86
  11   5  -9   13.46    1.55
 -11  -5  10   -1.51    1.23
  11   5 -10    0.65    0.85
 -11  -5  11    2.26    1.53
  11   5 -11    5.92    1.27
 -11  -5  12    1.85    1.62
  11   5 -12    3.41    1.19
 -11  -5  13    0.47    1.58
  11   5 -13    0.61    1.09
  10   5  12    0.84    1.04
  10   5  11    2.31    1.08
  10   5  10    6.16    1.27
  10   5   9    4.95    1.15
  10   5   8   -0.28    0.66
  10   5   7   31.07    2.06
  10   5   6   10.32    1.28
  10   5   6   11.85    1.28
  10   5   5   -0.20    0.69
  10   5   5    0.03    0.58
  10   5   4    0.67    0.73
  10   5   4    1.42    0.63
  10   5   3    7.42    1.05
  10   5   3    4.70    0.87
  10   5   2    0.34    0.55
  10   5   2   -0.24    0.65
  10   5   1    1.90    0.71
  10   5   1    2.10    0.79
  10   5   0   18.73    1.55
  10   5   0   17.91    1.50
  10   5  -1   17.80    1.50
  10   5  -2    0.72    0.69
  10   5  -3   43.54    2.12
  10   5  -4    3.39    0.92
  10   5  -5   16.48    1.51
  10   5  -6    2.82    0.89
 -10  -5   7    2.96    1.18
  10   5  -7    3.65    0.97
 -10  -5   8    2.88    1.26
  10   5  -8    2.27    0.88
 -10  -5   9    0.56    1.20
  10   5  -9    1.15    0.85
 -10  -5  10   -0.15    1.28
  10   5 -10    0.59    0.86
 -10  -5  11   13.86    2.01
  10   5 -11   13.75    1.61
 -10  -5  12   -0.86    1.40
  10   5 -12    0.23    0.92
 -10  -5  13    8.01    1.90
  10   5 -13    8.19    1.52
 -10  -5  14   -0.92    1.54
   9   5  13   -0.20    0.99
   9   5  12    0.65    1.02
   9   5  11    5.30    1.28
   9   5  10    3.49    1.07
   9   5   9    3.77    1.01
   9   5   8    4.63    1.04
   9   5   7   22.72    1.81
   9   5   7   21.65    1.72
   9   5   6    0.29    0.63
   9   5   6    0.40    0.74
   9   5   5   63.51    2.50
   9   5   5   64.27    2.39
   9   5   4    0.45    0.57
   9   5   4    1.28    0.75
   9   5   3   13.52    1.35
   9   5   3   14.74    1.34
   9   5   2   -0.60    0.50
   9   5   2    0.91    0.71
   9   5   1    0.06    0.52
   9   5   1    0.53    0.67
   9   5   0    0.62    0.56
   9   5   0    0.40    0.65
   9   5  -1    9.59    1.11
   9   5  -2    1.18    0.70
   9   5  -3   14.81    1.39
   9   5  -4   20.92    1.61
   9   5  -5   27.16    1.72
   9   5  -6    2.90    0.87
  -9  -5   7   -0.49    0.90
   9   5  -7   -0.38    0.65
  -9  -5   8   -0.41    1.04
   9   5  -8    0.25    0.73
  -9  -5   9    5.57    1.40
   9   5  -9    7.12    1.16
  -9  -5  10    3.72    1.40
   9   5 -10    4.26    1.07
  -9  -5  11    1.86    1.38
   9   5 -11    1.61    0.93
  -9  -5  12    5.03    1.67
   9   5 -12    6.50    1.30
  -9  -5  13    1.30    1.49
   9   5 -13    2.78    1.19
  -9  -5  14   -1.79    1.42
   8   5  13    1.30    1.09
   8   5  12    7.20    1.47
   8   5  11    3.91    1.13
   8   5  10   -0.74    0.70
   8   5   9    0.03    0.74
   8   5   8    4.63    1.00
   8   5   8    4.31    1.00
   8   5   7  109.94    3.23
   8   5   7  107.19    3.52
   8   5   6    3.11    0.78
   8   5   6    3.06    0.86
   8   5   5    5.87    0.97
   8   5   5    3.98    0.83
   8   5   4   -0.27    0.50
   8   5   4    0.68    0.72
   8   5   3   23.17    1.53
   8   5   3   22.62    1.51
   8   5   2    0.41    0.50
   8   5   2    0.67    0.65
   8   5   1    0.64    0.51
   8   5   1    0.12    0.58
   8   5   0    0.50    0.49
   8   5   0    1.07    0.63
   8   5  -1   13.46    1.24
   8   5  -2   11.51    1.14
   8   5  -3   47.91    2.00
   8   5  -4    3.04    0.80
   8   5  -5   15.20    1.36
  -8  -5   6    2.43    1.10
   8   5  -6    3.22    0.87
  -8  -5   7   84.23    3.29
   8   5  -7   75.68    2.72
  -8  -5   8    2.59    1.14
   8   5  -8    1.45    0.77
  -8  -5   9   17.00    1.81
   8   5  -9   17.74    1.54
  -8  -5  10   12.58    1.76
   8   5 -10   14.24    1.49
  -8  -5  11   -1.73    1.16
   8   5 -11    0.14    0.81
  -8  -5  12    5.55    1.59
   8   5 -12    7.58    1.31
  -8  -5  13    2.97    1.57
  -8  -5  13    3.59    1.14
  -8  -5  14   -1.83    1.33
   7   5  14    3.15    1.28
   7   5  13    8.79    1.56
   7   5  12   -0.10    0.87
   7   5  11    0.25    0.86
   7   5  10    0.92    0.85
   7   5   9    2.42    0.88
   7   5   8    7.42    1.11
   7   5   8    7.83    1.14
   7   5   7    8.56    1.11
   7   5   7    8.82    1.13
   7   5   6    8.63    1.06
   7   5   6    8.26    1.09
   7   5   5   80.88    2.60
   7   5   5   79.55    2.71
   7   5   4   97.01    2.81
   7   5   4   94.65    2.90
   7   5   3   17.80    1.31
   7   5   3   18.68    1.38
   7   5   2    2.88    0.63
   7   5   2    3.18    0.71
   7   5   1   15.06    1.19
   7   5   1   14.93    1.26
   7   5   0    2.93    0.68
   7   5   0    1.81    0.53
   7   5  -1   -0.25    0.50
   7   5  -2    0.43    0.55
   7   5  -3   11.39    1.15
   7   5  -4   19.66    1.36
  -7  -5   5   31.65    1.09
   7   5  -5   29.75    1.70
  -7  -5   6    0.23    0.94
   7   5  -6    1.39    0.74
  -7  -5   7    1.74    1.14
   7   5  -7    2.46    0.79
  -7  -5   8    0.79    1.02
   7   5  -8   -0.47    0.62
  -7  -5   9    8.16    1.43
   7   5  -9    7.72    1.12
  -7  -5  10    2.68    1.25
   7   5 -10    2.28    0.82
  -7  -5  11   16.75    1.93
   7   5 -11   15.91    1.55
  -7  -5  12   -1.62    1.16
   7   5 -12    0.38    0.87
  -7  -5  13    1.53    1.42
  -7  -5  14   -1.02    1.36
  -7  -5  15    4.33    1.75
   6   5  14   -0.43    0.94
   6   5  13   34.56    2.51
   6   5  12    7.46    1.36
   6   5  11    0.27    0.81
   6   5  10    0.50    0.75
   6   5   9   -1.51    0.78
   6   5   9    0.38    0.69
   6   5   8    1.39    0.86
   6   5   8    1.33    0.74
   6   5   7   18.22    1.53
   6   5   7   16.24    1.56
   6   5   6    4.16    0.82
   6   5   6    3.76    0.91
   6   5   5    0.28    0.69
   6   5   5    0.09    0.49
   6   5   4    4.94    0.74
   6   5   4    5.31    0.84
   6   5   3   35.93    1.55
   6   5   3   31.73    1.52
   6   5   2    3.03    0.65
   6   5   2    2.52    0.54
   6   5   1   69.03    2.13
   6   5   1   69.86    2.15
   6   5   0   33.26    1.51
   6   5   0   35.17    1.51
   6   5  -1    3.68    0.67
   6   5  -2   24.12    1.31
   6   5  -3   48.70    1.83
   6   5  -4   33.47    1.58
  -6  -5   5   26.35    0.93
  -6  -5   5   27.63    1.93
   6   5  -5   25.53    1.48
  -6  -5   6    2.56    1.00
   6   5  -6    1.94    0.70
  -6  -5   7  155.43    4.43
   6   5  -7  147.44    3.83
  -6  -5   8    4.15    1.22
   6   5  -8    3.59    0.85
  -6  -5   9    1.06    1.02
   6   5  -9    0.97    0.70
  -6  -5  10   -0.08    1.06
   6   5 -10    0.33    0.69
  -6  -5  11    3.78    1.32
   6   5 -11    3.53    0.97
  -6  -5  12   -0.93    1.12
   6   5 -12   -1.75    0.73
  -6  -5  13    1.31    1.34
  -6  -5  14    1.05    1.39
  -6  -5  15   -0.18    1.34
   5   5  14    0.86    1.02
   5   5  13    4.97    1.27
   5   5  12    1.67    0.97
   5   5  11    4.90    1.10
   5   5  10    0.52    0.74
   5   5   9   33.21    1.98
   5   5   9   30.67    1.92
   5   5   8    1.83    0.74
   5   5   8    0.56    0.86
   5   5   7    3.09    0.94
   5   5   7    2.81    0.73
   5   5   6    0.71    0.55
   5   5   6    1.10    0.80
   5   5   5    0.39    0.68
   5   5   5    0.34    0.47
   5   5   4    5.28    0.81
   5   5   4    5.92    0.72
   5   5   3   67.39    2.09
   5   5   3   66.28    2.06
   5   5   2   76.26    2.19
   5   5   2   75.00    2.16
   5   5   1   20.39    1.16
   5   5   1   21.04    1.11
   5   5   0    8.13    0.74
   5   5   0    9.20    0.91
   5   5  -1    3.73    0.62
   5   5  -2   13.88    1.04
   5   5  -3   -0.19    0.41
  -5  -5   4   23.53    0.93
   5   5  -4   25.29    1.28
  -5  -5   5   17.63    1.60
  -5  -5   5   16.78    0.75
   5   5  -5   16.54    1.23
  -5  -5   6    2.66    0.92
   5   5  -6    1.36    0.61
  -5  -5   7    4.27    1.11
   5   5  -7    4.33    0.80
  -5  -5   8   45.29    2.59
   5   5  -8   38.85    1.80
  -5  -5   9   40.86    2.46
   5   5  -9   37.76    1.80
  -5  -5  10    1.55    1.09
   5   5 -10    0.87    0.70
  -5  -5  11   18.96    1.89
   5   5 -11   21.62    1.61
  -5  -5  12   -0.03    1.10
  -5  -5  13    1.37    1.27
  -5  -5  14   -0.03    1.23
  -5  -5  15    2.12    1.42
   4   5  15    0.17    1.02
   4   5  14   -0.14    0.98
   4   5  13   43.27    2.65
   4   5  12    0.09    0.84
   4   5  11    1.30    0.85
   4   5  10   -0.08    0.95
   4   5  10    0.76    0.73
   4   5   9    0.94    0.93
   4   5   9    0.49    0.68
   4   5   8    0.55    0.93
   4   5   8    0.36    0.65
   4   5   7    8.78    1.16
   4   5   7    7.11    0.93
   4   5   6    5.42    0.96
   4   5   6    4.97    0.78
   4   5   5    1.80    0.73
   4   5   5    2.93    0.60
   4   5   4    2.46    0.51
   4   5   4    3.10    0.70
   4   5   3  316.98    6.19
   4   5   3  310.09    6.08
   4   5   2    1.00    0.51
   4   5   2   -0.14    0.29
   4   5   1   38.99    1.45
   4   5   1   42.14    1.42
   4   5   0    7.89    0.75
   4   5   0    7.70    0.72
   4   5  -1   85.05    2.22
   4   5  -2    0.00    0.40
  -4  -5   3  113.73    2.31
   4   5  -3  114.22    2.77
  -4  -5   4    2.50    0.34
  -4  -5   4    2.70    0.70
   4   5  -4    1.93    0.52
  -4  -5   5   11.97    1.10
  -4  -5   5   14.66    0.69
   4   5  -5   13.39    1.05
  -4  -5   6    1.55    0.28
  -4  -5   6    2.72    0.87
   4   5  -6    0.80    0.54
  -4  -5   7   13.18    1.39
  -4  -5   7   13.69    0.69
   4   5  -7   13.92    1.12
  -4  -5   8    3.67    1.13
   4   5  -8    2.44    0.71
  -4  -5   9    4.50    1.20
   4   5  -9    7.03    0.96
  -4  -5  10    1.54    1.02
   4   5 -10    0.65    0.73
  -4  -5  11   25.28    2.28
   4   5 -11   29.64    1.74
  -4  -5  12    1.53    1.14
  -4  -5  13    9.54    1.61
  -4  -5  14   -0.59    1.12
  -4  -5  15   -0.37    1.24
   3   5  15    3.21    1.22
   3   5  14   -0.11    0.98
   3   5  13   -0.74    0.84
   3   5  12    8.94    1.35
   3   5  11    9.45    1.30
   3   5  10    0.81    0.74
   3   5  10   -0.06    0.98
   3   5   9   70.63    2.67
   3   5   9   66.89    2.61
   3   5   8    3.44    0.79
   3   5   8    3.38    1.01
   3   5   7    2.79    0.91
   3   5   7    2.47    0.69
   3   5   6   -0.01    0.74
   3   5   6   -0.17    0.47
   3   5   5   16.80    1.35
   3   5   5   16.29    1.07
   3   5   4    2.68    0.68
   3   5   4    3.12    0.51
   3   5   3    3.44    0.65
   3   5   3    2.36    0.42
   3   5   2   54.20    1.69
   3   5   2   51.43    1.50
   3   5   1   20.92    0.93
   3   5   1   18.76    1.04
   3   5   0   10.16    0.72
   3   5   0   10.10    0.84
   3   5  -1   12.97    0.86
   3   5  -2  116.37    2.67
  -3  -5   3   64.00    1.51
  -3  -5   3   64.97    1.94
   3   5  -3   63.40    1.79
  -3  -5   4    0.02    0.53
  -3  -5   4    0.29    0.26
   3   5  -4    0.37    0.39
  -3  -5   5  108.90    3.00
  -3  -5   5  106.73    2.12
   3   5  -5  106.48    2.61
  -3  -5   6    2.66    0.81
  -3  -5   6    2.07    0.32
   3   5  -6    1.29    0.49
  -3  -5   7    1.00    0.88
  -3  -5   7    0.09    0.28
   3   5  -7   -0.42    0.47
  -3  -5   8    0.90    0.34
  -3  -5   8    0.82    0.91
   3   5  -8    0.18    0.57
  -3  -5   9   73.34    3.03
   3   5  -9   75.61    2.35
  -3  -5  10    8.54    1.29
   3   5 -10   11.02    1.09
  -3  -5  11    0.33    0.97
  -3  -5  12    0.34    1.00
  -3  -5  13    0.20    1.05
  -3  -5  14    0.31    1.16
  -3  -5  15    7.54    1.63
  -3  -5  16    0.64    1.34
   2   5  15   -0.58    1.00
   2   5  14    2.95    1.18
   2   5  13    5.30    1.25
   2   5  12    0.24    0.83
   2   5  11   17.13    1.69
   2   5  11   15.88    1.63
   2   5  10   -0.22    0.98
   2   5  10   -0.33    0.68
   2   5   9    1.12    0.73
   2   5   9    2.67    1.05
   2   5   8   15.32    1.45
   2   5   8   14.82    1.39
   2   5   7   67.30    2.49
   2   5   7   70.34    2.32
   2   5   6   26.58    1.64
   2   5   6   26.92    1.39
   2   5   5   35.43    1.67
   2   5   5   34.78    1.39
   2   5   4   26.11    1.12
   2   5   4   25.13    1.42
   2   5   3   32.24    1.36
   2   5   3   30.99    1.13
   2   5   2    3.69    0.41
   2   5   2    3.76    0.60
   2   5   1   20.42    0.83
   2   5   1   20.04    1.05
   2   5   0    0.61    0.42
   2   5  -1  136.99    2.90
  -2  -5   2    2.44    0.36
   2   5  -2    2.75    0.45
  -2  -5   3   79.26    2.16
  -2  -5   3   78.69    1.74
   2   5  -3   81.45    1.98
  -2  -5   4    1.93    0.32
  -2  -5   4    2.20    0.59
   2   5  -4    2.05    0.43
  -2  -5   5   14.69    1.36
  -2  -5   5   14.82    0.73
   2   5  -5   14.15    0.90
  -2  -5   6    1.15    0.70
  -2  -5   6    1.90    0.34
   2   5  -6    2.21    0.48
  -2  -5   7    0.33    0.31
  -2  -5   7    0.83    0.76
   2   5  -7    0.73    0.47
  -2  -5   8    2.49    0.43
  -2  -5   8    1.08    0.88
   2   5  -8    2.35    0.60
  -2  -5   9   19.70    1.94
  -2  -5   9   15.82    0.98
   2   5  -9   16.58    1.21
  -2  -5  10   15.63    1.20
  -2  -5  11   15.76    1.62
  -2  -5  12    0.26    0.96
  -2  -5  13   27.53    2.28
  -2  -5  14   -0.93    0.99
  -2  -5  15   -0.03    1.21
  -2  -5  16   -0.48    1.19
   1   5  15   -0.42    0.95
   1   5  14    1.91    1.08
   1   5  13   -0.70    0.81
   1   5  12   12.07    1.44
   1   5  11    4.41    1.00
   1   5  11    4.74    1.22
   1   5  10    2.76    0.82
   1   5  10    0.78    1.04
   1   5   9   37.48    2.26
   1   5   9   36.45    1.92
   1   5   8   -0.37    0.90
   1   5   8    0.78    0.62
   1   5   7    1.84    0.63
   1   5   7    2.75    0.95
   1   5   6    0.36    0.43
   1   5   6    0.21    0.72
   1   5   5   96.08    2.37
   1   5   5   91.08    2.60
   1   5   4    1.41    0.35
   1   5   4    1.91    0.63
   1   5   3  109.94    2.65
   1   5   3  106.83    2.30
   1   5   2   61.08    1.79
   1   5   2   61.05    1.43
   1   5   1   40.39    1.05
   1   5   1   44.83    1.46
   1   5   0   69.25    1.81
  -1  -5   1    0.95    0.34
   1   5  -1    0.66    0.39
  -1  -5   2    7.57    0.65
  -1  -5   2    9.97    0.87
   1   5  -2    8.90    0.70
  -1  -5   3   31.94    1.32
  -1  -5   3   28.77    0.97
   1   5  -3   30.06    0.99
  -1  -5   4   41.47    1.18
  -1  -5   4   42.07    1.63
   1   5  -4   40.63    1.23
  -1  -5   5   47.34    1.84
  -1  -5   5   45.09    1.27
   1   5  -5   45.73    1.35
  -1  -5   6    2.20    0.69
  -1  -5   6    1.35    0.33
   1   5  -6    1.97    0.42
  -1  -5   7    7.97    1.04
  -1  -5   7    8.85    0.79
   1   5  -7    8.56    0.79
  -1  -5   8    8.08    0.67
  -1  -5   8    6.47    1.07
   1   5  -8    8.22    0.76
  -1  -5   9    4.35    0.59
  -1  -5   9    4.97    1.08
  -1  -5   9    5.78    0.73
  -1  -5  10   38.29    2.24
  -1  -5  11    0.30    0.83
  -1  -5  12    1.61    1.01
  -1  -5  13    3.57    1.19
  -1  -5  14   -0.42    1.01
  -1  -5  15    7.91    1.58
  -1  -5  16    1.03    1.25
   0   5  16   -0.69    1.05
   0   5  15   -0.08    1.00
   0   5  14    1.26    1.01
   0   5  13    2.45    1.02
   0   5  12    5.81    1.34
   0   5  12    7.77    1.21
   0   5  11   13.10    1.48
   0   5  11   13.15    1.36
   0   5  10    0.09    0.70
   0   5  10    0.36    0.96
   0   5   9   41.84    2.35
   0   5   9   41.93    2.05
   0   5   8    4.49    0.81
   0   5   8    5.02    1.11
   0   5   7   55.73    1.99
   0   5   7   50.13    2.18
   0   5   6    3.60    0.82
   0   5   6    3.15    0.60
   0   5   5    4.16    0.78
   0   5   5    3.79    0.52
   0   5   4    1.28    0.59
   0   5   4    1.26    0.33
   0   5   3  118.12    2.38
   0   5   3  118.60    2.77
   0   5   2   19.06    0.63
   0   5   2   21.33    1.15
   0   5   1   29.89    1.25
   0   5   1   27.22    0.70
   0  -5   0    0.55    0.35
   0   5   0    0.37    0.50
   0  -5   1   29.23    0.98
   0  -5   1   26.65    1.01
   0   5  -1   27.88    1.07
   0  -5   2   20.77    0.86
   0  -5   2   21.31    1.00
   0   5  -2   20.58    0.81
   0  -5   3  115.91    2.66
   0  -5   3  120.57    2.39
   0   5  -3  119.36    2.38
   0  -5   4    0.71    0.45
   0  -5   4    1.32    0.31
   0   5  -4    0.97    0.28
   0  -5   5    4.54    0.68
   0  -5   5    3.08    0.42
   0   5  -5    4.15    0.40
   0  -5   6    2.99    0.44
   0  -5   6    3.58    0.73
   0   5  -6    3.17    0.40
   0  -5   7   49.42    1.55
   0  -5   7   50.35    2.15
   0   5  -7   47.13    1.35
   0  -5   8    4.04    0.58
   0  -5   8    3.28    0.88
   0  -5   8    5.05    0.56
   0  -5   9   41.00    2.23
   0  -5   9   44.13    1.62
   0  -5  10   -0.19    0.73
   0  -5  11   10.84    1.35
   0  -5  12    5.94    1.24
   0  -5  13    3.15    1.09
   0  -5  14    0.52    1.04
   0  -5  15    0.15    1.12
   0  -5  16   -1.21    1.09
  -1   5  16    0.93    1.17
  -1   5  15    9.12    1.52
  -1   5  14    0.07    0.95
  -1   5  13    3.45    1.34
  -1   5  13    5.13    1.20
  -1   5  12    1.11    1.15
  -1   5  12    1.12    0.91
  -1   5  11   -0.92    0.73
  -1   5  11    0.22    1.07
  -1   5  10   36.97    2.16
  -1   5  10   36.62    2.00
  -1   5   9    6.49    1.27
  -1   5   9    5.44    0.93
  -1   5   8    7.57    0.93
  -1   5   8    7.23    1.17
  -1   5   7    7.87    0.83
  -1   5   7    8.78    1.11
  -1   5   6    1.32    0.50
  -1   5   6    2.10    0.76
  -1   5   5   45.08    1.78
  -1   5   5   47.13    1.50
  -1   5   4   40.48    1.21
  -1   5   4   39.52    1.57
  -1   5   3   30.87    0.90
  -1   5   3   27.98    1.30
   1  -5  -2    8.79    0.75
  -1   5   2    7.43    0.72
  -1   5   2    8.17    0.39
   1  -5  -1    1.29    0.33
  -1   5   1    1.23    0.53
   1  -5   0   69.13    1.32
   1  -5   0   68.28    1.60
  -1   5   0   68.81    1.77
   1  -5   1   44.34    1.24
   1  -5   1   45.61    1.16
  -1   5  -1   44.15    1.29
   1  -5   2   63.32    1.54
   1  -5   2   62.09    1.58
  -1   5  -2   60.45    1.43
   1  -5   3  105.58    2.26
   1  -5   3  109.48    2.47
  -1   5  -3  106.54    2.08
   1  -5   4    1.68    0.48
   1  -5   4    1.53    0.35
  -1   5  -4    1.83    0.25
   1  -5   5   92.29    2.53
   1  -5   5   90.81    2.15
   1  -5   6    0.22    0.34
   1  -5   6    0.79    0.57
   1  -5   7    0.92    0.43
   1  -5   7    2.59    0.75
   1  -5   8    0.05    0.44
   1  -5   8    0.79    0.71
   1  -5   9   35.01    2.03
   1  -5   9   32.56    1.53
   1  -5  10    1.85    0.85
   1  -5  11    3.96    1.01
   1  -5  12   11.02    1.41
   1  -5  13   -0.50    0.84
   1  -5  14    2.26    1.16
   1  -5  15   -0.71    0.99
  -2   5  16   -1.32    1.00
  -2   5  15   -2.43    0.93
  -2   5  14   -0.83    0.94
  -2   5  13   29.61    2.15
  -2   5  13   27.97    2.41
  -2   5  12    0.56    0.85
  -2   5  12    0.09    1.09
  -2   5  11   19.96    1.73
  -2   5  11   17.03    1.65
  -2   5  10   12.51    1.47
  -2   5  10    7.26    1.04
  -2   5   9   16.79    1.58
  -2   5   9   15.71    1.59
  -2   5   8    2.26    1.05
  -2   5   8    2.76    0.77
  -2   5   7    0.56    0.82
  -2   5   7    0.60    0.58
  -2   5   6    1.35    0.52
  -2   5   6    1.78    0.76
  -2   5   5   14.89    1.00
  -2   5   5   15.81    1.32
  -2   5   4    1.89    0.62
  -2   5   4    1.75    0.39
   2  -5  -3   78.85    1.80
  -2   5   3   79.61    1.71
   2  -5  -2    2.86    0.38
  -2   5   2    2.74    0.56
  -2   5   2    2.65    0.26
   2  -5  -1  136.25    2.64
   2  -5   0    0.14    0.14
   2  -5   0    0.19    0.25
  -2   5   0    0.23    0.42
   2  -5   1   20.12    0.71
   2  -5   1   18.62    0.84
  -2   5  -1   20.40    0.92
   2  -5   2    3.27    0.40
   2  -5   2    2.88    0.39
  -2   5  -2    4.02    0.40
   2  -5   3   28.62    1.06
   2  -5   3   29.38    1.14
   2  -5   4   24.15    1.03
   2  -5   4   23.48    1.23
   2  -5   5   34.51    1.53
   2  -5   5   35.51    1.31
   2  -5   6   27.21    1.52
   2  -5   6   23.82    1.17
   2  -5   7   63.72    2.34
   2  -5   7   59.32    1.88
   2  -5   8   17.03    1.56
   2  -5   8   14.02    1.12
   2  -5   9    2.96    0.65
   2  -5   9    3.95    0.92
   2  -5  10    1.42    0.79
   2  -5  11   18.18    1.79
   2  -5  12   -0.02    0.81
   2  -5  13    4.20    1.21
   2  -5  14    2.28    1.16
   2  -5  15   -0.87    0.99
  -3   5  15    7.31    1.50
  -3   5  14   -0.44    0.98
  -3   5  13    1.59    1.27
  -3   5  13    0.71    0.98
  -3   5  12    1.32    1.14
  -3   5  12   -0.07    0.90
  -3   5  11    0.36    1.11
  -3   5  11   -0.47    0.80
  -3   5  10   12.66    1.46
  -3   5  10    8.26    1.09
  -3   5   9   74.95    2.65
  -3   5   9   80.69    2.90
  -3   5   8    1.18    0.74
  -3   5   8    0.19    0.93
  -3   5   7   -0.04    0.82
  -3   5   7    0.35    0.65
  -3   5   6   -0.01    0.72
  -3   5   6    2.06    0.61
   3  -5  -5  109.43    2.31
  -3   5   5  108.19    2.82
  -3   5   5  106.77    2.56
   3  -5  -4    0.74    0.31
  -3   5   4    0.28    0.41
  -3   5   4    0.20    0.56
   3  -5  -3   61.65    1.48
  -3   5   3   59.09    1.80
  -3   5   3   60.25    1.49
   3  -5  -2  112.51    2.26
  -3   5   2  111.13    2.59
   3  -5  -1   13.17    0.52
   3  -5  -1   13.43    0.73
  -3   5   1   12.54    0.88
   3  -5   0   10.32    0.52
   3  -5   0    8.15    0.67
  -3   5   0    9.63    0.83
   3  -5   1   18.92    0.77
   3  -5   1   19.02    0.90
  -3   5  -1   18.29    0.83
   3  -5   2   53.78    1.49
   3  -5   2   50.66    1.42
  -3   5  -2   50.57    1.25
   3  -5   3    3.28    0.46
   3  -5   3    2.52    0.41
   3  -5   4    1.97    0.48
   3  -5   4    2.21    0.42
   3  -5   5   16.89    1.21
   3  -5   5   16.31    1.03
   3  -5   6    0.01    0.39
   3  -5   6   -0.01    0.54
   3  -5   7    2.57    0.74
   3  -5   7    2.78    0.58
   3  -5   8    2.31    0.60
   3  -5   8    1.49    0.77
   3  -5   9   65.75    2.23
   3  -5   9   68.65    2.71
   3  -5  10    0.15    0.74
   3  -5  11    8.09    1.23
   3  -5  12    8.17    1.33
   3  -5  13    0.00    0.87
   3  -5  14   -1.28    0.85
   3  -5  15    1.57    1.12
  -4   5  15    0.27    1.15
  -4   5  14   -1.00    0.97
  -4   5  14   -0.14    1.33
  -4   5  13   11.31    1.66
  -4   5  13   12.08    1.50
  -4   5  12    0.19    0.91
  -4   5  12    2.45    1.25
  -4   5  11   24.05    1.92
  -4   5  10    2.47    1.11
  -4   5  10    0.63    0.83
  -4   5   9    5.29    1.02
  -4   5   9    5.63    1.14
   4  -5  -8    1.72    0.50
  -4   5   8    1.44    1.02
  -4   5   8    3.69    0.88
   4  -5  -7   12.45    1.00
  -4   5   7   15.46    1.49
  -4   5   7   12.29    1.26
   4  -5  -6    1.74    0.40
  -4   5   6    0.93    0.79
  -4   5   6    1.82    0.67
   4  -5  -5   13.47    0.80
  -4   5   5   13.59    1.15
  -4   5   5   13.85    1.21
   4  -5  -4    2.02    0.35
  -4   5   4    2.35    0.66
  -4   5   4    3.09    0.53
   4  -5  -3  109.08    2.25
  -4   5   3  111.53    2.38
  -4   5   3  110.49    2.73
   4  -5  -2    0.23    0.26
  -4   5   2   -0.35    0.45
   4  -5  -1   83.82    1.89
   4  -5  -1   82.35    1.78
  -4   5   1   79.99    2.04
   4  -5   0    8.03    0.68
   4  -5   0    7.54    0.55
  -4   5   0    6.65    0.61
   4  -5   1   38.99    1.28
   4  -5   1   38.40    1.20
  -4   5  -1   38.54    1.17
   4  -5   2    0.02    0.28
   4  -5   2   -0.13    0.30
  -4   5  -2    0.01    0.32
   4  -5   3  291.38    5.37
   4  -5   3  292.70    5.65
   4  -5   4    2.51    0.53
   4  -5   4    3.33    0.52
   4  -5   5    1.64    0.55
   4  -5   5    1.17    0.45
   4  -5   6    5.17    0.80
   4  -5   6    5.19    0.69
   4  -5   7    8.25    1.02
   4  -5   7    6.78    0.79
   4  -5   8    2.49    0.80
   4  -5   8    1.92    0.61
   4  -5   9    1.73    0.77
   4  -5   9    1.25    0.62
   4  -5  10    1.44    0.81
   4  -5  11   -0.12    0.74
   4  -5  12    0.36    0.83
   4  -5  13   39.52    2.56
   4  -5  14    0.60    0.97
   4  -5  15   -0.57    0.97
  -5   5  15   -0.59    1.13
  -5   5  14    1.71    1.40
  -5   5  14   -1.42    1.00
  -5   5  13    1.84    1.29
  -5   5  13    0.09    0.99
  -5   5  12    3.03    1.22
  -5   5  12    0.53    0.96
  -5   5  11   26.78    2.01
  -5   5  11   25.33    2.01
  -5   5  10    1.41    1.04
  -5   5  10    0.42    0.84
  -5   5   9   34.88    2.07
  -5   5   9   41.17    2.12
  -5   5   8   42.14    2.13
  -5   5   8   39.91    2.14
   5  -5  -7    4.83    0.47
  -5   5   7    4.48    0.93
  -5   5   7    6.39    1.08
   5  -5  -6    1.44    0.35
  -5   5   6    1.23    0.72
  -5   5   6    1.13    0.84
   5  -5  -5   15.85    0.80
  -5   5   5   15.15    1.29
  -5   5   5   13.96    1.29
   5  -5  -4   24.68    0.93
  -5   5   4   24.29    1.35
  -5   5   4   25.23    1.23
   5  -5  -3    0.48    0.28
  -5   5   3    0.26    0.55
   5  -5  -2   14.76    0.80
  -5   5   2   12.47    1.01
   5  -5  -1    2.45    0.35
   5  -5  -1    2.50    0.40
  -5   5   1    2.80    0.56
   5  -5   0    8.00    0.65
   5  -5   0    8.05    0.75
  -5   5   0    7.32    0.65
   5  -5   1   20.75    1.03
   5  -5   1   19.02    0.93
  -5   5  -1   18.94    0.93
   5  -5   2   72.91    1.99
   5  -5   2   75.86    2.00
  -5   5  -2   69.65    1.69
   5  -5   3   63.41    1.93
   5  -5   3   66.10    1.91
  -5   5  -3   60.44    1.42
   5  -5   4    6.66    0.75
   5  -5   4    4.92    0.63
   5  -5   5    0.61    0.52
   5  -5   5    0.19    0.42
   5  -5   6    1.36    0.57
   5  -5   6    1.30    0.60
   5  -5   7    1.71    0.62
   5  -5   7    2.62    0.74
   5  -5   8    1.14    0.70
   5  -5   8    1.22    0.60
   5  -5   9   31.23    1.72
   5  -5   9   26.02    1.86
   5  -5  10    0.47    0.74
   5  -5  11    5.07    1.11
   5  -5  12    1.25    0.87
   5  -5  13    4.24    1.24
   5  -5  14   -0.19    0.98
  -6   5  15    2.67    1.57
  -6   5  14    0.62    1.35
  -6   5  14   -0.48    1.06
  -6   5  13    1.36    1.10
  -6   5  13    1.62    1.25
  -6   5  12    1.30    1.15
  -6   5  12    0.53    1.00
  -6   5  11    5.84    1.27
  -6   5  11    3.24    1.10
  -6   5  10    0.88    0.91
  -6   5  10    0.50    1.01
  -6   5   9    1.29    0.96
  -6   5   9   -0.95    0.84
  -6   5   8    2.42    0.98
  -6   5   8    3.09    1.05
  -6   5   7  147.89    3.82
  -6   5   7  151.52    3.98
   6  -5  -6    1.61    0.34
  -6   5   6    2.11    0.82
  -6   5   6    1.35    0.86
   6  -5  -5   25.96    0.98
  -6   5   5   27.01    1.60
  -6   5   5   25.83    1.58
   6  -5  -4   34.05    1.12
  -6   5   4   34.95    1.65
   6  -5  -3   46.40    1.34
  -6   5   3   41.61    1.70
   6  -5  -2   24.65    1.05
   6  -5  -2   24.33    1.30
  -6   5   2   24.76    1.34
   6  -5  -1    3.72    0.65
   6  -5  -1    3.71    0.48
   6  -5  -1    4.23    0.49
  -6   5   1    3.28    0.64
   6  -5   0   33.00    1.33
   6  -5   0   31.93    1.20
   6  -5   0   32.99    1.28
  -6   5   0   31.95    1.33
   6  -5   1   73.25    1.98
   6  -5   1   72.81    1.91
   6  -5   1   67.78    1.94
  -6   5  -1   67.67    1.83
   6  -5   2    2.55    0.50
   6  -5   2    2.83    0.51
  -6   5  -2    3.45    0.50
   6  -5   3   31.07    1.41
   6  -5   3   32.17    1.41
  -6   5  -3   31.56    1.03
   6  -5   4    5.97    0.77
   6  -5   4    5.58    0.69
   6  -5   5   -0.73    0.46
   6  -5   5   -0.50    0.44
   6  -5   6    3.86    0.77
   6  -5   6    4.14    0.74
   6  -5   7   15.01    1.29
   6  -5   7   15.67    1.48
   6  -5   8    0.59    0.68
   6  -5   8    2.09    0.68
   6  -5   9   -0.13    0.69
   6  -5  10    1.00    0.80
   6  -5  11    0.40    0.84
   6  -5  12    7.15    1.38
   6  -5  13   28.44    2.34
   6  -5  14   -0.54    0.90
  -7   5  15    8.81    1.87
  -7   5  14    0.70    1.32
  -7   5  14   -1.66    1.08
  -7   5  13   -1.45    1.00
  -7   5  13    1.64    1.31
  -7   5  12   -1.71    0.98
  -7   5  12   -0.78    1.07
  -7   5  11   16.11    1.72
  -7   5  11   13.31    1.54
  -7   5  10    3.05    1.11
  -7   5  10    0.43    0.99
  -7   5   9    8.70    1.28
  -7   5   9    6.50    1.17
  -7   5   8   -0.65    0.88
  -7   5   8   -0.19    0.85
  -7   5   7    0.50    0.92
  -7   5   7    1.29    0.98
   7  -5  -6    0.84    0.33
  -7   5   6    1.15    0.82
  -7   5   6    0.65    0.89
   7  -5  -5   34.20    1.14
  -7   5   5   33.70    1.82
  -7   5   5   31.57    1.82
   7  -5  -4   21.82    0.99
   7  -5  -4   21.66    1.52
  -7   5   4   20.36    1.50
   7  -5  -3   10.28    0.85
   7  -5  -3   10.81    1.08
  -7   5   3    8.79    1.01
   7  -5  -2    0.92    0.37
   7  -5  -2    0.48    0.63
   7  -5  -1    0.59    0.37
   7  -5  -1    0.32    0.35
   7  -5  -1    0.76    0.58
   7  -5   0    2.07    0.46
   7  -5   0    1.97    0.45
   7  -5   0    1.78    0.59
   7  -5   1   13.38    1.04
   7  -5   1   12.76    0.94
   7  -5   1   14.08    1.02
   7  -5   2    2.37    0.53
   7  -5   2    3.04    0.59
   7  -5   2    2.66    0.55
   7  -5   3   17.04    1.22
   7  -5   3   19.11    1.28
   7  -5   3   17.72    0.99
  -7   5  -3   18.14    0.98
   7  -5   4   89.66    2.60
   7  -5   4   88.94    2.69
  -7   5  -4   86.27    1.93
   7  -5   5   75.56    2.44
   7  -5   5   78.26    2.62
   7  -5   6    7.00    0.99
   7  -5   6    8.07    0.93
   7  -5   7    6.06    0.98
   7  -5   7    7.65    0.94
   7  -5   8    7.28    1.12
   7  -5   8    8.41    1.04
   7  -5   9    3.80    0.98
   7  -5  10    1.10    0.83
   7  -5  11    0.76    0.89
   7  -5  12   -0.98    0.85
   7  -5  13    9.80    1.58
   7  -5  14    0.90    1.09
  -8   5  14    1.90    1.43
  -8   5  13   -0.33    1.17
  -8   5  13    0.63    1.21
  -8   5  12    4.15    1.33
  -8   5  12    7.17    1.48
  -8   5  11   -0.19    1.00
  -8   5  11   -0.47    1.01
  -8   5  10   12.84    1.52
  -8   5  10   14.55    1.60
  -8   5   9   16.99    1.72
  -8   5   9   16.92    1.62
  -8   5   8    1.15    0.94
  -8   5   8    3.54    1.04
  -8   5   7   76.77    2.80
  -8   5   7   79.55    2.82
  -8   5   6    1.28    0.98
  -8   5   6    2.80    0.95
   8  -5  -5   14.33    0.90
   8  -5  -5   12.79    1.35
  -8   5   5   13.76    1.35
   8  -5  -4    4.40    0.94
   8  -5  -4    3.38    0.49
  -8   5   4    2.50    0.91
   8  -5  -3   50.40    1.58
   8  -5  -3   48.57    2.06
   8  -5  -2   12.15    1.01
   8  -5  -2   10.38    1.10
   8  -5  -1   13.27    1.05
   8  -5  -1   13.94    1.25
   8  -5  -1   14.90    1.07
   8  -5   0    0.58    0.61
   8  -5   0    0.79    0.46
   8  -5   0    0.56    0.44
   8  -5   1   -0.11    0.39
   8  -5   1    0.34    0.44
   8  -5   1    0.43    0.57
   8  -5   2    0.30    0.44
   8  -5   2    0.99    0.56
   8  -5   2    0.38    0.48
   8  -5   3   20.22    1.12
   8  -5   3   22.25    1.39
   8  -5   3   22.15    1.45
   8  -5   4    0.32    0.51
   8  -5   4   -0.14    0.56
   8  -5   4   -0.57    0.46
   8  -5   5    4.47    0.83
   8  -5   5    4.21    0.77
   8  -5   6    1.28    0.69
   8  -5   6    2.62    0.72
   8  -5   7  107.05    3.19
   8  -5   7  102.84    3.42
   8  -5   8    3.93    0.94
   8  -5   9    0.05    0.72
   8  -5  10    0.41    0.77
   8  -5  11    3.02    1.11
   8  -5  12    7.52    1.42
   8  -5  13    1.53    1.05
  -9   5  14    2.05    1.40
  -9   5  13    5.91    1.55
  -9   5  12    3.87    1.37
  -9   5  12    5.59    1.43
  -9   5  11    3.85    1.23
  -9   5  11    0.97    1.12
  -9   5  10    2.80    1.17
  -9   5  10    5.01    1.27
  -9   5   9    9.41    1.40
  -9   5   9    6.94    1.30
  -9   5   8    1.31    0.99
  -9   5   8    1.32    0.94
  -9   5   7    0.99    0.90
  -9   5   6    2.30    0.92
  -9   5   6    3.00    1.01
   9  -5  -5   29.47    1.90
   9  -5  -5   31.73    1.23
  -9   5   5   32.56    1.96
   9  -5  -4   23.86    1.17
   9  -5  -4   22.36    1.68
   9  -5  -3   14.55    1.45
   9  -5  -3   14.37    1.07
   9  -5  -2    0.28    0.75
   9  -5  -2    0.15    0.43
   9  -5  -1    9.54    0.90
   9  -5  -1    9.87    1.09
   9  -5  -1    6.97    0.75
   9  -5   0    0.96    0.69
   9  -5   0    0.37    0.46
   9  -5   0    0.71    0.48
   9  -5   1    0.14    0.44
   9  -5   1    0.03    0.62
   9  -5   1    0.18    0.49
   9  -5   2    0.31    0.54
   9  -5   2    0.30    0.47
   9  -5   2    0.91    0.60
   9  -5   3   13.84    1.11
   9  -5   3   13.09    1.24
   9  -5   3   13.15    1.25
   9  -5   4   -0.12    0.52
   9  -5   4   -0.02    0.55
   9  -5   5   63.87    2.48
   9  -5   5   65.47    2.43
   9  -5   6    0.37    0.60
   9  -5   6   -0.58    0.57
   9  -5   7   19.88    1.71
   9  -5   8    2.64    0.93
   9  -5   9    5.18    1.12
   9  -5  10    3.35    1.06
   9  -5  11    4.60    1.23
   9  -5  12    0.08    0.93
   9  -5  13   -1.14    0.86
 -10   5  14    3.11    1.47
 -10   5  13    9.46    1.75
 -10   5  12    2.17    1.34
 -10   5  11   15.46    1.76
 -10   5  11   11.25    1.70
 -10   5  10   -1.70    1.04
 -10   5  10    0.27    1.08
 -10   5   9   -0.33    0.98
 -10   5   9   -1.56    0.96
 -10   5   8    2.11    1.09
 -10   5   8    1.38    1.02
 -10   5   7    2.48    0.99
 -10   5   7    3.62    1.08
  10  -5  -6    2.58    1.01
 -10   5   6    4.54    1.10
 -10   5   6    1.11    0.84
  10  -5  -5   18.21    1.66
 -10   5   5   16.81    1.71
  10  -5  -4    3.68    1.00
  10  -5  -3   47.91    1.69
  10  -5  -3   46.32    2.22
  10  -5  -2    1.07    0.81
  10  -5  -2    0.39    0.47
  10  -5  -1   16.44    1.32
  10  -5  -1   17.75    1.32
  10  -5  -1   18.67    1.45
  10  -5   0   16.68    1.42
  10  -5   0   18.06    1.37
  10  -5   0   18.46    1.40
  10  -5   1    0.85    0.55
  10  -5   1    3.02    0.80
  10  -5   1    2.19    0.65
  10  -5   2    0.18    0.54
  10  -5   2    0.08    0.63
  10  -5   2   -0.13    0.49
  10  -5   3    7.43    0.86
  10  -5   3    5.80    0.88
  10  -5   3    6.11    0.87
  10  -5   4   -0.02    0.58
  10  -5   4    1.12    0.61
  10  -5   5    0.19    0.62
  10  -5   5    0.33    0.60
  10  -5   6   11.07    1.30
  10  -5   7   26.25    1.90
  10  -5   8    0.51    0.75
  10  -5   9    5.29    1.17
  10  -5  10    3.02    1.04
  10  -5  11    2.77    1.13
  10  -5  12    0.67    0.96
 -11   5  13    4.31    1.48
 -11   5  12    4.17    1.43
 -11   5  11    3.66    1.40
 -11   5  10    0.48    1.10
 -11   5  10   -1.43    1.07
 -11   5   9   19.00    1.80
 -11   5   9   13.21    1.66
 -11   5   8    0.47    0.98
 -11   5   8    1.38    1.03
 -11   5   7   -0.02    0.95
 -11   5   7   -0.60    0.86
  11  -5  -6    6.55    1.31
 -11   5   6    8.72    1.33
  11  -5  -5   16.73    1.70
  11  -5  -4    3.00    0.99
  11  -5  -3    7.60    1.18
  11  -5  -3    7.50    0.79
  11  -5  -2   23.61    1.41
  11  -5  -2   20.96    1.68
  11  -5  -1   23.76    1.65
  11  -5  -1   23.01    1.50
  11  -5  -1   23.17    1.43
  11  -5   0    1.98    0.61
  11  -5   0    2.17    0.83
  11  -5   0    1.48    0.61
  11  -5   1   29.69    1.67
  11  -5   1   27.11    1.62
  11  -5   1   25.50    1.58
  11  -5   2    0.98    0.61
  11  -5   2    1.22    0.66
  11  -5   2    2.31    0.76
  11  -5   3    2.63    0.74
  11  -5   3    1.84    0.75
  11  -5   4   14.25    1.41
  11  -5   4   13.61    1.33
  11  -5   5   -0.43    0.57
  11  -5   6    0.95    0.71
  11  -5   7    2.79    0.90
  11  -5   8    1.05    0.85
  11  -5   9    3.14    1.01
  11  -5  10    1.16    0.94
  11  -5  11    5.50    1.30
 -12   5  12   -0.35    1.20
 -12   5  11    5.21    1.44
 -12   5  10    3.78    1.31
 -12   5   9    2.02    1.13
 -12   5   9   -0.15    1.12
 -12   5   8    3.68    1.19
 -12   5   8    6.49    1.33
 -12   5   7    2.26    1.17
 -12   5   7    4.70    1.14
  12  -5  -6    0.44    0.99
 -12   5   6    0.85    0.98
  12  -5  -5    1.94    1.06
  12  -5  -4   -0.45    0.90
  12  -5  -3   57.60    1.99
  12  -5  -3   51.56    2.44
  12  -5  -2    2.23    0.66
  12  -5  -2    3.61    1.04
  12  -5  -1    0.32    0.55
  12  -5  -1    0.28    0.58
  12  -5  -1    0.58    0.79
  12  -5   0    3.55    0.78
  12  -5   0    3.38    0.77
  12  -5   0    3.26    0.95
  12  -5   1   18.23    1.48
  12  -5   1   20.80    1.57
  12  -5   1   21.95    1.60
  12  -5   2    8.73    1.11
  12  -5   2    7.40    1.07
  12  -5   2    7.69    1.06
  12  -5   3    9.38    1.18
  12  -5   4    1.24    0.68
  12  -5   5    1.35    0.73
  12  -5   6    0.40    0.69
  12  -5   7   13.31    1.54
  12  -5   8    1.89    0.95
  12  -5   9   -0.63    0.77
  12  -5  10    0.89    0.94
 -13   5  12    2.46    1.37
 -13   5  11    5.76    1.55
 -13   5  10    1.06    1.23
 -13   5   9   21.69    2.08
 -13   5   8    0.96    1.11
 -13   5   8   -0.94    1.08
  13  -5  -7    6.39    1.44
 -13   5   7    7.34    1.28
 -13   5   7    8.62    1.43
  13  -5  -6    0.54    1.04
 -13   5   6    0.13    0.97
  13  -5  -5    0.95    1.05
  13  -5  -4    0.98    0.98
  13  -5  -3   -0.77    0.84
  13  -5  -2    0.50    0.90
  13  -5  -1   19.72    1.57
  13  -5  -1   22.23    1.73
  13  -5   0    8.26    1.22
  13  -5   0    8.69    1.11
  13  -5   1    7.89    1.09
  13  -5   1    5.48    1.09
  13  -5   2    2.54    0.83
  13  -5   3    1.44    0.73
  13  -5   4    0.09    0.65
  13  -5   5    3.47    0.96
  13  -5   6    0.02    0.69
  13  -5   7    0.76    0.84
  13  -5   8    1.68    0.98
  13  -5   9    2.12    1.07
 -14   5  11    3.06    1.39
 -14   5  10    1.07    1.24
 -14   5   9    3.44    1.34
 -14   5   8   -0.21    1.12
 -14   5   7   25.04    2.11
 -14   5   7   18.12    1.86
  14  -5  -6    1.93    1.15
 -14   5   6    3.95    1.20
  14  -5  -5    3.14    1.21
  14  -5  -4    9.19    1.53
  14  -5  -3    3.61    1.15
  14  -5  -2   -0.46    0.88
  14  -5  -1    0.46    0.90
  14  -5   0    1.51    0.98
  14  -5   0    3.49    0.91
  14  -5   1    0.46    0.68
  14  -5   1    3.40    1.01
  14  -5   2   11.33    1.34
  14  -5   3   16.07    1.59
  14  -5   4    3.95    0.99
  14  -5   5    1.89    0.86
  14  -5   6    0.55    0.81
  14  -5   7    9.33    1.46
  14  -5   8    1.51    0.94
 -15   5   9   10.94    1.72
 -15   5   8    2.94    1.36
 -15   5   7    1.84    1.26
  15  -5  -6   -0.47    1.13
 -15   5   6    2.13    1.25
  15  -5  -5    6.61    1.49
 -15   5   5    9.14    1.55
  15  -5  -4    1.17    1.19
  15  -5  -3   -0.39    0.99
  15  -5  -2    2.63    1.13
  15  -5  -1    0.90    0.97
  15  -5   0    0.57    0.74
  15  -5   0   -0.21    0.91
  15  -5   1    3.70    0.99
  15  -5   2    0.94    0.76
  15  -5   3    1.47    0.83
  15  -5   4    0.21    0.72
  15  -5   5   31.28    2.24
  15  -5   6   -0.30    0.76
  15  -5   7    0.97    0.96
 -16   5   8    1.68    1.33
 -16   5   7    6.25    1.52
  16  -5  -6    2.15    1.37
 -16   5   6    4.35    1.42
  16  -5  -5   -0.94    1.14
 -16   5   5    0.17    1.14
  16  -5  -4    0.41    1.14
  16  -5  -3    0.86    1.17
  16  -5  -2    1.64    1.14
  16  -5  -1    7.14    1.45
  16  -5   0    1.09    0.89
  16  -5   1    6.58    1.22
  16  -5   2    2.36    0.95
  16  -5   3    2.41    0.98
  16  -5   4    1.29    0.88
  16  -5   5    3.89    1.08
 -17   5   6    3.21    1.36
  17  -5  -5   11.71    1.92
 -17   5   5   15.80    1.90
  17  -5  -4   -0.41    1.21
 -17   5   4    3.91    1.33
  17  -5  -3    1.28    1.21
 -17   5   3    3.96    1.29
  17  -5  -2   -1.28    1.08
  17  -5   1   -0.47    0.80
  17  -5   2    0.87    0.89
  17  -5   3    1.53    0.96
  17   6   3    1.05    0.96
  17   6   2    4.08    1.25
  17   6   2    4.79    1.29
  17   6   1    0.56    1.00
  17   6   0    1.29    1.08
  17   6  -1    0.80    1.06
  17   6  -2    6.25    1.43
  17   6  -3    1.42    1.07
  17   6  -4    4.25    1.29
  17   6  -5    1.54    1.09
  17   6  -6    1.34    1.11
  16   6   5    2.02    0.99
  16   6   4    5.39    1.25
  16   6   3    0.84    1.12
  16   6   3   -0.06    0.86
  16   6   2   -0.13    0.86
  16   6   2    0.40    1.00
  16   6   1    5.25    1.27
  16   6   0   -0.43    0.87
  16   6  -1    6.84    1.38
  16   6  -2    1.19    1.05
  16   6  -3    1.90    1.06
  16   6  -4    7.82    1.49
  16   6  -5   -0.10    0.96
  16   6  -6    0.52    1.01
  16   6  -7    2.68    1.22
 -16  -6   8    1.44    1.46
  16   6  -8    0.65    1.06
  15   6   7    5.59    1.26
  15   6   6    1.99    1.00
  15   6   5    0.50    0.85
  15   6   4    8.30    1.36
  15   6   4    8.26    1.41
  15   6   3    0.16    0.82
  15   6   3    1.00    0.97
  15   6   2    8.16    1.33
  15   6   2    8.36    1.45
  15   6   1    1.08    1.02
  15   6   1   -0.36    0.76
  15   6   0    0.13    1.02
  15   6  -1   13.02    1.63
  15   6  -2    0.66    0.92
  15   6  -3    1.90    1.04
  15   6  -4    0.02    0.92
  15   6  -5    1.86    1.08
  15   6  -6    1.84    1.06
  15   6  -7    1.72    1.04
 -15  -6   8   18.53    2.26
  15   6  -8   19.83    2.00
 -15  -6   9    2.37    1.54
  15   6  -9    2.14    1.15
  14   6   8    2.80    1.06
  14   6   7    4.22    1.16
  14   6   6    7.88    1.36
  14   6   5    4.15    1.11
  14   6   4   22.33    1.94
  14   6   4   24.14    1.99
  14   6   3   -1.31    0.64
  14   6   3    1.77    0.97
  14   6   2   -1.06    0.74
  14   6   2    0.25    0.76
  14   6   1    0.62    0.77
  14   6   1    2.18    1.01
  14   6   0    6.87    1.30
  14   6  -1    0.24    0.89
  14   6  -2    6.23    1.28
  14   6  -3    0.21    0.83
  14   6  -4    3.30    1.06
  14   6  -5   18.72    1.82
  14   6  -6    1.54    0.95
 -14  -6   7    0.64    1.23
  14   6  -7    1.59    1.00
 -14  -6   8    1.07    1.35
  14   6  -8    0.54    0.96
 -14  -6   9   -0.13    1.40
  14   6  -9    0.63    0.99
 -14  -6  10    3.43    1.68
  14   6 -10    6.07    1.40
  13   6   9    4.45    1.22
  13   6   8   -0.05    0.88
  13   6   7    9.67    1.45
  13   6   6    1.84    0.91
  13   6   5    2.55    1.03
  13   6   5    3.55    0.98
  13   6   4   18.63    1.76
  13   6   4   19.60    1.84
  13   6   3    5.59    1.07
  13   6   3    6.19    1.20
  13   6   2    2.12    0.97
  13   6   2    1.58    0.77
  13   6   1    0.68    0.86
  13   6   1    0.29    0.70
  13   6   0   -0.06    0.67
  13   6   0    0.00    0.82
  13   6  -1    0.59    0.85
  13   6  -2   15.29    1.68
  13   6  -3    7.95    1.34
  13   6  -4    0.25    0.82
  13   6  -5   -0.43    0.76
  13   6  -6    6.21    1.25
 -13  -6   7    3.36    1.36
  13   6  -7    0.81    0.92
 -13  -6   8    8.95    1.67
  13   6  -8    7.45    1.34
 -13  -6   9    1.97    1.43
  13   6  -9   -0.15    0.92
 -13  -6  10   -0.09    1.49
  13   6 -10    2.19    1.08
 -13  -6  11    0.79    1.61
  13   6 -11    3.00    1.16
  12   6  10   17.22    1.93
  12   6   9    0.11    0.81
  12   6   8   -0.11    0.81
  12   6   7    0.69    0.82
  12   6   6   -0.23    0.84
  12   6   6    0.44    0.72
  12   6   5    7.60    1.21
  12   6   5    8.04    1.28
  12   6   4   -0.36    0.64
  12   6   4   -0.10    0.81
  12   6   3   27.64    1.91
  12   6   3   26.62    1.88
  12   6   2    0.96    0.83
  12   6   2    0.45    0.74
  12   6   1    0.96    0.83
  12   6   1    0.13    0.66
  12   6   0   52.10    2.44
  12   6   0   51.90    2.44
  12   6  -1    0.46    0.81
  12   6  -2   12.78    1.47
  12   6  -3   18.78    1.73
  12   6  -4    6.70    1.19
  12   6  -5   16.51    1.65
  12   6  -6   -0.03    0.78
 -12  -6   7    1.22    1.22
  12   6  -7    1.76    0.91
 -12  -6   8    6.37    1.48
  12   6  -8    5.62    1.20
 -12  -6   9   -0.25    1.22
  12   6  -9    0.46    0.91
 -12  -6  10    5.34    1.68
  12   6 -10    4.33    1.22
 -12  -6  11   -0.49    1.52
  12   6 -11    2.20    1.09
 -12  -6  12   -0.02    1.53
  12   6 -12    1.17    1.03
  11   6  11    2.53    1.14
  11   6  10    1.19    1.01
  11   6   9    5.37    1.27
  11   6   8    0.51    0.79
  11   6   7    0.71    0.77
  11   6   6    1.10    0.90
  11   6   6    0.89    0.73
  11   6   5    0.12    0.81
  11   6   5    0.94    0.71
  11   6   4    0.29    0.80
  11   6   4    0.10    0.59
  11   6   3   10.55    1.24
  11   6   3    9.62    1.29
  11   6   2    3.04    0.83
  11   6   2    4.21    0.99
  11   6   1    7.23    1.11
  11   6   1    6.49    1.03
  11   6   0    4.47    0.89
  11   6   0    3.02    0.91
  11   6  -1    1.87    0.84
  11   6  -2   41.41    2.11
  11   6  -3    0.67    0.76
  11   6  -4    1.17    0.83
  11   6  -5    0.49    0.74
  11   6  -6    1.07    0.80
 -11  -6   7   11.83    1.59
  11   6  -7   11.21    1.41
 -11  -6   8    2.42    1.29
  11   6  -8    3.18    1.00
 -11  -6   9    3.86    1.44
  11   6  -9    4.18    1.12
 -11  -6  10    2.04    1.44
  11   6 -10    2.67    1.02
 -11  -6  11   -0.20    1.42
  11   6 -11    0.66    0.96
 -11  -6  12   10.74    2.07
  11   6 -12   16.54    1.83
 -11  -6  13   -1.90    1.49
  11   6 -13    1.15    1.10
  10   6  12    1.54    1.12
  10   6  11    0.15    0.95
  10   6  10   16.88    1.86
  10   6   9    0.08    0.79
  10   6   8    3.31    1.00
  10   6   7    0.25    0.83
  10   6   7    1.28    0.79
  10   6   6    7.19    1.12
  10   6   6    7.98    1.21
  10   6   5   42.71    2.15
  10   6   5   48.64    2.34
  10   6   4   26.04    1.78
  10   6   4   28.85    1.82
  10   6   3    1.85    0.67
  10   6   3    2.70    0.85
  10   6   2    2.12    0.70
  10   6   2    2.37    0.85
  10   6   1    0.66    0.59
  10   6   1   -0.36    0.69
  10   6   0   18.23    1.54
  10   6   0   18.94    1.54
  10   6  -1    0.76    0.76
  10   6  -2    0.91    0.76
  10   6  -3    4.37    0.97
  10   6  -4    9.20    1.21
  10   6  -5   -0.31    0.68
  10   6  -6   40.83    2.12
 -10  -6   7    5.44    1.36
  10   6  -7    6.85    1.14
 -10  -6   8   -0.26    1.09
  10   6  -8    0.39    0.78
 -10  -6   9   10.66    1.71
  10   6  -9   11.15    1.40
 -10  -6  10    2.31    1.36
  10   6 -10    3.51    1.04
 -10  -6  11   11.85    1.94
  10   6 -11   12.04    1.55
 -10  -6  12   -0.75    1.46
  10   6 -12    0.02    0.93
 -10  -6  13   -1.53    1.55
  10   6 -13    0.19    1.04
   9   6  12    3.93    1.26
   9   6  11    6.01    1.33
   9   6  10   -0.20    0.81
   9   6   9    0.44    0.79
   9   6   8    5.74    1.13
   9   6   7    2.48    0.86
   9   6   7    1.10    0.89
   9   6   6   14.37    1.42
   9   6   6   14.87    1.48
   9   6   5    2.65    0.77
   9   6   5    1.62    0.82
   9   6   4    0.57    0.61
   9   6   4    1.03    0.74
   9   6   3    4.49    0.84
   9   6   3    3.48    0.89
   9   6   2    0.61    0.60
   9   6   2    1.37    0.77
   9   6   1   45.27    2.05
   9   6   1   41.84    2.06
   9   6   0   20.13    1.53
   9   6   0   19.86    1.54
   9   6  -1    7.72    1.05
   9   6  -2   65.02    2.46
   9   6  -3    1.53    0.71
   9   6  -4   -0.34    0.68
   9   6  -5    0.98    0.79
  -9  -6   6    3.69    1.14
   9   6  -6    3.44    0.91
  -9  -6   7    7.15    1.31
   9   6  -7    4.27    0.94
  -9  -6   8   23.23    2.33
   9   6  -8   22.54    1.67
  -9  -6   9   -0.40    1.11
   9   6  -9    0.85    0.80
  -9  -6  10   -0.62    1.19
   9   6 -10    1.75    0.86
  -9  -6  11    0.25    1.31
   9   6 -11    1.84    0.97
  -9  -6  12    9.19    1.92
   9   6 -12   12.01    1.57
  -9  -6  13    1.01    1.52
   9   6 -13    1.57    1.09
  -9  -6  14   -1.42    1.52
   8   6  13   -0.53    0.96
   8   6  12   -0.19    0.91
   8   6  11   -0.39    0.85
   8   6  10    5.40    1.17
   8   6   9    6.60    1.17
   8   6   8    2.22    0.96
   8   6   8    2.02    0.85
   8   6   7   31.73    1.95
   8   6   7   32.47    1.99
   8   6   6   77.74    2.74
   8   6   6   75.23    2.82
   8   6   5   29.87    1.84
   8   6   5   27.31    1.66
   8   6   4   17.92    1.54
   8   6   4   17.33    1.43
   8   6   3    1.61    0.76
   8   6   3    1.23    0.59
   8   6   2    0.75    0.55
   8   6   2   -0.12    0.65
   8   6   1   18.07    1.41
   8   6   1   18.77    1.41
   8   6   0    4.75    0.88
   8   6   0    4.25    0.74
   8   6  -1    4.03    0.83
   8   6  -2    1.43    0.68
   8   6  -3    0.59    0.64
   8   6  -4   13.35    1.34
  -8  -6   5    1.88    0.51
   8   6  -5    1.89    0.81
  -8  -6   6   37.85    2.49
   8   6  -6   32.52    1.85
  -8  -6   7    8.57    1.37
   8   6  -7   10.63    1.21
  -8  -6   8    2.61    1.15
   8   6  -8    1.08    0.74
  -8  -6   9   13.90    1.76
   8   6  -9   15.19    1.48
  -8  -6  10    1.18    1.26
   8   6 -10    3.75    0.97
  -8  -6  11    9.42    1.71
   8   6 -11   12.70    1.45
  -8  -6  12    5.08    1.62
   8   6 -12    4.56    1.13
  -8  -6  13    0.12    1.37
  -8  -6  14    4.08    1.70
   7   6  14   -0.45    0.95
   7   6  13    1.15    1.03
   7   6  12    9.28    1.50
   7   6  11    5.97    1.22
   7   6  10    1.02    0.86
   7   6   9   -0.25    0.68
   7   6   8   19.00    1.64
   7   6   8   18.28    1.58
   7   6   7    5.79    1.07
   7   6   7    5.11    0.93
   7   6   6    0.29    0.59
   7   6   6    0.68    0.80
   7   6   5   22.54    1.64
   7   6   5   22.21    1.55
   7   6   4    1.16    0.55
   7   6   4    0.21    0.72
   7   6   3    0.24    0.65
   7   6   3    0.51    0.48
   7   6   2   14.37    1.27
   7   6   2   14.32    1.22
   7   6   1    4.66    0.82
   7   6   1    4.10    0.68
   7   6   0    7.51    0.86
   7   6   0    9.13    0.99
   7   6  -1   27.93    1.55
   7   6  -2    7.63    0.92
   7   6  -3   46.70    1.95
   7   6  -4    3.02    0.74
  -7  -6   5   28.24    1.16
   7   6  -5   26.91    1.69
  -7  -6   6   23.40    2.13
   7   6  -6   21.95    1.53
  -7  -6   7   -0.01    1.03
   7   6  -7   -0.26    0.63
  -7  -6   8   16.54    1.70
   7   6  -8   20.00    1.44
  -7  -6   9    3.60    1.24
   7   6  -9    4.13    0.88
  -7  -6  10    1.56    1.24
   7   6 -10    2.03    0.80
  -7  -6  11    5.72    1.47
   7   6 -11    7.02    1.16
  -7  -6  12    1.75    1.35
   7   6 -12    5.40    1.13
  -7  -6  13    0.05    1.32
  -7  -6  14   -2.07    1.33
  -7  -6  15   -0.68    1.40
   6   6  14    1.44    1.08
   6   6  13    0.28    0.95
   6   6  12    2.79    1.09
   6   6  11    8.67    1.39
   6   6  10    3.62    1.01
   6   6   9   22.30    1.79
   6   6   9   18.11    1.81
   6   6   8   -0.91    0.80
   6   6   8    0.83    0.68
   6   6   7    0.13    0.80
   6   6   7    0.25    0.59
   6   6   6   38.71    1.97
   6   6   6   36.29    1.85
   6   6   5    1.91    0.63
   6   6   5    2.41    0.86
   6   6   4   34.26    1.65
   6   6   4   37.80    1.80
   6   6   3   17.90    1.23
   6   6   3   18.22    1.33
   6   6   2   -0.31    0.53
   6   6   2   -0.49    0.34
   6   6   1    2.23    0.64
   6   6   1    1.43    0.48
   6   6   0  245.22    5.21
   6   6   0  241.27    5.10
   6   6  -1    3.33    0.67
   6   6  -2    3.02    0.66
   6   6  -3   20.66    1.32
  -6  -6   4   17.16    1.06
   6   6  -4   17.91    1.29
  -6  -6   5   12.45    0.87
  -6  -6   5   11.72    1.27
   6   6  -5   13.61    1.22
  -6  -6   6   17.57    1.57
  -6  -6   6   15.93    0.80
   6   6  -6   17.80    1.32
  -6  -6   7   25.63    2.17
   6   6  -7   23.28    1.53
  -6  -6   8    4.33    1.20
   6   6  -8    3.07    0.81
  -6  -6   9   -0.25    0.99
   6   6  -9   -1.19    0.56
  -6  -6  10   18.04    1.88
   6   6 -10   20.14    1.51
  -6  -6  11    0.66    1.17
   6   6 -11    0.48    0.77
  -6  -6  12    3.21    1.36
   6   6 -12    6.26    1.13
  -6  -6  13   -0.18    1.26
  -6  -6  14   -0.67    1.27
  -6  -6  15    1.37    1.41
   5   6  14    0.19    0.97
   5   6  13    5.54    1.28
   5   6  12   34.40    2.37
   5   6  11    0.21    0.79
   5   6  10    0.21    0.78
   5   6  10   -0.80    0.97
   5   6   9    0.14    0.93
   5   6   9   -0.54    0.58
   5   6   8    0.09    0.57
   5   6   8   -0.30    0.83
   5   6   7   -0.07    0.85
   5   6   7    0.71    0.63
   5   6   6    1.99    0.68
   5   6   6    2.42    0.90
   5   6   5   29.49    1.57
   5   6   5   28.55    1.73
   5   6   4   14.36    1.36
   5   6   4   14.33    1.11
   5   6   3    6.80    0.88
   5   6   3    5.71    0.68
   5   6   2   26.39    1.36
   5   6   2   22.49    1.19
   5   6   1   10.22    1.01
   5   6   1    9.25    0.91
   5   6   0   87.66    2.37
   5   6   0   88.42    2.44
   5   6  -1   30.08    1.40
   5   6  -2   69.56    2.15
   5   6  -3   51.95    1.83
  -5  -6   4    0.04    0.34
   5   6  -4    0.25    0.49
  -5  -6   5    2.91    0.87
  -5  -6   5    1.86    0.39
   5   6  -5    1.54    0.61
  -5  -6   6   57.23    2.62
  -5  -6   6   53.73    1.36
   5   6  -6   58.64    2.11
  -5  -6   7   17.96    1.64
   5   6  -7   18.81    1.31
  -5  -6   8    2.33    1.10
   5   6  -8    0.67    0.66
  -5  -6   9    2.69    1.14
   5   6  -9    1.92    0.74
  -5  -6  10    1.68    1.12
   5   6 -10    3.07    0.82
  -5  -6  11    2.66    1.25
   5   6 -11    2.73    0.88
  -5  -6  12   11.47    1.68
  -5  -6  13   -1.07    1.14
  -5  -6  14   -0.46    1.23
  -5  -6  15   -1.88    1.20
   4   6  15    1.95    1.17
   4   6  14    4.91    1.28
   4   6  13   -0.40    0.92
   4   6  12   -0.81    0.76
   4   6  11    2.12    0.91
   4   6  10   30.86    2.01
   4   6  10   27.67    2.12
   4   6   9   13.77    1.46
   4   6   9   13.57    1.39
   4   6   8   10.04    1.13
   4   6   8    8.44    1.24
   4   6   7    2.18    0.69
   4   6   7    2.80    1.01
   4   6   6   15.39    1.30
   4   6   6   14.44    1.33
   4   6   5  127.73    3.35
   4   6   5  123.36    3.18
   4   6   4    4.06    0.59
   4   6   4    3.26    0.77
   4   6   3   18.88    1.06
   4   6   3   18.63    1.32
   4   6   2    6.51    0.62
   4   6   2    6.85    0.80
   4   6   1    2.43    0.57
   4   6   1    1.29    0.38
   4   6   0  124.71    2.88
   4   6   0  126.46    3.00
   4   6  -1    6.78    0.72
   4   6  -2   22.52    1.18
  -4  -6   3   56.06    1.53
   4   6  -3   57.89    1.84
  -4  -6   4   12.71    1.07
  -4  -6   4   13.14    0.82
   4   6  -4   14.27    1.06
  -4  -6   5   31.73    1.06
  -4  -6   5   33.19    1.90
   4   6  -5   33.62    1.45
  -4  -6   6   86.83    2.97
  -4  -6   6   79.86    1.79
   4   6  -6   78.21    2.37
  -4  -6   7    0.39    0.93
  -4  -6   7    0.11    0.28
   4   6  -7    0.93    0.57
  -4  -6   8    4.52    1.18
   4   6  -8    6.54    0.90
  -4  -6   9    4.46    1.18
   4   6  -9    7.11    0.94
  -4  -6  10   70.73    3.13
   4   6 -10   72.05    2.44
  -4  -6  11   -0.68    1.01
  -4  -6  12   -0.51    1.04
  -4  -6  13    0.47    1.15
  -4  -6  14    2.77    1.33
  -4  -6  15   -0.45    1.23
   3   6  15   -1.27    0.91
   3   6  14    0.44    1.02
   3   6  13    3.15    1.11
   3   6  12    3.24    1.01
   3   6  11    1.69    0.87
   3   6  11    2.31    1.15
   3   6  10    4.13    0.94
   3   6  10    2.95    1.12
   3   6   9    0.43    0.91
   3   6   9    0.34    0.62
   3   6   8   18.44    1.81
   3   6   8   16.69    1.46
   3   6   7    1.01    0.90
   3   6   7   -0.10    0.50
   3   6   6   21.16    1.69
   3   6   6   19.27    1.31
   3   6   5   13.63    1.40
   3   6   5   14.66    1.07
   3   6   4    7.71    0.92
   3   6   4    7.50    0.71
   3   6   3   20.31    1.29
   3   6   3   20.25    1.02
   3   6   2   56.69    1.61
   3   6   2   54.88    1.82
   3   6   1    9.12    0.74
   3   6   1    9.78    0.94
   3   6   0    6.03    0.54
   3   6   0    6.92    0.70
   3   6  -1    9.47    0.85
  -3  -6   2   81.70    1.93
   3   6  -2   85.43    2.20
  -3  -6   3   91.16    2.49
  -3  -6   3   89.19    2.02
   3   6  -3   91.26    2.33
  -3  -6   4  105.06    2.84
  -3  -6   4  100.81    2.17
   3   6  -4  101.00    2.53
  -3  -6   5   20.38    1.51
  -3  -6   5   21.33    0.89
   3   6  -5   19.32    1.11
  -3  -6   6   -0.08    0.27
  -3  -6   6    0.34    0.77
   3   6  -6   -0.06    0.45
  -3  -6   7   49.82    2.38
  -3  -6   7   46.22    1.33
   3   6  -7   47.54    1.70
  -3  -6   8   19.98    2.00
  -3  -6   8   22.28    0.98
   3   6  -8   21.59    1.28
  -3  -6   9    1.92    0.99
   3   6  -9    0.20    0.61
  -3  -6  10    0.55    0.94
   3   6 -10   -0.46    0.61
  -3  -6  11    0.33    0.97
  -3  -6  12   26.88    2.27
  -3  -6  13   -1.43    0.99
  -3  -6  14   -0.17    1.11
  -3  -6  15   -2.57    1.07
   2   6  15    3.40    1.23
   2   6  14   -0.51    0.92
   2   6  13   -1.06    0.83
   2   6  12    3.36    0.99
   2   6  11   -1.35    1.03
   2   6  11    0.76    0.78
   2   6  10   69.34    2.71
   2   6  10   59.81    2.72
   2   6   9    6.26    1.23
   2   6   9    6.62    0.98
   2   6   8    5.30    0.87
   2   6   8    5.24    1.14
   2   6   7    0.55    0.91
   2   6   7   -0.20    0.52
   2   6   6   17.01    1.63
   2   6   6   17.58    1.17
   2   6   5   88.24    2.65
   2   6   5   86.47    2.32
   2   6   4   44.01    1.76
   2   6   4   40.62    1.39
   2   6   3    0.58    0.57
   2   6   3    0.16    0.27
   2   6   2   10.79    1.03
   2   6   2   10.30    0.68
   2   6   1   20.00    0.85
   2   6   1   20.15    1.13
   2   6   0   76.37    2.02
   2   6  -1   27.37    1.13
  -2  -6   2   10.52    0.79
  -2  -6   2   10.36    0.99
   2   6  -2   10.50    0.79
  -2  -6   3    8.77    0.72
  -2  -6   3    8.74    0.78
   2   6  -3    9.25    0.78
  -2  -6   4   44.88    1.76
  -2  -6   4   46.66    1.31
   2   6  -4   45.72    1.47
  -2  -6   5    0.56    0.30
  -2  -6   5    0.12    0.59
   2   6  -5   -0.26    0.35
  -2  -6   6   42.74    2.07
  -2  -6   6   42.44    1.29
   2   6  -6   43.32    1.48
  -2  -6   7    2.72    0.90
  -2  -6   7    2.68    0.43
   2   6  -7    2.89    0.58
  -2  -6   8    1.01    0.38
  -2  -6   8    0.94    0.90
   2   6  -8    1.01    0.55
  -2  -6   9    5.40    0.62
  -2  -6   9    6.49    1.16
   2   6  -9    6.84    0.82
  -2  -6  10   25.45    2.08
  -2  -6  11   26.56    2.15
  -2  -6  12   -0.28    0.96
  -2  -6  13    0.28    1.04
  -2  -6  14    3.29    1.27
  -2  -6  15   -2.91    1.02
   1   6  15    3.57    1.24
   1   6  14    2.82    1.16
   1   6  13    4.51    1.13
   1   6  12    2.22    0.94
   1   6  12    2.50    1.27
   1   6  11   10.10    1.27
   1   6  11   10.87    1.50
   1   6  10    7.10    1.30
   1   6  10    7.05    1.06
   1   6   9   30.77    2.22
   1   6   9   31.97    1.81
   1   6   8   55.43    2.12
   1   6   8   53.44    2.47
   1   6   7    0.12    0.89
   1   6   7    0.42    0.53
   1   6   6   27.84    1.36
   1   6   6   26.40    1.77
   1   6   5    4.72    0.57
   1   6   5    5.69    0.90
   1   6   4   71.92    2.24
   1   6   4   77.17    1.91
   1   6   3   56.92    1.85
   1   6   3   55.47    1.44
   1   6   2   16.91    1.15
   1   6   2   17.75    0.71
   1   6   1   26.63    0.84
   1   6   1   25.21    1.23
   1   6   0   77.25    2.01
  -1  -6   1    0.51    0.32
  -1  -6   1    0.67    0.35
   1   6  -1    0.99    0.42
  -1  -6   2   54.19    1.61
  -1  -6   2   58.02    1.48
   1   6  -2   57.12    1.55
  -1  -6   3   43.22    1.52
  -1  -6   3   40.73    1.23
   1   6  -3   41.29    1.28
  -1  -6   4    0.88    0.31
  -1  -6   4    0.76    0.57
   1   6  -4    1.03    0.36
  -1  -6   5   23.15    1.50
  -1  -6   5   21.49    0.96
   1   6  -5   22.79    0.96
  -1  -6   6    4.06    0.82
  -1  -6   6    4.01    0.47
   1   6  -6    3.83    0.51
  -1  -6   7   33.37    1.26
  -1  -6   7   34.25    2.01
   1   6  -7   32.15    1.22
  -1  -6   8   21.90    1.14
  -1  -6   8   21.63    1.86
   1   6  -8   19.96    1.10
  -1  -6   9    6.28    0.67
  -1  -6   9    6.15    1.15
  -1  -6  10    5.53    1.08
  -1  -6  10    6.25    0.72
  -1  -6  11   -0.78    0.77
  -1  -6  12    4.45    1.17
  -1  -6  13    8.36    1.45
  -1  -6  14   -2.19    0.92
  -1  -6  15   -0.59    1.08
   0   6  15   -1.62    0.94
   0   6  14    7.48    1.37
   0   6  13    0.04    0.89
   0   6  12    0.49    0.81
   0   6  12   -0.77    1.13
   0   6  11   12.41    1.35
   0   6  11   12.57    1.56
   0   6  10    5.54    1.22
   0   6  10    4.39    0.92
   0   6   9   15.86    1.46
   0   6   9   15.60    1.55
   0   6   8    0.30    0.60
   0   6   8    1.65    1.04
   0   6   7   -0.05    0.50
   0   6   7    0.41    0.89
   0   6   6   22.61    1.23
   0   6   6   22.54    1.68
   0   6   5   25.09    1.51
   0   6   5   24.43    1.11
   0   6   4  154.05    3.56
   0   6   4  153.25    3.10
   0   6   3    2.51    0.63
   0   6   3    2.54    0.31
   0   6   2   77.97    1.57
   0   6   2   76.83    2.13
   0  -6  -1    0.24    0.34
   0   6   1    0.17    0.48
   0  -6   0  294.23    4.95
   0  -6   0  273.64    4.95
   0   6   0  282.79    5.35
   0  -6   1    0.46    0.32
   0  -6   1    0.66    0.32
   0   6  -1    0.38    0.40
   0  -6   2   77.58    1.93
   0  -6   2   78.09    1.82
   0   6  -2   77.47    1.82
   0  -6   3    3.19    0.53
   0  -6   3    2.88    0.40
   0   6  -3    3.56    0.42
   0  -6   4  153.51    3.09
   0  -6   4  159.73    3.53
   0   6  -4  154.76    3.08
   0  -6   5   22.37    0.99
   0  -6   5   23.84    1.46
   0   6  -5   23.20    0.87
   0  -6   6   22.24    1.55
   0  -6   6   21.70    1.06
   0   6  -6   20.95    0.86
   0  -6   7    0.06    0.38
   0  -6   7    1.06    0.74
   0   6  -7    0.12    0.36
   0  -6   8    1.19    0.46
   0  -6   8    0.78    0.80
   0   6  -8    0.72    0.44
   0  -6   9   14.35    1.38
   0  -6   9   13.70    1.13
   0  -6  10    5.04    1.06
   0  -6  10    5.45    0.71
   0  -6  11    9.85    1.34
   0  -6  12   -0.05    0.86
   0  -6  13   -0.16    0.94
   0  -6  14    5.72    1.38
   0  -6  15   -0.36    1.07
  -1   6  15   -0.55    1.00
  -1   6  14   -1.05    0.90
  -1   6  13    8.42    1.29
  -1   6  13    9.08    1.63
  -1   6  12    6.58    1.16
  -1   6  12    5.16    1.41
  -1   6  11   -1.03    1.08
  -1   6  11    0.16    0.80
  -1   6  10    5.57    0.97
  -1   6  10    5.39    1.27
  -1   6   9    5.86    0.97
  -1   6   9    6.28    1.29
  -1   6   8   20.53    1.50
  -1   6   8   25.05    2.01
  -1   6   7   30.60    2.00
  -1   6   7   33.03    1.56
  -1   6   6    4.02    0.60
  -1   6   6    4.18    0.94
  -1   6   5   23.35    1.49
  -1   6   5   23.20    1.08
  -1   6   4    0.65    0.31
  -1   6   4    0.33    0.64
  -1   6   3   41.56    1.03
  -1   6   3   38.95    1.58
   1  -6  -2   60.33    1.62
  -1   6   2   58.61    1.83
   1  -6  -1    0.28    0.30
  -1   6   1    0.63    0.50
   1  -6   0   74.84    1.75
   1  -6   0   74.86    1.44
  -1   6   0   73.35    1.89
   1  -6   1   26.47    1.03
   1  -6   1   26.81    0.89
  -1   6  -1   25.00    1.09
   1  -6   2   18.70    0.90
   1  -6   2   17.46    0.86
  -1   6  -2   19.07    0.87
   1  -6   3   59.91    1.58
   1  -6   3   56.50    1.69
  -1   6  -3   55.03    1.36
   1  -6   4   75.00    2.14
   1  -6   4   75.49    1.88
  -1   6  -4   72.88    1.60
   1  -6   5    5.97    0.77
   1  -6   5    5.07    0.55
  -1   6  -5    6.08    0.48
   1  -6   6   22.00    1.11
   1  -6   6   26.65    1.57
   1  -6   7    0.47    0.66
   1  -6   7    1.13    0.43
   1  -6   8   53.29    1.82
   1  -6   8   52.38    2.33
   1  -6   9   29.33    1.44
   1  -6   9   26.02    1.82
   1  -6  10    6.86    0.81
   1  -6  10    6.54    1.12
   1  -6  11    8.89    1.28
   1  -6  12    2.75    1.06
   1  -6  13    2.66    1.10
   1  -6  14    2.99    1.20
   1  -6  15    3.60    1.32
  -2   6  15   -1.86    0.88
  -2   6  14    2.55    1.13
  -2   6  13   -0.53    0.85
  -2   6  13    0.88    1.28
  -2   6  12    0.50    1.18
  -2   6  12    0.37    0.91
  -2   6  11   24.55    1.83
  -2   6  11   24.95    2.17
  -2   6  10   28.93    1.84
  -2   6  10   30.89    2.21
  -2   6   9    5.99    0.92
  -2   6   9    7.95    1.36
  -2   6   8    2.21    0.73
  -2   6   8    1.28    1.06
  -2   6   7    2.37    0.64
  -2   6   7    2.32    1.02
  -2   6   6   45.64    1.61
  -2   6   5    0.74    0.41
  -2   6   5    0.05    0.71
  -2   6   4   46.83    1.31
   2  -6  -3   10.42    0.84
  -2   6   3    8.89    0.87
  -2   6   3    8.96    0.57
   2  -6  -2   10.71    0.79
  -2   6   2   10.44    1.05
   2  -6  -1   27.60    1.02
  -2   6   1   28.10    1.29
   2  -6   0   73.67    1.47
   2  -6   0   77.31    1.80
  -2   6   0   77.15    1.93
   2  -6   1   19.56    0.90
   2  -6   1   20.37    0.75
  -2   6  -1   21.32    0.98
   2  -6   2   10.53    0.72
   2  -6   2    9.48    0.74
  -2   6  -2   10.00    0.74
   2  -6   3    0.08    0.29
   2  -6   3    0.73    0.35
  -2   6  -3    0.06    0.28
   2  -6   4   40.18    1.40
   2  -6   4   42.26    1.55
   2  -6   5   85.98    2.20
   2  -6   5   87.01    2.48
   2  -6   6   15.86    1.07
   2  -6   6   16.53    1.38
   2  -6   7    0.15    0.44
   2  -6   7   -0.16    0.62
   2  -6   8    5.00    0.92
   2  -6   8    4.07    0.67
   2  -6   9    7.92    1.12
   2  -6   9    6.58    0.80
   2  -6  10   60.94    2.15
   2  -6  10   53.78    2.55
   2  -6  11    0.97    0.87
   2  -6  12    1.39    0.90
   2  -6  13    0.04    0.96
   2  -6  14   -1.04    0.91
   2  -6  15    3.06    1.24
  -3   6  15   -1.93    1.01
  -3   6  14   -1.05    1.32
  -3   6  14   -0.99    0.96
  -3   6  13   -1.63    0.84
  -3   6  13    0.70    1.28
  -3   6  12   25.40    1.97
  -3   6  12   27.51    2.31
  -3   6  11   -1.20    0.72
  -3   6  11   -0.01    1.13
  -3   6  10   -0.31    1.03
  -3   6  10   -0.59    0.73
  -3   6   9    0.41    0.74
  -3   6   9    1.53    1.09
  -3   6   8   22.17    1.54
  -3   6   8   23.93    2.00
  -3   6   7   47.79    1.83
  -3   6   7   44.38    2.13
   3  -6  -6   -0.30    0.42
  -3   6   6    0.24    0.52
  -3   6   6   -0.41    0.79
   3  -6  -5   21.75    1.09
  -3   6   5   20.84    1.13
   3  -6  -4   98.37    2.18
  -3   6   4   95.35    2.15
  -3   6   4   95.09    2.60
   3  -6  -3   85.21    1.95
  -3   6   3   84.77    2.29
  -3   6   3   84.12    1.81
   3  -6  -2   78.43    1.83
  -3   6   2   77.38    1.55
   3  -6  -1    9.63    0.73
  -3   6   1    7.77    0.73
   3  -6   0    5.89    0.52
   3  -6   0    5.94    0.45
  -3   6   0    5.86    0.62
   3  -6   1    8.55    0.73
   3  -6   1    8.80    0.59
  -3   6  -1    8.25    0.81
   3  -6   2   54.99    1.51
   3  -6   2   53.20    1.55
  -3   6  -2   55.65    1.42
   3  -6   3   20.41    1.04
   3  -6   3   19.68    1.04
  -3   6  -3   19.05    0.78
   3  -6   4    6.21    0.63
   3  -6   4    7.77    0.74
   3  -6   5   12.08    0.95
   3  -6   5   12.56    1.15
   3  -6   6   17.88    1.40
   3  -6   6   18.74    1.19
   3  -6   7   -0.31    0.43
   3  -6   7    1.12    0.67
   3  -6   8   16.73    1.53
   3  -6   8   17.95    1.30
   3  -6   9   -0.37    0.66
   3  -6   9    0.29    0.54
   3  -6  10    2.65    0.91
   3  -6  10    2.82    0.72
   3  -6  11    0.71    0.82
   3  -6  12    3.38    1.07
   3  -6  13    1.13    0.99
   3  -6  14    1.35    1.09
   3  -6  15   -2.11    0.86
  -4   6  14   -0.40    1.00
  -4   6  14    0.43    1.42
  -4   6  13   -0.86    0.86
  -4   6  13    0.36    1.24
  -4   6  12   -0.95    1.11
  -4   6  12   -0.97    0.84
  -4   6  11    0.33    0.86
  -4   6  11    0.37    1.10
  -4   6  10   66.46    2.57
  -4   6   9    4.60    0.93
  -4   6   9    3.08    1.12
   4  -6  -8    4.75    0.65
  -4   6   8    4.04    1.16
  -4   6   8    6.63    0.97
   4  -6  -7   -0.02    0.43
  -4   6   7    0.86    0.69
  -4   6   7    0.72    0.95
   4  -6  -6   80.06    2.00
  -4   6   6   79.39    2.61
  -4   6   6   79.45    2.30
   4  -6  -5   31.31    1.19
  -4   6   5   33.15    1.68
  -4   6   5   33.41    1.41
   4  -6  -4   13.84    0.88
  -4   6   4   13.48    1.21
  -4   6   4   13.17    0.99
   4  -6  -3   55.41    1.48
  -4   6   3   54.16    1.45
  -4   6   3   54.96    1.86
   4  -6  -2   19.75    0.90
  -4   6   2   20.91    1.18
   4  -6  -1    5.83    0.50
   4  -6  -1    7.11    0.50
  -4   6   1    7.02    0.71
   4  -6   0  121.39    2.44
   4  -6   0  121.07    2.59
  -4   6   0  115.60    2.64
   4  -6   1    1.89    0.39
   4  -6   1    1.53    0.32
  -4   6  -1    1.51    0.46
   4  -6   2    7.08    0.72
   4  -6   2    5.43    0.58
  -4   6  -2    5.58    0.56
   4  -6   3   18.43    1.07
   4  -6   3   17.87    1.05
  -4   6  -3   18.40    0.82
   4  -6   4    3.25    0.54
   4  -6   4    3.24    0.56
   4  -6   5  124.70    3.20
   4  -6   5  120.63    2.95
   4  -6   6   14.19    1.12
   4  -6   6   14.25    1.30
   4  -6   7    1.23    0.69
   4  -6   7    2.80    0.63
   4  -6   8    8.12    0.89
   4  -6   8    7.06    1.03
   4  -6   9   12.31    1.31
   4  -6   9   12.63    1.12
   4  -6  10   28.04    1.67
   4  -6  10   27.18    1.93
   4  -6  11    1.68    0.90
   4  -6  12    0.28    0.86
   4  -6  13    2.85    1.09
   4  -6  14    3.74    1.22
   4  -6  15    1.15    1.12
  -5   6  15    0.44    1.54
  -5   6  14    0.87    1.44
  -5   6  14   -2.96    0.94
  -5   6  13   -1.47    0.91
  -5   6  13   -0.24    1.32
  -5   6  12   12.21    1.46
  -5   6  11    0.76    0.90
  -5   6  11    2.97    1.19
  -5   6  10    2.09    0.90
  -5   6  10    3.51    1.18
  -5   6   9    3.93    1.11
  -5   6   9    1.46    0.85
  -5   6   8    1.04    0.84
  -5   6   8    0.65    1.04
   5  -6  -7   19.68    1.05
  -5   6   7   17.77    1.70
  -5   6   7   18.35    1.60
   5  -6  -6   53.78    1.52
  -5   6   6   55.25    2.04
  -5   6   6   55.39    2.25
   5  -6  -5    2.53    0.42
  -5   6   5    1.34    0.78
  -5   6   5    1.98    0.63
   5  -6  -4    0.00    0.29
  -5   6   4   -0.99    0.60
  -5   6   4   -0.49    0.46
   5  -6  -3   49.99    1.41
  -5   6   3   49.21    1.81
   5  -6  -2   68.20    1.74
  -5   6   2   66.62    2.06
   5  -6  -1   28.86    1.12
   5  -6  -1   28.41    0.98
  -5   6   1   28.84    1.28
   5  -6   0   87.43    2.01
   5  -6   0   86.04    2.11
  -5   6   0   80.45    2.13
   5  -6   1    9.66    0.83
   5  -6   1   10.07    0.76
  -5   6  -1    9.72    0.84
   5  -6   2   22.61    1.07
   5  -6   2   23.56    1.14
  -5   6  -2   21.12    0.97
   5  -6   3    6.81    0.70
   5  -6   3    5.71    0.64
  -5   6  -3    6.60    0.54
   5  -6   4   15.65    1.14
   5  -6   4   12.95    1.11
   5  -6   5   28.72    1.45
   5  -6   5   27.04    1.52
   5  -6   6    1.37    0.54
   5  -6   6    0.63    0.61
   5  -6   7    0.68    0.64
   5  -6   7   -0.14    0.50
   5  -6   8    0.78    0.66
   5  -6   8    0.66    0.56
   5  -6   9    0.74    0.74
   5  -6   9    0.55    0.60
   5  -6  10    0.14    0.71
   5  -6  11   -0.49    0.74
   5  -6  12   29.57    2.26
   5  -6  13    4.69    1.26
   5  -6  14    0.72    1.06
  -6   6  15    3.17    1.65
  -6   6  14   -0.41    1.40
  -6   6  13    2.71    1.39
  -6   6  13    2.81    1.14
  -6   6  12    3.10    1.10
  -6   6  12    5.23    1.37
  -6   6  11    0.09    0.89
  -6   6  11    1.81    1.17
  -6   6  10   23.56    2.02
  -6   6  10   16.54    1.48
  -6   6   9   -0.08    0.80
  -6   6   9    0.32    0.94
  -6   6   8    2.05    1.04
  -6   6   8    1.68    0.87
   6  -6  -7   25.02    1.07
  -6   6   7   26.35    1.87
  -6   6   7   27.73    1.90
   6  -6  -6   16.31    0.93
  -6   6   6   19.84    1.62
  -6   6   6   13.15    1.35
   6  -6  -5   13.16    0.86
  -6   6   5   11.43    0.97
  -6   6   5   12.94    1.27
   6  -6  -4   18.91    0.97
  -6   6   4   14.63    1.38
  -6   6   4   18.24    1.26
   6  -6  -3   19.35    0.95
  -6   6   3   19.72    1.32
   6  -6  -2    2.30    0.43
  -6   6   2    2.37    0.67
   6  -6  -1    2.54    0.45
   6  -6  -1    2.84    0.41
  -6   6   1    3.61    0.66
   6  -6   0  235.85    4.53
   6  -6   0  237.38    4.61
  -6   6   0  230.14    4.65
   6  -6   1    2.60    0.47
   6  -6   1    2.59    0.51
  -6   6  -1    0.98    0.50
   6  -6   2   -0.04    0.37
   6  -6   2    0.29    0.35
  -6   6  -2   -0.27    0.42
   6  -6   3   18.07    1.24
   6  -6   3   16.85    1.14
  -6   6  -3   17.29    0.90
   6  -6   4   35.92    1.65
   6  -6   4   37.75    1.65
   6  -6   5    2.31    0.68
   6  -6   5    2.50    0.62
   6  -6   6   38.89    1.92
   6  -6   6   35.73    1.71
   6  -6   7    0.57    0.65
   6  -6   7    0.14    0.56
   6  -6   8    0.78    0.71
   6  -6   8   -0.19    0.55
   6  -6   9   18.83    1.53
   6  -6   9   17.21    1.68
   6  -6  10    3.55    1.01
   6  -6  11    7.75    1.33
   6  -6  12    2.50    1.07
   6  -6  13   -0.97    0.86
   6  -6  14    2.02    1.12
  -7   6  15    3.38    1.69
  -7   6  14    0.55    1.42
  -7   6  13    2.36    1.37
  -7   6  12    2.43    1.13
  -7   6  12    5.03    1.42
  -7   6  11    5.31    1.21
  -7   6  11    6.74    1.39
  -7   6  10   -0.94    0.89
  -7   6  10    0.45    1.06
  -7   6   9    4.87    1.17
  -7   6   9    2.07    0.95
  -7   6   8   24.71    1.82
  -7   6   8   18.99    1.75
  -7   6   7    1.17    0.89
  -7   6   7   -0.39    0.97
   7  -6  -6   23.01    1.03
  -7   6   6   24.95    1.82
  -7   6   6   24.37    1.79
   7  -6  -5   25.89    1.10
  -7   6   5   25.34    1.72
  -7   6   5   28.73    1.65
   7  -6  -4    1.05    0.39
  -7   6   4    1.33    0.84
   7  -6  -3   45.70    1.47
  -7   6   3   43.17    1.92
   7  -6  -2    6.86    0.65
  -7   6   2    5.53    0.88
   7  -6  -1   27.16    1.23
   7  -6  -1   25.10    1.16
  -7   6   1   24.77    1.33
   7  -6   0    7.93    0.74
   7  -6   0   10.56    0.91
  -7   6   0    8.00    0.84
   7  -6   1    5.31    0.63
   7  -6   1    4.97    0.64
  -7   6  -1    5.70    0.72
   7  -6   2   13.53    1.06
   7  -6   2   13.25    1.10
  -7   6  -2   13.69    0.96
   7  -6   3    0.03    0.46
   7  -6   3   -0.17    0.41
  -7   6  -3    0.20    0.48
   7  -6   4    0.75    0.52
   7  -6   4    0.35    0.51
  -7   6  -4    1.18    0.44
   7  -6   5   21.97    1.47
   7  -6   5   19.78    1.47
   7  -6   6    1.11    0.65
   7  -6   6    0.32    0.57
   7  -6   7    5.45    0.84
   7  -6   7    4.52    0.91
   7  -6   8   17.09    1.64
   7  -6   8   17.00    1.49
   7  -6   9   -0.19    0.71
   7  -6   9    0.17    0.67
   7  -6  10    1.67    0.88
   7  -6  11    4.83    1.17
   7  -6  12    8.29    1.47
   7  -6  13    0.53    0.98
   7  -6  14   -0.50    1.00
  -8   6  14    6.97    1.68
  -8   6  13    3.41    1.49
  -8   6  12    3.95    1.36
  -8   6  11   11.88    1.58
  -8   6  11   10.13    1.46
  -8   6  10    4.72    1.25
  -8   6  10    2.66    1.09
  -8   6   9   19.48    1.80
  -8   6   9   12.85    1.41
  -8   6   8    2.63    1.04
  -8   6   8    1.76    0.92
  -8   6   7    9.68    1.31
  -8   6   7   10.33    1.18
  -8   6   6   28.79    1.90
  -8   6   6   32.42    1.99
   8  -6  -5    2.71    0.48
  -8   6   5    2.15    0.80
  -8   6   5    3.56    1.02
   8  -6  -4   14.13    0.99
  -8   6   4   14.64    1.36
   8  -6  -3    0.71    0.41
  -8   6   3    0.18    0.82
   8  -6  -2    1.00    0.74
   8  -6  -2    1.08    0.44
  -8   6   2    0.77    0.78
   8  -6  -1    2.84    0.57
   8  -6  -1    2.49    0.52
   8  -6  -1    3.86    0.83
  -8   6   1    3.07    0.82
   8  -6   0    4.13    0.61
   8  -6   0    5.85    0.86
   8  -6   0    4.10    0.64
  -8   6   0    4.05    0.79
   8  -6   1   17.80    1.21
   8  -6   1   17.33    1.24
   8  -6   1   18.14    1.21
  -8   6  -1   19.41    1.30
   8  -6   2   -0.59    0.44
   8  -6   2   -0.33    0.39
  -8   6  -2    0.34    0.57
   8  -6   3    0.81    0.52
   8  -6   3    1.02    0.58
  -8   6  -3    0.21    0.52
   8  -6   4   17.45    1.40
   8  -6   4   17.32    1.35
   8  -6   5   28.56    1.68
   8  -6   5   28.99    1.70
   8  -6   6   66.83    2.43
   8  -6   6   71.99    2.66
   8  -6   7   30.51    1.80
   8  -6   7   24.87    1.78
   8  -6   8    2.30    0.84
   8  -6   8    1.29    0.74
   8  -6   9    6.16    1.16
   8  -6  10    4.83    1.12
   8  -6  11   -0.51    0.82
   8  -6  12   -0.69    0.84
   8  -6  13   -0.51    0.90
  -9   6  14    1.12    1.41
  -9   6  13    3.30    1.40
  -9   6  12   11.14    1.71
  -9   6  11    2.33    1.21
  -9   6  10   -1.89    0.98
  -9   6  10   -0.10    1.04
  -9   6   9   -1.14    0.96
  -9   6   9    0.84    1.04
  -9   6   8   26.33    2.03
  -9   6   8   26.24    2.00
  -9   6   7    4.56    1.03
  -9   6   7    5.16    1.13
  -9   6   6    2.20    0.99
  -9   6   6    2.15    0.85
   9  -6  -5    2.01    0.47
  -9   6   5   -1.01    0.90
   9  -6  -4    0.04    0.40
  -9   6   4    0.08    0.90
   9  -6  -3    1.86    0.87
   9  -6  -3    1.35    0.49
  -9   6   3    0.61    0.89
   9  -6  -2   71.16    2.11
   9  -6  -2   65.28    2.43
  -9   6   2   73.19    2.50
   9  -6  -1    7.11    0.78
   9  -6  -1    7.07    0.81
   9  -6  -1    8.50    1.07
  -9   6   1    8.69    1.07
   9  -6   0   20.17    1.44
   9  -6   0   20.66    1.37
   9  -6   0   22.64    1.33
  -9   6   0   19.52    1.49
   9  -6   1   36.12    1.69
   9  -6   1   42.63    1.76
   9  -6   1   44.29    1.80
  -9   6  -1   41.33    1.73
   9  -6   2    1.03    0.65
   9  -6   2    1.02    0.56
   9  -6   2    0.79    0.53
  -9   6  -2    1.13    0.65
   9  -6   3    2.69    0.71
   9  -6   3    3.82    0.76
  -9   6  -3    2.27    0.64
   9  -6   4    2.38    0.68
   9  -6   4    0.84    0.55
   9  -6   5    1.02    0.64
   9  -6   5    2.47    0.73
   9  -6   6   11.87    1.30
   9  -6   6   11.00    1.13
   9  -6   7    1.78    0.76
   9  -6   7    1.59    0.76
   9  -6   8    4.03    1.01
   9  -6   9    0.46    0.78
   9  -6  10    0.50    0.82
   9  -6  11    5.66    1.28
   9  -6  12    2.54    1.11
 -10   6  13    1.53    1.36
 -10   6  12    2.32    1.34
 -10   6  11   14.11    1.75
 -10   6  10    1.94    1.20
 -10   6  10    2.69    1.19
 -10   6   9   10.73    1.51
 -10   6   9    9.86    1.40
 -10   6   8   -0.87    0.96
 -10   6   8   -0.14    0.96
 -10   6   7    6.25    1.16
 -10   6   7    7.89    1.29
 -10   6   6   45.00    2.27
 -10   6   6   44.00    2.20
 -10   6   5   -0.66    0.84
  10  -6  -4   11.42    1.02
  10  -6  -4    7.95    1.26
 -10   6   4    8.98    1.25
  10  -6  -3    3.51    0.63
  10  -6  -3    3.57    1.00
 -10   6   3    3.81    1.05
  10  -6  -2    0.68    0.49
  10  -6  -2    0.53    0.81
 -10   6   2    1.03    0.89
  10  -6  -1    2.37    0.86
  10  -6  -1    1.18    0.55
  10  -6  -1    0.71    0.52
  10  -6   0   20.09    1.37
  10  -6   0   17.44    1.46
  10  -6   0   17.60    1.31
  10  -6   1    1.42    0.56
  10  -6   1    1.26    0.60
  10  -6   1    0.75    0.72
  10  -6   2    1.62    0.70
  10  -6   2    1.85    0.63
  10  -6   2    1.60    0.63
 -10   6  -2    1.08    0.67
  10  -6   3    1.93    0.69
  10  -6   3    1.78    0.64
  10  -6   4   27.20    1.67
  10  -6   4   25.29    1.61
  10  -6   5   42.30    2.12
  10  -6   5   38.42    2.03
  10  -6   6    8.07    1.12
  10  -6   6    8.39    1.15
  10  -6   7    1.40    0.78
  10  -6   8    2.09    0.91
  10  -6   9   -0.08    0.78
  10  -6  10   15.46    1.80
  10  -6  11   -0.08    0.95
  10  -6  12   -0.64    0.91
 -11   6  13    2.16    1.43
 -11   6  12   25.72    2.36
 -11   6  11    0.36    1.20
 -11   6  10    3.63    1.32
 -11   6   9    4.39    1.26
 -11   6   8    5.58    1.26
 -11   6   8    4.88    1.21
 -11   6   7   11.25    1.34
 -11   6   7   15.43    1.63
 -11   6   6    0.99    0.88
 -11   6   6    1.43    1.01
 -11   6   5   -0.45    0.87
  11  -6  -4   -0.06    0.90
 -11   6   4    1.12    0.93
  11  -6  -3    0.29    0.86
  11  -6  -3    0.16    0.47
 -11   6   3    0.98    0.89
  11  -6  -2   45.94    2.20
  11  -6  -2   47.50    1.87
  11  -6  -1    1.94    0.89
  11  -6  -1    2.01    0.65
  11  -6  -1    2.76    0.67
  11  -6   0    3.70    0.73
  11  -6   0    3.23    0.91
  11  -6   0    4.59    0.79
  11  -6   1    8.12    1.07
  11  -6   1    8.56    1.01
  11  -6   1    6.77    0.91
  11  -6   2    4.64    0.87
  11  -6   2    2.52    0.71
  11  -6   2    3.84    0.80
  11  -6   3   10.49    1.16
  11  -6   3   10.95    1.17
  11  -6   4    0.56    0.68
  11  -6   4    0.51    0.59
  11  -6   5    0.72    0.77
  11  -6   5    0.80    0.67
  11  -6   6    0.02    0.65
  11  -6   7   -0.22    0.67
  11  -6   8    0.96    0.82
  11  -6   9    6.00    1.25
  11  -6  10    0.49    0.91
  11  -6  11    1.56    1.07
 -12   6  12    4.54    1.46
 -12   6  11    2.31    1.37
 -12   6  10    5.79    1.47
 -12   6   9    1.29    1.16
 -12   6   8    5.71    1.31
 -12   6   7    1.59    1.10
 -12   6   7    1.11    0.97
 -12   6   6    1.13    1.05
  12  -6  -5   18.11    1.83
 -12   6   5   19.44    1.85
  12  -6  -4    5.71    1.29
 -12   6   4    7.00    1.24
  12  -6  -3   23.62    1.48
  12  -6  -3   16.90    1.75
 -12   6   3   26.01    1.84
  12  -6  -2   11.56    1.06
  12  -6  -2   12.52    1.50
  12  -6  -1    0.74    0.62
  12  -6  -1    2.28    0.94
  12  -6  -1    2.25    0.67
  12  -6   0   50.07    2.15
  12  -6   0   50.38    2.16
  12  -6   0   46.49    2.21
  12  -6   1    0.53    0.82
  12  -6   1    0.66    0.60
  12  -6   1    0.97    0.67
  12  -6   2    1.26    0.73
  12  -6   2    0.65    0.64
  12  -6   3   23.58    1.78
  12  -6   3   25.65    1.72
  12  -6   4   -0.44    0.72
  12  -6   4    0.10    0.64
  12  -6   5    7.63    1.15
  12  -6   6    1.05    0.80
  12  -6   7    0.75    0.80
  12  -6   8    0.31    0.80
  12  -6   9   -0.50    0.77
  12  -6  10   15.42    1.91
 -13   6  11    4.39    1.50
 -13   6  10    2.60    1.35
 -13   6   9    0.15    1.14
 -13   6   8    6.95    1.41
 -13   6   7    2.46    1.22
 -13   6   6    6.49    1.33
  13  -6  -5    0.46    1.05
 -13   6   5    0.05    0.98
  13  -6  -4   -0.35    0.97
 -13   6   4    1.02    1.04
  13  -6  -3    7.09    1.33
 -13   6   3    9.29    1.36
  13  -6  -2   16.67    1.43
  13  -6  -2   14.20    1.59
  13  -6  -1    1.26    0.74
  13  -6  -1   -0.14    0.85
  13  -6  -1    0.88    0.63
  13  -6   0    0.65    0.65
  13  -6   0   -0.24    0.55
  13  -6   0    0.09    0.86
  13  -6   1    1.56    0.77
  13  -6   1    0.43    0.61
  13  -6   1    0.32    0.87
  13  -6   2    1.56    0.81
  13  -6   2    3.23    0.83
  13  -6   3    4.53    0.93
  13  -6   4   20.53    1.74
  13  -6   5    3.21    0.94
  13  -6   6    2.89    0.95
  13  -6   7   12.70    1.59
  13  -6   8    0.05    0.84
  13  -6   9    5.31    1.29
 -14   6  10    6.16    1.59
 -14   6   9    1.97    1.29
 -14   6   8    2.28    1.22
 -14   6   7    1.49    1.21
 -14   6   6    2.48    1.17
  14  -6  -5   17.91    1.98
 -14   6   5   22.49    2.04
  14  -6  -4    1.61    1.17
 -14   6   4    4.12    1.21
  14  -6  -3   -0.97    0.96
 -14   6   3    1.90    1.06
  14  -6  -2    5.29    1.27
 -14   6   2    9.48    1.36
  14  -6  -1   -0.71    0.89
  14  -6   0    6.82    1.27
  14  -6   0    6.79    1.08
  14  -6   1    2.20    0.81
  14  -6   2    0.11    0.66
  14  -6   3    0.41    0.66
  14  -6   4   19.92    1.77
  14  -6   5    3.61    1.05
  14  -6   6    6.58    1.26
  14  -6   7    4.24    1.11
  14  -6   8    2.06    0.97
 -15   6   9    0.78    1.25
 -15   6   8   24.23    2.20
 -15   6   7    0.06    1.18
 -15   6   6    1.57    1.23
 -15   6   5    2.84    1.25
  15  -6  -4   -0.20    1.10
 -15   6   4    0.00    1.09
  15  -6  -3    1.71    1.18
 -15   6   3    4.21    1.21
  15  -6  -2   -0.46    0.97
 -15   6   2    0.82    1.01
  15  -6  -1   12.26    1.62
 -15   6   1   20.98    1.88
  15  -6   0   -0.94    0.94
  15  -6   0    0.54    0.74
 -15   6   0    2.14    0.95
  15  -6   1    0.37    0.73
  15  -6   2    8.71    1.26
  15  -6   3   -0.67    0.67
  15  -6   4    7.27    1.24
  15  -6   5    0.13    0.76
  15  -6   6    0.92    0.85
  15  -6   7    5.61    1.25
 -16   6   8    2.36    1.32
 -16   6   7    3.93    1.41
 -16   6   6    1.95    1.28
 -16   6   5    1.11    1.20
 -16   6   4   12.44    1.72
  16  -6  -3   -0.03    1.22
 -16   6   3    3.41    1.26
  16  -6  -2   -0.73    1.11
 -16   6   2    1.05    1.06
  16  -6  -1    4.03    1.34
 -16   6   1    7.96    1.36
  16  -6   1    6.29    1.19
  16  -6   2    0.74    0.79
  16  -6   3    0.74    0.79
  16  -6   4    7.40    1.31
 -17   6   5    2.12    1.27
 -17   6   4    9.09    1.63
 -17   6   3    1.43    1.14
  17  -6  -2    4.50    1.51
 -17   6   2    8.95    1.50
  17  -6   1   -0.96    0.79
  17  -6   2    3.34    1.07
  17  -6   3    2.54    1.05
  17   7   2    1.95    1.11
  17   7   1    3.86    1.28
  17   7   0   21.86    2.12
  17   7  -1    0.18    1.02
  17   7  -2    3.06    1.20
  17   7  -3    0.20    1.01
  17   7  -4    0.27    0.99
  17   7  -5    5.18    1.36
  16   7   5   -0.11    0.88
  16   7   4    3.57    1.13
  16   7   3    4.85    1.37
  16   7   3    7.97    1.40
  16   7   2   -0.02    0.88
  16   7   2    0.89    1.05
  16   7   1    0.57    1.05
  16   7   0    1.72    1.16
  16   7  -1    1.15    1.03
  16   7  -2    4.88    1.30
  16   7  -3   -0.17    0.99
  16   7  -4    3.87    1.25
  16   7  -5    0.20    0.96
  16   7  -6    1.74    1.09
 -16  -7   7    1.80    1.40
  16   7  -7    0.34    0.96
  15   7   7    2.63    1.09
  15   7   6    1.45    0.97
  15   7   5    2.77    1.07
  15   7   4   11.76    1.57
  15   7   4   11.85    1.64
  15   7   3   -0.25    0.81
  15   7   3    0.85    0.98
  15   7   2    9.03    1.42
  15   7   2    7.67    1.42
  15   7   1    0.28    0.92
  15   7   0   12.29    1.67
  15   7  -1    0.14    0.99
  15   7  -2    0.37    0.95
  15   7  -3   -0.06    0.90
  15   7  -4    4.11    1.26
  15   7  -5    3.55    1.17
  15   7  -6    0.38    0.96
 -15  -7   7    2.20    1.45
  15   7  -7    1.71    1.06
 -15  -7   8    0.84    1.45
  15   7  -8    1.82    1.09
 -15  -7   9    2.36    1.62
  15   7  -9    1.32    1.12
  14   7   8   16.97    1.96
  14   7   7    0.81    0.93
  14   7   6    3.11    1.12
  14   7   5    1.69    0.93
  14   7   5    1.90    1.10
  14   7   4    4.67    1.11
  14   7   4    3.73    1.16
  14   7   3   11.86    1.53
  14   7   3    9.76    1.41
  14   7   2    2.93    1.07
  14   7   2    3.07    0.98
  14   7   1    0.47    0.75
  14   7   1    1.22    0.90
  14   7   0    0.39    0.87
  14   7  -1    1.87    1.01
  14   7  -2   15.77    1.77
  14   7  -3    0.53    0.91
  14   7  -4   16.72    1.81
  14   7  -5    1.57    0.99
  14   7  -6    1.40    0.97
 -14  -7   7    6.81    1.65
  14   7  -7    6.62    1.34
 -14  -7   8    7.32    1.67
  14   7  -8    8.20    1.46
 -14  -7   9   -1.44    1.34
  14   7  -9    1.14    1.06
 -14  -7  10    0.84    1.61
  14   7 -10    2.57    1.16
  13   7   9    1.42    1.02
  13   7   8    4.11    1.14
  13   7   7    4.47    1.18
  13   7   6   13.21    1.62
  13   7   5    8.88    1.41
  13   7   5    8.15    1.27
  13   7   4   27.41    2.03
  13   7   4   26.75    2.04
  13   7   3    3.24    0.94
  13   7   3    3.50    1.09
  13   7   2   -0.22    0.87
  13   7   2    0.19    0.73
  13   7   1    7.12    1.28
  13   7   1    8.62    1.27
  13   7   0    1.06    0.89
  13   7  -1    7.87    1.28
  13   7  -2    0.36    0.83
  13   7  -3   -0.08    0.85
  13   7  -4   26.24    1.97
  13   7  -5    1.04    0.89
  13   7  -6    4.26    1.13
 -13  -7   7    1.09    1.23
  13   7  -7    2.01    1.01
 -13  -7   8   -0.14    1.24
  13   7  -8    1.36    0.98
 -13  -7   9    0.77    1.46
  13   7  -9    2.06    1.04
 -13  -7  10   -1.41    1.40
  13   7 -10    0.35    0.96
 -13  -7  11    0.44    1.61
  13   7 -11    1.83    1.05
  12   7  10   -0.06    0.93
  12   7   9    8.17    1.47
  12   7   8    7.33    1.37
  12   7   7    0.45    0.80
  12   7   6    0.10    0.90
  12   7   6    0.61    0.75
  12   7   5    3.32    1.08
  12   7   5    2.78    0.92
  12   7   4    3.82    0.94
  12   7   4    2.48    1.02
  12   7   3    0.99    0.69
  12   7   3    0.12    0.84
  12   7   2    2.15    0.95
  12   7   2    1.52    0.77
  12   7   1   12.18    1.37
  12   7   1   12.22    1.46
  12   7   0    0.85    0.88
  12   7  -1    0.85    0.82
  12   7  -2   40.45    2.22
  12   7  -3    9.19    1.34
  12   7  -4    5.20    1.14
  12   7  -5    2.53    0.97
  12   7  -6   19.94    1.79
 -12  -7   7   -0.35    1.10
  12   7  -7   -0.08    0.80
 -12  -7   8   17.37    1.99
  12   7  -8   17.60    1.72
 -12  -7   9    2.13    1.43
  12   7  -9    2.91    1.07
 -12  -7  10    1.13    1.53
  12   7 -10   -0.05    0.89
 -12  -7  11   -3.31    1.34
  12   7 -11    0.47    0.95
 -12  -7  12   -1.29    1.51
  12   7 -12   -0.51    0.96
  11   7  11    4.46    1.30
  11   7  10    4.72    1.20
  11   7   9    3.89    1.12
  11   7   8    2.96    1.01
  11   7   7   16.02    1.70
  11   7   6   25.88    1.94
  11   7   6   25.65    2.02
  11   7   5   -0.42    0.81
  11   7   5    0.75    0.72
  11   7   4   48.38    2.35
  11   7   4   44.30    2.36
  11   7   3    0.51    0.66
  11   7   3    0.28    0.80
  11   7   2    1.06    0.69
  11   7   2    1.10    0.85
  11   7   1   16.21    1.58
  11   7   1   15.89    1.52
  11   7   0    0.86    0.67
  11   7   0    1.59    0.81
  11   7  -1    5.06    1.05
  11   7  -2    1.69    0.84
  11   7  -3    0.99    0.77
  11   7  -4   11.88    1.45
  11   7  -5    8.23    1.27
  11   7  -6    0.63    0.80
 -11  -7   7    0.10    1.08
  11   7  -7   -0.33    0.75
 -11  -7   8    0.49    1.16
  11   7  -8    0.42    0.85
 -11  -7   9    1.28    1.28
  11   7  -9    2.61    1.01
 -11  -7  10    4.56    1.59
  11   7 -10    5.48    1.27
 -11  -7  11    0.71    1.54
  11   7 -11    2.06    1.04
 -11  -7  12    5.47    1.79
  11   7 -12    6.12    1.36
 -11  -7  13   -1.32    1.53
  11   7 -13    1.01    1.09
  10   7  12   11.65    1.75
  10   7  11   -0.09    0.89
  10   7  10    0.50    0.88
  10   7   9    0.09    0.83
  10   7   8    3.60    1.01
  10   7   7    7.94    1.30
  10   7   7    6.01    1.08
  10   7   6    7.35    1.13
  10   7   6    8.91    1.30
  10   7   5    0.86    0.85
  10   7   5    0.33    0.66
  10   7   4   12.37    1.42
  10   7   4   11.81    1.27
  10   7   3    1.33    0.83
  10   7   3    1.03    0.67
  10   7   2   22.09    1.73
  10   7   2   23.53    1.66
  10   7   1    2.41    0.74
  10   7   1    2.69    0.87
  10   7   0    3.34    0.80
  10   7   0    4.62    1.00
  10   7  -1   19.39    1.61
  10   7  -2   19.43    1.61
  10   7  -3   12.45    1.34
  10   7  -4    0.69    0.74
  10   7  -5    2.94    0.92
  10   7  -6    6.82    1.14
 -10  -7   7    2.61    1.21
  10   7  -7    1.57    0.84
 -10  -7   8   30.76    2.54
  10   7  -8   26.75    1.86
 -10  -7   9   -0.60    1.17
  10   7  -9   -0.15    0.76
 -10  -7  10    1.79    1.38
  10   7 -10    0.63    0.86
 -10  -7  11   -0.68    1.35
  10   7 -11    0.48    0.89
 -10  -7  12    4.23    1.80
  10   7 -12    6.32    1.33
 -10  -7  13   -0.33    1.59
  10   7 -13   -0.62    0.94
   9   7  12   -0.51    0.86
   9   7  11    1.43    0.99
   9   7  10    2.28    1.00
   9   7   9   -0.14    0.74
   9   7   8    2.65    0.92
   9   7   8    3.18    1.06
   9   7   7    2.05    0.98
   9   7   7    1.11    0.78
   9   7   6   24.13    1.75
   9   7   6   22.94    1.89
   9   7   5   14.84    1.44
   9   7   5   14.25    1.45
   9   7   4   12.40    1.34
   9   7   4   13.96    1.40
   9   7   3    1.88    0.69
   9   7   3    2.94    0.87
   9   7   2    6.95    0.96
   9   7   2    8.72    1.15
   9   7   1    0.91    0.59
   9   7   1   -0.34    0.69
   9   7   0   53.04    2.27
   9   7   0   52.02    2.22
   9   7  -1    3.92    0.92
   9   7  -2    4.71    0.95
   9   7  -3    6.16    1.02
   9   7  -4    5.17    0.99
   9   7  -5    8.50    1.16
  -9  -7   6    9.53    1.39
   9   7  -6    9.54    1.22
  -9  -7   7    0.84    1.03
   9   7  -7    1.13    0.77
  -9  -7   8    7.26    1.46
   9   7  -8    6.87    1.13
  -9  -7   9    0.42    1.21
   9   7  -9    0.88    0.79
  -9  -7  10   18.07    2.10
   9   7 -10   23.18    1.76
  -9  -7  11   -0.45    1.30
   9   7 -11    0.86    0.86
  -9  -7  12    7.71    1.87
   9   7 -12   12.77    1.58
  -9  -7  13    2.21    1.58
  -9  -7  14   -2.39    1.43
   8   7  13    1.56    1.05
   8   7  12   12.93    1.73
   8   7  11    3.82    1.13
   8   7  10   10.84    1.48
   8   7   9    0.99    0.79
   8   7   8    1.41    0.97
   8   7   8    1.48    0.79
   8   7   7   23.42    1.78
   8   7   7   24.02    1.84
   8   7   6   11.02    1.23
   8   7   6   11.57    1.31
   8   7   5    0.05    0.73
   8   7   5    0.16    0.53
   8   7   4   30.11    1.75
   8   7   4   29.85    1.77
   8   7   3   23.08    1.62
   8   7   3   23.23    1.56
   8   7   2    8.28    1.01
   8   7   2    9.45    1.14
   8   7   1    0.30    0.52
   8   7   1   -0.34    0.66
   8   7   0    1.95    0.75
   8   7   0    1.07    0.58
   8   7  -1    4.82    0.89
   8   7  -2   14.21    1.37
   8   7  -3    2.17    0.80
   8   7  -4   13.58    1.37
  -8  -7   5   14.45    1.14
   8   7  -5   14.75    1.41
  -8  -7   6    5.00    1.22
   8   7  -6    5.32    1.01
  -8  -7   7    5.02    1.22
   8   7  -7    5.00    0.97
  -8  -7   8    1.02    1.07
   8   7  -8   -0.11    0.66
  -8  -7   9    2.55    1.27
   8   7  -9    3.35    0.94
  -8  -7  10   10.87    1.68
   8   7 -10    9.82    1.29
  -8  -7  11   -1.56    1.23
   8   7 -11    0.99    0.82
  -8  -7  12   20.97    2.29
   8   7 -12   26.68    1.92
  -8  -7  13   -0.78    1.36
  -8  -7  14    1.02    1.58
   7   7  13   -1.36    0.85
   7   7  12    0.69    1.01
   7   7  11    2.96    1.06
   7   7  10   21.38    1.92
   7   7   9    1.92    0.86
   7   7   9    0.97    0.97
   7   7   8   11.19    1.33
   7   7   8   11.71    1.41
   7   7   7    0.69    0.66
   7   7   7    0.68    0.86
   7   7   6    8.60    1.08
   7   7   6    7.91    1.16
   7   7   5    3.91    0.99
   7   7   5    2.52    0.72
   7   7   4    6.65    1.03
   7   7   4    7.60    0.93
   7   7   3    5.68    0.82
   7   7   3    5.30    0.93
   7   7   2    7.39    1.01
   7   7   2    8.22    0.93
   7   7   1    0.67    0.65
   7   7   1    0.22    0.47
   7   7   0   35.27    1.73
   7   7   0   33.76    1.66
   7   7  -1   29.18    1.60
   7   7  -2    7.61    0.99
   7   7  -3   13.82    1.28
   7   7  -4    7.56    1.02
  -7  -7   5    4.22    0.57
   7   7  -5    3.53    0.84
  -7  -7   6   36.48    2.41
   7   7  -6   33.36    1.84
  -7  -7   7   14.70    1.64
   7   7  -7   14.34    1.36
  -7  -7   8    4.16    1.22
   7   7  -8    2.91    0.82
  -7  -7   9    0.10    1.08
   7   7  -9    0.93    0.70
  -7  -7  10    8.27    1.54
   7   7 -10    9.23    1.21
  -7  -7  11    3.26    1.40
   7   7 -11    3.72    0.99
  -7  -7  12   -0.55    1.21
   7   7 -12    2.04    0.91
  -7  -7  13    0.23    1.38
  -7  -7  14    1.89    1.58
   6   7  14   -0.20    0.98
   6   7  13    0.48    0.98
   6   7  12   25.11    2.22
   6   7  11    1.51    0.95
   6   7  10    0.38    0.79
   6   7   9    3.20    0.93
   6   7   8   14.86    1.53
   6   7   8   16.46    1.55
   6   7   7    0.95    0.60
   6   7   7    0.17    0.86
   6   7   6   14.53    1.41
   6   7   6   13.23    1.33
   6   7   5    8.36    0.97
   6   7   5   10.47    1.20
   6   7   4    0.68    0.73
   6   7   4   -0.26    0.43
   6   7   3   36.55    1.83
   6   7   3   34.83    1.61
   6   7   2    3.90    0.81
   6   7   2    2.88    0.59
   6   7   1   55.39    2.07
   6   7   1   53.57    1.91
   6   7   0    1.32    0.49
   6   7   0    1.35    0.61
   6   7  -1    1.33    0.62
   6   7  -2  175.76    4.17
   6   7  -3    2.78    0.71
  -6  -7   4   37.48    1.43
   6   7  -4   37.63    1.76
  -6  -7   5    0.43    0.43
  -6  -7   5   -0.17    0.89
   6   7  -5    0.06    0.58
  -6  -7   6    0.00    0.96
  -6  -7   6    1.33    0.39
   6   7  -6    0.69    0.69
  -6  -7   7   51.53    2.76
   6   7  -7   50.20    2.09
  -6  -7   8    3.03    1.13
   6   7  -8    1.74    0.71
  -6  -7   9    2.90    1.16
   6   7  -9    2.00    0.75
  -6  -7  10    8.46    1.51
   6   7 -10    8.12    1.11
  -6  -7  11   -0.16    1.14
   6   7 -11    0.69    0.75
  -6  -7  12    7.44    1.60
  -6  -7  13   -0.47    1.29
  -6  -7  14    0.77    1.41
  -6  -7  15   -0.77    1.34
   5   7  14    1.13    1.07
   5   7  13    0.76    0.97
   5   7  12    3.18    1.11
   5   7  11   -0.45    0.75
   5   7  10    3.38    1.21
   5   7  10    3.03    0.94
   5   7   9    0.43    0.97
   5   7   9   -0.29    0.63
   5   7   8    0.98    0.95
   5   7   8    1.28    0.70
   5   7   7    0.73    0.89
   5   7   7    0.33    0.59
   5   7   6   15.82    1.36
   5   7   6   15.30    1.45
   5   7   5   16.42    1.25
   5   7   5   18.55    1.64
   5   7   4   40.55    1.72
   5   7   4   44.76    2.01
   5   7   3    0.47    0.63
   5   7   3    0.18    0.38
   5   7   2   17.86    1.27
   5   7   2   15.67    1.10
   5   7   1   28.72    1.32
   5   7   1   31.22    1.52
   5   7   0   50.74    1.74
   5   7   0   51.75    1.86
   5   7  -1   33.57    1.51
   5   7  -2    6.83    0.84
   5   7  -3    7.32    0.87
  -5  -7   4   48.62    1.52
  -5  -7   4   50.46    2.23
   5   7  -4   49.17    1.87
  -5  -7   5    1.88    0.44
  -5  -7   5    1.98    0.89
   5   7  -5    2.35    0.68
  -5  -7   6   82.43    1.92
  -5  -7   6   89.76    3.18
   5   7  -6   80.68    2.57
  -5  -7   7   20.51    0.93
  -5  -7   7   23.90    2.21
   5   7  -7   19.20    1.36
  -5  -7   8    0.63    1.05
   5   7  -8    1.64    0.67
  -5  -7   9    0.02    1.03
   5   7  -9    0.84    0.66
  -5  -7  10   10.89    1.57
   5   7 -10   13.18    1.33
  -5  -7  11    0.64    1.14
   5   7 -11    0.15    0.73
  -5  -7  12   -1.13    1.06
  -5  -7  13    0.47    1.25
  -5  -7  14    4.16    1.51
  -5  -7  15   -1.00    1.26
   4   7  14   -0.04    0.93
   4   7  13    8.35    1.41
   4   7  12   21.10    1.98
   4   7  11    1.24    0.82
   4   7  10    4.29    0.97
   4   7  10    3.13    1.19
   4   7   9    0.61    1.00
   4   7   9   -0.26    0.61
   4   7   8   15.33    1.53
   4   7   8   13.79    1.36
   4   7   7    1.13    0.96
   4   7   7   -0.85    0.48
   4   7   6    6.76    0.87
   4   7   6    7.71    1.17
   4   7   5    0.81    0.48
   4   7   5    1.15    0.83
   4   7   4    0.35    0.39
   4   7   4    0.49    0.69
   4   7   3    3.99    0.80
   4   7   3    4.04    0.55
   4   7   2   55.39    1.72
   4   7   2   56.00    1.96
   4   7   1   47.30    1.76
   4   7   1   47.43    1.57
   4   7   0   13.29    1.06
   4   7  -1   18.10    1.14
   4   7  -2   10.64    1.02
  -4  -7   3   87.58    2.11
   4   7  -3   89.92    2.46
  -4  -7   4   14.26    0.91
  -4  -7   4   11.76    1.10
   4   7  -4   12.57    1.08
  -4  -7   5   11.60    1.18
  -4  -7   5   11.67    0.87
   4   7  -5   13.03    1.11
  -4  -7   6   29.28    2.10
  -4  -7   6   27.49    1.09
   4   7  -6   28.48    1.45
  -4  -7   7    0.01    0.33
  -4  -7   7    1.50    0.97
   4   7  -7    0.17    0.56
  -4  -7   8   15.28    1.62
   4   7  -8   16.57    1.26
  -4  -7   9    1.60    1.06
   4   7  -9    2.16    0.70
  -4  -7  10    0.92    1.04
   4   7 -10   -0.15    0.62
  -4  -7  11    0.58    1.05
  -4  -7  12    0.02    1.05
  -4  -7  13    3.35    1.36
  -4  -7  14    1.21    1.28
  -4  -7  15    1.58    1.36
   3   7  15   -1.15    0.93
   3   7  14   -0.23    0.97
   3   7  13    0.93    0.96
   3   7  12    3.25    1.05
   3   7  11   -1.15    1.06
   3   7  11    1.55    0.87
   3   7  10    1.02    0.75
   3   7  10    1.76    1.11
   3   7   9   19.08    1.67
   3   7   9   20.21    1.63
   3   7   8    0.76    0.65
   3   7   8    2.37    1.05
   3   7   7    0.21    0.97
   3   7   7    1.75    0.63
   3   7   6   58.74    2.05
   3   7   6   60.72    2.45
   3   7   5    4.87    0.67
   3   7   5    6.49    1.00
   3   7   4  143.81    3.25
   3   7   4  139.58    3.54
   3   7   3   20.72    1.39
   3   7   3   20.64    1.02
   3   7   2    0.06    0.54
   3   7   2    0.44    0.30
   3   7   1   32.55    1.20
   3   7   1   33.51    1.47
   3   7   0   58.09    1.83
   3   7  -1    6.06    0.70
  -3  -7   2   19.40    1.08
   3   7  -2   17.27    1.05
  -3  -7   3   17.40    1.38
  -3  -7   3   15.87    0.95
   3   7  -3   17.36    1.09
  -3  -7   4   49.90    2.00
  -3  -7   4   50.43    1.46
   3   7  -4   51.74    1.71
  -3  -7   5   36.74    1.26
  -3  -7   5   37.15    1.96
   3   7  -5   37.89    1.51
  -3  -7   6   31.91    1.18
  -3  -7   6   34.77    2.08
   3   7  -6   32.68    1.46
  -3  -7   7    2.97    0.45
  -3  -7   7    4.14    1.06
   3   7  -7    3.34    0.67
  -3  -7   8    0.22    0.36
  -3  -7   8    0.33    0.95
   3   7  -8   -0.12    0.55
  -3  -7   9   -0.20    0.91
   3   7  -9    0.14    0.57
  -3  -7  10   48.75    2.67
   3   7 -10   52.25    1.97
  -3  -7  11    1.78    1.11
  -3  -7  12    0.41    1.05
  -3  -7  13    0.79    1.13
  -3  -7  14    1.02    1.21
  -3  -7  15    1.64    1.37
   2   7  15   -0.34    0.99
   2   7  14    2.56    1.13
   2   7  13    0.87    0.92
   2   7  12   14.42    1.56
   2   7  12   10.98    1.65
   2   7  11   -0.18    1.14
   2   7  11    1.45    0.82
   2   7  10    0.99    0.75
   2   7  10    0.12    1.05
   2   7   9   10.03    1.14
   2   7   9   11.94    1.45
   2   7   8   -0.11    0.57
   2   7   8    1.12    1.04
   2   7   7   39.97    2.24
   2   7   7   39.40    1.80
   2   7   6    4.28    0.68
   2   7   6    2.36    0.95
   2   7   5   19.08    1.55
   2   7   5   18.86    1.09
   2   7   4   60.09    2.11
   2   7   4   56.38    1.68
   2   7   3  111.76    2.52
   2   7   3  114.30    2.95
   2   7   2  105.30    2.33
   2   7   2  105.98    2.73
   2   7   1   50.33    1.74
   2   7   1   51.10    1.38
   2   7   0   18.62    1.09
  -2  -7   1  148.23    3.05
   2   7  -1  149.58    3.29
  -2  -7   2   -0.02    0.41
  -2  -7   2    0.19    0.34
   2   7  -2   -0.13    0.38
  -2  -7   3   93.53    2.49
  -2  -7   3   89.48    2.12
   2   7  -3   93.73    2.31
  -2  -7   4   30.65    1.14
  -2  -7   4   29.24    1.60
   2   7  -4   28.31    1.23
  -2  -7   5    1.69    0.38
  -2  -7   5    1.28    0.71
   2   7  -5    1.43    0.47
  -2  -7   6   38.50    2.06
  -2  -7   6   35.37    1.27
   2   7  -6   35.27    1.38
  -2  -7   7    0.46    0.37
  -2  -7   7    0.45    0.84
   2   7  -7    0.78    0.49
  -2  -7   8    2.59    0.48
  -2  -7   8    3.46    1.05
   2   7  -8    2.65    0.62
  -2  -7   9    6.92    0.66
  -2  -7   9    6.70    1.21
   2   7  -9    6.97    0.81
  -2  -7  10    1.10    0.95
  -2  -7  11    3.82    1.18
  -2  -7  12    0.76    1.06
  -2  -7  13   -0.07    1.00
  -2  -7  14   -0.74    1.09
  -2  -7  15   -1.97    1.13
   1   7  15   -0.23    1.02
   1   7  14   -0.25    0.96
   1   7  13    2.85    1.06
   1   7  12   12.00    1.69
   1   7  12   12.50    1.43
   1   7  11    0.97    0.80
   1   7  11   -0.18    1.14
   1   7  10   59.36    2.80
   1   7  10   61.72    2.53
   1   7   9    8.28    1.35
   1   7   9   10.32    1.15
   1   7   8   12.74    1.48
   1   7   8   14.21    1.34
   1   7   7   21.50    1.42
   1   7   7   22.64    1.98
   1   7   6   41.51    1.58
   1   7   6   40.62    2.14
   1   7   5   34.35    1.33
   1   7   5   33.40    1.86
   1   7   4    3.98    0.45
   1   7   4    4.73    0.86
   1   7   3   10.41    0.99
   1   7   3   11.00    0.67
   1   7   2    0.39    0.21
   1   7   2    0.87    0.58
   1   7   1    0.50    0.22
   1   7   1    0.79    0.51
  -1  -7   0  174.38    3.43
   1   7   0  169.84    3.66
  -1  -7   1   18.88    0.95
  -1  -7   1   20.21    1.02
   1   7  -1   20.89    1.09
  -1  -7   2   67.79    1.85
  -1  -7   2   66.18    1.71
   1   7  -2   65.11    1.78
  -1  -7   3    0.97    0.36
  -1  -7   3    0.87    0.50
   1   7  -3    1.65    0.42
  -1  -7   4   10.63    0.84
  -1  -7   4   11.08    0.98
   1   7  -4   12.02    0.82
  -1  -7   5   55.22    1.59
  -1  -7   5   57.95    2.13
   1   7  -5   55.43    1.60
  -1  -7   6    5.22    0.56
  -1  -7   6    5.03    0.90
   1   7  -6    5.80    0.60
  -1  -7   7    6.30    0.62
  -1  -7   7    6.20    1.04
   1   7  -7    6.57    0.67
  -1  -7   8    2.17    0.50
  -1  -7   8    2.72    0.96
   1   7  -8    2.26    0.56
  -1  -7   9   10.09    1.30
  -1  -7   9   12.48    1.03
  -1  -7  10  116.99    3.81
  -1  -7  10  121.35    2.89
  -1  -7  11   15.14    1.61
  -1  -7  12    2.19    1.08
  -1  -7  13    0.13    1.00
  -1  -7  14    0.37    1.13
  -1  -7  15    1.97    1.30
   0   7  15   -0.53    1.00
   0   7  14    0.88    0.99
   0   7  13    0.13    0.89
   0   7  13   -0.92    1.26
   0   7  12   13.83    1.47
   0   7  12   13.68    1.75
   0   7  11    1.71    1.23
   0   7  11    1.70    0.85
   0   7  10    0.93    1.12
   0   7  10   -0.04    0.70
   0   7   9   21.70    1.92
   0   7   9   23.37    1.59
   0   7   8    6.28    1.28
   0   7   8    4.85    0.83
   0   7   7    6.77    0.82
   0   7   7    8.32    1.27
   0   7   6    6.38    0.69
   0   7   6    6.15    1.09
   0   7   5   48.64    1.51
   0   7   5   45.82    2.05
   0   7   4   63.83    1.62
   0   7   4   64.71    2.19
   0   7   3   53.40    1.30
   0   7   3   53.41    1.86
   0   7   2  140.86    3.27
   0   7   2  142.83    2.62
   0  -7  -1    3.26    0.49
   0   7   1    3.03    0.63
   0  -7   0   -0.20    0.25
   0  -7   0   -0.12    0.32
   0   7   0   -0.06    0.47
   0  -7   1    2.26    0.39
   0  -7   1    2.79    0.43
   0   7  -1    2.91    0.52
   0  -7   2  151.86    3.13
   0  -7   2  145.78    3.00
   0   7  -2  146.34    3.09
   0  -7   3   53.35    1.74
   0  -7   3   58.80    1.60
   0   7  -3   54.89    1.50
   0  -7   4   65.63    1.78
   0  -7   4   66.17    2.08
   0   7  -4   66.28    1.66
   0  -7   5   47.61    1.52
   0  -7   5   50.17    1.95
   0   7  -5   45.99    1.34
   0  -7   6    4.85    0.87
   0  -7   6    4.98    0.59
   0   7  -6    6.59    0.64
   0  -7   7    5.66    0.63
   0  -7   7    6.46    1.01
   0   7  -7    6.78    0.59
   0  -7   8    4.48    0.62
   0  -7   8    5.83    1.04
   0  -7   9   18.45    1.19
   0  -7   9   21.27    1.83
   0  -7  10    1.04    0.88
   0  -7  10    0.01    0.46
   0  -7  11    0.61    0.56
   0  -7  11    0.51    0.88
   0  -7  12   12.59    1.55
   0  -7  13   -1.12    0.90
   0  -7  14    2.71    1.20
   0  -7  15   -0.46    1.11
  -1   7  15    4.51    1.32
  -1   7  14    0.62    1.01
  -1   7  13   -0.34    1.26
  -1   7  13    0.07    0.90
  -1   7  12    2.43    0.95
  -1   7  12    2.71    1.33
  -1   7  11   20.62    2.11
  -1   7  11   18.91    1.67
  -1   7  10  124.07    3.91
  -1   7  10  126.49    3.60
  -1   7   9   11.41    1.13
  -1   7   9   10.97    1.48
  -1   7   8    3.39    1.19
  -1   7   8    2.62    0.72
  -1   7   7    6.68    1.21
  -1   7   7    6.84    0.80
  -1   7   6    5.50    1.05
  -1   7   6    5.82    0.66
  -1   7   5   55.42    1.57
  -1   7   5   53.58    2.11
  -1   7   4   12.32    0.70
  -1   7   4   10.52    1.05
  -1   7   3    0.85    0.64
  -1   7   3    0.90    0.21
   1  -7  -2   67.19    1.81
  -1   7   2   66.71    2.02
   1  -7  -1   19.26    0.98
  -1   7   1   22.20    1.27
   1  -7   0  170.83    3.35
   1  -7   0  173.20    3.04
  -1   7   0  167.55    3.58
   1  -7   1    0.33    0.29
   1  -7   1    0.38    0.32
  -1   7  -1    0.97    0.46
   1  -7   2    0.61    0.35
   1  -7   2    0.06    0.30
  -1   7  -2    0.63    0.40
   1  -7   3   11.10    0.84
   1  -7   3   10.07    0.96
  -1   7  -3   10.77    0.73
   1  -7   4    4.54    0.53
   1  -7   4    4.42    0.65
  -1   7  -4    4.97    0.45
   1  -7   5   33.77    1.63
   1  -7   5   31.26    1.28
  -1   7  -5   31.87    0.97
   1  -7   6   36.71    1.83
   1  -7   6   40.86    1.52
   1  -7   7   19.92    1.63
   1  -7   7   19.98    1.22
   1  -7   8   12.68    1.11
   1  -7   8    9.70    1.19
   1  -7   9    8.22    0.82
   1  -7   9    7.71    1.15
   1  -7  10   57.61    2.03
   1  -7  10   56.34    2.59
   1  -7  11    0.21    0.56
   1  -7  11    1.42    0.92
   1  -7  12   11.06    1.47
   1  -7  13    2.78    1.13
   1  -7  14   -0.02    1.09
   1  -7  15    0.07    1.07
  -2   7  14    0.95    1.47
  -2   7  14   -1.44    0.88
  -2   7  13   -0.28    0.88
  -2   7  13   -1.01    1.27
  -2   7  12    2.27    0.94
  -2   7  12    3.06    1.38
  -2   7  11    5.09    1.40
  -2   7  11    3.78    0.99
  -2   7  10   -0.40    0.73
  -2   7  10    1.31    1.12
  -2   7   9    6.44    0.92
  -2   7   9    6.69    1.33
  -2   7   8    3.05    0.75
  -2   7   8    2.71    1.17
  -2   7   7    0.63    0.54
  -2   7   7    0.52    0.99
  -2   7   6   34.64    1.42
  -2   7   6   35.71    1.99
  -2   7   5    0.53    0.78
  -2   7   5    1.35    0.40
   2  -7  -4   27.73    1.29
  -2   7   4   28.43    0.96
  -2   7   4   26.28    1.57
   2  -7  -3   85.00    2.11
  -2   7   3   89.93    2.52
   2  -7  -2    0.10    0.33
  -2   7   2    0.37    0.58
   2  -7  -1  139.23    2.88
  -2   7   1  144.08    3.19
   2  -7   0   17.59    0.54
   2  -7   0   16.82    0.92
  -2   7   0   19.04    1.06
   2  -7   1   46.58    1.42
   2  -7   1   46.74    1.20
  -2   7  -1   47.67    1.49
   2  -7   2  109.27    2.43
   2  -7   2  104.87    2.32
  -2   7  -2  103.29    2.33
   2  -7   3  116.62    2.61
   2  -7   3  110.90    2.62
  -2   7  -3  112.47    2.36
   2  -7   4   56.65    1.72
   2  -7   4   58.94    1.87
  -2   7  -4   55.87    1.31
   2  -7   5   18.23    1.29
   2  -7   5   18.28    1.10
   2  -7   6    3.37    0.57
   2  -7   6    2.26    0.71
   2  -7   7   36.26    1.91
   2  -7   7   33.88    1.52
   2  -7   8   -0.05    0.46
   2  -7   8    1.21    0.75
   2  -7   9   13.46    1.25
   2  -7   9    8.01    1.13
   2  -7  10    0.20    0.75
   2  -7  10    0.03    0.53
   2  -7  11    1.14    0.87
   2  -7  11   -0.18    0.59
   2  -7  12   10.62    1.48
   2  -7  13    2.42    1.14
   2  -7  14    1.98    1.13
   2  -7  15   -2.38    0.87
  -3   7  14    2.19    1.13
  -3   7  14    2.34    1.53
  -3   7  13   -0.73    0.87
  -3   7  13   -1.03    1.26
  -3   7  12    1.41    0.92
  -3   7  12    1.47    1.27
  -3   7  11    1.41    0.87
  -3   7  11    3.06    1.27
  -3   7  10   49.78    2.57
  -3   7  10   48.46    2.18
  -3   7   9    0.73    1.09
  -3   7   9    0.08    0.68
  -3   7   8    1.32    1.19
  -3   7   8    1.26    0.67
  -3   7   7    4.77    1.17
  -3   7   7    2.91    0.69
   3  -7  -6   33.84    1.50
  -3   7   6   32.06    1.43
   3  -7  -5   34.78    1.43
  -3   7   5   37.51    1.86
  -3   7   5   36.91    1.32
   3  -7  -4   49.71    1.55
  -3   7   4   48.20    1.35
   3  -7  -3   16.07    0.95
   3  -7  -2   19.68    1.00
  -3   7   2   18.33    1.27
   3  -7  -1    4.77    0.51
  -3   7   1    5.44    0.76
   3  -7   0   58.02    1.61
   3  -7   0   56.70    1.27
  -3   7   0   59.28    1.74
   3  -7   1   30.77    1.18
   3  -7   1   32.32    0.99
  -3   7  -1   32.41    1.26
   3  -7   2    0.67    0.29
   3  -7   2    0.02    0.33
  -3   7  -2    0.05    0.44
   3  -7   3   17.93    1.03
   3  -7   3   18.19    1.03
  -3   7  -3   18.51    0.88
   3  -7   4  140.08    3.13
   3  -7   4  138.06    3.25
   3  -7   5    6.33    0.82
   3  -7   5    5.65    0.67
   3  -7   6   58.91    1.96
   3  -7   6   57.21    2.20
   3  -7   7    0.82    0.51
   3  -7   7    0.32    0.65
   3  -7   8    1.36    0.57
   3  -7   8    0.77    0.74
   3  -7   9   18.83    1.41
   3  -7   9   17.86    1.66
   3  -7  10    1.65    0.87
   3  -7  10    1.84    0.66
   3  -7  11    0.95    0.69
   3  -7  11    0.31    0.83
   3  -7  12    3.51    1.13
   3  -7  13    0.83    1.00
   3  -7  14    1.67    1.08
   3  -7  15    0.71    1.11
  -4   7  14    0.92    1.45
  -4   7  13    3.63    1.47
  -4   7  13    1.62    1.02
  -4   7  12    0.91    1.19
  -4   7  12    0.46    0.88
  -4   7  11   -0.37    0.81
  -4   7  11    1.39    1.25
  -4   7  10   -0.85    0.69
  -4   7  10    0.82    1.15
  -4   7   9    0.80    0.75
  -4   7   9    1.20    1.06
   4  -7  -8   16.27    1.30
  -4   7   8   17.09    1.53
  -4   7   8   14.41    1.55
   4  -7  -7   -0.44    0.47
  -4   7   7   -0.07    0.99
  -4   7   7    0.95    0.66
   4  -7  -6   27.64    1.31
  -4   7   6   28.97    1.48
   4  -7  -5   11.91    0.98
  -4   7   5   11.35    1.18
  -4   7   5   11.32    1.08
   4  -7  -4   13.71    0.92
  -4   7   4   11.27    0.92
  -4   7   4   11.86    1.09
   4  -7  -3   88.80    2.09
  -4   7   3   81.40    1.86
  -4   7   3   90.00    2.48
   4  -7  -2    5.06    0.52
  -4   7   2    6.42    0.80
   4  -7  -1   17.66    0.97
   4  -7  -1   17.20    0.64
   4  -7   0   12.66    0.86
   4  -7   1   45.05    1.27
   4  -7   1   45.87    1.48
  -4   7  -1   40.68    1.47
   4  -7   2   55.14    1.57
   4  -7   2   52.94    1.66
  -4   7  -2   52.21    1.53
   4  -7   3    4.53    0.57
   4  -7   3    4.56    0.60
  -4   7  -3    5.01    0.54
   4  -7   4   -0.06    0.40
   4  -7   4    0.51    0.44
   4  -7   5    0.80    0.48
   4  -7   5    1.60    0.59
   4  -7   6    5.58    0.75
   4  -7   6    6.57    0.89
   4  -7   7   -0.49    0.60
   4  -7   7    0.20    0.51
   4  -7   8   11.71    1.24
   4  -7   8   13.17    1.24
   4  -7   9    0.50    0.72
   4  -7   9    0.20    0.55
   4  -7  10    4.25    1.00
   4  -7  10    2.90    0.76
   4  -7  11    2.19    0.98
   4  -7  12   13.00    1.59
   4  -7  13    8.44    1.48
   4  -7  14   -0.10    1.00
  -5   7  15    0.35    1.54
  -5   7  14    5.19    1.73
  -5   7  13    1.85    1.42
  -5   7  12   -1.31    0.81
  -5   7  12    0.27    1.29
  -5   7  11   -0.97    1.06
  -5   7  11   -0.94    0.79
  -5   7  10   13.18    1.61
  -5   7  10   11.23    1.24
  -5   7   9    0.77    1.04
  -5   7   9    0.93    0.78
   5  -7  -8    0.54    0.45
  -5   7   8    1.74    1.07
  -5   7   8    1.42    0.78
   5  -7  -7   19.84    1.17
  -5   7   7   22.24    1.88
  -5   7   7   19.33    1.55
   5  -7  -6   79.06    2.05
  -5   7   6   82.82    2.40
  -5   7   6   85.86    2.83
   5  -7  -5    2.12    0.47
  -5   7   5    1.72    0.62
  -5   7   5    3.17    0.95
   5  -7  -4   47.07    1.48
  -5   7   4   49.28    1.57
  -5   7   4   44.30    1.92
   5  -7  -3    6.50    0.60
  -5   7   3    6.31    0.89
   5  -7  -2    5.08    0.54
  -5   7   2    5.28    0.82
   5  -7  -1   30.44    1.00
   5  -7  -1   33.20    1.26
  -5   7   1   31.91    1.44
   5  -7   0   50.98    1.40
   5  -7   0   48.89    1.58
  -5   7   0   51.00    1.66
   5  -7   1   30.07    1.11
   5  -7   1   29.42    1.25
  -5   7  -1   28.49    1.24
   5  -7   2   15.56    0.96
   5  -7   2   14.83    1.01
   5  -7   3    0.15    0.41
   5  -7   3    0.19    0.39
  -5   7  -3    0.05    0.44
   5  -7   4   43.30    1.71
   5  -7   4   41.38    1.68
   5  -7   5   16.78    1.32
   5  -7   5   16.17    1.21
   5  -7   6   14.79    1.22
   5  -7   6   14.94    1.40
   5  -7   7   -0.69    0.46
   5  -7   7   -0.21    0.60
   5  -7   8    0.98    0.60
   5  -7   8    0.82    0.70
   5  -7   9    0.51    0.74
   5  -7   9    0.48    0.60
   5  -7  10    4.01    1.03
   5  -7  10    4.23    0.87
   5  -7  11   -0.60    0.75
   5  -7  12    2.85    1.10
   5  -7  13   -0.22    0.91
   5  -7  14   -0.90    0.94
  -6   7  15   -0.30    1.54
  -6   7  14   -0.96    1.38
  -6   7  13   -0.11    1.39
  -6   7  12    8.65    1.57
  -6   7  11   -2.08    0.81
  -6   7  11    0.41    1.16
  -6   7  10   11.34    1.53
  -6   7  10    7.23    1.14
  -6   7   9    1.21    0.83
  -6   7   9    2.11    1.11
  -6   7   8    3.53    1.10
  -6   7   8    0.24    0.77
   6  -7  -7   51.44    1.54
  -6   7   7   50.27    2.18
  -6   7   7   47.84    2.39
   6  -7  -6    1.94    0.44
  -6   7   6    1.90    1.00
  -6   7   6    1.76    0.78
   6  -7  -5    1.00    0.40
  -6   7   5    1.43    0.67
  -6   7   5    0.48    0.88
   6  -7  -4   37.50    1.33
  -6   7   4   36.69    1.83
  -6   7   4   36.95    1.51
   6  -7  -3    2.06    0.45
  -6   7   3    1.71    0.80
   6  -7  -2  172.96    3.57
  -6   7   2  181.57    4.04
   6  -7  -1    1.12    0.42
   6  -7  -1    0.97    0.33
  -6   7   1    0.66    0.59
   6  -7   0    0.91    0.33
   6  -7   0    1.02    0.42
  -6   7   0    0.53    0.57
   6  -7   1   51.38    1.73
   6  -7   1   51.21    1.61
  -6   7  -1   50.45    1.63
   6  -7   2    3.82    0.58
   6  -7   2    2.89    0.56
  -6   7  -2    2.59    0.58
   6  -7   3   34.80    1.58
   6  -7   3   34.53    1.48
   6  -7   4    0.15    0.47
   6  -7   4    0.72    0.50
   6  -7   5    8.54    0.98
   6  -7   5    8.57    0.92
   6  -7   6   10.56    1.02
   6  -7   6   14.35    1.42
   6  -7   7   -0.22    0.59
   6  -7   7    0.74    0.57
   6  -7   8   14.66    1.32
   6  -7   8   15.91    1.56
   6  -7   9    2.59    0.89
   6  -7   9    1.61    0.72
   6  -7  10    1.24    0.87
   6  -7  10    0.65    0.72
   6  -7  11    2.54    1.01
   6  -7  12   20.20    2.06
   6  -7  13    1.72    1.09
   6  -7  14   -0.58    0.92
  -7   7  14    3.99    1.68
  -7   7  13    0.59    1.34
  -7   7  12    1.02    1.26
  -7   7  11    3.42    1.28
  -7   7  10    7.25    1.22
  -7   7  10   10.84    1.53
  -7   7   9    0.84    1.04
  -7   7   9   -0.27    0.85
  -7   7   8    2.39    0.90
  -7   7   8    3.26    1.08
  -7   7   7   14.82    1.26
  -7   7   7   18.07    1.79
   7  -7  -6   34.39    1.30
  -7   7   6   33.23    2.01
  -7   7   6   31.63    1.90
   7  -7  -5    3.78    0.54
  -7   7   5    4.76    1.08
  -7   7   5    3.19    0.80
   7  -7  -4    5.79    0.61
  -7   7   4    4.81    1.01
   7  -7  -3   12.98    1.01
  -7   7   3   13.50    1.26
   7  -7  -2    6.20    0.65
  -7   7   2    6.89    0.98
   7  -7  -1   30.76    1.25
   7  -7  -1   31.61    1.39
  -7   7   1   28.46    1.56
   7  -7   0   33.56    1.32
   7  -7   0   34.05    1.44
  -7   7   0   30.84    1.49
   7  -7   1    0.67    0.46
   7  -7   1    0.12    0.36
  -7   7  -1    0.23    0.59
   7  -7   2    8.04    0.81
   7  -7   2    6.41    0.78
  -7   7  -2    8.52    0.79
   7  -7   3    5.16    0.75
   7  -7   3    4.08    0.70
  -7   7  -3    5.49    0.66
   7  -7   4    6.72    0.86
   7  -7   4    6.47    0.82
   7  -7   5    2.36    0.67
   7  -7   5    3.39    0.75
   7  -7   6    7.19    1.01
   7  -7   6    8.91    0.99
   7  -7   7    0.40    0.65
   7  -7   7    0.58    0.61
   7  -7   8    9.66    1.09
   7  -7   8    9.51    1.28
   7  -7   9    1.32    0.75
   7  -7   9    1.58    0.84
   7  -7  10   21.41    1.92
   7  -7  11    4.36    1.16
   7  -7  12    1.08    0.99
   7  -7  13    0.70    0.98
  -8   7  14    2.20    1.55
  -8   7  13    2.50    1.44
  -8   7  11    1.79    1.21
  -8   7  10    9.89    1.51
  -8   7   9    2.29    0.99
  -8   7   9    4.10    1.21
  -8   7   8    0.96    0.98
  -8   7   8    0.10    0.86
  -8   7   7    7.55    1.23
  -8   7   7    4.21    0.97
  -8   7   6    8.14    1.27
  -8   7   6    6.29    0.98
   8  -7  -5   16.41    1.06
  -8   7   5   15.29    1.51
  -8   7   5   13.62    1.44
   8  -7  -4   14.11    1.02
  -8   7   4   12.78    1.33
   8  -7  -3    2.52    0.52
  -8   7   3    0.84    0.86
   8  -7  -2   15.95    1.13
  -8   7   2   13.60    1.22
   8  -7  -1    4.06    0.64
   8  -7  -1    4.20    0.59
  -8   7   1    4.70    0.87
   8  -7   0    1.07    0.50
   8  -7   0    2.30    0.51
  -8   7   0    1.48    0.72
   8  -7   1    0.46    0.44
   8  -7   1    0.32    0.49
  -8   7  -1   -0.58    0.61
   8  -7   2    8.69    0.89
   8  -7   2    7.30    0.85
  -8   7  -2    8.51    0.86
   8  -7   3   21.05    1.40
   8  -7   3   22.73    1.48
  -8   7  -3   23.29    1.23
   8  -7   4   27.88    1.63
   8  -7   4   28.40    1.59
   8  -7   5    0.43    0.55
   8  -7   5   -0.15    0.52
   8  -7   6   10.10    1.08
   8  -7   6    9.78    1.15
   8  -7   7   21.33    1.60
   8  -7   7   23.22    1.72
   8  -7   8    0.19    0.71
   8  -7   8    0.73    0.71
   8  -7   9    0.23    0.76
   8  -7   9    1.38    0.80
   8  -7  10   10.12    1.45
   8  -7  11    1.12    1.01
   8  -7  12   11.76    1.69
   8  -7  13    0.28    1.00
  -9   7  14    3.25    1.54
  -9   7  13    4.91    1.55
  -9   7  12   13.08    1.79
  -9   7  11    1.70    1.21
  -9   7  10   17.23    1.82
  -9   7   9    1.41    1.08
  -9   7   8    8.40    1.35
  -9   7   8    4.94    1.13
  -9   7   7    0.92    0.98
  -9   7   7    1.01    0.85
  -9   7   6    8.48    1.04
  -9   7   6    9.34    1.31
   9  -7  -5    7.51    0.70
  -9   7   5    7.19    1.20
  -9   7   5    7.09    0.97
   9  -7  -4    4.78    0.63
  -9   7   4    5.58    1.11
   9  -7  -3    6.29    0.72
  -9   7   3    6.89    1.13
   9  -7  -2    5.39    0.71
  -9   7   2    3.66    0.99
   9  -7  -1    4.41    0.70
   9  -7  -1    5.58    0.71
  -9   7   1    4.80    0.97
   9  -7   0   53.33    2.00
   9  -7   0   49.65    1.86
  -9   7   0   49.13    2.00
   9  -7   1    0.63    0.52
   9  -7   1    0.53    0.45
  -9   7  -1   -0.35    0.67
   9  -7   2    7.53    0.89
   9  -7   2    8.45    0.92
  -9   7  -2    9.15    0.92
   9  -7   3    1.92    0.64
   9  -7   3    2.52    0.65
  -9   7  -3    2.82    0.68
   9  -7   4   11.48    1.14
   9  -7   4   11.56    1.15
   9  -7   5   16.00    1.46
   9  -7   5   12.37    1.26
   9  -7   6   22.61    1.70
   9  -7   6   25.62    1.69
   9  -7   7    1.51    0.76
   9  -7   7    1.37    0.81
   9  -7   8    3.43    0.96
   9  -7   8    2.64    0.88
   9  -7   9    1.00    0.84
   9  -7  10    2.32    0.99
   9  -7  11    0.64    0.96
   9  -7  12    0.01    0.93
 -10   7  13    0.70    1.33
 -10   7  12    7.21    1.63
 -10   7  11    0.22    1.20
 -10   7  10    0.68    1.14
 -10   7   9    1.54    1.10
 -10   7   8   33.87    2.20
 -10   7   7    1.05    1.05
 -10   7   7    1.70    0.93
 -10   7   6    7.40    1.25
 -10   7   6    6.94    1.01
 -10   7   5    3.26    1.01
  10  -7  -4    1.08    0.49
 -10   7   4    1.35    0.92
  10  -7  -3   10.51    0.93
 -10   7   3   11.35    1.31
  10  -7  -2   20.16    1.36
 -10   7   2   20.71    1.65
  10  -7  -1   19.80    1.29
  10  -7  -1   18.59    1.35
 -10   7   1   19.29    1.54
  10  -7   0    2.86    0.62
  10  -7   0    4.00    0.72
 -10   7   0    3.26    0.88
  10  -7   1    2.54    0.65
  10  -7   1    2.99    0.70
 -10   7  -1    2.71    0.79
  10  -7   2   21.73    1.42
  10  -7   2   22.77    1.54
 -10   7  -2   21.24    1.31
  10  -7   3    0.78    0.62
  10  -7   3    1.45    0.59
  10  -7   4   12.09    1.20
  10  -7   4   10.72    1.18
  10  -7   5    0.83    0.65
  10  -7   5    0.75    0.68
  10  -7   6    8.23    1.12
  10  -7   6   10.06    1.24
  10  -7   7    6.81    1.06
  10  -7   7    5.94    1.12
  10  -7   8    1.28    0.84
  10  -7   9   -0.50    0.78
  10  -7  10   -0.54    0.86
  10  -7  11   -0.42    0.93
  10  -7  12    8.73    1.57
 -11   7  13    2.35    1.40
 -11   7  12    6.42    1.60
 -11   7  11    3.13    1.38
 -11   7  10    5.52    1.41
 -11   7   9    2.88    1.19
 -11   7   8    1.30    1.11
 -11   7   7    0.69    1.03
 -11   7   6    1.15    0.86
 -11   7   6    0.40    0.98
 -11   7   5   10.53    1.38
 -11   7   4   11.72    1.40
  11  -7  -3   -0.28    0.47
 -11   7   3    1.16    0.88
  11  -7  -2    1.08    0.57
 -11   7   2    0.34    0.81
  11  -7  -1    3.91    0.75
  11  -7  -1    3.31    0.70
 -11   7   1    4.10    0.95
  11  -7   0    0.73    0.55
  11  -7   0    1.27    0.61
 -11   7   0    1.74    0.79
  11  -7   1   17.42    1.35
  11  -7   1   16.14    1.42
 -11   7  -1   16.63    1.37
  11  -7   2    1.53    0.61
  11  -7   2    1.16    0.67
 -11   7  -2    2.01    0.70
  11  -7   3   -0.27    0.58
  11  -7   3    0.21    0.56
  11  -7   4   49.52    2.26
  11  -7   4   45.98    2.20
  11  -7   5    0.05    0.66
  11  -7   5   -0.41    0.63
  11  -7   6   24.65    1.81
  11  -7   6   25.45    1.87
  11  -7   7   17.88    1.74
  11  -7   8    2.63    0.96
  11  -7   9    3.05    1.11
  11  -7  10    5.68    1.37
  11  -7  11    3.67    1.26
 -12   7  12    1.26    1.36
 -12   7  11    1.42    1.31
 -12   7  10   -0.41    1.17
 -12   7   9    6.72    1.48
 -12   7   8   21.91    2.03
 -12   7   7    0.90    1.05
 -12   7   6   22.14    1.87
 -12   7   5    1.69    1.08
 -12   7   4    4.77    1.14
  12  -7  -3   11.11    1.05
 -12   7   3   11.50    1.41
  12  -7  -2   44.77    1.96
 -12   7   2   47.21    2.26
  12  -7  -1    0.40    0.59
  12  -7  -1    0.23    0.57
 -12   7   1    2.09    0.90
  12  -7   0    2.07    0.73
  12  -7   0    1.25    0.63
 -12   7   0    1.35    0.84
  12  -7   1   17.53    1.55
  12  -7   1   15.05    1.41
 -12   7  -1   16.22    1.47
  12  -7   2    2.14    0.74
  12  -7   2    1.81    0.77
  12  -7   3    1.24    0.67
  12  -7   3   -0.21    0.66
  12  -7   4    1.92    0.75
  12  -7   4    2.00    0.84
  12  -7   5    3.36    0.88
  12  -7   5    2.24    0.89
  12  -7   6    0.52    0.73
  12  -7   7   -0.03    0.75
  12  -7   8    5.49    1.19
  12  -7   9    7.01    1.37
  12  -7  10   -0.42    0.87
 -13   7  11    1.52    1.32
 -13   7  10    1.34    1.29
 -13   7   9    2.73    1.32
 -13   7   8    2.38    1.29
 -13   7   7    3.17    1.21
 -13   7   6    5.06    1.27
 -13   7   5    0.80    1.06
 -13   7   4   29.39    2.10
 -13   7   3   -0.10    0.95
  13  -7  -2    1.02    0.64
 -13   7   2    1.81    0.99
  13  -7  -1    7.05    0.99
 -13   7   1    8.04    1.20
  13  -7   0    1.10    0.69
  13  -7   0    0.83    0.68
 -13   7   0    4.14    0.96
  13  -7   1    8.42    1.12
  13  -7   1   11.27    1.22
  13  -7   2    0.15    0.67
  13  -7   2   -0.01    0.57
  13  -7   3    3.56    0.88
  13  -7   3    4.01    0.97
  13  -7   4   24.70    1.86
  13  -7   4   26.69    1.98
  13  -7   5    8.51    1.25
  13  -7   6   11.24    1.44
  13  -7   7    5.39    1.20
  13  -7   8    3.19    1.10
  13  -7   9    1.13    0.99
 -14   7  10    2.11    1.37
 -14   7   9    1.42    1.35
 -14   7   8    8.96    1.63
 -14   7   7    7.40    1.50
 -14   7   6    1.73    1.17
 -14   7   5    2.94    1.22
 -14   7   4   20.61    1.91
 -14   7   3    2.48    1.07
 -14   7   2   21.38    1.86
  14  -7  -1    0.84    0.73
 -14   7   1    2.66    1.02
  14  -7   0    0.96    0.70
  14  -7   0   -0.25    0.66
 -14   7   0    1.16    0.88
  14  -7   1    1.44    0.79
  14  -7   1    1.18    0.72
  14  -7   2    2.67    0.83
  14  -7   3   11.92    1.38
  14  -7   4    3.13    0.94
  14  -7   5    1.98    0.87
  14  -7   6    4.33    1.12
  14  -7   7   -0.29    0.77
  14  -7   8   12.36    1.62
 -15   7   9    4.81    1.48
 -15   7   8    2.86    1.38
 -15   7   7    2.51    1.31
 -15   7   6    2.10    1.27
 -15   7   5    5.38    1.43
 -15   7   4    4.96    1.33
 -15   7   3    0.36    1.04
 -15   7   2    2.07    1.11
 -15   7   1    1.21    1.00
  15  -7   0   13.17    1.44
  15  -7   1   -0.36    0.69
  15  -7   2    6.20    1.10
  15  -7   3    1.14    0.82
  15  -7   4   11.79    1.47
  15  -7   5    2.54    0.95
  15  -7   6    0.79    0.83
 -16   7   7    1.31    1.32
 -16   7   6    1.31    1.21
 -16   7   5    1.38    1.22
 -16   7   4    3.23    1.31
 -16   7   3    2.43    1.21
 -16   7   2    7.60    1.43
  16  -7   1   -0.02    0.80
  16  -7   2    0.97    0.88
  16  -7   3    9.09    1.36
  16  -7   4    3.43    1.02
  16  -7   5    0.28    0.80
 -17   7   5    4.30    1.39
 -17   7   4    1.01    1.19
 -17   7   3    0.44    1.11
 -17   7   2    4.27    1.28
  17   8   1    4.60    1.45
  17   8   0    3.11    1.21
  17   8  -1    9.10    1.62
  17   8  -2    0.76    1.07
  17   8  -3    5.63    1.43
  17   8  -4    0.13    1.06
  16   8   4    0.42    0.89
  16   8   3    0.64    1.06
  16   8   3    0.20    0.83
  16   8   2    1.40    1.10
  16   8   2   -0.71    0.85
  16   8   1   13.78    1.84
  16   8   0    1.88    1.17
  16   8  -1    8.68    1.62
  16   8  -2    0.71    1.01
  16   8  -3    3.48    1.23
  16   8  -4    1.38    1.06
  16   8  -5    1.68    1.05
  16   8  -6   -0.29    0.93
 -16  -8   7    1.49    1.34
  16   8  -7    0.68    1.01
  15   8   6    4.11    1.20
  15   8   5   -0.19    0.81
  15   8   4    2.18    1.18
  15   8   4    0.70    0.89
  15   8   3    3.44    1.11
  15   8   3    5.30    1.32
  15   8   2    1.90    0.98
  15   8   2    2.29    1.12
  15   8   1    0.50    0.98
  15   8   0    3.30    1.19
  15   8  -1    6.86    1.40
  15   8  -2    3.14    1.20
  15   8  -3   10.06    1.55
  15   8  -4    0.63    0.99
  15   8  -5   10.25    1.58
  15   8  -6    1.99    1.05
 -15  -8   7    0.58    1.32
  15   8  -7    0.57    1.01
 -15  -8   8    1.35    1.44
  15   8  -8    2.26    1.09
  15   8  -9    4.25    1.27
  14   8   8    2.83    1.17
  14   8   7    5.47    1.26
  14   8   6    1.25    0.92
  14   8   5    9.03    1.39
  14   8   4    1.50    0.91
  14   8   4    2.04    1.12
  14   8   3    0.65    1.02
  14   8   3   -0.32    0.75
  14   8   2   -0.94    0.69
  14   8   2   -0.02    0.89
  14   8   1   11.26    1.47
  14   8   1    8.44    1.43
  14   8   0   -0.53    0.86
  14   8  -1    2.89    1.12
  14   8  -2    0.64    0.93
  14   8  -3    5.59    1.30
  14   8  -4    0.60    0.92
  14   8  -5   22.82    1.99
  14   8  -6    1.63    1.03
 -14  -8   7    1.75    1.35
  14   8  -7    0.39    0.92
 -14  -8   8   -0.20    1.32
  14   8  -8    0.85    0.98
 -14  -8   9    1.86    1.55
  14   8  -9    1.86    1.07
 -14  -8  10    1.65    1.61
  14   8 -10    0.81    1.03
  13   8   9   15.80    1.87
  13   8   8    0.70    0.98
  13   8   7   11.93    1.60
  13   8   6    4.52    1.13
  13   8   5    3.27    1.04
  13   8   5    2.09    1.12
  13   8   4    1.74    0.85
  13   8   4    1.67    1.02
  13   8   3    1.01    0.93
  13   8   3    0.41    0.75
  13   8   2    1.96    1.00
  13   8   2    2.28    0.89
  13   8   1    4.01    1.01
  13   8   1    5.46    1.22
  13   8   0    2.32    1.01
  13   8  -1    6.11    1.20
  13   8  -2    2.86    1.06
  13   8  -3   24.52    1.94
  13   8  -4    2.71    1.08
  13   8  -5    1.14    0.91
  13   8  -6    0.14    0.85
 -13  -8   7    8.37    1.60
  13   8  -7    7.69    1.37
 -13  -8   8    1.83    1.39
  13   8  -8    0.14    0.88
 -13  -8   9   -0.13    1.39
  13   8  -9    1.36    0.99
 -13  -8  10   -1.09    1.49
  13   8 -10    0.67    0.96
 -13  -8  11    0.24    1.59
  13   8 -11    0.94    1.03
  12   8  10    1.10    1.02
  12   8   9    1.96    1.04
  12   8   8    0.13    0.85
  12   8   7    1.95    0.96
  12   8   6    0.41    1.00
  12   8   6   -1.02    0.71
  12   8   5   52.88    2.73
  12   8   5   59.07    2.76
  12   8   4    7.11    1.19
  12   8   4    7.57    1.31
  12   8   3    8.52    1.36
  12   8   3    8.51    1.21
  12   8   2    2.23    0.99
  12   8   2    1.99    0.83
  12   8   1    0.81    0.72
  12   8   1    0.32    0.85
  12   8   0    0.82    0.85
  12   8  -1    0.94    0.88
  12   8  -2    0.43    0.83
  12   8  -3    7.70    1.25
  12   8  -4    2.90    1.04
  12   8  -5   30.37    2.11
  12   8  -6    2.34    0.97
 -12  -8   7    0.11    1.13
  12   8  -7    0.43    0.83
 -12  -8   8   -0.47    1.15
  12   8  -8   -0.01    0.87
 -12  -8   9    0.90    1.40
  12   8  -9    2.47    1.03
 -12  -8  10    1.42    1.49
  12   8 -10    0.71    0.93
 -12  -8  11   -0.26    1.60
  12   8 -11    2.86    1.09
 -12  -8  12   -4.20    1.37
  12   8 -12    0.08    1.02
  11   8  11    4.96    1.34
  11   8  10    2.93    1.10
  11   8   9    8.69    1.41
  11   8   8    5.73    1.25
  11   8   7    2.04    1.09
  11   8   7    1.40    0.85
  11   8   6    0.86    0.77
  11   8   6    0.66    0.97
  11   8   5    1.35    0.81
  11   8   5    1.53    1.01
  11   8   4    2.40    1.05
  11   8   4    3.05    0.86
  11   8   3    0.93    0.71
  11   8   3    0.47    0.85
  11   8   2   -0.33    0.80
  11   8   2    1.33    0.74
  11   8   1   52.30    2.38
  11   8   1   58.34    2.56
  11   8   0    0.39    0.80
  11   8  -1    5.95    1.11
  11   8  -2    1.62    0.90
  11   8  -3   23.96    1.78
  11   8  -4    1.11    0.80
  11   8  -5    1.15    0.85
  11   8  -6    1.23    0.86
 -11  -8   7   19.57    2.02
  11   8  -7   17.65    1.66
 -11  -8   8    1.98    1.27
  11   8  -8    2.55    0.92
 -11  -8   9    5.76    1.55
  11   8  -9    6.75    1.25
 -11  -8  10   -1.88    1.29
  11   8 -10    0.67    0.87
 -11  -8  11   -0.29    1.46
  11   8 -11    0.64    0.94
 -11  -8  12   -1.62    1.50
  11   8 -12    0.77    0.99
  10   8  11    0.24    0.91
  10   8  10    1.43    0.96
  10   8   9    0.59    0.83
  10   8   8    0.78    0.79
  10   8   7   -1.16    0.89
  10   8   7   -0.44    0.73
  10   8   6    7.43    1.27
  10   8   6    6.86    1.14
  10   8   5   21.45    1.74
  10   8   5   20.51    1.88
  10   8   4    9.80    1.20
  10   8   4   11.17    1.42
  10   8   3    3.94    1.05
  10   8   3    3.83    0.88
  10   8   2    3.15    0.81
  10   8   2    2.22    0.90
  10   8   1   41.68    2.09
  10   8   1   40.85    2.21
  10   8   0    0.96    0.68
  10   8   0    0.38    0.73
  10   8  -1    8.15    1.19
  10   8  -2    1.66    0.82
  10   8  -3    0.65    0.74
  10   8  -4    0.22    0.71
  10   8  -5    1.29    0.82
  10   8  -6    3.10    0.97
 -10  -8   7    1.52    1.16
  10   8  -7    1.82    0.86
 -10  -8   8    1.12    1.21
  10   8  -8    2.23    0.91
 -10  -8   9   21.13    2.17
  10   8  -9   24.88    1.84
 -10  -8  10    2.01    1.42
  10   8 -10    1.20    0.92
 -10  -8  11   30.13    2.93
  10   8 -11   30.61    2.12
 -10  -8  12   -0.44    1.50
  10   8 -12    0.56    0.98
 -10  -8  13    0.68    1.61
  10   8 -13    3.37    1.18
   9   8  12    2.58    1.16
   9   8  11    7.85    1.43
   9   8  10    2.00    0.98
   9   8   9    1.35    0.89
   9   8   8   -0.43    0.95
   9   8   8    0.50    0.77
   9   8   7   18.24    1.87
   9   8   7   17.14    1.62
   9   8   6    0.93    0.90
   9   8   6    1.41    0.72
   9   8   5   20.70    1.63
   9   8   5   17.07    1.72
   9   8   4    1.02    0.81
   9   8   4    0.48    0.60
   9   8   3   97.17    3.23
   9   8   3  100.69    3.19
   9   8   2    3.30    0.93
   9   8   2    2.33    0.71
   9   8   1    3.70    0.95
   9   8   1    4.51    0.86
   9   8   0   10.35    1.15
   9   8   0   11.37    1.31
   9   8  -1    1.53    0.81
   9   8  -2   -0.14    0.69
   9   8  -3    7.05    1.10
   9   8  -4    2.80    0.86
   9   8  -5   17.33    1.53
  -9  -8   6    1.08    1.04
   9   8  -6    1.38    0.81
  -9  -8   7    6.83    1.38
   9   8  -7    9.89    1.25
  -9  -8   8   -2.22    1.02
   9   8  -8   -0.07    0.73
  -9  -8   9    3.88    1.40
   9   8  -9    4.48    1.05
  -9  -8  10    0.55    1.28
   9   8 -10    0.99    0.87
  -9  -8  11    8.55    1.79
   9   8 -11    8.49    1.34
  -9  -8  12    0.88    1.56
   9   8 -12   -0.50    0.91
  -9  -8  13   -0.10    1.52
   8   8  13    0.51    1.04
   8   8  12    0.72    0.98
   8   8  11    2.00    1.04
   8   8  10    0.65    0.82
   8   8   9   27.24    2.06
   8   8   9   26.35    2.14
   8   8   8    7.81    1.33
   8   8   8    6.01    1.11
   8   8   7   -0.17    0.62
   8   8   7   -0.49    0.88
   8   8   6    0.87    0.66
   8   8   6    0.22    0.87
   8   8   5   10.89    1.31
   8   8   5   10.92    1.18
   8   8   4    0.82    0.82
   8   8   4    0.28    0.58
   8   8   3    2.66    0.94
   8   8   3    2.75    0.72
   8   8   2    1.24    0.79
   8   8   2    1.53    0.64
   8   8   1   26.13    1.72
   8   8   1   27.41    1.63
   8   8   0   11.15    1.10
   8   8   0   10.76    1.22
   8   8  -1   29.91    1.76
   8   8  -2    3.71    0.88
   8   8  -3    0.48    0.70
   8   8  -4    2.56    0.83
  -8  -8   5    3.50    0.64
   8   8  -5    4.48    0.93
  -8  -8   6    2.44    1.07
   8   8  -6    1.85    0.80
  -8  -8   7    3.73    1.21
   8   8  -7    3.89    0.92
  -8  -8   8    2.59    1.19
   8   8  -8    1.23    0.77
  -8  -8   9    9.10    1.61
   8   8  -9    8.76    1.19
  -8  -8  10   -1.15    1.15
   8   8 -10    0.36    0.76
  -8  -8  11    7.10    1.67
   8   8 -11    8.44    1.29
  -8  -8  12   -0.50    1.32
   8   8 -12    0.32    0.88
  -8  -8  13    0.27    1.44
  -8  -8  14   -2.51    1.37
   7   8  13    7.04    1.44
   7   8  12   -0.20    0.88
   7   8  11    6.25    1.29
   7   8  10    1.46    0.90
   7   8   9    1.09    1.03
   7   8   9    1.82    0.85
   7   8   8    0.41    0.98
   7   8   8    0.06    0.65
   7   8   7   12.61    1.44
   7   8   7    9.81    1.19
   7   8   6   -0.26    0.81
   7   8   6   -0.39    0.50
   7   8   5    1.53    0.89
   7   8   5    1.12    0.60
   7   8   4    3.73    0.96
   7   8   4    3.55    0.75
   7   8   3   18.27    1.55
   7   8   3   17.40    1.36
   7   8   2    0.90    0.54
   7   8   2    1.16    0.75
   7   8   1    4.60    0.75
   7   8   1    4.84    0.92
   7   8   0   11.12    1.17
   7   8   0   12.75    1.23
   7   8  -1   48.68    2.09
   7   8  -2    6.03    0.95
   7   8  -3  146.60    3.88
  -7  -8   4   15.36    1.34
   7   8  -4   14.59    1.39
  -7  -8   5   56.67    2.75
  -7  -8   5   54.47    1.77
   7   8  -5   52.43    2.20
  -7  -8   6    0.12    0.97
   7   8  -6    0.64    0.68
  -7  -8   7    4.83    1.24
   7   8  -7    4.67    0.92
  -7  -8   8   -0.52    0.99
   7   8  -8    0.90    0.69
  -7  -8   9   -0.31    1.08
   7   8  -9    0.34    0.68
  -7  -8  10    0.52    1.19
   7   8 -10    0.63    0.76
  -7  -8  11    8.81    1.66
   7   8 -11   15.95    1.53
  -7  -8  12    0.19    1.27
  -7  -8  13    4.00    1.63
  -7  -8  14   -0.89    1.45
   6   8  14   -0.28    0.99
   6   8  13   -0.79    0.93
   6   8  12    0.80    0.91
   6   8  11    7.00    1.27
   6   8  10    4.42    1.10
   6   8  10    3.68    1.22
   6   8   9   29.44    2.02
   6   8   9   25.61    2.16
   6   8   8    4.09    1.18
   6   8   8    5.27    0.97
   6   8   7   -0.62    0.84
   6   8   7    0.12    0.57
   6   8   6   -0.08    0.53
   6   8   6   -0.29    0.84
   6   8   5   27.68    1.91
   6   8   5   26.72    1.55
   6   8   4    0.31    0.51
   6   8   4    0.74    0.80
   6   8   3    5.44    0.76
   6   8   3    5.81    0.99
   6   8   2    0.44    0.68
   6   8   2    0.08    0.43
   6   8   1   11.79    1.10
   6   8   1    9.31    1.05
   6   8   0   15.56    1.17
   6   8   0   12.99    1.29
   6   8  -1    1.47    0.66
   6   8  -2    0.03    0.58
   6   8  -3   33.41    1.71
  -6  -8   4   27.16    1.41
   6   8  -4   30.90    1.65
  -6  -8   5   66.68    1.88
  -6  -8   5   62.08    2.80
   6   8  -5   65.82    2.39
  -6  -8   6    6.55    1.27
  -6  -8   6    6.39    0.63
   6   8  -6    5.41    0.92
  -6  -8   7    1.35    1.06
   6   8  -7    0.13    0.67
  -6  -8   8    0.71    1.06
   6   8  -8    2.19    0.73
  -6  -8   9    1.02    1.10
   6   8  -9    2.04    0.77
  -6  -8  10   -0.69    1.13
   6   8 -10    0.04    0.68
  -6  -8  11    0.15    1.16
   6   8 -11   -0.73    0.69
  -6  -8  12    0.50    1.28
  -6  -8  13    9.56    1.86
  -6  -8  14   -1.22    1.34
   5   8  14   -0.25    1.01
   5   8  13    6.39    1.32
   5   8  12    2.67    1.07
   5   8  11    2.06    0.93
   5   8  10   -0.64    1.02
   5   8  10    0.54    0.78
   5   8   9   27.70    2.11
   5   8   9   30.43    1.97
   5   8   8    0.50    0.96
   5   8   8    1.40    0.71
   5   8   7   13.17    1.46
   5   8   7   17.13    1.39
   5   8   6   26.69    1.54
   5   8   6   23.81    1.92
   5   8   5   -0.23    0.44
   5   8   5    0.99    0.86
   5   8   4    3.30    0.62
   5   8   4    6.21    1.04
   5   8   3    4.60    0.66
   5   8   3    5.40    0.96
   5   8   2    1.04    0.71
   5   8   2    1.14    0.46
   5   8   1   14.23    1.25
   5   8   1   12.06    1.00
   5   8   0    0.33    0.58
   5   8  -1   90.61    2.61
   5   8  -2   11.74    1.16
  -5  -8   3  200.39    3.99
   5   8  -3  198.63    4.54
  -5  -8   4    1.39    0.51
  -5  -8   4    0.46    0.80
   5   8  -4    1.26    0.63
  -5  -8   5   24.01    1.23
  -5  -8   5   26.38    2.02
   5   8  -5   21.93    1.42
  -5  -8   6    0.58    0.41
  -5  -8   6    0.51    0.95
   5   8  -6    0.36    0.60
  -5  -8   7   32.47    2.43
  -5  -8   7   31.53    1.20
   5   8  -7   31.09    1.73
  -5  -8   8    4.75    1.25
   5   8  -8    4.70    0.86
  -5  -8   9    5.84    1.32
   5   8  -9    7.11    0.97
  -5  -8  10    1.05    1.11
   5   8 -10   -0.44    0.63
  -5  -8  11    5.56    1.39
  -5  -8  12   -0.48    1.14
  -5  -8  13   -0.79    1.17
  -5  -8  14   -0.66    1.29
  -5  -8  15   -0.41    1.30
   4   8  14    0.66    1.00
   4   8  13    1.34    1.02
   4   8  12    0.61    0.90
   4   8  11    3.76    1.02
   4   8  11    2.83    1.29
   4   8  10    0.41    0.71
   4   8  10   -1.03    1.08
   4   8   9    1.46    0.74
   4   8   9   -0.26    1.00
   4   8   8    0.34    0.95
   4   8   8    0.23    0.56
   4   8   7   37.03    1.85
   4   8   7   38.17    2.27
   4   8   6   13.94    1.47
   4   8   6   15.79    1.29
   4   8   5   88.26    2.55
   4   8   5   85.80    2.86
   4   8   4   34.77    1.49
   4   8   4   32.87    1.88
   4   8   3   86.62    2.34
   4   8   3   83.31    2.62
   4   8   2    0.38    0.62
   4   8   2    0.05    0.31
   4   8   1    1.92    0.66
   4   8   1    3.11    0.50
   4   8   0    5.78    0.78
   4   8  -1    0.01    0.49
   4   8  -2   -0.13    0.49
  -4  -8   3    0.97    0.46
   4   8  -3    1.67    0.58
  -4  -8   4   10.75    0.99
  -4  -8   4    7.90    1.00
   4   8  -4   10.43    1.02
  -4  -8   5   30.59    2.03
  -4  -8   5   32.38    1.30
   4   8  -5   31.12    1.54
  -4  -8   6    0.02    0.39
  -4  -8   6    0.53    0.91
   4   8  -6    0.05    0.53
  -4  -8   7    1.53    1.04
  -4  -8   7    0.38    0.39
   4   8  -7    1.27    0.66
  -4  -8   8    0.42    1.03
   4   8  -8    0.07    0.56
  -4  -8   9    0.68    1.01
   4   8  -9    1.19    0.63
  -4  -8  10    1.22    1.09
   4   8 -10    2.16    0.76
  -4  -8  11    3.05    1.21
  -4  -8  12    0.00    1.07
  -4  -8  13    4.45    1.44
  -4  -8  14   -1.24    1.18
  -4  -8  15   -0.77    1.25
   3   8  14   -0.96    0.90
   3   8  13   12.56    1.60
   3   8  12    4.60    1.13
   3   8  11   -0.68    1.11
   3   8  11    0.64    0.82
   3   8  10    4.45    0.95
   3   8  10    3.57    1.24
   3   8   9   -0.29    0.98
   3   8   9    0.37    0.66
   3   8   8    0.03    0.58
   3   8   8    1.03    1.01
   3   8   7    3.91    0.75
   3   8   7    4.13    1.15
   3   8   6    1.62    0.57
   3   8   6    1.61    0.98
   3   8   5    0.99    0.45
   3   8   5    1.44    0.89
   3   8   4   16.29    1.58
   3   8   4   13.01    0.98
   3   8   3  124.81    2.89
   3   8   3  129.96    3.35
   3   8   2    7.13    0.89
   3   8   2    9.43    0.76
   3   8   1   19.15    1.27
   3   8   1   20.22    0.99
   3   8   0   27.05    1.38
   3   8  -1    8.35    0.83
  -3  -8   2    6.07    0.64
   3   8  -2    7.70    0.82
  -3  -8   3   12.81    0.99
  -3  -8   3   12.75    1.27
   3   8  -3   14.04    1.03
  -3  -8   4    5.38    0.88
  -3  -8   4    7.00    0.65
   3   8  -4    8.40    0.83
  -3  -8   5    1.11    0.43
  -3  -8   5    0.74    0.79
   3   8  -5    0.44    0.50
  -3  -8   6   40.74    2.23
  -3  -8   6   37.83    1.38
   3   8  -6   39.15    1.61
  -3  -8   7  115.79    2.65
  -3  -8   7  125.35    3.79
   3   8  -7  122.80    3.10
  -3  -8   8   10.81    1.40
  -3  -8   8    9.79    0.89
   3   8  -8   10.67    1.04
  -3  -8   9   55.98    2.77
   3   8  -9   55.50    1.99
  -3  -8  10   -1.32    0.91
  -3  -8  11    5.15    1.32
  -3  -8  12   -1.60    0.96
  -3  -8  13    0.15    1.10
  -3  -8  14   -1.35    1.07
  -3  -8  15   -0.39    1.23
   2   8  15    1.56    1.14
   2   8  14    2.22    1.12
   2   8  13   13.55    1.64
   2   8  12    0.41    0.80
   2   8  12   -1.22    1.17
   2   8  11    9.91    1.58
   2   8  11   11.14    1.34
   2   8  10    2.34    1.21
   2   8  10    2.10    0.84
   2   8   9   47.04    2.15
   2   8   9   39.71    2.40
   2   8   8    1.26    0.62
   2   8   8    0.96    1.08
   2   8   7   76.58    2.45
   2   8   7   77.47    2.90
   2   8   6    0.61    0.47
   2   8   6   -0.61    0.91
   2   8   5  110.32    2.74
   2   8   5  111.03    3.23
   2   8   4   18.38    1.00
   2   8   4   20.84    1.55
   2   8   3    3.72    0.81
   2   8   3    2.45    0.40
   2   8   2    8.59    0.67
   2   8   2    6.90    0.88
   2   8   1   31.30    1.08
   2   8   1   31.70    1.50
   2   8   0   71.63    2.12
  -2  -8   1    0.36    0.40
   2   8  -1    0.37    0.47
  -2  -8   2   29.70    1.37
  -2  -8   2   33.51    1.31
   2   8  -2   32.99    1.38
  -2  -8   3    0.43    0.38
  -2  -8   3   -0.06    0.53
   2   8  -3    0.09    0.42
  -2  -8   4    1.96    0.44
  -2  -8   4    2.08    0.70
   2   8  -4    2.23    0.53
  -2  -8   5   18.85    1.62
  -2  -8   5   20.82    1.11
   2   8  -5   19.43    1.13
  -2  -8   6    1.07    0.43
  -2  -8   6    1.75    0.86
   2   8  -6    0.51    0.48
  -2  -8   7    1.76    0.46
  -2  -8   7    1.90    0.94
   2   8  -7    1.98    0.57
  -2  -8   8   24.69    1.22
  -2  -8   8   27.04    2.12
   2   8  -8   23.73    1.27
  -2  -8   9    8.05    1.29
  -2  -8   9    8.89    0.76
  -2  -8  10    1.09    1.02
  -2  -8  11   13.78    1.65
  -2  -8  12    2.86    1.19
  -2  -8  13   -1.09    1.00
  -2  -8  14   -1.77    1.04
  -2  -8  15   -1.58    1.15
   1   8  14    2.84    1.15
   1   8  13   19.75    1.96
   1   8  12   -0.63    1.20
   1   8  12    2.36    0.97
   1   8  11   15.05    1.50
   1   8  11   14.44    1.73
   1   8  10    2.36    0.82
   1   8  10    1.35    1.21
   1   8   9    1.67    1.08
   1   8   9    0.59    0.64
   1   8   8    5.05    1.25
   1   8   8    5.02    0.81
   1   8   7    1.60    1.09
   1   8   7    1.14    0.57
   1   8   6    0.66    0.46
   1   8   6    0.58    0.95
   1   8   5    0.06    0.35
   1   8   5   -0.22    0.84
   1   8   4    6.06    0.97
   1   8   4    4.76    0.50
   1   8   3  318.37    5.76
   1   8   3  317.11    6.43
   1   8   2    9.55    0.61
   1   8   2    9.43    0.94
   1   8   1  120.74    2.98
  -1  -8   0   90.43    2.23
   1   8   0   86.16    2.36
  -1  -8   1   13.57    0.93
  -1  -8   1   14.34    1.00
   1   8  -1   12.14    0.97
  -1  -8   2   52.43    1.68
  -1  -8   2   52.28    1.59
   1   8  -2   50.10    1.63
  -1  -8   3  146.16    3.39
  -1  -8   3  146.53    3.10
   1   8  -3  151.60    3.25
  -1  -8   4   11.71    0.89
  -1  -8   4   10.46    0.97
   1   8  -4   12.21    0.88
  -1  -8   5    2.10    0.47
  -1  -8   5    4.42    0.82
   1   8  -5    2.32    0.50
  -1  -8   6    0.53    0.76
  -1  -8   6    0.63    0.42
   1   8  -6    0.12    0.40
  -1  -8   7    0.58    0.43
  -1  -8   7    0.69    0.84
   1   8  -7    0.90    0.46
  -1  -8   8   -0.02    0.43
  -1  -8   8    0.08    0.87
   1   8  -8   -0.22    0.45
  -1  -8   9   -0.03    0.41
  -1  -8   9    0.05    0.81
  -1  -8  10    1.81    0.96
  -1  -8  10    1.54    0.56
  -1  -8  11   25.84    2.13
  -1  -8  12    1.67    1.07
  -1  -8  13    8.86    1.52
  -1  -8  14    0.43    1.14
  -1  -8  15   -1.79    1.06
   0   8  14   -0.69    0.94
   0   8  13   -1.09    1.35
   0   8  13   -1.48    0.80
   0   8  12    5.48    1.48
   0   8  12    3.92    1.03
   0   8  11    8.73    1.61
   0   8  11    8.84    1.20
   0   8  10    4.95    0.96
   0   8  10    4.89    1.33
   0   8   9   59.06    2.77
   0   8   9   61.77    2.33
   0   8   8   26.54    1.58
   0   8   8   29.60    2.29
   0   8   7   10.57    1.38
   0   8   7    8.24    0.83
   0   8   6    3.91    0.59
   0   8   6    5.55    1.13
   0   8   5    0.46    0.34
   0   8   5    0.86    0.85
   0   8   4    1.56    0.80
   0   8   4    1.32    0.31
   0   8   3   28.87    1.61
   0   8   3   26.90    0.86
   0   8   2   68.71    1.42
   0   8   2   65.32    2.15
   0  -8  -1   63.72    1.84
   0   8   1   62.78    2.04
   0  -8   0   21.99    1.14
   0  -8   0   20.75    0.86
   0   8   0   21.68    1.20
   0  -8   1   63.48    1.65
   0  -8   1   61.65    1.74
   0   8  -1   62.71    1.86
   0  -8   2   69.69    1.92
   0  -8   2   67.63    1.85
   0   8  -2   68.86    1.87
   0  -8   3   26.75    1.19
   0  -8   3   27.42    1.38
   0   8  -3   27.24    1.14
   0  -8   4    0.99    0.55
   0  -8   4    1.59    0.42
   0   8  -4    1.42    0.42
   0  -8   5   -0.24    0.35
   0  -8   5   -0.14    0.59
   0   8  -5    0.35    0.36
   0  -8   6    4.98    0.61
   0  -8   6    4.10    0.89
   0   8  -6    5.10    0.55
   0  -8   7    8.07    1.10
   0  -8   7    8.24    0.76
   0   8  -7    8.79    0.75
   0  -8   8   25.00    1.35
   0  -8   8   27.42    1.98
   0  -8   9   57.99    2.60
   0  -8   9   58.08    1.97
   0  -8  10    3.97    0.70
   0  -8  10    3.91    1.07
   0  -8  11    7.67    1.30
   0  -8  11    8.86    0.91
   0  -8  12    4.81    1.23
   0  -8  13   -1.31    0.94
   0  -8  14   -0.97    1.08
   0  -8  15   -2.43    0.98
  -1   8  13    9.92    1.81
  -1   8  13   11.65    1.47
  -1   8  12    0.37    0.86
  -1   8  12    1.21    1.31
  -1   8  11   29.17    1.92
  -1   8  11   28.56    2.38
  -1   8  10    2.07    0.78
  -1   8  10    2.00    1.23
  -1   8   9    0.65    1.09
  -1   8   9   -0.33    0.60
  -1   8   8   -0.46    1.12
  -1   8   8    0.25    0.59
  -1   8   7    1.70    0.58
  -1   8   7    0.45    1.08
  -1   8   6    0.53    0.96
  -1   8   6   -0.08    0.41
  -1   8   5    3.19    0.98
  -1   8   5    2.40    0.43
  -1   8   4   12.73    0.66
  -1   8   4   10.90    1.13
   1  -8  -3  144.14    3.17
  -1   8   3  146.51    3.55
   1  -8  -2   52.36    1.66
  -1   8   2   50.62    1.89
   1  -8  -1   13.15    0.95
  -1   8   1   14.48    1.18
   1  -8   0   90.75    1.77
   1  -8   0   86.83    2.15
  -1   8   0   88.99    2.35
   1  -8   1  127.93    2.78
   1  -8   1  128.57    2.58
  -1   8  -1  121.95    2.85
   1  -8   2    8.99    0.86
   1  -8   2    9.65    0.88
  -1   8  -2   10.34    0.92
   1  -8   3  322.82    5.86
   1  -8   3  325.97    6.13
  -1   8  -3  316.52    5.93
   1  -8   4    5.61    0.74
   1  -8   4    4.69    0.57
  -1   8  -4    5.07    0.51
   1  -8   5    0.44    0.57
   1  -8   5   -0.17    0.37
  -1   8  -5    0.25    0.32
   1  -8   6    0.11    0.64
   1  -8   6    0.63    0.45
  -1   8  -6    0.13    0.30
   1  -8   7    0.10    0.71
   1  -8   7   -0.06    0.45
   1  -8   8    4.40    0.97
   1  -8   8    4.17    0.68
   1  -8   9    0.18    0.49
   1  -8   9   -0.31    0.71
   1  -8  10    1.02    0.86
   1  -8  10    2.76    0.69
   1  -8  11   10.31    1.40
   1  -8  11   15.06    1.36
   1  -8  12    1.04    0.98
   1  -8  13   12.91    1.72
   1  -8  14    0.29    1.10
   1  -8  15    0.32    1.12
  -2   8  14   -2.10    1.38
  -2   8  13   -2.15    1.31
  -2   8  12    4.88    1.48
  -2   8  12    4.53    1.07
  -2   8  11   18.07    1.92
  -2   8  11   19.08    1.68
  -2   8  10    2.01    0.81
  -2   8  10    0.90    1.22
  -2   8   9   10.37    1.50
  -2   8   9    7.80    0.98
  -2   8   8   25.74    1.55
  -2   8   8   24.92    2.14
  -2   8   7    0.59    1.08
  -2   8   7    2.14    0.61
  -2   8   6    0.73    0.47
  -2   8   6    0.20    0.98
   2  -8  -5   19.19    1.31
  -2   8   5   18.77    1.69
  -2   8   5   20.19    0.97
   2  -8  -4    1.32    0.50
  -2   8   4    1.80    0.30
  -2   8   4    2.97    0.86
   2  -8  -3   -0.11    0.37
  -2   8   3   -0.51    0.67
   2  -8  -2   31.26    1.30
  -2   8   2   32.64    1.60
   2  -8  -1    0.33    0.37
  -2   8   1    0.61    0.62
   2  -8   0   70.48    1.88
  -2   8   0   70.51    2.01
   2  -8   1   30.44    0.98
   2  -8   1   31.74    1.26
  -2   8  -1   31.29    1.32
   2  -8   2    7.94    0.76
   2  -8   2    6.82    0.63
  -2   8  -2    6.85    0.68
   2  -8   3    2.63    0.49
   2  -8   3    3.41    0.53
  -2   8  -3    3.30    0.50
   2  -8   4   18.92    1.25
   2  -8   4   19.66    1.11
  -2   8  -4   19.14    0.83
   2  -8   5  110.22    2.73
   2  -8   5  109.15    2.94
   2  -8   6    0.13    0.64
   2  -8   6   -0.02    0.44
   2  -8   7   71.68    2.63
   2  -8   7   69.76    2.20
   2  -8   8    1.53    0.55
   2  -8   8    1.15    0.77
   2  -8   9   41.00    1.79
   2  -8   9   38.60    2.14
   2  -8  10    2.30    0.67
   2  -8  10    1.70    0.93
   2  -8  11    9.15    1.35
   2  -8  11   11.24    1.09
   2  -8  12   -0.34    0.87
   2  -8  13   11.79    1.64
   2  -8  14    1.58    1.14
   2  -8  15   -0.89    1.05
  -3   8  14   -0.35    1.47
  -3   8  13    2.18    1.46
  -3   8  12    2.74    1.39
  -3   8  12    1.17    0.90
  -3   8  11    5.80    1.50
  -3   8  11    4.41    1.01
  -3   8  10   -0.26    0.66
  -3   8  10   -1.30    1.10
  -3   8   9   57.84    2.68
  -3   8   9   52.29    2.12
   3  -8  -8    9.55    0.93
  -3   8   8    8.54    0.92
  -3   8   8    9.42    1.48
   3  -8  -7  122.92    3.05
  -3   8   7  125.15    3.76
  -3   8   7  119.77    3.00
   3  -8  -6   40.61    1.71
  -3   8   6   39.63    1.50
  -3   8   6   39.46    2.24
   3  -8  -5    0.98    0.50
  -3   8   5    0.75    0.93
  -3   8   5    0.37    0.40
   3  -8  -4    6.62    0.67
  -3   8   4    7.65    0.64
  -3   8   4    5.90    1.04
   3  -8  -3   12.25    1.02
  -3   8   3   14.44    1.40
   3  -8  -2    6.66    0.62
  -3   8   2    7.56    0.94
   3  -8  -1    7.32    0.65
  -3   8   1    8.62    0.91
   3  -8   0   27.37    0.78
   3  -8   0   28.18    1.22
  -3   8   0   27.84    1.39
   3  -8   1   21.22    1.11
   3  -8   1   20.09    0.80
  -3   8  -1   19.77    1.20
   3  -8   2    8.21    0.75
   3  -8   2    7.25    0.68
  -3   8  -2    7.94    0.73
   3  -8   3  130.39    2.95
   3  -8   3  129.39    2.97
  -3   8  -3  124.53    2.70
   3  -8   4   13.80    1.10
   3  -8   4   13.33    1.13
  -3   8  -4   12.60    0.74
   3  -8   5    0.82    0.49
   3  -8   5    0.82    0.60
   3  -8   6    2.12    0.72
   3  -8   6    2.24    0.56
   3  -8   7    3.64    0.89
   3  -8   7    2.97    0.64
   3  -8   8    0.41    0.69
   3  -8   8    1.27    0.58
   3  -8   9   -0.12    0.69
   3  -8   9    0.11    0.55
   3  -8  10    1.81    0.90
   3  -8  10    4.39    0.83
   3  -8  11    0.32    0.83
   3  -8  11   -0.82    0.61
   3  -8  12    2.70    1.08
   3  -8  13    8.12    1.45
   3  -8  14    0.07    0.99
   3  -8  15   -0.72    1.03
  -4   8  15    2.29    1.68
  -4   8  14   -1.17    1.46
  -4   8  13    2.64    1.48
  -4   8  12   -0.10    1.23
  -4   8  11    2.24    1.32
  -4   8  11    1.50    0.85
  -4   8  10    2.03    1.29
  -4   8  10   -0.47    0.72
  -4   8   9   -0.13    1.11
  -4   8   9    0.71    0.69
   4  -8  -8   -0.26    0.53
  -4   8   8   -0.05    0.65
  -4   8   8   -0.34    1.10
   4  -8  -7    0.52    0.55
  -4   8   7   -0.51    1.07
  -4   8   7    1.65    0.67
   4  -8  -6    0.78    0.49
  -4   8   6   -0.12    0.53
  -4   8   6   -0.69    0.97
   4  -8  -5   31.95    1.38
  -4   8   5   31.18    1.30
   4  -8  -4    8.19    0.70
  -4   8   4    6.44    1.04
  -4   8   4    8.53    0.81
   4  -8  -3    0.63    0.40
  -4   8   3    0.25    0.73
   4  -8  -2    0.98    0.39
  -4   8   2    0.43    0.68
   4  -8  -1    0.29    0.36
  -4   8   1   -0.16    0.63
   4  -8   0    4.71    0.56
   4  -8   0    5.10    0.50
  -4   8   0    5.44    0.79
   4  -8   1    1.95    0.46
   4  -8   1    2.15    0.35
  -4   8  -1    2.76    0.63
   4  -8   2   -0.23    0.34
   4  -8   2    0.11    0.30
  -4   8  -2   -0.17    0.50
   4  -8   3   82.55    2.29
   4  -8   3   78.92    2.18
  -4   8  -3   80.57    1.97
   4  -8   4   34.34    1.54
   4  -8   4   33.25    1.51
   4  -8   5   85.92    2.45
   4  -8   5   86.89    2.60
   4  -8   6   13.40    1.24
   4  -8   6   14.05    1.40
   4  -8   7   40.26    1.76
   4  -8   7   34.22    1.91
   4  -8   8    0.17    0.53
   4  -8   8    0.27    0.65
   4  -8   9    0.53    0.75
   4  -8   9    3.12    0.72
   4  -8  10   -0.86    0.55
   4  -8  10   -0.10    0.75
   4  -8  11    1.08    0.89
   4  -8  11    3.14    0.84
   4  -8  12    0.36    0.93
   4  -8  13   -0.60    0.91
   4  -8  14    0.16    1.06
  -5   8  15    1.42    1.69
  -5   8  14   -0.68    1.48
  -5   8  13   -0.58    1.36
  -5   8  12   -1.06    1.18
  -5   8  11    3.67    1.40
  -5   8  10   -0.63    0.72
  -5   8  10   -0.05    1.17
  -5   8   9    5.12    0.94
  -5   8   9    6.43    1.32
   5  -8  -8    4.42    0.65
  -5   8   8    4.66    0.86
  -5   8   8    6.21    1.25
   5  -8  -7   32.32    1.44
  -5   8   7   32.92    1.70
  -5   8   7   30.41    2.16
   5  -8  -6   -0.12    0.44
  -5   8   6   -0.11    0.61
  -5   8   6   -1.27    0.93
   5  -8  -5   23.17    1.24
  -5   8   5   21.55    1.76
  -5   8   5   22.99    1.32
   5  -8  -4    1.55    0.46
  -5   8   4    0.64    0.49
  -5   8   4    1.22    0.85
   5  -8  -3  185.19    3.76
  -5   8   3  197.30    4.37
  -5   8   3  180.88    3.55
   5  -8  -2   10.08    0.91
  -5   8   2   10.37    1.03
   5  -8  -1   90.45    2.28
   5  -8  -1   89.77    1.92
   5  -8   0    0.65    0.40
   5  -8   0    0.29    0.26
  -5   8   0    0.25    0.60
   5  -8   1   12.90    0.81
   5  -8   1   13.09    0.99
  -5   8  -1   11.20    1.12
   5  -8   2    1.48    0.47
   5  -8   2    1.12    0.39
  -5   8  -2    1.29    0.58
   5  -8   3    3.80    0.63
   5  -8   3    3.94    0.60
  -5   8  -3    4.93    0.64
   5  -8   4    4.18    0.67
   5  -8   4    4.03    0.69
   5  -8   5    0.75    0.56
   5  -8   5   -0.99    0.44
   5  -8   6   23.08    1.62
   5  -8   6   24.60    1.52
   5  -8   7   10.28    1.02
   5  -8   7   12.28    1.24
   5  -8   8    1.19    0.63
   5  -8   8    1.69    0.78
   5  -8   9   27.83    1.71
   5  -8   9   25.54    1.89
   5  -8  10    0.79    0.66
   5  -8  10   -0.15    0.73
   5  -8  11    0.43    0.76
   5  -8  11    0.18    0.80
   5  -8  12    3.08    1.11
   5  -8  13    4.54    1.26
   5  -8  14    0.38    1.01
  -6   8  14   -0.62    1.48
  -6   8  13   10.33    1.82
  -6   8  12    0.06    1.36
  -6   8  11    1.84    1.24
  -6   8  10   -0.34    1.10
  -6   8   9    0.57    0.80
  -6   8   9    3.26    1.24
  -6   8   8    1.68    1.03
  -6   8   8    2.43    0.83
   6  -8  -7    0.67    0.44
  -6   8   7    0.54    0.74
  -6   8   7    0.36    1.04
   6  -8  -6    5.74    0.64
  -6   8   6    6.33    1.26
  -6   8   6    6.68    0.89
   6  -8  -5   64.17    1.84
  -6   8   5   59.98    2.02
  -6   8   5   65.96    2.53
   6  -8  -4   29.39    1.33
  -6   8   4   31.67    1.94
  -6   8   4   27.07    1.38
   6  -8  -3   30.43    1.32
  -6   8   3   31.30    1.76
   6  -8  -2   -0.22    0.39
  -6   8   2   -0.58    0.73
   6  -8  -1    2.08    0.50
   6  -8  -1    1.10    0.33
  -6   8   1    1.05    0.69
   6  -8   0   12.43    1.05
   6  -8   0   13.17    0.83
  -6   8   0   11.68    1.03
   6  -8   1   10.03    0.83
   6  -8   1    8.78    0.83
  -6   8  -1    9.49    0.89
   6  -8   2   -0.27    0.35
   6  -8   2   -0.06    0.42
  -6   8  -2   -0.37    0.59
   6  -8   3    5.27    0.73
   6  -8   3    5.65    0.70
  -6   8  -3    6.49    0.74
   6  -8   4    0.22    0.48
   6  -8   4    1.05    0.55
   6  -8   5   24.84    1.49
   6  -8   5   22.93    1.52
   6  -8   6   -0.79    0.49
   6  -8   6    0.12    0.56
   6  -8   7    0.68    0.57
   6  -8   7   -0.35    0.58
   6  -8   8    3.42    0.91
   6  -8   8    4.18    0.82
   6  -8   9   23.32    1.88
   6  -8   9   26.94    1.72
   6  -8  10    3.84    1.08
   6  -8  10    3.94    0.91
   6  -8  11    6.32    1.30
   6  -8  12   -0.14    0.92
   6  -8  13   -0.06    0.94
   6  -8  14   -0.81    0.93
  -7   8  14    1.53    1.53
  -7   8  13    6.22    1.77
  -7   8  12    3.20    1.42
  -7   8  11   12.68    1.72
  -7   8  10   -0.46    1.10
  -7   8   9    1.53    1.07
  -7   8   8   -1.04    0.71
  -7   8   8   -0.43    0.97
  -7   8   7    5.81    0.93
  -7   8   7    5.00    1.15
   7  -8  -6    0.09    0.39
  -7   8   6   -0.17    0.74
  -7   8   6   -0.11    0.96
   7  -8  -5   51.32    1.69
  -7   8   5   53.86    2.35
  -7   8   5   52.42    2.00
   7  -8  -4   14.08    1.10
  -7   8   4   11.14    0.90
  -7   8   4   13.54    1.35
   7  -8  -3  137.36    3.05
  -7   8   3  132.15    3.55
   7  -8  -2    6.62    0.73
  -7   8   2    8.28    1.09
   7  -8  -1   46.15    1.69
   7  -8  -1   48.99    1.52
  -7   8   1   47.28    1.93
   7  -8   0    9.11    0.84
   7  -8   0   11.10    0.91
  -7   8   0   10.70    1.03
   7  -8   1    4.10    0.67
   7  -8   1    5.03    0.62
  -7   8  -1    3.72    0.77
   7  -8   2    0.67    0.51
   7  -8   2    1.14    0.47
  -7   8  -2    0.73    0.63
   7  -8   3   17.20    1.23
   7  -8   3   18.70    1.33
   7  -8   4    1.88    0.65
   7  -8   4    4.40    0.73
   7  -8   5    1.23    0.63
   7  -8   5    1.97    0.64
   7  -8   6   -0.39    0.56
   7  -8   6   -0.71    0.48
   7  -8   7   10.47    1.24
   7  -8   7   10.07    1.10
   7  -8   8    0.61    0.66
   7  -8   8    0.37    0.71
   7  -8   9    1.33    0.82
   7  -8   9    1.56    0.74
   7  -8  10    0.48    0.72
   7  -8  10    0.27    0.77
   7  -8  11    5.09    1.27
   7  -8  12   -1.27    0.88
   7  -8  13    2.47    1.17
  -8   8  14    1.34    1.58
  -8   8  13    3.14    1.50
  -8   8  12   -0.67    1.31
  -8   8  11    9.49    1.61
  -8   8  10    0.42    1.12
  -8   8   9    9.91    1.48
  -8   8   8    2.82    1.13
  -8   8   7    4.27    0.92
  -8   8   7    6.04    1.22
   8  -8  -6    1.77    0.47
  -8   8   6    1.15    0.77
  -8   8   6    1.56    1.00
   8  -8  -5    3.53    0.58
  -8   8   5    3.61    0.81
  -8   8   5    4.36    1.16
   8  -8  -4    1.71    0.51
  -8   8   4    1.54    1.01
   8  -8  -3   -0.17    0.44
  -8   8   3   -0.65    0.86
   8  -8  -2    2.40    0.57
  -8   8   2    3.42    0.98
   8  -8  -1   30.93    1.46
   8  -8  -1   28.74    1.29
  -8   8   1   26.96    1.67
   8  -8   0   11.37    0.97
   8  -8   0   12.44    1.18
  -8   8   0   12.02    1.11
   8  -8   1   26.37    1.37
   8  -8   1   25.17    1.46
  -8   8  -1   26.18    1.47
   8  -8   2    1.55    0.54
   8  -8   2    1.28    0.58
  -8   8  -2    2.14    0.71
   8  -8   3    3.27    0.70
   8  -8   3    3.89    0.71
  -8   8  -3    3.59    0.73
   8  -8   4    0.66    0.55
   8  -8   4    0.39    0.53
   8  -8   5   10.65    1.13
   8  -8   5    9.19    1.03
   8  -8   6    0.35    0.63
   8  -8   6    0.97    0.66
   8  -8   7    0.79    0.70
   8  -8   7   -0.23    0.60
   8  -8   8    5.66    1.10
   8  -8   8    6.77    1.05
   8  -8   9   27.64    1.86
   8  -8   9   22.87    1.96
   8  -8  10   -0.25    0.78
   8  -8  11    2.01    1.09
   8  -8  12    0.17    0.96
   8  -8  13    1.74    1.13
  -9   8  13    0.30    1.45
  -9   8  12    1.77    1.41
  -9   8  11   10.54    1.61
  -9   8  10    2.43    1.21
  -9   8   9    3.28    1.21
  -9   8   8   -0.27    1.04
  -9   8   7    7.49    1.29
  -9   8   6    2.26    0.81
  -9   8   6    1.27    0.98
   9  -8  -5   22.52    1.22
  -9   8   5   19.25    1.55
  -9   8   5   24.12    1.82
   9  -8  -4    3.01    0.57
  -9   8   4    4.00    1.10
   9  -8  -3    6.85    0.78
  -9   8   3    6.49    1.14
   9  -8  -2    0.54    0.49
  -9   8   2   -0.62    0.85
   9  -8  -1    0.74    0.48
   9  -8  -1    2.25    0.62
  -9   8   1    1.81    0.88
   9  -8   0   12.99    1.22
   9  -8   0    9.65    0.91
  -9   8   0   11.18    1.16
   9  -8   1    3.65    0.74
   9  -8   1    3.16    0.63
  -9   8  -1    4.16    0.87
   9  -8   2    0.98    0.58
   9  -8   2    2.33    0.59
  -9   8  -2    1.64    0.74
   9  -8   3   91.42    2.88
   9  -8   3   95.75    2.88
   9  -8   4    0.69    0.54
   9  -8   4    0.17    0.55
   9  -8   5   19.56    1.57
   9  -8   5   18.51    1.52
   9  -8   6    1.40    0.70
   9  -8   6    1.28    0.73
   9  -8   7   17.99    1.66
   9  -8   7   16.26    1.54
   9  -8   8    0.41    0.71
   9  -8   8   -0.35    0.68
   9  -8   9    2.30    0.95
   9  -8   9    2.21    0.96
   9  -8  10    1.36    0.94
   9  -8  11    6.43    1.37
   9  -8  12    1.46    1.13
 -10   8  13    3.23    1.56
 -10   8  12   -0.22    1.24
 -10   8  10    1.88    1.22
 -10   8   9   28.84    2.14
 -10   8   8    2.83    1.14
 -10   8   7    0.87    1.06
 -10   8   6    4.12    1.18
 -10   8   5    1.83    1.06
  10  -8  -4    0.11    0.46
 -10   8   4   -1.73    0.80
  10  -8  -3    1.11    0.54
 -10   8   3    1.18    0.90
  10  -8  -2    0.72    0.54
 -10   8   2    0.63    0.83
  10  -8  -1    7.39    0.88
  10  -8  -1    6.85    0.81
 -10   8   1    8.85    1.11
  10  -8   0    0.37    0.54
  10  -8   0    1.42    0.54
 -10   8   0    1.30    0.76
  10  -8   1   38.71    1.84
  10  -8   1   39.74    1.77
 -10   8  -1   41.74    1.80
  10  -8   2    3.03    0.71
  10  -8   2    2.77    0.71
 -10   8  -2    2.57    0.75
  10  -8   3    3.26    0.72
  10  -8   3    5.02    0.86
  10  -8   4    8.03    1.02
  10  -8   4    8.83    1.09
  10  -8   5   19.63    1.64
  10  -8   5   22.05    1.66
  10  -8   6    5.00    0.99
  10  -8   6    6.21    1.01
  10  -8   7   -0.14    0.68
  10  -8   7    0.31    0.70
  10  -8   8   -0.09    0.76
  10  -8   8   -0.09    0.78
  10  -8   9    0.48    0.84
  10  -8  10    0.74    0.97
  10  -8  11   -0.73    0.88
 -11   8  12   -1.47    1.20
 -11   8  11    0.26    1.27
 -11   8  10    0.01    1.16
 -11   8   9    7.01    1.46
 -11   8   8    0.17    1.08
 -11   8   7   16.62    1.74
 -11   8   6    0.85    1.08
 -11   8   5    2.56    1.08
  11  -8  -4   -0.36    0.45
 -11   8   4    1.33    0.98
  11  -8  -3   28.85    1.55
 -11   8   3   27.90    1.83
  11  -8  -2    1.85    0.63
 -11   8   2    2.27    0.89
  11  -8  -1    5.16    0.80
  11  -8  -1    5.61    0.85
[truncated: 383,081 more chars]
