# Supplementary material for: Living Polymerization of Propylene with ansa-Dimethylsilylene(fluorenyl)(cumylamido) Titanium Complexes
Source: Polymers (Basel). 2017 Apr 5;9(4):131. doi: 10.3390/polym9040131 (PMC6432314; doi:10.3390/polym9040131)
Supplement: Supplementary file 1 [file polymers-09-00131-s001.zip › 2b-CCDC 1539502.cif]

 
data_dm15342 
  
_audit_creation_method            SHELXL-2013 
_chemical_name_systematic 
; 
 ? 
; 
_chemical_name_common             ? 
_chemical_melting_point           ? 
_chemical_formula_moiety          ? 
_chemical_formula_sum 
 'C38 H49 N Si Ti' 
_chemical_formula_weight          595.77 
  
loop_ 
 _atom_type_symbol 
 _atom_type_description 
 _atom_type_scat_dispersion_real 
 _atom_type_scat_dispersion_imag 
 _atom_type_scat_source 
 'C'  'C'   0.0033   0.0016 
 'International Tables Vol C Tables 4.2.6.8 and 6.1.1.4' 
 'H'  'H'   0.0000   0.0000 
 'International Tables Vol C Tables 4.2.6.8 and 6.1.1.4' 
 'N'  'N'   0.0061   0.0033 
 'International Tables Vol C Tables 4.2.6.8 and 6.1.1.4' 
 'Si'  'Si'   0.0817   0.0704 
 'International Tables Vol C Tables 4.2.6.8 and 6.1.1.4' 
 'Ti'  'Ti'   0.2776   0.4457 
 'International Tables Vol C Tables 4.2.6.8 and 6.1.1.4' 
  
_space_group_crystal_system       triclinic 
_space_group_IT_number            2 
_space_group_name_H-M_alt         'P -1' 
_space_group_name_Hall            '-P 1' 
  
_shelx_space_group_comment 
; 
The symmetry employed for this shelxl refinement is uniquely defined 
by the following loop, which should always be used as a source of 
symmetry information in preference to the above space-group names. 
They are only intended as comments. 
; 
  
loop_ 
 _space_group_symop_operation_xyz 
 'x, y, z' 
 '-x, -y, -z' 
  
_cell_length_a                    10.3445(13) 
_cell_length_b                    11.8424(16) 
_cell_length_c                    15.492(3) 
_cell_angle_alpha                 105.608(4) 
_cell_angle_beta                  99.822(4) 
_cell_angle_gamma                 110.497(3) 
_cell_volume                      1636.8(4) 
_cell_formula_units_Z             2 
_cell_measurement_temperature     133(2) 
_cell_measurement_reflns_used     1412 
_cell_measurement_theta_min       4.486 
_cell_measurement_theta_max       44.622 
  
_exptl_crystal_description        prismatic 
_exptl_crystal_colour             yellow 
_exptl_crystal_density_meas       ?
_exptl_crystal_density_method     ? 
_exptl_crystal_density_diffrn     1.209 
_exptl_crystal_F_000              640 
_exptl_transmission_factor_min    ? 
_exptl_transmission_factor_max    ? 
_exptl_crystal_size_max           0.176 
_exptl_crystal_size_mid           0.134 
_exptl_crystal_size_min           0.089 
_exptl_absorpt_coefficient_mu     0.325 
_shelx_estimated_absorpt_T_min    0.945 
_shelx_estimated_absorpt_T_max    0.972 
_exptl_absorpt_correction_type    multi-scan 
_exptl_absorpt_correction_T_min   0.6369 
_exptl_absorpt_correction_T_max   0.7456 
_exptl_absorpt_process_details    sadabs 
  
_exptl_special_details 
; 
 ? 
; 
  
_diffrn_ambient_temperature       133(2) 
_diffrn_radiation_wavelength      0.71073 
_diffrn_radiation_type            MoK\a 
_diffrn_source                    ? 
_diffrn_measurement_device_type   'Bruker APEX-II CCD' 
_diffrn_measurement_method        '\f and \w scans' 
_diffrn_detector_area_resol_mean  ? 
_diffrn_reflns_number             11599 
_diffrn_reflns_av_unetI/netI      0.0985 
_diffrn_reflns_av_R_equivalents   0.0569 
_diffrn_reflns_limit_h_min        -12 
_diffrn_reflns_limit_h_max        12 
_diffrn_reflns_limit_k_min        -10 
_diffrn_reflns_limit_k_max        14 
_diffrn_reflns_limit_l_min        -18 
_diffrn_reflns_limit_l_max        18 
_diffrn_reflns_theta_min          1.965 
_diffrn_reflns_theta_max          25.499 
_diffrn_reflns_theta_full         25.242 
_diffrn_measured_fraction_theta_max   0.999 
_diffrn_measured_fraction_theta_full  0.999 
_diffrn_reflns_Laue_measured_fraction_max    0.999 
_diffrn_reflns_Laue_measured_fraction_full   0.999 
_diffrn_reflns_point_group_measured_fraction_max   0.999 
_diffrn_reflns_point_group_measured_fraction_full  0.999 
_reflns_number_total              6105 
_reflns_number_gt                 3843 
_reflns_threshold_expression      'I > 2\s(I)' 
_reflns_Friedel_coverage          0.000 
_reflns_Friedel_fraction_max      . 
_reflns_Friedel_fraction_full     . 
  
_reflns_special_details 
; 
 Reflections were merged by SHELXL according to the crystal 
 class for the calculation of statistics and refinement. 
  
 _reflns_Friedel_fraction is defined as the number of unique 
 Friedel pairs measured divided by the number that would be 
 possible theoretically, ignoring centric projections and 
 systematic absences. 
; 
  
_computing_data_collection        'Bruker APEX2' 
_computing_cell_refinement        'Bruker SAINT' 
_computing_data_reduction         'Bruker SAINT' 
_computing_structure_solution     'SHELXS-97 (Sheldrick, 2008)' 
_computing_structure_refinement   'SHELXL-2013 (Sheldrick, 2013)' 
_computing_molecular_graphics     'Bruker SHELXTL' 
_computing_publication_material   'Bruker SHELXTL' 
  
_refine_special_details 
; 
 ? 
; 
_refine_ls_structure_factor_coef  Fsqd 
_refine_ls_matrix_type            full 
_refine_ls_weighting_scheme       calc 
_refine_ls_weighting_details 
'w=1/[\s^2^(Fo^2^)+(0.0533P)^2^] where P=(Fo^2^+2Fc^2^)/3' 
_atom_sites_solution_primary      ? 
_atom_sites_solution_secondary    ? 
_atom_sites_solution_hydrogens    geom 
_refine_ls_hydrogen_treatment     constr 
_refine_ls_extinction_method      none 
_refine_ls_extinction_coef        . 
_refine_ls_number_reflns          6105 
_refine_ls_number_parameters      382 
_refine_ls_number_restraints      0 
_refine_ls_R_factor_all           0.1014 
_refine_ls_R_factor_gt            0.0508 
_refine_ls_wR_factor_ref          0.1249 
_refine_ls_wR_factor_gt           0.1051 
_refine_ls_goodness_of_fit_ref    0.987 
_refine_ls_restrained_S_all       0.987 
_refine_ls_shift/su_max           0.000 
_refine_ls_shift/su_mean          0.000 
  
loop_ 
 _atom_site_label 
 _atom_site_type_symbol 
 _atom_site_fract_x 
 _atom_site_fract_y 
 _atom_site_fract_z 
 _atom_site_U_iso_or_equiv 
 _atom_site_adp_type 
 _atom_site_occupancy 
 _atom_site_site_symmetry_order 
 _atom_site_calc_flag 
 _atom_site_refinement_flags_posn 
 _atom_site_refinement_flags_adp 
 _atom_site_refinement_flags_occupancy 
 _atom_site_disorder_assembly 
 _atom_site_disorder_group 
Ti1 Ti 0.65613(6) 0.69824(6) 0.29655(4) 0.01848(16) Uani 1 1 d . . . . . 
Si1 Si 0.95038(9) 0.83397(9) 0.30812(6) 0.0172(2) Uani 1 1 d . . . . . 
N1 N 0.8039(3) 0.6874(2) 0.23907(17) 0.0163(6) Uani 1 1 d . . . . . 
C1 C 0.6045(3) 0.7706(3) 0.5221(2) 0.0193(7) Uani 1 1 d . . . . . 
H1 H 0.5164 0.7729 0.5303 0.023 Uiso 1 1 calc R U . . . 
C2 C 0.6699(3) 0.7116(3) 0.5677(2) 0.0205(7) Uani 1 1 d . . . . . 
H2 H 0.6257 0.6727 0.6075 0.025 Uiso 1 1 calc R U . . . 
C3 C 0.8020(3) 0.7069(3) 0.5571(2) 0.0180(7) Uani 1 1 d . . . . . 
C4 C 0.8690(3) 0.7664(3) 0.5022(2) 0.0186(7) Uani 1 1 d . . . . . 
H4 H 0.9587 0.7658 0.4965 0.022 Uiso 1 1 calc R U . . . 
C5 C 0.8051(3) 0.8288(3) 0.4540(2) 0.0163(7) Uani 1 1 d . . . . . 
C6 C 0.6699(3) 0.8280(3) 0.4627(2) 0.0171(7) Uani 1 1 d . . . . . 
C7 C 0.6260(3) 0.8901(3) 0.4030(2) 0.0175(7) Uani 1 1 d . . . . . 
C8 C 0.7362(3) 0.9292(3) 0.3589(2) 0.0163(7) Uani 1 1 d . . . . . 
C9 C 0.8477(3) 0.8870(3) 0.3860(2) 0.0176(7) Uani 1 1 d . . . . . 
C10 C 0.7163(3) 0.9893(3) 0.2933(2) 0.0175(7) Uani 1 1 d . . . . . 
H10 H 0.7868 1.0127 0.2617 0.021 Uiso 1 1 calc R U . . . 
C11 C 0.5966(3) 1.0143(3) 0.2747(2) 0.0186(7) Uani 1 1 d . . . . . 
C12 C 0.4917(3) 0.9775(3) 0.3215(2) 0.0207(7) Uani 1 1 d . . . . . 
H12 H 0.4095 0.9957 0.3091 0.025 Uiso 1 1 calc R U . . . 
C13 C 0.5039(3) 0.9171(3) 0.3837(2) 0.0206(7) Uani 1 1 d . . . . . 
H13 H 0.4312 0.8934 0.4138 0.025 Uiso 1 1 calc R U . . . 
C14 C 0.5705(3) 1.0773(3) 0.2030(2) 0.0214(7) Uani 1 1 d . . . . . 
C15 C 0.4343(3) 0.9789(3) 0.1225(2) 0.0280(8) Uani 1 1 d . . . . . 
H15A H 0.3512 0.9564 0.1471 0.042 Uiso 1 1 calc R U . . . 
H15B H 0.4482 0.9010 0.0942 0.042 Uiso 1 1 calc R U . . . 
H15C H 0.4168 1.0165 0.0750 0.042 Uiso 1 1 calc R U . . . 
C16 C 0.6950(3) 1.1173(3) 0.1610(2) 0.0265(8) Uani 1 1 d . . . . . 
H16A H 0.6712 1.1548 0.1148 0.040 Uiso 1 1 calc R U . . . 
H16B H 0.7109 1.0414 0.1304 0.040 Uiso 1 1 calc R U . . . 
H16C H 0.7829 1.1812 0.2109 0.040 Uiso 1 1 calc R U . . . 
C17 C 0.5465(4) 1.1970(3) 0.2491(2) 0.0312(9) Uani 1 1 d . . . . . 
H17A H 0.4614 1.1718 0.2714 0.047 Uiso 1 1 calc R U . . . 
H17B H 0.5313 1.2375 0.2031 0.047 Uiso 1 1 calc R U . . . 
H17C H 0.6315 1.2584 0.3021 0.047 Uiso 1 1 calc R U . . . 
C18 C 0.8637(3) 0.6320(3) 0.6060(2) 0.0197(7) Uani 1 1 d . . . . . 
C19 C 0.8784(4) 0.6811(3) 0.7113(2) 0.0292(8) Uani 1 1 d . . . . . 
H19A H 0.9395 0.7740 0.7386 0.044 Uiso 1 1 calc R U . . . 
H19B H 0.9224 0.6360 0.7425 0.044 Uiso 1 1 calc R U . . . 
H19C H 0.7827 0.6645 0.7199 0.044 Uiso 1 1 calc R U . . . 
C20 C 0.7613(4) 0.4884(3) 0.5614(2) 0.0295(8) Uani 1 1 d . . . . . 
H20A H 0.6653 0.4764 0.5680 0.044 Uiso 1 1 calc R U . . . 
H20B H 0.7984 0.4397 0.5930 0.044 Uiso 1 1 calc R U . . . 
H20C H 0.7547 0.4571 0.4948 0.044 Uiso 1 1 calc R U . . . 
C21 C 1.0134(3) 0.6484(3) 0.5954(2) 0.0260(8) Uani 1 1 d . . . . . 
H21A H 1.0059 0.6150 0.5287 0.039 Uiso 1 1 calc R U . . . 
H21B H 1.0501 0.6007 0.6280 0.039 Uiso 1 1 calc R U . . . 
H21C H 1.0796 0.7401 0.6225 0.039 Uiso 1 1 calc R U . . . 
C22 C 0.8117(3) 0.5789(3) 0.1667(2) 0.0196(7) Uani 1 1 d . . . . . 
C23 C 0.9050(3) 0.6347(3) 0.1086(2) 0.0201(7) Uani 1 1 d . . . . . 
C24 C 1.0332(3) 0.6236(3) 0.1096(2) 0.0246(8) Uani 1 1 d . . . . . 
H24 H 1.0617 0.5793 0.1466 0.030 Uiso 1 1 calc R U . . . 
C25 C 1.1234(4) 0.6736(3) 0.0594(2) 0.0300(8) Uani 1 1 d . . . . . 
H25 H 1.2112 0.6637 0.0630 0.036 Uiso 1 1 calc R U . . . 
C26 C 1.0856(4) 0.7364(3) 0.0052(2) 0.0319(9) Uani 1 1 d . . . . . 
H26 H 1.1464 0.7693 -0.0299 0.038 Uiso 1 1 calc R U . . . 
C27 C 0.9561(4) 0.7532(3) 0.0006(2) 0.0272(8) Uani 1 1 d . . . . . 
C28 C 0.8639(3) 0.7031(3) 0.0525(2) 0.0215(7) Uani 1 1 d . . . . . 
C29 C 0.7395(3) 0.7289(3) 0.0483(2) 0.0251(8) Uani 1 1 d . . . . . 
H29 H 0.6778 0.7001 0.0841 0.030 Uiso 1 1 calc R U . . . 
C30 C 0.7064(4) 0.7942(4) -0.0060(2) 0.0333(9) Uani 1 1 d . . . . . 
H30 H 0.6206 0.8075 -0.0092 0.040 Uiso 1 1 calc R U . . . 
C31 C 0.7975(4) 0.8418(4) -0.0568(3) 0.0386(10) Uani 1 1 d . . . . . 
H31 H 0.7740 0.8876 -0.0942 0.046 Uiso 1 1 calc R U . . . 
C32 C 0.9194(4) 0.8226(4) -0.0529(2) 0.0341(9) Uani 1 1 d . . . . . 
H32 H 0.9816 0.8567 -0.0868 0.041 Uiso 1 1 calc R U . . . 
C33 C 0.6624(3) 0.4776(3) 0.1032(2) 0.0238(8) Uani 1 1 d . . . . . 
H33A H 0.6040 0.4436 0.1415 0.036 Uiso 1 1 calc R U . . . 
H33B H 0.6728 0.4070 0.0589 0.036 Uiso 1 1 calc R U . . . 
H33C H 0.6148 0.5173 0.0685 0.036 Uiso 1 1 calc R U . . . 
C34 C 0.8755(4) 0.5077(3) 0.2190(2) 0.0266(8) Uani 1 1 d . . . . . 
H34A H 0.9715 0.5680 0.2619 0.040 Uiso 1 1 calc R U . . . 
H34B H 0.8834 0.4366 0.1736 0.040 Uiso 1 1 calc R U . . . 
H34C H 0.8122 0.4734 0.2548 0.040 Uiso 1 1 calc R U . . . 
C35 C 0.4737(3) 0.6673(3) 0.1932(2) 0.0287(8) Uani 1 1 d . . . . . 
H35A H 0.4968 0.7389 0.1698 0.043 Uiso 1 1 calc R U . . . 
H35B H 0.3939 0.6624 0.2204 0.043 Uiso 1 1 calc R U . . . 
H35C H 0.4454 0.5863 0.1414 0.043 Uiso 1 1 calc R U . . . 
C36 C 0.5705(4) 0.5300(3) 0.3268(2) 0.0310(8) Uani 1 1 d . . . . . 
H36A H 0.4730 0.4749 0.2840 0.046 Uiso 1 1 calc R U . . . 
H36B H 0.5662 0.5528 0.3916 0.046 Uiso 1 1 calc R U . . . 
H36C H 0.6321 0.4835 0.3190 0.046 Uiso 1 1 calc R U . . . 
C37 C 1.1104(3) 0.8189(3) 0.3712(2) 0.0247(8) Uani 1 1 d . . . . . 
H37A H 1.0784 0.7521 0.3986 0.037 Uiso 1 1 calc R U . . . 
H37B H 1.1748 0.9016 0.4211 0.037 Uiso 1 1 calc R U . . . 
H37C H 1.1620 0.7951 0.3270 0.037 Uiso 1 1 calc R U . . . 
C38 C 1.0247(3) 0.9479(3) 0.2482(2) 0.0243(8) Uani 1 1 d . . . . . 
H38A H 1.0846 0.9192 0.2129 0.036 Uiso 1 1 calc R U . . . 
H38B H 1.0836 1.0345 0.2950 0.036 Uiso 1 1 calc R U . . . 
H38C H 0.9451 0.9499 0.2051 0.036 Uiso 1 1 calc R U . . . 
  
loop_ 
 _atom_site_aniso_label 
 _atom_site_aniso_U_11 
 _atom_site_aniso_U_22 
 _atom_site_aniso_U_33 
 _atom_site_aniso_U_23 
 _atom_site_aniso_U_13 
 _atom_site_aniso_U_12 
Ti1 0.0168(3) 0.0187(3) 0.0190(3) 0.0057(3) 0.0066(3) 0.0065(3) 
Si1 0.0147(4) 0.0177(5) 0.0189(5) 0.0062(4) 0.0067(4) 0.0059(4) 
N1 0.0185(14) 0.0167(15) 0.0164(14) 0.0063(12) 0.0087(11) 0.0084(12) 
C1 0.0148(16) 0.0201(18) 0.0183(17) 0.0036(14) 0.0060(14) 0.0041(14) 
C2 0.0227(17) 0.0223(19) 0.0174(17) 0.0089(15) 0.0100(14) 0.0072(15) 
C3 0.0207(17) 0.0141(17) 0.0156(16) 0.0024(14) 0.0050(14) 0.0054(14) 
C4 0.0155(16) 0.0168(18) 0.0210(17) 0.0045(14) 0.0040(14) 0.0061(14) 
C5 0.0172(16) 0.0157(17) 0.0119(16) 0.0010(13) 0.0041(13) 0.0052(14) 
C6 0.0171(16) 0.0140(17) 0.0167(17) 0.0023(14) 0.0039(13) 0.0054(14) 
C7 0.0193(16) 0.0145(17) 0.0167(17) 0.0041(14) 0.0046(14) 0.0062(14) 
C8 0.0173(16) 0.0156(17) 0.0160(16) 0.0050(14) 0.0061(13) 0.0067(14) 
C9 0.0178(16) 0.0169(18) 0.0167(16) 0.0048(14) 0.0039(14) 0.0072(14) 
C10 0.0187(16) 0.0133(17) 0.0182(17) 0.0051(14) 0.0069(14) 0.0038(14) 
C11 0.0215(17) 0.0136(17) 0.0178(17) 0.0038(14) 0.0040(14) 0.0064(14) 
C12 0.0193(17) 0.0239(19) 0.0209(18) 0.0066(15) 0.0052(14) 0.0126(15) 
C13 0.0192(17) 0.0248(19) 0.0213(18) 0.0086(15) 0.0101(14) 0.0108(15) 
C14 0.0222(17) 0.0202(19) 0.0233(18) 0.0096(15) 0.0059(15) 0.0095(15) 
C15 0.0280(19) 0.027(2) 0.0257(19) 0.0118(16) 0.0001(16) 0.0102(16) 
C16 0.0279(19) 0.028(2) 0.0262(19) 0.0166(16) 0.0076(16) 0.0101(16) 
C17 0.040(2) 0.026(2) 0.032(2) 0.0135(17) 0.0097(18) 0.0163(18) 
C18 0.0226(17) 0.0163(18) 0.0214(17) 0.0084(14) 0.0048(14) 0.0088(15) 
C19 0.033(2) 0.036(2) 0.0251(19) 0.0155(17) 0.0083(16) 0.0179(18) 
C20 0.0287(19) 0.021(2) 0.037(2) 0.0118(17) 0.0068(17) 0.0093(16) 
C21 0.0264(18) 0.027(2) 0.029(2) 0.0139(17) 0.0051(16) 0.0154(16) 
C22 0.0205(17) 0.0209(19) 0.0188(17) 0.0071(15) 0.0085(14) 0.0087(15) 
C23 0.0217(17) 0.0161(18) 0.0173(17) 0.0002(14) 0.0061(14) 0.0061(15) 
C24 0.0261(19) 0.024(2) 0.0208(18) 0.0034(15) 0.0082(15) 0.0096(16) 
C25 0.0204(18) 0.031(2) 0.029(2) 0.0006(17) 0.0113(16) 0.0055(16) 
C26 0.030(2) 0.028(2) 0.024(2) -0.0002(17) 0.0152(16) 0.0023(17) 
C27 0.032(2) 0.022(2) 0.0203(18) 0.0024(15) 0.0102(16) 0.0045(16) 
C28 0.0217(17) 0.0178(18) 0.0166(17) 0.0008(14) 0.0034(14) 0.0040(15) 
C29 0.0258(18) 0.026(2) 0.0213(18) 0.0081(16) 0.0067(15) 0.0090(16) 
C30 0.035(2) 0.035(2) 0.027(2) 0.0120(18) 0.0009(17) 0.0145(18) 
C31 0.047(2) 0.042(3) 0.028(2) 0.0209(19) 0.0062(19) 0.015(2) 
C32 0.042(2) 0.034(2) 0.0188(19) 0.0116(17) 0.0100(17) 0.0061(19) 
C33 0.0248(18) 0.0218(19) 0.0197(18) 0.0029(15) 0.0084(15) 0.0064(15) 
C34 0.0316(19) 0.0204(19) 0.033(2) 0.0119(16) 0.0114(16) 0.0136(16) 
C35 0.0191(17) 0.027(2) 0.032(2) 0.0050(17) 0.0021(16) 0.0078(16) 
C36 0.034(2) 0.020(2) 0.033(2) 0.0049(17) 0.0145(17) 0.0052(17) 
C37 0.0200(17) 0.024(2) 0.0237(18) 0.0008(15) 0.0055(15) 0.0080(15) 
C38 0.0260(18) 0.0212(19) 0.0247(19) 0.0072(15) 0.0132(15) 0.0068(15) 
  
_geom_special_details 
; 
 All esds (except the esd in the dihedral angle between two l.s. planes) 
 are estimated using the full covariance matrix.  The cell esds are taken 
 into account individually in the estimation of esds in distances, angles 
 and torsion angles; correlations between esds in cell parameters are only 
 used when they are defined by crystal symmetry.  An approximate (isotropic) 
 treatment of cell esds is used for estimating esds involving l.s. planes. 
; 
  
loop_ 
 _geom_bond_atom_site_label_1 
 _geom_bond_atom_site_label_2 
 _geom_bond_distance 
 _geom_bond_site_symmetry_2 
 _geom_bond_publ_flag 
Ti1 N1 1.920(2) . ? 
Ti1 C36 2.094(3) . ? 
Ti1 C35 2.104(3) . ? 
Ti1 C9 2.267(3) . ? 
Ti1 C5 2.394(3) . ? 
Ti1 C8 2.413(3) . ? 
Ti1 C6 2.569(3) . ? 
Ti1 C7 2.576(3) . ? 
Ti1 Si1 2.8484(11) . ? 
Si1 N1 1.749(3) . ? 
Si1 C38 1.861(3) . ? 
Si1 C37 1.864(3) . ? 
Si1 C9 1.864(3) . ? 
N1 C22 1.497(4) . ? 
C1 C2 1.371(4) . ? 
C1 C6 1.411(4) . ? 
C1 H1 0.9500 . ? 
C2 C3 1.422(4) . ? 
C2 H2 0.9500 . ? 
C3 C4 1.372(4) . ? 
C3 C18 1.538(4) . ? 
C4 C5 1.418(4) . ? 
C4 H4 0.9500 . ? 
C5 C6 1.425(4) . ? 
C5 C9 1.454(4) . ? 
C6 C7 1.435(4) . ? 
C7 C13 1.411(4) . ? 
C7 C8 1.431(4) . ? 
C8 C10 1.414(4) . ? 
C8 C9 1.453(4) . ? 
C10 C11 1.372(4) . ? 
C10 H10 0.9500 . ? 
C11 C12 1.416(4) . ? 
C11 C14 1.532(4) . ? 
C12 C13 1.360(4) . ? 
C12 H12 0.9500 . ? 
C13 H13 0.9500 . ? 
C14 C16 1.527(4) . ? 
C14 C17 1.530(4) . ? 
C14 C15 1.538(4) . ? 
C15 H15A 0.9800 . ? 
C15 H15B 0.9800 . ? 
C15 H15C 0.9800 . ? 
C16 H16A 0.9800 . ? 
C16 H16B 0.9800 . ? 
C16 H16C 0.9800 . ? 
C17 H17A 0.9800 . ? 
C17 H17B 0.9800 . ? 
C17 H17C 0.9800 . ? 
C18 C20 1.533(4) . ? 
C18 C21 1.535(4) . ? 
C18 C19 1.538(4) . ? 
C19 H19A 0.9800 . ? 
C19 H19B 0.9800 . ? 
C19 H19C 0.9800 . ? 
C20 H20A 0.9800 . ? 
C20 H20B 0.9800 . ? 
C20 H20C 0.9800 . ? 
C21 H21A 0.9800 . ? 
C21 H21B 0.9800 . ? 
C21 H21C 0.9800 . ? 
C22 C33 1.530(4) . ? 
C22 C23 1.532(4) . ? 
C22 C34 1.542(4) . ? 
C23 C24 1.375(4) . ? 
C23 C28 1.445(4) . ? 
C24 C25 1.392(4) . ? 
C24 H24 0.9500 . ? 
C25 C26 1.356(5) . ? 
C25 H25 0.9500 . ? 
C26 C27 1.415(5) . ? 
C26 H26 0.9500 . ? 
C27 C32 1.408(5) . ? 
C27 C28 1.425(4) . ? 
C28 C29 1.419(4) . ? 
C29 C30 1.364(4) . ? 
C29 H29 0.9500 . ? 
C30 C31 1.395(5) . ? 
C30 H30 0.9500 . ? 
C31 C32 1.351(5) . ? 
C31 H31 0.9500 . ? 
C32 H32 0.9500 . ? 
C33 H33A 0.9800 . ? 
C33 H33B 0.9800 . ? 
C33 H33C 0.9800 . ? 
C34 H34A 0.9800 . ? 
C34 H34B 0.9800 . ? 
C34 H34C 0.9800 . ? 
C35 H35A 0.9800 . ? 
C35 H35B 0.9800 . ? 
C35 H35C 0.9800 . ? 
C36 H36A 0.9800 . ? 
C36 H36B 0.9800 . ? 
C36 H36C 0.9800 . ? 
C37 H37A 0.9800 . ? 
C37 H37B 0.9800 . ? 
C37 H37C 0.9800 . ? 
C38 H38A 0.9800 . ? 
C38 H38B 0.9800 . ? 
C38 H38C 0.9800 . ? 
  
loop_ 
 _geom_angle_atom_site_label_1 
 _geom_angle_atom_site_label_2 
 _geom_angle_atom_site_label_3 
 _geom_angle 
 _geom_angle_site_symmetry_1 
 _geom_angle_site_symmetry_3 
 _geom_angle_publ_flag 
N1 Ti1 C36 107.48(12) . . ? 
N1 Ti1 C35 108.97(12) . . ? 
C36 Ti1 C35 98.90(14) . . ? 
N1 Ti1 C9 77.74(11) . . ? 
C36 Ti1 C9 128.78(13) . . ? 
C35 Ti1 C9 128.34(12) . . ? 
N1 Ti1 C5 99.01(10) . . ? 
C36 Ti1 C5 94.47(12) . . ? 
C35 Ti1 C5 143.44(12) . . ? 
C9 Ti1 C5 36.23(10) . . ? 
N1 Ti1 C8 100.07(10) . . ? 
C36 Ti1 C8 143.36(12) . . ? 
C35 Ti1 C8 94.36(12) . . ? 
C9 Ti1 C8 36.00(10) . . ? 
C5 Ti1 C8 57.06(10) . . ? 
N1 Ti1 C6 131.69(10) . . ? 
C36 Ti1 C6 88.31(12) . . ? 
C35 Ti1 C6 113.26(11) . . ? 
C9 Ti1 C6 58.07(10) . . ? 
C5 Ti1 C6 33.14(9) . . ? 
C8 Ti1 C6 55.13(10) . . ? 
N1 Ti1 C7 132.53(11) . . ? 
C36 Ti1 C7 113.14(12) . . ? 
C35 Ti1 C7 88.27(12) . . ? 
C9 Ti1 C7 58.04(10) . . ? 
C5 Ti1 C7 55.23(9) . . ? 
C8 Ti1 C7 33.13(9) . . ? 
C6 Ti1 C7 32.39(9) . . ? 
N1 Ti1 Si1 36.96(8) . . ? 
C36 Ti1 Si1 126.13(10) . . ? 
C35 Ti1 Si1 126.54(10) . . ? 
C9 Ti1 Si1 40.78(8) . . ? 
C5 Ti1 Si1 67.09(7) . . ? 
C8 Ti1 Si1 67.48(7) . . ? 
C6 Ti1 Si1 96.92(7) . . ? 
C7 Ti1 Si1 97.17(7) . . ? 
N1 Si1 C38 116.96(14) . . ? 
N1 Si1 C37 114.91(13) . . ? 
C38 Si1 C37 104.57(15) . . ? 
N1 Si1 C9 93.88(13) . . ? 
C38 Si1 C9 113.17(14) . . ? 
C37 Si1 C9 113.63(14) . . ? 
N1 Si1 Ti1 41.29(8) . . ? 
C38 Si1 Ti1 128.05(10) . . ? 
C37 Si1 Ti1 127.25(11) . . ? 
C9 Si1 Ti1 52.60(10) . . ? 
C22 N1 Si1 125.09(19) . . ? 
C22 N1 Ti1 132.3(2) . . ? 
Si1 N1 Ti1 101.76(12) . . ? 
C2 C1 C6 119.1(3) . . ? 
C2 C1 H1 120.5 . . ? 
C6 C1 H1 120.5 . . ? 
C1 C2 C3 121.8(3) . . ? 
C1 C2 H2 119.1 . . ? 
C3 C2 H2 119.1 . . ? 
C4 C3 C2 119.5(3) . . ? 
C4 C3 C18 121.8(3) . . ? 
C2 C3 C18 118.7(3) . . ? 
C3 C4 C5 120.4(3) . . ? 
C3 C4 H4 119.8 . . ? 
C5 C4 H4 119.8 . . ? 
C4 C5 C6 119.1(3) . . ? 
C4 C5 C9 130.4(3) . . ? 
C6 C5 C9 110.2(3) . . ? 
C4 C5 Ti1 115.1(2) . . ? 
C6 C5 Ti1 80.18(17) . . ? 
C9 C5 Ti1 67.10(16) . . ? 
C1 C6 C5 120.0(3) . . ? 
C1 C6 C7 132.3(3) . . ? 
C5 C6 C7 107.7(3) . . ? 
C1 C6 Ti1 123.3(2) . . ? 
C5 C6 Ti1 66.68(16) . . ? 
C7 C6 Ti1 74.07(17) . . ? 
C13 C7 C8 119.8(3) . . ? 
C13 C7 C6 132.8(3) . . ? 
C8 C7 C6 107.4(2) . . ? 
C13 C7 Ti1 124.3(2) . . ? 
C8 C7 Ti1 67.15(16) . . ? 
C6 C7 Ti1 73.54(17) . . ? 
C10 C8 C7 118.7(3) . . ? 
C10 C8 C9 130.9(3) . . ? 
C7 C8 C9 110.2(2) . . ? 
C10 C8 Ti1 116.6(2) . . ? 
C7 C8 Ti1 79.72(18) . . ? 
C9 C8 Ti1 66.52(16) . . ? 
C8 C9 C5 104.3(2) . . ? 
C8 C9 Si1 124.7(2) . . ? 
C5 C9 Si1 122.9(2) . . ? 
C8 C9 Ti1 77.48(17) . . ? 
C5 C9 Ti1 76.67(17) . . ? 
Si1 C9 Ti1 86.62(12) . . ? 
C11 C10 C8 121.0(3) . . ? 
C11 C10 H10 119.5 . . ? 
C8 C10 H10 119.5 . . ? 
C10 C11 C12 118.8(3) . . ? 
C10 C11 C14 122.4(3) . . ? 
C12 C11 C14 118.7(3) . . ? 
C13 C12 C11 122.6(3) . . ? 
C13 C12 H12 118.7 . . ? 
C11 C12 H12 118.7 . . ? 
C12 C13 C7 119.1(3) . . ? 
C12 C13 H13 120.5 . . ? 
C7 C13 H13 120.5 . . ? 
C16 C14 C17 108.4(3) . . ? 
C16 C14 C11 113.2(2) . . ? 
C17 C14 C11 109.9(3) . . ? 
C16 C14 C15 107.9(3) . . ? 
C17 C14 C15 109.3(3) . . ? 
C11 C14 C15 108.0(3) . . ? 
C14 C15 H15A 109.5 . . ? 
C14 C15 H15B 109.5 . . ? 
H15A C15 H15B 109.5 . . ? 
C14 C15 H15C 109.5 . . ? 
H15A C15 H15C 109.5 . . ? 
H15B C15 H15C 109.5 . . ? 
C14 C16 H16A 109.5 . . ? 
C14 C16 H16B 109.5 . . ? 
H16A C16 H16B 109.5 . . ? 
C14 C16 H16C 109.5 . . ? 
H16A C16 H16C 109.5 . . ? 
H16B C16 H16C 109.5 . . ? 
C14 C17 H17A 109.5 . . ? 
C14 C17 H17B 109.5 . . ? 
H17A C17 H17B 109.5 . . ? 
C14 C17 H17C 109.5 . . ? 
H17A C17 H17C 109.5 . . ? 
H17B C17 H17C 109.5 . . ? 
C20 C18 C21 108.6(3) . . ? 
C20 C18 C3 108.7(3) . . ? 
C21 C18 C3 111.6(3) . . ? 
C20 C18 C19 109.9(3) . . ? 
C21 C18 C19 108.1(3) . . ? 
C3 C18 C19 110.0(2) . . ? 
C18 C19 H19A 109.5 . . ? 
C18 C19 H19B 109.5 . . ? 
H19A C19 H19B 109.5 . . ? 
C18 C19 H19C 109.5 . . ? 
H19A C19 H19C 109.5 . . ? 
H19B C19 H19C 109.5 . . ? 
C18 C20 H20A 109.5 . . ? 
C18 C20 H20B 109.5 . . ? 
H20A C20 H20B 109.5 . . ? 
C18 C20 H20C 109.5 . . ? 
H20A C20 H20C 109.5 . . ? 
H20B C20 H20C 109.5 . . ? 
C18 C21 H21A 109.5 . . ? 
C18 C21 H21B 109.5 . . ? 
H21A C21 H21B 109.5 . . ? 
C18 C21 H21C 109.5 . . ? 
H21A C21 H21C 109.5 . . ? 
H21B C21 H21C 109.5 . . ? 
N1 C22 C33 112.5(2) . . ? 
N1 C22 C23 108.8(2) . . ? 
C33 C22 C23 110.6(3) . . ? 
N1 C22 C34 107.4(2) . . ? 
C33 C22 C34 105.3(3) . . ? 
C23 C22 C34 112.3(2) . . ? 
C24 C23 C28 117.4(3) . . ? 
C24 C23 C22 121.0(3) . . ? 
C28 C23 C22 121.6(3) . . ? 
C23 C24 C25 123.6(3) . . ? 
C23 C24 H24 118.2 . . ? 
C25 C24 H24 118.2 . . ? 
C26 C25 C24 119.8(3) . . ? 
C26 C25 H25 120.1 . . ? 
C24 C25 H25 120.1 . . ? 
C25 C26 C27 120.4(3) . . ? 
C25 C26 H26 119.8 . . ? 
C27 C26 H26 119.8 . . ? 
C32 C27 C26 120.5(3) . . ? 
C32 C27 C28 119.6(3) . . ? 
C26 C27 C28 119.9(3) . . ? 
C29 C28 C27 117.0(3) . . ? 
C29 C28 C23 124.2(3) . . ? 
C27 C28 C23 118.8(3) . . ? 
C30 C29 C28 121.5(3) . . ? 
C30 C29 H29 119.3 . . ? 
C28 C29 H29 119.3 . . ? 
C29 C30 C31 120.6(3) . . ? 
C29 C30 H30 119.7 . . ? 
C31 C30 H30 119.7 . . ? 
C32 C31 C30 119.9(3) . . ? 
C32 C31 H31 120.0 . . ? 
C30 C31 H31 120.0 . . ? 
C31 C32 C27 121.4(3) . . ? 
C31 C32 H32 119.3 . . ? 
C27 C32 H32 119.3 . . ? 
C22 C33 H33A 109.5 . . ? 
C22 C33 H33B 109.5 . . ? 
H33A C33 H33B 109.5 . . ? 
C22 C33 H33C 109.5 . . ? 
H33A C33 H33C 109.5 . . ? 
H33B C33 H33C 109.5 . . ? 
C22 C34 H34A 109.5 . . ? 
C22 C34 H34B 109.5 . . ? 
H34A C34 H34B 109.5 . . ? 
C22 C34 H34C 109.5 . . ? 
H34A C34 H34C 109.5 . . ? 
H34B C34 H34C 109.5 . . ? 
Ti1 C35 H35A 109.5 . . ? 
Ti1 C35 H35B 109.5 . . ? 
H35A C35 H35B 109.5 . . ? 
Ti1 C35 H35C 109.5 . . ? 
H35A C35 H35C 109.5 . . ? 
H35B C35 H35C 109.5 . . ? 
Ti1 C36 H36A 109.5 . . ? 
Ti1 C36 H36B 109.5 . . ? 
H36A C36 H36B 109.5 . . ? 
Ti1 C36 H36C 109.5 . . ? 
H36A C36 H36C 109.5 . . ? 
H36B C36 H36C 109.5 . . ? 
Si1 C37 H37A 109.5 . . ? 
Si1 C37 H37B 109.5 . . ? 
H37A C37 H37B 109.5 . . ? 
Si1 C37 H37C 109.5 . . ? 
H37A C37 H37C 109.5 . . ? 
H37B C37 H37C 109.5 . . ? 
Si1 C38 H38A 109.5 . . ? 
Si1 C38 H38B 109.5 . . ? 
H38A C38 H38B 109.5 . . ? 
Si1 C38 H38C 109.5 . . ? 
H38A C38 H38C 109.5 . . ? 
H38B C38 H38C 109.5 . . ? 
  
loop_ 
 _geom_torsion_atom_site_label_1 
 _geom_torsion_atom_site_label_2 
 _geom_torsion_atom_site_label_3 
 _geom_torsion_atom_site_label_4 
 _geom_torsion 
 _geom_torsion_site_symmetry_1 
 _geom_torsion_site_symmetry_2 
 _geom_torsion_site_symmetry_3 
 _geom_torsion_site_symmetry_4 
 _geom_torsion_publ_flag 
C38 Si1 N1 C22 71.4(3) . . . . ? 
C37 Si1 N1 C22 -51.8(3) . . . . ? 
C9 Si1 N1 C22 -170.2(2) . . . . ? 
Ti1 Si1 N1 C22 -170.7(3) . . . . ? 
C38 Si1 N1 Ti1 -117.96(14) . . . . ? 
C37 Si1 N1 Ti1 118.85(14) . . . . ? 
C9 Si1 N1 Ti1 0.53(13) . . . . ? 
C6 C1 C2 C3 0.2(5) . . . . ? 
C1 C2 C3 C4 2.1(5) . . . . ? 
C1 C2 C3 C18 -176.4(3) . . . . ? 
C2 C3 C4 C5 -1.9(5) . . . . ? 
C18 C3 C4 C5 176.5(3) . . . . ? 
C3 C4 C5 C6 -0.5(5) . . . . ? 
C3 C4 C5 C9 -173.6(3) . . . . ? 
C3 C4 C5 Ti1 -93.1(3) . . . . ? 
C2 C1 C6 C5 -2.7(4) . . . . ? 
C2 C1 C6 C7 176.5(3) . . . . ? 
C2 C1 C6 Ti1 77.7(3) . . . . ? 
C4 C5 C6 C1 2.8(4) . . . . ? 
C9 C5 C6 C1 177.2(3) . . . . ? 
Ti1 C5 C6 C1 116.2(3) . . . . ? 
C4 C5 C6 C7 -176.6(3) . . . . ? 
C9 C5 C6 C7 -2.2(4) . . . . ? 
Ti1 C5 C6 C7 -63.2(2) . . . . ? 
C4 C5 C6 Ti1 -113.4(3) . . . . ? 
C9 C5 C6 Ti1 61.0(2) . . . . ? 
C1 C6 C7 C13 0.9(6) . . . . ? 
C5 C6 C7 C13 -179.8(3) . . . . ? 
Ti1 C6 C7 C13 121.8(4) . . . . ? 
C1 C6 C7 C8 -179.7(3) . . . . ? 
C5 C6 C7 C8 -0.4(3) . . . . ? 
Ti1 C6 C7 C8 -58.9(2) . . . . ? 
C1 C6 C7 Ti1 -120.8(4) . . . . ? 
C5 C6 C7 Ti1 58.5(2) . . . . ? 
C13 C7 C8 C10 -2.8(4) . . . . ? 
C6 C7 C8 C10 177.7(3) . . . . ? 
Ti1 C7 C8 C10 114.7(3) . . . . ? 
C13 C7 C8 C9 -177.7(3) . . . . ? 
C6 C7 C8 C9 2.9(3) . . . . ? 
Ti1 C7 C8 C9 -60.1(2) . . . . ? 
C13 C7 C8 Ti1 -117.6(3) . . . . ? 
C6 C7 C8 Ti1 63.0(2) . . . . ? 
C10 C8 C9 C5 -178.1(3) . . . . ? 
C7 C8 C9 C5 -4.0(3) . . . . ? 
Ti1 C8 C9 C5 -72.5(2) . . . . ? 
C10 C8 C9 Si1 -28.7(5) . . . . ? 
C7 C8 C9 Si1 145.3(2) . . . . ? 
Ti1 C8 C9 Si1 76.9(2) . . . . ? 
C10 C8 C9 Ti1 -105.6(3) . . . . ? 
C7 C8 C9 Ti1 68.5(2) . . . . ? 
C4 C5 C9 C8 177.4(3) . . . . ? 
C6 C5 C9 C8 3.8(3) . . . . ? 
Ti1 C5 C9 C8 73.1(2) . . . . ? 
C4 C5 C9 Si1 27.3(5) . . . . ? 
C6 C5 C9 Si1 -146.3(2) . . . . ? 
Ti1 C5 C9 Si1 -77.0(2) . . . . ? 
C4 C5 C9 Ti1 104.3(3) . . . . ? 
C6 C5 C9 Ti1 -69.3(2) . . . . ? 
N1 Si1 C9 C8 -72.7(3) . . . . ? 
C38 Si1 C9 C8 48.9(3) . . . . ? 
C37 Si1 C9 C8 168.0(2) . . . . ? 
Ti1 Si1 C9 C8 -72.2(2) . . . . ? 
N1 Si1 C9 C5 71.3(3) . . . . ? 
C38 Si1 C9 C5 -167.2(2) . . . . ? 
C37 Si1 C9 C5 -48.1(3) . . . . ? 
Ti1 Si1 C9 C5 71.7(2) . . . . ? 
N1 Si1 C9 Ti1 -0.44(11) . . . . ? 
C38 Si1 C9 Ti1 121.11(13) . . . . ? 
C37 Si1 C9 Ti1 -119.81(13) . . . . ? 
C7 C8 C10 C11 2.4(5) . . . . ? 
C9 C8 C10 C11 176.1(3) . . . . ? 
Ti1 C8 C10 C11 95.1(3) . . . . ? 
C8 C10 C11 C12 -0.7(5) . . . . ? 
C8 C10 C11 C14 -179.1(3) . . . . ? 
C10 C11 C12 C13 -0.7(5) . . . . ? 
C14 C11 C12 C13 177.7(3) . . . . ? 
C11 C12 C13 C7 0.3(5) . . . . ? 
C8 C7 C13 C12 1.5(5) . . . . ? 
C6 C7 C13 C12 -179.2(3) . . . . ? 
Ti1 C7 C13 C12 -79.8(4) . . . . ? 
C10 C11 C14 C16 -4.1(4) . . . . ? 
C12 C11 C14 C16 177.5(3) . . . . ? 
C10 C11 C14 C17 -125.5(3) . . . . ? 
C12 C11 C14 C17 56.1(4) . . . . ? 
C10 C11 C14 C15 115.3(3) . . . . ? 
C12 C11 C14 C15 -63.1(4) . . . . ? 
C4 C3 C18 C20 -112.4(3) . . . . ? 
C2 C3 C18 C20 66.0(4) . . . . ? 
C4 C3 C18 C21 7.3(4) . . . . ? 
C2 C3 C18 C21 -174.3(3) . . . . ? 
C4 C3 C18 C19 127.2(3) . . . . ? 
C2 C3 C18 C19 -54.3(4) . . . . ? 
Si1 N1 C22 C33 -166.9(2) . . . . ? 
Ti1 N1 C22 C33 25.4(4) . . . . ? 
Si1 N1 C22 C23 -44.0(3) . . . . ? 
Ti1 N1 C22 C23 148.4(2) . . . . ? 
Si1 N1 C22 C34 77.7(3) . . . . ? 
Ti1 N1 C22 C34 -89.9(3) . . . . ? 
N1 C22 C23 C24 116.1(3) . . . . ? 
C33 C22 C23 C24 -119.8(3) . . . . ? 
C34 C22 C23 C24 -2.6(4) . . . . ? 
N1 C22 C23 C28 -62.5(4) . . . . ? 
C33 C22 C23 C28 61.5(4) . . . . ? 
C34 C22 C23 C28 178.8(3) . . . . ? 
C28 C23 C24 C25 -0.4(5) . . . . ? 
C22 C23 C24 C25 -179.2(3) . . . . ? 
C23 C24 C25 C26 -0.5(5) . . . . ? 
C24 C25 C26 C27 1.0(5) . . . . ? 
C25 C26 C27 C32 177.6(3) . . . . ? 
C25 C26 C27 C28 -0.5(5) . . . . ? 
C32 C27 C28 C29 -1.2(5) . . . . ? 
C26 C27 C28 C29 177.0(3) . . . . ? 
C32 C27 C28 C23 -178.6(3) . . . . ? 
C26 C27 C28 C23 -0.4(5) . . . . ? 
C24 C23 C28 C29 -176.3(3) . . . . ? 
C22 C23 C28 C29 2.4(5) . . . . ? 
C24 C23 C28 C27 0.9(4) . . . . ? 
C22 C23 C28 C27 179.6(3) . . . . ? 
C27 C28 C29 C30 2.6(5) . . . . ? 
C23 C28 C29 C30 179.9(3) . . . . ? 
C28 C29 C30 C31 -2.3(5) . . . . ? 
C29 C30 C31 C32 0.4(6) . . . . ? 
C30 C31 C32 C27 1.1(6) . . . . ? 
C26 C27 C32 C31 -178.8(3) . . . . ? 
C28 C27 C32 C31 -0.7(5) . . . . ? 
  
_refine_diff_density_max    0.386 
_refine_diff_density_min   -0.344 
_refine_diff_density_rms    0.065 
  
_shelxl_version_number 2013-4 
  
_shelx_res_file 
; 
TITL dm15342 in P-1 
CELL 0.71073  10.3445  11.8424  15.4924 105.608  99.822 110.497 
ZERR    2.00   0.0013   0.0016   0.0029   0.004   0.004   0.003 
LATT 1 
SFAC C  H  N  Si Ti 
UNIT 76 98 2 2 2 
OMIT    0   0   1 
OMIT    -3  -1   4 
OMIT  -3.00  51.00 
L.S. 10 
ACTA 
BOND $H 
FMAP 2 
PLAN 20 
size 0.176 0.134 0.089 
wpdb -1 
mpla c23 > c32 
mpla c1 > c13 
mpla 5 c5 > c9 Ti1 
htab 
conf 
TEMP -140 
WGHT    0.053300 
FVAR       0.14846 
MOLE 1 
TI1   5    0.656129    0.698243    0.296548    11.00000    0.01683    0.01867 = 
         0.01899    0.00574    0.00655    0.00646 
SI1   4    0.950379    0.833971    0.308117    11.00000    0.01470    0.01767 = 
         0.01886    0.00616    0.00672    0.00592 
N1    3    0.803863    0.687398    0.239067    11.00000    0.01848    0.01669 = 
         0.01636    0.00625    0.00871    0.00837 
C1    1    0.604488    0.770646    0.522069    11.00000    0.01482    0.02012 = 
         0.01829    0.00360    0.00602    0.00406 
AFIX  43 
H1    2    0.516403    0.772931    0.530321    11.00000   -1.20000 
AFIX   0 
C2    1    0.669880    0.711617    0.567684    11.00000    0.02271    0.02233 = 
         0.01743    0.00889    0.01002    0.00725 
AFIX  43 
H2    2    0.625692    0.672743    0.607480    11.00000   -1.20000 
AFIX   0 
C3    1    0.801955    0.706947    0.557106    11.00000    0.02069    0.01413 = 
         0.01559    0.00244    0.00505    0.00540 
C4    1    0.868950    0.766425    0.502212    11.00000    0.01551    0.01679 = 
         0.02097    0.00449    0.00399    0.00613 
AFIX  43 
H4    2    0.958718    0.765841    0.496484    11.00000   -1.20000 
AFIX   0 
C5    1    0.805101    0.828782    0.453956    11.00000    0.01720    0.01568 = 
         0.01187    0.00100    0.00413    0.00524 
C6    1    0.669869    0.827959    0.462688    11.00000    0.01705    0.01403 = 
         0.01669    0.00229    0.00395    0.00540 
C7    1    0.626029    0.890123    0.403027    11.00000    0.01933    0.01445 = 
         0.01674    0.00406    0.00462    0.00618 
C8    1    0.736163    0.929229    0.358877    11.00000    0.01730    0.01559 = 
         0.01600    0.00495    0.00612    0.00670 
C9    1    0.847718    0.886980    0.385984    11.00000    0.01783    0.01691 = 
         0.01669    0.00483    0.00390    0.00716 
C10   1    0.716257    0.989282    0.293291    11.00000    0.01871    0.01335 = 
         0.01820    0.00508    0.00689    0.00380 
AFIX  43 
H10   2    0.786778    1.012670    0.261662    11.00000   -1.20000 
AFIX   0 
C11   1    0.596633    1.014270    0.274659    11.00000    0.02148    0.01358 = 
         0.01783    0.00381    0.00402    0.00636 
C12   1    0.491704    0.977477    0.321546    11.00000    0.01930    0.02387 = 
         0.02089    0.00658    0.00523    0.01262 
AFIX  43 
H12   2    0.409480    0.995710    0.309054    11.00000   -1.20000 
AFIX   0 
C13   1    0.503900    0.917083    0.383746    11.00000    0.01919    0.02480 = 
         0.02134    0.00862    0.01009    0.01085 
AFIX  43 
H13   2    0.431250    0.893365    0.413804    11.00000   -1.20000 
AFIX   0 
C14   1    0.570476    1.077341    0.203048    11.00000    0.02215    0.02024 = 
         0.02328    0.00962    0.00593    0.00945 
C15   1    0.434339    0.978869    0.122547    11.00000    0.02799    0.02744 = 
         0.02572    0.01176    0.00008    0.01017 
AFIX 137 
H15A  2    0.351247    0.956412    0.147115    11.00000   -1.50000 
H15B  2    0.448221    0.900987    0.094208    11.00000   -1.50000 
H15C  2    0.416824    1.016478    0.075035    11.00000   -1.50000 
AFIX   0 
C16   1    0.694996    1.117257    0.161021    11.00000    0.02790    0.02833 = 
         0.02624    0.01665    0.00761    0.01012 
AFIX 137 
H16A  2    0.671175    1.154828    0.114762    11.00000   -1.50000 
H16B  2    0.710866    1.041350    0.130413    11.00000   -1.50000 
H16C  2    0.782857    1.181209    0.210918    11.00000   -1.50000 
AFIX   0 
C17   1    0.546519    1.197003    0.249058    11.00000    0.03977    0.02551 = 
         0.03245    0.01352    0.00965    0.01633 
AFIX 137 
H17A  2    0.461413    1.171775    0.271448    11.00000   -1.50000 
H17B  2    0.531334    1.237540    0.203109    11.00000   -1.50000 
H17C  2    0.631464    1.258352    0.302092    11.00000   -1.50000 
AFIX   0 
C18   1    0.863715    0.631999    0.606018    11.00000    0.02258    0.01625 = 
         0.02139    0.00836    0.00480    0.00880 
C19   1    0.878410    0.681072    0.711326    11.00000    0.03295    0.03576 = 
         0.02507    0.01548    0.00826    0.01785 
AFIX 137 
H19A  2    0.939486    0.773990    0.738627    11.00000   -1.50000 
H19B  2    0.922445    0.635969    0.742514    11.00000   -1.50000 
H19C  2    0.782662    0.664522    0.719934    11.00000   -1.50000 
AFIX   0 
C20   1    0.761284    0.488357    0.561427    11.00000    0.02867    0.02147 = 
         0.03707    0.01183    0.00678    0.00930 
AFIX 137 
H20A  2    0.665275    0.476381    0.567990    11.00000   -1.50000 
H20B  2    0.798360    0.439717    0.592996    11.00000   -1.50000 
H20C  2    0.754724    0.457130    0.494784    11.00000   -1.50000 
AFIX   0 
C21   1    1.013358    0.648442    0.595368    11.00000    0.02637    0.02737 = 
         0.02931    0.01392    0.00511    0.01540 
AFIX 137 
H21A  2    1.005939    0.615021    0.528722    11.00000   -1.50000 
H21B  2    1.050131    0.600662    0.628048    11.00000   -1.50000 
H21C  2    1.079570    0.740144    0.622532    11.00000   -1.50000 
AFIX   0 
C22   1    0.811653    0.578917    0.166710    11.00000    0.02048    0.02089 = 
         0.01877    0.00709    0.00850    0.00873 
C23   1    0.905023    0.634668    0.108634    11.00000    0.02167    0.01610 = 
         0.01728    0.00025    0.00607    0.00605 
C24   1    1.033163    0.623556    0.109617    11.00000    0.02609    0.02378 = 
         0.02083    0.00339    0.00821    0.00963 
AFIX  43 
H24   2    1.061666    0.579308    0.146628    11.00000   -1.20000 
AFIX   0 
C25   1    1.123403    0.673585    0.059355    11.00000    0.02038    0.03090 = 
         0.02901    0.00063    0.01126    0.00549 
AFIX  43 
H25   2    1.211237    0.663746    0.062997    11.00000   -1.20000 
AFIX   0 
C26   1    1.085585    0.736395    0.005186    11.00000    0.03041    0.02848 = 
         0.02444   -0.00022    0.01521    0.00230 
AFIX  43 
H26   2    1.146448    0.769315   -0.029889    11.00000   -1.20000 
AFIX   0 
C27   1    0.956053    0.753238    0.000552    11.00000    0.03153    0.02155 = 
         0.02030    0.00243    0.01017    0.00450 
C28   1    0.863906    0.703064    0.052459    11.00000    0.02174    0.01781 = 
         0.01662    0.00075    0.00339    0.00397 
C29   1    0.739490    0.728923    0.048297    11.00000    0.02584    0.02632 = 
         0.02126    0.00812    0.00666    0.00904 
AFIX  43 
H29   2    0.677806    0.700082    0.084140    11.00000   -1.20000 
AFIX   0 
C30   1    0.706430    0.794239   -0.005986    11.00000    0.03494    0.03500 = 
         0.02713    0.01205    0.00094    0.01446 
AFIX  43 
H30   2    0.620563    0.807464   -0.009221    11.00000   -1.20000 
AFIX   0 
C31   1    0.797548    0.841799   -0.056799    11.00000    0.04655    0.04188 = 
         0.02796    0.02086    0.00624    0.01502 
AFIX  43 
H31   2    0.773952    0.887623   -0.094153    11.00000   -1.20000 
AFIX   0 
C32   1    0.919381    0.822649   -0.052853    11.00000    0.04213    0.03447 = 
         0.01879    0.01162    0.00999    0.00612 
AFIX  43 
H32   2    0.981612    0.856741   -0.086832    11.00000   -1.20000 
AFIX   0 
C33   1    0.662425    0.477603    0.103188    11.00000    0.02476    0.02184 = 
         0.01973    0.00294    0.00839    0.00643 
AFIX 137 
H33A  2    0.604039    0.443597    0.141522    11.00000   -1.50000 
H33B  2    0.672842    0.407048    0.058892    11.00000   -1.50000 
H33C  2    0.614797    0.517259    0.068456    11.00000   -1.50000 
AFIX   0 
C34   1    0.875499    0.507738    0.219021    11.00000    0.03161    0.02035 = 
         0.03287    0.01186    0.01144    0.01363 
AFIX 137 
H34A  2    0.971487    0.568010    0.261925    11.00000   -1.50000 
H34B  2    0.883356    0.436609    0.173561    11.00000   -1.50000 
H34C  2    0.812227    0.473364    0.254818    11.00000   -1.50000 
AFIX   0 
C35   1    0.473696    0.667327    0.193232    11.00000    0.01911    0.02717 = 
         0.03213    0.00497    0.00205    0.00779 
AFIX 137 
H35A  2    0.496838    0.738892    0.169803    11.00000   -1.50000 
H35B  2    0.393889    0.662396    0.220414    11.00000   -1.50000 
H35C  2    0.445396    0.586294    0.141359    11.00000   -1.50000 
AFIX   0 
C36   1    0.570472    0.529974    0.326793    11.00000    0.03395    0.01988 = 
         0.03271    0.00492    0.01448    0.00516 
AFIX 137 
H36A  2    0.473023    0.474861    0.283968    11.00000   -1.50000 
H36B  2    0.566165    0.552776    0.391588    11.00000   -1.50000 
H36C  2    0.632134    0.483520    0.318980    11.00000   -1.50000 
AFIX   0 
C37   1    1.110357    0.818903    0.371151    11.00000    0.01996    0.02388 = 
         0.02366    0.00084    0.00549    0.00802 
AFIX 137 
H37A  2    1.078354    0.752137    0.398561    11.00000   -1.50000 
H37B  2    1.174802    0.901559    0.421069    11.00000   -1.50000 
H37C  2    1.162036    0.795090    0.326969    11.00000   -1.50000 
AFIX   0 
C38   1    1.024743    0.947876    0.248199    11.00000    0.02603    0.02116 = 
         0.02467    0.00724    0.01317    0.00684 
AFIX 137 
H38A  2    1.084648    0.919225    0.212947    11.00000   -1.50000 
H38B  2    1.083607    1.034461    0.295043    11.00000   -1.50000 
H38C  2    0.945132    0.949920    0.205057    11.00000   -1.50000 
AFIX   0 
HKLF 4 
  
REM  dm15342 in P-1 
REM R1 =  0.0508 for    3843 Fo > 4sig(Fo)  and  0.1014 for all    6105 data 
REM    382 parameters refined using      0 restraints 
  
END 
  
WGHT      0.0528      0.0000 
  
REM No hydrogen bonds found for HTAB generation 
  
REM Highest difference peak  0.386,  deepest hole -0.344,  1-sigma level  0.065 
Q1    1   0.5607  0.6819  0.2312  11.00000  0.05    0.39 
Q2    1   0.7324  0.7087  0.2538  11.00000  0.05    0.33 
Q3    1   0.5362  0.4467  0.2565  11.00000  0.05    0.32 
Q4    1   0.6415  0.5453  0.3961  11.00000  0.05    0.31 
Q5    1   0.8230  0.7578  0.0598  11.00000  0.05    0.31 
Q6    1   1.0551  0.8373  0.3271  11.00000  0.05    0.30 
Q7    1   0.9669  0.8989  0.2672  11.00000  0.05    0.29 
Q8    1   0.8060  0.9037  0.3605  11.00000  0.05    0.29 
Q9    1   0.8408  0.8662  0.4231  11.00000  0.05    0.29 
Q10   1   0.6359  0.8462  0.4273  11.00000  0.05    0.29 
Q11   1   0.6788  0.9221  0.3845  11.00000  0.05    0.29 
Q12   1   0.8055  0.6963  0.5043  11.00000  0.05    0.28 
Q13   1   0.4152  0.7363  0.1940  11.00000  0.05    0.27 
Q14   1   0.5868  0.7533  0.3062  11.00000  0.05    0.27 
Q15   1   0.8361  0.6625  0.5764  11.00000  0.05    0.27 
Q16   1   0.5555  0.8786  0.3739  11.00000  0.05    0.27 
Q17   1   0.7462  0.8446  0.4660  11.00000  0.05    0.27 
Q18   1   0.5780  1.0349  0.2362  11.00000  0.05    0.26 
Q19   1   0.6272  0.9724  0.2648  11.00000  0.05    0.26 
Q20   1   0.6401  0.6214  0.3346  11.00000  0.05    0.26 
; 
_shelx_res_checksum   40736 
  
_shelx_hkl_file 
; 
  -1   0   1   92.85    1.10 
  -1   0   1   96.05    1.05 
  -1   0   1   93.83    0.83 
  -2   0   2  169.81    1.53 
  -2   0   2  168.00    2.04 
  -3   0   3   62.27    0.88 
  -3   0   3   60.38    1.37 
  -4   0   4   49.17    1.36 
  -4   0   4   47.87    0.88 
  -5   0   5    4.99    0.71 
  -5   0   5    4.84    0.43 
  -6   0   6    0.78    0.68 
  -6   0   6    0.68    0.35 
  -7   0   7   45.04    1.93 
  -7   0   7   44.90    1.10 
  -8   0   8    0.20    0.86 
  -9   0   9    3.85    1.04 
 -10   0  10   11.68    1.49 
 -11   0  11   17.03    1.83 
 -12   1  11    4.80    1.47 
  12  -1 -11    4.56    1.60 
 -11   1  10    4.69    1.27 
 -10   1   9    4.87    1.14 
  -9   1   8    1.17    0.86 
  -8   1   7    8.92    1.22 
  -8   1   7   12.86    0.81 
  -7   1   6   20.16    1.44 
  -7   1   6   21.41    0.88 
  -6   1   5    2.75    0.46 
  -6   1   5    3.23    0.72 
  -5   1   4    2.84    0.51 
  -5   1   4    1.96    0.38 
  -5   1   4    2.86    0.59 
  -4   1   3   62.59    1.31 
  -4   1   3   64.45    1.47 
  -4   1   3   66.11    1.12 
  -3   1   2   88.50    1.41 
  -3   1   2   89.02    1.21 
  -3   1   2   88.85    1.51 
  -2   1   1   16.50    0.54 
  -2   1   1   14.64    0.55 
  -2   1   1   15.61    0.49 
  -1   1   0  200.16    1.71 
  -1   1   0  198.16    1.89 
  -1   1   0  202.41    1.74 
   0   1  -1  235.22    1.76 
   0   1  -1  231.23    2.22 
   0  -1   1  232.64    2.04 
   1   1  -2    0.37    0.25 
  -1  -1   2    0.25    0.24 
  -2  -1   3    0.25    0.15 
  -2  -1   3   -0.56    0.42 
  -3  -1   4    5.28    0.31 
  -3  -1   4    4.50    0.56 
  -4  -1   5   31.21    0.61 
  -4  -1   5   30.20    1.28 
  -5  -1   6    8.25    0.46 
  -5  -1   6    8.41    0.87 
  -6  -1   7   16.46    1.31 
  -7  -1   8   50.94    2.03 
  -8  -1   9    0.39    0.84 
  -9  -1  10   14.07    1.60 
 -10  -1  11    8.27    1.45 
  11   1 -12   14.30    1.65 
  11   1 -12   13.71    2.09 
 -11  -1  12   10.25    1.68 
 -12   2  10    7.78    1.48 
  12  -2 -10    6.65    1.67 
 -11   2   9   -1.19    0.95 
 -10   2   8    0.74    0.92 
  -9   2   7    0.36    0.52 
  -9   2   7    1.73    0.84 
  -8   2   6   34.12    1.20 
  -8   2   6   30.34    1.69 
  -7   2   5    6.48    0.66 
  -7   2   5    6.04    0.78 
  -7   2   5    7.26    0.96 
  -6   2   4   27.91    0.97 
  -6   2   4   28.89    1.14 
  -6   2   4   30.88    1.23 
  -5   2   3  131.25    1.89 
  -5   2   3  132.84    2.14 
  -5   2   3  130.06    2.21 
  -4   2   2   16.35    0.77 
  -4   2   2   15.17    0.79 
  -4   2   2   16.49    0.66 
  -3   2   1   11.22    0.59 
  -3   2   1    9.46    0.57 
  -3   2   1   10.55    0.64 
  -2   2   0   28.70    0.59 
  -2   2   0   29.49    0.72 
  -2   2   0   28.71    0.80 
  -1   2  -1  101.20    1.39 
  -1   2  -1  103.51    1.15 
   0   2  -2  109.53    1.06 
   0  -2   2  104.39    1.25 
   1   2  -3    5.62    0.67 
  -1  -2   3    5.91    0.50 
   2   2  -4   36.71    1.20 
  -2  -2   4   38.33    1.14 
  -3  -2   5   41.95    1.29 
  -4  -2   6    0.31    0.51 
  -5  -2   7   20.48    1.26 
  -6  -2   8   34.21    1.68 
  -7  -2   9    1.05    0.92 
   8   2 -10    3.64    1.05 
  -8  -2  10    1.35    1.00 
   9   2 -11    1.50    1.05 
  -9  -2  11    2.00    1.06 
  10   2 -12    9.21    1.53 
 -10  -2  12    4.44    1.28 
 -12   3   9    6.54    1.41 
  12  -3  -9    7.66    1.63 
 -11   3   8    1.50    1.01 
 -10   3   7   -0.39    0.55 
 -10   3   7    0.01    0.86 
  -9   3   6    1.85    0.59 
  -9   3   6    1.40    0.68 
  -9   3   6    2.46    0.93 
  -8   3   5   32.13    1.60 
  -8   3   5   32.08    1.25 
  -8   3   5   36.58    1.47 
  -7   3   4    1.55    0.50 
  -7   3   4    2.67    0.73 
  -7   3   4    1.49    0.56 
  -6   3   3   21.80    0.93 
  -6   3   3   21.01    1.06 
  -6   3   3   21.58    1.02 
  -5   3   2    7.68    0.63 
  -5   3   2    8.07    0.65 
  -5   3   2    7.32    0.63 
  -4   3   1    1.96    0.40 
  -4   3   1    1.60    0.40 
  -4   3   1    1.13    0.35 
  -3   3   0   -0.18    0.29 
  -3   3   0    0.07    0.26 
  -3   3   0    0.70    0.35 
  -2   3  -1   17.66    0.62 
  -2   3  -1   19.47    0.83 
  -1   3  -2    8.12    0.72 
  -1   3  -2    9.19    0.50 
   1  -3   2    9.57    0.39 
   0   3  -3    3.97    0.30 
   0   3  -3    4.24    0.69 
   0  -3   3    3.49    0.40 
   1   3  -4    6.18    0.72 
  -1  -3   4    6.53    0.56 
   2   3  -5   23.43    1.29 
  -2  -3   5   20.49    0.97 
   3   3  -6    6.36    0.85 
  -3  -3   6    5.53    0.73 
   4   3  -7    2.98    0.80 
  -4  -3   7    2.82    0.74 
   5   3  -8   27.02    1.68 
  -5  -3   8   29.04    1.59 
   6   3  -9   -1.19    0.98 
  -6  -3   9   -0.07    0.88 
   7   3 -10    0.46    0.99 
  -7  -3  10   -0.70    0.88 
   8   3 -11    1.45    1.10 
  -8  -3  11    0.63    0.93 
   9   3 -12    4.47    1.33 
  -9  -3  12    3.55    1.22 
  10   3 -13    0.60    1.23 
  10   3 -13    0.11    1.19 
 -10  -3  13   -1.82    1.08 
 -12   4   8   -0.45    1.04 
  12  -4  -8    2.07    1.33 
 -11   4   7   -1.46    0.81 
 -11   4   7   -0.05    0.61 
  11  -4  -7   -0.07    1.08 
 -10   4   6    3.26    0.97 
 -10   4   6    3.64    0.82 
 -10   4   6    3.63    0.73 
  -9   4   5   -0.14    0.62 
  -9   4   5   -0.08    0.80 
  -9   4   5    0.32    0.53 
  -8   4   4    0.68    0.59 
  -8   4   4    0.19    0.54 
  -8   4   4   -0.28    0.76 
  -7   4   3   -0.13    0.43 
  -7   4   3    0.27    0.58 
  -7   4   3    0.10    0.50 
  -6   4   2   47.15    1.34 
  -6   4   2   47.76    1.42 
  -6   4   2   45.22    1.28 
  -5   4   1   -0.03    0.38 
  -5   4   1   -0.79    0.36 
  -5   4   1   -0.71    0.35 
  -4   4   0    0.41    0.30 
  -4   4   0    0.19    0.32 
  -4   4   0    0.28    0.39 
  -3   4  -1    1.70    0.38 
  -3   4  -1    1.35    0.43 
   3  -4   1    1.20    0.24 
  -2   4  -2    2.47    0.36 
  -2   4  -2    1.91    0.53 
  -1   4  -3   15.17    1.05 
  -1   4  -3   15.33    0.59 
   1  -4   3   15.71    0.54 
   0   4  -4    6.72    0.42 
   0   4  -4    6.19    0.78 
   0  -4   4    7.41    0.52 
   1   4  -5   20.16    1.42 
  -1  -4   5   20.29    0.92 
   2   4  -6   -0.06    0.70 
  -2  -4   6   -0.10    0.46 
   3   4  -7    1.85    0.87 
  -3  -4   7    3.11    0.66 
   4   4  -8   28.61    1.92 
  -4  -4   8   26.55    1.40 
   5   4  -9   18.98    1.65 
  -5  -4   9   23.13    1.62 
   6   4 -10   -1.09    1.05 
  -6  -4  10   -0.59    0.79 
   7   4 -11    0.34    1.09 
  -7  -4  11    0.57    0.89 
   8   4 -12    6.32    1.41 
  -8  -4  12    3.44    1.20 
   9   4 -13    1.71    1.31 
  -9  -4  13   -0.19    1.02 
  12  -5  -7    1.93    1.16 
 -11   5   6   -0.89    0.68 
 -11   5   6   -0.56    0.86 
 -11   5   6    0.73    0.62 
  11  -5  -6    3.88    1.21 
 -10   5   5   15.10    1.14 
 -10   5   5   15.64    1.23 
 -10   5   5   14.40    1.32 
  -9   5   4    0.87    0.75 
  -9   5   4    0.05    0.61 
  -9   5   4   -0.01    0.55 
  -8   5   3    3.24    0.69 
  -8   5   3    3.54    0.81 
  -8   5   3    3.03    0.71 
  -7   5   2    0.17    0.57 
  -7   5   2    1.39    0.57 
  -7   5   2    0.89    0.55 
  -6   5   1    7.20    0.73 
  -6   5   1    7.56    0.65 
  -6   5   1    7.67    0.75 
  -5   5   0    1.59    0.38 
  -5   5   0    1.32    0.47 
  -5   5   0    2.10    0.52 
  -4   5  -1    3.19    0.55 
  -4   5  -1    3.21    0.50 
   4  -5   1    3.64    0.35 
  -3   5  -2   44.54    1.39 
  -3   5  -2   44.92    1.10 
  -2   5  -3   14.20    0.68 
  -2   5  -3   15.61    1.16 
  -1   5  -4   22.25    1.28 
  -1   5  -4   23.09    0.73 
   1  -5   4   21.49    0.68 
   0   5  -5    7.68    0.94 
   0   5  -5    6.37    0.45 
   0  -5   5    6.08    0.57 
   1   5  -6    1.00    0.78 
  -1  -5   6    0.85    0.49 
   2   5  -7    3.73    1.06 
  -2  -5   7    3.04    0.62 
   3   5  -8    0.62    1.05 
  -3  -5   8    0.79    0.70 
   4   5  -9    2.21    1.23 
  -4  -5   9    2.58    0.89 
   5   5 -10   -0.54    1.06 
  -5  -5  10   -0.01    0.86 
   6   5 -11   -0.54    1.13 
  -6  -5  11    0.76    0.96 
   7   5 -12    2.25    1.23 
  -7  -5  12    2.15    1.02 
   8   5 -13    1.43    1.32 
  -8  -5  13    1.59    1.20 
   9   5 -14    2.71    1.55 
   9   5 -14    4.86    1.57 
  -9  -5  14    3.54    1.42 
 -12   6   6    2.13    0.92 
 -12   6   6    3.12    0.83 
  12  -6  -6    1.68    1.22 
 -11   6   5    2.26    0.83 
 -11   6   5    2.48    0.76 
  11  -6  -5    5.60    1.24 
 -10   6   4    3.46    0.91 
 -10   6   4    2.53    0.71 
 -10   6   4    3.39    0.84 
  10  -6  -4    3.26    1.04 
  -9   6   3    1.42    0.72 
  -9   6   3    1.15    0.67 
  -9   6   3    1.50    0.66 
   9  -6  -3    1.98    0.88 
  -8   6   2    3.82    0.78 
  -8   6   2    3.50    0.70 
  -8   6   2    4.00    0.73 
  -7   6   1    0.55    0.51 
  -7   6   1    1.10    0.56 
  -7   6   1    0.91    0.55 
   7  -6  -1    1.95    0.70 
  -6   6   0    3.66    0.68 
  -6   6   0    3.70    0.61 
   6  -6   0    5.07    0.63 
  -5   6  -1    1.03    0.46 
  -5   6  -1    1.24    0.56 
   5  -6   1    0.81    0.36 
  -4   6  -2   25.00    1.02 
  -4   6  -2   23.46    1.22 
  -3   6  -3   19.79    0.83 
  -3   6  -3   17.60    1.13 
  -2   6  -4   92.09    1.25 
  -2   6  -4   94.05    1.61 
  -2   6  -4   93.70    2.21 
  -1   6  -5   13.72    0.66 
  -1   6  -5   13.39    0.81 
  -1   6  -5   11.67    1.13 
   1  -6   5   12.16    0.67 
   0   6  -6    1.44    0.33 
   0   6  -6    0.42    0.81 
   0  -6   6    1.24    0.50 
   1   6  -7    1.58    0.92 
  -1  -6   7   -0.03    0.56 
   2   6  -8    1.22    1.05 
  -2  -6   8    0.95    0.73 
   3   6  -9   18.99    1.82 
  -3  -6   9   20.48    1.44 
   4   6 -10   11.76    1.65 
  -4  -6  10   12.02    1.29 
   5   6 -11   -0.97    1.20 
  -5  -6  11   -0.92    0.85 
   6   6 -12   -0.48    1.32 
  -6  -6  12    0.54    0.96 
   7   6 -13    1.98    1.48 
  -7  -6  13    6.03    1.34 
   8   6 -14    2.23    1.57 
   8   6 -14    2.22    1.44 
  -8  -6  14   -1.49    1.12 
 -12   7   5   -0.10    0.70 
 -12   7   5    0.35    0.77 
 -11   7   4   -0.38    0.69 
 -11   7   4    1.11    0.72 
 -10   7   3    0.95    0.67 
 -10   7   3    0.39    0.66 
  -9   7   2    1.29    0.69 
  -9   7   2    0.97    0.66 
  -8   7   1    3.94    0.80 
  -8   7   1    2.99    0.70 
   8  -7  -1    3.72    0.82 
  -7   7   0   -0.10    0.57 
  -7   7   0    0.03    0.59 
   7  -7   0    1.43    0.63 
  -6   7  -1    0.96    0.57 
  -6   7  -1    0.40    0.63 
   6  -7   1    1.60    0.44 
  -5   7  -2    3.17    0.63 
  -5   7  -2    3.51    0.75 
  -4   7  -3    4.95    0.81 
  -4   7  -3    6.36    0.65 
  -3   7  -4    1.57    0.73 
  -3   7  -4    1.62    0.46 
  -2   7  -5    0.43    0.41 
  -2   7  -5   -0.38    0.35 
  -2   7  -5   -0.50    0.70 
  -1   7  -6    0.73    0.85 
  -1   7  -6    0.75    0.38 
  -1   7  -6    0.89    0.53 
   0   7  -7    0.04    0.97 
   0  -7   7    0.29    0.54 
   1   7  -8    1.14    1.08 
  -1  -7   8    2.61    0.71 
   2   7  -9    1.05    1.23 
  -2  -7   9    0.64    0.76 
   3   7 -10   29.00    2.25 
  -3  -7  10   28.07    1.60 
   4   7 -11    3.36    1.48 
  -4  -7  11    2.68    0.95 
   5   7 -12    3.70    1.50 
  -5  -7  12    4.36    1.12 
   6   7 -13    0.32    1.15 
   6   7 -13   -1.38    1.48 
  -6  -7  13   -0.84    0.96 
   7   7 -14   -1.70    1.19 
   7   7 -14    0.09    1.57 
  -7  -7  14    0.09    1.02 
 -13   8   5    1.11    0.81 
 -12   8   4   -0.29    0.75 
 -12   8   4   -0.09    0.73 
 -11   8   3    1.94    0.78 
 -11   8   3    2.06    0.84 
 -10   8   2    2.00    0.75 
 -10   8   2    2.38    0.82 
  -9   8   1    9.33    1.02 
  -9   8   1   10.00    1.09 
  -8   8   0   -0.07    0.60 
  -8   8   0    0.09    0.66 
  -7   8  -1   44.28    1.70 
  -7   8  -1   44.74    1.60 
  -6   8  -2    0.04    0.57 
  -6   8  -2    2.72    0.77 
  -5   8  -3   -1.02    0.62 
  -5   8  -3   -0.20    0.52 
  -4   8  -4   13.33    1.18 
  -4   8  -4   14.39    0.89 
  -3   8  -5    5.99    1.06 
  -3   8  -5    7.22    0.71 
  -2   8  -6    2.80    0.95 
  -2   8  -6    1.22    0.45 
  -2   8  -6    1.32    0.51 
  -1   8  -7    1.26    0.65 
  -1   8  -7    0.77    0.42 
  -1   8  -7    1.97    1.04 
   0   8  -8    6.61    1.37 
   0   8  -8    6.42    0.94 
   0  -8   8    7.91    0.86 
   1   8  -9    8.67    1.15 
   1   8  -9    7.42    1.56 
  -1  -8   9    7.17    0.95 
   2   8 -10    3.22    1.42 
  -2  -8  10    1.23    0.80 
   3   8 -11    1.48    1.43 
  -3  -8  11    1.19    0.85 
   4   8 -12   -0.87    1.29 
   4   8 -12    1.36    1.11 
  -4  -8  12   -0.44    0.87 
   5   8 -13    1.31    1.43 
   5   8 -13    3.26    1.28 
  -5  -8  13    1.65    1.05 
   6   8 -14    0.18    1.65 
   6   8 -14    2.61    1.34 
  -6  -8  14   -0.49    1.07 
 -12   9   3    7.49    1.20 
 -12   9   3    4.97    0.99 
 -11   9   2    0.43    0.79 
 -11   9   2    0.27    0.76 
 -10   9   1    0.19    0.69 
 -10   9   1    0.70    0.72 
  -9   9   0    1.37    0.72 
  -9   9   0    1.57    0.76 
  -8   9  -1    3.68    0.79 
  -8   9  -1    3.55    0.80 
  -7   9  -2    9.78    1.11 
  -7   9  -2    9.59    0.97 
  -6   9  -3    7.80    1.10 
  -6   9  -3    9.94    0.99 
  -5   9  -4    2.53    0.62 
  -5   9  -4    4.15    0.99 
  -4   9  -5    1.76    0.93 
  -4   9  -5    1.73    0.61 
  -3   9  -6    2.75    0.99 
  -3   9  -6    3.19    0.59 
  -2   9  -7    0.61    1.08 
  -2   9  -7    0.74    0.49 
  -1   9  -8   16.17    1.19 
  -1   9  -8   16.51    1.74 
   0   9  -9   15.03    1.69 
   0   9  -9   16.46    1.35 
   1   9 -10   -0.83    1.28 
   1   9 -10    1.67    0.88 
   2   9 -11    0.33    1.25 
   2   9 -11    0.64    0.91 
  -2  -9  11   -0.73    0.79 
   3   9 -12    5.69    1.74 
   3   9 -12    7.68    1.32 
  -3  -9  12    3.12    1.11 
   4   9 -13    0.44    1.55 
   4   9 -13    3.92    1.26 
   5   9 -14   -1.94    1.59 
   5   9 -14    0.90    1.22 
 -12  10   2    5.35    1.10 
 -12  10   2    6.09    1.16 
 -11  10   1   -0.15    0.75 
 -11  10   1    0.72    0.83 
 -10  10   0    0.01    0.65 
 -10  10   0    0.89    0.77 
  -9  10  -1    1.21    0.73 
  -9  10  -1    0.66    0.78 
  -8  10  -2   12.73    1.17 
  -8  10  -2   10.44    1.20 
  -7  10  -3    5.30    1.01 
  -7  10  -3    3.74    0.80 
  -6  10  -4    4.84    1.02 
  -6  10  -4    3.56    0.73 
  -5  10  -5   16.61    1.44 
  -5  10  -5   13.89    1.06 
  -4  10  -6    1.23    0.57 
  -4  10  -6    0.89    0.98 
  -3  10  -7    3.14    1.06 
  -3  10  -7    1.05    0.55 
  -2  10  -8    4.53    0.64 
  -2  10  -8    4.36    1.25 
  -1  10  -9   12.34    1.66 
   0  10 -10   -0.03    1.26 
   1  10 -11    1.92    0.96 
   1  10 -11   -1.89    1.22 
   2  10 -12    7.37    1.28 
   2  10 -12    6.12    1.76 
   3  10 -13    2.44    1.68 
   3  10 -13    4.46    1.32 
   4  10 -14    3.88    1.36 
   4  10 -14    1.47    1.66 
 -12  11   1    3.30    1.00 
 -12  11   1    2.49    1.07 
 -11  11   0    1.16    0.86 
 -11  11   0    0.84    0.76 
 -10  11  -1    0.55    0.84 
 -10  11  -1    0.29    0.73 
  -9  11  -2    4.93    0.93 
  -9  11  -2    3.91    1.00 
  -8  11  -3    5.69    0.88 
  -8  11  -3    4.56    0.99 
  -7  11  -4    0.23    0.87 
  -7  11  -4    2.31    0.74 
  -6  11  -5    2.12    0.91 
  -6  11  -5    2.77    0.72 
  -5  11  -6    2.11    0.98 
  -5  11  -6    1.88    0.64 
  -4  11  -7    4.17    0.73 
  -4  11  -7    3.74    1.13 
  -3  11  -8   13.97    0.94 
  -3  11  -8   16.00    1.68 
  -2  11  -9    7.68    1.42 
  -1  11 -10   24.27    2.18 
   0  11 -11    4.21    1.55 
   1  11 -12    3.11    1.51 
   2  11 -13   -0.63    1.54 
   3  11 -14    1.42    1.63 
 -11  12  -1    3.98    1.09 
 -11  12  -1    2.76    0.98 
 -10  12  -2    2.08    0.83 
 -10  12  -2    0.05    0.88 
  -9  12  -3    5.59    1.16 
  -9  12  -3    7.16    1.13 
  -8  12  -4    4.64    1.14 
  -8  12  -4    5.96    0.99 
  -7  12  -5    0.56    0.98 
  -7  12  -5    0.54    0.67 
  -6  12  -6    1.81    1.06 
  -6  12  -6    1.82    0.70 
  -5  12  -7    3.12    0.74 
  -5  12  -7    3.25    1.16 
  -4  12  -8    2.25    1.18 
  -3  12  -9   -0.17    1.03 
  -2  12 -10    7.87    1.61 
  -1  12 -11    1.41    1.29 
   0  12 -12    2.27    1.45 
   1  12 -13    8.85    1.89 
   2  12 -14    3.49    1.77 
 -10  13  -3    4.07    1.14 
 -10  13  -3    2.95    0.97 
  -9  13  -4   12.83    1.37 
  -9  13  -4   10.68    1.48 
  -8  13  -5    1.40    0.95 
  -8  13  -5    1.37    0.77 
  -7  13  -6   -0.12    0.65 
  -7  13  -6   -0.10    0.99 
  -6  13  -7   -0.93    1.00 
  -6  13  -7    0.78    0.64 
  -5  13  -8    3.35    1.18 
  -5  13  -8    3.05    0.73 
  -4  13  -9    1.71    1.22 
  -3  13 -10    1.92    1.20 
  -2  13 -11    7.79    1.63 
  -1  13 -12    8.29    1.80 
   0  13 -13   -1.49    1.56 
  -9  14  -5    0.02    0.75 
  -9  14  -5    0.02    1.03 
  -8  14  -6   -0.62    1.04 
  -8  14  -6    0.25    0.73 
  -7  14  -7    0.13    0.68 
  -7  14  -7   -1.08    1.06 
  -6  14  -8    1.48    1.20 
  -5  14  -9   -1.62    1.12 
  -4  14 -10    3.55    1.36 
  -3  14 -11    8.75    1.72 
  -2  14 -12    1.60    1.51 
  -5  15  -9    0.22    1.25 
  -6  15  -8   -0.22    1.10 
  -1  14 -12   -2.21    1.22 
  -2  14 -11   -0.05    1.35 
  -3  14 -10    1.06    1.23 
  -4  14  -9    0.23    1.14 
  -5  14  -8   -1.51    1.03 
  -6  14  -7   -0.30    0.95 
  -7  14  -6   -0.50    1.04 
  -8  14  -5    2.91    1.15 
  -9  14  -4   -0.75    0.92 
   1  13 -13    0.15    1.52 
   0  13 -12   -0.10    1.37 
  -1  13 -11    1.74    1.42 
  -2  13 -10    1.96    1.36 
  -3  13  -9   -0.53    1.12 
  -4  13  -8    1.28    1.10 
  -5  13  -7   -1.18    0.85 
  -6  13  -6    4.04    1.14 
  -7  13  -5    2.71    0.81 
  -7  13  -5    2.38    1.02 
  -8  13  -4   -0.51    0.67 
  -8  13  -4   -0.85    0.91 
  -9  13  -3    2.27    0.88 
  -9  13  -3    1.97    1.06 
 -10  13  -2    2.26    1.06 
 -10  13  -2    1.02    0.88 
   2  12 -13   -0.33    1.64 
   1  12 -12    0.87    1.55 
   0  12 -11    0.27    1.26 
  -1  12 -10    2.64    1.44 
  -2  12  -9    7.73    1.41 
  -3  12  -8    4.28    1.20 
  -4  12  -7    3.53    1.14 
  -5  12  -6    2.05    1.07 
  -5  12  -6    1.85    0.67 
  -6  12  -5    3.34    1.04 
  -6  12  -5    2.31    0.73 
  -7  12  -4   -1.52    0.76 
  -7  12  -4   -0.09    0.67 
  -8  12  -3   -1.44    0.83 
  -8  12  -3    0.25    0.65 
  -9  12  -2    1.48    0.87 
  -9  12  -2    1.64    0.83 
 -10  12  -1    0.62    0.71 
 -10  12  -1   -0.70    0.82 
 -11  12   0    2.19    0.88 
 -11  12   0    1.75    0.98 
   4  11 -14   -3.24    1.69 
   4  11 -14    0.73    1.36 
   3  11 -13   -1.48    1.56 
   2  11 -12    5.83    1.70 
   1  11 -11    3.60    1.47 
   0  11 -10   -1.34    1.12 
  -1  11  -9    4.91    1.40 
  -2  11  -8   29.74    2.16 
  -3  11  -7    2.25    1.09 
  -4  11  -6    0.14    0.53 
  -4  11  -6    0.44    0.95 
  -5  11  -5    7.45    1.20 
  -5  11  -5    8.23    0.92 
  -6  11  -4   36.04    1.56 
  -6  11  -4   35.29    1.87 
  -7  11  -3    1.54    0.84 
  -7  11  -3    0.20    0.68 
  -8  11  -2    2.68    1.00 
  -8  11  -2    4.79    0.92 
  -9  11  -1    3.58    0.91 
  -9  11  -1    2.85    0.95 
 -10  11   0    0.35    0.81 
 -10  11   0   -0.68    0.71 
 -11  11   1    3.15    0.97 
 -11  11   1    1.31    0.86 
 -12  11   2    3.00    1.07 
   5  10 -14    1.64    1.83 
   5  10 -14    0.19    1.32 
   4  10 -13    1.35    1.21 
   4  10 -13   -0.14    1.65 
   3  10 -12   12.56    2.10 
   3  10 -12   14.36    1.70 
   2  10 -11    7.51    1.62 
   2  10 -11    6.46    1.23 
   1  10 -10    2.61    1.06 
   1  10 -10    1.58    1.37 
   0  10  -9    1.94    1.27 
   0  10  -9    1.25    0.79 
  -1  10  -8    9.97    1.46 
  -2  10  -7   24.21    1.90 
  -3  10  -6    9.42    0.86 
  -3  10  -6    5.83    1.22 
  -4  10  -5   -0.36    0.83 
  -4  10  -5    0.27    0.54 
  -5  10  -4    0.66    0.88 
  -5  10  -4   -0.13    0.51 
  -6  10  -3    1.15    0.63 
  -6  10  -3   -0.69    0.77 
  -7  10  -2    3.31    0.91 
  -7  10  -2    3.00    0.72 
  -8  10  -1    2.48    0.75 
  -8  10  -1    0.92    0.74 
  -9  10   0    6.12    1.01 
  -9  10   0    3.02    0.86 
 -10  10   1   -0.36    0.64 
 -10  10   1    0.01    0.73 
 -11  10   2    3.99    0.97 
 -11  10   2    3.43    0.94 
 -12  10   3    8.18    1.17 
 -12  10   3    6.76    1.21 
   6   9 -14    8.64    1.81 
   6   9 -14    2.96    1.87 
   5   9 -13    2.31    1.33 
   5   9 -13   -0.48    1.54 
   4   9 -12    1.50    1.19 
   4   9 -12    2.20    1.44 
   3   9 -11    8.26    1.79 
   3   9 -11   10.68    1.49 
   2   9 -10   22.23    2.14 
   2   9 -10   24.71    1.79 
   1   9  -9   -0.28    0.88 
   1   9  -9    0.77    1.20 
   0   9  -8   44.70    2.43 
   0   9  -8   44.08    1.88 
  -1   9  -7   33.87    2.14 
  -1   9  -7   35.63    1.59 
  -2   9  -6    0.39    1.04 
  -3   9  -5   20.37    1.07 
  -3   9  -5   22.74    1.78 
  -4   9  -4   30.14    1.66 
  -4   9  -4   33.96    1.31 
  -5   9  -3    1.60    0.81 
  -5   9  -3    1.39    0.59 
  -6   9  -2   20.27    1.23 
  -6   9  -2   21.81    1.55 
  -7   9  -1   12.68    1.05 
  -7   9  -1   13.68    1.23 
  -8   9   0   20.79    1.37 
  -8   9   0   19.83    1.31 
  -9   9   1    3.13    0.80 
  -9   9   1    5.10    0.96 
 -10   9   2    3.82    0.85 
 -10   9   2    3.52    0.93 
 -11   9   3    6.27    1.06 
 -11   9   3    6.18    1.08 
 -12   9   4    2.95    1.00 
   7   8 -14    5.03    1.96 
   7   8 -14    6.75    1.63 
   6   8 -13   13.96    2.15 
   6   8 -13   15.10    1.98 
   5   8 -12    0.80    1.16 
   5   8 -12    1.61    1.51 
   4   8 -11   27.94    2.30 
   4   8 -11   26.98    2.09 
   3   8 -10    6.27    1.43 
   3   8 -10    6.02    1.19 
   2   8  -9   12.25    1.66 
   2   8  -9   11.04    1.35 
   1   8  -8   23.98    1.98 
   1   8  -8   26.53    1.75 
   0   8  -7   12.58    1.14 
   0   8  -7    8.75    1.34 
  -1   8  -6    0.55    0.61 
  -1   8  -6    0.13    0.99 
  -2   8  -5    0.05    0.40 
  -2   8  -5    0.18    0.50 
  -2   8  -5   -0.03    0.80 
  -3   8  -4   14.96    1.24 
  -3   8  -4   15.78    0.90 
  -4   8  -3   33.99    1.21 
  -4   8  -3   33.50    1.65 
  -5   8  -2    0.51    0.49 
  -5   8  -2    0.24    0.72 
  -6   8  -1   27.78    1.25 
  -6   8  -1   34.64    1.64 
  -7   8   0   64.86    2.03 
  -7   8   0   64.99    1.86 
  -8   8   1   15.24    1.17 
  -8   8   1   13.41    1.08 
  -9   8   2    0.67    0.69 
  -9   8   2   -0.02    0.56 
 -10   8   3   14.15    1.32 
 -10   8   3   16.16    1.31 
 -11   8   4   12.55    1.20 
 -11   8   4   13.57    1.36 
 -12   8   5    0.16    0.79 
   8   7 -14    3.69    1.80 
   8   7 -14    9.49    1.91 
   7   7 -13   11.35    1.99 
   7   7 -13    9.93    1.78 
  -6  -7  12    1.56    1.11 
   6   7 -12    2.71    1.45 
   6   7 -12    2.40    1.28 
  -5  -7  11   14.46    1.49 
   5   7 -11   14.94    1.75 
   5   7 -11   18.39    2.07 
  -4  -7  10   16.81    1.43 
   4   7 -10   15.94    1.88 
   4   7 -10   18.52    1.74 
  -3  -7   9    1.28    0.87 
   3   7  -9    0.80    1.37 
   3   7  -9    1.09    1.01 
  -2  -7   8    6.98    0.95 
   2   7  -8    6.50    1.07 
   2   7  -8    8.25    1.37 
   1   7  -7   22.84    1.77 
   1   7  -7   20.77    1.51 
   0   7  -6   31.77    1.41 
   0   7  -6   31.32    1.86 
  -1   7  -5    1.42    0.88 
  -1   7  -5    0.51    0.54 
  -1   7  -5    1.01    0.36 
  -2   7  -4   15.20    0.78 
  -2   7  -4   16.68    1.31 
  -2   7  -4   14.55    0.78 
  -3   7  -3   70.68    2.01 
  -3   7  -3   67.83    1.52 
  -4   7  -2    3.32    0.55 
  -4   7  -2    3.65    0.76 
  -5   7  -1    0.93    0.63 
  -5   7  -1    1.01    0.49 
  -6   7   0   32.93    0.87 
  -6   7   0   31.60    1.31 
  -6   7   0   34.01    1.43 
  -7   7   1   19.24    1.32 
  -7   7   1   19.55    0.95 
  -7   7   1   18.91    1.17 
  -8   7   2   -0.30    0.61 
  -8   7   2    0.55    0.59 
  -8   7   2    0.35    0.57 
  -9   7   3    2.39    0.78 
  -9   7   3    1.37    0.67 
  -9   7   3    1.99    0.73 
 -10   7   4   19.87    1.26 
 -10   7   4   19.22    1.43 
 -11   7   5    4.40    0.97 
 -11   7   5    2.55    0.79 
 -12   7   6    0.83    0.86 
   8   6 -13    8.88    1.86 
   8   6 -13    9.08    1.85 
  -7  -6  12    2.57    1.19 
   7   6 -12    5.45    1.58 
   7   6 -12    4.17    1.42 
  -6  -6  11    4.71    1.09 
   6   6 -11    5.79    1.39 
   6   6 -11    5.79    1.56 
  -5  -6  10   12.85    1.38 
   5   6 -10   12.76    1.75 
  -4  -6   9   20.19    1.41 
   4   6  -9   22.85    2.02 
  -3  -6   8    1.82    0.83 
   3   6  -8    1.60    1.13 
  -2  -6   7    4.56    0.78 
   2   6  -7    3.79    1.17 
  -1  -6   6   14.95    1.02 
   1   6  -6   13.67    1.29 
   1   6  -6   14.86    1.16 
   0   6  -5   18.54    1.08 
   0   6  -5   18.78    1.35 
  -1   6  -4   28.54    1.47 
  -1   6  -4   28.37    1.00 
  -1   6  -4   28.45    0.85 
  -2   6  -3   12.53    0.69 
  -2   6  -3   12.38    0.60 
  -2   6  -3   12.08    0.97 
  -3   6  -2    3.56    0.65 
  -3   6  -2    4.19    0.55 
  -4   6  -1    0.70    0.40 
  -4   6  -1    1.00    0.53 
  -5   6   0    1.88    0.56 
  -5   6   0    2.59    0.36 
  -5   6   0    2.49    0.52 
  -6   6   1   24.36    1.29 
  -6   6   1   22.55    0.87 
  -6   6   1   24.11    1.08 
  -7   6   2   21.93    1.07 
  -7   6   2   25.88    1.22 
  -7   6   2   21.82    1.20 
  -8   6   3    3.42    0.76 
  -8   6   3    2.47    0.71 
  -8   6   3    3.18    0.72 
  -9   6   4   17.67    1.30 
  -9   6   4   19.12    1.33 
  -9   6   4   20.92    1.24 
 -10   6   5   12.47    1.22 
 -10   6   5    9.83    1.04 
 -10   6   5    9.99    1.15 
 -11   6   6    0.50    0.73 
 -11   6   6   -0.22    0.64 
 -11   6   6   -1.25    0.79 
  12  -6  -7    1.32    1.12 
 -12   6   7   -0.56    0.82 
 -12   6   7   -1.12    0.90 
   9   5 -13    2.41    1.52 
   9   5 -13    3.87    1.53 
  -8  -5  12    8.81    1.50 
   8   5 -12    8.23    1.68 
   8   5 -12    8.56    1.64 
  -7  -5  11    0.33    0.90 
   7   5 -11    0.97    1.19 
   7   5 -11   -0.03    1.09 
  -6  -5  10   10.73    1.29 
   6   5 -10   12.47    1.61 
  -5  -5   9    3.67    1.04 
   5   5  -9    4.59    1.31 
  -4  -5   8    5.60    0.98 
   4   5  -8    6.32    1.33 
  -3  -5   7    0.91    0.71 
   3   5  -7    1.71    1.06 
  -2  -5   6   20.56    1.13 
   2   5  -6   16.77    1.35 
  -1  -5   5   73.96    1.58 
   1   5  -5   72.71    2.07 
   0   5  -4    0.41    0.47 
   0   5  -4    0.36    0.71 
  -1   5  -3    8.89    0.54 
  -1   5  -3    9.10    0.68 
  -1   5  -3   10.58    0.92 
  -2   5  -2    1.23    0.24 
  -2   5  -2    1.24    0.52 
  -2   5  -2    1.80    0.38 
  -3   5  -1    2.28    0.44 
  -3   5  -1    2.29    0.51 
  -4   5   0   12.48    0.74 
  -4   5   0   14.61    0.56 
  -4   5   0   12.93    0.95 
  -5   5   1   18.84    0.79 
  -5   5   1   19.59    1.00 
  -5   5   1   17.55    0.92 
  -6   5   2   28.78    1.04 
  -6   5   2   27.49    1.08 
  -6   5   2   28.73    1.27 
  -7   5   3    4.69    0.74 
  -7   5   3    3.94    0.68 
  -7   5   3    4.35    0.68 
  -8   5   4   14.52    1.11 
  -8   5   4   14.53    1.14 
  -8   5   4   15.03    1.05 
  -9   5   5   20.36    1.18 
  -9   5   5   22.20    1.41 
  -9   5   5   20.50    1.33 
 -10   5   6   -0.23    0.57 
 -10   5   6    0.04    0.68 
 -10   5   6    0.31    0.79 
 -11   5   7   -0.83    0.81 
 -11   5   7   -0.16    0.71 
  12  -5  -8    1.24    1.13 
 -12   5   8   -1.73    0.87 
  10   4 -13    5.18    1.76 
  10   4 -13    3.20    1.57 
  -9  -4  12    3.51    1.23 
   9   4 -12    5.77    1.58 
   9   4 -12    5.82    1.44 
  -8  -4  11   -0.65    0.93 
   8   4 -11   -0.46    1.09 
   8   4 -11    1.15    1.31 
  -7  -4  10    1.36    1.01 
   7   4 -10    1.02    1.10 
  -6  -4   9    2.89    1.02 
   6   4  -9    3.94    1.15 
  -5  -4   8    5.28    0.99 
   5   4  -8    7.42    1.30 
  -4  -4   7   10.62    1.07 
   4   4  -7   11.89    1.25 
  -3  -4   6    9.41    0.92 
   3   4  -6   12.09    1.17 
  -2  -4   5   46.15    1.40 
   2   4  -5   43.58    1.65 
  -1  -4   4    0.13    0.41 
   1   4  -4    0.48    0.60 
   0   4  -3   25.06    0.97 
   0   4  -3   24.14    1.22 
  -1   4  -2   49.93    1.39 
  -1   4  -2   50.27    0.96 
  -1   4  -2   48.69    0.94 
  -2   4  -1    2.08    0.19 
  -2   4  -1    2.04    0.36 
  -2   4  -1    1.40    0.47 
  -3   4   0   16.28    0.88 
  -3   4   0   17.42    0.52 
  -3   4   0   17.41    0.72 
  -4   4   1    0.61    0.32 
  -4   4   1    0.17    0.36 
  -4   4   1    1.51    0.46 
  -5   4   2   14.83    0.85 
  -5   4   2   13.43    0.80 
  -5   4   2   12.06    0.74 
  -6   4   3   50.09    1.33 
  -6   4   3   53.49    1.56 
  -6   4   3   54.15    1.44 
  -7   4   4    2.82    0.73 
  -7   4   4    2.53    0.64 
  -7   4   4    2.32    0.56 
  -8   4   5   -0.78    0.56 
  -8   4   5    0.22    0.53 
  -8   4   5   -0.32    0.65 
  -9   4   6    3.86    0.79 
  -9   4   6    5.17    0.77 
  -9   4   6    4.84    0.94 
 -10   4   7    5.88    1.11 
 -10   4   7    5.34    0.95 
 -11   4   8    2.09    1.01 
 -12   4   9    0.30    1.01 
 -10  -3  12    4.47    1.45 
  10   3 -12    5.80    1.41 
  10   3 -12    8.08    1.77 
  -9  -3  11   -0.31    0.94 
   9   3 -11    1.26    1.34 
   9   3 -11   -0.49    1.13 
  -8  -3  10    1.08    0.93 
   8   3 -10    0.29    1.01 
  -7  -3   9    3.65    1.08 
   7   3  -9    1.99    1.05 
  -6  -3   8    9.49    1.25 
   6   3  -8    7.78    1.22 
  -5  -3   7    0.91    0.80 
   5   3  -7    0.70    0.84 
  -4  -3   6    2.42    0.69 
   4   3  -6    3.29    0.84 
  -3  -3   5   36.34    1.36 
   3   3  -5   37.05    1.51 
  -2  -3   4    4.45    0.58 
   2   3  -4    2.77    0.63 
  -1  -3   3    7.10    0.57 
   1   3  -3    8.00    0.80 
   0   3  -2   12.23    0.83 
   0   3  -2   16.84    1.19 
  -1   3  -1    0.35    0.33 
  -1   3  -1    0.36    0.30 
  -1   3  -1    1.00    0.48 
  -2   3   0   69.97    0.88 
  -2   3   0   71.74    1.18 
  -2   3   0   70.64    1.40 
  -3   3   1    0.24    0.37 
  -3   3   1   -0.14    0.26 
  -3   3   1    0.19    0.31 
  -4   3   2    3.34    0.46 
  -4   3   2    2.75    0.44 
  -4   3   2    2.99    0.43 
  -5   3   3   43.15    1.14 
  -5   3   3   43.82    1.25 
  -5   3   3   43.09    1.27 
  -6   3   4    0.58    0.55 
  -6   3   4    0.41    0.41 
  -6   3   4    1.00    0.50 
  -7   3   5   -0.50    0.42 
  -7   3   5    0.60    0.56 
  -7   3   5    0.23    0.65 
  -8   3   6   -0.17    0.72 
  -8   3   6   -0.21    0.51 
  -8   3   6   -0.04    0.60 
  -9   3   7   -0.42    0.73 
  -9   3   7    0.29    0.51 
 -10   3   8    1.92    0.96 
 -11   3   9    2.20    1.07 
 -12   3  10    0.49    1.09 
  11   2 -12    2.67    1.46 
  11   2 -12    2.33    1.22 
 -10  -2  11   -1.81    0.95 
  10   2 -11    0.14    1.29 
  10   2 -11    2.07    1.09 
  -9  -2  10    0.64    1.03 
   9   2 -10   -0.66    0.92 
  -8  -2   9    5.83    1.10 
   8   2  -9    5.13    1.09 
  -7  -2   8    8.87    1.20 
  -6  -2   7    1.28    0.29 
  -6  -2   7    0.70    0.80 
  -5  -2   6   -0.76    0.58 
  -5  -2   6   -0.06    0.22 
  -4  -2   5   38.66    0.62 
  -4  -2   5   41.81    1.48 
   4   2  -5   38.06    1.46 
  -3  -2   4   19.55    0.94 
  -3  -2   4   20.81    0.39 
   3   2  -4   19.20    0.98 
  -2  -2   3    4.40    0.54 
  -2  -2   3    4.04    0.24 
   2   2  -3    3.99    0.57 
  -1  -2   2   39.00    0.92 
   1   2  -2   37.40    1.13 
   0   2  -1    0.59    0.29 
   0   2  -1    1.08    0.33 
  -1   2   0  144.20    1.72 
  -1   2   0  147.23    1.51 
  -1   2   0  146.27    1.41 
  -2   2   1    6.76    0.48 
  -2   2   1    6.90    0.50 
  -2   2   1    6.90    0.46 
  -3   2   2   47.03    0.93 
  -3   2   2   43.69    1.04 
  -3   2   2   43.28    1.02 
  -4   2   3    1.14    0.36 
  -4   2   3    0.35    0.40 
  -4   2   3    0.28    0.31 
  -5   2   4   10.95    0.81 
  -5   2   4   12.24    0.92 
  -5   2   4   12.27    0.67 
  -6   2   5    7.64    0.63 
  -6   2   5    8.43    0.90 
  -6   2   5    6.40    0.72 
  -7   2   6    2.10    0.63 
  -7   2   6    3.53    0.85 
  -7   2   6    2.25    0.54 
  -8   2   7    0.17    0.49 
  -8   2   7    0.18    0.78 
  -9   2   8    5.20    1.07 
 -10   2   9    2.66    1.06 
 -11   2  10   12.64    1.53 
 -12   2  11   -0.17    1.06 
 -11  -1  11    0.11    1.28 
  11   1 -11    4.84    1.19 
  11   1 -11    2.88    1.39 
 -10  -1  10    2.77    1.16 
  10   1 -10    2.46    1.38 
  -9  -1   9    3.67    1.07 
  -8  -1   8    5.19    1.09 
  -7  -1   7    4.84    0.49 
  -7  -1   7    3.37    1.04 
  -6  -1   6   10.91    1.14 
  -6  -1   6   11.34    0.58 
  -5  -1   5   -0.78    0.58 
  -5  -1   5    0.75    0.28 
  -4  -1   4    7.68    0.75 
  -4  -1   4    8.00    0.42 
  -3  -1   3   36.27    0.63 
  -3  -1   3   36.53    1.17 
  -2  -1   2    0.40    0.20 
  -2  -1   2    0.20    0.42 
  -1  -1   1    6.81    0.39 
   1   1  -1    6.40    0.39 
   1   1  -1    7.46    0.48 
   0   1   0   12.89    0.32 
   0   1   0   12.58    0.35 
  -1   1   1   46.96    0.67 
  -1   1   1   46.41    0.73 
  -2   1   2    0.33    0.26 
  -2   1   2   -0.01    0.32 
  -2   1   2   -0.30    0.27 
  -3   1   3   25.58    0.86 
  -3   1   3   26.88    0.66 
  -3   1   3   25.70    0.83 
  -4   1   4    0.12    0.32 
  -4   1   4    0.26    0.28 
  -4   1   4   -0.03    0.38 
  -5   1   5   -0.35    0.51 
  -5   1   5   -0.41    0.31 
  -5   1   5    0.55    0.42 
  -6   1   6    1.38    0.67 
  -6   1   6    0.90    0.40 
  -7   1   7    8.13    1.08 
  -8   1   8   15.32    1.39 
  -9   1   9    0.39    0.87 
 -10   1  10    4.87    1.17 
 -11   1  11    0.45    1.07 
  12   0 -11    3.39    1.64 
 -11   0  10    5.19    1.43 
  11   0 -10    6.82    1.56 
 -10   0   9    2.46    1.04 
  10   0  -9    4.16    1.44 
  -9   0   8    5.56    1.13 
  -8   0   7   29.38    1.01 
  -8   0   7   30.67    1.75 
  -7   0   6    9.62    1.18 
  -7   0   6    7.83    0.62 
  -6   0   5    0.39    0.71 
  -6   0   5    0.44    0.34 
  -5   0   4    3.28    0.71 
  -5   0   4    2.44    0.38 
  -4   0   3   15.02    0.94 
  -4   0   3   13.75    0.55 
  -3   0   2    8.91    0.70 
  -3   0   2    9.76    0.46 
  -2   0   1  119.27    1.22 
  -2   0   1  116.88    1.56 
  -1   0   0   12.99    0.29 
   1   0   0   12.92    0.21 
   1   0   0   13.22    0.44 
   0   0   1    0.21    0.08 
  -1   0   2   58.93    0.90 
  -2   0   3    3.98    0.47 
  -3   0   4    1.52    0.47 
  -4   0   5   37.91    1.31 
  -5   0   6   50.03    1.59 
  -6   0   7    3.19    0.78 
  -7   0   8    3.29    0.89 
  -8   0   9    9.14    1.18 
  -9   0  10    1.35    0.90 
 -10   0  11    1.05    1.08 
 -11   0  12    0.81    1.15 
  12  -1 -10    7.10    1.68 
 -11   1   9   13.64    1.63 
  11  -1  -9   15.26    1.94 
 -10   1   8    8.11    1.34 
  10  -1  -8   11.55    1.63 
  -9   1   7    0.61    0.47 
  -9   1   7    2.84    0.99 
  -8   1   6   69.18    1.55 
  -8   1   6   66.66    2.25 
  -7   1   5   -0.25    0.75 
  -7   1   5    0.44    0.45 
  -6   1   4    7.63    0.86 
  -6   1   4    7.54    0.60 
  -5   1   3    1.49    0.58 
  -5   1   3    0.89    0.38 
  -5   1   3    1.21    0.35 
  -4   1   2   69.92    1.18 
  -4   1   2   70.04    1.29 
  -4   1   2   68.46    1.44 
  -3   1   1    8.68    0.60 
  -3   1   1    8.62    0.53 
  -3   1   1    8.28    0.54 
  -2   1   0   34.47    0.64 
  -2   1   0   34.99    0.66 
   2  -1   0   34.43    0.85 
  -1   1  -1   58.67    0.73 
  -1   1  -1   59.73    0.80 
   1  -1   1   57.41    0.71 
   0   1  -2    0.50    0.12 
   0   1  -2    0.60    0.20 
   0  -1   2    0.61    0.17 
  -1  -1   3    8.29    0.56 
  -2  -1   4   12.66    0.73 
  -3  -1   5   43.40    1.24 
  -4  -1   6    0.38    0.51 
  -5  -1   7    0.16    0.62 
  -6  -1   8   25.64    1.49 
  -7  -1   9    9.01    1.19 
  -8  -1  10    0.90    0.90 
  -9  -1  11   -0.18    0.87 
 -10  -1  12    6.68    1.41 
  11   1 -13    0.14    1.07 
 -11  -1  13    0.54    1.24 
  12  -2  -9   10.48    1.84 
 -11   2   8   18.14    1.75 
  11  -2  -8   18.34    2.01 
 -10   2   7    4.03    1.11 
 -10   2   7    3.99    0.68 
  10  -2  -7    4.16    1.34 
  -9   2   6   -0.90    0.80 
  -9   2   6   -0.22    0.49 
  -8   2   5   10.94    1.15 
  -8   2   5   13.62    0.93 
  -7   2   4   15.18    0.99 
  -7   2   4   15.93    1.22 
  -7   2   4   17.17    0.91 
  -6   2   3    6.44    0.59 
  -6   2   3    7.28    0.83 
  -6   2   3    6.21    0.63 
  -5   2   2    0.97    0.36 
  -5   2   2    0.52    0.35 
  -5   2   2    0.59    0.49 
  -4   2   1    3.86    0.50 
  -4   2   1    3.64    0.42 
  -4   2   1    4.28    0.46 
  -3   2   0    6.74    0.53 
  -3   2   0    8.75    0.58 
  -3   2   0    6.20    0.46 
   3  -2   0    5.64    0.56 
  -2   2  -1    1.75    0.36 
  -2   2  -1    2.09    0.35 
   2  -2   1    1.15    0.35 
  -1   2  -2  193.26    1.85 
  -1   2  -2  193.30    2.29 
   1  -2   2  192.29    1.76 
   0   2  -3  161.69    1.49 
   0   2  -3  163.07    2.25 
   0  -2   3  164.93    1.84 
   1   2  -4   58.98    0.62 
   1   2  -4   60.34    1.53 
  -1  -2   4   59.01    1.21 
   2   2  -5   18.91    1.03 
  -2  -2   5   17.07    0.92 
  -3  -2   6  166.89    2.65 
  -4  -2   7    9.45    0.94 
  -5  -2   8    0.33    0.72 
  -6  -2   9   14.70    1.36 
  -7  -2  10    0.24    0.76 
  -8  -2  11    0.63    0.93 
   9   2 -12    7.38    1.34 
  -9  -2  12    5.72    1.31 
  10   2 -13    6.71    1.44 
 -10  -2  13    5.59    1.40 
  12  -3  -8    3.82    1.41 
 -11   3   7   11.90    1.04 
 -11   3   7    9.26    1.40 
  11  -3  -7    9.52    1.58 
 -10   3   6    4.09    1.04 
 -10   3   6    5.08    0.75 
  10  -3  -6    3.45    1.17 
  -9   3   5    0.21    0.53 
  -9   3   5    1.14    0.84 
  -9   3   5    1.06    0.66 
  -8   3   4    4.54    0.69 
  -8   3   4    7.26    1.00 
  -8   3   4    4.52    0.69 
  -7   3   3    5.37    0.83 
  -7   3   3    6.82    0.71 
  -7   3   3    4.66    0.62 
  -6   3   2   10.91    0.78 
  -6   3   2   11.69    0.88 
  -6   3   2   11.45    0.76 
  -5   3   1    6.95    0.61 
  -5   3   1    6.82    0.59 
  -5   3   1    7.10    0.58 
  -4   3   0   24.67    0.85 
  -4   3   0   25.34    0.81 
  -4   3   0   25.47    0.86 
   4  -3   0   26.51    0.93 
  -3   3  -1   45.33    1.08 
  -3   3  -1   47.44    1.01 
   3  -3   1   45.91    0.91 
  -2   3  -2   74.34    1.47 
  -2   3  -2   75.26    1.19 
   2  -3   2   74.08    0.78 
  -1   3  -3    0.45    0.29 
  -1   3  -3    0.53    0.63 
   1  -3   3   -0.02    0.24 
   0   3  -4   33.98    1.31 
   0   3  -4   33.20    0.64 
   0  -3   4   33.11    0.83 
   1   3  -5    7.44    0.80 
   1   3  -5    8.22    0.30 
  -1  -3   5    9.34    0.70 
   2   3  -6   32.72    1.39 
  -2  -3   6   33.98    1.20 
   3   3  -7    6.48    0.93 
  -3  -3   7    6.81    0.77 
   4   3  -8    0.58    0.77 
  -4  -3   8    0.44    0.68 
   5   3  -9    3.35    1.09 
  -5  -3   9    3.91    0.89 
   6   3 -10    4.33    1.11 
  -6  -3  10    3.73    1.00 
   7   3 -11    0.86    1.06 
  -7  -3  11    0.27    0.91 
   8   3 -12    0.48    1.01 
  -8  -3  12    0.67    1.02 
   9   3 -13    5.75    1.39 
  -9  -3  13    6.25    1.35 
  10   3 -14    3.66    1.44 
 -10  -3  14    0.68    1.22 
  13  -4  -8    3.95    1.60 
  12  -4  -7    3.37    1.37 
 -11   4   6    5.67    0.85 
  11  -4  -6    5.27    1.40 
 -10   4   5   -0.39    0.81 
 -10   4   5   -0.14    0.63 
 -10   4   5    0.39    0.54 
  10  -4  -5    1.35    1.03 
  -9   4   4    8.77    0.87 
  -9   4   4    7.54    0.88 
  -9   4   4    9.61    1.11 
   9  -4  -4    9.70    1.37 
  -8   4   3   12.40    1.09 
  -8   4   3   11.10    0.92 
  -8   4   3   11.21    0.94 
   8  -4  -3   12.15    1.29 
  -7   4   2    1.05    0.50 
  -7   4   2    1.47    0.54 
  -7   4   2    1.06    0.59 
  -6   4   1   70.02    1.60 
  -6   4   1   71.96    1.60 
  -6   4   1   69.11    1.52 
   6  -4  -1   69.82    1.76 
  -5   4   0   83.26    1.62 
  -5   4   0   84.71    1.68 
   5  -4   0   84.51    1.66 
  -4   4  -1    7.52    0.57 
  -4   4  -1    6.87    0.60 
   4  -4   1    7.13    0.51 
  -3   4  -2    5.62    0.49 
  -3   4  -2    5.00    0.56 
  -2   4  -3    7.80    0.55 
  -2   4  -3    6.81    0.69 
  -1   4  -4  205.55    2.17 
  -1   4  -4  204.56    3.06 
   1  -4   4  207.33    2.17 
   0   4  -5   90.36    1.18 
   0   4  -5   91.99    2.07 
   0  -4   5   90.49    1.48 
   1   4  -6    3.50    0.26 
   1   4  -6    4.75    0.81 
  -1  -4   6    3.38    0.55 
   2   4  -7    8.98    1.00 
  -2  -4   7   11.20    0.87 
   3   4  -8    7.76    1.12 
  -3  -4   8   10.02    0.98 
   4   4  -9    3.14    1.10 
  -4  -4   9    2.94    0.79 
   5   4 -10   14.08    1.54 
  -5  -4  10   14.01    1.29 
   6   4 -11    9.94    1.49 
  -6  -4  11    7.84    1.20 
   7   4 -12    7.46    1.46 
  -7  -4  12    7.17    1.30 
   8   4 -13    4.90    1.39 
  -8  -4  13    5.99    1.35 
   9   4 -14    7.20    1.60 
  -9  -4  14    8.89    1.58 
  13  -5  -7    2.72    1.35 
 -12   5   6    1.33    0.73 
  12  -5  -6    1.62    1.22 
 -11   5   5    1.76    0.74 
 -11   5   5    3.20    0.74 
  11  -5  -5    2.76    1.17 
 -10   5   4    4.64    0.84 
 -10   5   4    4.78    0.80 
  10  -5  -4    4.24    1.18 
  -9   5   3    8.22    0.90 
  -9   5   3    8.89    0.94 
   9  -5  -3   10.00    1.25 
  -8   5   2    3.92    0.74 
  -8   5   2    1.37    0.63 
   8  -5  -2    3.26    0.96 
  -7   5   1    9.17    0.81 
  -7   5   1    8.86    0.83 
   7  -5  -1    9.52    1.01 
  -6   5   0   69.04    1.64 
  -6   5   0   68.58    1.69 
   6  -5   0   68.64    1.62 
  -5   5  -1   50.15    1.35 
  -5   5  -1   50.57    1.43 
   5  -5   1   51.92    1.16 
  -4   5  -2    4.73    0.60 
  -4   5  -2    4.47    0.53 
  -3   5  -3   42.70    1.12 
  -3   5  -3   44.53    1.43 
  -2   5  -4   30.03    0.88 
  -2   5  -4   29.33    1.28 
   2  -5   4   29.72    0.57 
  -1   5  -5    4.44    0.42 
  -1   5  -5    4.20    0.86 
   1  -5   5    4.55    0.43 
   0   5  -6    0.79    0.29 
   0   5  -6    0.48    0.73 
   0  -5   6   -0.03    0.39 
   1   5  -7    6.00    0.37 
   1   5  -7    7.10    1.08 
  -1  -5   7    7.27    0.73 
   2   5  -8   12.73    1.36 
  -2  -5   8   13.56    1.05 
   3   5  -9    2.31    1.17 
  -3  -5   9    2.50    0.78 
   4   5 -10   14.09    1.67 
  -4  -5  10   12.42    1.24 
   5   5 -11   12.03    1.65 
  -5  -5  11   12.17    1.27 
   6   5 -12    8.95    1.50 
  -6  -5  12   10.20    1.37 
   7   5 -13   -0.61    1.24 
  -7  -5  13    1.29    0.99 
   8   5 -14    7.39    1.65 
  -8  -5  14    7.56    1.46 
 -13   6   6    1.12    0.79 
 -12   6   5    0.80    0.74 
 -12   6   5   -0.14    0.73 
 -11   6   4    4.38    0.85 
 -11   6   4    5.46    0.94 
  11  -6  -4    8.54    1.36 
 -10   6   3    2.24    0.73 
 -10   6   3    4.29    0.81 
  10  -6  -3    4.32    1.08 
  -9   6   2    8.58    0.94 
  -9   6   2    7.83    0.92 
   9  -6  -2    8.60    1.14 
  -8   6   1    1.54    0.62 
  -8   6   1    1.47    0.66 
   8  -6  -1    0.10    0.79 
  -7   6   0   36.30    1.44 
  -7   6   0   34.45    1.31 
   7  -6   0   34.99    1.40 
  -6   6  -1   33.95    1.35 
  -6   6  -1   31.93    1.18 
   6  -6   1   30.57    1.10 
  -5   6  -2   10.98    0.82 
  -5   6  -2   11.88    0.93 
  -4   6  -3   12.97    0.81 
  -4   6  -3   11.81    0.94 
  -3   6  -4   21.00    1.19 
  -3   6  -4   19.00    0.85 
  -2   6  -5   35.95    0.99 
  -2   6  -5   36.74    1.68 
   2  -6   5   34.14    0.76 
  -1   6  -6    2.99    0.89 
  -1   6  -6    2.92    0.41 
   1  -6   6    3.67    0.47 
   0   6  -7   17.72    0.64 
   0   6  -7   19.26    1.44 
   0  -6   7   16.50    0.90 
   1   6  -8   15.57    1.46 
  -1  -6   8   15.05    0.99 
   2   6  -9   -0.35    1.17 
  -2  -6   9    0.27    0.65 
   3   6 -10    6.63    1.45 
  -3  -6  10    8.10    1.05 
   4   6 -11   45.13    2.77 
  -4  -6  11   43.39    1.89 
   5   6 -12   23.94    2.15 
  -5  -6  12   28.29    1.80 
   6   6 -13   -1.20    1.37 
  -6  -6  13   -0.14    0.98 
   7   6 -14    7.27    1.68 
  -7  -6  14    7.80    1.44 
   8   6 -15    8.04    1.94 
  -8  -6  15    4.75    1.33 
 -13   7   5    1.09    0.86 
 -12   7   4    1.14    0.74 
 -12   7   4   -0.21    0.72 
 -11   7   3   10.45    1.11 
 -11   7   3   10.84    1.17 
 -10   7   2    1.87    0.69 
 -10   7   2    1.23    0.74 
  -9   7   1    0.66    0.61 
  -9   7   1    0.28    0.60 
  -8   7   0   23.48    1.32 
  -8   7   0   25.16    1.31 
  -7   7  -1   10.77    0.99 
  -7   7  -1   11.13    1.01 
  -6   7  -2    8.26    0.90 
  -6   7  -2    7.51    0.79 
  -5   7  -3    0.52    0.60 
  -5   7  -3    0.95    0.52 
  -4   7  -4   25.74    1.02 
  -4   7  -4   27.89    1.38 
  -3   7  -5   24.03    0.97 
  -3   7  -5   25.08    1.45 
  -2   7  -6    8.29    0.67 
  -2   7  -6    8.06    1.14 
   2  -7   6    8.12    0.54 
  -1   7  -7   31.76    0.94 
  -1   7  -7   30.35    1.86 
   1  -7   7   29.48    1.06 
   0   7  -8   17.23    1.58 
   0   7  -8   22.67    0.75 
   0  -7   8   22.99    1.11 
   1   7  -9    0.91    1.14 
  -1  -7   9    0.68    0.64 
   2   7 -10    0.56    1.30 
  -2  -7  10    0.93    0.78 
   3   7 -11    1.06    1.30 
  -3  -7  11    0.24    0.78 
   4   7 -12   10.64    1.73 
  -4  -7  12   10.17    1.28 
   5   7 -13    3.30    1.52 
  -5  -7  13    1.45    0.99 
   6   7 -14    0.40    1.53 
  -6  -7  14   -0.06    0.99 
   7   7 -15    5.44    1.85 
  -7  -7  15    1.60    1.23 
 -13   8   4    2.86    0.95 
 -12   8   3    2.32    0.77 
 -12   8   3    1.66    0.84 
 -11   8   2    7.96    1.09 
 -11   8   2    5.49    0.98 
 -10   8   1    5.77    0.98 
 -10   8   1    4.86    0.86 
  -9   8   0    3.55    0.79 
  -9   8   0    2.52    0.75 
  -8   8  -1    5.51    0.87 
  -8   8  -1    4.58    0.82 
  -7   8  -2   20.47    1.38 
  -7   8  -2   19.17    1.25 
  -6   8  -3   10.42    1.05 
  -6   8  -3    9.84    0.91 
  -5   8  -4   16.95    1.06 
  -5   8  -4   13.97    1.16 
  -4   8  -5   52.98    1.52 
  -4   8  -5   55.27    2.07 
  -3   8  -6    4.98    0.64 
  -3   8  -6    6.88    1.14 
  -2   8  -7    1.88    1.07 
  -2   8  -7    1.90    0.55 
  -2   8  -7    1.90    0.50 
  -1   8  -8   19.62    1.68 
  -1   8  -8   20.39    0.84 
   1  -8   8   18.73    1.02 
   0   8  -9    4.84    0.51 
   0   8  -9    3.42    1.29 
   0  -8   9    5.28    0.82 
   1   8 -10   19.68    1.97 
  -1  -8  10   18.59    1.28 
   2   8 -11    3.44    1.34 
  -2  -8  11    0.47    0.80 
   3   8 -12    4.70    1.50 
  -3  -8  12    5.88    1.09 
   4   8 -13    7.23    1.71 
  -4  -8  13    9.76    1.30 
   5   8 -14    5.49    1.72 
  -5  -8  14   -0.08    0.98 
   6   8 -15    8.95    2.10 
   6   8 -15    5.71    1.61 
  -6  -8  15    2.02    1.21 
 -12   9   2    0.64    0.76 
 -12   9   2    0.42    0.79 
 -11   9   1    6.09    1.04 
 -11   9   1    5.02    0.99 
 -10   9   0    4.07    0.93 
 -10   9   0    4.98    0.94 
  -9   9  -1    0.63    0.71 
  -9   9  -1    0.75    0.62 
  -8   9  -2    0.71    0.69 
  -8   9  -2    1.04    0.68 
  -7   9  -3   30.39    1.44 
  -7   9  -3   29.16    1.61 
  -6   9  -4    2.15    0.70 
  -6   9  -4    2.93    0.84 
  -5   9  -5    2.54    0.63 
  -5   9  -5    2.72    0.96 
  -4   9  -6   12.74    1.30 
  -4   9  -6   12.19    0.94 
  -3   9  -7    7.96    1.34 
  -3   9  -7    9.42    0.82 
  -2   9  -8   -0.27    0.42 
  -2   9  -8    1.08    1.10 
  -1   9  -9    0.10    0.41 
  -1   9  -9   -0.01    1.11 
  -1   9  -9    0.32    0.71 
   0   9 -10    4.44    1.38 
   0  -9  10    3.93    0.80 
   1   9 -11    3.52    1.39 
  -1  -9  11    1.22    0.80 
   2   9 -12    0.53    1.35 
  -2  -9  12    0.83    0.84 
   3   9 -13    3.68    1.56 
  -3  -9  13    4.68    1.10 
   4   9 -14    1.35    1.60 
   4   9 -14    4.53    1.35 
  -4  -9  14    2.82    1.06 
   5   9 -15    4.78    1.47 
   5   9 -15    2.29    1.84 
  -5  -9  15    4.59    1.27 
 -12  10   1    1.10    0.89 
 -12  10   1    0.19    0.74 
 -11  10   0    0.83    0.74 
 -11  10   0    1.28    0.82 
 -10  10  -1    0.62    0.75 
 -10  10  -1   -0.43    0.68 
  -9  10  -2    1.92    0.79 
  -9  10  -2    1.30    0.80 
  -8  10  -3    2.10    0.84 
  -8  10  -3    2.97    0.80 
  -7  10  -4    1.70    0.84 
  -7  10  -4    0.93    0.67 
  -6  10  -5    0.24    0.59 
  -6  10  -5    0.41    0.83 
  -5  10  -6    4.00    1.06 
  -5  10  -6    3.18    0.69 
  -4  10  -7    0.34    0.88 
  -4  10  -7    0.38    0.52 
  -3  10  -8   -0.25    0.97 
  -3  10  -8   -0.41    0.44 
  -2  10  -9    0.09    0.45 
  -2  10  -9    0.17    1.18 
  -1  10 -10   -1.55    1.17 
   0  10 -11    3.44    1.39 
   1  10 -12    1.27    1.40 
   1  10 -12    4.75    1.09 
   2  10 -13    2.58    1.09 
   2  10 -13   -0.73    1.42 
  -2 -10  13   -1.08    0.92 
   3  10 -14    3.06    1.25 
   3  10 -14    1.37    1.72 
  -3 -10  14    0.49    1.01 
   4  10 -15    9.81    1.67 
   4  10 -15    9.30    2.18 
 -12  11   0    2.93    1.02 
 -12  11   0    4.36    1.11 
 -11  11  -1    0.04    0.81 
 -11  11  -1   -0.14    0.68 
 -10  11  -2    0.91    0.84 
 -10  11  -2    0.34    0.71 
  -9  11  -3   -0.42    0.61 
  -9  11  -3    0.43    0.80 
  -8  11  -4   -1.10    0.76 
  -8  11  -4   -0.26    0.67 
  -7  11  -5    0.59    0.66 
  -7  11  -5    0.17    0.84 
  -6  11  -6   -0.19    0.87 
  -6  11  -6    1.28    0.60 
  -5  11  -7    0.44    0.97 
  -5  11  -7    1.09    0.59 
  -4  11  -8    0.41    0.53 
  -4  11  -8    0.18    0.92 
  -3  11  -9    0.43    0.49 
  -3  11  -9    0.03    1.12 
  -2  11 -10    4.48    1.32 
  -2  11 -10    3.64    0.61 
  -1  11 -11    1.60    1.24 
   0  11 -12   -0.74    1.41 
   1  11 -13   -0.35    1.48 
   2  11 -14    0.61    1.59 
   3  11 -15    3.61    1.91 
 -11  12  -2    1.46    0.94 
 -11  12  -2    3.36    1.01 
 -10  12  -3   -0.66    0.81 
 -10  12  -3    0.17    0.78 
  -9  12  -4    0.29    0.73 
  -9  12  -4    0.12    0.91 
  -8  12  -5   -0.21    0.88 
  -8  12  -5   -0.66    0.57 
  -7  12  -6    0.35    0.65 
  -7  12  -6   -0.74    0.91 
  -6  12  -7    0.32    0.61 
  -6  12  -7    0.06    0.97 
  -5  12  -8   -0.08    1.04 
  -5  12  -8    1.04    0.62 
  -4  12  -9    2.23    1.10 
  -4  12  -9    0.58    0.60 
  -3  12 -10    1.59    0.59 
  -3  12 -10    0.12    1.16 
  -2  12 -11   -0.80    1.26 
  -1  12 -12    0.36    1.27 
   0  12 -13    0.29    1.54 
   1  12 -14   -0.90    1.66 
 -10  13  -4    2.00    1.02 
 -10  13  -4    1.71    0.85 
  -9  13  -5    6.01    1.29 
  -9  13  -5    5.20    0.99 
  -8  13  -6   -0.75    0.97 
  -8  13  -6   -0.02    0.70 
  -7  13  -7   -0.30    1.01 
  -7  13  -7   -0.19    0.64 
  -6  13  -8    0.40    0.63 
  -6  13  -8   -1.34    0.97 
  -5  13  -9   -0.17    1.12 
  -5  13  -9    0.40    0.61 
  -4  13 -10    1.05    1.14 
  -4  13 -10    1.99    0.65 
  -3  13 -11   -1.74    1.03 
  -2  13 -12    0.19    1.44 
  -1  13 -13   -1.04    1.44 
   0  13 -14   -1.49    1.48 
  -9  14  -6    0.80    1.11 
  -9  14  -6    0.25    0.81 
  -8  14  -7    0.93    1.17 
  -8  14  -7    3.40    0.87 
  -7  14  -8   -0.53    1.09 
  -7  14  -8    0.47    0.72 
  -6  14  -9    3.22    0.84 
  -6  14  -9    3.59    1.34 
  -5  14 -10    6.20    1.55 
  -4  14 -11   -2.40    1.08 
  -3  14 -12    2.83    1.55 
  -4  15  -9   -0.08    1.24 
  -5  15  -8    0.18    1.25 
  -6  15  -7    2.55    1.33 
  -7  15  -6    2.97    1.29 
  -1  14 -11    0.72    1.32 
  -2  14 -10    2.06    1.37 
  -3  14  -9    3.78    1.39 
  -4  14  -8    0.87    1.19 
  -5  14  -7    0.53    1.11 
  -6  14  -6    1.62    1.12 
  -7  14  -5    0.84    1.03 
  -8  14  -4    1.13    1.13 
  -9  14  -3   -0.10    0.99 
   1  13 -12    0.38    1.40 
   0  13 -11   -1.50    1.21 
  -1  13 -10   -1.11    1.11 
  -2  13  -9   10.23    1.55 
  -3  13  -8    2.89    1.15 
  -4  13  -7    1.47    1.07 
  -5  13  -6    6.13    1.24 
  -6  13  -5    0.57    1.01 
  -7  13  -4   -0.51    0.92 
  -8  13  -3    1.01    0.97 
  -9  13  -2    0.47    0.97 
 -10  13  -1    1.79    1.07 
   3  12 -13    0.04    1.73 
   2  12 -12    1.92    1.49 
   1  12 -11   -0.31    1.41 
   0  12 -10   -3.24    1.18 
  -1  12  -9    1.25    1.29 
  -2  12  -8   -0.12    1.07 
  -3  12  -7    0.27    1.06 
  -4  12  -6    0.21    0.99 
  -5  12  -5    4.78    1.11 
  -6  12  -4   -0.97    0.85 
  -7  12  -3    4.28    1.10 
  -8  12  -2    1.86    0.99 
  -9  12  -1    2.21    0.93 
 -10  12   0    0.98    0.93 
 -11  12   1   -0.68    0.86 
   4  11 -13    1.63    1.76 
   4  11 -13    1.74    1.29 
   3  11 -12   -2.36    1.43 
   3  11 -12    2.03    1.20 
   2  11 -11   -1.18    1.33 
   1  11 -10   -0.89    1.28 
   0  11  -9    6.17    1.40 
  -1  11  -8    4.56    1.27 
  -2  11  -7    0.12    0.93 
  -3  11  -6    0.29    0.97 
  -4  11  -5   11.08    1.35 
  -5  11  -4    4.93    1.09 
  -6  11  -3    0.00    0.63 
  -6  11  -3    0.42    0.85 
  -7  11  -2   11.64    1.14 
  -7  11  -2   11.03    1.27 
  -8  11  -1    2.06    0.86 
  -8  11  -1    0.71    0.71 
  -9  11   0   -0.11    0.74 
  -9  11   0   -0.08    0.68 
 -10  11   1    0.98    0.87 
 -11  11   2    2.52    1.04 
   5  10 -13    1.58    1.76 
   5  10 -13    4.62    1.59 
   4  10 -12    0.45    1.24 
   4  10 -12   -0.74    1.52 
   3  10 -11    2.88    1.28 
   3  10 -11    0.86    1.51 
   2  10 -10    2.66    1.12 
   2  10 -10    2.15    1.46 
   1  10  -9    0.90    1.26 
   1  10  -9   -0.10    0.86 
   0  10  -8    8.78    1.12 
   0  10  -8    8.82    1.45 
  -1  10  -7    5.62    1.25 
  -2  10  -6   11.39    1.43 
  -3  10  -5    0.65    0.96 
  -4  10  -4    0.24    0.82 
  -5  10  -3   18.17    1.51 
  -5  10  -3   16.96    1.15 
  -6  10  -2    0.38    0.73 
  -6  10  -2    0.75    0.60 
  -7  10  -1   43.59    1.90 
  -7  10  -1   47.71    1.80 
  -8  10   0   -0.15    0.58 
  -8  10   0    0.04    0.70 
  -9  10   1    3.32    0.85 
  -9  10   1    1.59    0.86 
 -10  10   2    1.32    0.84 
 -10  10   2    0.18    0.69 
 -11  10   3   -0.70    0.80 
 -12  10   4   -0.67    0.86 
   6   9 -13    2.10    1.36 
   6   9 -13    2.81    1.75 
   5   9 -12    0.00    1.52 
   5   9 -12    2.63    1.28 
   4   9 -11    0.36    1.12 
   4   9 -11   -1.17    1.29 
   3   9 -10    1.17    1.04 
   3   9 -10   -0.98    1.31 
   2   9  -9   -0.12    0.95 
   2   9  -9    1.84    1.31 
   1   9  -8   11.91    1.29 
   1   9  -8   13.60    1.61 
   0   9  -7   -0.87    1.17 
   0   9  -7    1.00    0.84 
  -1   9  -6    7.95    1.29 
  -1   9  -6    9.27    0.99 
  -2   9  -5    0.32    0.86 
  -2   9  -5    0.88    0.60 
  -3   9  -4    2.63    0.96 
  -4   9  -3    0.01    0.53 
  -4   9  -3    0.54    0.76 
  -5   9  -2   -0.09    0.71 
  -5   9  -2   -0.56    0.57 
  -6   9  -1   36.26    1.72 
  -6   9  -1   38.36    1.51 
  -7   9   0    0.11    0.56 
  -7   9   0   -0.83    0.68 
  -8   9   1   21.29    1.37 
  -8   9   1   21.53    1.50 
  -9   9   2    3.83    0.88 
  -9   9   2    4.45    0.88 
 -10   9   3    0.59    0.72 
 -10   9   3    0.37    0.79 
 -11   9   4    0.75    0.80 
 -12   9   5   -0.33    0.85 
   7   8 -13    0.29    1.36 
   7   8 -13    0.67    1.67 
   6   8 -12    0.88    1.13 
   6   8 -12   -0.13    1.49 
   5   8 -11   -0.14    1.41 
   5   8 -11    0.97    1.19 
   4   8 -10   14.65    1.70 
   4   8 -10   15.31    1.92 
   3   8  -9   -0.51    1.28 
   3   8  -9   -0.49    0.95 
   2   8  -8   12.21    1.63 
   2   8  -8   14.54    1.49 
   1   8  -7   -0.56    1.08 
   1   8  -7    0.84    0.92 
   0   8  -6   20.24    1.65 
   0   8  -6   18.97    1.48 
  -1   8  -5   -0.06    0.67 
  -1   8  -5   -0.82    0.91 
  -2   8  -4    2.69    0.82 
  -2   8  -4    2.61    0.57 
  -3   8  -3    0.24    0.47 
  -3   8  -3    0.39    0.70 
  -4   8  -2    1.01    0.75 
  -4   8  -2    0.64    0.49 
  -5   8  -1    3.16    0.76 
  -5   8  -1    2.75    0.65 
  -6   8   0    1.54    0.75 
  -6   8   0   -0.51    0.51 
  -7   8   1    6.24    0.93 
  -7   8   1    5.96    0.83 
  -8   8   2    1.50    0.70 
  -8   8   2    0.20    0.61 
  -9   8   3    1.73    0.72 
  -9   8   3    2.03    0.79 
 -10   8   4    3.69    0.85 
 -10   8   4    4.47    0.99 
 -11   8   5    1.71    0.86 
 -12   8   6    0.67    0.83 
   8   7 -13    3.67    1.60 
   8   7 -13    1.19    1.68 
   7   7 -12   -0.31    1.46 
   7   7 -12    3.00    1.44 
   6   7 -11    1.71    1.30 
   6   7 -11   -1.21    1.22 
   5   7 -10   16.02    1.78 
   5   7 -10   16.78    1.91 
   4   7  -9   28.13    2.08 
   4   7  -9   33.28    2.52 
   3   7  -8    1.91    1.31 
   3   7  -8    0.26    1.00 
   2   7  -7    1.06    1.19 
   2   7  -7    0.45    0.89 
   1   7  -6    3.31    0.86 
   1   7  -6    2.78    1.14 
   0   7  -5   31.59    1.71 
   0   7  -5   28.71    1.36 
  -1   7  -4   48.90    1.97 
  -1   7  -4   52.69    1.45 
  -2   7  -3   14.79    0.76 
  -2   7  -3   15.55    1.20 
  -3   7  -2   31.45    1.37 
  -3   7  -2   32.34    1.13 
  -4   7  -1    9.11    0.79 
  -4   7  -1    8.04    0.87 
  -5   7   0    1.41    0.34 
  -5   7   0    1.73    0.65 
  -5   7   0    0.25    0.46 
  -6   7   1   16.60    1.03 
  -6   7   1   16.94    0.78 
  -6   7   1   19.67    1.31 
  -7   7   2   11.48    0.98 
  -7   7   2   12.52    0.87 
  -7   7   2   10.38    1.07 
  -8   7   3    0.75    0.70 
  -8   7   3   -0.02    0.61 
  -8   7   3    0.67    0.59 
  -9   7   4    5.79    1.00 
  -9   7   4    6.89    0.91 
  -9   7   4    6.66    0.87 
 -10   7   5    2.75    0.91 
 -10   7   5    4.30    0.92 
 -11   7   6    4.60    0.99 
 -12   7   7    0.60    0.80 
   9   6 -13    0.38    1.55 
   9   6 -13    4.10    1.73 
   8   6 -12    5.62    1.61 
   8   6 -12    4.82    1.62 
   7   6 -11    2.50    1.28 
   7   6 -11    3.54    1.47 
   6   6 -10    0.79    1.30 
   6   6 -10    1.64    1.10 
   5   6  -9   10.46    1.60 
   5   6  -9    9.99    1.49 
  -4  -6   8   27.19    1.55 
   4   6  -8   30.23    2.05 
   4   6  -8   28.03    2.06 
   3   6  -7   17.87    1.49 
   3   6  -7   22.98    1.78 
   2   6  -6    1.78    1.02 
   2   6  -6    0.81    0.76 
   1   6  -5   21.52    1.37 
   1   6  -5   20.75    1.53 
   0   6  -4   27.48    1.22 
   0   6  -4   24.96    1.44 
  -1   6  -3   15.68    0.93 
  -1   6  -3   15.12    1.15 
  -2   6  -2   39.90    1.08 
  -2   6  -2   39.79    1.42 
  -2   6  -2   39.13    0.89 
  -3   6  -1    0.05    0.20 
  -3   6  -1   -0.40    0.38 
  -3   6  -1   -0.10    0.52 
  -4   6   0    0.54    0.26 
  -4   6   0    0.01    0.39 
  -4   6   0    0.14    0.47 
  -5   6   1   20.31    0.98 
  -5   6   1   22.27    1.14 
  -5   6   1   20.92    0.78 
  -6   6   2   19.95    1.22 
  -6   6   2   20.79    0.94 
  -6   6   2   24.33    1.16 
  -7   6   3   17.94    1.13 
  -7   6   3   19.85    1.23 
  -7   6   3   19.33    1.09 
  -8   6   4    5.28    0.92 
  -8   6   4    6.16    0.86 
  -8   6   4    6.68    0.87 
  -9   6   5   14.64    1.15 
  -9   6   5   12.15    1.16 
  -9   6   5   13.95    1.16 
 -10   6   6    6.47    1.00 
 -10   6   6   11.02    1.18 
 -11   6   7    2.75    0.89 
 -11   6   7    4.69    1.05 
 -12   6   8    0.10    0.86 
 -12   6   8   -0.10    0.95 
   9   5 -12   13.14    2.07 
   9   5 -12   13.92    1.90 
   8   5 -11   14.70    1.85 
   8   5 -11   13.32    1.92 
  -7  -5  10   -0.59    0.90 
   7   5 -10    0.00    1.16 
   7   5 -10    2.85    1.27 
  -6  -5   9    1.92    0.94 
   6   5  -9    2.26    1.24 
   6   5  -9    4.23    1.25 
  -5  -5   8   20.44    1.59 
   5   5  -8   19.74    1.77 
   5   5  -8   19.36    1.72 
  -4  -5   7   17.76    1.41 
   4   5  -7   19.12    1.56 
   4   5  -7   18.46    1.53 
  -3  -5   6   18.08    1.24 
   3   5  -6   17.52    1.37 
   3   5  -6   16.12    1.38 
   2   5  -5   12.46    1.20 
   2   5  -5   13.25    1.10 
   1   5  -4   39.84    1.43 
   1   5  -4   37.86    1.57 
   0   5  -3    8.67    0.86 
   0   5  -3    9.77    0.74 
  -1   5  -2    5.74    0.72 
  -1   5  -2    4.66    0.52 
  -2   5  -1   17.41    0.75 
  -2   5  -1   17.96    0.96 
  -2   5  -1   17.98    0.60 
  -3   5   0   21.66    1.00 
  -3   5   0   21.82    0.88 
  -3   5   0   20.43    0.57 
  -4   5   1   40.78    0.92 
  -4   5   1   42.03    1.37 
  -4   5   1   39.38    1.18 
  -5   5   2   44.62    1.12 
  -5   5   2   43.87    1.26 
  -5   5   2   46.19    1.43 
  -6   5   3   58.62    1.75 
  -6   5   3   59.60    1.58 
  -6   5   3   59.18    1.48 
  -7   5   4   13.78    1.08 
  -7   5   4   10.82    0.94 
  -7   5   4   11.51    0.93 
  -8   5   5   -0.44    0.62 
  -8   5   5    0.85    0.60 
  -8   5   5    0.98    0.69 
  -9   5   6   18.47    1.35 
  -9   5   6   18.15    1.28 
 -10   5   7    5.82    1.04 
 -10   5   7    5.69    0.98 
 -11   5   8    0.59    0.82 
 -11   5   8    1.47    0.95 
 -12   5   9    3.66    1.17 
  10   4 -12    5.45    1.64 
  10   4 -12    4.05    1.54 
   9   4 -11    8.36    1.76 
   9   4 -11   11.08    1.62 
  -8  -4  10    1.29    1.04 
   8   4 -10    3.18    1.37 
   8   4 -10    3.42    1.23 
  -7  -4   9    5.17    1.18 
   7   4  -9    4.98    1.24 
   7   4  -9    5.51    1.37 
  -6  -4   8    8.56    1.23 
   6   4  -8    8.50    1.49 
   6   4  -8    7.94    1.34 
  -5  -4   7   42.03    1.76 
   5   4  -7   41.92    2.10 
   5   4  -7   37.54    2.17 
  -4  -4   6   23.54    1.30 
   4   4  -6   22.93    1.70 
   4   4  -6   24.70    1.74 
  -3  -4   5    0.86    0.57 
  -3  -4   5    1.01    0.21 
   3   4  -5    0.23    0.78 
   3   4  -5   -0.33    0.65 
   2   4  -4  172.29    2.94 
   2   4  -4  173.35    2.90 
   1   4  -3   28.76    1.38 
   1   4  -3   28.79    1.18 
   0   4  -2   29.09    1.05 
   0   4  -2   27.59    1.26 
  -1   4  -1   36.13    0.90 
  -1   4  -1   35.11    1.15 
  -2   4   0   25.13    0.63 
  -2   4   0   23.66    1.01 
  -2   4   0   24.63    0.77 
  -3   4   1    7.26    0.56 
  -3   4   1    7.31    0.62 
  -3   4   1    8.01    0.49 
  -4   4   2    9.49    0.62 
  -4   4   2    9.87    0.75 
  -4   4   2    8.53    0.64 
  -5   4   3  125.83    2.30 
  -5   4   3  126.55    2.05 
  -5   4   3  122.63    2.02 
  -6   4   4   19.83    1.17 
  -6   4   4   18.73    1.09 
  -6   4   4   18.16    0.90 
  -7   4   5    3.93    0.77 
  -7   4   5    3.26    0.62 
  -7   4   5    2.96    0.77 
  -8   4   6    2.88    0.77 
  -8   4   6    5.99    0.95 
  -9   4   7    3.71    0.78 
  -9   4   7    5.03    0.93 
 -10   4   8    4.77    0.99 
 -10   4   8    6.89    1.09 
 -11   4   9    0.39    0.90 
 -12   4  10    2.35    1.17 
  10   3 -11    6.23    1.40 
  10   3 -11    6.91    1.75 
   9   3 -10    7.14    1.62 
   9   3 -10    4.60    1.27 
  -8  -3   9    5.25    1.23 
   8   3  -9    7.90    1.28 
   8   3  -9    9.03    1.50 
  -7  -3   8    3.34    0.98 
   7   3  -8    1.38    1.01 
   7   3  -8    2.30    1.21 
  -6  -3   7   15.10    1.35 
   6   3  -7   15.80    1.43 
  -5  -3   6   27.78    0.56 
  -5  -3   6   27.20    1.43 
   5   3  -6   28.00    1.62 
  -4  -3   5   23.41    1.21 
  -4  -3   5   25.50    0.52 
   4   3  -5   25.40    1.40 
  -3  -3   4   32.50    0.56 
  -3  -3   4   32.37    1.20 
   3   3  -4   33.76    1.40 
   3   3  -4   33.65    1.43 
   2   3  -3  180.29    2.81 
   2   3  -3  180.74    2.70 
   1   3  -2   10.04    0.77 
   1   3  -2    9.85    0.81 
   0   3  -1   -0.71    0.51 
   0   3  -1    0.83    0.55 
  -1   3   0   90.12    1.56 
  -1   3   0   90.10    1.29 
  -2   3   1  129.89    1.58 
  -2   3   1  133.05    1.95 
  -3   3   2    0.56    0.36 
  -3   3   2    0.30    0.35 
  -3   3   2    0.36    0.33 
  -4   3   3   77.99    1.53 
  -4   3   3   79.11    1.67 
  -4   3   3   78.91    1.45 
  -5   3   4   65.23    1.40 
  -5   3   4   67.58    1.58 
  -5   3   4   68.03    1.66 
  -6   3   5    1.39    0.56 
  -6   3   5    1.23    0.58 
  -6   3   5    1.46    0.47 
  -7   3   6   34.15    1.51 
  -7   3   6   32.85    1.51 
  -8   3   7    0.73    0.76 
  -8   3   7    0.45    0.68 
  -9   3   8   10.33    1.18 
 -10   3   9    2.31    0.97 
 -11   3  10    4.98    1.14 
 -12   3  11    7.72    1.46 
  11   2 -11    1.17    1.53 
  10   2 -10    5.81    1.55 
  10   2 -10    6.23    1.23 
  -9  -2   9    1.95    1.05 
   9   2  -9    4.25    1.07 
   9   2  -9    3.37    1.37 
  -8  -2   8    5.40    1.13 
   8   2  -8    7.72    1.46 
   8   2  -8    7.34    1.12 
  -7  -2   7   21.28    1.68 
   7   2  -7   21.81    1.67 
  -6  -2   6    3.59    0.40 
  -6  -2   6    4.70    0.99 
   6   2  -6    3.88    0.91 
  -5  -2   5   14.11    0.55 
  -5  -2   5   14.67    1.14 
   5   2  -5   13.72    1.03 
  -4  -2   4    6.58    0.40 
  -4  -2   4    8.87    0.86 
   4   2  -4    6.10    0.74 
  -3  -2   3   22.66    1.06 
  -3  -2   3   21.25    0.51 
   3   2  -3   23.56    1.29 
   3   2  -3   22.31    1.00 
   2   2  -2    7.18    0.65 
   2   2  -2    8.52    0.76 
   1   2  -1  117.12    1.89 
   1   2  -1  115.58    1.73 
   0   2   0  119.21    1.53 
   0   2   0  120.03    1.57 
  -1   2   1    4.42    0.36 
  -1   2   1    2.97    0.35 
  -2   2   2   26.44    0.90 
  -2   2   2   26.10    0.81 
  -3   2   3   79.42    1.50 
  -3   2   3   78.06    1.43 
  -4   2   4   80.34    1.64 
  -4   2   4   80.58    1.63 
  -5   2   5    0.91    0.47 
  -5   2   5    0.75    0.44 
  -6   2   6    0.65    0.50 
  -6   2   6    1.23    0.64 
  -7   2   7    2.02    0.70 
  -7   2   7    1.63    0.78 
  -8   2   8    1.29    0.81 
  -9   2   9   19.78    1.56 
 -10   2  10   -0.72    0.83 
 -11   2  11   23.33    1.99 
  11   1 -10    1.83    1.52 
  10   1  -9   12.41    1.42 
  10   1  -9   12.53    1.89 
  -9  -1   8    2.34    1.04 
   9   1  -8    2.70    1.27 
  -8  -1   7    6.42    1.12 
   8   1  -7    5.34    1.39 
  -7  -1   6   26.88    0.89 
  -7  -1   6   30.10    1.77 
  -6  -1   5    0.89    0.37 
  -6  -1   5    0.41    0.68 
  -5  -1   4    9.97    0.95 
  -5  -1   4   10.08    0.54 
  -4  -1   3    2.80    0.63 
  -4  -1   3    2.16    0.32 
  -3  -1   2   -0.33    0.24 
  -3  -1   2    0.27    0.43 
   3   1  -2    0.10    0.57 
  -2  -1   1   10.02    0.47 
   2   1  -1    8.86    0.52 
   2   1  -1    9.52    0.80 
   1   1   0  721.13    6.43 
   1   1   0  725.24    6.47 
   0   1   1   58.60    0.91 
   0   1   1   57.39    0.78 
  -1   1   2  277.25    2.75 
  -1   1   2  279.42    2.76 
  -2   1   3   52.34    1.12 
  -2   1   3   54.91    1.13 
  -3   1   4  161.70    2.30 
  -3   1   4  159.91    2.28 
  -4   1   5   21.42    0.95 
  -4   1   5   20.19    1.02 
  -5   1   6    0.09    0.52 
  -6   1   7    6.93    0.94 
  -7   1   8    2.10    0.86 
  -8   1   9    6.66    1.12 
  -9   1  10    0.97    0.89 
 -10   1  11   -0.32    0.93 
 -11   1  12    6.57    1.35 
  12   0 -10    2.50    1.56 
  11   0  -9    2.78    1.45 
  10   0  -8    8.06    1.56 
  -9   0   7   -0.29    0.93 
   9   0  -7   -0.04    0.98 
  -8   0   6   28.51    1.06 
  -8   0   6   31.31    1.84 
   8   0  -6   25.33    1.95 
  -7   0   5    8.02    1.08 
  -7   0   5    7.53    0.63 
  -6   0   4    8.72    0.97 
  -6   0   4    7.77    0.58 
  -5   0   3   12.45    0.62 
  -5   0   3   11.82    0.93 
  -4   0   2    0.38    0.47 
  -4   0   2    0.84    0.30 
   4   0  -2    0.07    0.54 
  -3   0   1    0.16    0.30 
   3   0  -1   -0.37    0.52 
  -2   0   0    4.89    0.36 
   2   0   0    3.30    0.54 
  -1   0  -1  386.19    3.11 
   0   0   2    8.56    0.39 
  -1   0   3  171.60    2.02 
  -2   0   4   63.29    1.28 
  -3   0   5   80.89    1.68 
  -4   0   6   83.31    1.89 
  -5   0   7    1.13    0.64 
  -6   0   8   24.57    1.54 
  -7   0   9    0.18    0.77 
  -8   0  10   -0.09    0.80 
  -9   0  11    0.86    0.94 
 -10   0  12    7.73    1.42 
  12  -1  -9    3.88    1.55 
  11  -1  -8    4.65    1.49 
  10  -1  -7    4.88    1.41 
  -9   1   6    0.95    0.84 
  -9   1   6   -0.22    0.46 
   9  -1  -6    1.84    1.12 
  -8   1   5   36.18    1.83 
  -8   1   5   34.43    1.17 
   8  -1  -5   33.13    2.01 
  -7   1   4    7.00    0.94 
  -7   1   4    5.46    0.62 
   7  -1  -4    5.42    1.11 
  -6   1   3   17.99    0.81 
  -6   1   3   17.53    1.07 
   6  -1  -3   15.60    1.26 
  -5   1   2    3.25    0.44 
  -5   1   2    2.44    0.40 
  -5   1   2    2.76    0.57 
   5  -1  -2    2.54    0.70 
  -4   1   1    0.33    0.26 
  -4   1   1   -0.02    0.31 
   4  -1  -1    0.16    0.54 
  -3   1   0    0.29    0.32 
  -3   1   0   -0.23    0.23 
   3  -1   0   -0.80    0.53 
  -2   1  -1    1.52    0.32 
  -2   1  -1    2.33    0.25 
   2  -1   1    1.25    0.46 
  -1   1  -2   82.44    1.01 
  -1   1  -2   82.31    1.10 
   1  -1   2   81.59    1.07 
   0   1  -3   42.90    0.66 
   0  -1   3   41.33    0.84 
  -1  -1   4    0.78    0.41 
  -2  -1   5   46.05    1.20 
  -3  -1   6   22.56    1.01 
  -4  -1   7   70.16    1.86 
  -5  -1   8    0.48    0.61 
  -6  -1   9    6.17    1.04 
  -7  -1  10    0.57    0.78 
  -8  -1  11   -0.33    0.84 
  -9  -1  12    0.98    0.92 
 -10  -1  13    5.45    1.29 
  12  -2  -8    2.19    1.41 
  11  -2  -7    3.98    1.44 
 -10   2   6   -0.44    0.52 
  10  -2  -6    0.24    1.15 
  -9   2   5   19.34    1.54 
  -9   2   5   17.90    1.01 
   9  -2  -5   19.07    1.79 
  -8   2   4    8.08    0.77 
  -8   2   4    8.61    1.10 
   8  -2  -4    7.77    1.25 
  -7   2   3    1.77    0.73 
  -7   2   3    1.57    0.48 
  -7   2   3    1.04    0.48 
   7  -2  -3    0.09    0.82 
  -6   2   2    0.16    0.38 
  -6   2   2    0.17    0.56 
  -6   2   2   -0.21    0.32 
   6  -2  -2    0.28    0.67 
  -5   2   1    2.02    0.37 
  -5   2   1    1.71    0.40 
   5  -2  -1    1.19    0.60 
  -4   2   0   88.57    1.37 
  -4   2   0   91.20    1.49 
   4  -2   0   91.56    1.74 
  -3   2  -1   17.48    0.65 
  -3   2  -1   16.36    0.65 
   3  -2   1   15.78    0.96 
  -2   2  -2    0.78    0.33 
  -2   2  -2    1.96    0.46 
   2  -2   2    1.47    0.41 
  -1   2  -3   29.49    0.71 
  -1   2  -3   28.71    1.13 
   1  -2   3   29.79    0.74 
   0   2  -4   48.56    1.29 
   0   2  -4   48.88    0.77 
   0  -2   4   48.75    0.99 
   1   2  -5   21.95    1.07 
   1   2  -5   21.19    0.47 
  -1  -2   5   20.95    0.87 
   2   2  -6   10.89    0.35 
  -2  -2   6   10.48    0.75 
  -3  -2   7   77.86    1.85 
  -4  -2   8    0.62    0.59 
  -5  -2   9    2.29    0.82 
  -6  -2  10    2.50    0.96 
  -7  -2  11    1.12    0.81 
  -8  -2  12    6.84    1.20 
   9   2 -13    2.77    1.15 
  -9  -2  13    3.39    1.10 
  10   2 -14    4.88    1.30 
 -10  -2  14    3.57    1.28 
  13  -3  -8    1.87    1.46 
  12  -3  -7    2.53    1.39 
 -11   3   6   -0.59    0.52 
  11  -3  -6    1.97    1.20 
 -10   3   5   -0.33    0.51 
  10  -3  -5    1.23    1.12 
  -9   3   4    0.26    0.58 
  -9   3   4    1.71    0.60 
   9  -3  -4    1.04    1.07 
  -8   3   3    7.83    0.78 
  -8   3   3    6.79    0.76 
   8  -3  -3    7.56    1.26 
  -7   3   2    4.59    0.60 
  -7   3   2    5.02    0.65 
   7  -3  -2    5.36    0.97 
  -6   3   1   12.64    0.75 
  -6   3   1   10.14    0.75 
   6  -3  -1   12.19    1.00 
  -5   3   0    0.18    0.32 
  -5   3   0    0.88    0.42 
   5  -3   0    0.37    0.55 
  -4   3  -1   30.91    0.92 
  -4   3  -1   31.27    0.96 
   4  -3   1   31.22    1.06 
  -3   3  -2    2.56    0.42 
  -3   3  -2    1.98    0.42 
   3  -3   2    2.11    0.42 
  -2   3  -3    9.31    0.72 
  -2   3  -3    9.80    0.60 
   2  -3   3   10.11    0.48 
  -1   3  -4   -0.01    0.28 
  -1   3  -4    0.90    0.57 
   1  -3   4    0.08    0.27 
   0   3  -5    5.44    0.70 
   0   3  -5    5.89    0.41 
   0  -3   5    5.03    0.50 
   1   3  -6    9.63    0.89 
   1   3  -6    9.98    0.36 
  -1  -3   6    9.94    0.66 
   2   3  -7    0.38    0.67 
  -2  -3   7    0.21    0.47 
   3   3  -8    6.63    0.99 
  -3  -3   8    6.78    0.79 
   4   3  -9   -0.04    0.80 
  -4  -3   9    1.40    0.71 
   5   3 -10   -1.03    0.96 
  -5  -3  10    1.00    0.77 
   6   3 -11   -0.20    0.99 
  -6  -3  11   -0.21    0.78 
   7   3 -12    0.85    1.06 
  -7  -3  12    1.31    0.88 
   8   3 -13    2.23    1.20 
  -8  -3  13   -0.23    0.86 
   9   3 -14    0.85    1.21 
  -9  -3  14   -0.80    1.08 
  13  -4  -7    1.99    1.40 
 -12   4   6   -0.61    0.57 
  12  -4  -6    1.54    1.24 
 -11   4   5    1.83    0.72 
  11  -4  -5    3.61    1.29 
 -10   4   4    0.07    0.54 
 -10   4   4   -0.76    0.56 
  10  -4  -4    0.54    1.03 
  -9   4   3    3.78    0.72 
  -9   4   3    3.08    0.66 
   9  -4  -3    3.24    1.14 
  -8   4   2    0.58    0.57 
  -8   4   2    0.81    0.55 
   8  -4  -2    0.44    0.93 
  -7   4   1    0.52    0.52 
  -7   4   1    0.24    0.45 
   7  -4  -1   -0.43    0.73 
  -6   4   0   14.71    0.83 
  -6   4   0   13.64    0.86 
   6  -4   0   15.61    1.14 
  -5   4  -1    0.03    0.41 
  -5   4  -1   -0.45    0.36 
   5  -4   1    0.21    0.50 
  -4   4  -2    6.24    0.56 
  -4   4  -2    5.42    0.56 
   4  -4   2    5.75    0.52 
  -3   4  -3   17.95    0.77 
  -3   4  -3   17.74    0.95 
   3  -4   3   16.25    0.51 
  -2   4  -4   13.31    0.66 
  -2   4  -4   12.75    0.91 
   2  -4   4   12.07    0.47 
  -1   4  -5   19.72    0.68 
  -1   4  -5   19.53    1.17 
   1  -4   5   19.78    0.67 
   0   4  -6    1.31    0.29 
   0   4  -6    1.21    0.68 
   0  -4   6    2.13    0.42 
   1   4  -7    4.13    0.81 
   1   4  -7    5.73    0.37 
  -1  -4   7    6.07    0.64 
   2   4  -8    0.39    0.71 
  -2  -4   8    0.62    0.55 
   3   4  -9    1.68    0.98 
  -3  -4   9    3.24    0.71 
   4   4 -10    3.48    1.21 
  -4  -4  10    6.32    1.01 
   5   4 -11    1.68    1.22 
  -5  -4  11    0.54    0.78 
   6   4 -12    1.07    1.18 
  -6  -4  12    0.15    0.77 
   7   4 -13    2.32    1.19 
  -7  -4  13    2.11    1.09 
   8   4 -14    0.31    1.13 
  -8  -4  14    1.26    1.02 
   9   4 -15    1.26    1.42 
  -9  -4  15    2.89    1.37 
 -13   5   6    6.90    1.06 
 -12   5   5    0.85    0.67 
  12  -5  -5    1.24    1.14 
 -11   5   4    4.36    0.84 
 -11   5   4    4.25    0.84 
  11  -5  -4    3.49    1.26 
 -10   5   3    0.50    0.56 
 -10   5   3    0.11    0.60 
  10  -5  -3   -0.24    0.98 
  -9   5   2    3.60    0.71 
  -9   5   2    3.40    0.73 
   9  -5  -2    5.88    1.16 
  -8   5   1    0.26    0.58 
  -8   5   1   -0.47    0.48 
   8  -5  -1   -0.11    0.89 
  -7   5   0    0.53    0.56 
  -7   5   0    0.86    0.49 
   7  -5   0    0.74    0.73 
  -6   5  -1    0.54    0.48 
  -6   5  -1    0.49    0.44 
   6  -5   1    1.34    0.58 
  -5   5  -2   21.48    0.97 
  -5   5  -2   17.93    0.96 
   5  -5   2   19.33    0.88 
  -4   5  -3    0.67    0.39 
  -4   5  -3    0.41    0.45 
   4  -5   3   -0.04    0.25 
  -3   5  -4   98.02    1.70 
  -3   5  -4   95.71    2.07 
  -2   5  -5   82.47    1.45 
  -2   5  -5   81.40    2.10 
   2  -5   5   82.40    1.16 
  -1   5  -6    7.89    0.54 
  -1   5  -6    8.21    1.02 
   1  -5   6    8.47    0.59 
   0   5  -7    1.47    0.80 
   0   5  -7    1.65    0.31 
   0  -5   7    1.38    0.46 
   1   5  -8    6.77    0.40 
   1   5  -8    7.36    1.09 
  -1  -5   8    6.16    0.74 
   2   5  -9   10.28    1.37 
  -2  -5   9   11.53    1.01 
   3   5 -10   -0.59    1.07 
  -3  -5  10   -0.66    0.70 
   4   5 -11    5.28    1.45 
  -4  -5  11    5.52    1.03 
   5   5 -12   -0.89    1.07 
  -5  -5  12    1.21    0.85 
   6   5 -13   -1.37    1.08 
  -6  -5  13    2.10    0.93 
   7   5 -14    0.37    1.20 
  -7  -5  14    1.18    1.06 
   8   5 -15    2.45    1.53 
  -8  -5  15    0.55    1.20 
 -13   6   5    0.13    0.76 
 -12   6   4    1.44    0.76 
 -11   6   3   -0.33    0.63 
 -11   6   3   -0.63    0.61 
  11  -6  -3   -0.18    1.03 
 -10   6   2    1.80    0.69 
 -10   6   2    0.66    0.66 
  10  -6  -2    1.28    0.99 
  -9   6   1   10.71    0.99 
  -9   6   1   10.19    1.02 
   9  -6  -1    8.20    1.12 
  -8   6   0    0.28    0.54 
  -8   6   0    0.28    0.56 
   8  -6   0    1.27    0.82 
  -7   6  -1   13.99    0.96 
  -7   6  -1   10.58    0.91 
   7  -6   1   12.42    0.95 
  -6   6  -2    6.64    0.73 
  -6   6  -2    6.98    0.79 
   6  -6   2    6.71    0.67 
  -5   6  -3    7.10    0.78 
  -5   6  -3    8.56    0.73 
  -4   6  -4    0.36    0.59 
  -4   6  -4    0.02    0.40 
  -3   6  -5    8.02    0.65 
  -3   6  -5    7.19    0.93 
  -2   6  -6   15.12    0.73 
  -2   6  -6   17.32    1.38 
   2  -6   6   15.86    0.64 
  -1   6  -7   13.24    1.24 
  -1   6  -7   13.56    0.67 
   1  -6   7   13.48    0.78 
   0   6  -8    4.53    0.43 
   0   6  -8    3.60    1.03 
   0  -6   8    5.18    0.67 
   1   6  -9    1.98    1.05 
   1   6  -9    1.42    0.30 
  -1  -6   9    1.32    0.61 
   2   6 -10   61.64    2.69 
  -2  -6  10   59.45    1.87 
   3   6 -11    9.42    1.57 
  -3  -6  11   13.77    1.25 
   4   6 -12   12.30    1.76 
  -4  -6  12   11.97    1.22 
   5   6 -13    4.88    1.55 
  -5  -6  13    2.64    1.00 
   6   6 -14    3.24    1.55 
  -6  -6  14    0.48    0.98 
   7   6 -15   -0.18    1.41 
  -7  -6  15    0.15    1.07 
 -13   7   4    4.25    0.95 
 -12   7   3    1.35    0.74 
 -11   7   2    0.18    0.64 
 -11   7   2    0.50    0.71 
 -10   7   1    2.74    0.75 
 -10   7   1    2.51    0.75 
  -9   7   0    4.47    0.79 
  -9   7   0    4.75    0.80 
  -8   7  -1   28.27    1.40 
  -8   7  -1   28.25    1.40 
  -7   7  -2    0.46    0.61 
  -7   7  -2    0.64    0.59 
  -6   7  -3   -1.26    0.57 
  -6   7  -3   -0.03    0.53 
  -5   7  -4   25.78    1.16 
  -5   7  -4   25.84    1.30 
  -4   7  -5    5.43    0.63 
  -4   7  -5    6.32    0.87 
  -3   7  -6   21.88    0.95 
  -3   7  -6   25.73    1.68 
   3  -7   6   23.01    0.60 
  -2   7  -7    8.16    1.23 
  -2   7  -7    7.60    0.63 
   2  -7   7    8.39    0.58 
  -1   7  -8    1.48    1.04 
  -1   7  -8    0.61    0.39 
   1  -7   8    1.34    0.52 
   0   7  -9    1.80    0.39 
   0   7  -9    1.78    1.21 
   0  -7   9    2.60    0.65 
   1   7 -10    1.03    1.23 
  -1  -7  10    0.66    0.69 
   2   7 -11   11.36    1.68 
  -2  -7  11   11.60    1.10 
   3   7 -12   -1.67    1.14 
  -3  -7  12    0.21    0.74 
   4   7 -13    3.09    1.47 
  -4  -7  13    2.11    0.91 
   5   7 -14    2.44    1.64 
  -5  -7  14    1.56    1.04 
   6   7 -15   -1.22    1.48 
  -6  -7  15    0.27    0.96 
   7   7 -16   -0.18    1.72 
  -7  -7  16   -1.02    1.14 
 -13   8   3    2.04    0.88 
 -12   8   2    1.99    0.86 
 -11   8   1    4.11    0.91 
 -11   8   1    4.30    0.95 
 -10   8   0    4.32    0.90 
 -10   8   0    4.26    0.85 
  -9   8  -1    1.29    0.65 
  -9   8  -1    1.32    0.72 
  -8   8  -2    4.84    0.84 
  -8   8  -2    4.19    0.80 
  -7   8  -3   -0.46    0.66 
  -7   8  -3    0.08    0.60 
  -6   8  -4   37.26    1.69 
  -6   8  -4   38.35    1.47 
  -5   8  -5    6.91    0.97 
  -5   8  -5    7.28    0.80 
  -4   8  -6   12.12    0.89 
  -4   8  -6   12.89    1.22 
  -3   8  -7   15.65    0.89 
  -3   8  -7   16.99    1.49 
  -2   8  -8    0.38    1.00 
  -2   8  -8    0.76    0.44 
   2  -8   8   -0.13    0.47 
  -1   8  -9    9.58    1.56 
  -1   8  -9    7.17    0.62 
   1  -8   9    7.80    0.79 
   0   8 -10    3.29    0.47 
   0   8 -10    3.13    1.33 
   0  -8  10    3.84    0.76 
   1   8 -11    7.77    1.54 
  -1  -8  11    7.31    0.97 
   2   8 -12    2.00    1.43 
  -2  -8  12   -0.50    0.74 
   3   8 -13    0.42    1.48 
  -3  -8  13    1.31    0.91 
   4   8 -14   11.80    1.98 
  -4  -8  14   11.43    1.41 
   5   8 -15   -1.02    1.58 
  -5  -8  15    0.03    0.99 
   6   8 -16    3.55    1.98 
  -6  -8  16    6.68    1.39 
 -12   9   1    0.08    0.76 
 -11   9   0    2.46    0.86 
 -11   9   0    3.24    0.87 
 -10   9  -1    2.44    0.79 
 -10   9  -1    1.59    0.77 
  -9   9  -2    2.15    0.76 
  -9   9  -2    2.40    0.76 
  -8   9  -3    9.29    1.02 
  -8   9  -3   10.11    1.10 
  -7   9  -4    0.25    0.65 
  -7   9  -4    0.64    0.60 
  -6   9  -5   25.76    1.62 
  -6   9  -5   22.77    1.22 
  -5   9  -6    5.12    1.06 
  -5   9  -6    4.61    0.72 
  -4   9  -7    8.85    1.31 
  -4   9  -7    7.90    0.82 
  -3   9  -8    7.63    0.79 
  -3   9  -8    6.69    1.25 
  -2   9  -9    0.80    1.24 
  -2   9  -9    2.18    0.54 
  -1   9 -10    0.19    0.42 
  -1   9 -10    1.39    1.19 
   1  -9  10   -0.40    0.62 
   0   9 -11    4.73    1.41 
   0  -9  11    5.52    0.87 
   1   9 -12    6.14    1.62 
  -1  -9  12    3.35    0.92 
   2   9 -13   11.16    1.93 
  -2  -9  13   11.20    1.29 
   3   9 -14   13.23    2.03 
  -3  -9  14    8.62    1.26 
   4   9 -15   -1.03    1.63 
  -4  -9  15    0.13    0.95 
   5   9 -16   -1.45    1.75 
  -5  -9  16   -2.49    0.99 
 -12  10   0    4.21    0.96 
 -11  10  -1    8.44    1.16 
 -11  10  -1   10.44    1.23 
 -10  10  -2    0.51    0.73 
 -10  10  -2    1.46    0.79 
  -9  10  -3    1.01    0.71 
  -9  10  -3   -0.19    0.70 
  -8  10  -4    9.54    1.17 
  -8  10  -4    9.43    1.08 
  -7  10  -5    3.26    0.95 
  -7  10  -5    1.74    0.66 
  -6  10  -6    0.16    0.81 
  -6  10  -6    0.37    0.60 
  -5  10  -7    0.50    0.57 
  -5  10  -7    0.95    0.93 
  -4  10  -8   22.16    1.13 
  -4  10  -8   20.45    1.71 
  -3  10  -9    1.76    1.16 
  -3  10  -9    0.61    0.52 
  -2  10 -10    5.99    0.67 
  -2  10 -10    5.36    1.41 
  -1  10 -11   25.13    2.13 
   0  10 -12    3.53    1.48 
   1  10 -13    3.00    1.66 
   2  10 -14    2.13    1.58 
  -2 -10  14    1.38    0.94 
   3  10 -15    3.44    1.77 
   3  10 -15   10.16    1.54 
  -3 -10  15    5.88    1.26 
   4  10 -16    3.05    1.29 
   4  10 -16    1.12    1.77 
  -4 -10  16   -0.79    1.10 
 -12  11  -1    6.06    1.10 
 -11  11  -2    8.11    1.24 
 -11  11  -2   10.74    1.30 
 -10  11  -3    2.62    0.88 
 -10  11  -3    2.45    0.91 
  -9  11  -4   10.40    1.16 
  -9  11  -4    9.55    1.24 
  -8  11  -5   13.16    1.24 
  -8  11  -5   17.83    1.56 
  -7  11  -6   -0.01    0.87 
  -7  11  -6    0.72    0.65 
  -6  11  -7    0.50    0.86 
  -6  11  -7   -0.08    0.59 
  -5  11  -8    1.36    0.64 
  -5  11  -8    1.04    1.03 
  -4  11  -9    6.06    0.82 
  -4  11  -9    7.74    1.33 
  -3  11 -10    0.55    1.08 
  -3  11 -10    0.41    0.50 
  -2  11 -11    0.71    1.24 
  -1  11 -12    9.79    1.81 
   0  11 -13    2.27    1.46 
   1  11 -14    1.72    1.68 
   2  11 -15    4.05    2.00 
 -11  12  -3   -0.14    0.89 
 -11  12  -3   -0.33    0.81 
 -10  12  -4    9.25    1.20 
 -10  12  -4    4.19    1.10 
  -9  12  -5    5.97    1.18 
  -9  12  -5    6.08    1.03 
  -8  12  -6    3.13    0.87 
  -8  12  -6    5.37    1.18 
  -7  12  -7    0.38    0.66 
  -7  12  -7   -0.67    0.90 
  -6  12  -8    9.70    1.03 
  -6  12  -8    8.69    1.39 
  -5  12  -9   12.59    1.62 
  -5  12  -9   12.45    1.07 
  -4  12 -10    1.18    0.60 
  -4  12 -10    0.35    1.16 
  -3  12 -11    0.13    1.29 
  -2  12 -12   12.20    1.90 
  -1  12 -13    5.09    1.73 
   0  12 -14   -0.70    1.59 
   1  12 -15    8.23    2.04 
 -10  13  -5    2.47    1.14 
 -10  13  -5    3.96    0.96 
  -9  13  -6    5.29    1.24 
  -9  13  -6    7.82    1.10 
  -8  13  -7    4.46    0.92 
  -8  13  -7    5.22    1.22 
  -7  13  -8   -0.08    1.04 
  -7  13  -8    0.52    0.67 
  -6  13  -9    0.04    0.59 
  -6  13  -9   -1.69    0.99 
  -5  13 -10   -0.06    0.59 
  -5  13 -10   -0.78    1.10 
  -4  13 -11   -2.78    1.07 
  -3  13 -12   -0.50    1.18 
  -2  13 -13    2.69    1.51 
  -1  13 -14    2.53    1.67 
  -8  14  -8    2.06    0.83 
  -8  14  -8    0.21    1.15 
  -7  14  -9    3.08    1.32 
  -7  14  -9    3.13    0.87 
  -6  14 -10   -0.46    1.09 
  -6  14 -10    0.41    0.69 
  -4  14 -12   -1.57    1.31 
  -3  14 -13   -0.73    1.45 
  -3  15  -9    2.32    1.43 
  -4  15  -8    0.50    1.16 
  -5  15  -7    0.58    1.12 
  -6  15  -6   -1.03    1.00 
  -7  15  -5    4.17    1.29 
   0  14 -11    2.03    1.55 
  -1  14 -10    0.28    1.32 
  -2  14  -9    0.79    1.16 
  -3  14  -8    2.47    1.29 
  -4  14  -7    4.24    1.30 
  -5  14  -6   -0.48    1.05 
  -6  14  -5    4.24    1.23 
  -7  14  -4    8.03    1.40 
  -8  14  -3   -2.49    0.91 
  -9  14  -2    4.56    1.21 
   2  13 -12    4.92    1.84 
   1  13 -11    4.59    1.58 
   0  13 -10    1.25    1.36 
  -1  13  -9   -0.48    1.04 
  -2  13  -8    6.97    1.38 
  -3  13  -7    7.14    1.42 
  -4  13  -6   -1.72    0.91 
  -5  13  -5    4.79    1.25 
  -6  13  -4    5.64    1.25 
  -7  13  -3    2.20    1.10 
  -8  13  -2    0.76    1.00 
  -9  13  -1    3.08    1.03 
 -10  13   0    1.88    1.07 
   3  12 -12   -0.82    1.58 
   2  12 -11    4.50    1.66 
   1  12 -10    0.30    1.34 
   0  12  -9    0.66    1.27 
  -1  12  -8   17.16    1.84 
  -2  12  -7    7.90    1.37 
  -3  12  -6    6.84    1.30 
  -4  12  -5    1.87    1.06 
  -5  12  -4   52.64    2.28 
  -6  12  -3    8.65    1.33 
  -7  12  -2    2.19    1.00 
  -8  12  -1    3.80    1.07 
  -9  12   0    4.77    1.10 
 -10  12   1    0.10    0.85 
 -11  12   2    1.03    0.97 
   4  11 -12    4.74    1.44 
   4  11 -12    2.20    1.67 
   3  11 -11    5.72    1.42 
   3  11 -11    7.28    1.76 
   2  11 -10    8.27    1.61 
   2  11 -10    8.49    1.43 
   1  11  -9    2.29    1.30 
   0  11  -8   -0.82    1.02 
  -1  11  -7   34.77    2.11 
  -2  11  -6   24.21    1.86 
  -3  11  -5    3.47    1.03 
  -4  11  -4   11.98    1.32 
  -5  11  -3   45.83    2.08 
  -6  11  -2    7.93    1.20 
  -7  11  -1    4.09    1.03 
  -8  11   0    8.49    1.18 
  -9  11   1    3.22    1.00 
 -10  11   2    2.06    0.93 
 -11  11   3    3.90    1.15 
   5  10 -12    0.76    1.64 
   5  10 -12    5.60    1.53 
   4  10 -11    2.18    1.24 
   4  10 -11    1.24    1.48 
   3  10 -10    4.82    1.61 
   3  10 -10    7.71    1.41 
   2  10  -9   18.86    1.69 
   2  10  -9   19.77    1.95 
   1  10  -8   23.47    1.79 
   1  10  -8   21.06    1.96 
   0  10  -7   24.41    1.95 
   0  10  -7   21.55    1.72 
  -1  10  -6    2.71    1.06 
  -2  10  -5    0.75    0.92 
  -3  10  -4   -0.30    0.89 
  -4  10  -3    1.68    0.93 
  -5  10  -2   10.21    1.26 
  -6  10  -1    1.63    0.78 
  -7  10   0    2.94    0.90 
  -8  10   1    2.04    0.82 
  -9  10   2   -0.23    0.75 
 -10  10   3   -1.07    0.74 
 -11  10   4    6.75    1.23 
 -12  10   5    7.17    1.29 
   6   9 -12    1.69    1.66 
   6   9 -12    6.40    1.66 
   5   9 -11   -1.63    1.42 
   5   9 -11    1.22    1.23 
   4   9 -10    6.99    1.61 
   3   9  -9   36.53    2.67 
   3   9  -9   36.07    2.20 
   2   9  -8    0.82    0.93 
   2   9  -8   -0.43    1.07 
   1   9  -7   25.64    1.84 
   1   9  -7   25.92    2.00 
   0   9  -6    0.00    0.99 
   0   9  -6    1.04    0.89 
  -1   9  -5    3.01    1.01 
  -1   9  -5    3.35    0.86 
  -2   9  -4   15.58    1.08 
  -2   9  -4   15.92    1.43 
  -3   9  -3    7.01    1.04 
  -4   9  -2    7.04    1.03 
  -5   9  -1    0.60    0.79 
  -6   9   0    7.23    1.08 
  -7   9   1    9.02    1.13 
  -8   9   2   -0.15    0.72 
  -9   9   3    0.30    0.78 
 -10   9   4   13.53    1.35 
 -11   9   5    1.24    0.89 
 -12   9   6    3.99    1.11 
   7   8 -12    7.75    1.76 
   7   8 -12    7.26    1.82 
   6   8 -11    1.11    1.35 
   6   8 -11    1.99    1.30 
   5   8 -10    0.97    1.21 
   5   8 -10   -0.36    1.36 
   4   8  -9    4.98    1.45 
   4   8  -9    5.28    1.30 
   3   8  -8   10.34    1.65 
   3   8  -8    9.99    1.42 
   2   8  -7   -0.14    1.24 
   2   8  -7   -0.07    1.02 
   1   8  -6    3.46    1.11 
   1   8  -6    1.49    0.95 
   0   8  -5    6.50    1.01 
   0   8  -5    4.80    1.09 
  -1   8  -4    0.71    0.79 
  -1   8  -4    1.19    0.69 
  -2   8  -3   -0.14    0.50 
  -2   8  -3    0.52    0.71 
  -3   8  -2   -0.08    0.31 
  -3   8  -2    0.09    0.65 
  -4   8  -1    1.93    0.72 
  -4   8  -1    1.62    0.27 
  -5   8   0    0.08    0.61 
  -5   8   0   -0.02    0.29 
  -6   8   1   10.09    1.10 
  -6   8   1   11.43    0.73 
  -7   8   2    4.73    0.88 
  -8   8   3    7.57    1.03 
  -9   8   4    0.16    0.72 
 -10   8   5   10.29    1.24 
 -11   8   6    3.31    1.02 
 -12   8   7   -0.93    0.80 
   8   7 -12    1.31    1.58 
   8   7 -12    2.93    1.59 
   7   7 -11    0.72    1.47 
   7   7 -11    4.73    1.53 
   6   7 -10    3.24    1.43 
   6   7 -10   -0.52    1.12 
   5   7  -9    1.81    1.31 
   5   7  -9    0.79    1.04 
   4   7  -8    1.66    1.03 
   4   7  -8    1.00    1.16 
   3   7  -7    0.71    1.26 
   3   7  -7    1.13    1.06 
   2   7  -6   -0.14    0.95 
   2   7  -6    1.38    1.15 
   1   7  -5    4.04    1.08 
   1   7  -5    5.89    0.95 
   0   7  -4    0.37    0.76 
   0   7  -4   -0.26    0.65 
  -1   7  -3    1.20    0.67 
  -1   7  -3   -0.03    0.55 
  -2   7  -2    3.10    0.50 
  -2   7  -2    3.45    0.74 
  -3   7  -1   18.16    1.18 
  -3   7  -1   17.09    0.64 
  -4   7   0    4.43    0.76 
  -4   7   0    5.59    0.41 
  -5   7   1    1.48    0.62 
  -5   7   1    1.86    0.41 
  -6   7   2    3.54    0.53 
  -6   7   2    3.75    0.68 
  -6   7   2    2.93    0.79 
  -7   7   3   15.43    1.02 
  -7   7   3   17.93    1.35 
  -8   7   4    2.54    0.67 
  -8   7   4    1.45    0.77 
  -9   7   5   16.28    1.38 
  -9   7   5   13.90    1.12 
 -10   7   6    9.67    1.25 
 -10   7   6    7.83    1.02 
 -11   7   7    1.08    0.83 
 -12   7   8    0.73    0.90 
   9   6 -12    0.77    1.55 
   9   6 -12    1.99    1.64 
   8   6 -11    5.41    1.57 
   8   6 -11    4.55    1.52 
   7   6 -10   -0.29    1.10 
   7   6 -10    3.10    1.43 
   6   6  -9   -0.22    1.17 
   6   6  -9    0.03    1.00 
   5   6  -8    3.86    1.25 
   5   6  -8    2.82    1.32 
   4   6  -7    1.01    1.20 
   4   6  -7    0.04    1.07 
   3   6  -6   -0.22    0.79 
   3   6  -6    0.22    1.03 
   2   6  -5    5.47    1.04 
   2   6  -5    5.21    0.94 
   1   6  -4   11.22    1.03 
   1   6  -4   12.11    1.11 
   0   6  -3    2.41    0.66 
   0   6  -3    3.08    0.80 
  -1   6  -2    7.81    0.71 
  -1   6  -2    7.28    0.81 
  -2   6  -1   11.17    0.71 
  -2   6  -1   13.49    1.00 
  -3   6   0    3.84    0.39 
  -3   6   0    4.17    0.65 
  -4   6   1    0.81    0.50 
  -4   6   1    0.18    0.29 
  -5   6   2   12.91    1.02 
  -5   6   2   11.46    0.75 
  -6   6   3    2.79    0.57 
  -6   6   3    2.79    0.67 
  -7   6   4    8.96    1.02 
  -7   6   4    8.31    0.85 
  -8   6   5   -0.19    0.61 
  -8   6   5   -0.50    0.59 
  -9   6   6   -0.23    0.70 
  -9   6   6    1.01    0.67 
 -10   6   7    3.52    0.91 
 -10   6   7    2.59    0.89 
 -11   6   8    0.92    0.82 
 -11   6   8    0.38    0.78 
 -12   6   9    2.75    1.06 
 -12   6   9    3.33    1.20 
   9   5 -11    2.36    1.47 
   9   5 -11   -0.93    1.29 
   8   5 -10   -0.03    1.27 
   8   5 -10   -0.16    1.22 
   7   5  -9    1.57    1.23 
   7   5  -9   -0.77    1.13 
   6   5  -8    4.53    1.25 
   6   5  -8    1.76    1.22 
   5   5  -7    2.88    1.15 
   5   5  -7    2.87    1.23 
  -4  -5   6    0.89    0.24 
   4   5  -6   -1.15    0.91 
   4   5  -6    0.89    1.07 
   3   5  -5    3.27    0.89 
   3   5  -5    2.13    0.94 
   2   5  -4    3.75    0.88 
   2   5  -4    2.35    0.79 
   1   5  -3    2.40    0.76 
   1   5  -3    1.91    0.68 
   0   5  -2   11.12    0.83 
   0   5  -2   11.31    0.88 
  -1   5  -1   34.15    1.00 
  -1   5  -1   32.75    1.27 
  -2   5   0   22.76    1.09 
  -2   5   0   22.07    0.75 
  -3   5   1   -0.38    0.28 
  -3   5   1    0.24    0.46 
  -4   5   2    7.71    0.60 
  -4   5   2    6.95    0.71 
  -5   5   3   16.11    0.87 
  -5   5   3   15.82    1.01 
  -6   5   4    0.00    0.47 
  -6   5   4   -0.30    0.51 
  -7   5   5    0.34    0.60 
  -7   5   5    0.88    0.61 
  -8   5   6    9.91    1.04 
  -8   5   6    9.93    1.10 
  -9   5   7   16.54    1.34 
  -9   5   7   16.19    1.27 
 -10   5   8    0.51    0.77 
 -10   5   8    0.16    0.73 
 -11   5   9    0.11    0.82 
 -11   5   9    1.20    0.89 
 -12   5  10    0.56    1.01 
  10   4 -11    2.22    1.54 
   9   4 -10    1.03    1.37 
   9   4 -10    0.99    1.19 
   8   4  -9    0.46    1.14 
   8   4  -9   -0.63    1.04 
   7   4  -8    3.43    1.19 
   7   4  -8    2.49    1.19 
   6   4  -7   -0.93    1.04 
   6   4  -7   -0.13    1.07 
  -5  -4   6    0.19    0.26 
   5   4  -6   -0.08    0.92 
   5   4  -6    0.17    0.96 
  -4  -4   5   26.25    0.59 
   4   4  -5   25.62    1.61 
   4   4  -5   29.64    1.71 
  -3  -4   4    5.59    0.39 
   3   4  -4    5.20    0.91 
   3   4  -4    4.56    0.88 
   2   4  -3    5.23    0.80 
   2   4  -3    5.26    0.83 
   1   4  -2   -0.22    0.52 
   1   4  -2   -0.29    0.56 
   0   4  -1   21.36    1.09 
   0   4  -1   19.92    1.06 
  -1   4   0    4.47    0.54 
  -1   4   0    4.80    0.49 
  -2   4   1    0.59    0.41 
  -2   4   1    0.41    0.33 
  -3   4   2    1.19    0.41 
  -3   4   2    1.62    0.35 
  -4   4   3    2.28    0.46 
  -4   4   3    2.83    0.56 
  -5   4   4   -0.07    0.47 
  -5   4   4    1.26    0.48 
  -6   4   5   -0.06    0.49 
  -6   4   5    0.08    0.50 
  -7   4   6    0.83    0.67 
  -7   4   6    0.87    0.65 
  -8   4   7    0.40    0.61 
  -8   4   7    0.80    0.74 
  -9   4   8    0.19    0.75 
  -9   4   8    0.75    0.72 
 -10   4   9   -0.48    0.75 
 -11   4  10    0.86    0.91 
 -12   4  11    2.59    1.17 
  11   3 -11    3.09    1.66 
  10   3 -10    7.29    1.37 
  10   3 -10    5.69    1.69 
   9   3  -9    4.14    1.23 
   9   3  -9    2.75    1.46 
   8   3  -8    2.28    1.20 
   8   3  -8    1.19    0.98 
   7   3  -7    5.03    1.40 
   7   3  -7    6.01    1.20 
  -6  -3   6   30.97    0.77 
   6   3  -6   31.33    2.18 
   6   3  -6   30.87    1.75 
  -5  -3   5   17.59    0.59 
   5   3  -5   19.61    1.55 
   5   3  -5   14.64    1.38 
  -4  -3   4   31.14    0.67 
   4   3  -4   32.33    1.43 
   4   3  -4   31.80    1.60 
  -3  -3   3    7.47    0.44 
   3   3  -3    7.41    0.80 
   3   3  -3    6.58    0.90 
   2   3  -2    1.69    0.57 
   2   3  -2    1.11    0.60 
   1   3  -1   -0.10    0.48 
   1   3  -1    0.35    0.58 
   0   3   0   11.69    0.74 
   0   3   0   12.62    0.97 
  -1   3   1    2.31    0.43 
  -1   3   1    1.84    0.43 
  -2   3   2    1.61    0.41 
  -2   3   2    2.68    0.39 
  -3   3   3    5.13    0.55 
  -3   3   3    6.09    0.53 
  -4   3   4    0.39    0.40 
  -4   3   4    0.52    0.42 
  -5   3   5   15.80    0.97 
  -5   3   5   16.98    1.05 
  -6   3   6    8.67    0.88 
  -6   3   6    8.01    0.86 
  -7   3   7    2.10    0.72 
  -7   3   7    2.36    0.78 
  -8   3   8   29.44    1.60 
  -8   3   8   32.46    1.67 
  -9   3   9    0.51    0.80 
 -10   3  10    0.74    0.85 
 -11   3  11    2.26    1.03 
  11   2 -10    0.18    1.45 
  10   2  -9    8.76    1.71 
  10   2  -9    5.17    1.21 
   9   2  -8   10.90    1.29 
   9   2  -8    8.78    1.61 
   8   2  -7    0.26    1.06 
   8   2  -7    1.14    0.92 
  -7  -2   6    2.88    0.46 
   7   2  -6    3.61    0.99 
   7   2  -6    1.69    1.20 
  -6  -2   5    1.80    0.39 
   6   2  -5    2.02    0.76 
   6   2  -5    0.99    0.93 
  -5  -2   4   -0.07    0.30 
   5   2  -4    0.19    0.80 
   5   2  -4    0.03    0.56 
  -4  -2   3    0.44    0.28 
   4   2  -3   -1.01    0.60 
   4   2  -3    0.15    0.52 
  -3  -2   2    3.67    0.36 
   3   2  -2    3.93    0.55 
   3   2  -2    3.37    0.70 
   2   2  -1   42.61    1.14 
   2   2  -1   42.39    1.38 
   1   2   0   55.07    1.12 
   1   2   0   52.81    1.50 
   0   2   1    4.46    0.56 
   0   2   1    4.32    0.41 
  -1   2   2   16.31    0.79 
  -1   2   2   16.07    0.74 
  -2   2   3   18.77    0.80 
  -2   2   3   18.46    0.77 
  -3   2   4    2.63    0.47 
  -3   2   4    2.34    0.45 
  -4   2   5   19.81    1.00 
  -4   2   5   19.83    1.01 
  -5   2   6    4.28    0.67 
  -5   2   6    3.68    0.61 
  -6   2   7    8.73    0.93 
  -6   2   7    9.80    0.94 
  -7   2   8    0.32    0.76 
  -8   2   9   25.99    1.55 
  -9   2  10    1.14    0.87 
 -10   2  11   -0.27    0.79 
 -11   2  12    2.31    1.08 
  11   1  -9    0.43    1.42 
  10   1  -8    4.68    1.06 
  10   1  -8    2.32    1.33 
   9   1  -7    5.80    1.51 
  -8  -1   6   12.22    0.79 
   8   1  -6   11.38    1.68 
  -7  -1   5    0.48    0.41 
   7   1  -5   -0.63    1.03 
  -6  -1   4   15.76    0.71 
   6   1  -4   16.24    1.41 
  -5  -1   3    3.28    0.41 
   5   1  -3    3.02    0.84 
  -4  -1   2    2.65    0.36 
   4   1  -2    2.78    0.74 
  -3  -1   1   16.76    0.59 
   3   1  -1   16.78    0.72 
   3   1  -1   15.71    1.10 
  -2  -1   0    6.02    0.43 
   2   1   0    5.17    0.43 
   2   1   0    3.88    0.75 
   1   1   1   59.95    1.37 
   1   1   1   59.97    0.78 
   0   1   2   28.64    0.63 
   0   1   2   29.43    0.87 
  -1   1   3   33.63    0.90 
  -1   1   3   32.87    0.92 
  -2   1   4   12.02    0.69 
  -2   1   4   12.09    0.70 
  -3   1   5   16.13    0.81 
  -3   1   5   18.44    0.94 
  -4   1   6   33.80    1.21 
  -4   1   6   34.00    1.31 
  -5   1   7   36.46    1.38 
  -6   1   8    0.59    0.69 
  -7   1   9   21.42    1.57 
  -8   1  10    0.95    0.84 
  -9   1  11    2.16    0.94 
 -10   1  12    0.50    0.96 
 -11   1  13    0.69    1.13 
  12   0  -9    3.09    1.64 
  11   0  -8    2.81    1.35 
  10   0  -7   14.61    1.90 
  -9   0   6    8.93    0.76 
   9   0  -6    7.56    1.45 
  -8   0   5    4.29    0.62 
   8   0  -5    3.57    1.31 
  -7   0   4    6.09    0.63 
   7   0  -4    6.58    1.16 
  -6   0   3    2.01    0.44 
   6   0  -3    1.07    0.78 
  -5   0   2   11.02    0.64 
   5   0  -2   12.36    1.12 
  -4   0   1    2.74    0.39 
   4   0  -1    3.68    0.74 
  -3   0   0    1.38    0.35 
   3   0   0    1.89    0.61 
  -2   0  -1   45.06    0.90 
   2   0   1   42.89    1.38 
  -1   0  -2   73.95    1.05 
   1   0   2   73.56    1.28 
   0   0   3   99.96    1.44 
  -1   0   4   12.44    0.72 
  -2   0   5    3.10    0.48 
  -3   0   6   17.75    0.99 
  -4   0   7   19.40    1.06 
  -5   0   8    0.72    0.58 
  -6   0   9    3.46    0.90 
  -7   0  10    0.07    0.82 
  -8   0  11    2.39    0.98 
  -9   0  12   -0.36    0.88 
 -10   0  13    0.25    0.92 
  12  -1  -8    2.51    1.53 
  11  -1  -7   10.21    1.76 
 -10   1   6   16.29    1.03 
  10  -1  -6   17.70    1.88 
  -9   1   5    7.06    0.73 
   9  -1  -5    5.64    1.37 
  -8   1   4   19.27    1.01 
   8  -1  -4   17.93    1.71 
  -7   1   3   22.47    0.99 
   7  -1  -3   22.01    1.66 
  -6   1   2    0.92    0.42 
   6  -1  -2    1.34    0.73 
  -5   1   1    9.86    0.57 
  -5   1   1   10.29    0.65 
   5  -1  -1   10.22    0.94 
  -4   1   0   71.99    1.27 
  -4   1   0   72.45    1.07 
   4  -1   0   73.63    1.76 
  -3   1  -1   56.45    0.78 
  -3   1  -1   56.20    1.07 
   3  -1   1   54.24    1.47 
  -2   1  -2   95.27    1.33 
  -2   1  -2   95.19    1.21 
   2  -1   2   95.55    1.60 
  -1   1  -3  120.06    1.46 
  -1   1  -3  113.56    1.56 
   1  -1   3  115.27    1.60 
   0   1  -4   69.67    1.05 
   0  -1   4   70.53    1.30 
  -1  -1   5    0.98    0.39 
  -2  -1   6   30.45    1.06 
  -3  -1   7    8.79    0.79 
  -4  -1   8   25.43    1.29 
  -5  -1   9   -1.71    0.61 
  -6  -1  10    4.47    0.91 
  -7  -1  11   16.38    1.50 
  -8  -1  12    1.84    0.97 
  -9  -1  13    1.64    1.05 
 -10  -1  14    1.89    1.08 
  12  -2  -7    9.90    1.78 
  11  -2  -6   17.28    1.97 
 -10   2   5    6.92    0.83 
  10  -2  -5    7.62    1.39 
  -9   2   4   10.04    0.86 
   9  -2  -4   14.92    1.69 
  -8   2   3   50.97    1.45 
   8  -2  -3   47.48    2.27 
  -7   2   2   36.99    1.16 
  -7   2   2   36.54    1.20 
   7  -2  -2   36.29    1.87 
  -6   2   1   29.76    1.05 
  -6   2   1   31.87    0.94 
   6  -2  -1   29.03    1.52 
  -5   2   0   69.81    1.43 
  -5   2   0   67.60    1.21 
   5  -2   0   70.19    1.86 
  -4   2  -1   81.34    1.43 
  -4   2  -1   81.53    1.23 
   4  -2   1   80.19    1.72 
  -3   2  -2    2.73    0.42 
  -3   2  -2    3.52    0.37 
   3  -2   2    3.29    0.57 
  -2   2  -3   18.69    0.67 
  -2   2  -3   20.19    0.98 
   2  -2   3   20.42    0.81 
  -1   2  -4    9.06    0.55 
  -1   2  -4    7.88    0.69 
   1  -2   4    8.58    0.61 
   0   2  -5   13.52    0.55 
   0   2  -5   13.23    0.90 
   0  -2   5   13.06    0.72 
   1   2  -6   16.36    0.55 
  -1  -2   6   16.43    0.80 
   2   2  -7   11.75    0.46 
  -2  -2   7   11.31    0.84 
  -3  -2   8   69.37    1.83 
  -4  -2   9   44.15    1.70 
  -5  -2  10    3.42    0.85 
  -6  -2  11   13.77    1.40 
  -7  -2  12    6.41    1.16 
  -8  -2  13   -0.17    0.90 
   9   2 -14    2.49    1.19 
  -9  -2  14   -0.05    0.90 
  10   2 -15    5.14    1.46 
 -10  -2  15    2.54    1.31 
  13  -3  -7    1.27    1.57 
  12  -3  -6   14.11    1.91 
 -11   3   5    2.82    0.75 
  11  -3  -5    3.91    1.38 
 -10   3   4    4.06    0.73 
  10  -3  -4    6.33    1.33 
  -9   3   3    0.39    0.54 
  -9   3   3    0.52    0.58 
   9  -3  -3    0.95    1.09 
  -8   3   2   25.56    1.16 
  -8   3   2   26.15    1.12 
   8  -3  -2   23.53    1.75 
  -7   3   1   10.35    0.77 
  -7   3   1   10.73    0.84 
   7  -3  -1   11.05    1.19 
  -6   3   0    2.19    0.52 
  -6   3   0    2.65    0.43 
   6  -3   0    0.84    0.71 
  -5   3  -1   43.38    1.06 
  -5   3  -1   43.43    1.20 
   5  -3   1   45.58    1.44 
  -4   3  -2    4.99    0.47 
  -4   3  -2    4.90    0.52 
   4  -3   2    5.56    0.63 
  -3   3  -3   55.76    1.19 
  -3   3  -3   55.50    1.25 
   3  -3   3   51.54    1.08 
  -2   3  -4  202.58    2.32 
  -2   3  -4  205.09    2.75 
   2  -3   4  199.83    2.21 
  -1   3  -5   94.17    1.37 
  -1   3  -5   93.31    1.96 
   1  -3   5   93.17    1.42 
   0   3  -6   13.56    1.04 
   0   3  -6   15.26    0.55 
   0  -3   6   13.75    0.75 
   1   3  -7    1.54    0.28 
   1   3  -7    1.28    0.63 
  -1  -3   7    1.39    0.47 
   2   3  -8   54.79    1.85 
   2   3  -8   51.84    0.75 
  -2  -3   8   53.46    1.55 
   3   3  -9   42.97    1.87 
  -3  -3   9   45.78    1.64 
   4   3 -10   -0.67    0.91 
  -4  -3  10    0.98    0.70 
   5   3 -11    6.98    1.24 
  -5  -3  11    9.92    1.22 
   6   3 -12    0.00    1.03 
  -6  -3  12    1.19    0.88 
   7   3 -13    1.53    1.14 
  -7  -3  13    0.59    0.86 
   8   3 -14    0.51    1.12 
  -8  -3  14    0.90    1.00 
   9   3 -15    7.62    1.62 
  -9  -3  15    6.21    1.41 
  13  -4  -6    4.98    1.57 
 -12   4   5   21.91    1.40 
  12  -4  -5   22.06    2.15 
 -11   4   4    0.85    0.65 
  11  -4  -4   -1.51    1.08 
 -10   4   3    1.78    0.65 
 -10   4   3    1.69    0.62 
  10  -4  -3    2.05    1.18 
  -9   4   2    3.86    0.73 
  -9   4   2    4.97    0.71 
   9  -4  -2    2.44    1.18 
  -8   4   1   21.53    1.07 
  -8   4   1   20.43    1.07 
   8  -4  -1   18.80    1.50 
  -7   4   0    1.47    0.47 
  -7   4   0    1.82    0.59 
   7  -4   0    0.65    0.80 
  -6   4  -1   20.70    0.95 
  -6   4  -1   19.61    0.92 
   6  -4   1   21.88    1.22 
  -5   4  -2   24.10    0.96 
  -5   4  -2   25.07    1.02 
   5  -4   2   25.80    1.14 
  -4   4  -3   11.66    0.86 
  -4   4  -3   12.35    0.72 
   4  -4   3   10.13    0.75 
  -3   4  -4   47.06    1.17 
  -3   4  -4   47.35    1.38 
   3  -4   4   45.78    0.90 
  -2   4  -5   35.22    1.44 
  -2   4  -5   35.33    0.95 
   2  -4   5   32.74    0.80 
  -1   4  -6   37.61    1.58 
  -1   4  -6   38.10    0.90 
   1  -4   6   38.57    0.99 
   0   4  -7   38.00    0.83 
   0   4  -7   40.31    1.76 
   0  -4   7   38.74    1.16 
   1   4  -8   14.34    0.52 
   1   4  -8   15.06    1.19 
  -1  -4   8   16.03    0.94 
   2   4  -9   49.34    1.99 
   2   4  -9   43.57    0.67 
  -2  -4   9   45.95    1.48 
   3   4 -10    7.97    1.30 
  -3  -4  10    7.41    0.96 
   4   4 -11    5.99    1.35 
  -4  -4  11    5.16    1.02 
   5   4 -12    7.13    1.35 
  -5  -4  12    7.76    1.16 
   6   4 -13   -2.12    1.06 
  -6  -4  13    1.07    0.92 
   7   4 -14    0.99    1.14 
  -7  -4  14    0.05    0.83 
   8   4 -15    8.32    1.63 
  -8  -4  15    5.19    1.23 
 -13   5   5   -0.51    0.72 
  13  -5  -5    1.82    1.35 
 -12   5   4    2.45    0.77 
  12  -5  -4    4.68    1.36 
 -11   5   3    1.19    0.73 
  11  -5  -3    2.37    1.10 
 -10   5   2    1.73    0.62 
 -10   5   2    2.52    0.72 
  10  -5  -2    1.96    1.06 
  -9   5   1   13.12    1.07 
  -9   5   1   10.95    0.93 
   9  -5  -1   12.28    1.35 
  -8   5   0    0.68    0.51 
  -8   5   0   -0.10    0.57 
   8  -5   0    0.19    0.89 
  -7   5  -1    8.15    0.75 
  -7   5  -1    9.52    0.89 
   7  -5   1    8.89    0.99 
  -6   5  -2   23.54    1.08 
  -6   5  -2   24.14    1.13 
   6  -5   2   20.09    1.22 
  -5   5  -3   26.10    1.08 
  -5   5  -3   26.55    1.14 
   5  -5   3   24.69    0.95 
  -4   5  -4    0.03    0.50 
  -4   5  -4    0.18    0.38 
   4  -5   4   -0.14    0.29 
  -3   5  -5    9.22    0.92 
  -3   5  -5    7.44    0.62 
   3  -5   5    7.34    0.48 
  -2   5  -6   77.85    2.04 
  -2   5  -6   76.06    1.44 
   2  -5   6   76.68    1.27 
  -1   5  -7    1.88    0.79 
  -1   5  -7    0.93    0.37 
   1  -5   7    1.16    0.41 
   0   5  -8    0.63    0.33 
   0   5  -8    0.94    0.84 
   0  -5   8    0.19    0.41 
   1   5  -9    0.45    0.96 
   1   5  -9    1.96    0.31 
  -1  -5   9    2.42    0.61 
   2   5 -10    4.00    1.12 
  -2  -5  10    3.48    0.79 
   3   5 -11    6.43    1.42 
  -3  -5  11    6.96    0.96 
   4   5 -12    0.93    1.23 
  -4  -5  12   -0.17    0.78 
   5   5 -13    1.53    1.26 
  -5  -5  13    0.42    0.86 
   6   5 -14    4.98    1.50 
  -6  -5  14    0.30    0.90 
   7   5 -15    1.06    1.36 
  -7  -5  15    2.43    1.06 
   8   5 -16    6.34    1.79 
  -8  -5  16    6.41    1.49 
 -13   6   4    0.78    0.76 
 -12   6   3   -0.73    0.63 
 -11   6   2    1.15    0.72 
 -11   6   2    0.79    0.63 
 -10   6   1    3.97    0.80 
 -10   6   1    3.99    0.75 
  10  -6  -1    5.81    1.13 
  -9   6   0    0.56    0.57 
  -9   6   0   -0.16    0.52 
   9  -6   0   -0.37    0.80 
  -8   6  -1    0.29    0.56 
  -8   6  -1    0.25    0.62 
   8  -6   1    0.45    0.81 
  -7   6  -2    2.25    0.61 
  -7   6  -2    3.00    0.64 
   7  -6   2    2.09    0.75 
  -6   6  -3    6.15    0.75 
  -6   6  -3    5.22    0.73 
   6  -6   3    6.00    0.66 
  -5   6  -4    5.73    0.74 
  -5   6  -4    5.16    0.67 
   5  -6   4    4.93    0.39 
  -4   6  -5   -0.29    0.43 
  -4   6  -5   -0.54    0.60 
   4  -6   5    0.09    0.21 
  -3   6  -6   25.95    0.96 
  -3   6  -6   24.07    1.41 
   3  -6   6   23.50    0.67 
  -2   6  -7    8.09    1.11 
  -2   6  -7    8.03    0.64 
   2  -6   7    9.81    0.64 
  -1   6  -8    1.47    0.90 
  -1   6  -8    1.46    0.41 
   1  -6   8    1.31    0.48 
   0   6  -9    0.87    1.00 
   0   6  -9    0.47    0.34 
   0  -6   9   -0.04    0.51 
   1   6 -10   -0.53    1.13 
   1   6 -10    0.25    0.29 
  -1  -6  10   -0.29    0.58 
   2   6 -11    9.01    1.59 
  -2  -6  11    9.35    1.05 
   3   6 -12    2.36    1.40 
  -3  -6  12    2.71    0.85 
   4   6 -13   -1.05    1.16 
  -4  -6  13    0.19    0.81 
   5   6 -14   14.41    1.88 
  -5  -6  14   16.33    1.53 
   6   6 -15    2.10    1.40 
  -6  -6  15    1.85    0.97 
   7   6 -16   10.41    1.92 
  -7  -6  16    9.84    1.61 
 -13   7   3   -0.03    0.71 
 -12   7   2    0.38    0.74 
 -11   7   1    0.73    0.64 
 -11   7   1   -0.20    0.70 
 -10   7   0    1.10    0.70 
 -10   7   0   -0.51    0.58 
  -9   7  -1    0.27    0.57 
  -9   7  -1    1.13    0.68 
  -8   7  -2    1.38    0.64 
  -8   7  -2    1.85    0.70 
  -7   7  -3   36.90    1.50 
  -7   7  -3   35.51    1.51 
  -6   7  -4   -1.02    0.59 
  -6   7  -4    0.34    0.53 
  -5   7  -5    2.82    0.80 
  -5   7  -5    1.58    0.57 
  -4   7  -6    2.13    0.87 
  -4   7  -6    3.44    0.62 
  -3   7  -7    0.48    0.85 
  -3   7  -7    0.57    0.45 
   3  -7   7   -0.07    0.31 
  -2   7  -8   -0.26    0.38 
  -2   7  -8    0.66    0.95 
   2  -7   8    0.28    0.41 
  -1   7  -9    1.18    0.42 
  -1   7  -9   -0.05    1.14 
   1  -7   9    1.69    0.57 
   0   7 -10    2.50    0.42 
   0   7 -10    2.31    1.29 
   0  -7  10    2.98    0.71 
   1   7 -11    1.92    1.32 
  -1  -7  11   -0.09    0.65 
   2   7 -12    1.87    1.32 
  -2  -7  12    3.01    0.83 
   3   7 -13    5.13    1.53 
  -3  -7  13    6.79    1.05 
   4   7 -14    5.74    1.62 
  -4  -7  14    4.83    1.05 
   5   7 -15    1.05    1.45 
  -5  -7  15   -0.05    0.80 
   6   7 -16    0.34    1.59 
  -6  -7  16   -2.33    0.94 
 -13   8   2    0.18    0.78 
 -12   8   1    0.67    0.75 
 -11   8   0    6.34    1.04 
 -11   8   0    8.85    1.06 
 -10   8  -1    1.49    0.75 
 -10   8  -1    1.45    0.70 
  -9   8  -2    2.48    0.70 
  -9   8  -2    1.17    0.67 
  -8   8  -3   13.70    1.15 
  -8   8  -3   17.55    1.23 
  -7   8  -4    0.53    0.68 
  -7   8  -4    0.21    0.57 
  -6   8  -5    0.46    0.57 
  -6   8  -5    1.09    0.77 
  -5   8  -6    7.21    0.82 
  -4   8  -7   12.51    0.93 
  -4   8  -7   11.19    1.23 
  -3   8  -8    5.96    0.70 
  -3   8  -8    3.35    1.09 
  -2   8  -9    3.97    0.60 
  -2   8  -9    5.06    1.27 
   2  -8   9    4.99    0.63 
  -1   8 -10    2.56    1.41 
  -1   8 -10    1.55    0.48 
   1  -8  10    1.62    0.65 
   0   8 -11   16.29    1.80 
   0  -8  11   14.41    1.12 
   1   8 -12    1.99    1.41 
  -1  -8  12    3.27    0.81 
   2   8 -13    8.51    1.79 
  -2  -8  13    8.62    1.07 
   3   8 -14    7.29    1.75 
  -3  -8  14    4.75    1.03 
   4   8 -15    6.11    1.79 
  -4  -8  15    0.58    0.95 
   5   8 -16    0.46    1.60 
  -5  -8  16    0.76    1.10 
 -12   9   0    3.75    1.02 
 -11   9  -1    0.93    0.79 
 -11   9  -1    1.24    0.73 
 -10   9  -2    0.54    0.66 
 -10   9  -2    1.41    0.78 
  -9   9  -3    0.22    0.67 
  -9   9  -3    0.97    0.72 
  -8   9  -4   -0.24    0.65 
  -8   9  -4    0.41    0.66 
  -7   9  -5   -0.33    0.71 
  -7   9  -5   -0.44    0.57 
  -6   9  -6   10.30    1.13 
  -6   9  -6   10.86    0.98 
  -5   9  -7    1.72    0.64 
  -5   9  -7    1.90    0.90 
  -4   9  -8    0.34    0.55 
  -4   9  -8   -0.02    1.02 
  -3   9  -9    0.80    1.19 
  -3   9  -9    1.40    0.55 
  -2   9 -10    1.24    1.26 
  -2   9 -10    0.35    0.45 
  -1   9 -11   24.96    2.15 
  -1   9 -11   21.67    0.92 
   1  -9  11   22.67    1.18 
   0   9 -12    0.10    1.24 
   0  -9  12    0.23    0.65 
   1   9 -13   -0.03    1.32 
  -1  -9  13    0.75    0.73 
   2   9 -14   -0.68    1.35 
  -2  -9  14    0.92    0.87 
   3   9 -15    8.45    1.99 
  -3  -9  15    7.95    1.29 
   4   9 -16   -1.37    1.73 
  -4  -9  16   -1.66    0.92 
 -12  10  -1   -0.43    0.78 
 -11  10  -2    0.89    0.82 
 -11  10  -2    0.64    0.74 
 -10  10  -3   -0.18    0.70 
 -10  10  -3    0.08    0.71 
  -9  10  -4   -0.64    0.68 
  -9  10  -4    1.24    0.78 
  -8  10  -5    0.14    0.76 
  -8  10  -5    0.64    0.64 
  -7  10  -6    0.49    0.65 
  -7  10  -6   -0.05    0.78 
  -6  10  -7   -0.70    0.81 
  -6  10  -7    1.23    0.62 
  -5  10  -8    1.18    0.60 
  -5  10  -8    1.64    1.00 
  -4  10  -9    2.81    1.05 
  -4  10  -9    1.36    0.57 
  -3  10 -10    2.46    0.58 
  -3  10 -10    1.70    1.17 
  -2  10 -11   -0.77    1.21 
  -2  10 -11   -0.66    0.41 
  -1  10 -12    3.17    1.48 
   0  10 -13   -1.41    1.43 
   1  10 -14    2.06    1.64 
   2  10 -15    3.27    1.84 
  -2 -10  15    2.34    1.01 
   3  10 -16   -2.34    1.54 
  -3 -10  16   -1.35    0.97 
 -12  11  -2    0.65    0.89 
 -11  11  -3    1.15    0.80 
 -11  11  -3    1.33    0.92 
 -10  11  -4    1.86    0.78 
 -10  11  -4    1.33    0.86 
  -9  11  -5    7.94    1.12 
  -9  11  -5    6.62    1.13 
  -8  11  -6   -0.13    0.61 
  -8  11  -6   -0.02    0.84 
  -7  11  -7    0.91    0.71 
  -7  11  -7    1.62    0.96 
  -6  11  -8    0.36    0.90 
  -6  11  -8    0.79    0.64 
  -5  11  -9    0.08    0.56 
  -5  11  -9   -1.25    0.96 
  -4  11 -10    0.25    0.55 
  -4  11 -10    0.62    1.15 
  -3  11 -11    3.10    1.37 
  -3  11 -11    3.77    0.68 
  -2  11 -12    0.84    1.27 
  -1  11 -13   -1.02    1.29 
   0  11 -14    0.52    1.61 
   1  11 -15   -0.04    1.72 
   2  11 -16    2.23    1.82 
 -11  12  -4    0.30    0.84 
 -11  12  -4    0.43    0.89 
 -10  12  -5    2.59    0.87 
 -10  12  -5    2.27    1.00 
  -9  12  -6    0.87    0.81 
  -9  12  -6    2.94    1.06 
  -8  12  -7   -0.52    0.92 
  -8  12  -7    0.51    0.70 
  -7  12  -8    1.05    1.02 
  -7  12  -8   -0.43    0.63 
  -6  12  -9   -0.31    1.05 
  -6  12  -9    0.49    0.63 
  -5  12 -10    0.35    1.14 
  -5  12 -10    0.87    0.61 
  -4  12 -11    2.26    0.64 
  -4  12 -11    1.71    1.26 
  -3  12 -12   -1.35    1.25 
  -2  12 -13    8.24    1.73 
  -1  12 -14    0.05    1.43 
   0  12 -15   -1.48    1.64 
 -10  13  -6    1.79    0.95 
 -10  13  -6    1.35    1.05 
  -9  13  -7   13.55    1.40 
  -9  13  -7   15.58    1.68 
  -8  13  -8   -0.05    0.96 
  -8  13  -8    0.82    0.70 
  -7  13  -9   -1.64    1.01 
  -7  13  -9    0.27    0.67 
  -6  13 -10    5.31    1.39 
  -6  13 -10    3.38    0.79 
  -5  13 -11   -0.29    1.18 
  -5  13 -11    0.99    0.62 
  -4  13 -12    2.25    1.42 
  -3  13 -13    0.17    1.39 
  -2  13 -14   -2.66    1.45 
  -7  14 -10   -0.17    0.67 
  -7  14 -10   -1.16    1.11 
  -6  14 -11   10.25    1.14 
  -6  14 -11   10.30    1.73 
  -5  14 -12    1.18    1.45 
  -3  15  -8    0.82    1.26 
  -4  15  -7    1.31    1.25 
  -5  15  -6   -0.10    1.07 
  -6  15  -5   -0.09    1.15 
  -7  15  -4   -1.47    0.91 
   0  14 -10    2.13    1.43 
  -1  14  -9   -0.15    1.19 
  -2  14  -8    0.37    1.13 
  -3  14  -7    0.32    1.12 
  -4  14  -6    0.53    1.09 
  -5  14  -5    2.18    1.19 
  -6  14  -4    2.34    1.08 
  -7  14  -3   -1.46    0.87 
  -8  14  -2    0.48    1.04 
  -9  14  -1   -2.15    0.90 
   2  13 -11   -0.80    1.35 
   1  13 -10    1.31    1.41 
   0  13  -9   -0.70    1.19 
  -1  13  -8    1.00    1.12 
  -2  13  -7    0.49    1.12 
  -3  13  -6    3.31    1.14 
  -4  13  -5    2.10    1.03 
  -5  13  -4    0.52    0.95 
  -6  13  -3   -0.09    0.94 
  -7  13  -2    0.09    0.86 
  -8  13  -1   -0.18    0.86 
  -9  13   0    0.31    0.90 
 -10  13   1   -1.18    0.81 
   3  12 -11   -0.17    1.38 
   2  12 -10    0.54    1.36 
   1  12  -9   -1.06    1.25 
   0  12  -8    0.19    1.07 
  -1  12  -7    4.82    1.32 
  -2  12  -6   -0.68    0.91 
  -3  12  -5    0.23    0.98 
  -4  12  -4    1.75    1.01 
  -5  12  -3    5.92    1.20 
  -6  12  -2    4.23    1.09 
  -7  12  -1    1.49    0.90 
  -8  12   0   -0.81    0.84 
  -9  12   1    0.10    0.85 
 -10  12   2    1.56    0.99 
 -11  12   3    1.88    1.01 
   4  11 -11   -0.17    1.50 
   4  11 -11    1.62    1.22 
   3  11 -10    2.60    1.55 
   3  11 -10    5.79    1.39 
   2  11  -9    0.43    1.00 
   2  11  -9   -0.70    1.28 
   1  11  -8    2.79    1.33 
   0  11  -7    0.89    1.04 
  -1  11  -6   12.47    1.50 
  -2  11  -5    5.97    1.21 
  -3  11  -4    0.22    0.83 
  -4  11  -3    0.79    0.79 
  -5  11  -2   -0.61    0.74 
  -6  11  -1   25.65    1.65 
  -7  11   0   -0.44    0.80 
  -8  11   1    0.98    0.93 
  -9  11   2    0.58    0.86 
 -10  11   3    2.48    1.02 
 -11  11   4    0.48    0.89 
   6  10 -12    8.09    1.77 
   6  10 -12    7.30    1.98 
   5  10 -11    1.34    1.61 
   5  10 -11    4.27    1.50 
   4  10 -10    0.85    1.45 
   4  10 -10    1.97    1.21 
   3  10  -9    1.12    1.39 
   3  10  -9    1.53    1.14 
   2  10  -8    5.64    1.26 
   2  10  -8    3.09    1.27 
   1  10  -7    7.07    1.20 
   1  10  -7    5.65    1.27 
   0  10  -6   17.34    1.40 
   0  10  -6   17.83    1.69 
  -1  10  -5    1.74    0.87 
  -1  10  -5    0.55    1.02 
  -2  10  -4    4.19    1.14 
  -3  10  -3   -0.50    0.86 
  -4  10  -2    3.38    0.96 
  -5  10  -1   12.86    1.27 
  -6  10   0   11.65    1.24 
  -7  10   1   15.17    1.37 
  -8  10   2    0.94    0.73 
  -9  10   3    0.51    0.78 
 -10  10   4   -0.65    0.79 
 -11  10   5    5.20    1.18 
   7   9 -12    0.99    1.66 
   7   9 -12    4.98    1.68 
   6   9 -11    5.47    1.78 
   6   9 -11    7.78    1.66 
   5   9 -10   -0.94    1.34 
   5   9 -10    0.90    1.22 
   4   9  -9    1.06    1.14 
   4   9  -9    0.28    1.32 
   3   9  -8    1.21    1.15 
   3   9  -8    0.37    1.06 
   2   9  -7    8.20    1.28 
   2   9  -7    8.46    1.47 
   1   9  -6   -0.06    1.06 
   1   9  -6    0.92    1.03 
   0   9  -5    2.18    1.06 
   0   9  -5    0.42    0.91 
  -1   9  -4   21.07    1.49 
  -1   9  -4   24.67    1.84 
  -2   9  -3   10.73    1.20 
  -2   9  -3   12.03    0.88 
  -3   9  -2    0.43    0.82 
  -3   9  -2   -0.28    0.43 
  -4   9  -1    2.60    0.89 
  -5   9   0   13.87    1.24 
  -6   9   1   -0.09    0.74 
  -7   9   2    1.15    0.79 
  -8   9   3    0.58    0.75 
  -9   9   4   -1.28    0.65 
 -10   9   5    0.19    0.82 
 -11   9   6    1.55    0.94 
 -12   9   7    2.42    1.00 
   7   8 -11   -0.13    1.47 
   7   8 -11    1.65    1.40 
   6   8 -10    1.85    1.49 
   6   8 -10    3.80    1.46 
   5   8  -9    0.53    1.15 
   5   8  -9    1.56    1.36 
   4   8  -8    3.00    1.17 
   4   8  -8    2.45    1.33 
   3   8  -7    0.97    1.07 
   3   8  -7   -1.24    1.15 
   2   8  -6    5.33    1.16 
   2   8  -6    5.33    1.33 
   1   8  -5   22.52    1.63 
   1   8  -5   20.73    1.67 
   0   8  -4   35.37    1.73 
   0   8  -4   36.27    1.82 
  -1   8  -3    3.15    0.92 
  -1   8  -3    2.48    0.75 
  -2   8  -2   16.06    1.03 
  -2   8  -2   14.80    1.19 
  -3   8  -1    1.18    0.74 
  -3   8  -1    0.83    0.42 
  -4   8   0    7.40    0.52 
  -4   8   0    7.14    0.94 
  -5   8   1    3.76    0.48 
  -5   8   1    2.72    0.82 
  -6   8   2    0.18    0.42 
  -6   8   2    0.65    0.70 
  -7   8   3    1.01    0.72 
  -7   8   3    1.85    0.55 
  -8   8   4   -0.29    0.62 
  -8   8   4    0.72    0.58 
  -9   8   5    1.67    0.86 
 -10   8   6    0.73    0.85 
 -11   8   7    6.56    1.17 
 -12   8   8    0.57    0.92 
   8   7 -11    3.12    1.60 
   8   7 -11    3.89    1.54 
   7   7 -10    5.22    1.58 
   7   7 -10    3.49    1.49 
   6   7  -9   -1.36    1.17 
   6   7  -9    0.07    1.28 
   5   7  -8   13.21    1.64 
   5   7  -8   10.74    1.58 
   4   7  -7   32.78    2.39 
   4   7  -7   34.08    2.26 
   3   7  -6    8.97    1.46 
   3   7  -6    6.50    1.28 
   2   7  -5    4.53    1.10 
   2   7  -5    4.24    1.05 
   1   7  -4   24.24    1.52 
   1   7  -4   23.65    1.61 
   0   7  -3   55.39    1.87 
   0   7  -3   57.37    1.82 
  -1   7  -2    2.93    0.72 
  -1   7  -2    3.35    0.68 
  -2   7  -1    0.25    0.57 
  -2   7  -1    0.07    0.47 
  -3   7   0    5.17    0.50 
  -3   7   0    4.20    0.74 
  -4   7   1    6.33    0.51 
  -4   7   1    4.41    0.76 
  -5   7   2    0.48    0.39 
  -5   7   2    0.98    0.61 
  -6   7   3    2.00    0.54 
  -6   7   3    1.30    0.73 
  -7   7   4   25.43    1.55 
  -7   7   4   22.33    1.14 
  -8   7   5    1.31    0.76 
  -8   7   5    0.84    0.62 
  -9   7   6    9.57    1.19 
  -9   7   6    9.14    1.04 
 -10   7   7    2.93    0.84 
 -10   7   7    2.29    0.89 
 -11   7   8   10.03    1.25 
 -11   7   8    9.13    1.27 
 -12   7   9   -0.75    0.86 
   9   6 -11    1.50    1.51 
   8   6 -10   -0.31    1.36 
   8   6 -10    3.26    1.41 
   7   6  -9    4.66    1.49 
   7   6  -9    4.13    1.36 
   6   6  -8    2.83    1.30 
   6   6  -8    2.53    1.24 
   5   6  -7    4.61    1.33 
   5   6  -7    3.75    1.32 
   4   6  -6   14.62    1.56 
   4   6  -6   14.00    1.53 
   3   6  -5    5.52    1.16 
   3   6  -5    8.77    1.28 
   2   6  -4    9.33    1.09 
   2   6  -4    7.99    1.05 
   1   6  -3  118.35    2.53 
   1   6  -3  112.17    2.55 
   0   6  -2   99.02    2.11 
   0   6  -2   97.01    2.22 
  -1   6  -1    4.78    0.72 
  -1   6  -1    4.51    0.63 
  -2   6   0    8.01    0.62 
  -2   6   0    6.06    0.78 
  -3   6   1    8.50    0.67 
  -3   6   1    8.70    0.82 
  -4   6   2    1.59    0.41 
  -4   6   2    0.85    0.53 
  -5   6   3   29.99    1.42 
  -5   6   3   26.95    1.04 
  -6   6   4    6.58    0.91 
  -6   6   4    6.15    0.72 
  -7   6   5    6.43    0.94 
  -7   6   5    6.90    0.84 
  -8   6   6    3.49    0.85 
  -8   6   6    1.99    0.70 
  -9   6   7   15.52    1.29 
 -10   6   8   16.38    1.43 
 -10   6   8   14.82    1.44 
 -11   6   9    6.77    1.14 
 -11   6   9    5.76    1.15 
 -12   6  10    0.28    0.91 
  10   5 -11    6.14    1.76 
   9   5 -10   11.53    1.76 
   9   5 -10   13.50    2.10 
   8   5  -9   12.78    1.74 
   8   5  -9   13.82    1.94 
   7   5  -8    3.15    1.34 
   7   5  -8    0.72    1.16 
   6   5  -7   12.24    1.53 
   6   5  -7   11.19    1.62 
   5   5  -6    6.76    1.41 
   5   5  -6    8.76    1.38 
  -4  -5   5   32.72    0.77 
   4   5  -5   31.04    2.06 
   4   5  -5   32.09    1.91 
   3   5  -4    0.12    0.81 
   3   5  -4    0.54    0.84 
   2   5  -3   19.16    1.39 
   2   5  -3   17.66    1.38 
   1   5  -2    5.65    0.84 
   1   5  -2    5.89    0.80 
   0   5  -1    3.86    0.66 
   0   5  -1    3.00    0.58 
  -1   5   0    2.19    0.52 
  -1   5   0    1.79    0.49 
  -2   5   1   29.60    1.21 
  -2   5   1   29.82    0.95 
  -3   5   2   37.53    1.03 
  -3   5   2   37.64    1.34 
  -4   5   3   31.06    1.24 
  -4   5   3   30.15    1.00 
  -5   5   4   26.19    1.25 
  -5   5   4   26.25    1.03 
  -6   5   5   32.71    1.48 
  -6   5   5   31.85    1.33 
  -7   5   6   36.78    1.63 
  -7   5   6   34.33    1.43 
  -8   5   7    1.84    0.75 
  -8   5   7    2.24    0.77 
  -9   5   8   46.07    1.88 
  -9   5   8   49.14    2.00 
 -10   5   9   18.31    1.51 
 -10   5   9   15.87    1.45 
 -11   5  10    2.22    0.93 
 -12   5  11    1.52    1.02 
  10   4 -10    3.11    1.63 
   9   4  -9   14.23    1.67 
   9   4  -9   14.34    2.04 
   8   4  -8    5.92    1.29 
   8   4  -8    3.58    1.31 
   7   4  -7    1.87    1.06 
   7   4  -7    0.51    1.06 
   6   4  -6    4.19    1.15 
   6   4  -6    4.01    1.25 
  -5  -4   5   23.35    0.69 
   5   4  -5   23.32    1.79 
   5   4  -5   24.26    1.75 
  -4  -4   4   15.22    0.61 
   4   4  -4   16.79    1.23 
   4   4  -4   14.75    1.40 
   3   4  -3   34.87    1.73 
   3   4  -3   36.65    1.60 
   2   4  -2   20.51    1.30 
   2   4  -2   24.36    1.41 
   1   4  -1   96.42    2.07 
   1   4  -1   97.94    1.87 
   0   4   0   14.22    0.98 
   0   4   0   16.35    0.91 
  -1   4   1  107.79    1.88 
  -1   4   1  106.97    1.71 
  -2   4   2    1.66    0.44 
  -2   4   2    0.88    0.39 
  -3   4   3    0.31    0.36 
  -3   4   3   -0.08    0.38 
  -4   4   4   59.18    1.64 
  -4   4   4   61.50    1.41 
  -5   4   5    7.33    0.79 
  -5   4   5    9.16    0.78 
  -6   4   6    1.25    0.59 
  -6   4   6    1.97    0.64 
  -7   4   7    1.01    0.67 
  -7   4   7    0.93    0.73 
  -8   4   8    2.23    0.80 
  -8   4   8    2.62    0.76 
  -9   4   9   14.43    1.37 
  -9   4   9   15.29    1.39 
 -10   4  10   11.15    1.34 
 -11   4  11   -0.30    0.82 
  11   3 -10    1.02    1.50 
  10   3  -9   11.14    1.93 
   9   3  -8    3.93    1.39 
   9   3  -8    5.87    1.23 
   8   3  -7    1.87    1.29 
   8   3  -7   -0.75    0.92 
   7   3  -6    5.80    1.15 
   7   3  -6    4.71    1.34 
  -6  -3   5    8.44    0.58 
   6   3  -5    9.56    1.44 
   6   3  -5    9.15    1.10 
  -5  -3   4   32.80    0.82 
   5   3  -4   34.24    1.83 
   5   3  -4   32.23    1.52 
  -4  -3   3    0.05    0.30 
   4   3  -3    0.06    0.70 
   4   3  -3   -0.56    0.65 
  -3  -3   2   39.55    0.86 
   3   3  -2   39.85    1.35 
   3   3  -2   39.59    1.69 
   2   3  -1    0.07    0.47 
   2   3  -1   -0.18    0.62 
   1   3   0   12.87    1.02 
   1   3   0   12.06    0.75 
   0   3   1   34.68    1.00 
   0   3   1   36.14    1.18 
  -1   3   2   89.71    1.55 
  -1   3   2   90.76    1.58 
  -2   3   3  231.59    2.80 
  -2   3   3  231.86    2.94 
  -3   3   4    2.09    0.50 
  -3   3   4    2.09    0.46 
  -4   3   5   21.99    1.04 
  -4   3   5   22.63    1.05 
  -5   3   6   35.54    1.38 
  -5   3   6   39.06    1.38 
  -6   3   7    2.53    0.64 
  -6   3   7    2.48    0.70 
  -7   3   8   13.41    1.19 
  -7   3   8   15.22    1.25 
  -8   3   9   17.13    1.39 
  -8   3   9   16.02    1.36 
  -9   3  10   13.46    1.38 
 -10   3  11    0.31    0.90 
 -11   3  12    4.02    1.15 
  11   2  -9    2.24    1.47 
  10   2  -8    3.56    1.52 
   9   2  -7    4.90    1.08 
   9   2  -7    4.56    1.49 
   8   2  -6    1.14    0.89 
   8   2  -6    0.62    1.16 
  -7  -2   5    0.42    0.42 
   7   2  -5   -1.48    0.76 
   7   2  -5   -0.99    1.01 
  -6  -2   4   28.83    0.88 
   6   2  -4   27.92    1.98 
   6   2  -4   28.25    1.44 
  -5  -2   3    2.14    0.38 
   5   2  -3    1.50    0.91 
   5   2  -3    1.54    0.61 
  -4  -2   2    0.96    0.34 
   4   2  -2    0.52    0.52 
   4   2  -2    0.42    0.69 
  -3  -2   1    1.01    0.33 
   3   2  -1    1.30    0.48 
   3   2  -1    0.98    0.63 
   2   2   0   -0.03    0.66 
   2   2   0    0.51    0.40 
   1   2   1   40.05    0.85 
   1   2   1   39.59    1.32 
   0   2   2 1000.00    8.43 
   0   2   2  973.08    9.71 
  -1   2   3  267.16    2.98 
  -1   2   3  268.29    3.05 
  -2   2   4   10.25    0.76 
  -2   2   4    9.42    0.75 
  -3   2   5    0.59    0.39 
  -3   2   5    0.35    0.41 
  -4   2   6    4.88    0.67 
  -4   2   6    4.52    0.61 
  -5   2   7    9.90    0.91 
  -5   2   7    9.94    0.95 
  -6   2   8   -0.59    0.61 
  -6   2   8    0.40    0.61 
  -7   2   9    8.13    1.06 
  -8   2  10    7.64    1.11 
  -9   2  11    4.35    1.09 
 -10   2  12    1.08    0.95 
 -11   2  13    1.32    1.08 
  12   1  -9   -0.12    1.61 
  11   1  -8    8.90    1.85 
  10   1  -7    0.66    1.37 
   9   1  -6    1.61    1.28 
   9   1  -6    3.30    0.89 
  -8  -1   5    4.00    0.61 
   8   1  -5    4.59    0.90 
   8   1  -5    5.04    1.43 
  -7  -1   4   -0.41    0.41 
   7   1  -4    0.74    1.02 
  -6  -1   3    0.89    0.41 
   6   1  -3    0.36    0.87 
   6   1  -3    0.98    0.55 
  -5  -1   2   14.42    0.66 
   5   1  -2   15.15    0.88 
   5   1  -2   11.21    1.13 
  -4  -1   1    1.31    0.37 
   4   1  -1    2.05    0.70 
   4   1  -1    1.72    0.39 
  -3  -1   0    1.50    0.36 
   3   1   0    1.76    0.36 
   3   1   0    1.23    0.63 
  -2  -1  -1   34.83    0.86 
   2   1   1   33.56    1.31 
   2   1   1   33.80    0.56 
   1   1   2   87.51    1.06 
   1   1   2   82.03    1.61 
   0   1   3   16.09    0.63 
   0   1   3   16.13    0.85 
  -1   1   4  208.56    2.64 
  -1   1   4  209.37    2.53 
  -2   1   5    5.08    0.52 
  -2   1   5    6.32    0.61 
  -3   1   6   35.74    1.26 
  -3   1   6   35.59    1.18 
  -4   1   7    0.08    0.51 
  -4   1   7    0.01    0.44 
  -5   1   8    3.70    0.70 
  -6   1   9    2.43    0.75 
  -7   1  10   -0.09    0.77 
  -8   1  11   16.50    1.46 
  -9   1  12   -0.06    0.82 
 -10   1  13    5.62    1.25 
 -11   1  14    1.14    1.13 
  12   0  -8    2.07    1.64 
  11   0  -7    4.26    1.56 
  10   0  -6    1.57    1.34 
  -9   0   5    3.47    0.64 
   9   0  -5    2.61    1.30 
  -8   0   4    0.38    0.53 
   8   0  -4    0.12    1.17 
  -7   0   3    0.51    0.48 
   7   0  -3   -0.38    1.01 
  -6   0   2    5.39    0.58 
  -5   0   1    0.73    0.39 
   5   0  -1    0.92    0.72 
  -4   0   0   26.12    0.80 
   4   0   0   26.00    1.38 
  -3   0  -1    1.71    0.39 
   3   0   1    0.33    0.65 
  -2   0  -2    3.86    0.45 
   2   0   2    4.42    0.70 
   1   0   3   17.14    1.04 
   0   0   4   18.36    0.93 
  -1   0   5   27.39    0.96 
  -2   0   6    1.14    0.46 
  -3   0   7   83.43    1.85 
  -4   0   8    1.51    0.62 
  -5   0   9   -0.12    0.65 
  -6   0  10    3.55    0.93 
  -7   0  11    9.43    1.22 
  -8   0  12    1.90    0.97 
  -9   0  13    1.39    0.93 
 -10   0  14    1.53    1.04 
  12  -1  -7    3.44    1.61 
  11  -1  -6    0.83    1.26 
 -10   1   5    5.25    0.73 
  10  -1  -5    8.00    1.55 
  -9   1   4    1.67    0.59 
   9  -1  -4    1.20    1.24 
  -8   1   3   17.98    0.98 
   8  -1  -3   17.80    1.71 
  -7   1   2   -0.62    0.46 
   7  -1  -2   -0.70    0.94 
  -6   1   1    2.34    0.49 
   6  -1  -1    0.72    0.82 
  -5   1   0   39.51    0.83 
  -5   1   0   39.42    1.08 
   5  -1   0   41.11    1.63 
  -4   1  -1   24.82    0.81 
  -4   1  -1   24.49    0.53 
   4  -1   1   24.87    1.30 
  -3   1  -2    0.61    0.35 
  -3   1  -2    0.86    0.19 
   3  -1   2    0.77    0.60 
  -2   1  -3    7.88    0.50 
  -2   1  -3    6.95    0.51 
   2  -1   3    6.99    0.61 
  -1   1  -4   13.69    0.82 
  -1   1  -4   14.37    0.64 
   1  -1   4   14.76    0.84 
   0  -1   5    8.88    0.66 
  -1  -1   6   30.70    1.03 
  -2  -1   7   10.45    0.83 
  -3  -1   8   11.10    0.92 
  -4  -1   9    2.33    0.68 
  -5  -1  10    4.41    0.84 
  -6  -1  11   15.03    1.39 
  -7  -1  12    1.75    0.91 
  -8  -1  13    3.05    1.01 
  -9  -1  14    1.75    1.10 
 -10  -1  15    0.82    1.10 
  13  -2  -7    0.36    1.49 
  12  -2  -6    1.00    1.27 
 -11   2   5    2.68    0.72 
  11  -2  -5    1.03    1.29 
 -10   2   4    1.16    0.60 
  10  -2  -4    0.72    1.17 
  -9   2   3    8.56    0.86 
   9  -2  -3    8.08    1.46 
  -8   2   2    2.50    0.61 
   8  -2  -2   -0.51    1.03 
  -7   2   1   14.06    0.90 
  -7   2   1   11.91    0.70 
   7  -2  -1   12.81    1.31 
  -6   2   0   -0.30    0.42 
  -6   2   0    0.12    0.30 
   6  -2   0    0.58    0.71 
  -5   2  -1    8.57    0.65 
  -5   2  -1    8.53    0.52 
   5  -2   1    7.97    0.89 
  -4   2  -2   12.18    0.72 
  -4   2  -2   13.79    0.55 
   4  -2   2   13.02    1.00 
  -3   2  -3   16.60    0.72 
  -3   2  -3   17.56    0.71 
   3  -2   3   16.52    0.91 
  -2   2  -4    0.87    0.38 
  -2   2  -4    1.17    0.48 
   2  -2   4    1.01    0.42 
  -1   2  -5    3.40    0.55 
  -1   2  -5    3.74    0.44 
   1  -2   5    2.98    0.45 
   0   2  -6    3.06    0.55 
   0   2  -6    3.72    0.41 
   0  -2   6    4.69    0.54 
   1   2  -7    4.38    0.41 
  -1  -2   7    4.32    0.59 
   2   2  -8   13.03    0.57 
  -2  -2   8   11.99    0.90 
  -3  -2   9    1.01    0.58 
  -4  -2  10    1.94    0.72 
  -5  -2  11   -0.47    0.69 
  -6  -2  12    4.69    1.03 
  -7  -2  13    3.74    1.01 
  -8  -2  14    2.47    1.07 
   9   2 -15    1.64    1.19 
  -9  -2  15    0.56    1.06 
  13  -3  -6    4.91    1.62 
 -12   3   5    0.96    0.69 
  12  -3  -5    0.84    1.30 
 -11   3   4    0.11    0.56 
  11  -3  -4   -0.37    1.18 
 -10   3   3    1.08    0.63 
  10  -3  -3    2.60    1.16 
  -9   3   2    1.43    0.62 
  -9   3   2    1.12    0.52 
   9  -3  -2    0.53    1.11 
  -8   3   1    1.30    0.59 
  -8   3   1    1.06    0.47 
   8  -3  -1   -0.62    0.96 
  -7   3   0    6.30    0.57 
  -7   3   0    4.52    0.65 
   7  -3   0    5.07    0.99 
  -6   3  -1    1.27    0.47 
  -6   3  -1    1.18    0.36 
   6  -3   1    2.20    0.74 
  -5   3  -2    8.16    0.70 
  -5   3  -2    8.58    0.60 
   5  -3   2    9.46    0.87 
  -4   3  -3    4.39    0.48 
  -4   3  -3    3.82    0.53 
   4  -3   3    3.71    0.61 
  -3   3  -4    2.99    0.51 
  -3   3  -4    2.78    0.48 
   3  -3   4    2.92    0.47 
  -2   3  -5    0.84    0.54 
  -2   3  -5    0.54    0.34 
   2  -3   5    1.30    0.38 
  -1   3  -6    5.64    0.74 
  -1   3  -6    5.48    0.48 
   1  -3   6    6.02    0.54 
   0   3  -7   69.54    1.80 
   0   3  -7   70.05    1.19 
   0  -3   7   70.46    1.49 
   1   3  -8    0.18    0.30 
   1   3  -8   -0.21    0.63 
  -1  -3   8   -0.68    0.42 
   2   3  -9    7.80    0.48 
   2   3  -9    8.58    1.01 
  -2  -3   9    7.46    0.84 
   3   3 -10    6.41    1.09 
   3   3 -10    8.31    0.46 
  -3  -3  10    9.19    1.01 
   4   3 -11    6.06    1.16 
  -4  -3  11    4.82    0.91 
   5   3 -12   -0.22    1.07 
  -5  -3  12    0.35    0.74 
   6   3 -13    4.31    1.16 
  -6  -3  13    4.40    1.06 
   7   3 -14    0.14    1.03 
  -7  -3  14    0.90    0.91 
   8   3 -15    1.84    1.15 
  -8  -3  15    0.61    0.98 
   9   3 -16    2.48    1.44 
  -9  -3  16    1.26    1.21 
  13  -4  -5    3.09    1.42 
 -12   4   4    1.37    0.77 
  12  -4  -4    2.69    1.27 
 -11   4   3    1.05    0.64 
  11  -4  -3    1.95    1.17 
 -10   4   2    0.10    0.53 
 -10   4   2    0.74    0.61 
  10  -4  -2    1.09    1.08 
  -9   4   1    0.55    0.49 
  -9   4   1   -0.51    0.56 
   9  -4  -1    1.32    1.04 
  -8   4   0   12.86    0.90 
  -8   4   0   13.01    1.03 
   8  -4   0   12.60    1.32 
  -7   4  -1    7.69    0.82 
  -7   4  -1    8.59    0.67 
   7  -4   1    7.55    1.04 
  -6   4  -2   12.81    0.84 
  -6   4  -2   15.04    0.84 
   6  -4   2   11.99    1.01 
  -5   4  -3   12.67    0.85 
  -5   4  -3   12.95    0.80 
   5  -4   3   13.37    1.05 
  -4   4  -4   10.72    0.73 
  -4   4  -4    9.76    0.73 
   4  -4   4    9.55    0.67 
  -3   4  -5   17.66    0.84 
  -3   4  -5   18.47    1.21 
   3  -4   5   17.10    0.73 
  -2   4  -6   84.32    2.03 
  -2   4  -6   82.12    1.50 
   2  -4   6   82.11    1.43 
  -1   4  -7    0.26    0.36 
  -1   4  -7    0.00    0.72 
   1  -4   7    0.12    0.38 
   0   4  -8    2.52    0.40 
   0   4  -8    2.73    0.80 
   0  -4   8    2.19    0.51 
   1   4  -9    0.23    0.75 
   1   4  -9    0.73    0.32 
  -1  -4   9    0.95    0.54 
   2   4 -10    0.53    0.28 
   2   4 -10    0.04    0.88 
  -2  -4  10    0.30    0.60 
   3   4 -11   -1.55    1.01 
  -3  -4  11    0.07    0.68 
   4   4 -12   -0.16    1.06 
  -4  -4  12   -0.67    0.68 
   5   4 -13   -0.67    0.93 
  -5  -4  13   -0.30    0.80 
   6   4 -14    5.64    1.46 
  -6  -4  14    4.11    1.12 
   7   4 -15    2.83    1.38 
  -7  -4  15    3.89    1.07 
   8   4 -16    2.34    1.45 
  -8  -4  16    0.58    1.11 
 -13   5   4    7.31    1.11 
 -12   5   3    2.02    0.76 
  12  -5  -3    2.31    1.27 
 -11   5   2    0.33    0.66 
  11  -5  -2    3.20    1.18 
 -10   5   1    5.11    0.74 
 -10   5   1    3.97    0.81 
  10  -5  -1    5.69    1.20 
  -9   5   0    5.11    0.81 
  -9   5   0    5.87    0.74 
   9  -5   0    7.85    1.21 
  -8   5  -1   -0.25    0.54 
  -8   5  -1    0.60    0.48 
   8  -5   1    0.23    0.97 
  -7   5  -2   -0.73    0.53 
  -7   5  -2    0.12    0.45 
   7  -5   2   -0.05    0.75 
  -6   5  -3    1.00    0.49 
  -6   5  -3    0.37    0.52 
   6  -5   3    0.65    0.65 
  -5   5  -4    0.24    0.47 
  -5   5  -4    0.48    0.45 
   5  -5   4    0.22    0.49 
  -4   5  -5    2.16    0.50 
  -4   5  -5    2.31    0.64 
   4  -5   5    1.97    0.40 
  -3   5  -6   13.50    0.76 
  -3   5  -6   14.05    1.09 
   3  -5   6   15.14    0.68 
  -2   5  -7   61.98    1.36 
  -2   5  -7   63.90    2.07 
   2  -5   7   62.98    1.27 
  -1   5  -8   24.33    1.73 
  -1   5  -8   21.41    0.82 
   1  -5   8   21.32    0.90 
   0   5  -9    0.38    0.87 
   0   5  -9    0.23    0.35 
   0  -5   9    0.47    0.52 
   1   5 -10   46.43    0.94 
   1   5 -10   43.69    2.37 
  -1  -5  10   46.11    1.56 
   2   5 -11   16.53    1.63 
  -2  -5  11   19.94    1.32 
   3   5 -12   10.23    1.61 
  -3  -5  12    9.69    1.10 
   4   5 -13    2.94    1.30 
  -4  -5  13    4.11    0.92 
   5   5 -14    2.16    1.25 
  -5  -5  14    1.07    0.92 
   6   5 -15    3.56    1.48 
  -6  -5  15    3.88    1.12 
   7   5 -16    0.23    1.27 
  -7  -5  16    0.75    1.03 
 -13   6   3   22.32    1.54 
 -12   6   2    6.90    1.04 
 -11   6   1    0.20    0.67 
 -10   6   0    7.28    0.85 
 -10   6   0    5.77    0.91 
  10  -6   0    6.41    1.16 
  -9   6  -1   -0.21    0.55 
  -9   6  -1   -0.17    0.50 
   9  -6   1    0.65    0.86 
  -8   6  -2    7.48    0.81 
  -8   6  -2    7.29    0.91 
   8  -6   2    9.82    1.11 
  -7   6  -3   15.17    1.06 
  -7   6  -3   15.53    1.08 
   7  -6   3   16.34    1.29 
  -6   6  -4   24.11    1.15 
  -6   6  -4   25.21    1.22 
   6  -6   4   25.46    1.06 
  -5   6  -5    7.87    0.78 
  -5   6  -5    7.96    0.86 
   5  -6   5    7.80    0.52 
  -4   6  -6   -0.64    0.67 
  -4   6  -6   -0.06    0.44 
   4  -6   6    0.21    0.30 
  -3   6  -7   31.51    1.76 
  -3   6  -7   34.23    1.17 
   3  -6   7   33.41    0.90 
  -2   6  -8   37.96    2.03 
  -2   6  -8   39.00    1.17 
   2  -6   8   37.81    1.11 
  -1   6  -9   -0.54    0.38 
  -1   6  -9    1.04    1.06 
   1  -6   9   -0.25    0.46 
   0   6 -10   -0.02    0.36 
   0   6 -10    0.43    1.08 
   0  -6  10    0.74    0.55 
   1   6 -11   68.37    1.16 
   1   6 -11   67.56    2.79 
  -1  -6  11   66.50    1.91 
   2   6 -12    8.73    1.62 
  -2  -6  12    8.59    1.05 
   3   6 -13    0.01    1.27 
  -3  -6  13    1.81    0.83 
   4   6 -14    3.01    1.43 
  -4  -6  14    2.52    0.94 
   5   6 -15   19.26    2.18 
  -5  -6  15   13.05    1.45 
   6   6 -16    4.60    1.56 
  -6  -6  16    6.52    1.26 
   7   6 -17    0.29    1.51 
  -7  -6  17    1.28    1.08 
 -13   7   2   11.03    1.27 
 -12   7   1    1.00    0.79 
 -11   7   0    0.17    0.68 
 -10   7  -1    1.96    0.67 
 -10   7  -1    1.33    0.73 
  -9   7  -2    0.13    0.53 
  -9   7  -2    0.52    0.60 
  -8   7  -3    0.11    0.57 
  -8   7  -3    0.98    0.61 
  -7   7  -4    2.19    0.67 
  -7   7  -4    1.43    0.67 
  -6   7  -5   46.07    1.68 
  -6   7  -5   42.58    1.57 
  -5   7  -6   -0.08    0.72 
  -5   7  -6   -0.05    0.55 
  -4   7  -7    8.45    1.09 
  -4   7  -7    7.61    0.75 
   4  -7   7    7.01    0.46 
  -3   7  -8   74.26    2.39 
  -3   7  -8   72.43    1.68 
   3  -7   8   73.89    1.37 
  -2   7  -9   40.97    2.14 
  -2   7  -9   36.80    1.17 
   2  -7   9   39.88    1.17 
  -1   7 -10   10.15    0.71 
  -1   7 -10   12.58    1.59 
   1  -7  10   11.31    0.86 
   0   7 -11    5.54    0.55 
   0   7 -11    4.68    1.37 
   0  -7  11    4.91    0.79 
   1   7 -12   24.25    2.09 
  -1  -7  12   26.76    1.47 
   2   7 -13    0.76    1.36 
   3   7 -14    3.52    1.46 
  -3  -7  14    0.20    0.80 
   4   7 -15    8.31    1.82 
  -4  -7  15    6.75    1.16 
   5   7 -16   -0.24    1.57 
  -5  -7  16   -1.39    0.83 
   6   7 -17   -1.11    1.64 
  -6  -7  17    0.39    1.09 
 -13   8   1   18.72    1.59 
 -12   8   0    1.96    0.87 
 -11   8  -1   18.19    1.45 
 -10   8  -2    3.26    0.82 
 -10   8  -2    3.99    0.80 
  -9   8  -3    1.01    0.65 
  -9   8  -3    0.79    0.67 
  -8   8  -4    0.49    0.64 
  -8   8  -4    2.29    0.74 
  -7   8  -5   33.10    1.45 
  -7   8  -5   30.55    1.54 
  -6   8  -6   36.59    1.73 
  -6   8  -6   38.99    1.54 
  -5   8  -7    3.48    0.71 
  -5   8  -7    4.48    1.00 
  -4   8  -8   52.41    1.56 
  -4   8  -8   52.63    2.30 
  -3   8  -9   11.63    0.88 
  -3   8  -9   14.56    1.57 
  -2   8 -10   17.95    1.76 
  -2   8 -10   21.12    0.99 
   2  -8  10   21.01    1.03 
  -1   8 -11   -0.49    1.28 
  -1   8 -11    0.12    0.42 
   1  -8  11    0.50    0.61 
   0   8 -12   25.90    2.18 
   0  -8  12   27.09    1.36 
   1   8 -13    4.30    1.54 
  -1  -8  13    4.19    0.90 
   2   8 -14    0.88    1.41 
  -2  -8  14    1.91    0.86 
   3   8 -15    5.78    1.78 
  -3  -8  15    3.49    0.98 
   4   8 -16   -0.14    1.63 
  -4  -8  16    0.61    0.90 
   5   8 -17    1.18    1.88 
  -5  -8  17    5.88    1.28 
 -12   9  -1    5.43    1.12 
 -11   9  -2    4.92    1.05 
 -10   9  -3    4.41    0.87 
 -10   9  -3    4.50    0.91 
  -9   9  -4    1.26    0.74 
  -9   9  -4   -0.25    0.64 
  -8   9  -5   16.11    1.30 
  -8   9  -5   15.58    1.26 
  -7   9  -6   20.58    1.44 
  -7   9  -6   18.22    1.19 
  -6   9  -7    6.73    0.89 
  -6   9  -7    6.84    1.07 
  -5   9  -8    2.28    0.61 
  -5   9  -8    0.65    0.94 
  -4   9  -9   17.54    1.08 
  -4   9  -9   14.84    1.51 
  -3   9 -10    4.91    1.23 
  -3   9 -10    4.43    0.64 
  -2   9 -11    1.82    1.31 
  -2   9 -11    4.14    0.61 
  -1   9 -12    2.09    1.30 
   0   9 -13    3.35    1.48 
   0  -9  13    3.94    0.84 
   1   9 -14    0.41    1.51 
  -1  -9  14    1.47    0.80 
   2   9 -15   15.38    2.24 
  -2  -9  15   15.88    1.42 
   3   9 -16   13.17    2.20 
  -3  -9  16   14.64    1.47 
   4   9 -17    0.45    1.86 
  -4  -9  17    3.09    1.17 
 -12  10  -2    9.42    1.28 
 -11  10  -3    5.72    1.10 
 -10  10  -4   -0.77    0.70 
 -10  10  -4    0.82    0.75 
  -9  10  -5   10.21    1.18 
  -9  10  -5    9.77    1.19 
  -8  10  -6    7.47    1.11 
  -8  10  -6    8.16    1.04 
  -7  10  -7    3.01    0.78 
  -7  10  -7    4.12    1.02 
  -6  10  -8   -0.04    0.56 
  -6  10  -8   -2.48    0.79 
  -5  10  -9   13.12    1.05 
  -5  10  -9   14.78    1.53 
  -4  10 -10    1.82    0.61 
  -4  10 -10    1.37    1.18 
  -3  10 -11    2.52    0.61 
  -3  10 -11    3.24    1.33 
  -2  10 -12   -1.07    1.27 
  -1  10 -13    5.22    1.59 
   0  10 -14   10.83    1.93 
   1  10 -15    1.31    1.54 
   2  10 -16    7.74    2.15 
   3  10 -17    2.49    1.87 
  -3 -10  17    3.35    1.19 
 -11  11  -4   -0.73    0.76 
 -10  11  -5    0.81    0.89 
 -10  11  -5   -0.14    0.79 
  -9  11  -6   -0.28    0.81 
  -9  11  -6    0.99    0.83 
  -8  11  -7    8.77    1.10 
  -8  11  -7    8.31    1.24 
  -7  11  -8   -0.14    0.91 
  -7  11  -8   -0.66    0.55 
  -6  11  -9    2.31    1.12 
  -6  11  -9    3.66    0.79 
  -5  11 -10   -0.71    1.02 
  -5  11 -10    0.38    0.60 
  -4  11 -11    0.44    0.58 
  -4  11 -11   -1.31    1.16 
  -3  11 -12   -1.36    1.14 
  -3  11 -12    0.26    0.51 
  -2  11 -13    3.28    1.45 
  -1  11 -14   -0.91    1.50 
   0  11 -15    3.25    1.82 
   1  11 -16   -0.22    1.83 
 -11  12  -5   -0.06    0.85 
 -10  12  -6    1.57    0.87 
 -10  12  -6    0.03    0.88 
  -9  12  -7    7.62    1.27 
  -9  12  -7    7.99    1.18 
  -8  12  -8    1.89    1.03 
  -8  12  -8    1.69    0.82 
  -7  12  -9    0.62    0.70 
  -7  12  -9   -0.51    0.97 
  -6  12 -10    1.22    1.15 
  -6  12 -10    3.20    0.78 
  -5  12 -11    6.89    1.45 
  -5  12 -11    5.67    0.84 
  -4  12 -12    1.06    0.61 
  -4  12 -12   -0.31    1.12 
  -3  12 -13    0.37    1.38 
  -2  12 -14    1.67    1.59 
  -1  12 -15   -0.97    1.63 
   0  12 -16    0.10    1.85 
  -9  13  -8    3.06    0.96 
  -9  13  -8    1.48    1.12 
  -8  13  -9   -0.96    1.01 
  -8  13  -9    0.70    0.75 
  -7  13 -10   -0.36    1.07 
  -7  13 -10   -0.49    0.65 
  -6  13 -11    0.04    1.09 
  -6  13 -11    1.04    0.68 
  -5  13 -12   -2.23    1.17 
  -5  13 -12    0.37    0.62 
  -4  13 -13   -0.43    1.37 
  -3  13 -14    0.57    1.44 
  -2  13 -15   -0.13    1.73 
  -2  15  -8    0.27    1.31 
  -3  15  -7    8.62    1.57 
  -4  15  -6    2.76    1.30 
  -5  15  -5    0.54    1.04 
  -6  15  -4    4.95    1.41 
  -7  15  -3    4.05    1.33 
   0  14  -9    1.90    1.31 
  -1  14  -8   -0.99    1.05 
  -2  14  -7    1.94    1.14 
  -3  14  -6    8.54    1.52 
  -4  14  -5   -0.35    0.94 
  -5  14  -4   -1.26    0.87 
  -6  14  -3    5.89    1.35 
  -7  14  -2   11.47    1.59 
  -8  14  -1   -1.38    0.91 
  -9  14   0    1.31    1.17 
   2  13 -10    2.02    1.39 
   1  13  -9    7.82    1.57 
   0  13  -8    2.17    1.16 
  -1  13  -7   -0.60    1.06 
  -2  13  -6    4.85    1.30 
  -3  13  -5    3.98    1.18 
  -4  13  -4    1.36    1.00 
  -5  13  -3    1.04    0.93 
  -6  13  -2    0.45    0.90 
  -7  13  -1    1.93    1.02 
  -8  13   0    2.12    1.05 
  -9  13   1   -0.82    0.81 
 -10  13   2    0.20    0.98 
   3  12 -10    2.62    1.40 
   2  12  -9    1.68    1.40 
   1  12  -8   -1.41    1.11 
   0  12  -7    2.17    1.14 
  -1  12  -6    2.35    1.09 
  -2  12  -5    0.33    1.04 
  -3  12  -4    0.48    0.91 
  -4  12  -3    5.56    1.12 
  -5  12  -2    6.35    1.15 
  -6  12  -1    3.66    1.04 
  -7  12   0    0.55    0.82 
  -8  12   1    8.70    1.35 
  -9  12   2    9.69    1.41 
 -10  12   3    0.10    0.93 
   5  11 -11    2.30    1.47 
   5  11 -11    2.25    1.59 
   4  11 -10    0.20    1.40 
   4  11 -10    0.70    1.32 
   3  11  -9    5.54    1.44 
   3  11  -9    4.51    1.51 
   2  11  -8    3.23    1.43 
   2  11  -8    4.87    1.28 
   1  11  -7    0.35    1.05 
   1  11  -7    1.08    1.08 
   0  11  -6    0.61    0.96 
  -1  11  -5    0.28    0.96 
  -2  11  -4    4.58    1.13 
  -3  11  -3    3.28    0.97 
  -4  11  -2    3.46    1.03 
  -5  11  -1   13.34    1.38 
  -6  11   0    9.73    1.22 
  -7  11   1    0.32    0.76 
  -8  11   2    3.78    1.05 
  -9  11   3   10.17    1.31 
 -10  11   4    0.11    0.89 
 -11  11   5   -0.74    0.92 
   6  10 -11    0.62    1.36 
   6  10 -11   -2.05    1.48 
   5  10 -10    3.86    1.44 
   5  10 -10    0.18    1.40 
   4  10  -9    0.61    1.17 
   4  10  -9    1.43    1.33 
   3  10  -8   13.56    1.69 
   3  10  -8   12.82    1.78 
   2  10  -7   10.87    1.44 
   2  10  -7    9.24    1.50 
   1  10  -6    4.80    1.16 
   1  10  -6    3.11    1.16 
   0  10  -5    2.09    0.95 
   0  10  -5    0.43    0.97 
  -1  10  -4    9.38    1.33 
  -1  10  -4   12.86    1.15 
  -2  10  -3    0.58    0.95 
  -3  10  -2    3.03    1.00 
  -4  10  -1    1.71    0.88 
  -5  10   0   10.66    1.26 
  -6  10   1   13.03    1.30 
  -7  10   2    1.00    0.85 
  -8  10   3    4.22    0.95 
  -9  10   4    2.42    0.99 
 -10  10   5    0.55    0.85 
 -11  10   6    1.47    0.96 
   7   9 -11    1.56    1.63 
   7   9 -11    1.22    1.47 
   6   9 -10    0.41    1.50 
   6   9 -10    2.57    1.41 
   5   9  -9    2.48    1.31 
   5   9  -9   -1.81    1.27 
   4   9  -8    6.80    1.51 
   4   9  -8    7.03    1.44 
   3   9  -7   21.69    1.80 
   3   9  -7   19.37    1.77 
   2   9  -6    1.61    1.10 
   2   9  -6    3.38    1.21 
   1   9  -5   -0.21    1.05 
   1   9  -5    1.06    1.07 
   0   9  -4    1.91    1.00 
   0   9  -4    1.12    0.96 
  -1   9  -3    1.11    0.94 
  -1   9  -3    1.07    0.75 
  -2   9  -2    1.07    0.78 
  -2   9  -2   -0.04    0.66 
  -3   9  -1   -0.18    0.82 
  -3   9  -1   -0.38    0.49 
  -4   9   0   11.01    1.16 
  -4   9   0   10.42    0.75 
  -5   9   1    1.37    0.77 
  -6   9   2    0.20    0.68 
  -7   9   3    2.53    0.82 
  -8   9   4    4.71    0.99 
  -9   9   5    0.15    0.81 
 -10   9   6   -0.58    0.82 
 -11   9   7    1.05    1.00 
   8   8 -11    2.46    1.58 
   7   8 -10   -0.62    1.23 
   7   8 -10    0.60    1.49 
   6   8  -9    1.43    1.30 
   6   8  -9   -0.78    1.32 
   5   8  -8    1.57    1.30 
   5   8  -8    0.64    1.18 
   4   8  -7    6.33    1.38 
   4   8  -7    4.68    1.31 
   3   8  -6    4.02    1.23 
   3   8  -6    2.63    1.21 
   2   8  -5   -0.01    1.04 
   2   8  -5    1.08    1.13 
   1   8  -4   -0.97    0.90 
   1   8  -4    2.05    0.95 
   0   8  -3   -0.17    0.83 
   0   8  -3    0.49    0.86 
  -1   8  -2   24.56    1.34 
  -1   8  -2   24.38    1.48 
  -2   8  -1    4.57    0.92 
  -2   8  -1    5.56    0.72 
  -3   8   0    6.87    0.65 
  -3   8   0    6.95    0.97 
  -4   8   1    1.07    0.44 
  -4   8   1    0.44    0.71 
  -5   8   2    4.13    0.54 
  -5   8   2    3.43    0.81 
  -6   8   3    1.48    0.52 
  -6   8   3    1.19    0.76 
  -7   8   4    0.80    0.53 
  -7   8   4    1.12    0.76 
  -8   8   5    0.13    0.55 
  -8   8   5    0.19    0.70 
  -9   8   6    0.01    0.77 
 -10   8   7    6.23    1.17 
 -11   8   8    0.79    0.92 
   8   7 -10    1.83    1.44 
   8   7 -10   -1.91    1.27 
   7   7  -9    1.36    1.29 
   7   7  -9    0.26    1.29 
   6   7  -8    1.58    1.26 
   6   7  -8    2.15    1.33 
   5   7  -7    1.07    1.11 
   5   7  -7    2.07    1.23 
   4   7  -6    1.58    1.18 
   4   7  -6    1.99    1.21 
   3   7  -5   -0.32    1.02 
   3   7  -5    1.16    1.08 
   2   7  -4    1.64    0.99 
   2   7  -4    2.35    1.01 
   1   7  -3    1.25    0.86 
   1   7  -3    0.70    0.87 
   0   7  -2    0.01    0.63 
   0   7  -2    0.33    0.75 
  -1   7  -1   15.22    1.15 
  -1   7  -1   12.62    0.93 
  -2   7   0   17.76    1.30 
  -2   7   0   17.21    1.02 
  -3   7   1   -0.22    0.42 
  -3   7   1    0.40    0.58 
  -4   7   2    1.80    0.64 
  -4   7   2    0.40    0.40 
  -5   7   3    1.00    0.64 
  -5   7   3    0.99    0.45 
  -6   7   4    0.58    0.55 
  -6   7   4   -0.80    0.59 
  -7   7   5    0.61    0.70 
  -7   7   5    0.43    0.54 
  -8   7   6    5.58    0.83 
  -8   7   6    4.43    0.91 
  -9   7   7    1.29    0.78 
  -9   7   7    0.51    0.67 
 -10   7   8    6.31    1.12 
 -10   7   8    5.31    0.99 
 -11   7   9   -0.20    0.78 
 -11   7   9    1.52    0.86 
   9   6 -10    2.61    1.56 
   8   6  -9    1.47    1.39 
   8   6  -9   -0.54    1.31 
   7   6  -8    1.05    1.17 
   7   6  -8   -1.07    1.14 
   6   6  -7    1.19    1.11 
   6   6  -7   -0.09    1.16 
   5   6  -6    0.29    1.18 
   5   6  -6    0.05    1.21 
  -4  -6   5    0.21    0.41 
   4   6  -5    0.77    1.09 
   4   6  -5   -1.27    1.03 
   3   6  -4    0.32    0.95 
   3   6  -4    0.28    0.86 
   2   6  -3    3.52    0.91 
   2   6  -3    1.29    0.88 
   1   6  -2    4.24    0.79 
   1   6  -2    2.45    0.86 
   0   6  -1    5.19    0.83 
   0   6  -1    4.93    0.73 
  -1   6   0    7.48    0.77 
  -1   6   0    8.26    0.76 
  -2   6   1    0.30    0.44 
  -2   6   1    0.88    0.56 
  -3   6   2   55.77    1.70 
  -3   6   2   55.17    1.32 
  -4   6   3   10.85    0.80 
  -4   6   3   10.58    0.93 
  -5   6   4    0.10    0.46 
  -5   6   4   -0.05    0.54 
  -6   6   5    3.96    0.67 
  -6   6   5    3.52    0.82 
  -7   6   6    0.65    0.69 
  -7   6   6    0.25    0.61 
  -8   6   7    1.53    0.80 
  -8   6   7    1.79    0.71 
  -9   6   8    0.46    0.79 
  -9   6   8    0.19    0.69 
 -10   6   9    3.38    0.98 
 -10   6   9    3.07    0.89 
 -11   6  10   -0.18    0.82 
 -11   6  10    0.64    0.87 
  10   5 -10    2.78    1.65 
   9   5  -9   -3.55    1.20 
   8   5  -8    3.18    1.34 
   8   5  -8    4.84    1.54 
   7   5  -7    1.56    1.20 
   7   5  -7    0.38    1.13 
   6   5  -6   -0.19    1.09 
   6   5  -6   -0.62    1.10 
  -5  -5   5    8.87    0.59 
   5   5  -5    7.32    1.43 
   5   5  -5   10.24    1.34 
  -4  -5   4    3.35    0.48 
   4   5  -4    2.83    1.09 
   4   5  -4    4.82    1.09 
   3   5  -3   25.40    1.59 
   3   5  -3   25.58    1.49 
   2   5  -2   -0.42    0.64 
   2   5  -2    0.43    0.70 
   1   5  -1    5.86    0.87 
   1   5  -1    4.73    0.70 
   0   5   0   24.15    1.21 
   0   5   0   25.64    1.13 
  -1   5   1    4.48    0.62 
  -1   5   1    5.20    0.65 
  -2   5   2    6.12    0.67 
  -2   5   2    8.12    0.68 
  -3   5   3    0.77    0.42 
  -3   5   3    1.71    0.56 
  -4   5   4    6.74    0.77 
  -4   5   4    5.81    0.63 
  -5   5   5   -0.07    0.53 
  -5   5   5    0.04    0.50 
  -6   5   6    0.44    0.60 
  -6   5   6    0.29    0.56 
  -7   5   7   13.61    1.28 
  -7   5   7   16.27    1.19 
  -8   5   8    0.77    0.70 
  -8   5   8    1.83    0.74 
  -9   5   9    3.71    0.91 
  -9   5   9    3.81    0.92 
 -10   5  10    7.27    1.13 
 -10   5  10    5.07    1.09 
 -11   5  11    2.44    0.97 
  10   4  -9    0.90    1.49 
   9   4  -8    1.04    1.29 
   8   4  -7   -0.77    1.04 
   8   4  -7    0.04    1.16 
   7   4  -6    8.21    1.48 
   7   4  -6    8.17    1.30 
  -6  -4   5    1.58    0.42 
   6   4  -5   -0.14    1.05 
   6   4  -5    0.62    1.25 
  -5  -4   4    6.66    0.53 
   5   4  -4    5.47    1.29 
   5   4  -4    4.73    1.06 
  -4  -4   3    5.95    0.52 
   4   4  -3    3.31    1.02 
   4   4  -3    5.48    0.91 
   3   4  -2    1.79    0.85 
   3   4  -2    1.35    0.66 
   2   4  -1   21.94    1.33 
   2   4  -1   19.14    1.05 
   1   4   0  105.47    1.83 
   1   4   0  104.04    2.19 
   0   4   1   30.68    1.05 
   0   4   1   31.08    1.24 
  -1   4   2    1.29    0.45 
  -1   4   2    2.28    0.50 
  -2   4   3   13.08    0.81 
  -2   4   3   14.90    0.85 
  -3   4   4    7.37    0.67 
  -3   4   4    6.04    0.68 
  -4   4   5   -0.43    0.46 
  -4   4   5    0.34    0.45 
  -5   4   6    4.25    0.76 
  -5   4   6    4.17    0.67 
  -6   4   7    0.86    0.63 
  -6   4   7    0.17    0.60 
  -7   4   8   -0.18    0.65 
  -7   4   8    0.22    0.66 
  -8   4   9    3.29    0.89 
  -8   4   9    3.46    0.87 
  -9   4  10    4.25    1.01 
  -9   4  10    3.47    0.94 
 -10   4  11    1.04    0.89 
 -11   4  12    1.05    0.97 
  11   3  -9   -0.08    1.54 
  10   3  -8    3.87    1.60 
   9   3  -7    1.00    1.31 
   8   3  -6   -0.29    1.18 
   8   3  -6    1.79    0.98 
  -7  -3   5    0.11    0.41 
   7   3  -5   -0.34    0.93 
   7   3  -5    0.37    1.17 
  -6  -3   4   24.81    0.86 
   6   3  -4   23.04    1.71 
   6   3  -4   22.63    1.86 
  -5  -3   3   73.13    1.30 
   5   3  -3   77.63    2.05 
   5   3  -3   79.34    2.52 
  -4  -3   2    4.14    0.48 
   4   3  -2    5.63    0.76 
   4   3  -2    4.69    0.94 
   3   3  -1   18.27    1.33 
   3   3  -1   16.22    1.06 
   2   3   0   21.89    0.92 
   2   3   0   23.13    1.43 
   1   3   1   22.75    0.83 
   1   3   1   23.10    1.27 
   0   3   2  145.82    2.02 
   0   3   2  145.38    2.27 
  -1   3   3    2.42    0.50 
  -1   3   3    1.66    0.39 
  -2   3   4   10.19    0.74 
  -2   3   4   10.79    0.74 
  -3   3   5   22.75    0.97 
  -3   3   5   22.29    1.10 
  -4   3   6    0.76    0.49 
  -4   3   6    1.15    0.50 
  -5   3   7   19.42    1.17 
  -5   3   7   21.08    1.21 
  -6   3   8   29.74    1.53 
  -6   3   8   27.46    1.46 
  -7   3   9    7.04    1.05 
  -7   3   9    8.38    1.05 
  -8   3  10   -0.11    0.73 
  -9   3  11   14.62    1.48 
 -10   3  12    1.75    0.94 
 -11   3  13    2.14    1.05 
  11   2  -8    0.29    1.37 
  10   2  -7    6.26    1.62 
   9   2  -6    4.24    1.43 
   8   2  -5   28.26    1.62 
   8   2  -5   27.69    2.17 
  -7  -2   4   17.47    0.86 
   7   2  -4   15.21    1.20 
   7   2  -4   17.78    1.76 
  -6  -2   3   53.42    1.24 
   6   2  -3   55.01    2.49 
   6   2  -3   54.68    1.68 
  -5  -2   2   17.00    0.73 
   5   2  -2   16.34    1.35 
   5   2  -2   14.55    1.05 
  -4  -2   1   10.13    0.64 
   4   2  -1    9.06    1.08 
   4   2  -1   10.22    0.72 
  -3  -2   0    4.52    0.47 
   3   2   0    3.57    0.81 
   3   2   0    4.22    0.47 
   2   2   1   16.55    1.16 
   2   2   1   14.44    0.59 
   1   2   2  374.57    4.23 
   1   2   2  371.97    3.55 
   0   2   3    0.75    0.31 
   0   2   3    0.66    0.45 
  -1   2   4   16.33    0.84 
  -1   2   4   13.57    0.70 
  -2   2   5   40.93    1.17 
  -2   2   5   40.17    1.24 
  -3   2   6    9.18    0.75 
  -3   2   6    8.98    0.77 
  -4   2   7   54.75    1.65 
  -4   2   7   52.97    1.57 
  -5   2   8    8.51    0.91 
  -5   2   8    8.93    0.95 
  -6   2   9    0.33    0.62 
  -7   2  10    3.47    0.91 
  -8   2  11    3.64    0.97 
  -9   2  12   16.84    1.58 
 -10   2  13    1.15    0.99 
 -11   2  14    2.02    1.04 
  12   1  -8    4.55    1.77 
  11   1  -7    0.99    1.31 
  10   1  -6   14.92    2.05 
   9   1  -5    9.21    1.67 
  -8  -1   4   16.25    0.95 
   8   1  -4   19.10    1.88 
   8   1  -4   17.97    1.32 
  -7  -1   3   71.79    1.54 
   7   1  -3   69.10    2.63 
   7   1  -3   68.91    1.77 
  -6  -1   2   39.58    1.09 
   6   1  -2   38.82    1.28 
   6   1  -2   38.13    2.08 
  -5  -1   1   19.58    0.77 
   5   1  -1   19.06    1.41 
   5   1  -1   17.28    0.86 
  -4  -1   0   -0.07    0.35 
   4   1   0   -0.05    0.34 
   4   1   0   -1.23    0.69 
  -3  -1  -1   29.18    0.87 
   3   1   1   28.53    0.49 
   2   1   2    2.29    0.21 
   2   1   2    1.39    0.65 
   1   1   3    0.12    0.49 
   1   1   3    0.25    0.25 
   0   1   4   86.16    1.38 
   0   1   4   89.87    1.70 
  -1   1   5   47.05    1.25 
  -1   1   5   47.85    1.18 
  -2   1   6    0.44    0.42 
  -2   1   6    0.25    0.37 
  -3   1   7   24.60    1.12 
  -3   1   7   25.17    1.10 
  -4   1   8   46.27    1.61 
  -5   1   9   26.06    1.39 
  -6   1  10   39.40    1.80 
  -7   1  11    3.42    0.96 
  -8   1  12   32.26    1.94 
  -9   1  13    3.70    1.04 
 -10   1  14    1.63    1.11 
  12   0  -7   -1.60    1.36 
  11   0  -6    6.59    1.58 
  10   0  -5   10.95    1.76 
  -9   0   4    4.57    0.70 
   9   0  -4    7.48    1.53 
  -8   0   3    0.18    0.53 
   8   0  -3    0.32    1.22 
  -7   0   2   15.56    0.92 
   7   0  -2   14.46    1.54 
  -6   0   1   40.84    1.15 
   6   0  -1   41.48    1.98 
  -5   0   0    2.95    0.48 
   5   0   0    4.87    0.95 
  -4   0  -1   16.37    0.70 
   4   0   1   15.84    1.21 
  -3   0  -2   22.10    0.81 
   3   0   2   18.87    1.16 
  -2   0  -3    8.92    0.61 
   2   0   3    8.39    0.74 
   1   0   4   40.99    1.17 
   0   0   5   21.07    0.99 
  -1   0   6    0.58    0.43 
  -2   0   7    2.82    0.55 
  -3   0   8    3.03    0.65 
  -4   0   9   95.34    2.27 
  -5   0  10   13.02    1.16 
  -6   0  11    7.63    1.11 
  -7   0  12   23.77    1.66 
  -8   0  13    0.46    0.89 
  -9   0  14    1.47    1.05 
 -10   0  15    2.13    1.14 
  12  -1  -6    2.96    1.52 
  11  -1  -5    6.74    1.65 
 -10   1   4    1.38    0.61 
  10  -1  -4    0.09    1.08 
  -9   1   3    6.24    0.79 
   9  -1  -3    7.71    1.50 
  -8   1   2   12.14    0.92 
   8  -1  -2   12.44    1.59 
  -7   1   1   16.06    0.93 
   7  -1  -1   15.64    1.50 
  -6   1   0    9.27    0.73 
   6  -1   0    9.31    1.16 
  -5   1  -1   89.78    1.64 
   5  -1   1   89.05    2.27 
  -4   1  -2   59.04    1.28 
  -4   1  -2   58.97    0.71 
   4  -1   2   58.83    1.75 
  -3   1  -3    0.98    0.38 
  -3   1  -3    0.85    0.26 
   3  -1   3    1.44    0.60 
  -2   1  -4   66.11    1.28 
  -2   1  -4   64.33    1.14 
   2  -1   4   64.47    1.46 
  -1   1  -5   45.23    1.06 
   1  -1   5   44.43    1.18 
   0  -1   6   19.39    0.95 
  -1  -1   7   19.69    1.01 
  -2  -1   8    2.49    0.58 
  -3  -1   9   46.81    1.64 
  -4  -1  10   32.83    1.53 
  -5  -1  11    1.36    0.75 
  -6  -1  12    8.20    1.15 
  -7  -1  13   11.57    1.39 
  -8  -1  14   -1.61    0.83 
  -9  -1  15    0.14    0.95 
  13  -2  -6    2.86    1.61 
  12  -2  -5    6.02    1.60 
 -11   2   4    2.95    0.75 
  11  -2  -4    4.01    1.46 
 -10   2   3    0.70    0.59 
  10  -2  -3    2.36    1.23 
  -9   2   2    2.94    0.68 
   9  -2  -2    4.37    1.30 
  -8   2   1   13.82    1.01 
   8  -2  -1   11.29    1.42 
  -7   2   0   27.20    1.16 
  -7   2   0   25.56    0.85 
   7  -2   0   21.29    1.70 
  -6   2  -1   -0.50    0.43 
  -6   2  -1    0.08    0.27 
   6  -2   1   -0.12    0.75 
  -5   2  -2   28.98    0.68 
  -5   2  -2   26.64    1.03 
   5  -2   2   31.48    1.58 
  -4   2  -3   80.63    1.17 
  -4   2  -3   80.04    1.55 
   4  -2   3   82.73    1.83 
  -3   2  -4    1.06    0.42 
  -3   2  -4    0.19    0.36 
   3  -2   4    1.08    0.50 
  -2   2  -5   31.53    1.06 
  -2   2  -5   30.86    0.92 
   2  -2   5   32.71    1.05 
  -1   2  -6    2.47    0.54 
  -1   2  -6    3.03    0.45 
   1  -2   6    3.06    0.50 
   0   2  -7    2.71    0.43 
   0   2  -7    1.38    0.53 
   0  -2   7    2.06    0.52 
   1   2  -8    3.21    0.45 
  -1  -2   8    3.27    0.60 
   2   2  -9   26.66    0.82 
  -2  -2   9   28.43    1.23 
  -3  -2  10   29.35    1.49 
  -4  -2  11    8.74    1.05 
  -5  -2  12    7.49    1.11 
  -6  -2  13    6.75    1.10 
  -7  -2  14   11.92    1.41 
  -8  -2  15    0.41    0.97 
   9   2 -16    1.79    1.19 
  -9  -2  16    1.66    1.07 
  13  -3  -5    5.85    1.75 
 -12   3   4    3.67    0.81 
  12  -3  -4    4.96    1.50 
 -11   3   3   -0.43    0.58 
  11  -3  -3    1.37    1.26 
 -10   3   2   -0.51    0.54 
  10  -3  -2    0.85    1.09 
  -9   3   1    6.67    0.70 
  -9   3   1    4.57    0.76 
   9  -3  -1    6.89    1.32 
  -8   3   0    8.27    0.66 
  -8   3   0   10.94    0.96 
   8  -3   0    8.75    1.26 
  -7   3  -1    3.93    0.47 
  -7   3  -1    3.80    0.67 
   7  -3   1    4.01    1.02 
  -6   3  -2    0.29    0.46 
  -6   3  -2   -0.21    0.30 
   6  -3   2   -0.04    0.72 
  -5   3  -3   18.76    0.75 
  -5   3  -3   19.83    0.95 
   5  -3   3   16.71    1.31 
  -4   3  -4   17.42    0.89 
  -4   3  -4   16.40    0.82 
   4  -3   4   15.13    1.08 
  -3   3  -5   -0.29    0.39 
  -3   3  -5    0.34    0.53 
   3  -3   5    0.36    0.45 
  -2   3  -6   62.29    1.28 
  -2   3  -6   61.05    1.64 
   2  -3   6   60.79    1.36 
  -1   3  -7   13.63    1.00 
  -1   3  -7   14.10    0.75 
   1  -3   7   14.03    0.84 
   0   3  -8    3.80    0.79 
   0   3  -8    4.17    0.49 
   0  -3   8    3.43    0.58 
   1   3  -9   10.81    0.62 
   1   3  -9    8.89    1.04 
  -1  -3   9    9.10    0.81 
   2   3 -10   24.83    1.62 
   2   3 -10   25.53    0.77 
  -2  -3  10   23.98    1.31 
   3   3 -11   12.38    0.62 
   3   3 -11   11.68    1.38 
  -3  -3  11   11.26    1.08 
   4   3 -12   -0.41    0.92 
  -4  -3  12   -0.08    0.71 
   5   3 -13    2.52    1.14 
  -5  -3  13    1.64    0.87 
   6   3 -14    7.09    1.33 
  -6  -3  14    5.55    1.16 
   7   3 -15    6.13    1.38 
  -7  -3  15    6.79    1.28 
   8   3 -16    2.70    1.26 
  -8  -3  16    2.68    1.17 
 -13   4   4    8.26    1.12 
  13  -4  -4    9.67    1.79 
 -12   4   3    6.81    0.97 
  12  -4  -3    6.28    1.48 
 -11   4   2    1.65    0.71 
  11  -4  -2    3.62    1.33 
 -10   4   1    8.24    0.94 
  10  -4  -1    6.69    1.26 
  -9   4   0   10.33    1.01 
  -9   4   0   10.65    0.84 
   9  -4   0    9.61    1.35 
  -8   4  -1    0.18    0.43 
  -8   4  -1    0.19    0.60 
   8  -4   1    1.38    1.05 
  -7   4  -2   -0.08    0.56 
  -7   4  -2    0.07    0.39 
   7  -4   2    0.77    0.90 
  -6   4  -3    7.86    0.77 
  -6   4  -3    7.87    0.63 
   6  -4   3    7.92    1.00 
  -5   4  -4    6.14    0.70 
  -5   4  -4    6.34    0.60 
   5  -4   4    6.58    0.76 
  -4   4  -5    2.50    0.54 
  -4   4  -5    3.83    0.65 
   4  -4   5    2.97    0.53 
  -3   4  -6   16.04    1.20 
  -3   4  -6   15.55    0.80 
   3  -4   6   16.58    0.81 
  -2   4  -7   10.36    0.72 
  -2   4  -7   10.94    1.03 
   2  -4   7   10.79    0.75 
  -1   4  -8   35.19    1.70 
  -1   4  -8   30.08    0.96 
   1  -4   8   30.97    1.08 
   0   4  -9    3.21    0.46 
   0   4  -9    3.79    0.86 
   0  -4   9    4.08    0.65 
   1   4 -10    4.23    0.99 
   1   4 -10    6.91    0.53 
  -1  -4  10    6.78    0.84 
   2   4 -11    5.77    0.46 
   2   4 -11    6.65    1.21 
  -2  -4  11    5.82    0.87 
   3   4 -12   17.03    1.72 
  -3  -4  12   21.87    1.50 
   4   4 -13    6.62    1.32 
  -4  -4  13    5.92    1.05 
   5   4 -14    0.40    1.13 
  -5  -4  14    0.26    0.78 
   6   4 -15    7.24    1.56 
  -6  -4  15    3.75    1.13 
   7   4 -16    0.24    1.28 
  -7  -4  16   -0.62    0.98 
   8   4 -17    1.28    1.49 
  -8  -4  17    3.08    1.22 
 -13   5   3    0.81    0.80 
 -12   5   2    1.06    0.75 
  12  -5  -2    2.42    1.25 
 -11   5   1   -0.30    0.57 
  11  -5  -1    0.89    1.12 
 -10   5   0    5.65    0.88 
  10  -5   0    4.57    1.15 
  -9   5  -1    0.52    0.61 
  -9   5  -1   -0.29    0.44 
   9  -5   1    0.47    1.01 
  -8   5  -2   11.45    0.90 
  -8   5  -2   12.89    1.05 
   8  -5   2   12.47    1.29 
  -7   5  -3    1.99    0.63 
  -7   5  -3    2.66    0.56 
   7  -5   3    3.29    0.96 
  -6   5  -4   10.16    0.89 
  -6   5  -4   11.61    0.83 
   6  -5   4   11.59    0.98 
  -5   5  -5    7.00    0.74 
  -5   5  -5    7.26    0.79 
   5  -5   5    7.57    0.70 
  -4   5  -6    1.92    0.55 
  -4   5  -6    0.60    0.65 
   4  -5   6    1.74    0.43 
  -3   5  -7   27.05    1.05 
  -3   5  -7   23.39    1.52 
   3  -5   7   24.50    0.91 
  -2   5  -8    6.93    0.66 
  -2   5  -8    7.16    1.07 
   2  -5   8    7.92    0.67 
  -1   5  -9   10.17    0.68 
  -1   5  -9   10.46    1.25 
   1  -5   9   10.83    0.82 
   0   5 -10    2.33    0.47 
   0   5 -10    1.69    1.00 
   0  -5  10    2.42    0.63 
   1   5 -11   10.70    0.63 
   1   5 -11    8.21    1.30 
  -1  -5  11    8.48    0.93 
   2   5 -12   -0.15    1.14 
  -2  -5  12   -0.10    0.70 
   3   5 -13    0.71    1.12 
  -3  -5  13   -0.76    0.62 
   4   5 -14    0.34    1.21 
  -4  -5  14    2.44    0.90 
   5   5 -15   -0.59    1.29 
  -5  -5  15    1.21    0.93 
   6   5 -16    1.24    1.29 
  -6  -5  16   -0.10    0.95 
   7   5 -17    2.62    1.59 
  -7  -5  17    0.75    1.07 
 -13   6   2    2.13    0.87 
 -12   6   1   -0.17    0.66 
 -11   6   0    0.55    0.64 
 -10   6  -1    1.60    0.72 
  -9   6  -2    5.90    0.85 
  -9   6  -2    6.39    0.76 
   9  -6   2    6.15    1.06 
  -8   6  -3    9.69    0.98 
  -8   6  -3    9.88    0.86 
   8  -6   3   11.24    1.14 
  -7   6  -4    2.52    0.72 
  -7   6  -4    2.00    0.62 
   7  -6   4    1.48    0.78 
  -6   6  -5    0.91    0.65 
  -6   6  -5    1.98    0.66 
   6  -6   5    1.33    0.59 
  -5   6  -6    5.83    0.77 
  -5   6  -6    3.34    0.77 
   5  -6   6    4.38    0.53 
  -4   6  -7    2.16    0.56 
  -4   6  -7    2.69    0.90 
   4  -6   7    3.72    0.47 
  -3   6  -8    1.77    0.54 
  -3   6  -8    2.18    0.96 
   3  -6   8    1.02    0.44 
  -2   6  -9    8.82    1.22 
  -2   6  -9    7.66    0.73 
   2  -6   9    7.54    0.68 
  -1   6 -10    2.99    1.14 
  -1   6 -10    4.36    0.57 
   1  -6  10    3.34    0.62 
   0   6 -11    0.72    1.11 
   0   6 -11    0.53    0.42 
   0  -6  11    1.09    0.65 
   1   6 -12   31.40    2.32 
  -1  -6  12   27.41    1.45 
   2   6 -13    2.32    1.40 
  -2  -6  13    1.92    0.78 
   3   6 -14    0.95    1.20 
  -3  -6  14    0.04    0.78 
   4   6 -15    1.29    1.36 
  -4  -6  15   -0.49    0.84 
   5   6 -16    0.77    1.30 
  -5  -6  16    0.21    0.90 
   6   6 -17    2.90    1.70 
  -6  -6  17    2.51    1.10 
 -13   7   1    1.78    0.83 
 -12   7   0    2.04    0.82 
 -11   7  -1    0.79    0.74 
 -10   7  -2    7.05    0.98 
  -9   7  -3    1.18    0.70 
  -9   7  -3    0.93    0.58 
  -8   7  -4    0.66    0.68 
  -8   7  -4    1.26    0.63 
  -7   7  -5   17.57    1.19 
  -7   7  -5   17.82    1.29 
  -6   7  -6    0.04    0.67 
  -6   7  -6    0.21    0.62 
  -5   7  -7    3.29    0.72 
  -5   7  -7    1.79    0.85 
  -4   7  -8    0.61    0.58 
  -4   7  -8    2.32    1.00 
   4  -7   8    0.83    0.38 
  -3   7  -9   -0.41    0.53 
  -3   7  -9    0.06    1.05 
   3  -7   9   -0.09    0.42 
  -2   7 -10    2.44    0.58 
  -2   7 -10    1.50    1.13 
   2  -7  10    3.04    0.62 
  -1   7 -11   20.70    1.92 
  -1   7 -11   19.89    0.92 
   1  -7  11   19.25    1.14 
   0   7 -12   -0.11    0.39 
   0   7 -12   -0.92    1.35 
   0  -7  12    0.78    0.64 
   1   7 -13    5.77    1.58 
  -1  -7  13    5.41    0.88 
   2   7 -14   10.56    1.84 
  -2  -7  14   12.56    1.26 
   3   7 -15    3.68    1.62 
  -3  -7  15    1.41    0.87 
   4   7 -16    3.05    1.54 
  -4  -7  16    2.87    1.02 
   5   7 -17    0.48    1.65 
  -5  -7  17   -0.66    0.92 
 -13   8   0    7.30    1.19 
 -12   8  -1    2.42    0.89 
 -11   8  -2   -0.67    0.61 
 -10   8  -3    1.27    0.70 
  -9   8  -4    5.00    0.81 
  -9   8  -4    5.70    0.97 
  -8   8  -5    2.42    0.75 
  -8   8  -5    2.07    0.72 
  -7   8  -6    0.17    0.65 
  -7   8  -6    0.28    0.58 
  -6   8  -7   14.25    1.16 
  -6   8  -7   14.84    1.31 
  -5   8  -8    4.23    0.78 
  -5   8  -8    5.19    1.08 
  -4   8  -9    3.86    1.22 
  -4   8  -9    3.41    0.71 
  -3   8 -10    3.41    1.27 
  -3   8 -10    1.90    0.62 
  -2   8 -11    8.93    1.51 
  -2   8 -11    9.40    0.80 
   2  -8  11    9.59    0.82 
  -1   8 -12    0.46    0.42 
  -1   8 -12    0.19    1.17 
   1  -8  12    0.63    0.60 
   0   8 -13   10.72    1.76 
   0  -8  13   10.04    1.04 
   1   8 -14    1.96    1.52 
  -1  -8  14    1.98    0.82 
   2   8 -15    2.28    1.65 
  -2  -8  15    0.96    0.84 
   3   8 -16   -0.74    1.41 
  -3  -8  16    0.19    0.83 
   4   8 -17    5.71    2.00 
  -4  -8  17    6.56    1.20 
 -12   9  -2    2.22    0.88 
 -11   9  -3   -0.70    0.66 
 -10   9  -4    4.50    0.98 
 -10   9  -4    4.72    0.89 
  -9   9  -5    0.58    0.68 
  -9   9  -5    0.03    0.69 
  -8   9  -6    3.47    0.88 
  -8   9  -6    3.03    0.84 
  -7   9  -7   -0.84    0.68 
  -7   9  -7    0.39    0.61 
  -6   9  -8    1.37    0.66 
  -6   9  -8   -0.36    0.83 
  -5   9  -9    1.05    0.86 
  -5   9  -9    0.66    0.59 
  -4   9 -10    1.82    0.60 
  -4   9 -10    2.17    1.14 
  -3   9 -11    5.61    1.40 
  -3   9 -11    5.76    0.74 
  -2   9 -12    2.56    1.40 
  -2   9 -12    4.43    0.63 
  -1   9 -13    0.89    1.41 
   0   9 -14    3.89    1.67 
   0  -9  14    4.91    0.90 
   1   9 -15   10.24    2.03 
  -1  -9  15   10.13    1.16 
   2   9 -16    0.31    1.51 
  -2  -9  16    0.32    0.80 
   3   9 -17    4.09    2.02 
  -3  -9  17    5.56    1.16 
 -12  10  -3    0.25    0.89 
 -11  10  -4    0.31    0.80 
 -10  10  -5    1.63    0.82 
 -10  10  -5    1.67    0.84 
  -9  10  -6    0.30    0.79 
  -9  10  -6    0.78    0.77 
  -8  10  -7    8.83    1.19 
  -8  10  -7    9.17    1.06 
  -7  10  -8    6.48    0.96 
  -7  10  -8    8.59    1.21 
  -6  10  -9    0.32    0.63 
  -6  10  -9    2.11    1.03 
  -5  10 -10    2.19    0.67 
  -5  10 -10    2.30    1.11 
  -4  10 -11    5.82    0.77 
  -4  10 -11   10.10    1.56 
  -3  10 -12    4.31    0.70 
  -3  10 -12    6.84    1.46 
  -2  10 -13    0.71    1.46 
  -1  10 -14    1.55    1.58 
   0  10 -15    3.01    1.75 
   1  10 -16    0.73    1.73 
   2  10 -17    1.05    1.78 
 -11  11  -5    2.36    0.92 
 -10  11  -6    1.67    0.95 
 -10  11  -6    1.67    0.81 
  -9  11  -7    1.46    0.93 
  -9  11  -7    2.71    0.89 
  -8  11  -8    6.12    0.95 
  -8  11  -8   10.38    1.32 
  -7  11  -9    1.20    0.68 
  -7  11  -9   -0.04    0.94 
  -6  11 -10    0.01    1.03 
  -6  11 -10   -0.08    0.63 
  -5  11 -11    2.15    0.67 
  -5  11 -11    1.83    1.22 
  -4  11 -12    9.01    0.94 
  -4  11 -12    9.45    1.59 
  -3  11 -13    0.41    1.38 
  -2  11 -14    0.43    1.38 
  -1  11 -15    0.61    1.49 
   0  11 -16    0.62    1.86 
   1  11 -17    3.76    2.15 
 -10  12  -7    5.56    1.17 
 -10  12  -7    9.73    1.40 
  -9  12  -8    5.90    1.06 
  -9  12  -8    5.34    1.20 
  -8  12  -9    5.71    0.99 
  -8  12  -9    3.90    1.18 
  -7  12 -10    3.68    0.86 
  -7  12 -10    5.44    1.32 
  -6  12 -11    1.05    1.15 
  -6  12 -11    2.09    0.73 
  -5  12 -12    1.16    1.25 
  -5  12 -12    2.26    0.72 
  -4  12 -13    1.67    1.44 
  -3  12 -14    1.21    1.59 
  -2  12 -15    1.04    1.51 
  -1  12 -16    2.45    1.89 
  -9  13  -9    4.53    1.03 
  -8  13 -10    5.91    1.07 
  -8  13 -10    4.54    1.35 
  -7  13 -11    2.27    0.81 
  -7  13 -11   -0.02    1.19 
  -6  13 -12    1.82    1.35 
  -6  13 -12    6.17    0.94 
  -5  13 -13    5.07    1.55 
  -4  13 -14   -1.09    1.26 
  -2  15  -7   -0.84    1.18 
  -3  15  -6    0.81    1.22 
  -4  15  -5   -1.34    1.00 
  -5  15  -4   -0.31    0.99 
  -6  15  -3   -0.21    0.96 
  -7  15  -2    0.77    1.09 
   0  14  -8    0.60    1.26 
  -1  14  -7   -2.58    1.04 
  -2  14  -6    0.83    1.14 
  -3  14  -5    0.37    1.11 
  -4  14  -4   -0.50    1.02 
  -5  14  -3   -0.89    0.97 
  -6  14  -2    1.44    1.01 
  -7  14  -1    1.46    1.07 
  -8  14   0    2.18    1.16 
   2  13  -9   -1.74    1.22 
   1  13  -8    1.45    1.28 
   0  13  -7    0.31    1.16 
  -1  13  -6   -0.27    1.06 
  -2  13  -5   -0.85    0.98 
  -3  13  -4    3.50    1.10 
  -4  13  -3   -0.08    0.96 
  -5  13  -2    5.05    1.13 
  -6  13  -1    6.34    1.20 
  -7  13   0    0.02    0.91 
  -8  13   1    1.27    0.97 
  -9  13   2   -0.39    0.95 
   4  12 -10    3.01    1.58 
   3  12  -9    0.84    1.36 
   2  12  -8    2.16    1.29 
   1  12  -7   -1.17    1.08 
   0  12  -6    1.36    1.12 
  -1  12  -5   -0.27    0.98 
  -2  12  -4    0.33    0.96 
  -3  12  -3    1.40    0.92 
  -4  12  -2    3.36    1.02 
  -5  12  -1   19.04    1.70 
  -6  12   0    5.43    1.20 
  -7  12   1   -0.43    0.77 
  -8  12   2    2.37    0.98 
  -9  12   3    3.14    1.02 
 -10  12   4    7.42    1.36 
   5  11 -10   -1.58    1.41 
   5  11 -10    2.61    1.49 
   4  11  -9    0.81    1.31 
   4  11  -9   -0.28    1.30 
   3  11  -8   -0.09    1.25 
   3  11  -8    2.05    1.26 
   2  11  -7    5.10    1.31 
   2  11  -7    4.40    1.32 
   1  11  -6   -0.15    1.03 
   1  11  -6    1.33    0.99 
   0  11  -5   -0.41    0.90 
  -1  11  -4    4.87    1.09 
  -2  11  -3   16.11    1.49 
  -3  11  -2    3.87    1.04 
  -4  11  -1    5.27    1.03 
  -5  11   0   29.73    1.77 
  -6  11   1    3.06    0.98 
  -7  11   2    1.16    0.84 
  -8  11   3    1.88    0.95 
  -9  11   4    2.49    1.00 
 -10  11   5    2.03    1.05 
 -11  11   6   -0.45    0.94 
   6  10 -10    6.57    1.69 
   6  10 -10    1.45    1.53 
   5  10  -9    9.07    1.66 
   5  10  -9    6.24    1.60 
   4  10  -8    1.89    1.25 
   4  10  -8   -1.48    1.17 
   3  10  -7   20.66    1.92 
   3  10  -7   22.84    1.97 
   2  10  -6   42.96    2.43 
   2  10  -6   37.55    2.31 
   1  10  -5    0.49    0.96 
   1  10  -5   -0.45    0.99 
   0  10  -4    4.61    1.08 
   0  10  -4    4.62    1.13 
  -1  10  -3   48.22    1.88 
  -1  10  -3   42.85    2.01 
  -2  10  -2    1.97    0.79 
  -2  10  -2    3.77    0.99 
  -3  10  -1    1.88    0.88 
  -4  10   0   15.90    1.39 
  -5  10   1   15.13    1.36 
  -6  10   2    3.51    0.97 
  -7  10   3    1.59    0.80 
  -8  10   4   10.15    1.25 
  -9  10   5   13.52    1.46 
 -10  10   6    1.72    0.91 
 -11  10   7    2.55    1.11 
   7   9 -10    5.31    1.65 
   7   9 -10    0.97    1.63 
   6   9  -9   10.07    1.75 
   6   9  -9   11.50    1.83 
   5   9  -8   20.73    2.03 
   5   9  -8   15.28    1.84 
   4   9  -7   -0.47    1.13 
   4   9  -7   -1.10    1.10 
   3   9  -6   43.12    2.34 
   3   9  -6   42.71    2.51 
   2   9  -5   21.90    1.72 
   2   9  -5   19.85    1.72 
   1   9  -4    1.78    1.04 
   1   9  -4    0.99    0.99 
   0   9  -3    6.07    1.06 
   0   9  -3    4.56    1.08 
  -1   9  -2    6.75    1.02 
  -1   9  -2    6.63    1.03 
  -2   9  -1   33.31    1.44 
  -2   9  -1   34.70    1.85 
  -3   9   0    0.37    0.59 
  -3   9   0   -0.80    0.76 
  -4   9   1   27.80    1.62 
  -4   9   1   25.79    1.12 
  -5   9   2   24.50    1.06 
  -5   9   2   23.87    1.53 
  -6   9   3    0.38    0.74 
  -7   9   4   12.76    1.32 
  -8   9   5    8.38    1.20 
  -9   9   6    6.33    1.18 
 -10   9   7    0.88    0.93 
 -11   9   8    2.98    1.08 
   8   8 -10   -0.11    1.46 
   7   8  -9   13.48    1.98 
   7   8  -9   11.02    1.77 
   6   8  -8    4.92    1.47 
   6   8  -8    3.14    1.37 
   5   8  -7    0.78    1.21 
   5   8  -7    2.64    1.29 
   4   8  -6    5.81    1.28 
   4   8  -6    6.20    1.37 
   3   8  -5    4.13    1.18 
   3   8  -5    3.22    1.25 
   2   8  -4    2.24    1.09 
   2   8  -4    2.64    1.21 
   1   8  -3    3.14    1.11 
   1   8  -3    2.30    0.96 
   0   8  -2   20.09    1.43 
   0   8  -2   18.45    1.45 
  -1   8  -1    6.12    0.92 
  -1   8  -1    4.48    0.86 
  -2   8   0    1.06    0.73 
  -2   8   0    0.61    0.61 
  -3   8   1   36.11    1.27 
  -3   8   1   40.41    1.79 
  -4   8   2   26.06    1.11 
  -4   8   2   25.89    1.57 
  -5   8   3   19.56    1.03 
  -5   8   3   15.34    1.28 
  -6   8   4    0.25    0.70 
  -6   8   4    0.16    0.54 
  -7   8   5    1.56    0.81 
  -7   8   5    1.82    0.65 
  -8   8   6    5.63    0.82 
  -8   8   6    6.64    1.09 
  -9   8   7    7.49    1.16 
  -9   8   7    6.16    0.94 
 -10   8   8    8.55    1.31 
 -11   8   9    5.58    1.25 
   8   7  -9    7.98    1.64 
   7   7  -8   11.53    1.75 
   7   7  -8   10.99    1.64 
   6   7  -7    0.87    1.22 
   6   7  -7    0.20    1.24 
   5   7  -6    1.42    1.18 
   5   7  -6    0.81    1.07 
   4   7  -5    3.93    1.22 
   4   7  -5    4.05    1.28 
   3   7  -4    6.51    1.19 
   3   7  -4    4.44    1.26 
   2   7  -3    0.77    0.86 
   2   7  -3    0.35    1.02 
   1   7  -2   31.84    1.65 
   1   7  -2   38.24    1.88 
   0   7  -1   19.70    1.50 
   0   7  -1   21.80    1.41 
  -1   7   0    2.54    0.68 
  -1   7   0    1.46    0.68 
  -2   7   1   10.21    0.85 
  -2   7   1    9.07    0.91 
  -3   7   2   18.36    1.07 
  -3   7   2   19.99    1.22 
  -4   7   3    0.96    0.68 
  -4   7   3    0.77    0.53 
  -5   7   4    8.96    1.04 
  -5   7   4    8.53    0.79 
  -6   7   5    0.61    0.68 
  -6   7   5    1.96    0.63 
  -7   7   6    8.47    1.08 
  -7   7   6    7.73    0.88 
  -8   7   7    2.12    0.85 
  -8   7   7    1.05    0.65 
  -9   7   8    0.41    0.72 
  -9   7   8    0.65    0.80 
 -10   7   9    8.39    1.16 
 -10   7   9    7.52    1.18 
 -11   7  10    2.01    0.97 
 -11   7  10    0.30    0.94 
   9   6  -9    3.10    1.63 
   8   6  -8    5.57    1.48 
   7   6  -7   -0.01    1.16 
   7   6  -7    2.28    1.20 
   6   6  -6   -0.85    1.16 
   6   6  -6    0.63    1.11 
   5   6  -5    0.36    1.25 
   5   6  -5    2.25    1.21 
  -4  -6   4    5.70    0.62 
   4   6  -4    6.28    1.29 
   4   6  -4    7.75    1.25 
   3   6  -3    2.17    0.92 
   3   6  -3    2.24    1.11 
   2   6  -2    4.30    1.06 
   2   6  -2    4.33    0.86 
   1   6  -1   45.79    1.51 
   1   6  -1   44.23    1.84 
   0   6   0   59.76    1.70 
   0   6   0   59.02    1.76 
  -1   6   1    1.97    0.57 
  -1   6   1    1.80    0.63 
  -2   6   2   21.74    1.23 
  -2   6   2   22.81    1.13 
  -3   6   3    0.78    0.53 
  -3   6   3    1.45    0.53 
  -4   6   4    2.56    0.56 
  -4   6   4    2.33    0.68 
  -5   6   5   11.84    1.07 
  -5   6   5   10.67    0.89 
  -6   6   6   11.35    1.18 
  -6   6   6   13.42    1.03 
  -7   6   7    0.35    0.60 
  -7   6   7    0.03    0.68 
  -8   6   8   18.20    1.32 
  -8   6   8   17.16    1.48 
  -9   6   9    9.63    1.14 
  -9   6   9    7.87    1.19 
 -10   6  10    6.78    1.11 
 -10   6  10    5.36    1.07 
 -11   6  11    1.60    1.06 
 -11   6  11    2.27    0.97 
  10   5  -9    1.18    1.43 
   9   5  -8    8.74    1.72 
   8   5  -7    0.08    1.31 
   7   5  -6    0.74    1.06 
   7   5  -6    0.41    1.15 
   6   5  -5    7.89    1.30 
   6   5  -5    6.63    1.40 
  -5  -5   4    3.16    0.51 
   5   5  -4    1.47    1.05 
   5   5  -4    1.83    1.24 
  -4  -5   3    2.49    0.53 
   4   5  -3    1.07    1.10 
   4   5  -3    3.34    0.96 
   3   5  -2    5.72    1.07 
   3   5  -2    4.56    0.83 
   2   5  -1   12.79    0.93 
   2   5  -1   13.55    1.25 
   1   5   0   33.12    1.25 
   1   5   0   30.91    1.60 
   0   5   1    0.86    0.65 
   0   5   1    2.66    0.58 
  -1   5   2    0.83    0.46 
  -1   5   2    0.83    0.57 
  -2   5   3    0.90    0.51 
  -2   5   3    0.07    0.49 
  -3   5   4    4.45    0.69 
  -3   5   4    4.33    0.63 
  -4   5   5    3.52    0.67 
  -4   5   5    2.01    0.56 
  -5   5   6    7.90    0.82 
  -5   5   6    5.37    0.81 
  -6   5   7   22.93    1.40 
  -6   5   7   23.84    1.31 
  -7   5   8   14.32    1.27 
  -7   5   8   14.03    1.20 
  -8   5   9   16.52    1.28 
  -8   5   9   16.73    1.46 
  -9   5  10    6.06    1.07 
  -9   5  10    4.45    0.99 
 -10   5  11    4.35    1.04 
 -10   5  11    4.00    1.12 
 -11   5  12    3.13    1.08 
  10   4  -8    8.50    1.85 
   9   4  -7    3.20    1.49 
   8   4  -6    5.68    1.51 
   7   4  -5    1.80    1.01 
   7   4  -5    1.65    1.26 
  -6  -4   4   18.82    0.81 
   6   4  -4   17.98    1.82 
   6   4  -4   20.60    1.45 
  -5  -4   3   11.71    0.73 
   5   4  -3   11.24    1.50 
   5   4  -3   12.02    1.14 
  -4  -4   2    3.69    0.52 
   4   4  -2    2.77    0.97 
   4   4  -2    3.82    0.84 
   3   4  -1    0.85    0.58 
   3   4  -1    1.92    0.91 
   2   4   0    0.89    0.82 
   2   4   0    0.75    0.46 
   1   4   1    0.72    0.62 
   1   4   1    0.42    0.40 
   0   4   2   28.38    1.02 
   0   4   2   31.37    1.29 
  -1   4   3   60.47    1.43 
  -1   4   3   61.83    1.55 
  -2   4   4    8.07    0.70 
  -2   4   4    8.89    0.75 
  -3   4   5    0.29    0.47 
  -3   4   5   -0.67    0.40 
  -4   4   6   19.92    1.03 
  -4   4   6   22.08    1.17 
  -5   4   7   45.79    1.69 
  -5   4   7   45.13    1.60 
  -6   4   8    0.55    0.66 
  -6   4   8    0.49    0.70 
  -7   4   9    2.43    0.81 
  -7   4   9    3.45    0.82 
  -8   4  10   24.88    1.69 
  -8   4  10   25.66    1.54 
  -9   4  11    1.38    0.86 
 -10   4  12    4.69    1.10 
 -11   4  13    2.36    1.08 
  11   3  -8    5.18    1.77 
  10   3  -7    2.14    1.36 
   9   3  -6    7.83    1.70 
   8   3  -5    2.02    1.31 
  -7  -3   4   22.31    0.93 
   7   3  -4   22.37    2.00 
   7   3  -4   21.92    1.49 
  -6  -3   3   23.15    0.91 
   6   3  -3   22.34    1.56 
   6   3  -3   21.71    1.84 
  -5  -3   2    0.31    0.42 
   5   3  -2    1.69    0.73 
   5   3  -2    0.98    0.96 
  -4  -3   1    9.53    0.67 
   4   3  -1   12.00    0.83 
   4   3  -1   11.55    1.26 
   3   3   0    0.01    0.83 
   3   3   0    0.52    0.44 
   2   3   1   -0.35    0.71 
   2   3   1    0.28    0.35 
   1   3   2  120.72    1.74 
   1   3   2  116.25    2.26 
   0   3   3   44.74    1.11 
   0   3   3   43.98    1.40 
  -1   3   4  150.49    2.37 
  -1   3   4  152.22    2.28 
  -2   3   5   44.31    1.29 
  -2   3   5   46.13    1.34 
  -3   3   6    4.00    0.60 
  -3   3   6    5.02    0.65 
  -4   3   7   51.38    1.63 
  -4   3   7   55.30    1.64 
  -5   3   8   22.44    1.38 
  -5   3   8   22.50    1.32 
  -6   3   9    6.25    0.93 
  -6   3   9    8.25    1.04 
  -7   3  10    5.27    0.94 
  -7   3  10    4.24    0.90 
  -8   3  11    3.21    0.87 
  -9   3  12    2.16    0.97 
 -10   3  13    0.27    0.91 
  11   2  -7    4.61    1.69 
  10   2  -6    0.73    1.39 
   9   2  -5    1.14    1.20 
  -8  -2   4    4.96    0.64 
   8   2  -4    4.13    1.42 
  -7  -2   3    2.05    0.53 
   7   2  -3    3.43    0.88 
   7   2  -3    0.66    1.12 
  -6  -2   2    0.13    0.44 
   6   2  -2    0.13    0.99 
   6   2  -2    0.92    0.67 
  -5  -2   1    9.31    0.68 
   5   2  -1    8.84    0.73 
   5   2  -1    9.48    1.21 
  -4  -2   0    5.30    0.56 
   4   2   0    5.09    0.51 
   4   2   0    4.76    1.00 
  -3  -2  -1    2.26    0.46 
   3   2   1    2.47    0.78 
   3   2   1    2.42    0.31 
   2   2   2   -0.01    0.59 
   2   2   2    0.80    0.25 
   1   2   3  171.61    2.02 
   1   2   3  170.50    2.67 
   0   2   4  226.22    3.07 
   0   2   4  231.08    2.72 
  -1   2   5   14.06    0.81 
  -1   2   5   13.09    0.86 
  -2   2   6    0.59    0.41 
  -2   2   6    0.78    0.47 
  -3   2   7    7.57    0.74 
  -3   2   7   11.53    0.93 
  -4   2   8   -0.36    0.54 
  -4   2   8    0.62    0.53 
  -5   2   9    7.60    0.98 
  -5   2   9    8.87    1.02 
  -6   2  10    2.67    0.80 
  -7   2  11   16.97    1.41 
  -8   2  12   -0.48    0.78 
  -9   2  13    0.34    0.90 
 -10   2  14   -0.39    0.92 
  12   1  -7    8.10    1.97 
  11   1  -6   -0.15    1.27 
  10   1  -5   -0.85    1.16 
  -9  -1   4    0.27    0.50 
   9   1  -4   -0.65    1.22 
  -8  -1   3    0.88    0.54 
   8   1  -3    2.54    1.36 
  -7  -1   2   11.91    0.84 
   7   1  -2   13.88    1.55 
   7   1  -2   12.49    0.89 
  -6  -1   1    5.61    0.61 
   6   1  -1    5.58    0.64 
   6   1  -1    5.98    1.19 
  -5  -1   0   18.71    0.83 
   5   1   0   17.32    0.76 
   5   1   0   20.95    1.54 
  -4  -1  -1    1.06    0.43 
   4   1   1    1.81    0.79 
  -3  -1  -2   20.47    0.84 
   3   1   2   19.49    1.28 
   2   1   3   72.31    0.97 
   2   1   3   74.14    1.75 
   1   1   4   36.54    1.22 
   1   1   4   38.47    0.85 
   0   1   5    5.08    0.61 
   0   1   5    5.75    0.49 
  -1   1   6    1.80    0.42 
  -1   1   6    2.09    0.52 
  -2   1   7    5.37    0.67 
  -2   1   7    6.35    0.70 
  -3   1   8    7.53    0.80 
  -4   1   9    4.42    0.78 
  -5   1  10    0.80    0.72 
  -6   1  11    0.24    0.70 
  -7   1  12    0.51    0.80 
  -8   1  13    1.05    0.91 
  -9   1  14    4.25    1.17 
 -10   1  15   -0.39    1.03 
  12   0  -6   -0.06    1.54 
  11   0  -5    2.11    1.50 
 -10   0   4    0.58    0.59 
  10   0  -4    0.98    1.20 
  -9   0   3    6.37    0.77 
   9   0  -3    5.73    1.44 
  -8   0   2    8.30    0.83 
   8   0  -2    8.18    1.45 
  -7   0   1    2.75    0.58 
   7   0  -1    2.23    1.17 
   7   0  -1    3.13    0.55 
  -6   0   0   11.24    0.78 
   6   0   0   10.06    0.64 
   6   0   0    8.26    1.22 
  -5   0  -1   20.99    0.90 
   5   0   1   22.58    1.65 
  -4   0  -2    7.96    0.65 
   4   0   2    6.60    0.97 
  -3   0  -3    2.44    0.46 
   3   0   3    2.03    0.69 
  -2   0  -4   74.51    1.40 
   2   0   4   73.49    1.74 
   1   0   5    0.54    0.47 
   0   0   6    6.64    0.69 
  -1   0   7    9.35    0.81 
  -2   0   8   71.93    1.80 
  -3   0   9   46.87    1.57 
  -4   0  10   11.61    1.13 
  -5   0  11    2.70    0.87 
  -6   0  12    1.35    0.82 
  -7   0  13    6.63    1.11 
  -8   0  14    2.75    1.05 
  -9   0  15    3.73    1.14 
  12  -1  -5    2.93    1.53 
 -11   1   4    3.94    0.78 
  11  -1  -4    4.51    1.56 
 -10   1   3    1.47    0.62 
  10  -1  -3    4.25    1.38 
  -9   1   2    1.26    0.59 
   9  -1  -2    1.78    1.25 
  -8   1   1   10.31    0.89 
   8  -1  -1   10.89    1.46 
  -7   1   0   13.74    0.93 
   7  -1   0   14.79    1.52 
  -6   1  -1   32.39    1.16 
   6  -1   1   34.72    1.89 
  -5   1  -2    4.22    0.57 
   5  -1   2    5.63    0.98 
  -4   1  -3   91.45    1.69 
   4  -1   3   90.96    2.15 
  -3   1  -4   11.55    0.68 
  -3   1  -4   10.60    0.63 
   3  -1   4    9.81    0.86 
  -2   1  -5    1.72    0.41 
  -2   1  -5    1.48    0.43 
   2  -1   5    1.46    0.48 
  -1   1  -6    0.62    0.42 
   1  -1   6    0.05    0.44 
   0  -1   7    9.23    0.75 
  -1  -1   8    7.95    0.78 
  -2  -1   9   27.64    1.23 
  -3  -1  10   19.94    1.23 
  -4  -1  11    4.92    0.88 
  -5  -1  12   14.34    1.29 
  -6  -1  13    0.87    0.78 
  -7  -1  14    3.45    1.08 
  -8  -1  15    4.65    1.14 
  -9  -1  16    2.47    1.14 
  13  -2  -5    1.69    1.53 
  12  -2  -4    7.15    1.66 
 -11   2   3    3.72    0.77 
  11  -2  -3    2.63    1.37 
 -10   2   2    6.71    0.84 
  10  -2  -2    6.58    1.43 
  -9   2   1    1.20    0.64 
   9  -2  -1    0.05    1.11 
  -8   2   0   16.21    1.07 
   8  -2   0   15.95    1.65 
  -7   2  -1   30.11    0.82 
  -7   2  -1   30.47    1.24 
   7  -2   1   31.02    1.94 
  -6   2  -2   42.41    1.34 
  -6   2  -2   39.93    0.79 
   6  -2   2   39.07    1.83 
  -5   2  -3    1.99    0.53 
  -5   2  -3    0.81    0.24 
   5  -2   3    1.21    0.79 
  -4   2  -4   16.20    0.86 
  -4   2  -4   16.25    0.68 
   4  -2   4   15.51    1.18 
  -3   2  -5   -0.29    0.44 
  -3   2  -5   -0.19    0.42 
   3  -2   5    0.83    0.53 
  -2   2  -6    0.96    0.50 
  -2   2  -6    1.46    0.47 
   2  -2   6    1.16    0.51 
  -1   2  -7   67.60    1.66 
  -1   2  -7   62.81    1.34 
   1  -2   7   65.55    1.57 
   0   2  -8    4.63    0.55 
   0  -2   8    4.54    0.66 
   1   2  -9    0.10    0.41 
  -1  -2   9    0.69    0.51 
   2   2 -10    5.37    0.56 
  -2  -2  10    6.11    0.82 
  -3  -2  11   43.04    1.71 
  -4  -2  12    9.89    1.19 
  -5  -2  13    1.49    0.84 
  -6  -2  14    6.86    1.22 
  -7  -2  15    2.95    1.02 
  -8  -2  16    0.10    1.01 
  13  -3  -4    1.70    1.49 
 -12   3   3    8.55    1.05 
  12  -3  -3    8.04    1.64 
 -11   3   2    1.93    0.69 
  11  -3  -2    4.50    1.40 
 -10   3   1    0.09    0.60 
  10  -3  -1   -0.57    1.14 
  -9   3   0    2.91    0.73 
   9  -3   0    2.07    1.24 
  -8   3  -1   23.13    1.19 
  -8   3  -1   24.11    0.90 
   8  -3   1   21.33    1.70 
  -7   3  -2   16.02    1.06 
  -7   3  -2   15.88    0.72 
   7  -3   2   16.08    1.46 
  -6   3  -3    0.57    0.31 
  -6   3  -3    1.46    0.57 
   6  -3   3    0.59    0.82 
  -5   3  -4    7.08    0.52 
  -5   3  -4    7.59    0.76 
   5  -3   4    7.95    0.88 
  -4   3  -5   22.88    1.01 
  -4   3  -5   21.81    0.99 
   4  -3   5   21.45    1.19 
  -3   3  -6   33.47    1.33 
  -3   3  -6   33.27    1.07 
   3  -3   6   32.60    1.14 
  -2   3  -7   -0.28    0.58 
  -2   3  -7    0.62    0.44 
   2  -3   7   -0.11    0.43 
  -1   3  -8  124.00    1.92 
  -1   3  -8  121.84    2.45 
   1  -3   8  118.51    2.14 
   0   3  -9   35.69    1.04 
   0   3  -9   35.68    1.68 
   0  -3   9   34.87    1.32 
   1   3 -10    2.65    0.48 
   1   3 -10    1.60    0.78 
  -1  -3  10    0.64    0.59 
   2   3 -11   18.45    1.50 
   2   3 -11   20.56    0.84 
  -2  -3  11   19.29    1.34 
   3   3 -12   33.09    2.05 
   3   3 -12   36.17    0.95 
  -3  -3  12   33.30    1.74 
   4   3 -13   13.01    1.51 
  -4  -3  13    9.31    1.15 
   5   3 -14    0.82    1.06 
  -5  -3  14   -1.03    0.68 
   6   3 -15    4.07    1.32 
  -6  -3  15    3.90    1.13 
   7   3 -16    5.51    1.48 
  -7  -3  16    4.37    1.22 
   8   3 -17    5.66    1.59 
  -8  -3  17    2.92    1.24 
 -13   4   3    2.62    0.85 
  13  -4  -3    4.02    1.59 
 -12   4   2    9.81    1.13 
  12  -4  -2    9.52    1.66 
 -11   4   1    3.20    0.78 
  11  -4  -1    2.43    1.24 
 -10   4   0   -0.10    0.62 
  10  -4   0    0.78    1.06 
  -9   4  -1    2.27    0.69 
   9  -4   1    2.86    1.14 
  -8   4  -2   20.11    0.88 
  -8   4  -2   20.60    1.25 
   8  -4   2   21.75    1.65 
  -7   4  -3    3.29    0.73 
  -7   4  -3    3.76    0.51 
   7  -4   3    3.89    1.07 
  -6   4  -4    5.43    0.72 
  -6   4  -4    5.94    0.58 
   6  -4   4    6.24    0.92 
  -5   4  -5    6.82    0.74 
  -5   4  -5    6.12    0.63 
   5  -4   5    7.48    0.83 
  -4   4  -6   21.15    0.99 
  -4   4  -6   20.38    1.21 
   4  -4   6   19.81    1.03 
  -3   4  -7    4.08    0.61 
  -3   4  -7    3.44    0.78 
   3  -4   7    4.61    0.60 
  -2   4  -8   47.70    1.83 
  -2   4  -8   49.40    1.29 
   2  -4   8   51.49    1.35 
  -1   4  -9   30.48    1.01 
  -1   4  -9   29.31    1.59 
   1  -4   9   33.42    1.27 
   0   4 -10    0.55    0.43 
   0   4 -10    1.22    0.85 
   0  -4  10    0.63    0.55 
   1   4 -11   19.66    1.55 
   1   4 -11   22.20    0.84 
  -1  -4  11   23.38    1.34 
   2   4 -12    1.59    0.44 
   2   4 -12    3.24    1.16 
  -2  -4  12    1.02    0.77 
   3   4 -13    8.27    1.38 
  -3  -4  13    8.46    1.10 
   4   4 -14    9.01    1.43 
  -4  -4  14    7.36    1.11 
   5   4 -15    6.77    1.48 
  -5  -4  15    6.97    1.19 
   6   4 -16    2.38    1.36 
  -6  -4  16    0.12    0.96 
   7   4 -17   -0.10    1.36 
  -7  -4  17    0.54    1.02 
 -13   5   2    5.49    1.02 
 -12   5   1    6.56    1.01 
  12  -5  -1    6.75    1.43 
 -11   5   0    1.62    0.75 
  11  -5   0    0.40    1.17 
 -10   5  -1    8.00    1.02 
  10  -5   1   10.58    1.42 
  -9   5  -2   44.49    1.72 
   9  -5   2   47.20    2.12 
  -8   5  -3   23.45    1.03 
  -8   5  -3   19.08    1.27 
   8  -5   3   22.44    1.76 
  -7   5  -4    8.61    0.91 
  -7   5  -4    8.59    0.72 
   7  -5   4    9.44    1.07 
  -6   5  -5   23.31    1.15 
  -6   5  -5   20.12    1.14 
   6  -5   5   21.69    1.26 
  -5   5  -6    9.05    0.86 
  -5   5  -6    9.10    0.84 
   5  -5   6    9.67    0.81 
  -4   5  -7    6.02    0.93 
  -4   5  -7    7.05    0.74 
   4  -5   7    7.00    0.67 
  -3   5  -8   15.34    1.27 
  -3   5  -8   13.76    0.91 
   3  -5   8   13.47    0.91 
  -2   5  -9   30.47    1.72 
  -2   5  -9   32.72    1.14 
   2  -5   9   31.55    1.18 
  -1   5 -10   27.04    1.04 
  -1   5 -10   25.34    1.99 
   1  -5  10   30.42    1.27 
   0   5 -11   17.10    1.57 
   0   5 -11   19.19    0.85 
   0  -5  11   18.56    1.18 
   1   5 -12   48.88    1.16 
   1   5 -12   50.56    2.41 
  -1  -5  12   50.36    1.84 
   2   5 -13   -0.91    1.16 
  -2  -5  13   -0.77    0.67 
   3   5 -14   -0.03    1.07 
  -3  -5  14    0.34    0.76 
   4   5 -15    2.62    1.29 
  -4  -5  15    1.77    0.87 
   5   5 -16    8.97    1.66 
  -5  -5  16    9.30    1.34 
   6   5 -17    2.34    1.42 
  -6  -5  17    2.81    1.11 
 -13   6   1    6.35    1.07 
 -12   6   0   10.19    1.20 
 -11   6  -1    1.30    0.76 
 -10   6  -2   11.30    1.17 
  -9   6  -3   34.10    1.62 
  -8   6  -4    0.38    0.66 
  -8   6  -4   -0.07    0.48 
   8  -6   4    0.82    0.86 
  -7   6  -5   31.98    1.44 
  -7   6  -5   34.35    1.35 
   7  -6   5   32.34    1.53 
  -6   6  -6    0.82    0.60 
  -6   6  -6   -0.11    0.62 
   6  -6   6    2.19    0.63 
  -5   6  -7    4.81    0.79 
  -5   6  -7    3.78    0.87 
   5  -6   7    4.52    0.61 
  -4   6  -8    0.65    0.86 
  -4   6  -8    1.07    0.55 
   4  -6   8    0.26    0.44 
  -3   6  -9   25.87    1.91 
  -3   6  -9   24.27    1.14 
   3  -6   9   26.61    1.08 
  -2   6 -10   45.53    2.32 
  -2   6 -10   46.05    1.37 
   2  -6  10   46.11    1.40 
  -1   6 -11    0.66    1.20 
  -1   6 -11    0.02    0.47 
   1  -6  11    0.08    0.54 
   0   6 -12   71.75    1.50 
   0   6 -12   73.66    2.91 
   0  -6  12   72.22    2.02 
   1   6 -13    0.90    1.27 
  -1  -6  13    1.13    0.71 
   2   6 -14    8.16    1.62 
  -2  -6  14    9.62    1.12 
   3   6 -15    1.13    1.27 
  -3  -6  15    0.70    0.82 
   4   6 -16    3.54    1.57 
  -4  -6  16    5.40    1.14 
   5   6 -17   12.77    2.08 
  -5  -6  17   14.55    1.60 
   6   6 -18    0.53    1.50 
  -6  -6  18    1.24    1.02 
 -13   7   0    6.72    1.13 
 -12   7  -1    0.65    0.76 
 -11   7  -2    6.16    1.05 
 -10   7  -3    9.12    1.10 
  -9   7  -4    3.78    0.86 
  -9   7  -4    2.26    0.67 
  -8   7  -5   -0.34    0.56 
  -8   7  -5   -0.60    0.62 
  -7   7  -6   18.70    1.28 
  -7   7  -6   20.05    1.24 
  -6   7  -7    6.54    0.95 
  -6   7  -7    6.11    0.88 
  -5   7  -8    4.33    1.01 
  -5   7  -8    4.11    0.75 
  -4   7  -9    4.44    0.72 
  -4   7  -9    3.11    1.11 
   4  -7   9    4.61    0.58 
  -3   7 -10   23.77    1.84 
  -3   7 -10   24.32    1.17 
   3  -7  10   26.63    1.11 
  -2   7 -11   10.17    1.52 
  -2   7 -11   13.31    0.94 
   2  -7  11   13.11    0.99 
  -1   7 -12    7.49    0.73 
  -1   7 -12    6.68    1.56 
   1  -7  12    8.76    0.91 
   0   7 -13    9.72    1.60 
   0  -7  13    9.30    1.00 
   1   7 -14   18.39    1.99 
  -1  -7  14   19.05    1.39 
   2   7 -15    8.85    1.74 
  -2  -7  15    7.50    1.12 
   3   7 -16    2.46    1.59 
  -3  -7  16    1.52    0.90 
   4   7 -17   10.64    2.08 
  -4  -7  17    7.00    1.26 
   5   7 -18    5.19    1.88 
  -5  -7  18    4.64    1.23 
 -13   8  -1   -0.42    0.80 
 -12   8  -2    0.29    0.81 
 -11   8  -3    2.76    0.91 
 -10   8  -4    8.17    1.12 
  -9   8  -5    1.23    0.75 
  -9   8  -5    1.18    0.66 
  -8   8  -6    9.58    1.01 
  -8   8  -6    8.26    1.06 
  -7   8  -7   23.25    1.34 
  -7   8  -7   19.76    1.35 
  -6   8  -8   -1.71    0.71 
  -6   8  -8   -0.74    0.59 
  -5   8  -9   12.81    1.08 
  -5   8  -9   13.89    1.41 
  -4   8 -10    1.91    1.11 
  -4   8 -10    1.39    0.68 
  -3   8 -11   10.15    0.92 
  -3   8 -11   11.07    1.48 
  -2   8 -12    0.90    1.30 
  -2   8 -12    1.59    0.55 
   2  -8  12    0.69    0.55 
  -1   8 -13    1.16    1.22 
   1  -8  13   -0.11    0.57 
   0   8 -14    6.58    1.69 
   0  -8  14    9.58    1.05 
   1   8 -15    5.36    1.81 
  -1  -8  15    7.81    1.06 
   2   8 -16    1.37    1.53 
  -2  -8  16   -0.35    0.77 
   3   8 -17   -1.18    1.49 
  -3  -8  17    1.55    0.93 
   4   8 -18    3.65    2.07 
  -4  -8  18   -0.63    1.02 
 -12   9  -3    0.37    0.84 
 -11   9  -4    0.57    0.78 
 -10   9  -5    0.12    0.74 
  -9   9  -6    1.73    0.81 
  -9   9  -6    0.47    0.67 
  -8   9  -7    0.41    0.77 
  -8   9  -7    0.21    0.69 
  -7   9  -8    2.42    0.78 
  -7   9  -8    1.43    0.87 
  -6   9  -9    0.25    0.85 
  -6   9  -9    0.58    0.60 
  -5   9 -10    5.17    0.82 
  -5   9 -10    4.60    1.17 
  -4   9 -11    0.63    1.13 
  -4   9 -11    1.47    0.64 
  -3   9 -12   11.49    1.63 
  -3   9 -12    9.25    0.88 
  -2   9 -13    0.92    1.39 
  -2   9 -13    0.81    0.50 
  -1   9 -14    1.71    1.53 
   0   9 -15    6.39    1.81 
   1   9 -16    1.08    1.55 
  -1  -9  16    1.02    0.84 
   2   9 -17    3.38    1.89 
  -2  -9  17    4.61    1.04 
   3   9 -18    3.53    2.06 
  -3  -9  18    0.95    0.97 
 -12  10  -4    0.97    0.89 
 -11  10  -5    4.58    1.08 
 -10  10  -6    3.92    0.97 
  -9  10  -7    5.98    1.05 
  -9  10  -7    5.67    1.02 
  -8  10  -8    6.02    1.02 
  -8  10  -8    6.23    1.11 
  -7  10  -9    1.59    0.75 
  -7  10  -9    2.07    1.00 
  -6  10 -10    0.10    0.62 
  -6  10 -10   -2.30    0.86 
  -5  10 -11    0.76    0.60 
  -5  10 -11   -0.61    1.08 
  -4  10 -12    1.26    0.63 
  -4  10 -12    0.86    1.27 
  -3  10 -13    0.79    1.26 
  -3  10 -13    0.36    0.53 
  -2  10 -14    1.50    1.38 
  -1  10 -15   -0.50    1.39 
   0  10 -16   -0.96    1.50 
   1  10 -17    0.66    1.70 
 -11  11  -6    1.54    0.94 
 -10  11  -7    0.77    0.83 
  -9  11  -8    0.39    0.70 
  -9  11  -8   -1.15    0.78 
  -8  11  -9   -0.70    0.89 
  -8  11  -9   -0.11    0.68 
  -7  11 -10   -0.51    0.62 
  -7  11 -10   -0.24    0.95 
  -6  11 -11    0.16    1.08 
  -6  11 -11    2.00    0.71 
  -5  11 -12    0.91    0.64 
  -5  11 -12    1.03    1.11 
  -4  11 -13   -0.07    0.57 
  -4  11 -13   -0.57    1.25 
  -3  11 -14   -0.84    1.25 
  -2  11 -15   -1.68    1.31 
  -1  11 -16   -1.57    1.49 
   0  11 -17   -1.99    1.67 
 -10  12  -8   -0.41    0.83 
  -9  12  -9    1.00    1.01 
  -9  12  -9   -0.25    0.77 
  -8  12 -10   -0.17    0.70 
  -8  12 -10    0.24    1.04 
  -7  12 -11    1.49    1.12 
  -7  12 -11    1.00    0.71 
  -6  12 -12    0.59    0.71 
  -6  12 -12   -0.87    1.15 
  -5  12 -13    0.43    0.62 
  -5  12 -13    0.04    1.27 
  -4  12 -14    2.29    1.42 
  -3  12 -15   -0.25    1.61 
  -2  12 -16    1.00    1.63 
  -7  13 -12   -0.79    1.19 
  -7  13 -12   -0.55    0.70 
  -6  13 -13    0.23    1.21 
  -6  13 -13    0.86    0.75 
  -2  15  -6    0.83    1.24 
  -3  15  -5    2.70    1.35 
  -4  15  -4    0.99    1.21 
  -5  15  -3   -0.43    1.08 
  -6  15  -2    6.54    1.36 
   0  14  -7   -0.16    1.13 
  -1  14  -6    2.56    1.25 
  -2  14  -5    4.76    1.35 
  -3  14  -4    0.91    1.10 
  -4  14  -3    6.89    1.39 
  -5  14  -2    0.94    1.05 
  -6  14  -1   13.80    1.70 
  -7  14   0    8.11    1.44 
  -8  14   1    2.10    1.11 
   2  13  -8   -0.47    1.18 
   1  13  -7    0.77    1.18 
   0  13  -6    1.69    1.09 
  -1  13  -5    0.45    0.95 
  -2  13  -4    5.08    1.22 
  -3  13  -3    2.90    1.16 
  -4  13  -2    1.65    1.00 
  -5  13  -1    1.31    0.98 
  -6  13   0    7.00    1.29 
  -7  13   1   -0.47    0.90 
  -8  13   2    1.29    1.01 
  -9  13   3    1.51    1.09 
   4  12  -9    3.35    1.50 
   4  12  -9    0.19    1.36 
   3  12  -8   -0.44    1.23 
   2  12  -7   -0.71    0.99 
   1  12  -6   12.69    1.62 
   0  12  -5    1.64    1.15 
  -1  12  -4   12.36    1.49 
  -2  12  -3   -0.65    0.94 
  -3  12  -2   -0.39    0.84 
  -4  12  -1    0.52    0.88 
  -5  12   0   -0.20    0.87 
  -6  12   1    4.40    1.05 
  -7  12   2   -0.88    0.86 
  -8  12   3    4.92    1.11 
  -9  12   4    3.32    1.06 
 -10  12   5   -0.43    1.01 
   5  11  -9   -2.31    1.29 
   5  11  -9    3.33    1.54 
   4  11  -8    0.92    1.41 
   4  11  -8   -1.64    1.17 
   3  11  -7   -0.05    1.15 
   3  11  -7    2.17    1.27 
   2  11  -6    8.21    1.42 
   2  11  -6    9.14    1.54 
   1  11  -5    9.90    1.45 
   1  11  -5    8.76    1.37 
   0  11  -4   18.93    1.55 
   0  11  -4   17.03    1.54 
  -1  11  -3    5.01    1.05 
  -2  11  -2    1.25    0.85 
  -3  11  -1    0.63    0.87 
  -4  11   0    2.92    0.99 
  -5  11   1    1.65    0.93 
  -6  11   2    2.38    0.97 
  -7  11   3    6.79    1.21 
  -8  11   4   16.45    1.61 
  -9  11   5    0.07    0.81 
 -10  11   6    1.01    0.96 
   6  10  -9    2.39    1.53 
   6  10  -9   -0.98    1.34 
   5  10  -8    3.47    1.40 
   5  10  -8   -1.13    1.19 
   4  10  -7    5.87    1.40 
   4  10  -7    8.77    1.65 
   3  10  -6   -1.18    1.02 
   3  10  -6    0.17    1.16 
   2  10  -5   -0.01    1.03 
   2  10  -5    0.80    1.00 
   1  10  -4    8.32    1.26 
   1  10  -4    8.12    1.31 
   0  10  -3   -0.27    0.89 
   0  10  -3    1.53    0.94 
  -1  10  -2    0.22    0.81 
  -1  10  -2    0.15    0.86 
  -2  10  -1    0.86    0.76 
  -2  10  -1    2.40    0.94 
  -3  10   0    0.74    0.84 
  -3  10   0   -0.28    0.62 
  -4  10   1    0.17    0.73 
  -5  10   2    0.64    0.72 
  -6  10   3    0.31    0.81 
  -7  10   4    3.90    1.02 
  -8  10   5    0.56    0.86 
  -9  10   6   -0.57    0.84 
 -10  10   7   -0.08    0.95 
   7   9  -9    1.23    1.46 
   6   9  -8    3.56    1.52 
   6   9  -8   -0.90    1.28 
   5   9  -7    4.53    1.48 
   5   9  -7    2.71    1.28 
   4   9  -6    2.48    1.34 
   4   9  -6    3.88    1.24 
   3   9  -5    1.54    1.04 
   3   9  -5   -0.27    1.09 
   2   9  -4    1.26    1.08 
   2   9  -4    1.04    0.91 
   1   9  -3    0.08    0.84 
   1   9  -3   -0.73    1.07 
   0   9  -2    5.75    1.12 
   0   9  -2    3.89    0.96 
  -1   9  -1    0.22    0.82 
  -1   9  -1   -0.10    0.75 
  -2   9   0   11.60    1.05 
  -2   9   0   11.22    1.17 
  -3   9   1    1.30    0.79 
  -3   9   1    2.27    0.66 
  -4   9   2    8.67    0.82 
  -4   9   2    8.02    1.13 
  -5   9   3   19.10    1.44 
  -5   9   3   19.30    1.09 
  -6   9   4    2.91    0.65 
  -6   9   4    2.27    0.87 
  -7   9   5    0.70    0.74 
  -8   9   6    1.42    0.84 
  -9   9   7   -0.36    0.82 
 -10   9   8   -0.44    0.86 
 -11   9   9    0.38    0.95 
   8   8  -9    2.99    1.59 
   7   8  -8    1.57    1.41 
   6   8  -7    5.71    1.56 
   6   8  -7    3.69    1.38 
   5   8  -6   -1.00    1.10 
   5   8  -6    1.36    1.28 
   4   8  -5    1.65    1.24 
   4   8  -5   -1.08    0.92 
   3   8  -4    3.49    1.07 
   3   8  -4    5.55    1.39 
   2   8  -3    0.80    1.17 
   2   8  -3   -0.08    0.88 
   1   8  -2    1.61    0.88 
   1   8  -2    2.31    1.09 
   0   8  -1    5.04    1.05 
   0   8  -1    4.48    0.92 
  -1   8   0   20.22    1.36 
  -1   8   0   17.70    1.23 
  -2   8   1   -0.23    0.66 
  -2   8   1    0.46    0.72 
  -3   8   2    1.33    0.62 
  -3   8   2    0.64    0.75 
  -4   8   3    9.79    0.87 
  -4   8   3    9.85    1.12 
  -5   8   4   19.43    1.13 
  -5   8   4   18.95    1.39 
  -6   8   5   -0.50    0.71 
  -6   8   5   -0.29    0.52 
  -7   8   6    1.84    0.66 
  -7   8   6    0.64    0.79 
  -8   8   7    0.17    0.80 
  -8   8   7    1.55    0.68 
  -9   8   8    3.77    0.87 
  -9   8   8    2.60    0.93 
 -10   8   9   -0.52    0.83 
 -11   8  10    0.89    0.97 
   9   7  -9    2.70    1.66 
   8   7  -8    1.47    1.44 
   7   7  -7    2.03    1.30 
   6   7  -6   12.21    1.69 
   6   7  -6    9.15    1.44 
   5   7  -5    1.88    1.22 
   5   7  -5    0.23    0.97 
   4   7  -4    4.64    1.12 
   4   7  -4    2.39    1.31 
   3   7  -3    1.53    1.28 
   3   7  -3    3.05    1.00 
   2   7  -2    0.31    0.77 
   2   7  -2    0.34    1.02 
   1   7  -1    3.89    1.07 
   1   7  -1    3.31    0.85 
   0   7   0    4.71    0.96 
   0   7   0    4.34    0.82 
  -1   7   1    6.22    0.89 
  -1   7   1    6.77    0.88 
  -2   7   2   -0.24    0.60 
  -2   7   2   -0.21    0.58 
  -3   7   3    3.26    0.67 
  -3   7   3    2.15    0.68 
  -4   7   4   14.87    1.07 
  -4   7   4   15.85    1.22 
  -5   7   5    1.15    0.62 
  -5   7   5    2.52    0.80 
  -6   7   6    1.59    0.77 
  -6   7   6    0.59    0.65 
  -7   7   7    3.27    0.73 
  -7   7   7    2.93    0.90 
  -8   7   8    1.10    0.68 
  -8   7   8    1.07    0.78 
  -9   7   9    2.77    0.99 
  -9   7   9    3.11    0.85 
 -10   7  10    1.42    0.89 
 -10   7  10    2.79    0.96 
 -11   7  11    2.52    1.00 
 -11   7  11    3.00    1.14 
   9   6  -8    2.04    1.53 
   8   6  -7    3.16    1.51 
   7   6  -6    2.90    1.25 
   7   6  -6    5.46    1.56 
   6   6  -5    1.83    1.21 
   6   6  -5    0.21    1.03 
  -5  -6   4    9.21    0.72 
   5   6  -4    9.96    1.28 
   5   6  -4   11.57    1.59 
   4   6  -3    1.37    0.96 
   4   6  -3   -0.09    1.17 
   3   6  -2   29.43    1.63 
   3   6  -2   26.67    1.89 
   2   6  -1    2.61    1.03 
   2   6  -1    1.86    0.74 
   1   6   0   23.62    1.63 
   1   6   0   26.48    1.27 
   0   6   1   23.35    1.40 
   0   6   1   20.96    1.20 
  -1   6   2   16.95    1.19 
  -1   6   2   17.05    1.13 
  -2   6   3   20.17    1.21 
  -2   6   3   21.66    1.22 
  -3   6   4   35.05    1.33 
  -3   6   4   36.89    1.53 
  -4   6   5   20.80    1.15 
  -4   6   5   22.18    1.27 
  -5   6   6    0.25    0.58 
  -5   6   6    1.28    0.68 
  -6   6   7    7.12    1.04 
  -6   6   7    6.73    0.91 
  -7   6   8   14.03    1.31 
  -7   6   8   14.09    1.16 
  -8   6   9    0.33    0.78 
  -8   6   9   -0.56    0.61 
  -9   6  10    8.65    1.15 
  -9   6  10    5.32    1.08 
 -10   6  11    1.53    0.88 
 -10   6  11    4.27    1.09 
 -11   6  12    2.42    1.00 
  10   5  -8    5.43    1.72 
   9   5  -7    1.98    1.48 
   8   5  -6   10.71    1.83 
   7   5  -5   11.17    1.33 
   7   5  -5   14.10    1.75 
  -6  -5   4    5.36    0.61 
   6   5  -4    4.54    1.34 
   6   5  -4    6.55    1.15 
  -5  -5   3    0.31    0.51 
   5   5  -3    0.73    0.94 
   5   5  -3   -0.19    1.05 
   4   5  -2    5.00    0.92 
   4   5  -2    4.33    1.19 
   3   5  -1   21.14    1.64 
   3   5  -1   19.37    1.24 
   2   5   0   48.13    1.46 
   2   5   0   50.67    1.95 
   1   5   1   43.63    1.76 
   1   5   1   43.31    1.38 
   0   5   2    4.35    0.79 
   0   5   2    3.24    0.59 
  -1   5   3    0.52    0.58 
  -1   5   3    1.55    0.53 
  -2   5   4   29.01    1.23 
  -2   5   4   27.06    1.22 
  -3   5   5   29.00    1.28 
  -3   5   5   29.46    1.26 
  -4   5   6   12.50    0.98 
  -4   5   6   11.24    1.04 
  -5   5   7   -0.02    0.56 
  -5   5   7    0.02    0.60 
  -6   5   8   17.60    1.40 
  -6   5   8   16.29    1.25 
  -7   5   9    2.74    0.83 
  -7   5   9    4.23    0.87 
  -8   5  10    3.03    0.86 
  -8   5  10    3.52    0.91 
  -9   5  11   13.49    1.47 
  -9   5  11   11.24    1.29 
 -10   5  12    5.53    1.12 
 -11   5  13    2.17    1.06 
  10   4  -7    1.08    1.42 
   9   4  -6    2.16    1.45 
   8   4  -5   20.75    2.14 
   7   4  -4    1.11    1.25 
   7   4  -4    1.61    0.97 
  -6  -4   3   22.22    0.93 
   6   4  -3   23.01    1.70 
   6   4  -3   23.69    1.98 
  -5  -4   2   29.30    1.07 
   5   4  -2   26.99    2.00 
   5   4  -2   29.00    1.53 
  -4  -4   1   -0.15    0.45 
   4   4  -1   -0.05    0.58 
   4   4  -1   -0.05    0.96 
   3   4   0   17.13    1.42 
   3   4   0   18.09    0.95 
   2   4   1    3.28    0.51 
   2   4   1    2.38    0.83 
   1   4   2  179.79    3.05 
   1   4   2  177.36    2.46 
   0   4   3   -0.68    0.58 
   0   4   3   -0.17    0.38 
  -1   4   4   29.82    1.31 
  -1   4   4   29.56    1.07 
  -2   4   5   41.20    1.35 
  -2   4   5   40.27    1.31 
  -3   4   6   54.83    1.62 
  -3   4   6   53.30    1.68 
  -4   4   7   -0.01    0.51 
  -4   4   7    0.35    0.59 
  -5   4   8   17.32    1.25 
  -5   4   8   18.41    1.37 
  -6   4   9    2.42    0.79 
  -6   4   9    3.09    0.83 
  -7   4  10   -0.32    0.59 
  -7   4  10   -0.11    0.70 
  -8   4  11    0.81    0.84 
  -8   4  11    0.65    0.76 
  -9   4  12   20.35    1.68 
 -10   4  13    2.90    1.07 
  11   3  -7    2.34    1.64 
  10   3  -6   -0.18    1.25 
   9   3  -5   15.01    1.95 
   8   3  -4   19.79    1.97 
  -7  -3   3   26.12    1.02 
   7   3  -3   25.69    1.65 
   7   3  -3   25.11    2.15 
  -6  -3   2   21.78    0.95 
   6   3  -2   21.64    1.37 
   6   3  -2   19.73    1.77 
  -5  -3   1   24.48    0.96 
   5   3  -1   22.94    1.74 
   5   3  -1   26.31    1.22 
  -4  -3   0    2.63    0.53 
   4   3   0    2.03    0.49 
   4   3   0    1.25    0.93 
   3   3   1   97.86    1.51 
   2   3   2  161.30    2.05 
   1   3   3  143.17    2.54 
   1   3   3  141.22    1.98 
   0   3   4   13.13    0.74 
   0   3   4   12.80    0.98 
  -1   3   5   30.64    1.22 
  -1   3   5   30.16    1.05 
  -2   3   6   26.58    1.10 
  -2   3   6   25.48    1.16 
  -3   3   7    4.16    0.72 
  -3   3   7    5.02    0.69 
  -4   3   8    6.68    0.84 
  -4   3   8    8.30    0.91 
  -5   3   9    5.79    0.88 
  -5   3   9    4.22    0.79 
  -6   3  10    3.77    0.92 
  -6   3  10    6.72    1.06 
  -7   3  11    0.26    0.74 
  -8   3  12   18.56    1.56 
  -9   3  13   11.59    1.36 
 -10   3  14    5.95    1.28 
  11   2  -6    6.05    1.70 
  10   2  -5    4.66    1.64 
   9   2  -4   36.26    2.41 
  -8  -2   3    1.10    0.56 
   8   2  -3    1.26    1.13 
  -7  -2   2   30.02    1.13 
   7   2  -2   28.32    2.12 
  -6  -2   1   51.18    1.33 
   6   2  -1   46.40    2.50 
   6   2  -1   49.72    1.43 
  -5  -2   0    2.82    0.56 
   5   2   0    4.70    0.53 
   5   2   0    4.44    1.07 
  -4  -2  -1   31.86    1.05 
   4   2   1   30.26    0.68 
   4   2   1   27.12    1.65 
   3   2   2   11.95    1.13 
   3   2   2   14.71    0.49 
   2   2   3   25.27    0.67 
   2   2   3   28.71    1.48 
   1   2   4    0.67    0.31 
   1   2   4    0.71    0.60 
   0   2   5    2.66    0.43 
   0   2   5    2.53    0.58 
  -1   2   6   30.10    1.21 
  -1   2   6   35.42    1.14 
  -2   2   7    0.62    0.43 
  -2   2   7    1.04    0.54 
  -3   2   8   -0.39    0.47 
  -3   2   8   -0.30    0.46 
  -4   2   9   14.85    1.17 
  -4   2   9   16.97    1.19 
  -5   2  10   42.76    1.73 
  -6   2  11   -0.20    0.74 
  -7   2  12   38.06    1.86 
  -8   2  13   32.92    1.95 
  -9   2  14    7.96    1.27 
 -10   2  15    0.44    1.03 
  12   1  -6    1.85    1.50 
  11   1  -5   -0.19    1.29 
  10   1  -4    3.47    1.42 
  -9  -1   3   48.97    1.51 
  -8  -1   2    9.11    0.83 
   8   1  -2    7.20    1.58 
  -7  -1   1   47.74    1.38 
   7   1  -1   46.01    2.34 
  -6  -1   0   41.02    1.23 
   6   1   0   40.32    2.28 
  -5  -1  -1    0.80    0.47 
   5   1   1    0.49    0.85 
  -4  -1  -2    4.15    0.58 
   4   1   2    4.52    0.95 
  -3  -1  -3  100.64    1.76 
   3   1   3  102.89    2.31 
   2   1   4   47.51    0.86 
   2   1   4   46.19    1.61 
   1   1   5   12.41    0.64 
   1   1   5   10.55    0.84 
   0   1   6   -0.05    0.35 
   0   1   6    0.38    0.48 
  -1   1   7    5.46    0.64 
  -1   1   7    5.76    0.72 
  -2   1   8    0.53    0.53 
  -3   1   9   26.30    1.40 
  -4   1  10   19.75    1.40 
  -5   1  11   13.84    1.28 
  -6   1  12    1.81    0.85 
  -7   1  13    5.30    1.02 
  -8   1  14   13.19    1.49 
  -9   1  15    6.36    1.33 
  12   0  -5    2.13    1.63 
  11   0  -4    7.27    1.73 
 -10   0   3    0.74    0.61 
  10   0  -3    1.83    1.39 
  -9   0   2    3.30    0.69 
   9   0  -2    5.31    1.41 
  -8   0   1    2.55    0.63 
   8   0  -1   -0.17    1.29 
  -7   0   0    5.17    0.71 
   7   0   0    5.03    1.31 
  -6   0  -1    1.02    0.52 
   6   0   1    0.83    1.06 
  -5   0  -2   11.94    0.76 
   5   0   2   10.83    1.19 
  -4   0  -3    1.81    0.52 
   4   0   3    0.00    0.80 
  -3   0  -4    3.17    0.30 
  -3   0  -4    2.65    0.52 
   3   0   4    3.98    0.80 
  -2   0  -5    5.38    0.58 
   2   0   5    2.82    0.63 
   1   0   6   22.56    1.18 
   0   0   7   31.41    1.29 
  -1   0   8    1.76    0.61 
  -2   0   9    0.84    0.57 
  -3   0  10    8.02    0.91 
  -4   0  11   17.25    1.32 
  -5   0  12    5.78    1.06 
  -6   0  13    6.02    1.03 
  -7   0  14    9.30    1.25 
  -8   0  15    0.91    0.91 
  -9   0  16    1.10    1.09 
  12  -1  -4    1.17    1.48 
 -11   1   3    6.00    0.86 
  11  -1  -3    6.99    1.63 
 -10   1   2    0.31    0.58 
  10  -1  -2   -0.02    1.11 
  -9   1   1   -0.18    0.54 
   9  -1  -1   -0.24    1.18 
  -8   1   0    4.17    0.73 
   8  -1   0    4.57    1.39 
  -7   1  -1    4.55    0.71 
   7  -1   1    7.38    1.40 
  -6   1  -2    0.36    0.46 
   6  -1   2   -0.12    0.94 
  -5   1  -3    0.85    0.50 
   5  -1   3    0.17    0.88 
  -4   1  -4   36.29    1.15 
   4  -1   4   41.29    1.66 
  -3   1  -5   13.72    0.79 
  -3   1  -5   12.59    0.74 
   3  -1   5   13.66    1.03 
  -2   1  -6   35.32    1.07 
  -2   1  -6   35.13    1.09 
   2  -1   6   34.47    1.34 
  -1   1  -7   10.37    0.74 
   1  -1   7   10.96    0.86 
   0  -1   8    2.56    0.62 
  -1  -1   9    0.40    0.56 
  -2  -1  10    0.89    0.63 
  -3  -1  11    7.89    0.98 
  -4  -1  12    6.25    1.05 
  -5  -1  13    1.51    0.83 
  -6  -1  14    3.18    0.97 
  -7  -1  15    3.94    1.04 
  -8  -1  16    0.34    1.03 
  13  -2  -4    4.44    1.72 
 -12   2   3   -0.49    0.65 
  12  -2  -3   -0.10    1.36 
 -11   2   2    5.26    0.88 
  11  -2  -2    4.34    1.52 
 -10   2   1    0.21    0.61 
  10  -2  -1   -1.68    1.14 
  -9   2   0    0.65    0.60 
   9  -2   0   -0.26    1.14 
  -8   2  -1    3.26    0.73 
   8  -2   1    5.78    1.40 
  -7   2  -2   -0.72    0.54 
   7  -2   2   -0.86    1.01 
  -6   2  -3    0.79    0.53 
  -6   2  -3    0.11    0.19 
   6  -2   3   -0.15    0.93 
  -5   2  -4    9.66    0.47 
  -5   2  -4   10.81    0.84 
   5  -2   4   10.49    1.07 
  -4   2  -5   14.58    0.80 
  -4   2  -5   16.13    0.86 
   4  -2   5   17.36    1.33 
  -3   2  -6    3.70    0.59 
  -3   2  -6    4.32    0.59 
   3  -2   6    3.27    0.67 
  -2   2  -7    0.46    0.47 
  -2   2  -7    0.64    0.54 
   2  -2   7    1.51    0.58 
  -1   2  -8    8.82    0.71 
  -1   2  -8    7.74    0.80 
   1  -2   8    9.80    0.85 
   0   2  -9    4.88    0.62 
   0  -2   9    4.98    0.72 
   1   2 -10    1.79    0.53 
  -1  -2  10    1.21    0.64 
   2   2 -11    2.74    0.57 
  -2  -2  11    2.06    0.70 
   3   2 -12    0.90    0.52 
  -3  -2  12    1.09    0.72 
  -4  -2  13    0.80    0.75 
  -5  -2  14    0.39    0.78 
  -6  -2  15    6.56    1.21 
  -7  -2  16   -0.44    0.84 
   8   2 -17    0.65    1.13 
  -8  -2  17    1.60    1.14 
  13  -3  -3    4.83    1.68 
 -12   3   2    0.71    0.73 
  12  -3  -2    0.16    1.36 
 -11   3   1    0.94    0.68 
  11  -3  -1    1.11    1.28 
 -10   3   0    3.83    0.79 
  10  -3   0    4.64    1.37 
  -9   3  -1    1.15    0.59 
   9  -3   1    1.29    1.15 
  -8   3  -2    0.29    0.64 
   8  -3   2    1.01    1.20 
  -7   3  -3    2.90    0.38 
  -7   3  -3    3.81    0.73 
   7  -3   3    3.37    1.11 
  -6   3  -4    3.97    0.70 
  -6   3  -4    3.00    0.38 
   6  -3   4    2.68    0.92 
  -5   3  -5    0.48    0.40 
  -5   3  -5    0.54    0.48 
   5  -3   5    0.92    0.76 
  -4   3  -6   -0.24    0.52 
  -4   3  -6   -0.31    0.47 
   4  -3   6    0.84    0.59 
  -3   3  -7   19.22    0.98 
  -3   3  -7   18.49    1.25 
   3  -3   7   18.42    1.13 
  -2   3  -8    6.73    0.84 
  -2   3  -8    7.94    0.71 
   2  -3   8    8.11    0.78 
  -1   3  -9    1.69    0.51 
  -1   3  -9    1.11    0.71 
   1  -3   9    2.30    0.62 
   0   3 -10    5.92    0.63 
   0   3 -10    4.79    0.92 
   0  -3  10    6.92    0.82 
   1   3 -11    0.07    0.50 
   1   3 -11    1.24    0.88 
  -1  -3  11    0.50    0.65 
   2   3 -12   13.92    0.84 
   2   3 -12   15.52    1.49 
  -2  -3  12   15.84    1.22 
   3   3 -13   -0.21    1.06 
  -3  -3  13    0.79    0.84 
   4   3 -14    8.62    1.42 
  -4  -3  14   11.37    1.27 
   5   3 -15    0.99    1.13 
  -5  -3  15   -0.28    0.79 
   6   3 -16   -0.50    1.06 
  -6  -3  16   -0.29    0.89 
   7   3 -17    2.61    1.38 
  -7  -3  17    2.21    1.12 
 -13   4   2    0.12    0.76 
  13  -4  -2    1.64    1.45 
 -12   4   1   -0.61    0.65 
  12  -4  -1    1.56    1.31 
 -11   4   0    4.00    0.87 
  11  -4   0    4.95    1.38 
 -10   4  -1    0.41    0.68 
  10  -4   1    0.37    1.15 
  -9   4  -2    2.10    0.68 
   9  -4   2    0.23    1.02 
  -8   4  -3   13.39    1.14 
   8  -4   3   14.66    1.52 
  -7   4  -4   16.76    0.80 
  -7   4  -4   16.80    1.10 
   7  -4   4   18.43    1.44 
  -6   4  -5    3.53    0.53 
  -6   4  -5    3.00    0.71 
   6  -4   5    1.71    0.88 
  -5   4  -6    1.58    0.57 
  -5   4  -6    2.33    0.64 
   5  -4   6    1.44    0.72 
  -4   4  -7    8.43    0.91 
  -4   4  -7    7.65    0.80 
   4  -4   7    7.73    0.80 
  -3   4  -8    1.16    0.79 
  -3   4  -8    1.20    0.54 
   3  -4   8   -0.20    0.52 
  -2   4  -9    0.62    0.51 
  -2   4  -9    0.53    0.83 
   2  -4   9    0.40    0.51 
  -1   4 -10    0.86    0.91 
  -1   4 -10   -0.05    0.50 
   1  -4  10    0.87    0.57 
   0   4 -11   -1.66    0.81 
   0   4 -11    0.96    0.50 
   0  -4  11    0.14    0.58 
   1   4 -12   12.00    1.42 
   1   4 -12   13.00    0.82 
  -1  -4  12   12.77    1.16 
   2   4 -13    2.37    1.26 
  -2  -4  13    1.45    0.75 
   3   4 -14    4.89    1.33 
  -3  -4  14    4.66    0.90 
   4   4 -15    3.09    1.23 
  -4  -4  15    3.10    1.00 
   5   4 -16    3.32    1.39 
  -5  -4  16    2.31    1.02 
   6   4 -17    0.55    1.24 
  -6  -4  17    2.23    1.05 
   7   4 -18   -0.95    1.26 
  -7  -4  18   -0.09    1.07 
 -13   5   1    1.06    0.78 
 -12   5   0    1.65    0.83 
 -11   5  -1    2.33    0.83 
  11  -5   1    5.12    1.34 
 -10   5  -2   -0.26    0.65 
  10  -5   2    1.29    1.14 
  -9   5  -3    8.32    1.01 
   9  -5   3    6.08    1.21 
  -8   5  -4   17.69    1.28 
   8  -5   4   17.13    1.41 
  -7   5  -5    2.50    0.71 
  -7   5  -5    3.69    0.60 
   7  -5   5    4.28    1.03 
  -6   5  -6    7.11    0.75 
  -6   5  -6    5.23    0.82 
   6  -5   6    9.23    0.98 
  -5   5  -7    1.60    0.62 
  -5   5  -7    1.05    0.73 
   5  -5   7    1.65    0.62 
  -4   5  -8    9.79    1.13 
  -4   5  -8   10.95    0.90 
   4  -5   8    9.66    0.85 
  -3   5  -9    2.61    0.96 
  -3   5  -9    2.65    0.64 
   3  -5   9    1.45    0.56 
  -2   5 -10    3.08    0.64 
  -2   5 -10    1.99    1.10 
   2  -5  10    5.22    0.72 
  -1   5 -11    8.13    1.35 
  -1   5 -11    9.42    0.82 
   1  -5  11    8.26    0.87 
   0   5 -12    8.46    1.38 
   0   5 -12   10.00    0.79 
   0  -5  12    7.92    0.97 
   1   5 -13    2.86    1.32 
   1   5 -13    2.13    0.53 
  -1  -5  13    3.39    0.86 
   2   5 -14   12.91    1.64 
  -2  -5  14   11.55    1.21 
   3   5 -15    0.25    1.14 
  -3  -5  15   -0.85    0.74 
   4   5 -16    1.01    1.23 
  -4  -5  16   -0.77    0.72 
   5   5 -17    0.63    1.38 
  -5  -5  17    0.27    0.96 
   6   5 -18    5.58    1.78 
  -6  -5  18    3.89    1.21 
 -13   6   0    1.96    0.89 
 -12   6  -1    1.95    0.85 
 -11   6  -2    0.99    0.76 
 -10   6  -3    1.34    0.77 
  -9   6  -4    2.52    0.82 
  -8   6  -5    5.74    0.93 
  -8   6  -5    4.96    0.69 
   8  -6   5    4.16    0.96 
  -7   6  -6    1.19    0.66 
  -7   6  -6    0.20    0.60 
   7  -6   6   -0.17    0.74 
  -6   6  -7    6.35    0.88 
  -6   6  -7    4.95    0.83 
   6  -6   7    6.28    0.81 
  -5   6  -8    0.88    0.65 
  -5   6  -8    0.10    0.80 
   5  -6   8   -0.08    0.55 
  -4   6  -9    0.01    0.94 
  -4   6  -9    0.09    0.59 
   4  -6   9   -0.06    0.50 
  -3   6 -10   15.33    1.55 
  -3   6 -10   13.05    0.99 
   3  -6  10   15.98    1.02 
  -2   6 -11   31.34    2.26 
  -2   6 -11   29.80    1.21 
   2  -6  11   30.04    1.30 
  -1   6 -12    0.87    1.34 
  -1   6 -12   -0.14    0.51 
   1  -6  12    1.92    0.67 
   0   6 -13    5.88    1.39 
   0   6 -13    2.86    0.56 
   0  -6  13    2.40    0.74 
   1   6 -14    4.80    1.42 
  -1  -6  14    4.70    0.88 
   2   6 -15    1.93    1.41 
  -2  -6  15    0.96    0.80 
   3   6 -16    0.71    1.39 
  -3  -6  16    0.12    0.82 
   4   6 -17    2.49    1.56 
  -4  -6  17    2.18    1.02 
   5   6 -18    0.41    1.62 
  -5  -6  18   -0.27    0.95 
 -13   7  -1    4.91    1.07 
 -12   7  -2    0.24    0.78 
 -11   7  -3    2.22    0.86 
 -10   7  -4   11.78    1.26 
  -9   7  -5    6.13    0.94 
  -8   7  -6   -0.33    0.56 
  -8   7  -6    1.51    0.67 
  -7   7  -7    3.78    0.74 
  -7   7  -7    3.00    0.83 
  -6   7  -8   30.88    1.51 
  -6   7  -8   31.60    1.67 
  -5   7  -9    1.65    0.73 
  -5   7  -9    1.07    0.94 
  -4   7 -10    5.05    0.83 
  -4   7 -10    5.19    1.23 
   4  -7  10    4.82    0.67 
  -3   7 -11    8.73    0.90 
  -3   7 -11   10.91    1.45 
   3  -7  11    9.15    0.84 
  -2   7 -12    3.05    1.32 
  -2   7 -12    2.99    0.67 
   2  -7  12    1.86    0.65 
  -1   7 -13    8.30    1.52 
  -1   7 -13    8.09    0.76 
   1  -7  13    6.86    0.88 
   0   7 -14    0.06    1.37 
   0  -7  14    1.75    0.75 
   1   7 -15    9.78    1.85 
  -1  -7  15    8.08    1.09 
   2   7 -16    1.66    1.46 
  -2  -7  16    1.51    0.87 
  -3  -7  17    4.17    1.05 
   4   7 -18    3.04    1.73 
  -4  -7  18    1.19    1.02 
 -12   8  -3    1.15    0.80 
 -11   8  -4    0.87    0.82 
 -10   8  -5    6.51    1.06 
  -9   8  -6    3.13    0.89 
  -8   8  -7   -0.99    0.65 
  -8   8  -7    0.28    0.68 
  -7   8  -8   14.12    1.22 
  -7   8  -8   15.23    1.25 
  -6   8  -9    9.21    1.19 
  -6   8  -9    9.61    1.06 
  -5   8 -10    0.35    0.64 
  -5   8 -10    1.81    0.99 
  -4   8 -11   10.80    1.01 
  -4   8 -11    8.91    1.43 
  -3   8 -12   18.95    1.84 
  -3   8 -12   16.71    1.05 
  -2   8 -13    6.94    0.78 
  -2   8 -13    5.27    1.49 
   2  -8  13    6.57    0.82 
  -1   8 -14   -0.94    1.19 
   1  -8  14    1.62    0.69 
   0   8 -15    4.78    1.56 
   0  -8  15    5.93    0.95 
   1   8 -16    7.38    1.89 
  -1  -8  16    5.82    1.03 
   2   8 -17   -0.70    1.50 
  -2  -8  17    3.26    1.01 
   3   8 -18    7.85    2.06 
  -3  -8  18    5.69    1.18 
 -12   9  -4    0.12    0.77 
 -11   9  -5   10.22    1.25 
 -10   9  -6   19.34    1.56 
  -9   9  -7    1.07    0.79 
  -8   9  -8   11.44    1.22 
  -8   9  -8   15.78    1.40 
  -7   9  -9    4.64    0.87 
  -7   9  -9    2.46    0.97 
  -6   9 -10    0.69    0.91 
  -6   9 -10   -0.44    0.63 
  -5   9 -11    5.18    0.86 
  -5   9 -11    4.16    1.23 
  -4   9 -12    8.34    1.49 
  -4   9 -12    6.15    0.87 
  -3   9 -13   -0.52    0.55 
  -3   9 -13   -0.09    1.19 
  -2   9 -14    1.87    1.46 
  -1   9 -15    2.95    1.63 
   0   9 -16   15.24    2.11 
   1   9 -17    4.87    1.94 
   2   9 -18   -1.33    1.60 
  -2  -9  18    0.41    0.86 
 -11  10  -6   13.23    1.42 
 -10  10  -7    6.67    1.15 
  -9  10  -8    1.66    0.83 
  -8  10  -9    9.45    1.17 
  -8  10  -9   12.73    1.35 
  -7  10 -10    5.48    1.20 
  -7  10 -10    4.89    0.95 
  -6  10 -11    0.97    0.69 
  -6  10 -11   -0.71    0.98 
  -5  10 -12    7.20    0.94 
  -5  10 -12    8.80    1.53 
  -4  10 -13   11.27    1.04 
  -4  10 -13   12.64    1.80 
  -3  10 -14    6.54    1.72 
  -2  10 -15   -0.35    1.51 
  -1  10 -16   11.45    2.14 
   0  10 -17   -2.70    1.71 
   1  10 -18   -1.42    1.86 
 -11  11  -7    1.48    0.93 
 -10  11  -8   -0.41    0.82 
  -9  11  -9    0.09    0.69 
  -8  11 -10    8.64    1.16 
  -8  11 -10    7.48    1.33 
  -7  11 -11   -2.29    0.98 
  -7  11 -11    0.01    0.70 
  -6  11 -12    3.63    0.85 
  -6  11 -12    3.03    1.24 
  -5  11 -13   16.11    1.27 
  -5  11 -13   12.89    1.72 
  -4  11 -14   16.04    2.02 
  -4  11 -14   16.03    1.20 
  -3  11 -15   -1.65    1.32 
  -2  11 -16    5.85    1.82 
  -1  11 -17    5.31    2.11 
  -9  12 -10    0.75    0.85 
  -8  12 -11    6.36    1.09 
  -8  12 -11    5.41    1.33 
  -7  12 -12    0.79    0.74 
  -7  12 -12    1.15    1.29 
  -6  12 -13    1.11    0.72 
  -6  12 -13   -0.34    1.23 
  -5  12 -14    8.22    1.75 
  -5  12 -14   12.76    1.18 
  -4  12 -15   -0.54    1.48 
  -3  12 -16   -2.86    1.54 
  -2  15  -5   -0.51    1.17 
  -3  15  -4    3.11    1.32 
  -4  15  -3   -0.23    1.12 
  -5  15  -2    4.19    1.32 
  -6  15  -1   -0.10    1.07 
   1  14  -7    8.23    1.63 
   0  14  -6    3.40    1.33 
  -1  14  -5    5.42    1.43 
  -2  14  -4    0.00    1.08 
  -3  14  -3    4.37    1.28 
  -4  14  -2    0.65    0.98 
  -5  14  -1    1.15    1.08 
  -6  14   0    0.62    1.04 
  -7  14   1    2.80    1.10 
  -8  14   2   -0.04    0.99 
   2  13  -7    0.90    1.28 
   1  13  -6    1.74    1.19 
   0  13  -5   15.78    1.73 
  -1  13  -4    2.91    1.06 
  -2  13  -3    3.66    1.13 
  -3  13  -2    2.78    1.14 
  -4  13  -1    0.15    0.95 
  -5  13   0    7.20    1.27 
  -6  13   1   -1.02    0.91 
  -7  13   2    6.37    1.26 
  -8  13   3    2.11    1.02 
  -9  13   4    5.48    1.32 
   4  12  -8    5.55    1.58 
   4  12  -8    6.00    1.74 
   3  12  -7    0.60    1.39 
   3  12  -7    1.02    1.21 
   2  12  -6    9.12    1.42 
   1  12  -5    8.14    1.42 
   0  12  -4    2.45    1.07 
  -1  12  -3    8.39    1.28 
  -2  12  -2    9.54    1.32 
  -3  12  -1    2.45    1.03 
  -4  12   0    5.74    1.12 
  -5  12   1    5.17    1.10 
  -6  12   2   -0.68    0.88 
  -7  12   3   16.46    1.66 
  -8  12   4    1.36    0.98 
  -9  12   5   14.42    1.70 
   5  11  -8    7.07    1.59 
   5  11  -8    8.93    1.88 
   4  11  -7   -2.31    1.06 
   4  11  -7   -1.25    1.36 
   3  11  -6    4.42    1.49 
   3  11  -6    4.13    1.26 
   2  11  -5   -0.87    0.96 
   2  11  -5    0.51    1.16 
   1  11  -4   -0.25    0.95 
   1  11  -4   -0.69    1.06 
   0  11  -3    2.97    1.12 
   0  11  -3    4.33    1.03 
  -1  11  -2    5.83    1.17 
  -2  11  -1    4.28    1.02 
  -3  11   0   -0.45    0.83 
  -4  11   1    5.39    1.06 
  -5  11   2    7.67    1.23 
  -6  11   3   24.02    1.84 
  -7  11   4    0.35    0.77 
  -8  11   5   13.58    1.51 
  -9  11   6    7.46    1.28 
 -10  11   7   -0.35    0.91 
   6  10  -8    5.47    1.67 
   5  10  -7    2.92    1.30 
   5  10  -7    2.21    1.37 
   4  10  -6   17.63    1.96 
   4  10  -6   12.10    1.51 
   3  10  -5   25.33    2.09 
   3  10  -5   29.06    2.01 
   2  10  -4    5.07    1.16 
   2  10  -4    4.85    1.29 
   1  10  -3   -0.21    0.86 
   1  10  -3    0.51    0.98 
   0  10  -2   18.09    1.49 
   0  10  -2   19.45    1.54 
  -1  10  -1   29.28    1.70 
  -1  10  -1   34.03    1.92 
  -2  10   0   15.02    1.41 
  -2  10   0   15.97    1.20 
  -3  10   1    6.82    1.06 
  -3  10   1    8.77    0.92 
  -4  10   2   16.66    1.43 
  -5  10   3    8.53    1.22 
  -6  10   4    0.61    0.81 
  -7  10   5    2.51    0.91 
  -8  10   6    5.48    1.18 
  -9  10   7    5.26    1.20 
 -10  10   8    2.30    1.14 
   7   9  -8    1.95    1.63 
   6   9  -7   -0.30    1.13 
   6   9  -7    0.84    1.41 
   5   9  -6   -1.10    1.10 
   5   9  -6   -1.25    1.13 
   4   9  -5   -0.12    1.04 
   4   9  -5    1.03    1.25 
   3   9  -4    6.04    1.13 
   3   9  -4    6.64    1.44 
   2   9  -3    4.79    1.25 
   2   9  -3    8.07    1.15 
   1   9  -2   -0.76    0.80 
   1   9  -2   -0.46    0.96 
   0   9  -1    6.21    1.18 
   0   9  -1    5.51    1.05 
  -1   9   0   55.58    2.05 
  -1   9   0   60.19    2.12 
  -2   9   1    0.07    0.77 
  -2   9   1    2.20    0.84 
  -3   9   2   10.74    0.99 
  -3   9   2    8.70    1.09 
  -4   9   3   14.19    1.04 
  -4   9   3   12.13    1.23 
  -5   9   4    2.87    0.88 
  -5   9   4    2.29    0.64 
  -6   9   5   -0.10    0.53 
  -6   9   5   -0.17    0.68 
  -7   9   6    3.79    0.76 
  -7   9   6    4.98    1.07 
  -8   9   7   24.59    1.75 
  -9   9   8   -0.10    0.81 
 -10   9   9    5.34    1.29 
   8   8  -8    4.17    1.74 
   7   8  -7    3.74    1.60 
   6   8  -6   -0.88    1.10 
   6   8  -6    1.37    1.38 
   5   8  -5    3.38    1.44 
   5   8  -5    4.63    1.21 
   4   8  -4    9.66    1.56 
   4   8  -4    7.71    1.18 
   3   8  -3   14.04    1.30 
   3   8  -3   12.33    1.59 
   2   8  -2    6.55    1.07 
   2   8  -2    4.73    1.32 
   1   8  -1   -0.57    0.74 
   1   8  -1    1.63    1.08 
   0   8   0    9.19    1.19 
   0   8   0    8.34    1.04 
  -1   8   1    9.64    1.06 
  -1   8   1    9.19    1.06 
  -2   8   2    3.85    0.84 
  -2   8   2    3.76    0.87 
  -3   8   3    5.00    0.88 
  -3   8   3    5.31    0.83 
  -4   8   4   10.07    1.14 
  -4   8   4   10.93    1.00 
  -5   8   5    1.00    0.62 
  -5   8   5    2.14    0.78 
  -6   8   6    4.51    0.97 
  -6   8   6    3.68    0.74 
  -7   8   7    1.65    0.82 
  -7   8   7    3.31    0.78 
  -8   8   8   12.98    1.20 
  -8   8   8   11.28    1.33 
  -9   8   9    2.89    0.85 
  -9   8   9    2.46    0.97 
 -10   8  10    3.85    1.12 
   9   7  -8    1.39    1.64 
   8   7  -7    2.83    1.58 
   7   7  -6    5.25    1.54 
   6   7  -5   -0.89    0.98 
   6   7  -5    2.40    1.43 
   5   7  -4    4.79    1.08 
   5   7  -4    7.43    1.45 
   4   7  -3    0.07    1.24 
   4   7  -3    0.24    0.88 
   3   7  -2    6.85    1.04 
   3   7  -2    4.98    1.39 
   2   7  -1    0.99    0.76 
   2   7  -1    0.39    1.10 
   1   7   0    8.48    1.26 
   1   7   0   11.06    1.04 
   0   7   1   25.02    1.64 
   0   7   1   27.22    1.44 
  -1   7   2    3.18    0.71 
  -1   7   2    4.13    0.86 
  -2   7   3    3.65    0.81 
  -2   7   3    4.78    0.80 
  -3   7   4    2.60    0.73 
  -3   7   4    3.64    0.76 
  -4   7   5   20.79    1.29 
  -4   7   5   21.88    1.48 
  -5   7   6    0.39    0.59 
  -5   7   6    0.11    0.68 
  -6   7   7    3.90    0.80 
  -6   7   7    4.97    0.93 
  -7   7   8    1.57    0.71 
  -7   7   8    1.13    0.81 
  -8   7   9    0.83    0.83 
  -8   7   9    1.68    0.76 
  -9   7  10    0.35    0.75 
  -9   7  10   -0.30    0.82 
 -10   7  11    0.18    0.90 
 -10   7  11    0.38    0.80 
   9   6  -7    3.36    1.50 
   8   6  -6    3.07    1.52 
   7   6  -5   -0.04    1.31 
   6   6  -4    2.09    0.97 
   6   6  -4    1.56    1.34 
  -5  -6   3    1.61    0.59 
   5   6  -3    2.22    1.35 
   5   6  -3    0.06    0.87 
   4   6  -2    3.96    1.43 
   4   6  -2    5.90    0.96 
   3   6  -1    9.50    1.46 
   3   6  -1    9.28    0.98 
   2   6   0    4.70    0.78 
   2   6   0    6.01    1.16 
   1   6   1   -0.18    0.56 
   1   6   1    0.89    0.86 
   0   6   2    0.96    0.58 
   0   6   2    0.58    0.76 
  -1   6   3    0.75    0.52 
  -1   6   3    0.73    0.67 
  -2   6   4    6.11    0.84 
  -2   6   4    6.69    0.83 
  -3   6   5    4.49    0.80 
  -3   6   5    4.37    0.78 
  -4   6   6   10.68    1.09 
  -4   6   6   13.22    1.07 
  -5   6   7   16.17    1.36 
  -5   6   7   16.45    1.22 
  -6   6   8    6.80    0.93 
  -6   6   8    8.63    1.09 
  -7   6   9    2.33    0.89 
  -7   6   9    3.41    0.84 
  -8   6  10    2.97    0.86 
  -8   6  10    3.63    1.00 
  -9   6  11    0.37    0.74 
  -9   6  11    0.75    0.90 
 -10   6  12    0.09    0.96 
 -10   6  12    0.51    0.86 
  10   5  -7   -1.69    1.28 
   9   5  -6    2.65    1.42 
   8   5  -5   -0.73    1.20 
   7   5  -4    8.94    1.67 
  -6  -5   3    0.40    0.49 
   6   5  -3    1.21    0.82 
   6   5  -3    2.60    1.31 
  -5  -5   2    0.63    0.55 
   5   5  -2    0.06    0.82 
   5   5  -2    0.50    1.17 
   4   5  -1    0.31    0.67 
   4   5  -1   -0.10    1.08 
   3   5   0    1.86    0.61 
   3   5   0    0.81    1.11 
   2   5   1    0.57    0.94 
   2   5   1    0.02    0.49 
   1   5   2   -0.12    0.45 
   1   5   2    0.22    0.78 
   0   5   3    1.28    0.50 
   0   5   3    2.69    0.77 
  -1   5   4   11.13    0.86 
  -1   5   4   13.13    1.04 
  -2   5   5    1.33    0.60 
  -2   5   5    0.54    0.51 
  -3   5   6    0.09    0.57 
  -3   5   6    0.05    0.59 
  -4   5   7    6.03    0.89 
  -4   5   7    5.45    0.85 
  -5   5   8    2.77    0.77 
  -5   5   8    2.53    0.77 
  -6   5   9    2.92    0.83 
  -6   5   9    1.58    0.75 
  -7   5  10   25.89    1.53 
  -7   5  10   25.11    1.63 
  -8   5  11    0.28    0.85 
  -8   5  11   -0.43    0.68 
  -9   5  12   -1.07    0.84 
  -9   5  12    0.84    0.81 
 -10   5  13    0.47    0.90 
  10   4  -6    2.62    1.59 
   9   4  -5   -0.03    1.27 
   8   4  -4    5.88    1.61 
  -7  -4   3    6.04    0.67 
   7   4  -3    6.14    1.52 
  -6  -4   2    7.40    0.75 
   6   4  -2    9.13    0.98 
   6   4  -2    5.78    1.43 
  -5  -4   1    4.78    0.67 
   5   4  -1    3.23    1.36 
   5   4  -1    4.28    0.75 
  -4  -4   0    4.46    0.67 
   4   4   0    4.09    0.63 
   4   4   0    2.40    1.12 
   3   4   1    3.90    1.02 
   3   4   1    3.72    0.53 
   2   4   2    1.47    0.43 
   2   4   2    1.19    0.86 
   1   4   3   43.86    1.64 
   1   4   3   41.01    1.18 
   0   4   4  239.54    3.15 
   0   4   4  237.49    3.53 
  -1   4   5   37.95    1.29 
  -1   4   5   38.06    1.51 
  -2   4   6    0.71    0.58 
  -2   4   6   -0.16    0.49 
  -3   4   7   13.25    1.03 
  -3   4   7   15.56    1.19 
  -4   4   8   16.54    1.23 
  -4   4   8   15.68    1.25 
  -5   4   9   -0.46    0.64 
  -5   4   9    0.71    0.67 
  -6   4  10    3.59    0.83 
  -6   4  10    2.49    0.80 
  -7   4  11   31.77    1.80 
  -7   4  11   27.76    1.65 
  -8   4  12    5.26    0.99 
  -9   4  13    1.68    0.92 
 -10   4  14    1.34    1.00 
  11   3  -6    0.84    1.58 
  10   3  -5    2.99    1.46 
   9   3  -4    5.09    1.64 
  -8  -3   3    0.29    0.52 
   8   3  -3    0.68    1.31 
  -7  -3   2    3.18    0.62 
   7   3  -2    2.23    1.40 
  -6  -3   1    9.67    0.81 
   6   3  -1    8.48    1.56 
   6   3  -1    8.40    0.82 
  -5  -3   0    0.64    0.57 
   5   3   0    1.39    0.50 
   5   3   0    1.83    1.22 
  -4  -3  -1   10.81    0.83 
   4   3   1    9.39    1.32 
   4   3   1   11.71    0.67 
   3   3   2    1.33    0.86 
   3   3   2    2.05    0.36 
   2   3   3    0.71    0.79 
   2   3   3   -0.19    0.30 
   1   3   4   95.51    1.63 
   1   3   4  100.35    2.22 
   0   3   5   19.28    0.89 
   0   3   5   20.05    1.18 
  -1   3   6   39.43    1.28 
  -1   3   6   39.77    1.50 
  -2   3   7    7.50    0.87 
  -2   3   7    7.08    0.74 
  -3   3   8    0.76    0.62 
  -3   3   8    2.20    0.73 
  -4   3   9   12.88    1.13 
  -4   3   9   11.49    1.06 
  -5   3  10    0.10    0.68 
  -5   3  10    0.66    0.76 
  -6   3  11   14.74    1.34 
  -6   3  11   14.56    1.35 
  -7   3  12   -1.05    0.70 
  -8   3  13    2.92    0.96 
  -9   3  14    3.11    1.05 
 -10   3  15    2.01    1.11 
  11   2  -5    0.86    1.52 
  10   2  -4    2.56    1.43 
  -9  -2   3    2.26    0.64 
   9   2  -3    2.03    1.42 
  -8  -2   2   10.68    0.89 
   8   2  -2   11.44    1.68 
  -7  -2   1    4.93    0.69 
   7   2  -1    1.44    1.41 
  -6  -2   0   30.81    1.18 
   6   2   0   27.15    2.01 
  -5  -2  -1    6.06    0.69 
   5   2   1    6.01    1.21 
  -4  -2  -2    9.54    0.78 
   4   2   2    8.88    1.19 
   3   2   3    6.51    0.40 
   3   2   3    6.56    1.02 
   2   2   4   18.16    0.65 
   2   2   4   19.99    1.33 
   1   2   5    3.43    0.44 
   1   2   5    2.90    0.69 
   0   2   6    5.55    0.79 
   0   2   6    6.34    0.58 
  -1   2   7   -0.33    0.42 
  -1   2   7    0.36    0.52 
  -2   2   8   12.66    0.94 
  -2   2   8   15.31    1.18 
  -3   2   9    6.85    0.88 
  -3   2   9    7.28    0.87 
  -4   2  10   -0.56    0.57 
  -4   2  10   -0.36    0.62 
  -5   2  11    4.82    0.96 
  -6   2  12    1.84    0.80 
  -7   2  13    2.41    0.85 
  -8   2  14    0.21    0.79 
  -9   2  15    1.10    1.03 
  12   1  -5    4.79    1.87 
  11   1  -4    0.92    1.50 
 -10  -1   3    0.85    0.61 
  10   1  -3   -2.34    1.18 
  -9  -1   2    3.77    0.72 
   9   1  -2    2.27    1.31 
  -8  -1   1   12.42    0.97 
   8   1  -1   15.05    1.85 
  -7  -1   0    2.28    0.61 
   7   1   0    1.58    1.22 
  -6  -1  -1    2.38    0.62 
   6   1   1    3.04    1.26 
  -5  -1  -2    0.15    0.50 
   5   1   2   -0.16    1.01 
  -4  -1  -3    3.51    0.62 
   4   1   3    3.68    0.98 
  -3  -1  -4   59.02    1.44 
   3   1   4   59.34    1.90 
   2   1   5   40.75    1.55 
   1   1   6    2.98    0.67 
   0   1   7    4.24    0.68 
  -1   1   8  106.69    2.28 
  -2   1   9    0.41    0.63 
  -3   1  10    9.47    1.05 
  -4   1  11    1.28    0.77 
  -5   1  12    0.55    0.79 
  -6   1  13    8.34    1.16 
  -7   1  14    1.18    0.89 
  -8   1  15    0.29    0.88 
  -9   1  16   -0.84    0.94 
  12   0  -4    0.57    1.57 
  11   0  -3    4.99    1.63 
 -10   0   2    0.46    0.63 
  10   0  -2    4.68    1.45 
  -9   0   1    0.50    0.56 
   9   0  -1    1.29    1.33 
  -8   0   0    0.66    0.59 
   8   0   0    0.66    1.33 
  -7   0  -1   18.24    1.03 
   7   0   1   14.63    1.62 
  -6   0  -2   23.41    1.12 
   6   0   2   24.18    1.81 
  -5   0  -3   20.41    1.04 
   5   0   3   24.00    1.84 
  -4   0  -4   18.28    0.98 
   4   0   4   18.43    1.37 
  -3   0  -5   36.22    0.83 
  -3   0  -5   38.33    1.24 
   3   0   5   37.68    1.65 
  -2   0  -6   13.99    0.84 
   2   0   6   14.30    1.06 
   1   0   7   -0.96    0.54 
   0   0   8   12.79    1.01 
  -1   0   9    1.38    0.60 
  -2   0  10    2.72    0.71 
  -3   0  11    0.50    0.67 
  -4   0  12   22.10    1.47 
  -5   0  13    2.45    0.83 
  -6   0  14    9.60    1.27 
  -7   0  15    5.15    1.17 
  -8   0  16    7.83    1.39 
  12  -1  -3    0.64    1.51 
 -11   1   2    6.76    0.93 
  11  -1  -2    7.96    1.73 
 -10   1   1    5.55    0.82 
  10  -1  -1    4.83    1.50 
  -9   1   0    7.79    0.90 
   9  -1   0    6.86    1.51 
  -8   1  -1    9.95    0.94 
   8  -1   1    8.91    1.59 
  -7   1  -2   12.77    0.99 
   7  -1   2   14.94    1.54 
  -6   1  -3   21.51    1.11 
   6  -1   3   20.19    1.64 
  -5   1  -4   10.22    0.83 
   5  -1   4    9.05    1.16 
  -4   1  -5   65.85    1.60 
  -4   1  -5   66.49    1.04 
   4  -1   5   66.57    2.04 
  -3   1  -6  117.59    1.79 
  -3   1  -6  116.97    2.10 
   3  -1   6  119.86    2.42 
  -2   1  -7    4.97    0.63 
  -2   1  -7    5.12    0.60 
   2  -1   7    5.96    0.80 
  -1   1  -8    1.14    0.53 
   1  -1   8    1.08    0.56 
   0   1  -9    0.43    0.50 
   0  -1   9    1.20    0.58 
  -1  -1  10    5.97    0.84 
  -2  -1  11    3.66    0.80 
  -3  -1  12   16.79    1.33 
  -4  -1  13    0.49    0.79 
  -5  -1  14    2.93    0.97 
  -6  -1  15    7.19    1.22 
  -7  -1  16   10.49    1.43 
  -8  -1  17    4.62    1.28 
  13  -2  -3    2.31    1.65 
 -12   2   2   14.70    1.27 
  12  -2  -2   12.70    1.94 
 -11   2   1   11.63    1.11 
  11  -2  -1    9.94    1.76 
 -10   2   0   -1.27    0.54 
  10  -2   0    2.46    1.36 
  -9   2  -1    7.43    0.92 
   9  -2   1    6.28    1.47 
  -8   2  -2   20.67    1.22 
   8  -2   2   16.95    1.77 
  -7   2  -3   27.03    1.24 
   7  -2   3   29.98    2.06 
  -6   2  -4    2.17    0.61 
   6  -2   4    1.52    1.05 
  -5   2  -5   20.05    1.01 
  -5   2  -5   19.15    0.61 
   5  -2   5   19.58    1.54 
  -4   2  -6   40.43    1.20 
  -4   2  -6   38.37    1.31 
   4  -2   6   41.22    1.63 
  -3   2  -7   13.20    0.85 
  -3   2  -7   14.17    1.09 
   3  -2   7   15.36    1.16 
  -2   2  -8   58.15    1.58 
  -2   2  -8   54.57    1.46 
   2  -2   8   55.58    1.63 
  -1   2  -9   16.47    1.24 
  -1   2  -9   20.05    0.99 
   1  -2   9   19.43    1.20 
   0   2 -10    3.32    0.60 
   0  -2  10    2.37    0.70 
   1   2 -11    0.11    0.55 
  -1  -2  11    0.59    0.70 
   2   2 -12   30.15    1.12 
  -2  -2  12   26.81    1.46 
   3   2 -13   34.52    1.22 
  -3  -2  13   38.47    1.86 
  -4  -2  14    7.07    1.14 
  -5  -2  15    4.81    1.04 
  -6  -2  16    6.12    1.23 
  -7  -2  17    8.46    1.37 
 -13   3   2    4.31    0.98 
  13  -3  -2    6.17    1.84 
 -12   3   1   10.91    1.21 
  12  -3  -1   10.82    1.82 
 -11   3   0    3.18    0.81 
  11  -3   0    1.98    1.39 
 -10   3  -1    2.80    0.79 
  10  -3   1    1.87    1.34 
  -9   3  -2   17.98    1.24 
   9  -3   2   17.55    1.70 
  -8   3  -3   31.29    1.45 
   8  -3   3   33.07    2.16 
  -7   3  -4    3.26    0.77 
   7  -3   4    3.58    1.15 
  -6   3  -5    0.74    0.57 
  -6   3  -5    0.60    0.33 
   6  -3   5    0.92    0.95 
  -5   3  -6   21.70    1.14 
  -5   3  -6   23.62    0.96 
   5  -3   6   26.15    1.64 
  -4   3  -7   39.77    1.41 
  -4   3  -7   42.42    1.40 
   4  -3   7   39.27    1.50 
  -3   3  -8    2.36    0.58 
  -3   3  -8    2.65    0.74 
   3  -3   8    1.66    0.65 
  -2   3  -9   27.94    1.58 
  -2   3  -9   24.99    1.11 
   2  -3   9   25.91    1.28 
  -1   3 -10   12.88    0.89 
  -1   3 -10   10.73    1.13 
   1  -3  10   12.46    1.02 
   0   3 -11    1.13    0.55 
   0   3 -11    0.82    0.83 
   0  -3  11    1.13    0.63 
   1   3 -12    1.47    0.94 
   1   3 -12   -0.02    0.53 
  -1  -3  12    0.66    0.65 
   2   3 -13   50.45    2.47 
   2   3 -13   49.45    1.34 
  -2  -3  13   49.45    1.98 
   3   3 -14   46.80    2.31 
  -3  -3  14   48.15    1.95 
   4   3 -15   -0.12    0.97 
  -4  -3  15   -0.74    0.79 
   5   3 -16    3.79    1.28 
  -5  -3  16    3.71    1.07 
   6   3 -17    4.09    1.34 
  -6  -3  17    4.36    1.18 
   7   3 -18   11.37    1.91 
  -7  -3  18    6.00    1.39 
 -13   4   1    0.19    0.78 
  13  -4  -1    1.79    1.58 
 -12   4   0   10.90    1.21 
  12  -4   0    9.03    1.73 
 -11   4  -1    1.40    0.77 
  11  -4   1    1.16    1.22 
 -10   4  -2    4.22    0.85 
  10  -4   2    1.84    1.19 
  -9   4  -3   21.61    1.34 
   9  -4   3   20.72    1.72 
  -8   4  -4    0.18    0.61 
   8  -4   4   -0.04    1.03 
  -7   4  -5   12.44    1.09 
   7  -4   5   12.54    1.37 
  -6   4  -6    1.52    0.63 
  -6   4  -6    1.09    0.49 
   6  -4   6    1.47    0.87 
  -5   4  -7    2.59    0.71 
  -5   4  -7    3.75    0.72 
   5  -4   7    2.02    0.80 
  -4   4  -8    1.19    0.81 
  -4   4  -8    3.05    0.69 
   4  -4   8    4.73    0.77 
  -3   4  -9    0.68    0.53 
  -3   4  -9    1.56    0.87 
   3  -4   9    0.88    0.62 
  -2   4 -10    8.48    0.81 
  -2   4 -10    7.36    1.12 
   2  -4  10    9.67    0.92 
  -1   4 -11   46.60    2.15 
  -1   4 -11   41.85    1.34 
   1  -4  11   43.70    1.65 
   0   4 -12    7.14    0.76 
   0   4 -12    5.39    1.24 
   0  -4  12    7.64    0.93 
   1   4 -13    3.90    0.63 
   1   4 -13    3.02    1.27 
  -1  -4  13    2.19    0.75 
   2   4 -14   10.39    1.55 
  -2  -4  14   15.79    1.36 
   3   4 -15    6.98    1.42 
  -3  -4  15    7.08    1.15 
   4   4 -16    2.54    1.33 
  -4  -4  16   -0.51    0.76 
   5   4 -17    2.65    1.38 
  -5  -4  17    0.66    0.95 
   6   4 -18    3.10    1.46 
  -6  -4  18    2.94    1.17 
 -13   5   0    3.18    0.96 
 -12   5  -1    4.48    0.99 
 -11   5  -2    0.00    0.71 
  11  -5   2    0.83    1.13 
 -10   5  -3   16.77    1.32 
  10  -5   3   15.92    1.63 
  -9   5  -4    9.45    1.09 
   9  -5   4   12.78    1.39 
  -8   5  -5    2.81    0.75 
   8  -5   5    0.76    1.00 
  -7   5  -6    7.32    0.71 
  -7   5  -6    7.29    0.98 
   7  -5   6    7.79    1.11 
  -6   5  -7    0.00    0.61 
  -6   5  -7    0.32    0.68 
   6  -5   7   -0.16    0.75 
  -5   5  -8   12.06    1.11 
  -5   5  -8   12.46    1.04 
   5  -5   8   11.99    1.03 
  -4   5  -9    2.50    0.68 
  -4   5  -9    2.23    0.93 
   4  -5   9    1.68    0.66 
  -3   5 -10    5.30    1.13 
  -3   5 -10    6.50    0.78 
   3  -5  10    6.34    0.81 
  -2   5 -11   12.62    0.97 
  -2   5 -11   10.71    1.41 
   2  -5  11   13.25    1.03 
  -1   5 -12    8.15    1.34 
  -1   5 -12    4.83    0.72 
   1  -5  12    5.82    0.86 
   0   5 -13    1.12    1.12 
   0   5 -13    0.20    0.51 
   0  -5  13    0.47    0.71 
   1   5 -14    2.13    1.16 
  -1  -5  14    1.03    0.73 
   2   5 -15   13.61    1.78 
  -2  -5  15   16.85    1.43 
   3   5 -16    1.79    1.29 
  -3  -5  16    0.84    0.88 
   4   5 -17    2.60    1.49 
  -4  -5  17    0.97    0.92 
   5   5 -18    1.08    1.37 
  -5  -5  18    3.87    1.19 
 -13   6  -1    0.02    0.79 
 -12   6  -2    0.72    0.80 
 -11   6  -3    0.82    0.79 
 -10   6  -4    4.46    0.96 
  -9   6  -5    2.70    0.78 
  -8   6  -6    0.92    0.72 
  -7   6  -7    0.10    0.63 
  -7   6  -7    0.48    0.59 
   7  -6   7   -0.94    0.69 
  -6   6  -8    0.30    0.65 
  -6   6  -8    0.44    0.72 
   6  -6   8    0.16    0.66 
  -5   6  -9   11.15    1.23 
  -5   6  -9    9.88    0.98 
   5  -6   9    8.20    0.84 
  -4   6 -10    0.92    0.70 
  -4   6 -10    1.01    1.08 
   4  -6  10    1.65    0.62 
  -3   6 -11    3.38    0.76 
  -3   6 -11    1.76    1.20 
   3  -6  11    3.67    0.71 
  -2   6 -12    0.15    1.21 
  -2   6 -12   -0.28    0.57 
   2  -6  12   -0.25    0.57 
  -1   6 -13    5.15    0.72 
  -1   6 -13    5.17    1.43 
   1  -6  13    4.38    0.81 
   0   6 -14    2.08    1.21 
   0   6 -14    0.44    0.51 
   0  -6  14    0.63    0.70 
   1   6 -15    9.41    1.63 
  -1  -6  15   12.15    1.24 
   2   6 -16    0.21    1.29 
  -2  -6  16    0.73    0.83 
   3   6 -17   -1.87    1.35 
  -3  -6  17    1.43    0.91 
   4   6 -18   11.96    2.09 
  -4  -6  18   16.01    1.63 
   5   6 -19   -1.30    1.65 
 -12   7  -3    0.89    0.85 
 -11   7  -4    0.56    0.81 
 -10   7  -5    2.34    0.86 
  -9   7  -6    1.45    0.72 
  -8   7  -7    4.49    0.89 
  -7   7  -8    0.31    0.68 
  -7   7  -8    0.03    0.64 
  -6   7  -9    1.70    0.69 
  -6   7  -9    1.30    0.79 
  -5   7 -10    1.04    0.69 
  -5   7 -10    1.68    1.03 
  -4   7 -11   -0.68    0.58 
  -4   7 -11   -0.37    1.02 
   4  -7  11    0.46    0.55 
  -3   7 -12    7.61    0.91 
  -3   7 -12    6.71    1.40 
   3  -7  12    7.95    0.85 
  -2   7 -13   -0.87    1.16 
  -2   7 -13    1.03    0.55 
   2  -7  13   -0.29    0.57 
  -1   7 -14    0.46    0.52 
  -1   7 -14   -0.51    1.20 
   1  -7  14    1.24    0.70 
   0   7 -15    3.03    1.43 
   0  -7  15    3.29    0.84 
   1   7 -16    6.77    1.83 
  -1  -7  16    6.90    1.08 
   2   7 -17   13.51    2.12 
  -2  -7  17    9.59    1.23 
   3   7 -18    0.99    1.57 
  -3  -7  18    2.20    0.98 
   4   7 -19    4.87    1.91 
  -4  -7  19    2.10    1.11 
 -12   8  -4    1.27    0.90 
 -11   8  -5    0.20    0.79 
 -10   8  -6   -0.86    0.75 
  -9   8  -7    1.24    0.77 
  -8   8  -8    1.20    0.73 
  -7   8  -9    3.98    0.90 
  -7   8  -9    4.96    0.99 
  -6   8 -10    0.43    0.65 
  -6   8 -10   -1.23    0.79 
  -5   8 -11    0.55    0.65 
  -5   8 -11   -0.41    1.04 
  -4   8 -12    6.30    1.36 
  -4   8 -12    5.45    0.84 
  -3   8 -13    0.04    1.23 
  -3   8 -13    0.21    0.61 
  -2   8 -14    0.51    0.58 
  -2   8 -14    1.26    1.41 
  -1   8 -15    0.31    1.33 
   1  -8  15    1.73    0.75 
   0   8 -16   -0.13    1.58 
   0  -8  16    0.48    0.76 
   1   8 -17   -0.63    1.64 
  -1  -8  17    0.40    0.77 
   2   8 -18    0.82    1.83 
  -2  -8  18    1.07    0.92 
 -12   9  -5   -0.75    0.80 
 -11   9  -6    1.34    0.87 
 -10   9  -7    2.44    0.96 
  -9   9  -8    1.22    0.85 
  -8   9  -9    0.34    0.78 
  -7   9 -10   -0.53    0.86 
  -7   9 -10    0.95    0.77 
  -6   9 -11    1.08    0.75 
  -6   9 -11    0.75    1.00 
  -5   9 -12    0.88    0.68 
  -5   9 -12   -0.89    1.06 
  -4   9 -13   -0.06    1.23 
  -4   9 -13    1.11    0.69 
  -3   9 -14   -1.20    0.53 
  -3   9 -14   -0.87    1.34 
  -2   9 -15   -1.26    1.40 
  -1   9 -16    0.19    1.57 
   0   9 -17    1.63    1.75 
   1   9 -18   -0.31    1.71 
 -11  10  -7    0.31    0.79 
 -10  10  -8   -0.05    0.81 
  -9  10  -9    0.74    0.83 
  -8  10 -10   -0.18    0.67 
  -7  10 -11    1.97    0.85 
  -7  10 -11    0.36    0.95 
  -6  10 -12    1.11    1.10 
  -6  10 -12   -0.09    0.67 
  -5  10 -13    0.08    0.68 
  -5  10 -13   -0.49    1.15 
  -4  10 -14    1.03    0.66 
  -4  10 -14    3.58    1.45 
  -3  10 -15    3.00    1.62 
  -2  10 -16    0.38    1.48 
  -1  10 -17   -1.98    1.49 
   0  10 -18   -3.36    1.85 
 -10  11  -9    0.24    0.87 
  -9  11 -10    1.17    0.90 
  -8  11 -11    0.57    0.78 
  -8  11 -11   -1.39    0.91 
  -7  11 -12    1.69    0.79 
  -7  11 -12    1.87    1.17 
  -6  11 -13    0.27    0.69 
  -6  11 -13   -0.16    1.17 
  -5  11 -14    5.32    0.92 
  -5  11 -14    5.79    1.60 
  -4  11 -15    2.88    1.51 
  -3  11 -16   -0.51    1.58 
  -2  11 -17   -0.13    1.77 
  -8  12 -12   -1.47    0.67 
  -7  12 -13    0.39    0.78 
  -7  12 -13   -0.87    1.16 
  -6  12 -14    1.06    0.79 
  -6  12 -14   -1.21    1.25 
  -5  12 -15    1.68    1.60 
  -3  15  -3    1.36    1.20 
  -4  15  -2    0.80    1.09 
  -5  15  -1    5.93    1.41 
   0  14  -5    2.65    1.30 
  -1  14  -4    1.76    1.14 
  -2  14  -3    1.20    1.13 
  -3  14  -2    3.23    1.13 
  -4  14  -1    0.44    1.06 
  -5  14   0    0.32    0.93 
  -6  14   1    6.22    1.37 
  -7  14   2    1.35    1.10 
   2  13  -6    1.36    1.18 
   1  13  -5   -0.46    1.01 
   0  13  -4   10.61    1.54 
  -1  13  -3    3.30    1.11 
  -2  13  -2    0.28    0.90 
  -3  13  -1    0.33    0.98 
  -4  13   0    0.29    0.93 
  -5  13   1    1.24    1.00 
  -6  13   2   -0.51    0.94 
  -7  13   3   -0.25    0.84 
  -8  13   4   -0.53    0.98 
   4  12  -7    2.72    1.60 
   4  12  -7   -0.71    1.25 
   3  12  -6   -0.08    1.45 
   3  12  -6   -1.09    1.02 
   2  12  -5   10.31    1.50 
   2  12  -5   12.03    1.65 
   1  12  -4   10.88    1.42 
   0  12  -3    6.95    1.27 
  -1  12  -2    0.17    0.95 
  -2  12  -1    1.74    1.00 
  -3  12   0   13.28    1.46 
  -4  12   1    0.65    0.93 
  -5  12   2    0.16    0.81 
  -6  12   3    3.80    1.07 
  -7  12   4    2.01    1.04 
  -8  12   5    0.42    0.98 
  -9  12   6    1.75    1.05 
   5  11  -7    6.64    1.75 
   4  11  -6    2.34    1.43 
   4  11  -6    3.75    1.22 
   3  11  -5    4.86    1.52 
   3  11  -5    1.95    1.10 
   2  11  -4   -1.08    1.14 
   2  11  -4   -1.20    0.91 
   1  11  -3   12.23    1.55 
   1  11  -3   10.47    1.32 
   0  11  -2    0.35    1.03 
   0  11  -2    2.92    1.02 
  -1  11  -1    1.19    0.93 
  -1  11  -1   -0.71    0.83 
  -2  11   0   -0.92    0.79 
  -3  11   1    0.53    0.85 
  -4  11   2   -0.76    0.79 
  -5  11   3    0.53    0.82 
  -6  11   4    7.90    1.23 
  -7  11   5    0.56    0.82 
  -8  11   6    6.33    1.21 
  -9  11   7    0.52    1.03 
   6  10  -7    5.22    1.79 
   5  10  -6    1.34    1.18 
   5  10  -6    4.16    1.54 
   4  10  -5    1.30    1.02 
   4  10  -5    0.68    1.29 
   3  10  -4    0.92    1.29 
   3  10  -4    0.20    0.94 
   2  10  -3    8.07    1.49 
   2  10  -3    8.31    1.24 
   1  10  -2    6.57    1.23 
   1  10  -2    6.16    1.12 
   0  10  -1   -0.15    0.97 
   0  10  -1    0.08    0.76 
  -1  10   0   21.37    1.64 
  -1  10   0   18.98    1.43 
  -2  10   1    0.31    0.78 
  -2  10   1    2.24    0.89 
  -3  10   2    0.59    0.82 
  -3  10   2    0.72    0.69 
  -4  10   3    8.06    1.17 
  -4  10   3    8.28    0.97 
  -5  10   4    3.08    0.90 
  -6  10   5   -0.50    0.76 
  -7  10   6    0.34    0.88 
  -8  10   7    4.15    1.16 
  -9  10   8    0.88    0.91 
 -10  10   9   -0.59    0.98 
   7   9  -7    8.16    1.80 
   6   9  -6   13.78    2.05 
   5   9  -5    1.31    1.41 
   5   9  -5    1.75    1.05 
   4   9  -4   -1.43    0.88 
   4   9  -4    0.34    1.27 
   3   9  -3    7.56    1.45 
   3   9  -3    5.91    1.12 
   2   9  -2    3.22    0.98 
   2   9  -2    5.09    1.26 
   1   9  -1    1.32    0.83 
   1   9  -1    0.61    1.03 
   0   9   0    4.93    0.95 
   0   9   0    6.66    1.20 
  -1   9   1   -0.31    0.88 
  -1   9   1    0.24    0.77 
  -2   9   2    6.35    1.06 
  -2   9   2    5.74    0.98 
  -3   9   3    2.90    0.82 
  -3   9   3    2.05    0.76 
  -4   9   4   15.66    1.40 
  -4   9   4   17.00    1.26 
  -5   9   5   23.77    1.34 
  -5   9   5   24.06    1.59 
  -6   9   6    2.53    0.73 
  -6   9   6    2.73    0.91 
  -7   9   7    8.91    1.21 
  -7   9   7   10.15    1.09 
  -8   9   8   17.96    1.69 
  -9   9   9    0.46    0.91 
 -10   9  10    1.46    1.05 
   8   8  -7    2.46    1.67 
   7   8  -6   14.59    2.09 
   6   8  -5    7.67    1.71 
   5   8  -4    3.25    1.42 
   5   8  -4   -0.13    0.92 
   4   8  -3    0.52    0.87 
   4   8  -3    0.75    1.23 
   3   8  -2   19.63    1.50 
   3   8  -2   22.14    1.94 
   2   8  -1    9.17    1.43 
   2   8  -1    7.93    1.06 
   1   8   0    1.82    0.83 
   1   8   0    3.73    1.18 
   0   8   1   17.37    1.28 
   0   8   1   20.31    1.54 
  -1   8   2   11.81    1.15 
  -1   8   2   11.46    1.15 
  -2   8   3    4.40    0.87 
  -2   8   3    3.44    0.87 
  -3   8   4    4.16    0.83 
  -3   8   4    3.62    0.91 
  -4   8   5   48.86    1.80 
  -4   8   5   50.45    1.99 
  -5   8   6    2.89    0.75 
  -5   8   6    3.89    0.90 
  -6   8   7    0.20    0.69 
  -6   8   7    0.07    0.58 
  -7   8   8    2.30    0.80 
  -7   8   8    2.07    0.86 
  -8   8   9    2.92    0.84 
  -8   8   9    2.93    1.03 
  -9   8  10    1.02    0.94 
  -9   8  10    1.27    0.82 
 -10   8  11    0.68    0.86 
 -10   8  11   -0.81    0.92 
   9   7  -7    0.87    1.69 
   8   7  -6    1.17    1.49 
   7   7  -5   15.00    2.05 
   6   7  -4    1.28    1.42 
  -5  -7   3    0.86    0.60 
   5   7  -3    0.83    0.84 
   5   7  -3   -0.53    1.10 
   4   7  -2   17.89    1.79 
   4   7  -2   12.81    1.18 
   3   7  -1   20.99    1.49 
   3   7  -1   20.12    1.88 
   2   7   0    6.55    1.36 
   2   7   0    7.84    0.93 
   1   7   1   12.05    1.05 
   1   7   1   12.47    1.36 
   0   7   2   27.09    1.87 
   0   7   2   26.46    1.41 
  -1   7   3    7.01    0.99 
  -1   7   3    6.47    0.84 
  -2   7   4    8.69    1.03 
  -2   7   4    8.94    0.98 
  -3   7   5   14.61    1.18 
  -3   7   5   13.02    1.13 
  -4   7   6   16.53    1.25 
  -4   7   6   13.64    1.21 
  -5   7   7    7.16    0.96 
  -5   7   7    7.42    1.09 
  -6   7   8    1.64    0.84 
  -6   7   8    2.45    0.74 
  -7   7   9    1.99    0.86 
  -7   7   9    0.60    0.75 
  -8   7  10    1.75    0.84 
  -8   7  10    2.19    0.96 
  -9   7  11   -0.02    0.71 
  -9   7  11    0.09    0.82 
 -10   7  12    3.07    1.00 
 -10   7  12    1.52    1.13 
   9   6  -6    3.99    1.74 
   8   6  -5   15.66    2.16 
   7   6  -4    9.12    1.70 
   6   6  -3   -1.15    1.15 
  -5  -6   2    5.70    0.77 
   5   6  -2    7.68    1.47 
   5   6  -2    7.40    0.98 
   4   6  -1   80.18    2.04 
   4   6  -1   80.50    3.14 
   3   6   0    6.33    0.82 
   3   6   0    6.28    1.40 
   2   6   1    3.93    0.73 
   2   6   1    5.51    1.14 
   1   6   2   27.67    1.27 
   1   6   2   29.06    1.86 
   0   6   3   29.58    1.31 
   0   6   3   30.06    1.69 
  -1   6   4    3.14    0.68 
  -1   6   4    3.65    0.85 
  -2   6   5   11.24    1.06 
  -2   6   5    6.96    0.89 
  -3   6   6   46.51    1.73 
  -3   6   6   45.29    1.72 
  -4   6   7    1.13    0.70 
  -4   6   7    2.46    0.80 
  -5   6   8    9.70    1.15 
  -5   6   8    7.83    0.99 
  -6   6   9   15.45    1.29 
  -6   6   9   13.05    1.32 
  -7   6  10    4.84    0.96 
  -7   6  10    5.09    1.01 
  -8   6  11    0.02    0.73 
  -8   6  11   -0.13    0.85 
  -9   6  12    3.56    0.96 
  -9   6  12    3.31    1.10 
 -10   6  13   13.52    1.56 
  10   5  -6    0.74    1.62 
   9   5  -5   10.62    1.94 
   8   5  -4   12.60    2.00 
   7   5  -3    2.00    1.40 
  -6  -5   2    1.97    0.60 
   6   5  -2    0.42    1.29 
  -5  -5   1    7.45    0.84 
   5   5  -1    6.43    0.85 
   5   5  -1    9.57    1.56 
   4   5   0   14.26    1.07 
   4   5   0   15.37    1.65 
   3   5   1    0.66    1.13 
   3   5   1    0.07    0.50 
   2   5   2   13.91    0.94 
   2   5   2   13.89    1.40 
   1   5   3    2.67    0.95 
   1   5   3    4.19    0.61 
   0   5   4    0.73    0.49 
   0   5   4    1.01    0.76 
  -1   5   5    2.75    0.79 
  -1   5   5    1.96    0.53 
  -2   5   6   14.09    1.14 
  -2   5   6   13.01    1.03 
  -3   5   7   33.14    1.57 
  -3   5   7   34.24    1.58 
  -4   5   8   -0.19    0.61 
  -4   5   8    0.57    0.64 
  -5   5   9    0.28    0.71 
  -5   5   9    0.55    0.77 
  -6   5  10    5.19    0.98 
  -6   5  10    5.87    0.99 
  -7   5  11   18.84    1.48 
  -7   5  11   21.52    1.60 
  -8   5  12    6.58    1.11 
  -8   5  12    4.95    1.11 
  -9   5  13    4.44    1.06 
 -10   5  14   12.27    1.51 
  10   4  -5    1.19    1.55 
   9   4  -4   11.44    1.96 
   8   4  -3    2.11    1.53 
  -7  -4   2    2.52    0.64 
   7   4  -2    2.77    1.33 
  -6  -4   1    3.97    0.71 
   6   4  -1    5.09    1.54 
  -5  -4   0   20.99    1.08 
   5   4   0   22.98    1.06 
   5   4   0   20.68    1.87 
   4   4   1    0.62    1.15 
   4   4   1    0.15    0.44 
   3   4   2    4.00    1.16 
   3   4   2    3.67    0.49 
   2   4   3   42.28    1.12 
   2   4   3   39.92    2.01 
   1   4   4   56.12    1.37 
   1   4   4   54.47    1.87 
   0   4   5    0.15    0.68 
   0   4   5    0.19    0.42 
  -1   4   6    2.59    0.77 
  -1   4   6    2.56    0.55 
  -2   4   7   18.74    1.10 
  -2   4   7   19.67    1.23 
  -3   4   8   20.80    1.38 
  -3   4   8   19.34    1.22 
  -4   4   9    1.92    0.79 
  -4   4   9    0.37    0.70 
  -5   4  10   30.45    1.75 
  -5   4  10   27.82    1.49 
  -6   4  11    7.42    1.06 
  -6   4  11    7.45    1.08 
  -7   4  12    0.77    0.87 
  -7   4  12    1.36    0.81 
  -8   4  13    3.18    0.98 
  -9   4  14    2.68    1.02 
  11   3  -5    2.91    1.73 
  10   3  -4    0.67    1.37 
   9   3  -3    4.86    1.63 
  -8  -3   2    0.58    0.56 
   8   3  -2    0.95    1.39 
  -7  -3   1    4.39    0.68 
   7   3  -1    1.71    1.44 
  -6  -3   0   17.09    1.00 
   6   3   0   14.79    1.77 
  -5  -3  -1    1.85    0.64 
   5   3   1    1.69    1.23 
   5   3   1    0.97    0.34 
  -4  -3  -2    3.95    0.71 
   4   3   2    4.13    0.38 
   4   3   2    2.91    1.11 
   3   3   3    1.37    0.85 
   3   3   3    1.38    0.33 
   2   3   4    3.26    0.84 
   2   3   4    3.67    0.43 
   1   3   5    1.19    0.68 
   1   3   5    0.45    0.38 
   0   3   6   16.28    1.16 
   0   3   6   14.65    0.91 
  -1   3   7   14.90    0.99 
  -1   3   7   13.55    1.10 
  -2   3   8   23.57    1.32 
  -2   3   8   26.23    1.30 
  -3   3   9    3.95    0.87 
  -3   3   9    2.88    0.74 
  -4   3  10    0.60    0.71 
  -4   3  10    1.72    0.73 
  -5   3  11    5.87    1.02 
  -5   3  11    5.76    0.99 
  -6   3  12    2.40    0.89 
  -7   3  13    0.33    0.83 
  -8   3  14    1.81    0.86 
  -9   3  15    2.60    1.00 
  11   2  -4   -0.60    1.52 
  10   2  -3   13.06    2.05 
  -9  -2   2   -0.20    0.55 
   9   2  -2    0.82    1.42 
  -8  -2   1    8.93    0.85 
   8   2  -1    8.44    1.60 
  -7  -2   0    4.85    0.74 
   7   2   0    4.06    1.56 
  -6  -2  -1   -0.27    0.55 
   6   2   1    1.83    1.19 
  -5  -2  -2    7.57    0.81 
   5   2   2    9.09    1.38 
  -4  -2  -3    8.02    0.81 
   4   2   3    7.79    1.18 
   3   2   4   14.38    0.54 
   3   2   4   10.40    1.15 
   2   2   5    2.15    0.36 
   2   2   5    1.84    0.81 
   1   2   6    2.52    0.75 
   1   2   6    1.63    0.41 
   0   2   7   26.58    1.05 
   0   2   7   24.39    1.29 
  -1   2   8    8.55    0.80 
  -1   2   8    8.15    0.90 
  -2   2   9    2.49    0.69 
  -2   2   9    1.68    0.74 
  -3   2  10    0.56    0.69 
  -3   2  10    1.53    0.77 
  -4   2  11    0.53    0.71 
  -5   2  12    1.05    0.83 
  -6   2  13    1.20    0.83 
  -7   2  14    0.94    0.88 
  -8   2  15   13.72    1.50 
  -9   2  16    0.06    0.98 
  12   1  -4    1.35    1.73 
  11   1  -3    0.53    1.55 
 -10  -1   2    3.55    0.78 
  10   1  -2    1.04    1.39 
  -9  -1   1    3.55    0.74 
   9   1  -1    2.82    1.37 
  -8  -1   0    0.34    0.58 
   8   1   0    1.06    1.26 
  -7  -1  -1    3.02    0.71 
   7   1   1    3.46    1.49 
  -6  -1  -2    7.53    0.81 
   6   1   2    4.34    1.35 
  -5  -1  -3   42.29    1.40 
   5   1   3   45.39    2.30 
  -4  -1  -4    6.54    0.74 
   4   1   4    7.17    1.16 
  -3  -1  -5   65.93    1.64 
   3   1   5   64.01    2.02 
   2   1   6   19.47    1.41 
   1   1   7   14.52    1.13 
   0   1   8    4.72    0.76 
  -1   1   9    0.23    0.59 
  -2   1  10    0.20    0.65 
  -3   1  11    0.14    0.66 
  -4   1  12    0.54    0.73 
  -5   1  13    2.84    0.92 
  -6   1  14    0.72    0.82 
  -7   1  15   10.75    1.39 
  -8   1  16    6.46    1.25 
  12   0  -3    0.89    1.62 
 -11   0   2    1.44    0.74 
  11   0  -2    3.33    1.61 
 -10   0   1    0.96    0.65 
  10   0  -1    1.47    1.46 
  -9   0   0    1.37    0.62 
   9   0   0    2.04    1.34 
  -8   0  -1    3.96    0.74 
   8   0   1    4.73    1.47 
  -7   0  -2    1.81    0.65 
   7   0   2    3.60    1.37 
  -6   0  -3    3.85    0.72 
   6   0   3    1.45    1.23 
  -5   0  -4    2.30    0.64 
   5   0   4    2.48    1.08 
  -4   0  -5   -0.37    0.53 
   4   0   5    0.04    0.80 
  -3   0  -6    0.30    0.35 
  -3   0  -6   -0.07    0.49 
   3   0   6   -0.70    0.65 
  -2   0  -7    2.13    0.61 
   2   0   7    2.67    0.71 
   1   0   8    8.33    0.89 
   0   0   9    7.05    0.91 
  -1   0  10    1.32    0.67 
  -2   0  11   -0.17    0.69 
  -3   0  12    0.61    0.71 
  -4   0  13    3.52    0.92 
  -5   0  14    0.29    0.76 
  -6   0  15    4.83    1.10 
  -7   0  16    0.41    0.91 
  -8   0  17    0.19    0.99 
 -12   1   2    1.74    0.81 
  12  -1  -2    2.36    1.60 
 -11   1   1   -0.67    0.61 
  11  -1  -1    1.33    1.47 
 -10   1   0    0.42    0.64 
  10  -1   0    1.23    1.40 
  -9   1  -1    2.91    0.73 
   9  -1   1    2.80    1.29 
  -8   1  -2   -1.29    0.56 
   8  -1   2   -0.41    1.23 
  -7   1  -3    0.86    0.64 
   7  -1   3    0.63    1.27 
  -6   1  -4    0.58    0.60 
   6  -1   4    1.70    1.11 
  -5   1  -5   -0.20    0.51 
   5  -1   5    0.66    0.98 
  -4   1  -6    0.48    0.55 
  -4   1  -6    0.23    0.43 
   4  -1   6   -0.43    0.79 
  -3   1  -7    0.31    0.47 
  -3   1  -7   -0.52    0.52 
   3  -1   7    0.22    0.71 
  -2   1  -8   -0.10    0.50 
  -2   1  -8    1.15    0.57 
   2  -1   8    0.59    0.67 
  -1   1  -9   11.29    0.88 
   1  -1   9   11.94    1.00 
   0   1 -10    0.58    0.57 
   0  -1  10    0.15    0.62 
  -1  -1  11    3.54    0.81 
  -2  -1  12    1.07    0.74 
  -3  -1  13   -0.40    0.76 
  -4  -1  14    1.35    0.85 
  -5  -1  15    1.16    0.91 
  -6  -1  16    0.26    0.90 
  -7  -1  17   -0.01    0.96 
 -12   2   1   -1.09    0.67 
  12  -2  -1   -0.31    1.42 
 -11   2   0    2.45    0.78 
  11  -2   0    1.49    1.39 
 -10   2  -1    0.26    0.66 
  10  -2   1    0.38    1.29 
  -9   2  -2    0.19    0.62 
   9  -2   2    1.50    1.22 
  -8   2  -3    0.75    0.66 
   8  -2   3    0.48    1.26 
  -7   2  -4    8.89    0.95 
   7  -2   4    8.80    1.48 
  -6   2  -5    0.26    0.55 
   6  -2   5    1.37    1.06 
  -5   2  -6    8.07    0.63 
  -5   2  -6    7.86    0.83 
   5  -2   6    8.38    1.15 
  -4   2  -7   24.52    1.14 
  -4   2  -7   22.86    1.21 
   4  -2   7   26.65    1.53 
  -3   2  -8    1.01    0.59 
  -3   2  -8    0.53    0.62 
   3  -2   8   -0.05    0.66 
  -2   2  -9    0.23    0.65 
  -2   2  -9   -0.49    0.50 
   2  -2   9   -0.78    0.60 
  -1   2 -10    7.01    0.93 
  -1   2 -10    8.32    0.82 
   1  -2  10   10.36    0.98 
   0   2 -11    2.27    0.63 
   0  -2  11    1.51    0.76 
   1   2 -12    1.89    0.66 
  -1  -2  12    1.00    0.72 
   2   2 -13    0.17    0.61 
  -2  -2  13    0.56    0.78 
   3   2 -14   15.22    0.97 
  -3  -2  14   11.12    1.22 
  -4  -2  15    4.06    0.98 
  -5  -2  16    1.21    0.87 
  -6  -2  17    2.48    1.11 
  -7  -2  18    0.19    1.07 
 -13   3   1   -0.19    0.76 
  13  -3  -1    1.06    1.65 
 -12   3   0    0.47    0.76 
  12  -3   0    0.85    1.46 
 -11   3  -1    1.49    0.78 
  11  -3   1   -0.10    1.29 
 -10   3  -2    2.03    0.76 
  10  -3   2    2.31    1.33 
  -9   3  -3    6.91    0.94 
   9  -3   3    5.82    1.37 
  -8   3  -4   10.70    1.03 
   8  -3   4   12.11    1.50 
  -7   3  -5    0.03    0.68 
   7  -3   5    0.55    1.08 
  -6   3  -6    0.86    0.61 
   6  -3   6    0.74    0.96 
  -5   3  -7   11.82    1.01 
  -5   3  -7   12.57    0.99 
   5  -3   7   10.31    1.13 
  -4   3  -8   16.54    1.04 
  -4   3  -8   15.44    1.10 
   4  -3   8   17.71    1.34 
  -3   3  -9    1.85    0.83 
  -3   3  -9    1.37    0.58 
   3  -3   9    1.26    0.69 
  -2   3 -10    8.34    0.82 
  -2   3 -10    9.48    1.06 
   2  -3  10    7.33    0.93 
  -1   3 -11    5.03    1.03 
  -1   3 -11    4.29    0.70 
   1  -3  11    3.92    0.77 
   0   3 -12   10.23    0.90 
   0   3 -12   10.36    1.24 
   0  -3  12   10.58    1.10 
   1   3 -13    0.92    1.10 
   1   3 -13    3.66    0.70 
  -1  -3  13    2.35    0.84 
   2   3 -14    3.73    0.66 
   2   3 -14    1.04    1.01 
  -2  -3  14    2.14    0.86 
   3   3 -15   10.28    1.44 
  -3  -3  15    9.54    1.26 
   4   3 -16   -0.35    1.12 
  -4  -3  16    1.06    0.93 
   5   3 -17    3.75    1.41 
  -5  -3  17    5.12    1.12 
   6   3 -18    1.36    1.34 
  -6  -3  18    2.98    1.17 
 -13   4   0    0.52    0.81 
  13  -4   0    0.32    1.43 
 -12   4  -1    3.96    0.96 
  12  -4   1    4.79    1.57 
 -11   4  -2   -0.47    0.67 
  11  -4   2    2.34    1.33 
 -10   4  -3    3.33    0.86 
  10  -4   3    3.32    1.34 
  -9   4  -4   29.01    1.54 
   9  -4   4   27.07    2.05 
  -8   4  -5    2.15    0.71 
   8  -4   5    3.74    1.13 
  -7   4  -6    2.89    0.83 
   7  -4   6    4.61    1.17 
  -6   4  -7    2.92    0.80 
  -6   4  -7    1.58    0.57 
   6  -4   7    2.68    0.98 
  -5   4  -8   31.54    1.52 
  -5   4  -8   33.70    1.40 
   5  -4   8   35.23    1.55 
  -4   4  -9   12.85    1.01 
  -4   4  -9   15.69    1.25 
   4  -4   9   15.76    1.19 
  -3   4 -10    1.98    1.01 
  -3   4 -10    2.10    0.69 
   3  -4  10    2.80    0.76 
  -2   4 -11   13.03    1.01 
  -2   4 -11   14.16    1.41 
   2  -4  11   15.69    1.21 
  -1   4 -12    6.68    1.25 
  -1   4 -12    8.38    0.88 
   1  -4  12    7.17    0.96 
   0   4 -13   -0.71    0.56 
   0   4 -13    1.36    1.11 
   0  -4  13    1.60    0.69 
   1   4 -14   24.24    1.92 
   1   4 -14   24.12    1.10 
  -1  -4  14   22.36    1.49 
   2   4 -15   -0.62    1.05 
  -2  -4  15    0.39    0.80 
   3   4 -16    5.36    1.46 
  -3  -4  16    4.32    1.03 
   4   4 -17   -0.20    1.28 
  -4  -4  17   -0.36    0.80 
   5   4 -18    2.36    1.44 
  -5  -4  18    2.57    1.05 
   6   4 -19    0.13    1.42 
  -6  -4  19   -0.54    0.93 
 -13   5  -1    2.32    0.91 
 -12   5  -2    3.18    0.97 
 -11   5  -3    6.89    1.07 
 -10   5  -4    1.48    0.74 
  10  -5   4    2.06    1.19 
  -9   5  -5   12.08    1.16 
   9  -5   5   12.64    1.46 
  -8   5  -6    1.55    0.70 
   8  -5   6    1.42    0.99 
  -7   5  -7   41.25    1.66 
   7  -5   7   45.61    1.88 
  -6   5  -8    1.17    0.68 
  -6   5  -8    1.13    0.69 
   6  -5   8    0.34    0.81 
  -5   5  -9   24.31    1.70 
  -5   5  -9   22.69    1.34 
   5  -5   9   23.56    1.37 
  -4   5 -10   23.44    1.31 
  -4   5 -10   25.16    1.76 
   4  -5  10   26.71    1.39 
  -3   5 -11    1.19    0.68 
  -3   5 -11    2.00    1.10 
   3  -5  11    0.32    0.67 
  -2   5 -12    0.72    0.61 
  -2   5 -12    0.15    1.15 
   2  -5  12   -0.17    0.61 
  -1   5 -13   -0.31    1.16 
  -1   5 -13    0.26    0.59 
   1  -5  13    0.73    0.68 
   0   5 -14    1.69    0.57 
   0   5 -14    1.74    1.21 
   0  -5  14    1.17    0.75 
   1   5 -15    8.67    1.53 
  -1  -5  15    9.13    1.10 
   2   5 -16    2.76    1.34 
  -2  -5  16    3.09    0.90 
   3   5 -17    0.23    1.35 
  -3  -5  17    2.82    1.01 
   4   5 -18    0.83    1.35 
  -4  -5  18   -0.62    0.84 
   5   5 -19    7.81    1.96 
  -5  -5  19    7.23    1.38 
 -12   6  -3    3.86    1.01 
 -11   6  -4   -0.09    0.76 
 -10   6  -5    4.52    0.97 
  -9   6  -6    7.17    1.05 
  -8   6  -7    8.18    1.05 
  -7   6  -8    1.17    0.75 
   7  -6   8    0.33    0.75 
  -6   6  -9    0.60    0.64 
  -6   6  -9    1.22    0.78 
   6  -6   9    1.13    0.70 
  -5   6 -10    0.52    0.93 
  -5   6 -10    0.55    0.63 
   5  -6  10    0.29    0.64 
  -4   6 -11   -0.01    1.03 
  -4   6 -11    0.11    0.64 
   4  -6  11    0.34    0.60 
  -3   6 -12    2.79    0.73 
  -3   6 -12    2.75    1.19 
   3  -6  12    4.26    0.78 
  -2   6 -13   -0.54    1.17 
  -2   6 -13   -0.23    0.58 
   2  -6  13    0.38    0.58 
  -1   6 -14    0.30    1.24 
  -1   6 -14   -0.14    0.53 
   1  -6  14   -0.82    0.64 
   0   6 -15    1.93    1.26 
   0  -6  15    0.41    0.72 
   1   6 -16    7.23    1.62 
  -1  -6  16    3.40    0.97 
   2   6 -17    6.48    1.64 
  -2  -6  17    4.51    1.08 
   3   6 -18    3.58    1.69 
  -3  -6  18    1.94    0.96 
   4   6 -19    0.90    1.56 
  -4  -6  19    0.68    1.00 
 -12   7  -4    9.66    1.25 
 -11   7  -5    0.75    0.85 
 -10   7  -6    6.31    1.05 
  -9   7  -7    9.02    1.18 
  -8   7  -8   -1.15    0.61 
  -7   7  -9   11.41    1.10 
  -7   7  -9   12.45    1.24 
  -6   7 -10    2.73    0.78 
  -6   7 -10    1.78    0.90 
  -5   7 -11    1.77    1.00 
  -5   7 -11    3.55    0.77 
  -4   7 -12   11.77    1.49 
  -4   7 -12   10.70    1.04 
   4  -7  12   10.85    0.96 
  -3   7 -13    8.16    0.92 
  -3   7 -13    5.25    1.40 
   3  -7  13    7.70    0.88 
  -2   7 -14    0.07    0.57 
  -2   7 -14    0.73    1.26 
   2  -7  14    0.59    0.63 
  -1   7 -15    0.44    1.26 
   1  -7  15   -0.18    0.69 
   0   7 -16    1.02    1.52 
   0  -7  16    4.38    0.97 
   1   7 -17   11.11    1.99 
  -1  -7  17   11.36    1.27 
   2   7 -18    1.49    1.70 
  -2  -7  18    3.05    0.98 
   3   7 -19    1.12    1.65 
  -3  -7  19    0.50    0.96 
 -12   8  -5    0.66    0.81 
 -11   8  -6    5.07    1.11 
 -10   8  -7    2.96    0.98 
  -9   8  -8    2.22    0.84 
  -8   8  -9    0.03    0.68 
  -7   8 -10   10.20    1.19 
  -7   8 -10   11.25    1.23 
  -6   8 -11    9.77    1.30 
  -6   8 -11    7.85    1.07 
  -5   8 -12    4.75    0.91 
  -5   8 -12    5.22    1.28 
  -4   8 -13    2.14    0.75 
  -4   8 -13   -0.46    1.21 
  -3   8 -14    4.61    0.83 
  -3   8 -14    5.21    1.50 
  -2   8 -15    9.52    1.78 
  -2   8 -15    8.13    0.91 
  -1   8 -16    1.08    1.41 
   1  -8  16    1.00    0.74 
   0   8 -17   10.22    1.92 
   0  -8  17    7.93    1.12 
   1   8 -18    3.74    1.79 
  -1  -8  18    4.46    1.06 
   2   8 -19   -1.05    1.84 
  -2  -8  19    1.31    1.00 
 -11   9  -7    3.34    0.98 
 -10   9  -8    0.72    0.91 
  -9   9  -9    0.25    0.79 
  -8   9 -10    5.66    1.06 
  -7   9 -11    9.34    1.30 
  -7   9 -11    7.61    1.12 
  -6   9 -12   -0.36    0.70 
  -6   9 -12    0.11    1.00 
  -5   9 -13    2.57    1.30 
  -5   9 -13    1.89    0.77 
  -4   9 -14    6.43    1.58 
  -4   9 -14    6.81    0.94 
  -3   9 -15    5.98    1.66 
  -3   9 -15    2.43    0.74 
  -2   9 -16    0.96    1.44 
  -1   9 -17    3.58    1.79 
   0   9 -18    4.19    1.82 
 -10  10  -9    4.18    1.04 
  -9  10 -10   -0.29    0.73 
  -8  10 -11    3.01    0.96 
  -7  10 -12    2.24    0.86 
  -7  10 -12    1.51    1.12 
  -6  10 -13   -1.96    1.01 
  -6  10 -13    0.35    0.72 
  -5  10 -14    2.94    1.42 
  -5  10 -14    6.91    0.98 
  -4  10 -15    1.47    1.45 
  -4  10 -15    1.49    0.74 
  -3  10 -16    0.04    1.51 
  -2  10 -17   -1.22    1.68 
  -1  10 -18    0.67    1.88 
  -9  11 -11    6.31    1.20 
  -8  11 -12    2.39    0.95 
  -7  11 -13    1.46    0.81 
  -7  11 -13   -0.14    1.21 
  -6  11 -14   -1.13    1.30 
  -6  11 -14    1.95    0.85 
  -5  11 -15    2.92    1.54 
  -5  11 -15    1.92    0.77 
  -4  11 -16    3.57    1.73 
  -3  11 -17    0.80    1.75 
   0  14  -4    7.69    1.48 
  -1  14  -3    1.74    1.19 
  -2  14  -2    5.81    1.27 
  -3  14  -1    4.70    1.30 
  -4  14   0    7.74    1.43 
  -5  14   1    0.49    1.00 
  -6  14   2    6.29    1.41 
   2  13  -5    7.08    1.44 
   1  13  -4    9.96    1.52 
   0  13  -3   -0.09    0.90 
  -1  13  -2   -0.65    0.94 
  -2  13  -1    2.64    1.11 
  -3  13   0    1.06    1.00 
  -4  13   1   -0.46    0.89 
  -5  13   2    1.37    0.93 
  -6  13   3   21.59    1.88 
  -7  13   4   -1.03    0.82 
  -8  13   5    3.88    1.26 
   4  12  -6    2.76    1.62 
   4  12  -6    2.15    1.24 
   3  12  -5    0.40    1.10 
   3  12  -5    1.38    1.53 
   2  12  -4   -0.34    0.97 
   2  12  -4    0.35    1.25 
   1  12  -3   12.72    1.50 
   0  12  -2    1.53    1.02 
  -1  12  -1   -1.05    0.89 
  -2  12   0    5.81    1.20 
  -3  12   1    1.32    1.02 
  -4  12   2    0.87    0.95 
  -5  12   3    2.64    1.02 
  -6  12   4    3.79    1.17 
  -7  12   5    0.90    0.96 
  -8  12   6   -0.73    0.88 
   5  11  -6    0.99    1.47 
   4  11  -5    0.16    1.37 
   4  11  -5   -0.76    1.02 
   3  11  -4    2.31    1.04 
   3  11  -4    3.13    1.45 
   2  11  -3   -0.36    0.90 
   2  11  -3    0.43    1.15 
   1  11  -2   -0.10    0.86 
   1  11  -2   -0.56    1.05 
   0  11  -1    1.06    0.92 
   0  11  -1    0.57    1.04 
  -1  11   0    0.40    0.94 
  -1  11   0    2.43    0.97 
  -2  11   1    0.84    0.81 
  -2  11   1    0.09    0.81 
  -3  11   2    1.72    0.93 
  -4  11   3    2.69    1.01 
  -5  11   4    2.19    0.92 
  -6  11   5    0.18    0.78 
  -7  11   6    1.85    1.00 
  -8  11   7    3.33    1.14 
  -9  11   8   -0.89    0.85 
   6  10  -6    4.64    1.73 
   5  10  -5    1.00    1.43 
   4  10  -4   -1.99    1.12 
   4  10  -4   -1.17    0.93 
   3  10  -3    1.47    0.95 
   3  10  -3    1.23    1.32 
   2  10  -2    0.73    0.88 
   2  10  -2    0.32    1.13 
   1  10  -1   -0.77    0.76 
   1  10  -1   -1.26    1.05 
   0  10   0    7.78    1.26 
   0  10   0    7.48    1.11 
  -1  10   1   17.06    1.42 
  -1  10   1   14.61    1.38 
  -2  10   2   -0.13    0.69 
  -2  10   2   -0.69    0.78 
  -3  10   3    0.70    0.72 
  -3  10   3   -0.11    0.71 
  -4  10   4    2.05    0.78 
  -4  10   4    2.21    0.91 
  -5  10   5    0.71    0.84 
  -5  10   5    0.54    0.66 
  -6  10   6    0.92    0.81 
  -7  10   7    3.05    1.04 
  -8  10   8   -0.64    0.80 
  -9  10   9    0.74    0.92 
   7   9  -6    1.92    1.65 
   6   9  -5   -0.26    1.44 
   5   9  -4    1.84    1.42 
   4   9  -3    1.83    1.39 
   4   9  -3    1.15    0.94 
   3   9  -2    0.72    1.26 
   3   9  -2   -0.71    0.80 
   2   9  -1    3.01    1.22 
   2   9  -1    3.56    0.91 
   1   9   0   -0.33    1.00 
   1   9   0   -0.76    0.69 
   0   9   1    3.77    0.91 
   0   9   1    3.06    1.04 
  -1   9   2   10.83    1.19 
  -1   9   2   10.41    1.21 
  -2   9   3    5.44    1.01 
  -2   9   3    6.02    1.01 
  -3   9   4    5.27    0.93 
  -3   9   4    5.61    0.97 
  -4   9   5   10.33    1.08 
  -4   9   5    9.65    1.20 
  -5   9   6    2.29    0.89 
  -5   9   6    2.17    0.78 
  -6   9   7    0.83    0.67 
  -6   9   7    0.93    0.86 
  -7   9   8    0.04    0.69 
  -7   9   8    1.58    0.89 
  -8   9   9    0.55    0.73 
  -8   9   9    0.27    0.85 
  -9   9  10    0.60    0.92 
   8   8  -6    1.06    1.53 
   7   8  -5    0.58    1.48 
   6   8  -4    3.07    1.52 
   5   8  -3    3.05    1.36 
   4   8  -2    0.36    1.30 
   4   8  -2   -0.02    0.77 
   3   8  -1    1.74    0.81 
   3   8  -1    2.81    1.32 
   2   8   0    0.60    1.12 
   2   8   0    1.45    0.79 
   1   8   1    1.22    1.11 
   1   8   1   -0.04    0.70 
   0   8   2   11.79    1.12 
   0   8   2   14.18    1.40 
  -1   8   3    2.84    0.93 
  -1   8   3    3.12    0.83 
  -2   8   4    3.72    0.83 
  -2   8   4    4.09    0.95 
  -3   8   5    4.90    0.93 
  -3   8   5    5.74    0.95 
  -4   8   6   -0.69    0.68 
  -4   8   6    0.26    0.73 
  -5   8   7   10.82    1.27 
  -5   8   7   12.48    1.16 
  -6   8   8   -0.37    0.62 
  -6   8   8    0.51    0.77 
  -7   8   9    0.92    0.84 
  -7   8   9    0.92    0.75 
  -8   8  10    4.87    1.12 
  -8   8  10    2.73    0.85 
  -9   8  11    1.61    0.88 
  -9   8  11    0.44    0.97 
   9   7  -6    0.23    1.70 
   8   7  -5    0.69    1.46 
   7   7  -4    1.43    1.55 
   6   7  -3    6.38    1.65 
  -5  -7   2    1.99    0.68 
   5   7  -2    2.80    1.42 
   4   7  -1    2.31    0.75 
   4   7  -1    1.49    1.21 
   3   7   0    5.87    1.33 
   3   7   0    3.41    0.82 
   2   7   1    1.83    1.21 
   2   7   1    1.37    0.69 
   1   7   2    2.11    1.10 
   1   7   2    0.01    0.61 
   0   7   3   -0.01    0.88 
   0   7   3    1.11    0.65 
  -1   7   4    1.41    0.70 
  -1   7   4    1.21    0.87 
  -2   7   5    1.79    0.74 
  -2   7   5    1.51    0.78 
  -3   7   6    0.60    0.66 
  -3   7   6    0.94    0.76 
  -4   7   7    4.29    0.88 
  -4   7   7    3.58    0.89 
  -5   7   8    2.22    0.75 
  -5   7   8    2.94    0.85 
  -6   7   9    2.00    0.85 
  -6   7   9    0.80    0.72 
  -7   7  10    1.08    0.84 
  -7   7  10    1.88    0.81 
  -8   7  11    0.54    0.76 
  -8   7  11   -0.35    0.84 
  -9   7  12    4.82    1.09 
  -9   7  12    3.97    1.17 
   9   6  -5    1.27    1.52 
   8   6  -4    9.73    1.97 
   7   6  -3    4.89    1.56 
  -6  -6   2   -0.51    0.56 
   6   6  -2   -1.13    1.29 
  -5  -6   1    2.08    0.68 
   5   6  -1    1.83    1.25 
   4   6   0    3.27    0.71 
   4   6   0    3.89    1.47 
   3   6   1    4.70    0.73 
   3   6   1    4.75    1.34 
   2   6   2    2.50    1.17 
   2   6   2    1.58    0.61 
   1   6   3    2.54    0.62 
   1   6   3    2.06    0.95 
   0   6   4    1.22    0.89 
   0   6   4    1.47    0.62 
  -1   6   5   -0.13    0.77 
  -1   6   5   -0.03    0.57 
  -2   6   6    0.35    0.72 
  -2   6   6    0.06    0.62 
  -3   6   7    9.94    1.04 
  -3   6   7    9.60    1.09 
  -4   6   8    1.68    0.80 
  -4   6   8    1.14    0.75 
  -5   6   9    0.03    0.62 
  -5   6   9    0.99    0.78 
  -6   6  10    0.44    0.75 
  -6   6  10    0.12    0.69 
  -7   6  11    1.50    0.81 
  -7   6  11    3.72    0.95 
  -8   6  12    1.10    0.87 
  -8   6  12    0.98    0.86 
  -9   6  13    1.81    0.90 
  -9   6  13   -0.40    0.91 
  10   5  -5    4.60    1.72 
   9   5  -4    7.91    1.84 
   8   5  -3    5.48    1.69 
  -7  -5   2    0.03    0.57 
   7   5  -2    1.11    1.31 
  -6  -5   1    1.58    0.63 
   6   5  -1    1.20    1.33 
  -5  -5   0    1.11    0.67 
   5   5   0    1.06    1.40 
   4   5   1   -0.18    1.15 
   4   5   1   -0.04    0.51 
   3   5   2    2.81    0.57 
   3   5   2    3.03    1.12 
   2   5   3    7.32    1.29 
   2   5   3    6.58    0.70 
   1   5   4   98.30    1.97 
   1   5   4   96.83    2.56 
   0   5   5   10.04    0.83 
   0   5   5    8.83    1.05 
  -1   5   6   65.93    1.85 
  -1   5   6   70.15    2.08 
  -2   5   7   23.22    1.37 
  -2   5   7   23.16    1.37 
  -3   5   8    4.55    0.82 
  -3   5   8    2.12    0.85 
  -4   5   9   -0.01    0.66 
  -4   5   9    0.99    0.77 
  -5   5  10    1.54    0.79 
  -5   5  10    0.51    0.73 
  -6   5  11    8.56    1.16 
  -6   5  11    7.75    1.16 
  -7   5  12    1.03    0.86 
  -7   5  12    1.77    0.87 
  -8   5  13   -0.14    0.91 
  -8   5  13   -0.54    0.79 
  -9   5  14    1.04    0.89 
  10   4  -4   -1.07    1.51 
   9   4  -3    1.39    1.41 
  -8  -4   2    7.42    0.84 
   8   4  -2    8.79    1.81 
  -7  -4   1    6.81    0.80 
   7   4  -1    8.44    1.63 
  -6  -4   0    0.49    0.63 
   6   4   0   -1.08    1.18 
  -5  -4  -1   12.00    1.00 
   5   4   1   12.06    1.65 
   4   4   2    3.29    0.46 
   4   4   2    4.33    1.22 
   3   4   3    0.00    0.96 
   3   4   3    0.51    0.40 
   2   4   4   40.67    1.15 
   2   4   4   40.39    1.88 
   1   4   5  119.22    2.73 
   1   4   5  119.64    2.09 
   0   4   6   27.87    1.64 
   0   4   6   30.35    1.19 
  -1   4   7    0.29    0.74 
  -1   4   7    0.42    0.52 
  -2   4   8   26.68    1.56 
  -2   4   8   23.48    1.27 
  -3   4   9   17.92    1.35 
  -3   4   9   17.22    1.36 
  -4   4  10    0.75    0.70 
  -4   4  10    0.16    0.75 
  -5   4  11   13.48    1.26 
  -5   4  11   10.23    1.15 
  -6   4  12    9.61    1.22 
  -6   4  12    6.98    1.12 
  -7   4  13    4.33    1.06 
  -8   4  14    0.36    0.87 
  -9   4  15    3.49    1.09 
  11   3  -4   -0.21    1.69 
  10   3  -3    3.44    1.68 
   9   3  -2    0.13    1.51 
  -8  -3   1   11.63    0.95 
   8   3  -1   14.17    1.86 
  -7  -3   0    6.84    0.82 
   7   3   0    5.55    1.48 
  -6  -3  -1    7.89    0.87 
   6   3   1    8.35    1.60 
  -5  -3  -2    6.84    0.85 
   5   3   2    5.46    1.46 
  -4  -3  -3    1.80    0.71 
   4   3   3    3.74    0.35 
   4   3   3    3.40    1.17 
   3   3   4    2.20    0.38 
   3   3   4    2.49    1.11 
   2   3   5   11.09    1.23 
   2   3   5   10.44    0.69 
   1   3   6   26.68    1.61 
   1   3   6   27.02    0.99 
   0   3   7    0.43    0.46 
   0   3   7    0.55    0.70 
  -1   3   8   15.47    1.08 
  -1   3   8   17.73    1.30 
  -2   3   9    3.55    0.82 
  -2   3   9    3.16    0.73 
  -3   3  10   20.01    1.33 
  -3   3  10   16.72    1.31 
  -4   3  11    0.43    0.78 
  -4   3  11    1.64    0.78 
  -5   3  12    4.74    0.99 
  -6   3  13    0.90    0.77 
  -7   3  14    0.17    0.86 
  -8   3  15    0.35    0.90 
  -9   3  16    0.99    1.04 
  11   2  -3    4.27    1.68 
  10   2  -2    6.83    1.82 
  -9  -2   1   28.80    1.32 
  -8  -2   0    1.95    0.66 
   8   2   0    2.56    1.41 
  -7  -2  -1    5.98    0.81 
   7   2   1    5.09    1.54 
  -6  -2  -2   10.11    0.94 
   6   2   2   10.74    1.69 
  -5  -2  -3    7.64    0.89 
   5   2   3    9.36    1.49 
  -4  -2  -4    2.91    0.71 
   4   2   4    2.34    1.02 
   3   2   5   35.11    1.95 
   3   2   5   33.64    0.83 
   2   2   6   15.46    0.76 
   2   2   6   14.48    1.27 
   1   2   7   14.71    1.23 
   1   2   7   12.74    0.85 
   0   2   8    5.60    0.68 
   0   2   8    6.70    0.93 
  -1   2   9    9.80    1.04 
  -1   2   9   10.87    0.95 
  -2   2  10    0.21    0.66 
  -3   2  11   19.67    1.40 
  -4   2  12    7.98    1.10 
  -5   2  13    5.04    1.05 
  -6   2  14    8.84    1.29 
  -7   2  15    1.17    0.86 
  -8   2  16    5.79    1.24 
  12   1  -3    0.03    1.71 
  11   1  -2    3.12    1.70 
 -10  -1   1   14.12    1.13 
  10   1  -1   12.67    1.98 
  -9  -1   0   18.77    1.21 
   9   1   0   15.34    2.01 
  -8  -1  -1   -0.62    0.56 
   8   1   1    1.08    1.25 
  -7  -1  -2    5.32    0.80 
   7   1   2    7.87    1.54 
  -6  -1  -3    7.57    0.88 
   6   1   3    8.43    1.47 
  -5  -1  -4    8.65    0.89 
   5   1   4    3.99    1.16 
  -4  -1  -5    2.57    0.69 
   4   1   5    2.05    1.07 
  -3  -1  -6   25.99    1.17 
   3   1   6   28.38    1.64 
   2   1   7   18.82    1.48 
   1   1   8    0.08    0.66 
   0   1   9   22.03    1.33 
  -1   1  10   11.56    1.11 
  -2   1  11   18.85    1.49 
  -3   1  12    0.65    0.83 
  -4   1  13    7.84    1.08 
  -5   1  14    1.85    0.91 
  -6   1  15    0.94    0.90 
  -7   1  16    3.02    1.01 
  -8   1  17    2.14    1.13 
  12   0  -2    1.21    1.51 
 -11   0   1   11.04    1.13 
  11   0  -1   15.54    2.10 
 -10   0   0    2.43    0.74 
  10   0   0    4.47    1.57 
  -9   0  -1    0.05    0.59 
   9   0   1    1.01    1.37 
  -8   0  -2   -0.06    0.58 
   8   0   2    1.24    1.34 
  -7   0  -3    8.81    0.92 
   7   0   3   10.34    1.56 
  -6   0  -4    1.41    0.66 
   6   0   4    0.49    1.20 
  -5   0  -5    1.41    0.66 
   5   0   5    0.75    1.13 
  -4   0  -6   29.63    1.25 
  -4   0  -6   29.41    0.86 
   4   0   6   30.81    1.89 
  -3   0  -7   60.55    1.70 
   3   0   7   61.20    1.98 
  -2   0  -8    1.55    0.61 
   2   0   8    1.47    0.74 
   1   0   9    1.91    0.72 
   0   0  10   29.25    1.61 
  -1   0  11   25.14    1.55 
  -2   0  12    2.24    0.82 
  -3   0  13    1.97    0.86 
  -4   0  14   12.59    1.39 
  -5   0  15    3.09    1.02 
  -6   0  16    0.08    0.89 
  -7   0  17    3.52    1.10 
 -12   1   1    4.08    0.92 
  12  -1  -1    4.21    1.74 
 -11   1   0    5.89    0.97 
  11  -1   0    6.04    1.68 
 -10   1  -1   -0.19    0.62 
  10  -1   1    1.41    1.45 
  -9   1  -2    0.16    0.61 
   9  -1   2    0.00    1.28 
  -8   1  -3    0.96    0.66 
   8  -1   3   -0.10    1.16 
  -7   1  -4    2.45    0.70 
   7  -1   4    3.01    1.36 
  -6   1  -5    1.18    0.62 
   6  -1   5    2.94    1.23 
  -5   1  -6    2.42    0.68 
   5  -1   6    2.07    1.04 
  -4   1  -7   14.87    0.99 
  -4   1  -7   13.48    1.05 
   4  -1   7   15.55    1.30 
  -3   1  -8    3.93    0.76 
  -3   1  -8    4.28    0.65 
   3  -1   8    3.14    0.90 
  -2   1  -9    0.53    0.63 
  -2   1  -9    0.41    0.59 
   2  -1   9    0.36    0.73 
  -1   1 -10    5.29    0.75 
   1  -1  10    4.29    0.88 
   0   1 -11   17.83    1.11 
   0  -1  11   17.62    1.31 
  -1  -1  12    6.66    1.03 
  -2  -1  13    0.09    0.74 
  -3  -1  14   -0.27    0.67 
  -4  -1  15   -0.09    0.81 
  -5  -1  16    0.93    0.89 
  -6  -1  17    5.43    1.14 
  -7  -1  18    6.63    1.40 
 -12   2   0    1.01    0.77 
  12  -2   0    1.97    1.55 
 -11   2  -1   10.25    1.13 
  11  -2   1    8.48    1.75 
 -10   2  -2    0.17    0.63 
  10  -2   2   -1.65    1.24 
  -9   2  -3   15.85    1.24 
   9  -2   3   14.17    1.76 
  -8   2  -4    6.94    0.95 
   8  -2   4    8.79    1.47 
  -7   2  -5    7.79    0.96 
   7  -2   5    7.24    1.37 
  -6   2  -6    1.10    0.69 
   6  -2   6    1.52    1.11 
  -5   2  -7   28.19    1.28 
  -5   2  -7   27.90    0.98 
   5  -2   7   27.86    1.80 
  -4   2  -8    4.33    0.77 
  -4   2  -8    5.28    0.82 
   4  -2   8    4.34    0.96 
  -3   2  -9    0.77    0.71 
  -3   2  -9    1.62    0.63 
   3  -2   9    1.19    0.80 
  -2   2 -10    1.12    0.69 
  -2   2 -10    0.87    0.77 
   2  -2  10    2.70    0.77 
  -1   2 -11    1.98    0.71 
  -1   2 -11    2.93    0.88 
   1  -2  11    3.19    0.85 
   0   2 -12    9.21    0.92 
   0  -2  12   10.87    1.16 
   1   2 -13    0.92    0.64 
  -1  -2  13    1.20    0.77 
   2   2 -14   32.81    1.33 
  -2  -2  14   35.71    1.79 
  -3  -2  15    1.05    0.79 
  -4  -2  16    1.72    0.94 
  -5  -2  17   -0.62    0.87 
  -6  -2  18    6.71    1.28 
 -12   3  -1    0.52    0.80 
  12  -3   1    0.71    1.43 
 -11   3  -2    4.56    0.94 
  11  -3   2    8.09    1.64 
 -10   3  -3   -0.60    0.68 
  10  -3   3   -0.12    1.22 
  -9   3  -4    1.04    0.67 
   9  -3   4    0.90    1.22 
  -8   3  -5    0.67    0.70 
   8  -3   5    1.36    1.18 
  -7   3  -6    7.38    0.96 
   7  -3   6    8.30    1.36 
  -6   3  -7    0.06    0.66 
   6  -3   7    0.27    0.98 
  -5   3  -8   -0.63    0.61 
  -5   3  -8    0.48    0.61 
   5  -3   8    2.30    0.93 
  -4   3  -9    9.95    0.99 
  -4   3  -9    6.89    0.96 
   4  -3   9    9.27    1.11 
  -3   3 -10   13.01    1.01 
  -3   3 -10   14.58    1.24 
   3  -3  10   13.87    1.18 
  -2   3 -11    2.35    0.72 
  -2   3 -11    1.84    0.90 
   2  -3  11    1.67    0.78 
  -1   3 -12    5.65    1.17 
  -1   3 -12    4.05    0.76 
   1  -3  12    7.00    1.02 
   0   3 -13   22.37    1.21 
   0   3 -13   24.22    1.92 
   0  -3  13   19.13    1.44 
   1   3 -14    1.58    0.64 
   1   3 -14    2.01    1.11 
  -1  -3  14    1.06    0.79 
   2   3 -15   54.43    2.56 
   2   3 -15   49.43    1.48 
  -2  -3  15   51.16    2.12 
   3   3 -16    2.98    1.27 
  -3  -3  16    1.86    0.96 
   4   3 -17    0.34    1.10 
  -4  -3  17   -0.23    0.90 
   5   3 -18    2.49    1.32 
  -5  -3  18    3.72    1.17 
   6   3 -19    9.08    1.76 
  -6  -3  19    9.12    1.48 
 -12   4  -2    0.03    0.76 
  12  -4   2    0.81    1.38 
 -11   4  -3    2.43    0.86 
  11  -4   3    1.71    1.29 
 -10   4  -4    2.54    0.85 
  10  -4   4    0.65    1.19 
  -9   4  -5   -0.14    0.63 
   9  -4   5    0.75    1.09 
  -8   4  -6    2.80    0.82 
   8  -4   6    3.47    1.18 
  -7   4  -7    4.53    0.88 
   7  -4   7    4.39    1.15 
  -6   4  -8    8.15    0.96 
   6  -4   8    8.00    1.15 
  -5   4  -9   -0.70    0.65 
  -5   4  -9   -0.58    0.77 
   5  -4   9    0.58    0.85 
  -4   4 -10    1.00    0.64 
  -4   4 -10    0.22    0.92 
   4  -4  10    0.76    0.81 
  -3   4 -11    0.81    1.03 
  -3   4 -11    0.07    0.66 
   3  -4  11    0.15    0.71 
  -2   4 -12    0.58    0.67 
  -2   4 -12    0.83    1.06 
   2  -4  12    0.78    0.74 
  -1   4 -13    5.26    1.25 
  -1   4 -13    5.19    0.80 
   1  -4  13    2.52    0.84 
   0   4 -14   22.18    1.80 
   0   4 -14   26.40    1.22 
   0  -4  14   21.75    1.43 
   1   4 -15   16.17    1.74 
   1   4 -15   17.91    1.06 
  -1  -4  15   18.05    1.48 
   2   4 -16    2.74    1.24 
  -2  -4  16    3.40    1.00 
   3   4 -17    5.25    1.42 
  -3  -4  17    5.73    1.19 
   4   4 -18    1.49    1.28 
  -4  -4  18    0.46    0.95 
   5   4 -19    2.01    1.57 
  -5  -4  19    1.14    1.06 
 -12   5  -3    0.88    0.83 
 -11   5  -4    0.77    0.78 
 -10   5  -5   -0.76    0.71 
  10  -5   5   -1.07    1.11 
  -9   5  -6    1.47    0.80 
   9  -5   6    0.32    1.06 
  -8   5  -7   -0.68    0.58 
   8  -5   7   -0.25    0.94 
  -7   5  -8    0.67    0.65 
   7  -5   8   -0.81    0.84 
  -6   5  -9   23.83    1.42 
  -6   5  -9   22.55    1.34 
   6  -5   9   22.59    1.51 
  -5   5 -10    1.13    0.89 
  -5   5 -10    2.20    0.78 
   5  -5  10    0.43    0.74 
  -4   5 -11    0.40    0.67 
  -4   5 -11   -1.23    0.91 
   4  -5  11   -0.17    0.70 
  -3   5 -12    0.32    1.03 
  -3   5 -12    0.69    0.64 
   3  -5  12    0.48    0.71 
  -2   5 -13   11.19    1.50 
  -2   5 -13   14.63    1.07 
   2  -5  13   11.23    1.12 
  -1   5 -14   11.23    0.95 
  -1   5 -14    9.77    1.46 
   1  -5  14    9.63    1.08 
   0   5 -15    4.75    0.71 
   0   5 -15    2.45    1.20 
   0  -5  15    4.76    0.96 
   1   5 -16    4.48    1.38 
  -1  -5  16    4.78    1.01 
   2   5 -17    1.87    1.43 
  -2  -5  17    0.39    0.89 
   3   5 -18   -1.01    1.32 
  -3  -5  18    0.23    0.87 
   4   5 -19   -0.71    1.38 
  -4  -5  19   -0.39    0.96 
 -12   6  -4   -0.49    0.77 
 -11   6  -5    0.85    0.74 
 -10   6  -6    0.25    0.77 
  -9   6  -7    0.33    0.76 
  -8   6  -8   -0.52    0.65 
  -7   6  -9    0.97    0.70 
  -6   6 -10    4.26    0.88 
  -6   6 -10    3.86    0.90 
   6  -6  10    4.37    0.87 
  -5   6 -11    0.14    0.88 
  -5   6 -11   -1.07    0.60 
   5  -6  11    0.44    0.65 
  -4   6 -12   21.74    1.31 
  -4   6 -12   21.69    1.71 
   4  -6  12   22.21    1.32 
  -3   6 -13    0.93    0.63 
  -3   6 -13   -0.33    1.05 
   3  -6  13    0.29    0.63 
  -2   6 -14   -0.98    1.04 
  -2   6 -14    0.61    0.62 
   2  -6  14    0.75    0.68 
  -1   6 -15    0.64    1.36 
  -1   6 -15    0.19    0.60 
   1  -6  15    0.96    0.77 
   0   6 -16    2.70    1.35 
   0  -6  16    0.32    0.74 
   1   6 -17    1.32    1.41 
  -1  -6  17   -0.27    0.87 
   2   6 -18    1.84    1.60 
  -2  -6  18    1.54    0.90 
   3   6 -19    3.34    1.77 
  -3  -6  19    2.26    1.10 
 -12   7  -5   -0.53    0.83 
 -11   7  -6   -0.96    0.75 
 -10   7  -7   -0.35    0.71 
  -9   7  -8   -0.02    0.70 
  -8   7  -9    5.97    1.05 
  -7   7 -10    2.35    0.83 
  -6   7 -11    0.13    0.90 
  -6   7 -11    0.64    0.77 
  -5   7 -12    3.00    0.78 
  -5   7 -12    1.40    1.12 
  -4   7 -13    1.08    0.69 
  -4   7 -13    3.01    1.25 
  -3   7 -14    0.16    1.19 
  -3   7 -14    0.03    0.61 
   3  -7  14    0.19    0.63 
  -2   7 -15    0.79    0.66 
  -2   7 -15    0.86    1.34 
   2  -7  15    0.29    0.72 
  -1   7 -16    0.81    1.44 
   1  -7  16    1.62    0.78 
   0   7 -17   -0.35    1.39 
   0  -7  17    0.66    0.79 
   1   7 -18   -0.16    1.61 
  -1  -7  18    0.14    0.81 
   2   7 -19   -0.91    1.61 
  -2  -7  19   -0.22    0.83 
 -11   8  -7    2.76    0.98 
 -10   8  -8    4.41    1.01 
  -9   8  -9    4.14    1.02 
  -8   8 -10    0.36    0.79 
  -7   8 -11    3.64    0.95 
  -6   8 -12    0.77    1.00 
  -6   8 -12    1.58    0.76 
  -5   8 -13    1.93    0.77 
  -5   8 -13    0.76    1.12 
  -4   8 -14    1.43    0.74 
  -4   8 -14   -1.37    1.25 
  -3   8 -15    0.33    1.34 
  -3   8 -15    2.73    0.78 
  -2   8 -16    1.06    1.49 
  -1   8 -17   -1.13    1.48 
   0   8 -18    2.59    1.83 
   0  -8  18    4.10    1.02 
   1   8 -19    6.78    2.04 
  -1  -8  19    5.40    1.11 
 -11   9  -8    0.62    0.94 
 -10   9  -9    4.67    1.14 
  -9   9 -10    3.36    1.02 
  -8   9 -11    0.74    0.85 
  -7   9 -12    0.87    0.81 
  -6   9 -13    0.80    0.79 
  -6   9 -13   -0.07    1.06 
  -5   9 -14   -0.28    1.20 
  -5   9 -14   -0.72    0.74 
  -4   9 -15    2.23    1.45 
  -4   9 -15    2.78    0.82 
  -3   9 -16   -0.60    1.42 
  -2   9 -17    1.04    1.51 
  -1   9 -18    2.45    1.80 
 -10  10 -10    2.27    1.01 
  -9  10 -11    0.56    0.91 
  -8  10 -12    2.45    0.96 
  -7  10 -13    3.40    0.98 
  -6  10 -14    1.47    1.34 
  -6  10 -14    1.32    0.86 
  -5  10 -15    0.17    0.75 
  -5  10 -15    0.23    1.37 
  -4  10 -16    0.59    1.48 
  -3  10 -17   -0.12    1.64 
  -2  10 -18   -0.01    1.67 
  -7  11 -14    7.26    1.14 
  -6  11 -15   -2.42    1.29 
  -6  11 -15   -0.32    0.73 
   0  14  -3   -0.74    1.04 
  -1  14  -2   -0.68    0.92 
  -2  14  -1    0.19    0.95 
  -3  14   0    0.60    1.09 
  -4  14   1    0.97    1.06 
  -5  14   2   -0.60    1.02 
  -6  14   3    3.03    1.13 
   2  13  -4    4.93    1.30 
   1  13  -3    3.33    1.19 
   0  13  -2    1.33    1.03 
  -1  13  -1    2.97    1.05 
  -2  13   0    0.74    1.00 
  -3  13   1    7.11    1.30 
  -4  13   2    0.57    0.97 
  -5  13   3    4.93    1.20 
  -6  13   4    4.13    1.25 
  -7  13   5    3.23    1.16 
   3  12  -4    3.85    1.23 
   3  12  -4    4.38    1.64 
   2  12  -3    5.53    1.25 
   2  12  -3    4.45    1.49 
   1  12  -2    1.18    1.27 
   1  12  -2    2.47    1.05 
   0  12  -1    1.33    0.97 
  -1  12   0   -1.60    0.80 
  -2  12   1    3.28    1.09 
  -3  12   2    3.98    1.08 
  -4  12   3   -0.22    0.80 
  -5  12   4    4.47    1.08 
  -6  12   5    0.32    0.87 
  -7  12   6    0.34    0.92 
  -8  12   7    0.34    1.01 
   5  11  -5    2.36    1.68 
   4  11  -4    0.92    1.44 
   3  11  -3    1.74    1.03 
   3  11  -3    0.59    1.38 
   2  11  -2   10.59    1.60 
   2  11  -2    8.20    1.24 
   1  11  -1    5.80    1.14 
   1  11  -1    5.78    1.40 
   0  11   0    0.68    1.09 
   0  11   0    0.69    0.88 
  -1  11   1    3.74    1.05 
  -1  11   1    3.73    1.08 
  -2  11   2    2.26    0.95 
  -2  11   2    2.29    0.98 
  -3  11   3    0.98    0.87 
  -4  11   4    1.66    0.88 
  -5  11   5    1.01    0.93 
  -6  11   6    5.76    1.23 
  -7  11   7    0.98    1.00 
  -8  11   8    4.56    1.32 
   6  10  -5    1.35    1.66 
   5  10  -4    5.67    1.70 
   4  10  -3    0.10    1.31 
   3  10  -2    2.85    1.00 
   3  10  -2    0.94    1.32 
   2  10  -1   15.78    1.45 
   2  10  -1   15.85    1.76 
   1  10   0    7.54    1.39 
   1  10   0    8.57    1.15 
   0  10   1    2.49    1.07 
   0  10   1    3.00    0.94 
  -1  10   2   -1.77    0.84 
  -1  10   2   -0.82    0.73 
  -2  10   3    5.81    1.00 
  -2  10   3    4.67    0.99 
  -3  10   4    1.70    0.89 
  -3  10   4    1.97    0.81 
  -4  10   5    0.06    0.84 
  -4  10   5   -0.05    0.68 
  -5  10   6    2.63    0.83 
  -5  10   6    2.02    0.95 
  -6  10   7    2.77    0.96 
  -7  10   8    4.51    1.13 
  -8  10   9    7.00    1.35 
  -9  10  10    2.01    1.14 
   7   9  -5    8.56    1.88 
   6   9  -4    2.11    1.58 
   5   9  -3    1.48    1.47 
   4   9  -2    4.45    1.56 
   4   9  -2    3.63    0.97 
   3   9  -1   16.00    1.75 
   3   9  -1   18.38    1.40 
   2   9   0    5.76    1.37 
   2   9   0    6.88    1.04 
   1   9   1   -0.50    1.01 
   1   9   1    0.63    0.72 
   0   9   2    2.58    0.84 
   0   9   2    1.63    0.99 
  -1   9   3    7.17    1.02 
  -1   9   3    6.32    1.09 
  -2   9   4    2.12    0.87 
  -2   9   4    3.44    0.85 
  -3   9   5   15.08    1.34 
  -3   9   5   15.30    1.30 
  -4   9   6    8.81    1.19 
  -4   9   6    9.08    1.08 
  -5   9   7    4.85    0.95 
  -5   9   7    4.04    0.96 
  -6   9   8    0.06    0.73 
  -6   9   8   -1.03    0.72 
  -7   9   9    9.73    1.34 
  -7   9   9    8.20    1.15 
  -8   9  10   20.66    1.55 
  -8   9  10   20.21    1.89 
  -9   9  11    7.40    1.38 
   8   8  -5    3.70    1.86 
   7   8  -4   11.78    2.02 
   6   8  -3    2.83    1.53 
   5   8  -2    0.50    1.43 
   4   8  -1    3.56    1.40 
   4   8  -1    4.34    0.91 
   3   8   0   -0.05    0.70 
   3   8   0    0.12    1.20 
   2   8   1    3.83    0.83 
   2   8   1    4.28    1.18 
   1   8   2   -0.60    0.64 
   1   8   2    1.48    1.08 
   0   8   3   17.89    1.35 
   0   8   3   19.36    1.56 
  -1   8   4    1.31    0.76 
  -1   8   4    2.02    0.95 
  -2   8   5    0.07    0.71 
  -2   8   5    1.64    0.83 
  -3   8   6   10.57    1.15 
  -3   8   6   12.20    1.21 
  -4   8   7   16.79    1.39 
  -4   8   7   20.12    1.60 
  -5   8   8    9.39    1.25 
  -5   8   8    9.88    1.13 
  -6   8   9    1.52    0.92 
  -6   8   9    0.52    0.72 
  -7   8  10    7.07    1.12 
  -7   8  10    8.40    1.28 
  -8   8  11   16.26    1.51 
  -8   8  11   16.99    1.74 
  -9   8  12    4.33    1.22 
  -9   8  12    7.06    1.20 
   8   7  -4    5.29    1.66 
   7   7  -3    2.97    1.47 
   6   7  -2   -1.51    1.36 
  -5  -7   1    6.33    0.89 
   5   7  -1    7.10    1.53 
   4   7   0   16.16    1.14 
   4   7   0   13.55    1.66 
   3   7   1    1.00    1.10 
   3   7   1   -0.52    0.60 
   2   7   2   -0.30    1.14 
   2   7   2    0.47    0.61 
   1   7   3   12.15    1.43 
   1   7   3   12.32    1.03 
   0   7   4   10.20    1.30 
   0   7   4   10.33    1.02 
  -1   7   5    0.03    0.87 
  -1   7   5   -0.08    0.57 
  -2   7   6    2.00    0.77 
  -2   7   6    2.61    0.88 
  -3   7   7    9.85    1.10 
  -3   7   7   11.67    1.21 
  -4   7   8    4.34    0.91 
  -4   7   8    4.57    0.92 
  -5   7   9    0.71    0.75 
  -5   7   9    1.81    0.80 
  -6   7  10    1.53    0.79 
  -6   7  10    1.08    0.90 
  -7   7  11    8.38    1.32 
  -7   7  11    8.38    1.20 
  -8   7  12    1.24    0.85 
  -8   7  12    0.55    0.95 
  -9   7  13   -0.31    0.97 
  -9   7  13   -1.04    0.84 
   9   6  -4    2.96    1.75 
   8   6  -3    0.55    1.39 
   7   6  -2    5.52    1.71 
  -6  -6   1    2.41    0.73 
   6   6  -1    2.42    1.35 
  -5  -6   0    5.06    0.80 
   5   6   0    3.91    1.50 
   4   6   1    4.25    0.70 
   4   6   1    4.09    1.43 
   3   6   2    2.58    1.34 
   3   6   2    3.84    0.66 
   2   6   3    6.13    0.76 
   2   6   3    6.64    1.29 
   1   6   4    1.61    0.63 
   1   6   4    1.64    1.06 
   0   6   5   67.51    2.34 
   0   6   5   67.50    1.87 
  -1   6   6    6.24    1.01 
  -1   6   6    4.66    0.80 
  -2   6   7    2.89    0.92 
  -2   6   7    2.97    0.79 
  -3   6   8    7.01    0.99 
  -3   6   8    6.29    1.02 
  -4   6   9   22.37    1.48 
  -4   6   9   20.80    1.48 
  -5   6  10    0.38    0.74 
  -5   6  10    0.62    0.73 
  -6   6  11   13.89    1.41 
  -6   6  11   13.14    1.32 
  -7   6  12    3.99    1.08 
  -7   6  12    2.93    0.93 
  -8   6  13    2.63    1.03 
  -8   6  13    2.58    0.97 
  -9   6  14    0.46    0.89 
  10   5  -4    1.19    1.76 
   9   5  -3    0.80    1.47 
   8   5  -2    0.99    1.41 
  -7  -5   1   16.16    1.11 
   7   5  -1   13.19    1.93 
  -6  -5   0    0.47    0.63 
   6   5   0    1.79    1.30 
  -5  -5  -1   16.70    1.13 
   5   5   1   17.78    1.98 
   4   5   2   19.29    1.92 
   4   5   2   18.91    0.95 
   3   5   3    1.83    1.25 
   2   5   4    0.21    0.46 
   2   5   4   -0.65    0.90 
   1   5   5    5.49    1.08 
   1   5   5    6.10    0.71 
   0   5   6   41.39    1.52 
   0   5   6   41.69    1.98 
  -1   5   7    7.13    0.86 
  -1   5   7    7.13    1.03 
  -2   5   8    4.32    0.95 
  -2   5   8    4.07    0.80 
  -3   5   9    4.42    1.00 
  -3   5   9    3.10    0.84 
  -4   5  10    0.73    0.75 
  -4   5  10    0.81    0.78 
  -5   5  11    1.30    0.83 
  -5   5  11    0.98    0.82 
  -6   5  12    2.00    0.81 
  -6   5  12    2.13    0.87 
  -7   5  13   -0.78    0.77 
  -7   5  13    0.90    0.90 
  -8   5  14   -0.05    0.88 
  -9   5  15    5.66    1.26 
  10   4  -3    0.35    1.61 
   9   4  -2   10.14    1.95 
  -8  -4   1    6.70    0.85 
   8   4  -1    6.55    1.62 
  -7  -4   0    2.90    0.70 
   7   4   0    1.16    1.41 
  -6  -4  -1    3.47    0.78 
   6   4   1    2.81    1.44 
  -5  -4  -2   11.21    1.05 
   5   4   2   11.39    1.62 
   4   4   3    3.42    1.34 
   3   4   4    0.32    0.39 
   3   4   4    0.94    1.15 
   2   4   5    1.74    0.94 
   2   4   5    0.07    0.39 
   1   4   6   67.65    1.63 
   1   4   6   69.83    2.33 
   0   4   7    1.21    0.85 
   0   4   7    0.70    0.54 
  -1   4   8    2.57    0.82 
  -1   4   8    2.22    0.65 
  -2   4   9    7.29    0.88 
  -2   4   9    6.13    1.07 
  -3   4  10   -1.06    0.63 
  -3   4  10   -0.45    0.69 
  -4   4  11    2.73    0.79 
  -4   4  11    2.94    0.91 
  -5   4  12    0.60    0.82 
  -5   4  12    0.15    0.76 
  -6   4  13    7.20    1.20 
  -7   4  14    3.96    1.07 
  -8   4  15   -0.18    0.88 
  11   3  -3   -0.38    1.73 
  10   3  -2    1.38    1.64 
  -9  -3   1   10.74    1.00 
   9   3  -1   13.58    2.06 
  -8  -3   0    4.18    0.78 
   8   3   0    7.54    1.74 
  -7  -3  -1    0.46    0.62 
   7   3   1    0.94    1.29 
  -6  -3  -2    0.19    0.66 
   6   3   2    2.37    1.46 
  -5  -3  -3    7.61    0.93 
   5   3   3    9.28    1.50 
  -4  -3  -4    0.34    0.69 
   4   3   4    0.39    1.07 
   3   3   5    1.48    0.99 
   3   3   5    0.77    0.35 
   2   3   6    1.88    0.46 
   2   3   6    2.23    0.93 
   1   3   7    0.07    0.42 
   1   3   7    0.82    0.88 
   0   3   8    6.34    1.06 
   0   3   8    5.06    0.71 
  -1   3   9   -0.61    0.54 
  -1   3   9    0.52    0.76 
  -2   3  10   -0.34    0.64 
  -2   3  10    0.53    0.83 
  -3   3  11    2.62    0.85 
  -3   3  11    1.33    0.74 
  -4   3  12    0.63    0.79 
  -5   3  13    0.96    0.77 
  -6   3  14    8.48    1.26 
  -7   3  15    0.52    0.90 
  -8   3  16    2.90    1.03 
  11   2  -2    1.57    1.56 
 -10  -2   1   -1.16    0.61 
  10   2  -1    3.10    1.65 
  -9  -2   0    7.54    0.92 
   9   2   0    2.93    1.63 
  -8  -2  -1    8.15    0.92 
   8   2   1    6.20    1.64 
  -7  -2  -2    3.02    0.73 
   7   2   2    3.27    1.32 
  -6  -2  -3   16.29    1.17 
   6   2   3   16.99    1.86 
  -5  -2  -4    4.97    0.81 
   5   2   4    2.49    1.22 
  -4  -2  -5    4.70    0.80 
   4   2   5    2.75    1.11 
  -3  -2  -6    0.47    0.60 
   3   2   6    1.31    0.94 
   2   2   7   -1.41    0.81 
   1   2   8   -0.50    0.71 
   0   2   9    4.89    0.91 
  -1   2  10    1.35    0.79 
  -2   2  11   15.85    1.39 
  -3   2  12    0.95    0.85 
  -4   2  13    0.02    0.68 
  -5   2  14    1.37    0.91 
  -6   2  15    0.23    0.86 
  -7   2  16    2.02    0.98 
  -8   2  17   -0.09    0.89 
  11   1  -1    0.13    1.55 
 -10  -1   0   -0.01    0.63 
  10   1   0   -0.57    1.48 
  -9  -1  -1    4.43    0.83 
   9   1   1    3.88    1.58 
  -8  -1  -2    0.97    0.64 
   8   1   2    1.71    1.41 
  -7  -1  -3   -0.36    0.56 
   7   1   3    2.03    1.37 
  -6  -1  -4    0.12    0.68 
   6   1   4    0.79    1.28 
  -5  -1  -5    1.36    0.67 
   5   1   5    1.13    1.11 
  -4  -1  -6    3.19    0.73 
   4   1   6    1.78    1.04 
  -3  -1  -7    0.05    0.59 
   3   1   7    0.61    0.86 
   2   1   8    2.08    0.86 
   1   1   9   13.25    1.26 
   0   1  10    0.61    0.73 
  -1   1  11    3.50    0.96 
  -2   1  12   12.11    1.26 
  -3   1  13    2.34    0.85 
  -4   1  14    0.04    0.75 
  -5   1  15    1.60    0.85 
  -6   1  16    0.87    0.91 
  -7   1  17    0.38    0.86 
  12   0  -1    0.88    1.79 
 -11   0   0    1.87    0.82 
  11   0   0    2.33    1.62 
 -10   0  -1   -0.43    0.62 
  10   0   1   -1.45    1.26 
  -9   0  -2    4.24    0.82 
   9   0   2    2.48    1.47 
  -8   0  -3    4.00    0.79 
   8   0   3    5.23    1.50 
  -7   0  -4    1.17    0.69 
   7   0   4   -0.68    1.13 
  -6   0  -5    3.93    0.78 
   6   0   5    5.06    1.40 
  -5   0  -6    0.30    0.66 
   5   0   6    0.03    1.09 
  -4   0  -7    7.97    0.61 
  -4   0  -7    8.36    0.90 
   4   0   7    9.24    1.32 
  -3   0  -8    2.55    0.73 
   3   0   8    1.29    0.85 
  -2   0  -9   12.97    1.07 
   2   0   9   11.96    1.23 
  -1   0 -10    4.22    0.74 
   1   0  10    2.96    0.89 
   0   0  11    2.55    0.87 
  -1   0  12    7.45    1.07 
  -2   0  13    5.97    1.06 
  -3   0  14    1.32    0.81 
  -4   0  15   -0.15    0.77 
  -5   0  16    3.75    1.06 
  -6   0  17    0.85    0.96 
  -7   0  18    0.35    0.93 
 -12   1   0   -1.01    0.68 
  12  -1   0   -0.99    1.56 
 -11   1  -1   -0.17    0.70 
  11  -1   1    2.95    1.57 
 -10   1  -2    1.22    0.72 
  10  -1   2    2.13    1.53 
  -9   1  -3    4.58    0.89 
   9  -1   3    4.03    1.48 
  -8   1  -4    3.72    0.80 
   8  -1   4    1.95    1.20 
  -7   1  -5    6.58    0.92 
   7  -1   5    8.50    1.50 
  -6   1  -6    2.23    0.72 
   6  -1   6    3.01    1.29 
  -5   1  -7    1.46    0.67 
   5  -1   7   -0.72    1.03 
  -4   1  -8    3.19    0.73 
  -4   1  -8    3.05    0.67 
   4  -1   8    3.72    1.06 
  -3   1  -9   -0.27    0.59 
  -3   1  -9   -0.31    0.60 
   3  -1   9   -0.53    0.83 
  -2   1 -10    5.28    0.82 
  -2   1 -10    4.53    0.81 
   2  -1  10    4.77    0.97 
  -1   1 -11    1.39    0.72 
   1  -1  11   -0.44    0.75 
   0   1 -12    1.31    0.72 
   0  -1  12    1.59    0.80 
   1   1 -13    0.58    0.72 
  -1  -1  13    0.61    0.75 
  -2  -1  14    1.26    0.84 
  -3  -1  15   -0.08    0.80 
  -4  -1  16    0.59    0.81 
  -5  -1  17    0.38    0.97 
  -6  -1  18    2.92    1.12 
 -12   2  -1    0.07    0.73 
  12  -2   1    1.68    1.57 
 -11   2  -2   -0.39    0.69 
  11  -2   2    0.05    1.40 
 -10   2  -3    4.20    0.87 
  10  -2   3    2.32    1.43 
  -9   2  -4    1.52    0.70 
   9  -2   4    1.34    1.28 
  -8   2  -5   -0.29    0.65 
   8  -2   5   -0.46    1.12 
   7  -2   6    3.71    1.26 
  -6   2  -7    0.25    0.71 
   6  -2   7    0.65    1.12 
  -5   2  -8    5.26    0.89 
   5  -2   8    5.19    1.14 
  -4   2  -9   11.05    1.00 
  -4   2  -9    9.81    0.98 
   4  -2   9   10.40    1.23 
  -3   2 -10   27.64    1.59 
  -3   2 -10   30.16    1.41 
   3  -2  10   28.29    1.64 
  -2   2 -11    2.49    0.86 
  -2   2 -11    1.38    0.71 
   2  -2  11    2.78    0.88 
  -1   2 -12    7.87    0.93 
  -1   2 -12    8.44    1.15 
   1  -2  12    9.02    1.13 
   0   2 -13   17.89    1.52 
   0   2 -13   15.39    1.15 
   0  -2  13   15.82    1.35 
   1   2 -14    0.05    0.63 
  -1  -2  14   -0.52    0.76 
   2   2 -15    1.77    0.66 
  -2  -2  15    1.44    0.82 
  -3  -2  16    1.35    0.92 
  -4  -2  17   -0.72    0.78 
  -5  -2  18    0.42    0.94 
   6   2 -19    0.49    1.38 
  -6  -2  19    0.23    1.06 
 -12   3  -2    1.32    0.84 
  12  -3   2    3.29    1.60 
 -11   3  -3    2.47    0.84 
  11  -3   3    3.16    1.39 
 -10   3  -4    1.57    0.79 
  10  -3   4   -0.18    1.33 
  -9   3  -5    0.28    0.70 
   9  -3   5   -0.78    1.22 
  -8   3  -6    1.64    0.78 
   8  -3   6    2.49    1.19 
  -7   3  -7   10.07    1.03 
   7  -3   7   10.94    1.41 
  -6   3  -8   19.78    1.31 
   6  -3   8   17.60    1.52 
  -5   3  -9    6.00    0.93 
   5  -3   9    4.76    1.06 
  -4   3 -10    1.49    0.88 
  -4   3 -10    2.13    0.79 
   4  -3  10    2.97    0.93 
  -3   3 -11    1.30    0.96 
  -3   3 -11    0.31    0.71 
   3  -3  11    1.09    0.82 
  -2   3 -12    5.87    0.83 
  -2   3 -12    5.48    1.15 
   2  -3  12    4.95    0.97 
  -1   3 -13    4.46    0.80 
  -1   3 -13    3.35    1.08 
   1  -3  13    1.80    0.84 
   0   3 -14    6.04    1.23 
   0   3 -14    3.53    0.74 
   0  -3  14    6.14    0.99 
   1   3 -15    0.82    1.05 
   1   3 -15    0.14    0.61 
  -1  -3  15    0.80    0.77 
   2   3 -16    0.82    1.07 
  -2  -3  16   -0.34    0.73 
   3   3 -17    4.30    1.39 
  -3  -3  17    4.04    1.11 
   4   3 -18    3.33    1.42 
  -4  -3  18    1.89    1.08 
   5   3 -19    2.10    1.38 
  -5  -3  19   -0.48    1.02 
 -12   4  -3    6.75    1.14 
  12  -4   3    3.41    1.62 
 -11   4  -4    5.33    1.04 
  11  -4   4    6.13    1.52 
 -10   4  -5    3.53    0.92 
  10  -4   5    0.64    1.27 
  -9   4  -6    7.68    1.05 
   9  -4   6    8.53    1.43 
  -7   4  -8    0.48    0.71 
   7  -4   8   -0.80    0.90 
  -6   4  -9   49.11    1.78 
   6  -4   9   49.90    1.98 
  -5   4 -10   56.45    1.98 
  -5   4 -10   60.87    1.94 
   5  -4  10   56.42    2.00 
  -4   4 -11   14.43    1.13 
  -4   4 -11   15.20    1.38 
   4  -4  11   16.51    1.34 
  -3   4 -12    0.96    1.02 
  -3   4 -12    2.31    0.75 
   3  -4  12    1.54    0.81 
  -2   4 -13    2.97    1.11 
  -2   4 -13    3.66    0.78 
   2  -4  13    3.24    0.87 
  -1   4 -14   33.37    2.10 
  -1   4 -14   31.23    1.36 
   1  -4  14   31.46    1.65 
   0   4 -15    1.41    1.12 
   0   4 -15   -0.26    0.55 
   0  -4  15   -0.20    0.71 
   1   4 -16    1.22    1.19 
  -1  -4  16    0.60    0.84 
   2   4 -17    9.16    1.62 
  -2  -4  17    9.35    1.24 
   3   4 -18    3.27    1.37 
  -3  -4  18    1.97    1.02 
   4   4 -19    0.54    1.47 
  -4  -4  19    0.80    0.93 
 -12   5  -4    8.22    1.19 
 -11   5  -5    2.47    0.93 
 -10   5  -6    1.56    0.85 
  -9   5  -7   15.48    1.36 
   9  -5   7   17.11    1.68 
  -8   5  -8   13.14    1.24 
   8  -5   8   14.15    1.42 
  -7   5  -9    1.69    0.76 
   7  -5   9    1.42    0.95 
  -6   5 -10   -0.56    0.67 
   6  -5  10    1.49    0.84 
  -5   5 -11   31.86    1.51 
  -5   5 -11   31.86    1.81 
   5  -5  11   32.22    1.62 
  -4   5 -12    7.43    1.27 
  -4   5 -12    8.43    0.99 
   4  -5  12    8.51    1.01 
  -3   5 -13    2.43    1.17 
  -3   5 -13    0.44    0.62 
   3  -5  13    0.32    0.69 
  -2   5 -14    8.26    0.92 
  -2   5 -14    8.21    1.46 
   2  -5  14    8.27    1.08 
  -1   5 -15   26.67    1.31 
  -1   5 -15   25.27    2.07 
   1  -5  15   27.89    1.57 
   0   5 -16    1.10    1.29 
   0  -5  16    0.85    0.83 
   1   5 -17    4.60    1.53 
  -1  -5  17    2.42    0.93 
   2   5 -18   12.22    1.92 
  -2  -5  18   10.71    1.35 
   3   5 -19    4.82    1.75 
  -3  -5  19    5.63    1.21 
 -12   6  -5    0.39    0.80 
 -11   6  -6    0.22    0.84 
 -10   6  -7    5.60    1.04 
  -9   6  -8   10.56    1.21 
  -8   6  -9    5.49    0.96 
  -7   6 -10   -0.21    0.67 
  -6   6 -11   19.30    1.46 
   6  -6  11   22.52    1.41 
  -5   6 -12   12.33    1.44 
  -5   6 -12   12.31    1.19 
   5  -6  12   11.87    1.13 
  -4   6 -13    0.45    0.69 
  -4   6 -13    0.35    1.14 
   4  -6  13   -0.08    0.64 
  -3   6 -14    1.59    1.19 
  -3   6 -14    0.54    0.70 
   3  -6  14    1.17    0.77 
  -2   6 -15    0.73    0.66 
  -2   6 -15    1.03    1.28 
   2  -6  15    1.80    0.75 
  -1   6 -16   -0.83    0.59 
  -1   6 -16    1.46    1.45 
   1  -6  16   -0.24    0.73 
   0   6 -17    3.16    1.44 
   0  -6  17    2.70    0.92 
   1   6 -18    6.41    1.82 
  -1  -6  18    6.79    1.19 
   2   6 -19   13.31    2.18 
  -2  -6  19   10.45    1.38 
 -11   7  -7    0.20    0.85 
 -10   7  -8    0.12    0.82 
  -9   7  -9    3.86    1.01 
  -8   7 -10    1.04    0.85 
  -7   7 -11    6.44    1.10 
  -6   7 -12    4.49    0.91 
  -5   7 -13   -0.91    1.00 
  -5   7 -13    0.73    0.75 
  -4   7 -14    0.12    0.68 
  -4   7 -14    0.05    1.17 
  -3   7 -15    8.55    1.60 
  -3   7 -15    8.53    1.03 
   3  -7  15    8.23    1.03 
  -2   7 -16    0.43    0.66 
  -2   7 -16   -1.74    1.29 
   2  -7  16    0.29    0.76 
  -1   7 -17   -1.89    1.41 
   1  -7  17    0.09    0.77 
   0   7 -18   -0.34    1.46 
   0  -7  18    0.31    0.82 
   1   7 -19    7.83    2.08 
  -1  -7  19    9.87    1.35 
 -11   8  -8   -1.37    0.83 
 -10   8  -9   -0.30    0.77 
  -9   8 -10    3.85    1.06 
  -8   8 -11    1.05    0.82 
  -7   8 -12    3.97    1.00 
  -6   8 -13    0.96    0.82 
  -5   8 -14   -0.78    1.13 
  -5   8 -14    1.04    0.78 
  -4   8 -15    5.82    1.00 
  -4   8 -15    4.56    1.47 
  -3   8 -16   -0.78    1.37 
  -3   8 -16    0.32    0.70 
  -2   8 -17   -0.19    1.48 
  -1   8 -18    2.31    1.74 
   0   8 -19    9.87    2.24 
 -10   9 -10   -1.09    0.84 
  -9   9 -11    2.34    0.97 
  -8   9 -12    0.82    0.88 
  -7   9 -13    2.72    0.98 
  -6   9 -14    0.10    0.77 
  -5   9 -15   -1.16    1.22 
  -5   9 -15    0.63    0.77 
  -4   9 -16   -0.26    1.51 
  -4   9 -16    0.04    0.75 
  -3   9 -17    3.12    1.74 
  -2   9 -18   -1.80    1.68 
  -8  10 -13    0.35    0.89 
  -7  10 -14   -0.73    0.78 
  -6  10 -15    0.70    0.85 
  -5  10 -16    1.59    0.84 
  -5  10 -16   -1.34    1.48 
  -4  10 -17    1.44    1.69 
  -1  14  -1    1.16    1.09 
  -2  14   0    0.48    1.06 
  -3  14   1    1.39    1.11 
  -4  14   2   -1.31    1.00 
  -5  14   3    1.59    1.06 
   2  13  -3    0.98    1.09 
   1  13  -2   11.03    1.50 
   0  13  -1    5.02    1.24 
  -1  13   0    2.82    1.11 
  -2  13   1    7.03    1.31 
  -3  13   2    4.53    1.20 
  -4  13   3   -0.18    0.96 
  -5  13   4    5.99    1.30 
  -6  13   5    1.39    0.96 
   3  12  -3    2.21    1.57 
   2  12  -2    2.53    1.47 
   2  12  -2    2.27    1.06 
   1  12  -1    1.06    0.96 
   1  12  -1    0.20    1.22 
   0  12   0    1.41    0.98 
  -1  12   1    0.06    0.87 
  -2  12   2   -1.62    0.80 
  -3  12   3    2.55    0.97 
  -4  12   4    0.00    0.90 
  -5  12   5    0.58    0.89 
  -6  12   6    4.64    1.21 
  -7  12   7    1.66    1.05 
   5  11  -4    1.23    1.56 
   4  11  -3   -1.87    1.34 
   3  11  -2   -0.47    0.92 
   3  11  -2   -1.89    1.18 
   2  11  -1   -0.22    0.83 
   2  11  -1   -1.08    1.16 
   1  11   0   -0.27    1.18 
   1  11   0    0.56    0.85 
   0  11   1   -0.82    0.98 
   0  11   1   -0.35    0.79 
  -1  11   2    2.78    0.98 
  -1  11   2    2.73    1.10 
  -2  11   3    2.18    0.98 
  -2  11   3    2.65    0.98 
  -3  11   4   -1.41    0.75 
  -3  11   4    0.99    0.83 
  -4  11   5    3.41    1.06 
  -5  11   6    3.44    1.07 
  -6  11   7   -0.76    0.79 
  -7  11   8    1.20    1.03 
  -8  11   9    3.83    1.19 
   6  10  -4    0.69    1.63 
   5  10  -3    0.62    1.46 
   4  10  -2    1.47    1.42 
   3  10  -1    1.31    1.25 
   3  10  -1   -0.04    0.87 
   2  10   0    7.60    1.14 
   2  10   0    3.84    1.35 
   1  10   1    2.75    1.18 
   1  10   1    0.67    0.79 
   0  10   2   -0.63    0.94 
   0  10   2   -0.50    0.70 
  -1  10   3    0.11    0.69 
  -1  10   3   -0.76    0.92 
  -2  10   4   -0.87    0.69 
  -2  10   4   -0.50    0.86 
  -3  10   5    2.57    0.90 
  -3  10   5    1.69    0.83 
  -4  10   6   -0.89    0.74 
  -4  10   6    0.98    0.80 
  -5  10   7    0.70    0.83 
  -5  10   7   -0.28    0.73 
  -6  10   8   -0.24    0.75 
  -6  10   8   -0.36    0.86 
  -7  10   9   -0.86    0.78 
  -8  10  10    3.77    1.23 
   7   9  -4   -0.69    1.65 
   6   9  -3    1.33    1.62 
   5   9  -2    3.21    1.54 
   4   9  -1    1.03    1.32 
   3   9   0   10.07    1.15 
   3   9   0    6.64    1.53 
   2   9   1    1.97    0.84 
   2   9   1    2.22    1.25 
   1   9   2   -0.85    0.64 
   1   9   2   -1.32    1.01 
   0   9   3    2.21    1.00 
   0   9   3    1.64    0.77 
  -1   9   4    1.61    0.78 
  -1   9   4    2.83    0.96 
  -2   9   5    1.83    0.88 
  -2   9   5    2.90    0.86 
  -3   9   6    3.24    0.91 
  -3   9   6    0.80    0.80 
  -4   9   7    2.89    0.95 
  -4   9   7    2.29    0.95 
  -5   9   8   -0.45    0.81 
  -5   9   8   -0.06    0.78 
  -6   9   9    0.75    0.89 
  -6   9   9    0.93    0.79 
  -7   9  10   -0.07    0.77 
  -7   9  10   -0.79    0.81 
  -8   9  11    6.50    1.34 
  -8   9  11    5.46    1.13 
   8   8  -4   -1.77    1.44 
   7   8  -3    5.23    1.78 
   6   8  -2    3.95    1.66 
  -5  -8   1    1.22    0.74 
   5   8  -1    1.49    1.46 
   4   8   0    3.98    1.43 
   3   8   1   12.39    1.10 
   3   8   1    8.99    1.57 
   2   8   2    2.82    0.75 
   2   8   2    2.35    1.22 
   1   8   3    0.28    0.63 
   1   8   3    0.10    1.04 
   0   8   4   -0.51    0.63 
   0   8   4   -0.34    0.89 
  -1   8   5    0.03    0.85 
  -1   8   5    0.88    0.69 
  -2   8   6    2.16    0.88 
  -2   8   6    1.60    0.74 
  -3   8   7    0.27    0.72 
  -3   8   7   -0.74    0.73 
  -4   8   8   10.76    1.24 
  -4   8   8   11.26    1.26 
  -5   8   9    2.54    0.96 
  -5   8   9    2.66    0.86 
  -6   8  10    0.80    0.84 
  -7   8  11   -0.23    0.78 
  -7   8  11    0.54    0.87 
  -8   8  12    3.56    1.09 
  -8   8  12    6.17    1.33 
   8   7  -3    0.69    1.63 
   7   7  -2    1.67    1.54 
  -6  -7   1    8.56    1.00 
   6   7  -1    6.90    1.79 
  -5  -7   0    0.17    0.72 
   5   7   0    0.61    1.29 
   4   7   1    8.68    1.59 
   3   7   2   27.09    2.10 
   3   7   2   27.37    1.31 
   2   7   3   12.03    1.54 
   2   7   3    9.42    0.93 
   1   7   4    1.19    0.63 
   1   7   4   -0.17    0.91 
   0   7   5   16.07    1.51 
   0   7   5   15.29    1.21 
  -1   7   6   31.17    1.56 
  -1   7   6   30.98    1.84 
  -2   7   7    4.49    0.99 
  -2   7   7    4.49    0.88 
  -3   7   8    6.57    1.08 
  -3   7   8    8.68    1.09 
  -4   7   9   -0.35    0.75 
  -4   7   9    0.91    0.78 
  -5   7  10   -0.91    0.70 
  -5   7  10   -0.33    0.79 
  -6   7  11    2.16    0.87 
  -6   7  11    0.07    0.88 
  -7   7  12    1.09    0.91 
  -7   7  12    2.26    0.92 
  -8   7  13   14.30    1.69 
  -8   7  13   17.10    1.64 
   9   6  -3    1.83    1.72 
   8   6  -2    3.63    1.69 
  -7  -6   1    5.75    0.87 
   7   6  -1    5.39    1.72 
  -6  -6   0    7.16    0.93 
   6   6   0    8.02    1.70 
  -5  -6  -1   -0.11    0.63 
   5   6   1   -1.11    1.26 
   4   6   2    4.81    1.42 
   3   6   3    9.91    0.82 
   3   6   3    8.38    1.49 
   2   6   4    4.27    0.68 
   2   6   4    5.89    1.36 
   1   6   5    0.85    0.58 
   1   6   5    0.73    1.03 
   0   6   6   12.70    1.39 
   0   6   6   13.86    1.08 
  -1   6   7   12.01    1.06 
  -1   6   7   10.35    1.26 
  -2   6   8    2.37    0.75 
  -2   6   8    2.54    0.89 
  -3   6   9    1.84    0.86 
  -3   6   9    2.19    0.80 
  -4   6  10    3.28    0.93 
  -4   6  10    4.03    0.89 
  -5   6  11    0.45    0.72 
  -5   6  11    0.35    0.83 
  -6   6  12    0.42    0.83 
  -6   6  12    0.64    0.90 
  -7   6  13    0.16    0.80 
  -7   6  13    0.18    0.93 
  -8   6  14   23.15    1.79 
  -8   6  14   22.00    2.01 
  10   5  -3    1.07    1.64 
   9   5  -2   -0.05    1.56 
   8   5  -1   19.36    2.30 
  -7  -5   0    8.33    0.94 
   7   5   0    6.69    1.72 
  -6  -5  -1   -0.34    0.61 
   6   5   1    1.54    1.41 
  -5  -5  -2    8.12    0.99 
   5   5   2   10.17    1.69 
   4   5   3   25.02    2.08 
   3   5   4    0.66    0.45 
   3   5   4    1.38    1.26 
   2   5   5    8.23    1.31 
   2   5   5    9.42    0.80 
   1   5   6    1.19    0.57 
   1   5   6    1.28    1.02 
   0   5   7    4.08    0.99 
   0   5   7    3.49    0.68 
  -1   5   8   -0.83    0.81 
  -1   5   8   -0.24    0.58 
  -2   5   9   28.90    1.56 
  -2   5   9   30.07    1.78 
  -3   5  10   10.00    1.22 
  -3   5  10    7.24    0.99 
  -4   5  11    1.18    0.74 
  -4   5  11    1.44    0.85 
  -5   5  12    1.16    0.86 
  -5   5  12    1.84    0.89 
  -6   5  13   -1.17    0.73 
  -6   5  13   -0.15    0.80 
  -7   5  14    8.86    1.33 
  -8   5  15    3.77    1.15 
  10   4  -2    1.10    1.71 
   9   4  -1    8.89    1.85 
  -8  -4   0   12.42    1.07 
   8   4   0   12.88    1.94 
  -7  -4  -1    4.67    0.81 
   7   4   1    3.62    1.48 
  -6  -4  -2    0.63    0.68 
   6   4   2    2.36    1.30 
   5   4   3    3.93    1.34 
  -4  -4  -4    5.17    0.85 
   4   4   4    5.91    1.51 
   3   4   5   -0.70    1.12 
   3   4   5   -0.04    0.39 
   2   4   6   19.49    1.62 
   2   4   6   22.33    1.02 
   1   4   7   17.55    1.05 
   1   4   7   15.97    1.41 
   0   4   8    2.71    0.65 
   0   4   8    1.97    0.96 
  -1   4   9    7.90    1.09 
  -1   4   9    8.09    0.92 
  -2   4  10   21.08    1.44 
  -2   4  10   23.93    1.67 
  -3   4  11   61.41    2.17 
  -3   4  11   59.48    2.25 
  -4   4  12   -0.49    0.75 
  -4   4  12   -0.09    0.70 
  -5   4  13    4.43    1.06 
  -5   4  13    3.02    0.96 
  -6   4  14   11.08    1.37 
  -7   4  15    5.62    1.20 
  -8   4  16    1.12    1.03 
  11   3  -2    1.37    1.66 
  10   3  -1   -0.85    1.43 
  -9  -3   0    4.59    0.83 
   9   3   0    7.67    1.84 
  -8  -3  -1    0.52    0.66 
   8   3   1    1.32    1.40 
  -7  -3  -2    2.17    0.71 
   7   3   2    2.14    1.38 
  -6  -3  -3   11.17    1.05 
   6   3   3    7.80    1.50 
  -5  -3  -4   25.55    1.40 
   5   3   4   25.80    2.12 
  -4  -3  -5    1.96    0.76 
   4   3   5    2.85    1.27 
   3   3   6    4.36    1.15 
   3   3   6    5.94    0.55 
   2   3   7   32.73    1.15 
   2   3   7   34.01    1.85 
   1   3   8   16.54    1.04 
   1   3   8   16.66    1.42 
   0   3   9   -0.24    0.53 
   0   3   9   -1.19    0.78 
  -1   3  10    3.49    0.94 
  -1   3  10    5.60    0.87 
  -2   3  11   57.58    2.27 
  -2   3  11   61.03    2.10 
  -3   3  12    5.10    1.06 
  -4   3  13    2.59    0.95 
  -5   3  14   10.64    1.32 
  -6   3  15   13.34    1.51 
  -7   3  16    2.28    1.05 
  -8   3  17    1.22    1.05 
  11   2  -1    0.64    1.72 
 -10  -2   0    6.07    0.93 
  10   2   0    6.91    1.73 
  -9  -2  -1    4.77    0.84 
   9   2   1    3.41    1.66 
  -8  -2  -2    0.25    0.66 
   8   2   2   -0.98    1.30 
  -7  -2  -3    8.51    0.98 
   7   2   3    8.61    1.55 
  -6  -2  -4    6.47    0.92 
   6   2   4    6.30    1.53 
  -5  -2  -5    9.17    1.02 
   5   2   5   11.80    1.66 
  -4  -2  -6    0.58    0.69 
   4   2   6    0.74    1.07 
  -3  -2  -7    7.97    0.93 
   3   2   7    7.33    1.22 
   2   2   8   53.56    2.10 
   1   2   9    7.50    1.09 
   0   2  10    2.65    0.92 
  -1   2  11   13.22    1.32 
  -2   2  12   25.22    1.70 
  -3   2  13    1.62    0.87 
  -4   2  14    0.50    0.84 
  -5   2  15   13.39    1.52 
  -6   2  16    2.48    0.99 
  -7   2  17    3.97    1.23 
 -11  -1   0    1.48    0.78 
  11   1   0    3.51    1.76 
 -10  -1  -1    6.32    0.96 
  10   1   1    4.67    1.71 
  -9  -1  -2    5.24    0.87 
   9   1   2    8.11    1.79 
  -8  -1  -3    2.99    0.79 
   8   1   3    3.81    1.50 
  -7  -1  -4    3.31    0.78 
   7   1   4    2.38    1.29 
  -6  -1  -5    7.13    0.96 
   6   1   5    7.41    1.53 
  -5  -1  -6   26.14    1.37 
   5   1   6   33.87    2.32 
  -4  -1  -7    1.44    0.72 
   4   1   7    0.84    1.03 
  -3  -1  -8   14.40    1.12 
   3   1   8   13.42    1.43 
  -2  -1  -9    7.52    0.97 
   2   1   9    6.65    1.16 
   1   1  10    1.14    0.81 
   0   1  11   15.61    1.41 
  -1   1  12   10.48    1.22 
  -2   1  13    0.28    0.80 
  -3   1  14    5.77    1.11 
  -4   1  15    5.29    1.04 
  -5   1  16    8.82    1.34 
  -6   1  17    0.05    0.90 
  -7   1  18    5.73    1.34 
 -12   0   0   -0.18    0.77 
  12   0   0   -1.28    1.68 
 -11   0  -1    2.81    0.85 
  11   0   1    2.53    1.66 
 -10   0  -2    6.68    0.98 
  10   0   2    3.42    1.64 
  -9   0  -3    0.12    0.66 
   9   0   3    1.15    1.42 
  -8   0  -4    3.55    0.77 
   8   0   4    3.50    1.45 
  -7   0  -5    4.54    0.85 
   7   0   5    6.03    1.46 
  -6   0  -6    8.02    0.95 
   6   0   6    7.29    1.49 
  -5   0  -7    1.32    0.77 
   5   0   7    2.44    1.23 
  -4   0  -8    1.89    0.79 
   4   0   8    0.90    0.97 
  -3   0  -9   10.27    0.85 
  -3   0  -9    9.64    1.04 
   3   0   9   10.94    1.30 
  -2   0 -10   44.53    1.61 
   2   0  10   45.47    2.02 
  -1   0 -11    4.42    0.88 
   1   0  11    2.41    0.87 
   0   0  12   15.08    1.40 
  -1   0  13    2.45    0.89 
  -2   0  14    7.45    1.15 
  -3   0  15    3.04    0.91 
  -4   0  16   17.51    1.63 
  -5   0  17    4.89    1.20 
  -6   0  18    2.30    1.08 
 -12   1  -1   -0.04    0.77 
  12  -1   1    1.43    1.74 
 -11   1  -2    7.26    1.08 
  11  -1   2    5.89    1.81 
 -10   1  -3    0.24    0.73 
  10  -1   3    1.00    1.43 
  -9   1  -4   -1.00    0.67 
   9  -1   4   -1.29    1.29 
  -8   1  -5    0.72    0.65 
   8  -1   5    0.35    1.26 
  -7   1  -6    3.63    0.84 
   7  -1   6    5.15    1.38 
  -6   1  -7    1.15    0.66 
   6  -1   7    0.98    1.14 
  -5   1  -8    0.07    0.71 
   5  -1   8    1.66    1.12 
  -4   1  -9    0.06    0.70 
   4  -1   9    1.58    1.00 
  -3   1 -10   -0.15    0.67 
  -3   1 -10    0.20    0.72 
   3  -1  10    0.49    0.91 
  -2   1 -11    2.85    0.79 
  -2   1 -11    1.60    0.81 
   2  -1  11    3.06    0.98 
  -1   1 -12    2.32    0.81 
   1  -1  12    2.06    0.85 
   0   1 -13    9.30    0.99 
   0  -1  13    9.77    1.22 
   1   1 -14    1.31    0.71 
  -1  -1  14    1.80    0.88 
   2   1 -15    0.78    0.69 
  -2  -1  15    0.51    0.79 
   3   1 -16    0.39    0.67 
  -3  -1  16   -0.09    0.77 
  -4  -1  17    1.90    1.00 
  -5  -1  18    0.43    0.92 
  -6  -1  19   -1.01    0.96 
 -12   2  -2    1.01    0.81 
  12  -2   2    0.41    1.56 
 -11   2  -3    2.91    0.89 
  11  -2   3   -0.70    1.47 
 -10   2  -4    1.18    0.78 
  10  -2   4   -1.38    1.28 
  -9   2  -5    0.20    0.75 
   9  -2   5    0.30    1.27 
  -8   2  -6   28.03    1.51 
   8  -2   6   26.26    2.09 
  -7   2  -7   11.05    1.12 
   7  -2   7   12.41    1.53 
  -6   2  -8    3.16    0.83 
   6  -2   8    3.10    1.17 
  -5   2  -9    4.69    0.86 
   5  -2   9    7.11    1.21 
  -4   2 -10    4.15    0.89 
  -4   2 -10    6.49    0.98 
   4  -2  10    5.16    1.13 
  -3   2 -11    0.19    0.65 
  -3   2 -11    0.69    0.83 
   3  -2  11    1.76    0.83 
  -2   2 -12    1.39    0.90 
  -2   2 -12    0.76    0.70 
   2  -2  12   -0.32    0.81 
  -1   2 -13    1.70    0.93 
  -1   2 -13    1.40    0.74 
   1  -2  13    1.24    0.79 
   0   2 -14   12.35    1.37 
   0   2 -14   10.46    1.01 
   0  -2  14   11.11    1.27 
   1   2 -15   30.19    1.37 
  -1  -2  15   32.05    1.83 
   2   2 -16    0.60    0.70 
  -2  -2  16    1.29    0.90 
  -3  -2  17    0.12    0.90 
  -4  -2  18   -0.42    0.81 
   5   2 -19    7.28    1.67 
  -5  -2  19    5.40    1.34 
 -12   3  -3   -1.36    0.73 
  12  -3   3    0.90    1.51 
 -11   3  -4    0.50    0.78 
  11  -3   4   -0.54    1.31 
 -10   3  -5    2.38    0.87 
  10  -3   5    1.30    1.28 
  -9   3  -6    2.85    0.89 
   9  -3   6    1.73    1.30 
  -8   3  -7    3.65    0.91 
   8  -3   7    1.74    1.22 
  -7   3  -8    1.14    0.72 
   7  -3   8    0.75    1.05 
  -6   3  -9    3.65    0.86 
   6  -3   9    5.39    1.18 
  -5   3 -10    0.11    0.65 
   5  -3  10    0.91    0.92 
  -4   3 -11   -1.38    0.64 
  -4   3 -11   -0.12    0.81 
   4  -3  11    0.87    0.83 
  -3   3 -12   -0.45    0.89 
  -3   3 -12    0.62    0.72 
   3  -3  12   -0.26    0.76 
  -2   3 -13    1.41    0.72 
  -2   3 -13    1.22    0.99 
   2  -3  13    1.67    0.85 
  -1   3 -14   14.78    1.13 
  -1   3 -14   16.35    1.55 
   1  -3  14   16.38    1.41 
   0   3 -15   -0.31    0.61 
   0   3 -15   -0.61    0.99 
   0  -3  15   -0.98    0.72 
   1   3 -16    6.87    0.89 
   1   3 -16    7.97    1.49 
  -1  -3  16    7.85    1.12 
   2   3 -17    0.82    1.22 
  -2  -3  17   -0.27    0.86 
   3   3 -18    2.08    1.34 
  -3  -3  18   -0.31    0.94 
   4   3 -19    4.90    1.56 
  -4  -3  19    0.29    1.00 
 -12   4  -4    1.07    0.91 
 -11   4  -5    1.99    0.87 
  11  -4   5   -2.04    1.32 
 -10   4  -6    0.49    0.77 
  10  -4   6   -0.38    1.18 
  -9   4  -7   -0.77    0.67 
   9  -4   7    0.05    1.19 
  -8   4  -8    1.09    0.73 
   8  -4   8    0.51    1.13 
  -7   4  -9    2.99    0.85 
   7  -4   9    5.70    1.20 
  -6   4 -10    1.95    0.74 
   6  -4  10    1.56    0.98 
  -5   4 -11    6.53    0.98 
   5  -4  11    5.83    1.03 
  -4   4 -12    9.21    1.22 
  -4   4 -12    8.66    1.01 
   4  -4  12    9.65    1.15 
  -3   4 -13    3.85    1.11 
  -3   4 -13    5.08    0.88 
   3  -4  13    4.64    0.99 
  -2   4 -14    5.58    1.22 
  -2   4 -14    2.61    0.77 
   2  -4  14    2.90    0.89 
  -1   4 -15    9.68    1.43 
  -1   4 -15    9.20    0.96 
   1  -4  15    8.20    1.15 
   0   4 -16   16.04    1.17 
   0   4 -16   18.04    1.84 
   0  -4  16   18.86    1.55 
   1   4 -17    2.80    1.31 
  -1  -4  17   -0.28    0.82 
   2   4 -18   -1.34    1.23 
  -2  -4  18   -0.09    0.87 
   3   4 -19   -0.81    1.37 
  -3  -4  19   -0.86    0.96 
 -12   5  -5    2.04    0.96 
 -11   5  -6    0.31    0.84 
 -10   5  -7   -1.38    0.70 
  -9   5  -8    4.62    0.96 
   9  -5   8    2.56    1.21 
  -8   5  -9    0.56    0.72 
   8  -5   9   -1.26    0.89 
  -7   5 -10    8.51    1.12 
   7  -5  10    8.12    1.21 
  -6   5 -11   -0.06    0.75 
   6  -5  11   -0.31    0.81 
  -5   5 -12   13.18    1.21 
   5  -5  12   12.25    1.25 
  -4   5 -13    0.62    0.72 
  -4   5 -13    1.11    1.09 
   4  -5  13    1.25    0.85 
  -3   5 -14   -0.81    1.10 
  -3   5 -14    0.48    0.67 
   3  -5  14    0.50    0.76 
  -2   5 -15    0.82    1.21 
  -2   5 -15    0.94    0.72 
   2  -5  15    0.99    0.80 
  -1   5 -16    3.07    0.77 
  -1   5 -16    3.65    1.38 
   1  -5  16    1.33    0.84 
   0   5 -17    3.82    1.38 
   0  -5  17    1.58    0.88 
   1   5 -18   -0.27    1.34 
  -1  -5  18    2.14    0.97 
   2   5 -19    4.75    1.68 
  -2  -5  19    1.81    1.05 
   3   5 -20    2.40    1.71 
  -3  -5  20    1.85    1.06 
 -11   6  -7    0.12    0.77 
 -10   6  -8    0.66    0.79 
  -9   6  -9    2.47    0.95 
  -8   6 -10    0.83    0.82 
  -7   6 -11    0.70    0.82 
  -6   6 -12    9.14    1.18 
  -5   6 -13   21.89    1.47 
   5  -6  13   19.49    1.38 
  -4   6 -14   -0.42    1.09 
  -4   6 -14    1.51    0.78 
   4  -6  14    0.20    0.78 
  -3   6 -15   -1.01    1.17 
  -3   6 -15    0.39    0.74 
   3  -6  15    0.16    0.72 
  -2   6 -16    5.89    1.57 
  -2   6 -16    5.13    0.90 
   2  -6  16    4.38    0.97 
  -1   6 -17    0.82    1.46 
   1  -6  17    1.19    0.82 
   0   6 -18   -0.37    1.44 
   0  -6  18    1.86    0.91 
   1   6 -19   -0.86    1.60 
  -1  -6  19    2.70    1.05 
 -11   7  -8    0.30    0.89 
 -10   7  -9   -0.51    0.77 
  -9   7 -10    6.11    1.12 
  -8   7 -11    0.75    0.86 
  -7   7 -12    3.51    0.94 
  -6   7 -13    3.88    0.94 
  -5   7 -14    1.81    0.85 
  -5   7 -14    0.30    1.22 
  -4   7 -15    0.17    0.72 
  -4   7 -15   -1.11    1.17 
  -3   7 -16   -0.86    1.36 
  -3   7 -16    0.29    0.69 
  -2   7 -17    0.36    1.41 
   2  -7  17    2.17    0.88 
  -1   7 -18    0.70    1.43 
   1  -7  18    2.13    0.95 
   0   7 -19    2.84    1.82 
   0  -7  19    1.93    1.05 
 -10   8 -10    5.71    1.22 
  -9   8 -11    4.70    1.10 
  -8   8 -12   -1.01    0.78 
  -7   8 -13   11.97    1.37 
  -6   8 -14   10.69    1.30 
  -5   8 -15    2.76    1.35 
  -5   8 -15    3.49    0.98 
  -4   8 -16    1.94    0.81 
  -4   8 -16   -0.59    1.34 
  -3   8 -17    1.45    1.51 
  -2   8 -18    0.75    1.68 
  -1   8 -19    4.49    1.93 
  -9   9 -12    0.49    0.96 
  -8   9 -13    4.37    1.13 
  -7   9 -14    1.04    0.92 
  -6   9 -15    0.03    0.78 
  -5   9 -16    4.14    0.97 
  -4   9 -17    1.16    1.71 
  -3   9 -18    2.32    1.78 
  -2  14   1    0.24    1.02 
  -3  14   2    3.80    1.26 
   1  13  -1    1.38    1.07 
   0  13   0    3.28    1.18 
  -1  13   1   -0.16    0.93 
  -2  13   2    2.90    1.12 
  -3  13   3    5.46    1.31 
  -4  13   4    1.05    1.03 
  -5  13   5    1.04    1.06 
   3  12  -2   -1.71    1.41 
   2  12  -1    1.55    1.07 
   2  12  -1   -0.45    1.31 
   1  12   0    5.61    1.15 
   1  12   0    3.57    1.37 
   0  12   1    3.03    1.05 
   0  12   1   -0.45    1.16 
  -1  12   2   -0.06    0.83 
  -2  12   3   11.60    1.42 
  -3  12   4    4.50    1.13 
  -4  12   5   -0.67    0.85 
  -5  12   6    6.86    1.26 
  -6  12   7    4.66    1.21 
   4  11  -2    3.82    1.60 
   3  11  -1   -1.62    1.27 
   2  11   0    5.13    1.45 
   2  11   0    7.06    1.18 
   1  11   1    0.39    0.88 
   1  11   1    1.11    1.27 
   0  11   2    0.70    0.84 
   0  11   2   -1.32    1.03 
  -1  11   3    9.42    1.27 
  -1  11   3    7.91    1.28 
  -2  11   4   21.00    1.70 
  -2  11   4   26.46    1.88 
  -3  11   5    4.35    1.02 
  -3  11   5    3.99    1.01 
  -4  11   6   -0.23    0.83 
  -5  11   7    7.54    1.32 
  -6  11   8   11.60    1.57 
  -7  11   9    1.49    1.07 
   5  10  -2    8.32    1.88 
   4  10  -1   -1.93    1.24 
   3  10   0    0.44    1.33 
   2  10   1    3.32    0.94 
   2  10   1    0.60    1.23 
   1  10   2    1.29    1.15 
   1  10   2   -0.11    0.79 
   0  10   3    0.65    0.77 
   0  10   3   -0.32    0.97 
  -1  10   4   10.37    1.35 
  -1  10   4   12.30    1.34 
  -2  10   5    1.33    0.79 
  -2  10   5    2.06    0.94 
  -3  10   6   -0.69    0.72 
  -3  10   6    0.44    0.81 
  -4  10   7    0.17    0.83 
  -4  10   7   -0.55    0.83 
  -5  10   8    6.40    1.09 
  -5  10   8    5.45    1.12 
  -6  10   9    1.70    0.89 
  -6  10   9    1.29    0.96 
  -7  10  10   -0.12    0.93 
   6   9  -2    7.12    1.85 
   5   9  -1    2.15    1.50 
   4   9   0   -2.07    1.26 
   3   9   1    0.94    1.35 
   2   9   2   13.44    1.22 
   2   9   2   11.70    1.61 
   1   9   3   -0.10    0.66 
   1   9   3   -0.55    1.06 
   0   9   4    1.97    0.80 
   0   9   4    1.17    1.06 
  -1   9   5    7.60    1.03 
  -1   9   5    9.13    1.29 
  -2   9   6    4.82    0.97 
  -2   9   6    3.86    1.01 
  -3   9   7   -0.94    0.65 
  -3   9   7   -0.25    0.79 
  -4   9   8    4.41    1.04 
  -4   9   8    3.83    1.00 
  -5   9   9    4.15    1.03 
  -5   9   9    3.70    1.04 
  -6   9  10    0.58    0.86 
  -6   9  10   -0.31    0.78 
  -7   9  11   12.73    1.50 
  -7   9  11   14.38    1.63 
  -8   9  12    6.34    1.23 
  -8   9  12    4.13    1.27 
   7   8  -2    2.99    1.67 
   6   8  -1    6.64    1.65 
  -5  -8   0    0.76    0.74 
   5   8   0    0.69    1.39 
   4   8   1    3.71    1.40 
   3   8   2    2.62    1.35 
   2   8   3    1.50    1.10 
   2   8   3   -0.16    0.62 
   1   8   4   -0.96    1.00 
   1   8   4    1.68    0.72 
   0   8   5    2.05    0.74 
   0   8   5    2.54    1.04 
  -1   8   6    2.14    0.99 
  -1   8   6    1.79    0.72 
  -2   8   7    0.73    0.83 
  -2   8   7    0.44    0.72 
  -3   8   8    0.36    0.78 
  -3   8   8    0.35    0.82 
  -4   8   9   12.69    1.37 
  -4   8   9   10.72    1.27 
  -5   8  10    5.68    1.12 
  -5   8  10    4.15    1.08 
  -6   8  11    0.69    0.86 
  -6   8  11   -0.26    0.80 
  -7   8  12    4.23    1.21 
  -7   8  12    6.51    1.25 
  -8   8  13    1.23    0.97 
  -8   8  13    2.23    1.08 
   8   7  -2    3.99    1.85 
   7   7  -1    7.28    1.89 
  -6  -7   0   -1.24    0.69 
   6   7   0   -0.94    1.29 
  -5  -7  -1    0.90    0.74 
   5   7   1   -0.35    1.24 
   4   7   2    1.17    1.33 
   3   7   3    5.70    1.47 
   2   7   4    0.72    0.61 
   2   7   4    0.05    1.13 
   1   7   5   20.63    1.28 
   1   7   5   22.26    1.76 
   0   7   6    3.73    0.77 
   0   7   6    2.55    1.07 
  -1   7   7    7.20    0.95 
  -1   7   7    5.75    1.15 
  -2   7   8    0.20    0.83 
  -2   7   8    0.46    0.71 
  -3   7   9    3.74    0.90 
  -3   7   9    2.20    0.84 
  -4   7  10    6.89    1.08 
  -4   7  10    6.64    1.12 
  -5   7  11    0.73    0.79 
  -5   7  11    0.02    0.79 
  -6   7  12    6.83    1.26 
  -6   7  12    7.51    1.17 
  -7   7  13   -0.55    0.82 
  -7   7  13   -0.22    0.93 
  -8   7  14    1.56    1.20 
  -8   7  14    2.17    1.05 
   9   6  -2   -1.36    1.61 
   8   6  -1    8.44    1.96 
  -7  -6   0    1.65    0.75 
   7   6   0    2.15    1.46 
  -6  -6  -1    1.05    0.78 
   6   6   1    0.33    1.33 
  -5  -6  -2    1.29    0.76 
   5   6   2    1.91    1.42 
   4   6   3    2.98    1.40 
   3   6   4    4.86    1.36 
   2   6   5    0.36    1.08 
   2   6   5   -0.24    0.48 
   1   6   6   78.26    2.02 
   1   6   6   80.12    2.72 
   0   6   7    0.65    0.95 
   0   6   7   -0.10    0.57 
  -1   6   8    1.80    0.84 
  -1   6   8    2.08    0.70 
  -2   6   9    1.29    0.87 
  -2   6   9    2.10    0.71 
  -3   6  10    2.05    0.79 
  -3   6  10    3.60    0.92 
  -4   6  11    2.29    0.84 
  -4   6  11    4.25    1.01 
  -5   6  12    0.47    0.84 
  -5   6  12    0.51    0.88 
  -6   6  13    3.22    1.01 
  -6   6  13    3.31    1.02 
  -7   6  14   -0.68    0.85 
  -7   6  14    0.39    1.02 
  -8   6  15    0.57    0.91 
   9   5  -1    0.11    1.65 
  -8  -5   0    3.18    0.84 
   8   5   0    3.76    1.70 
  -7  -5  -1    1.86    0.76 
   7   5   1    3.94    1.58 
  -6  -5  -2   -0.55    0.66 
   6   5   2   -1.02    1.18 
  -5  -5  -3    4.38    0.87 
   5   5   3    3.48    1.34 
   4   5   4    3.05    1.25 
   3   5   5    4.95    1.38 
   2   5   6   28.82    1.18 
   2   5   6   31.45    2.01 
   1   5   7    7.85    1.29 
   1   5   7    4.66    0.72 
   0   5   8   29.06    1.38 
   0   5   8   32.56    1.97 
  -1   5   9    0.78    0.65 
  -1   5   9    2.33    0.92 
  -2   5  10    1.28    0.88 
  -2   5  10    0.61    0.68 
  -3   5  11    0.73    0.75 
  -3   5  11   -0.72    0.75 
  -4   5  12   -0.50    0.77 
  -4   5  12   -0.49    0.75 
  -5   5  13    0.14    0.86 
  -5   5  13   -0.82    0.80 
  -6   5  14    1.74    0.98 
  -7   5  15    1.25    0.98 
  10   4  -1    0.68    1.78 
  -9  -4   0    0.29    0.70 
   9   4   0    0.29    1.63 
  -8  -4  -1   -0.88    0.63 
   8   4   1    0.03    1.53 
  -7  -4  -2    0.65    0.69 
   7   4   2   -1.00    1.39 
  -6  -4  -3    0.02    0.71 
   6   4   3   -0.48    1.29 
  -5  -4  -4    2.73    0.81 
   5   4   4    1.23    1.32 
  -4  -4  -5    2.91    0.79 
   4   4   5    4.24    1.36 
   3   4   6    6.16    1.41 
   2   4   7    1.39    1.06 
   2   4   7    0.64    0.51 
   1   4   8    0.34    0.56 
   1   4   8    0.32    0.96 
   0   4   9    9.28    0.95 
   0   4   9    9.84    1.31 
  -1   4  10    2.10    0.71 
  -1   4  10    0.01    0.77 
  -2   4  11    1.44    0.72 
  -2   4  11    2.02    0.84 
  -3   4  12    2.16    0.90 
  -3   4  12   -0.23    0.75 
  -4   4  13   -0.24    0.74 
  -4   4  13   -0.31    0.81 
  -5   4  14    0.29    0.78 
  -6   4  15    1.46    0.94 
  -7   4  16    1.59    1.04 
  10   3   0    8.46    2.05 
  -9  -3  -1    3.14    0.83 
   9   3   1    1.72    1.52 
  -8  -3  -2    2.08    0.76 
   8   3   2    1.70    1.41 
  -7  -3  -3    2.14    0.76 
   7   3   3    5.20    1.58 
  -6  -3  -4    3.00    0.81 
   6   3   4    3.75    1.46 
  -5  -3  -5   38.73    1.65 
   5   3   5   37.54    2.52 
  -4  -3  -6    0.02    0.71 
   4   3   6   -0.51    1.04 
   3   3   7    2.17    1.09 
   2   3   8    1.01    0.97 
   2   3   8   -0.27    0.52 
   1   3   9    1.43    0.62 
   1   3   9    0.52    0.89 
   0   3  10    5.80    0.85 
   0   3  10    4.55    1.05 
  -1   3  11    2.63    0.97 
  -2   3  12   14.78    1.39 
  -3   3  13    2.30    0.89 
  -4   3  14    0.76    0.81 
  -5   3  15    8.88    1.35 
  -6   3  16    7.82    1.35 
  -7   3  17    2.37    1.10 
  11   2   0   -0.20    1.76 
 -10  -2  -1    1.24    0.77 
  10   2   1    1.69    1.73 
  -9  -2  -2   12.51    1.17 
   9   2   2   15.40    2.11 
  -8  -2  -3    7.51    1.01 
   8   2   3    8.24    1.77 
  -7  -2  -4   -0.98    0.65 
   7   2   4    1.56    1.37 
  -6  -2  -5   17.64    1.21 
   6   2   5   17.72    1.90 
  -5  -2  -6    6.76    1.00 
   5   2   6    6.61    1.38 
  -4  -2  -7    0.05    0.70 
   4   2   7    0.03    1.17 
  -3  -2  -8    2.86    0.82 
   3   2   8    3.23    1.06 
   2   2   9    2.25    1.07 
   1   2  10    2.12    1.00 
   0   2  11    2.40    0.96 
  -1   2  12   15.29    1.42 
  -2   2  13   16.47    1.53 
  -3   2  14    3.89    1.04 
  -4   2  15    1.70    0.94 
  -5   2  16    5.21    1.15 
  -6   2  17    1.88    0.97 
 -11  -1  -1   -1.23    0.68 
  11   1   1    0.15    1.54 
 -10  -1  -2    4.04    0.93 
  10   1   2    5.39    1.81 
  -9  -1  -3   10.20    1.12 
   9   1   3    9.67    1.85 
  -8  -1  -4    2.64    0.82 
   8   1   4    3.14    1.38 
  -7  -1  -5    0.02    0.63 
   7   1   5   -1.96    1.08 
  -6  -1  -6    8.91    1.01 
   6   1   6   10.42    1.62 
  -5  -1  -7    3.97    0.88 
   5   1   7    3.43    1.21 
  -4  -1  -8    1.83    0.82 
   4   1   8    0.88    1.04 
  -3  -1  -9    9.25    1.04 
   3   1   9    9.07    1.30 
  -2  -1 -10   16.88    1.26 
   2   1  10   17.81    1.58 
   1   1  11    0.91    0.90 
   0   1  12    9.95    1.27 
  -1   1  13   28.58    1.79 
  -2   1  14    6.87    1.11 
  -3   1  15    1.68    0.90 
  -4   1  16    7.35    1.24 
  -5   1  17    4.07    1.12 
  -6   1  18    3.74    1.16 
 -11   0  -2    0.65    0.78 
  11   0   2    2.06    1.66 
 -10   0  -3   16.65    1.40 
  10   0   3   13.56    2.00 
  -9   0  -4    5.10    0.93 
   9   0   4    7.99    1.71 
  -8   0  -5   -0.82    0.64 
   8   0   5   -2.04    1.25 
  -7   0  -6    7.54    1.01 
   7   0   6    6.21    1.52 
  -6   0  -7    9.28    1.07 
   6   0   7    8.41    1.41 
  -5   0  -8    0.03    0.66 
   5   0   8    1.32    1.13 
  -4   0  -9    0.60    0.75 
   4   0   9    2.49    1.13 
  -3   0 -10   42.53    1.74 
  -3   0 -10   46.02    1.57 
   3   0  10   42.63    1.99 
  -2   0 -11   10.30    1.12 
   2   0  11   14.07    1.40 
  -1   0 -12    1.80    0.75 
   1   0  12    0.70    0.88 
   0   0 -13   14.97    1.18 
   0   0  13   15.43    1.45 
  -1   0  14    7.14    1.13 
  -2   0  15   14.90    1.48 
  -3   0  16    5.12    1.09 
  -4   0  17    2.34    1.07 
  -5   0  18    0.02    1.00 
 -11   1  -3    3.96    0.94 
  11  -1   3    3.08    1.66 
 -10   1  -4   14.57    1.31 
  10  -1   4   14.06    1.92 
  -9   1  -5    1.07    0.79 
   9  -1   5   -0.19    1.35 
  -8   1  -6    1.75    0.80 
   8  -1   6    1.24    1.35 
  -7   1  -7   24.86    1.47 
   7  -1   7   21.66    1.92 
  -6   1  -8   14.39    1.23 
   6  -1   8   13.27    1.60 
  -5   1  -9   -0.35    0.68 
   5  -1   9    0.08    0.99 
  -4   1 -10   25.02    1.46 
   4  -1  10   23.52    1.79 
  -3   1 -11   20.37    1.29 
  -3   1 -11   23.09    1.48 
   3  -1  11   20.81    1.65 
  -2   1 -12   -0.17    0.72 
  -2   1 -12   -0.06    0.75 
   2  -1  12    0.79    0.81 
  -1   1 -13   -0.17    0.69 
   1  -1  13    0.10    0.82 
   0   1 -14   11.61    1.08 
   0  -1  14   12.60    1.32 
   1   1 -15    3.25    0.84 
  -1  -1  15    2.59    0.92 
   2   1 -16    1.08    0.70 
  -2  -1  16   -0.29    0.77 
  -3  -1  17    0.66    0.95 
  -4  -1  18    8.20    1.33 
  -5  -1  19    3.67    1.16 
 -12   2  -3    1.77    0.95 
  12  -2   3   -1.45    1.60 
 -11   2  -4    6.33    1.07 
  11  -2   4    3.05    1.56 
 -10   2  -5   13.79    1.33 
  10  -2   5   12.15    1.82 
  -9   2  -6    1.17    0.81 
   9  -2   6    0.61    1.30 
  -8   2  -7   37.52    1.68 
   8  -2   7   34.86    2.23 
  -7   2  -8    9.30    1.10 
   7  -2   8   10.67    1.51 
  -6   2  -9   -0.92    0.61 
   6  -2   9   -0.02    0.99 
  -5   2 -10   -0.25    0.62 
   5  -2  10    1.52    0.99 
  -4   2 -11    8.54    1.00 
   4  -2  11    9.39    1.27 
  -3   2 -12    8.59    1.07 
  -3   2 -12    8.05    1.01 
   3  -2  12    7.89    1.12 
  -2   2 -13    3.14    0.98 
  -2   2 -13    3.55    0.84 
   2  -2  13    5.02    1.03 
  -1   2 -14   11.09    1.30 
  -1   2 -14   10.65    1.05 
   1  -2  14   10.61    1.25 
   0   2 -15    6.24    1.22 
   0   2 -15    6.03    0.93 
   0  -2  15    6.96    1.15 
   1   2 -16   11.09    1.08 
   1   2 -16    9.93    1.40 
  -1  -2  16   12.47    1.35 
   2   2 -17    3.86    1.27 
  -2  -2  17    1.63    0.96 
   3   2 -18    6.60    1.48 
  -3  -2  18    4.13    1.09 
   4   2 -19    3.79    1.47 
  -4  -2  19    3.55    1.11 
 -12   3  -4    2.46    0.97 
 -11   3  -5    2.83    0.97 
  11  -3   5    1.16    1.45 
 -10   3  -6    1.29    0.85 
  10  -3   6   -0.46    1.35 
  -9   3  -7   12.57    1.30 
   9  -3   7    8.23    1.55 
  -8   3  -8   19.51    1.49 
   8  -3   8   22.19    1.89 
  -7   3  -9   14.47    1.29 
   7  -3   9   13.74    1.51 
  -6   3 -10   -0.13    0.65 
   6  -3  10    0.62    0.99 
  -5   3 -11   -0.87    0.61 
   5  -3  11   -0.54    0.87 
  -4   3 -12    0.04    0.67 
   4  -3  12    0.03    0.81 
  -3   3 -13    0.26    0.92 
  -3   3 -13    1.22    0.75 
   3  -3  13    0.40    0.80 
  -2   3 -14    9.75    1.27 
  -2   3 -14    9.25    1.04 
   2  -3  14   10.41    1.27 
  -1   3 -15   12.01    1.10 
  -1   3 -15   13.98    1.50 
   1  -3  15   12.70    1.38 
   0   3 -16    2.16    0.78 
   0   3 -16    1.99    1.17 
   0  -3  16    1.01    0.89 
   1   3 -17    0.27    1.17 
   1   3 -17   -1.59    0.60 
  -1  -3  17    0.03    0.76 
   2   3 -18   12.25    1.78 
  -2  -3  18   10.24    1.41 
   3   3 -19    3.57    1.45 
  -3  -3  19    3.02    1.13 
 -11   4  -6    0.40    0.88 
  11  -4   6    1.05    1.37 
 -10   4  -7    0.52    0.80 
  10  -4   7   -1.95    1.12 
  -9   4  -8    6.65    1.11 
   9  -4   8    6.54    1.45 
  -8   4  -9    1.22    0.78 
   8  -4   9    0.88    1.09 
  -7   4 -10    0.95    0.74 
   7  -4  10   -0.06    0.96 
  -6   4 -11   10.09    1.16 
   6  -4  11   11.04    1.35 
  -5   4 -12   10.42    1.14 
   5  -4  12    9.07    1.21 
  -4   4 -13    6.54    1.20 
  -4   4 -13    9.09    1.03 
   4  -4  13    7.09    1.18 
  -3   4 -14    1.18    1.10 
  -3   4 -14    0.43    0.74 
   3  -4  14   -0.09    0.80 
  -2   4 -15   37.00    2.35 
  -2   4 -15   31.41    1.52 
   2  -4  15   34.77    1.82 
  -1   4 -16    5.33    1.37 
  -1   4 -16    3.60    0.83 
   1  -4  16    3.13    0.99 
   0   4 -17    0.43    0.70 
   0   4 -17    0.75    1.25 
   0  -4  17    0.02    0.83 
   1   4 -18    3.68    1.33 
  -1  -4  18    2.63    1.03 
   2   4 -19    1.65    1.44 
  -2  -4  19    2.08    1.07 
   3   4 -20    3.01    1.65 
  -3  -4  20    4.21    1.32 
 -11   5  -7    0.02    0.86 
 -10   5  -8    2.43    0.97 
  -9   5  -9    3.04    0.96 
  -8   5 -10    3.61    0.91 
   8  -5  10    0.54    1.05 
  -7   5 -11   -0.65    0.75 
   7  -5  11   -1.48    0.87 
  -6   5 -12   11.29    1.22 
   6  -5  12   12.44    1.34 
  -5   5 -13    1.65    0.78 
   5  -5  13    1.72    0.90 
  -4   5 -14    1.01    0.76 
  -4   5 -14    0.48    1.13 
   4  -5  14    0.65    0.81 
  -3   5 -15    8.29    1.05 
  -3   5 -15    5.69    1.39 
   3  -5  15    6.35    1.09 
  -2   5 -16    5.35    1.48 
  -2   5 -16    5.70    0.90 
   2  -5  16    5.97    1.11 
  -1   5 -17    2.35    1.40 
  -1   5 -17    0.85    0.68 
   1  -5  17    0.37    0.81 
   0   5 -18    1.20    1.42 
   0  -5  18   -0.20    0.82 
   1   5 -19    2.00    1.54 
  -1  -5  19    1.79    1.01 
   2   5 -20    1.16    1.66 
  -2  -5  20    3.01    1.16 
 -11   6  -8   -0.61    0.84 
 -10   6  -9    1.78    0.96 
  -9   6 -10    2.04    0.89 
  -8   6 -11   -0.22    0.71 
  -7   6 -12    0.47    0.80 
  -6   6 -13    5.46    0.99 
  -5   6 -14   12.39    1.27 
   5  -6  14   12.32    1.27 
  -4   6 -15    0.63    0.76 
  -4   6 -15   -1.15    1.21 
   4  -6  15    0.58    0.78 
  -3   6 -16    3.27    0.88 
  -3   6 -16    4.22    1.42 
   3  -6  16    3.89    0.97 
  -2   6 -17    0.98    0.78 
  -2   6 -17    1.38    1.47 
   2  -6  17    2.12    0.92 
  -1   6 -18   -1.57    1.37 
   1  -6  18    0.40    0.86 
   0   6 -19    0.04    1.61 
   0  -6  19    3.44    1.03 
 -10   7 -10    2.30    1.02 
  -9   7 -11    1.98    0.99 
  -8   7 -12   -0.08    0.85 
  -7   7 -13    1.17    0.87 
  -6   7 -14   -0.15    0.80 
  -5   7 -15   -0.50    0.73 
  -4   7 -16    1.43    0.87 
  -4   7 -16   -0.59    1.26 
  -3   7 -17   -1.06    0.64 
  -3   7 -17    0.14    1.35 
  -2   7 -18    0.46    1.56 
  -1   7 -19    0.52    1.71 
   1  -7  19    0.21    0.87 
  -9   8 -12   -0.25    0.81 
  -8   8 -13   -1.55    0.81 
  -7   8 -14   -0.60    0.83 
  -6   8 -15    1.04    0.87 
  -5   8 -16   -0.82    0.79 
  -4   8 -17    2.80    1.58 
  -4   8 -17    4.07    0.97 
  -3   8 -18   -1.46    1.64 
  -7   9 -15   -1.24    0.80 
  -6   9 -16   -1.36    0.75 
   0  13   1   -1.23    0.88 
  -1  13   2   -0.45    0.91 
  -2  13   3    2.96    1.05 
  -3  13   4    0.29    0.95 
  -4  13   5    2.29    1.12 
   2  12   0   -2.68    1.19 
   1  12   1   -0.12    1.28 
   1  12   1   -0.61    0.88 
   0  12   2    0.02    1.18 
   0  12   2    0.36    0.90 
  -1  12   3   -0.62    0.85 
  -2  12   4    1.74    0.95 
  -3  12   5    5.25    1.20 
  -4  12   6    2.80    1.08 
  -5  12   7    3.00    1.14 
   4  11  -1   -2.01    1.46 
   3  11   0   -1.49    1.34 
   2  11   1   -0.32    1.29 
   1  11   2    8.31    1.20 
   1  11   2    5.57    1.42 
   0  11   3   -0.67    1.09 
   0  11   3    0.81    0.84 
  -1  11   4    3.53    1.18 
  -1  11   4    5.81    1.10 
  -2  11   5   -0.53    0.80 
  -2  11   5   -0.87    0.82 
  -3  11   6   -0.57    0.72 
  -3  11   6    0.39    0.90 
  -4  11   7    1.74    0.98 
  -5  11   8    1.27    1.03 
  -6  11   9    0.63    0.96 
   5  10  -1    3.16    1.65 
   4  10   0   -1.36    1.20 
   3  10   1    0.74    1.35 
   2  10   2    7.06    1.55 
   1  10   3    4.67    1.40 
   1  10   3    4.90    0.97 
   0  10   4   -0.27    0.73 
   0  10   4   -0.63    1.07 
  -1  10   5    3.73    1.13 
  -1  10   5    2.85    0.96 
  -2  10   6    1.01    0.82 
  -2  10   6    0.94    0.92 
  -3  10   7    0.51    0.86 
  -3  10   7    0.07    0.91 
  -4  10   8    0.33    0.85 
  -4  10   8   -0.47    0.86 
  -5  10   9   -0.46    0.80 
  -5  10   9   -0.93    0.77 
  -6  10  10    3.03    1.06 
  -6  10  10    2.68    1.11 
  -7  10  11    2.95    1.17 
   6   9  -1    3.36    1.72 
   5   9   0    2.32    1.57 
   4   9   1   -0.53    1.39 
   3   9   2    3.38    1.47 
   2   9   3    5.15    0.92 
   2   9   3    5.65    1.47 
   1   9   4   -0.62    1.06 
   1   9   4   -0.21    0.69 
   0   9   5    1.25    1.09 
   0   9   5    1.28    0.80 
  -1   9   6    7.46    1.04 
  -1   9   6    6.98    1.26 
  -2   9   7    4.49    1.06 
  -2   9   7    3.78    0.95 
  -3   9   8    0.24    0.72 
  -3   9   8   -0.66    0.81 
  -4   9   9   -0.98    0.76 
  -4   9   9    1.65    0.89 
  -5   9  10    2.96    1.02 
  -5   9  10    3.67    1.03 
  -6   9  11    1.40    1.04 
  -6   9  11    1.72    0.95 
  -7   9  12   -0.28    0.87 
  -7   9  12   -0.30    0.99 
   7   8  -1    7.19    1.84 
   6   8   0   14.44    2.04 
  -5  -8  -1   -1.85    0.65 
   5   8   1    1.13    1.47 
   4   8   2   11.50    1.84 
   3   8   3    7.09    1.51 
   2   8   4    1.39    1.20 
   2   8   4    2.77    0.71 
   1   8   5    1.66    0.74 
   1   8   5    2.86    1.17 
   0   8   6   11.73    1.46 
   0   8   6   10.40    1.08 
  -1   8   7   12.33    1.21 
  -1   8   7    9.06    1.34 
  -2   8   8    0.62    0.86 
  -2   8   8   -0.20    0.72 
  -3   8   9    4.08    0.98 
  -3   8   9    7.47    1.22 
  -4   8  10    8.43    1.22 
  -4   8  10    8.15    1.22 
  -5   8  11    4.65    1.06 
  -5   8  11    1.35    0.88 
  -6   8  12    1.02    0.92 
  -6   8  12   -0.49    0.83 
  -7   8  13    2.74    1.12 
  -7   8  13    2.32    1.10 
   8   7  -1    3.60    1.89 
   7   7   0   20.14    2.36 
  -6  -7  -1    2.87    0.90 
   6   7   1    3.05    1.63 
  -5  -7  -2    0.21    0.76 
   5   7   2   -0.21    1.40 
   4   7   3   16.74    1.90 
   3   7   4    9.24    1.59 
   2   7   5    6.18    1.29 
   2   7   5    5.15    0.76 
   1   7   6   -0.57    0.99 
   1   7   6    0.73    0.60 
   0   7   7   73.42    2.14 
   0   7   7   66.64    2.55 
  -1   7   8   31.33    1.88 
  -1   7   8   32.73    1.63 
  -2   7   9    2.69    0.96 
  -2   7   9    0.04    0.69 
  -3   7  10    9.52    1.29 
  -3   7  10    8.83    1.20 
  -4   7  11   15.08    1.48 
  -4   7  11   12.94    1.35 
  -5   7  12   -0.56    0.82 
  -5   7  12    0.56    0.87 
  -6   7  13   -0.71    0.86 
  -6   7  13   -0.05    0.85 
  -7   7  14   18.86    1.91 
  -7   7  14   18.81    1.83 
   9   6  -1    1.46    1.72 
   8   6   0    2.98    1.74 
  -7  -6  -1    3.13    0.85 
   7   6   1    1.63    1.59 
  -6  -6  -2    0.61    0.78 
   6   6   2   -0.72    1.40 
  -5  -6  -3    5.71    0.98 
   5   6   3    6.01    1.63 
   4   6   4   12.21    1.79 
   3   6   5    3.92    1.33 
   2   6   6    1.99    1.17 
   2   6   6    3.25    0.64 
   1   6   7   -0.67    0.98 
   1   6   7    0.36    0.57 
   0   6   8   65.15    2.00 
  -1   6   9   -1.01    0.79 
  -1   6   9   -0.03    0.61 
  -2   6  10    0.70    0.87 
  -2   6  10   -0.25    0.66 
  -3   6  11    5.31    1.14 
  -3   6  11    4.81    1.00 
  -4   6  12    5.79    1.17 
  -4   6  12    6.60    1.14 
  -5   6  13    1.57    0.98 
  -5   6  13    2.26    0.96 
  -6   6  14    4.93    1.08 
  -6   6  14    2.92    1.15 
  -7   6  15   28.93    2.02 
   9   5   0    7.54    2.06 
  -8  -5  -1    1.19    0.78 
   8   5   1    3.07    1.65 
  -7  -5  -2    7.04    1.01 
   7   5   2    7.36    1.69 
  -6  -5  -3   -0.02    0.71 
   6   5   3   -1.28    1.15 
  -5  -5  -4    6.02    0.97 
   5   5   4    8.90    1.61 
   4   5   5   12.65    1.66 
   3   5   6    2.39    1.21 
   2   5   7    7.67    0.79 
   2   5   7    4.84    1.16 
   1   5   8    5.39    1.20 
   1   5   8    5.60    0.75 
   0   5   9    5.24    1.09 
   0   5   9    5.37    0.83 
  -1   5  10   -1.47    0.78 
  -1   5  10    0.08    0.62 
  -2   5  11   14.81    1.44 
  -2   5  11   14.38    1.27 
  -3   5  12    1.14    0.75 
  -3   5  12    0.50    0.81 
  -4   5  13   -0.65    0.81 
  -4   5  13   -0.70    0.80 
  -5   5  14    5.87    1.15 
  -5   5  14    6.70    1.26 
  -6   5  15   16.82    1.67 
  -7   5  16    1.92    1.11 
  10   4   0   -0.02    1.85 
  -9  -4  -1    0.83    0.79 
   9   4   1    2.00    1.67 
  -8  -4  -2   10.45    1.14 
   8   4   2    6.87    1.81 
  -7  -4  -3    4.86    0.94 
   7   4   3    4.73    1.64 
  -6  -4  -4    6.06    1.00 
   6   4   4    9.12    1.62 
  -5  -4  -5    9.45    1.12 
   5   4   5    7.93    1.49 
  -4  -4  -6    0.92    0.77 
   4   4   6   -0.72    1.14 
   3   4   7    0.03    1.04 
   2   4   8    6.71    0.74 
   2   4   8    7.15    1.28 
   1   4   9    5.53    1.17 
   1   4   9    5.03    0.75 
   0   4  10    0.81    0.62 
   0   4  10    0.02    0.88 
  -1   4  11    7.50    1.16 
  -1   4  11    9.77    1.07 
  -2   4  12   25.21    1.62 
  -2   4  12   26.33    1.69 
  -3   4  13   -0.34    0.82 
  -4   4  14    1.49    0.93 
  -5   4  15    7.23    1.21 
  -6   4  16    0.80    1.02 
 -10  -3  -1   -0.13    0.74 
  10   3   1   -1.29    1.67 
  -9  -3  -2    0.23    0.72 
   9   3   2    0.87    1.54 
  -8  -3  -3    1.70    0.78 
   8   3   3    1.15    1.43 
  -7  -3  -4   -0.67    0.69 
   7   3   4   -3.28    1.27 
  -6  -3  -5   -0.05    0.72 
   6   3   5   -1.63    1.11 
  -5  -3  -6   -0.17    0.65 
   5   3   6   -0.70    1.18 
  -4  -3  -7    1.01    0.71 
   4   3   7    1.54    1.08 
   3   3   8    1.59    1.02 
   2   3   9   22.15    1.78 
   1   3  10    8.02    1.28 
   0   3  11    0.77    0.81 
  -1   3  12   26.78    1.69 
  -2   3  13    2.94    1.01 
  -3   3  14    0.85    0.81 
  -4   3  15    1.34    0.98 
  -5   3  16    4.43    1.10 
  -6   3  17    0.98    0.94 
 -10  -2  -2    8.85    1.16 
  10   2   2   11.31    2.05 
  -9  -2  -3    2.71    0.82 
   9   2   3    2.86    1.61 
  -8  -2  -4   -0.13    0.73 
   8   2   4    0.56    1.44 
  -7  -2  -5    1.68    0.81 
   7   2   5    2.43    1.40 
  -6  -2  -6    6.88    1.00 
   6   2   6    5.79    1.45 
  -5  -2  -7    0.86    0.72 
   5   2   7    1.29    1.21 
  -4  -2  -8    0.90    0.74 
   4   2   8    1.49    1.06 
  -3  -2  -9    1.42    0.83 
   3   2   9    0.51    0.98 
   2   2  10    7.03    1.26 
   1   2  11    1.63    0.95 
   0   2  12    0.47    0.85 
  -1   2  13    1.45    0.92 
  -2   2  14    0.30    0.89 
  -3   2  15    0.76    0.92 
  -4   2  16   -0.90    0.85 
  -5   2  17    2.84    1.12 
  -6   2  18    0.80    1.04 
 -11  -1  -2   -0.77    0.75 
  11   1   2   -1.05    1.65 
 -10  -1  -3    1.42    0.81 
  10   1   3    1.55    1.64 
  -9  -1  -4   -0.98    0.68 
   9   1   4    0.04    1.45 
  -8  -1  -5    4.61    0.94 
   8   1   5    6.54    1.65 
  -7  -1  -6    4.23    0.92 
   7   1   6    1.10    1.40 
  -6  -1  -7   -0.58    0.70 
   6   1   7   -1.93    1.02 
  -5  -1  -8   -0.15    0.73 
   5   1   8    0.64    1.06 
  -4  -1  -9    1.13    0.79 
   4   1   9    0.54    1.06 
  -3  -1 -10   22.00    1.37 
   3   1  10   25.30    1.91 
  -2  -1 -11    2.67    0.88 
   2   1  11    3.43    1.07 
   1   1  12    9.03    1.26 
   0   1  13   -0.79    0.73 
  -1   1  14    0.64    0.89 
  -2   1  15    0.23    0.79 
  -3   1  16    8.90    1.31 
  -4   1  17    2.50    1.10 
  -5   1  18    0.71    1.04 
 -11   0  -3   -0.21    0.80 
  11   0   3   -0.35    1.58 
 -10   0  -4    0.32    0.80 
  10   0   4   -0.50    1.44 
  -9   0  -5    1.23    0.77 
   9   0   5   -0.26    1.40 
  -8   0  -6    2.29    0.79 
   8   0   6    2.64    1.42 
  -7   0  -7    0.53    0.68 
   7   0   7   -0.23    1.11 
  -6   0  -8   -0.85    0.68 
   6   0   8    0.84    1.18 
  -5   0  -9    2.55    0.84 
   5   0   9    1.30    1.02 
  -4   0 -10    7.17    1.03 
   4   0  10    7.37    1.32 
  -3   0 -11    1.18    0.80 
   3   0  11    1.37    0.93 
  -2   0 -12    1.22    0.78 
   2   0  12    1.11    0.92 
  -1   0 -13    0.09    0.72 
   1   0  13    1.77    0.96 
   0   0 -14   -0.30    0.71 
   0   0  14    0.68    0.91 
   1   0 -15    0.81    0.74 
  -1   0  15    2.57    1.01 
  -2   0  16    2.26    1.03 
  -3   0  17    8.45    1.28 
  -4   0  18    4.19    1.17 
  -5   0  19    0.77    1.13 
 -11   1  -4    4.99    1.07 
  11  -1   4    5.45    1.75 
 -10   1  -5    1.24    0.79 
  10  -1   5   -0.31    1.39 
  -9   1  -6    8.34    1.09 
   9  -1   6    8.71    1.69 
  -8   1  -7    5.96    1.02 
   8  -1   7    3.56    1.34 
  -7   1  -8    0.73    0.78 
   7  -1   8   -0.11    1.21 
  -6   1  -9    0.43    0.74 
   6  -1   9    2.12    1.20 
  -5   1 -10    6.77    0.99 
   5  -1  10    4.93    1.22 
  -4   1 -11    3.36    0.83 
   4  -1  11    1.05    1.00 
  -3   1 -12    1.23    0.72 
   3  -1  12    1.01    0.83 
  -2   1 -13    0.10    0.67 
  -2   1 -13    0.98    0.80 
   2  -1  13    1.45    0.93 
  -1   1 -14    0.70    0.79 
  -1   1 -14   -0.42    0.68 
   1  -1  14   -0.19    0.83 
   0   1 -15   14.32    1.20 
   0  -1  15   12.19    1.42 
   1   1 -16   -0.34    0.69 
  -1  -1  16   -0.80    0.76 
   2   1 -17    2.16    0.78 
  -2  -1  17   -0.45    0.89 
  -3  -1  18    1.04    1.01 
  -4  -1  19    1.99    1.13 
 -11   2  -5    1.44    0.90 
  11  -2   5    3.25    1.66 
 -10   2  -6    4.66    0.99 
  10  -2   6    2.78    1.52 
  -9   2  -7    7.18    1.06 
   9  -2   7    4.43    1.47 
  -8   2  -8    0.98    0.81 
   8  -2   8    2.07    1.32 
  -7   2  -9    1.72    0.77 
   7  -2   9   -0.21    1.14 
  -6   2 -10   -0.78    0.66 
   6  -2  10   -1.09    1.01 
  -5   2 -11    2.74    0.80 
   5  -2  11    3.04    1.12 
  -4   2 -12    1.96    0.81 
   4  -2  12    3.47    1.03 
  -3   2 -13    5.12    0.94
[truncated: 48,366 more chars]
